# Supplementary material for: An Exploratory Analysis of Changes in Circulating Plasma Protein Profiles Following Image-Guided Ablation of Renal Tumours Provides Evidence for Effects on Multiple Biological Processes
Source: MDPI journal article supplement (doi:10.3390/cancers13236037), 2021-11-30

**Figure S9.** Longitudinal profiles of all plasma proteins on the Oncology II panel, prior to and post-ablation. Results for each protein are shown as linear NPX values and are shown for patients receiving CRYO (n=25) with the three patients who developed acute complications post-CRYO highlighted. Dotted lines indicate the lower limit of quantitation.

# Uniprot ID: P40222, analyte:TXLNA

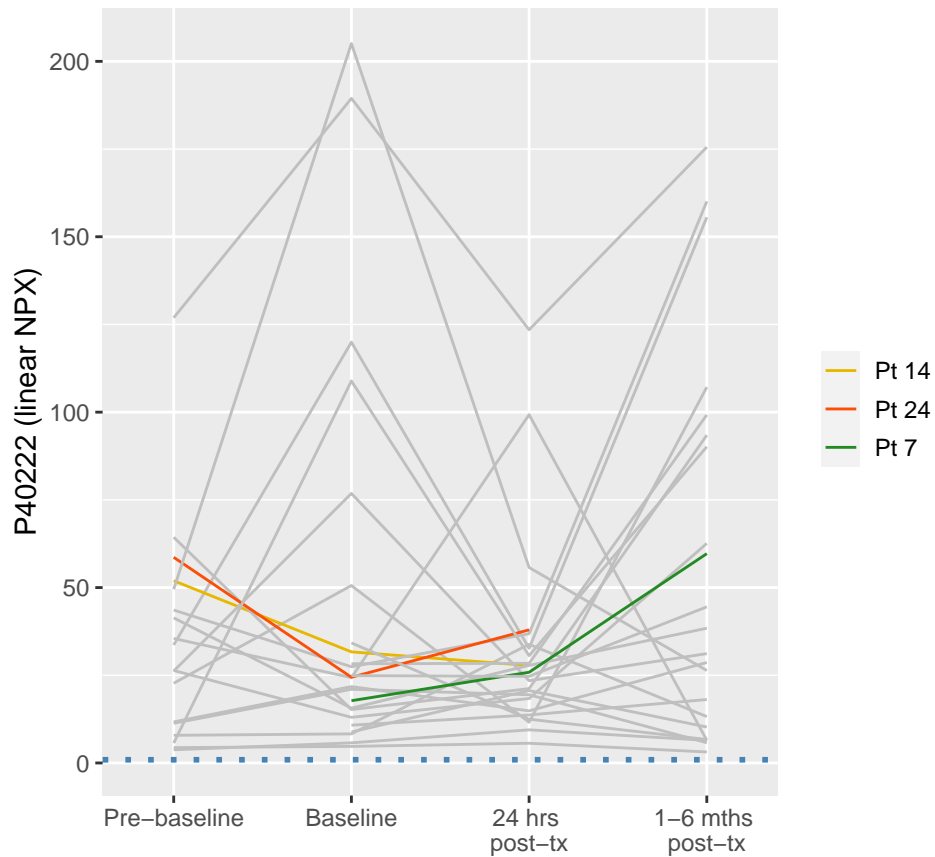

# Uniprot ID: P15692, analyte:VEGFA

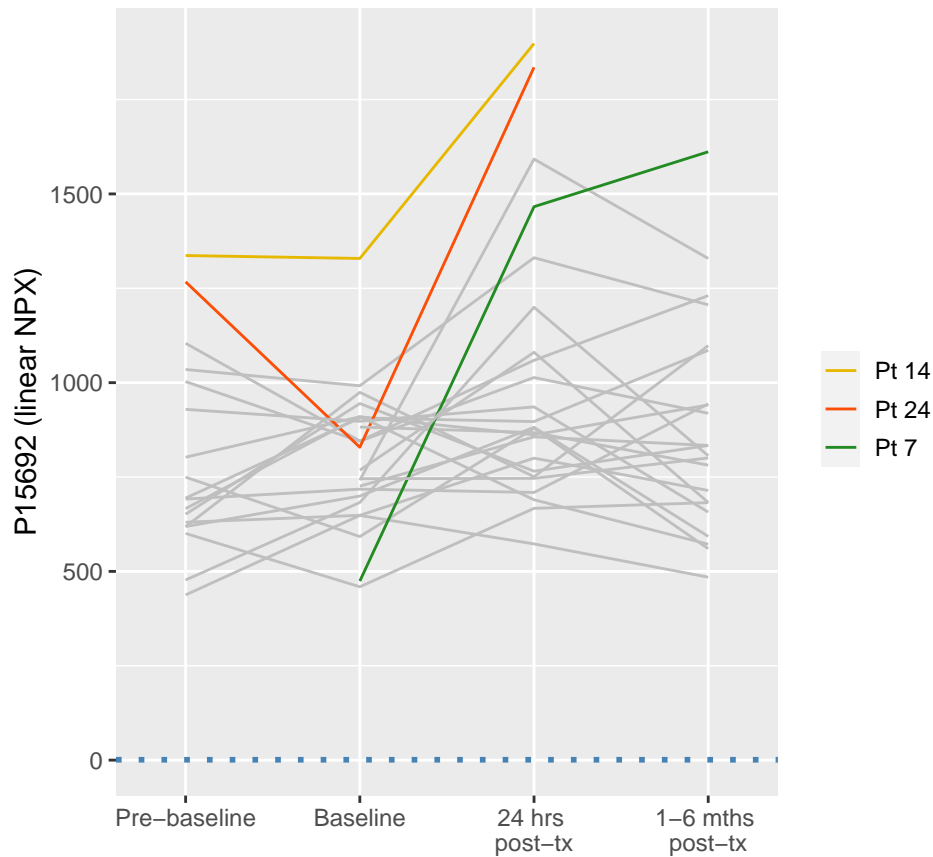

# Uniprot ID: P16870, analyte:CPE

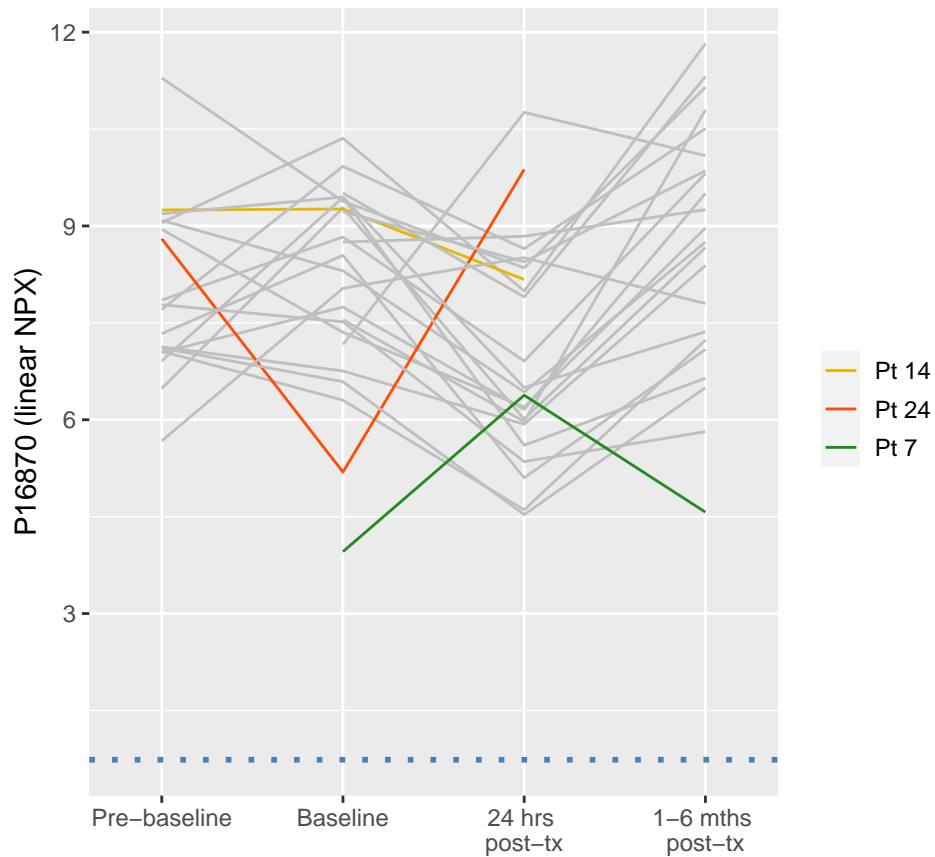

# Uniprot ID: Q9UKR3, analyte:KLK13

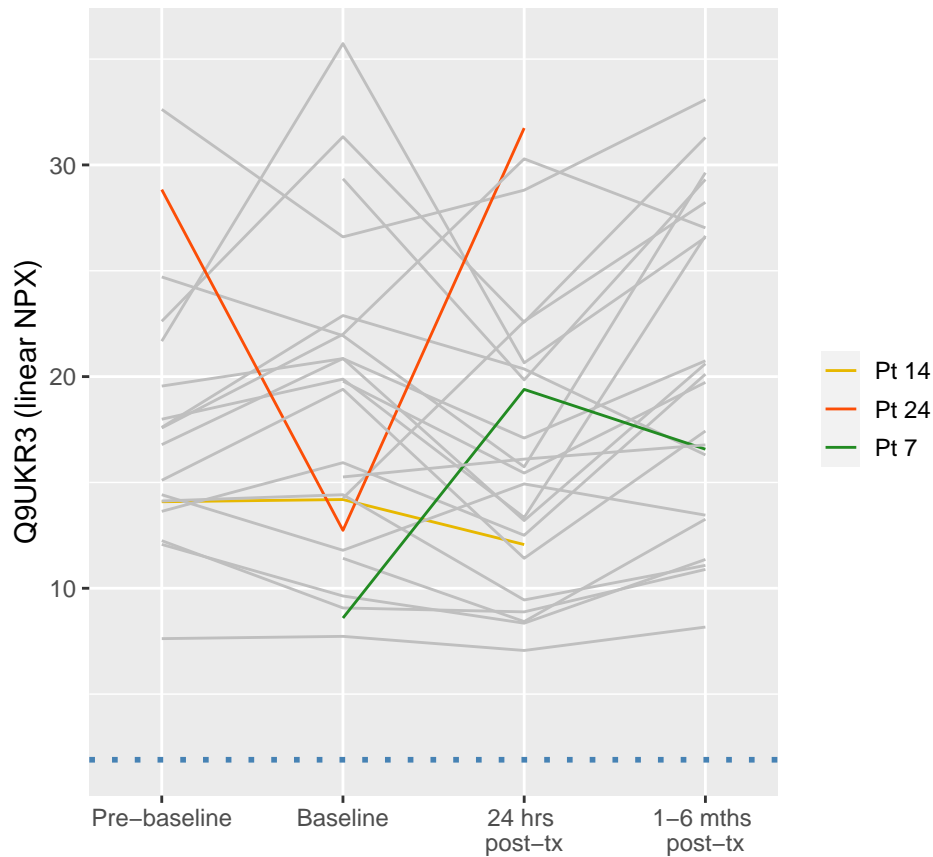

# Uniprot ID: P13688, analyte:CEACAM1

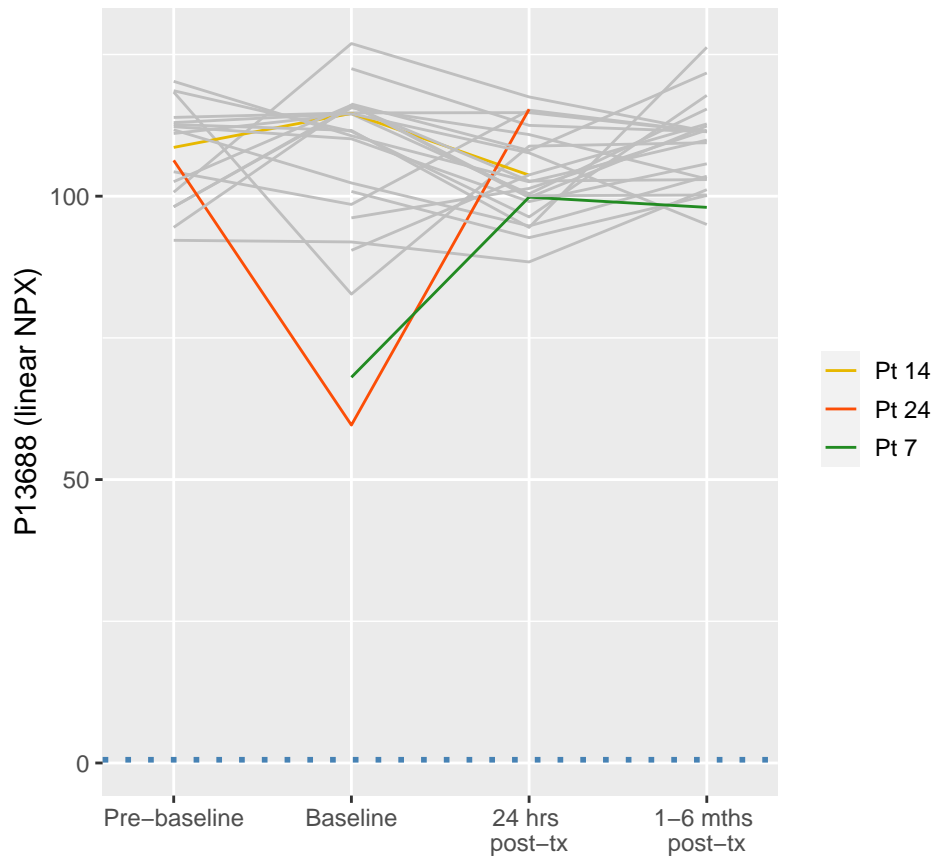

# Uniprot ID: Q13421, analyte:MSLN

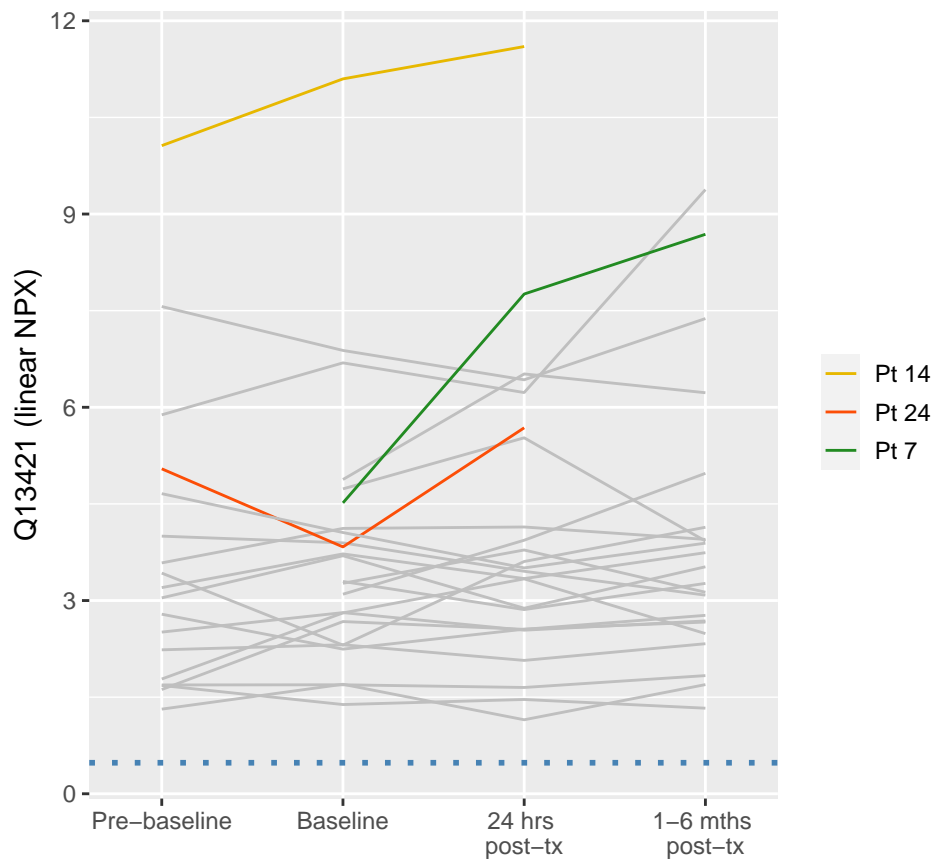

# Uniprot ID: O75888, analyte:TNFSF13

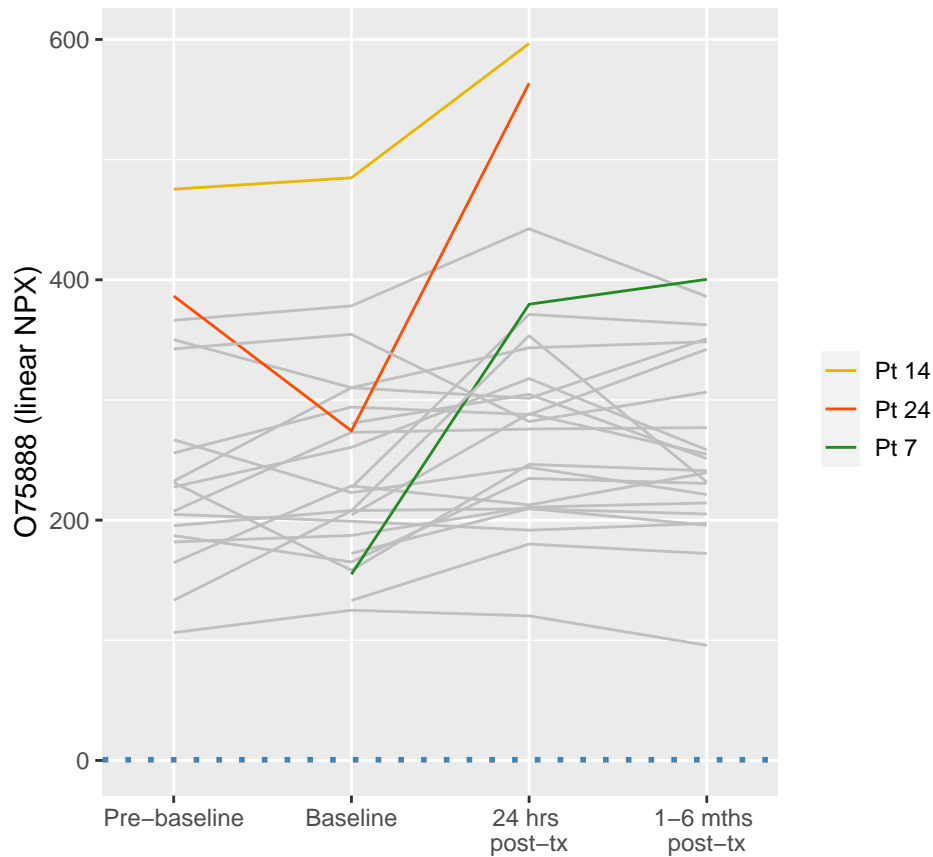



# Uniprot ID: P01133, analyte:EGF

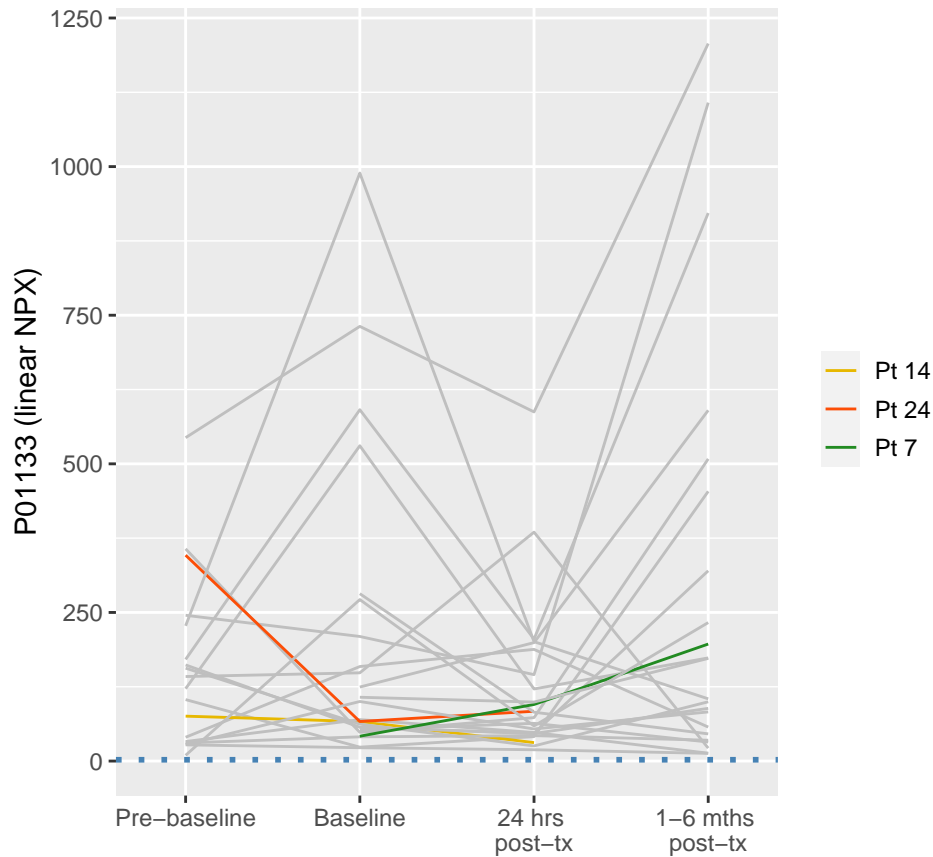

# Uniprot ID: O95407, analyte:TNFRSF6B

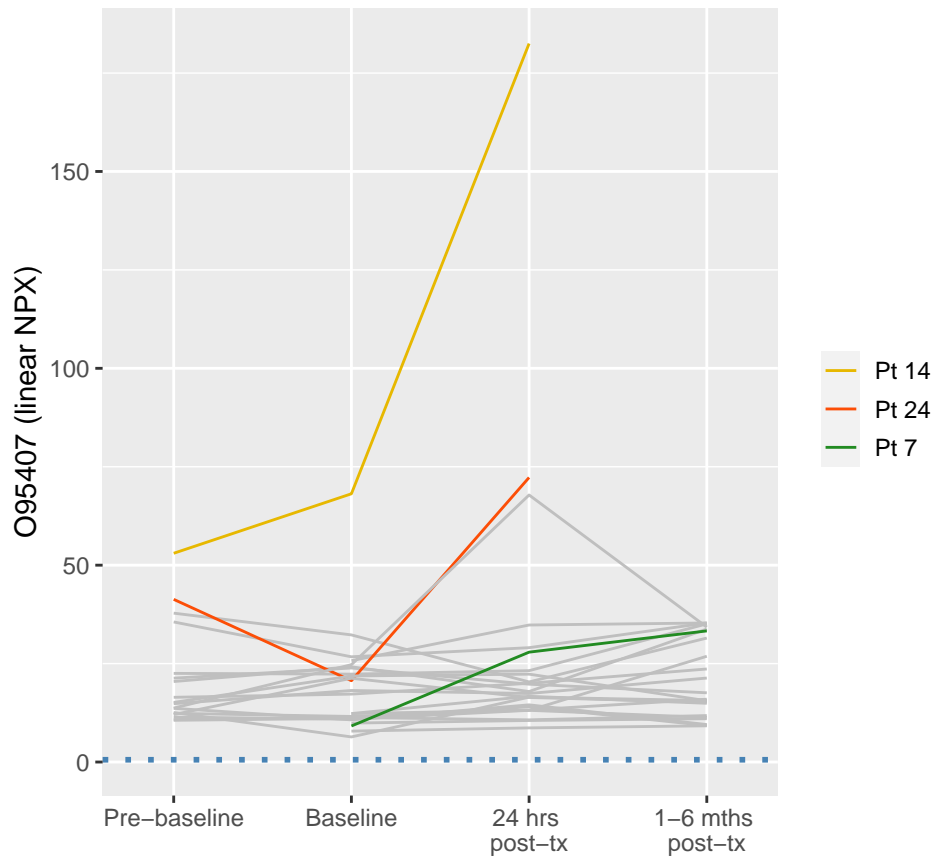

# Uniprot ID: P18827, analyte:SYND1

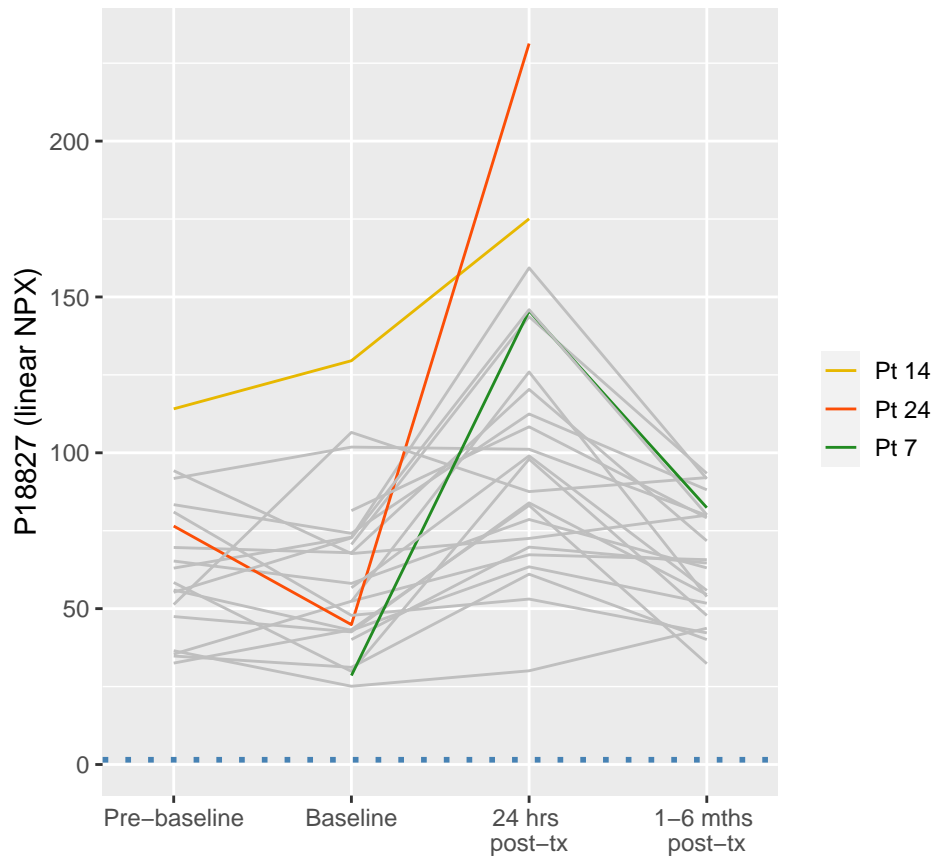

# Uniprot ID: P37173, analyte: TGFR-2

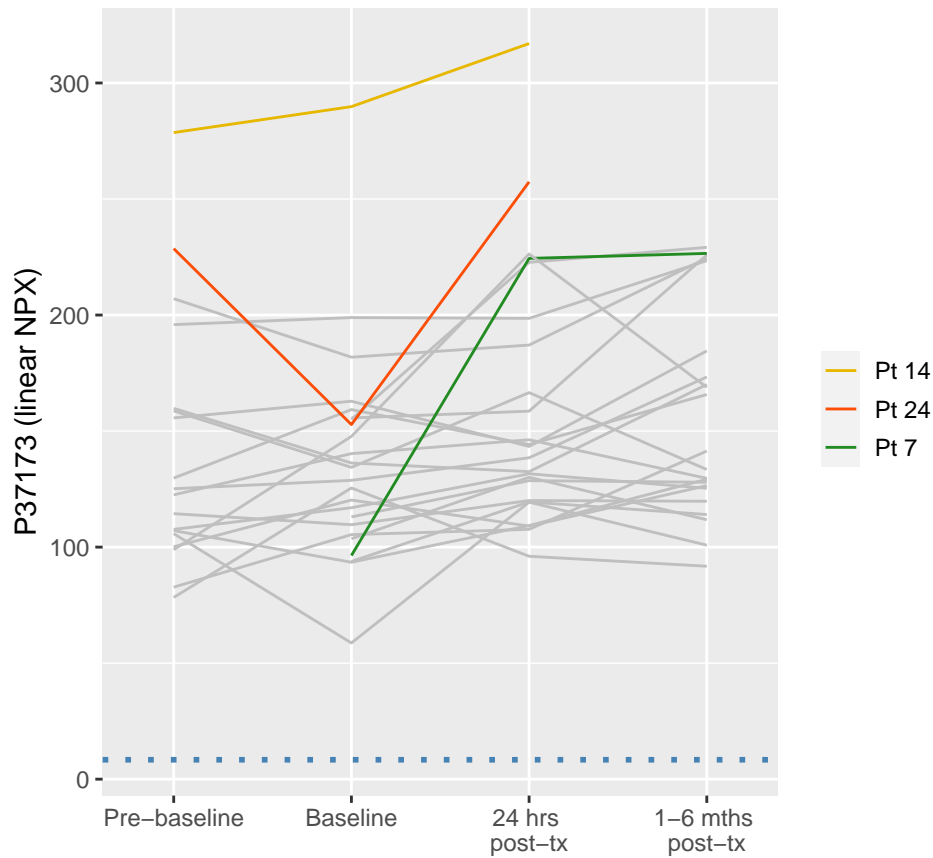

# Uniprot ID: P05231, analyte:IL6

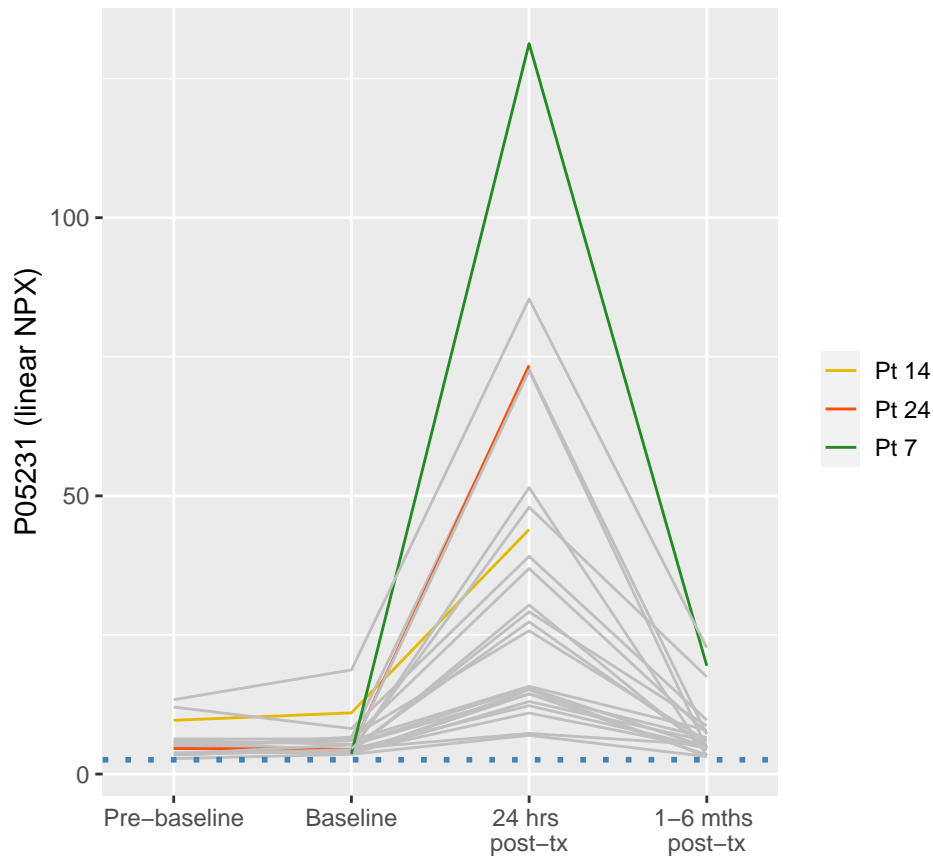

# Uniprot ID: P09326, analyte:CD48

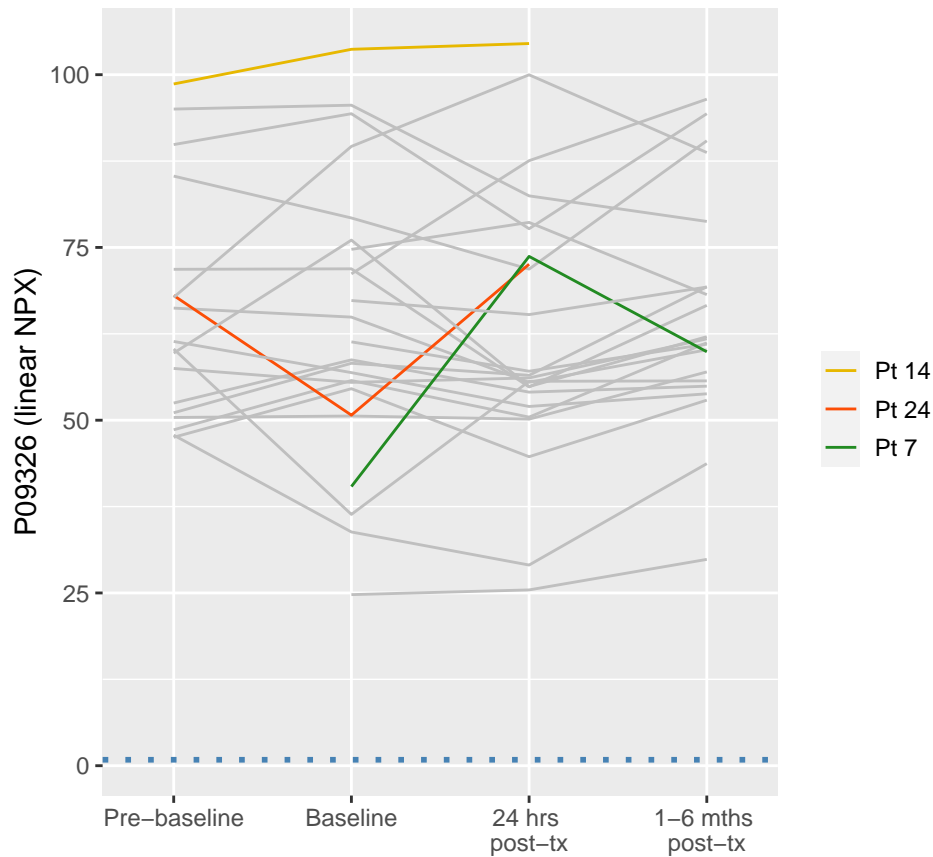

# Uniprot ID: O14828, analyte:SCAMP3

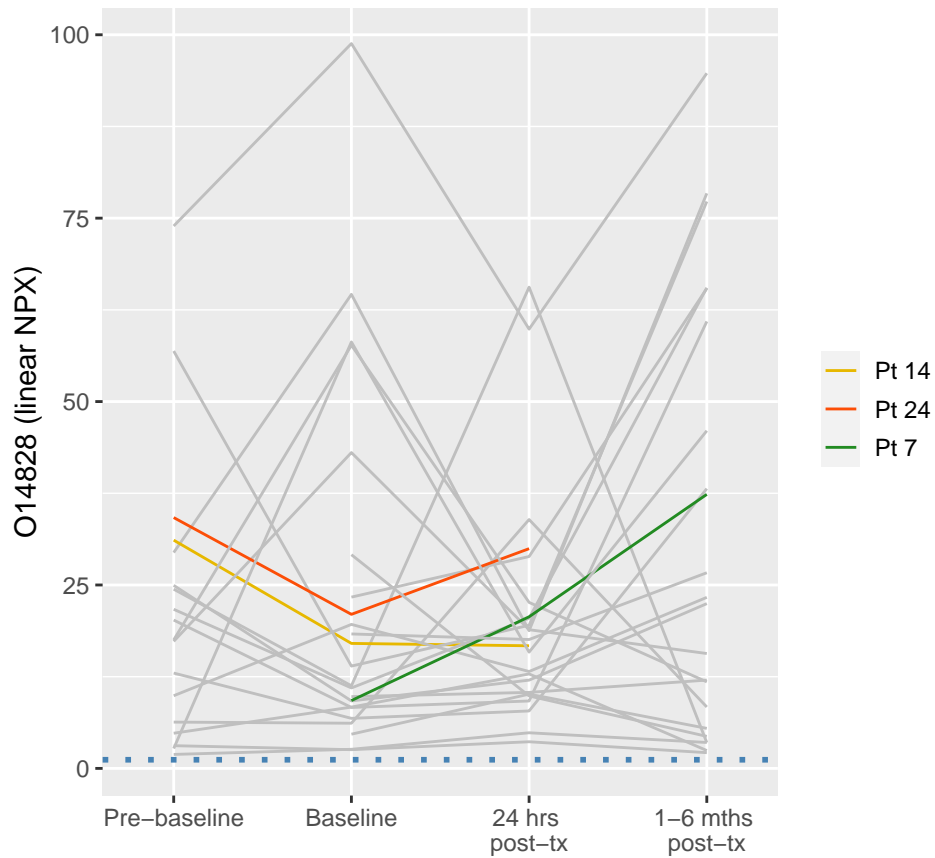

# Uniprot ID: Q9HBG7, analyte:LY9

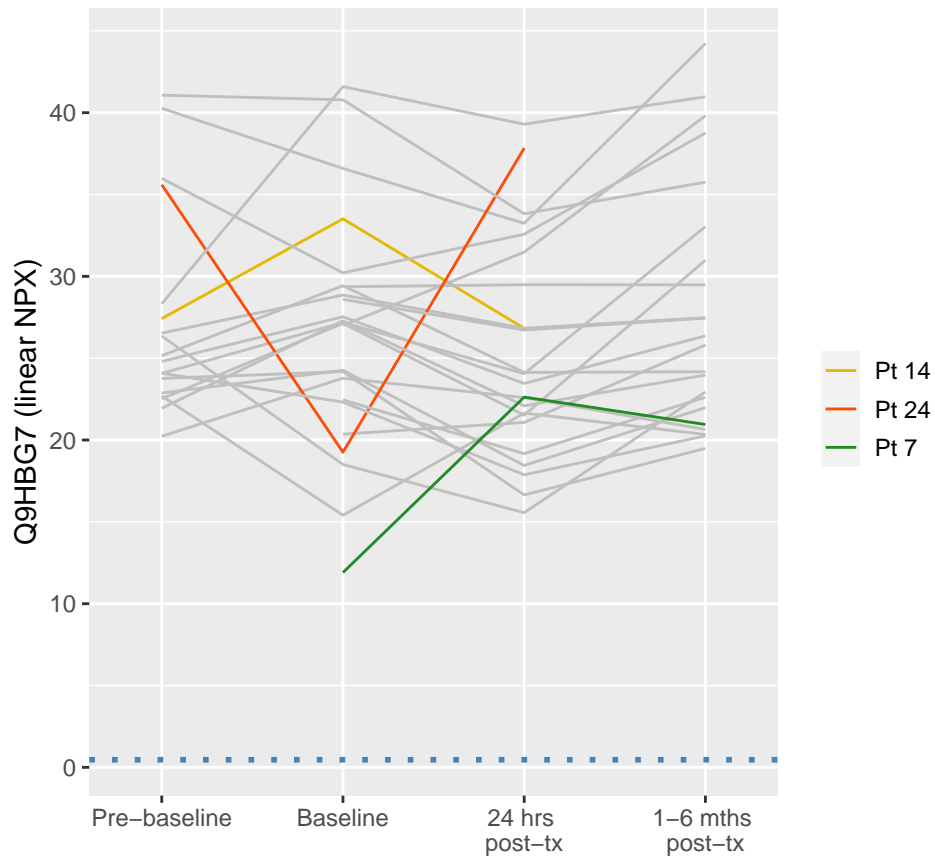



# Uniprot ID: P15260, analyte:IFN-gamma-R1

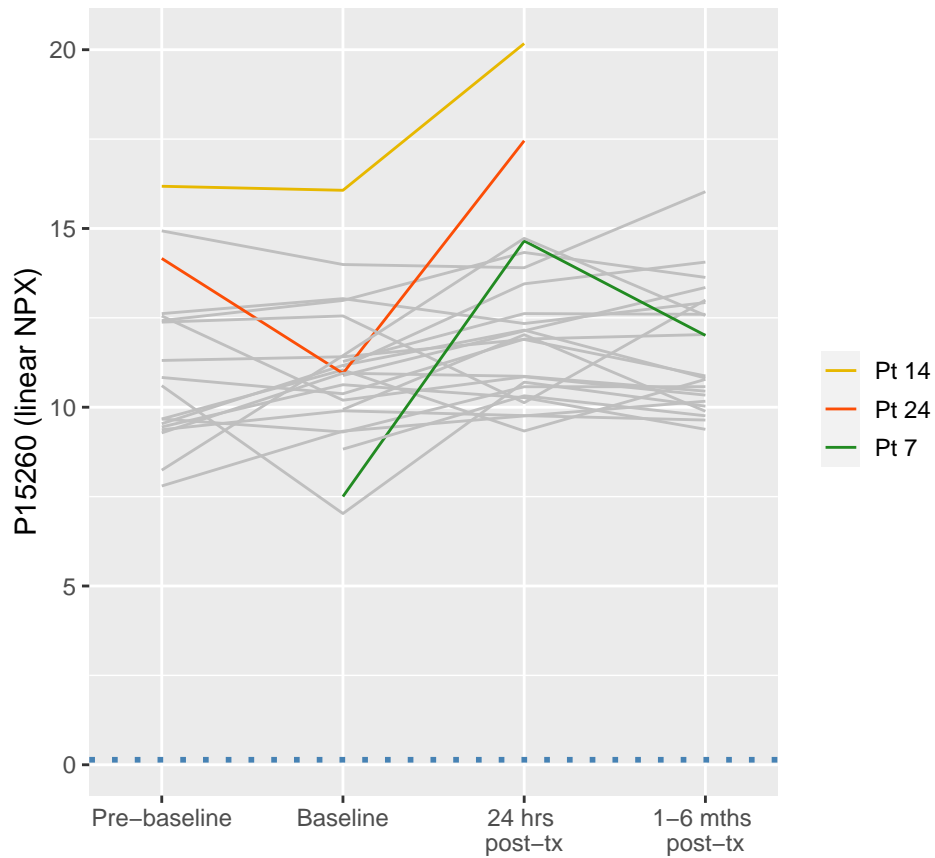

# Uniprot ID: P06756, analyte:ITGAV

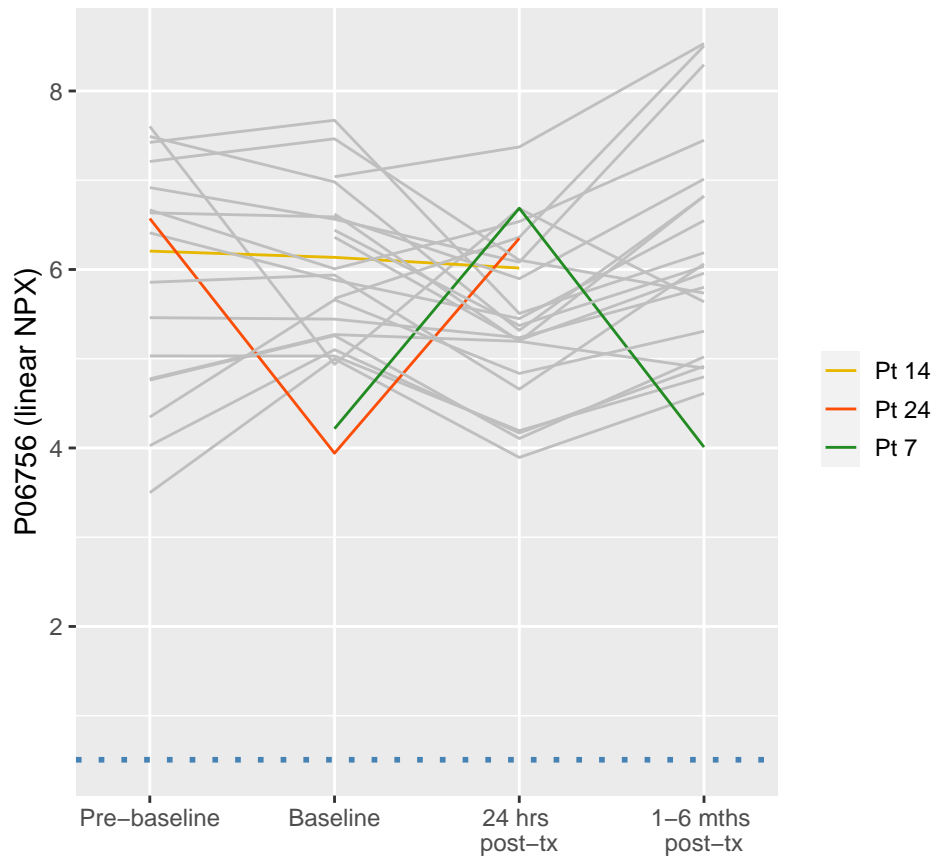

# Uniprot ID: P50591, analyte:TRAIL

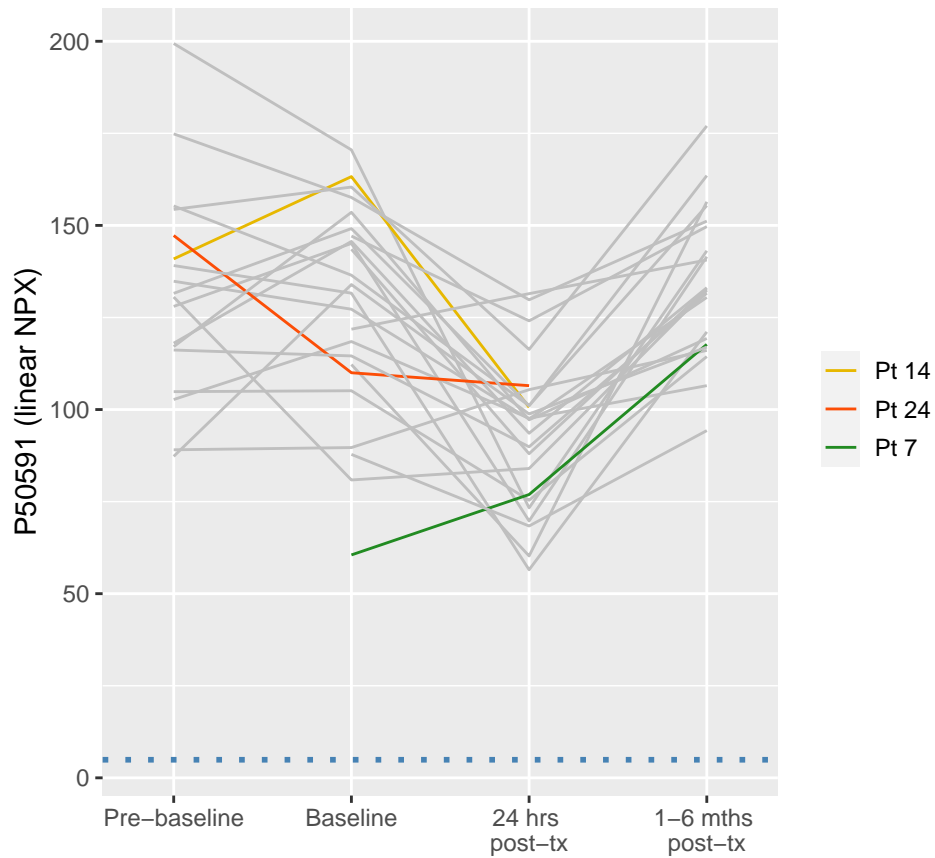

# Uniprot ID: Q9UBX7, analyte:hK11

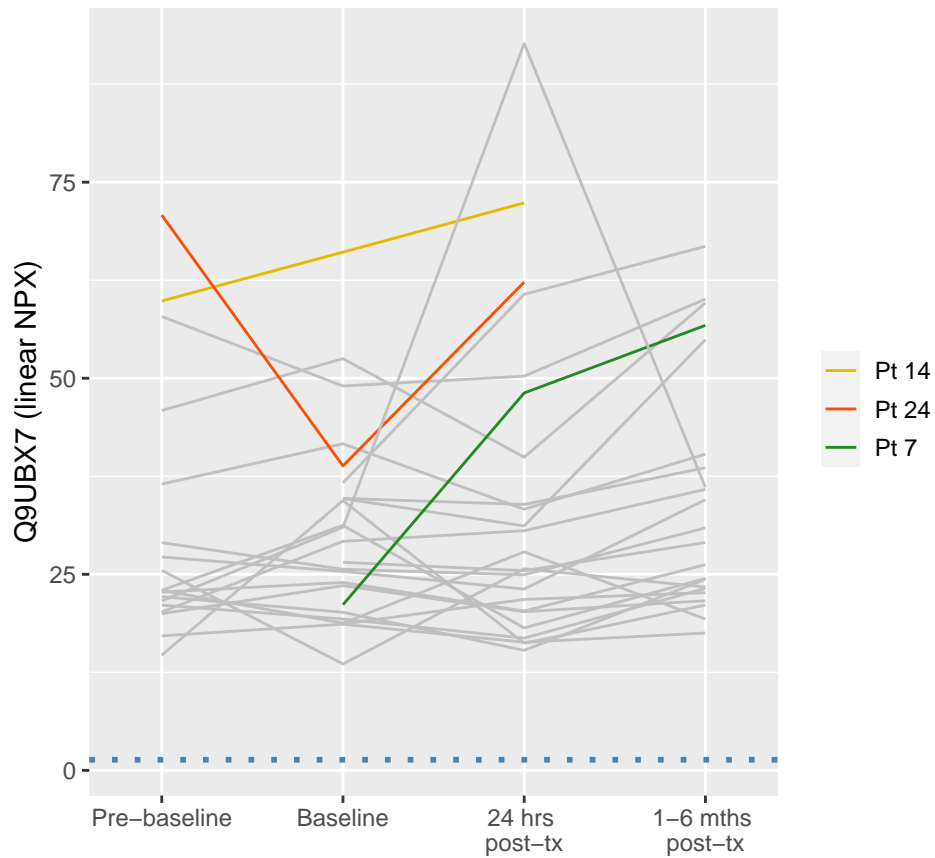

# Uniprot ID: P35052, analyte:GPC1

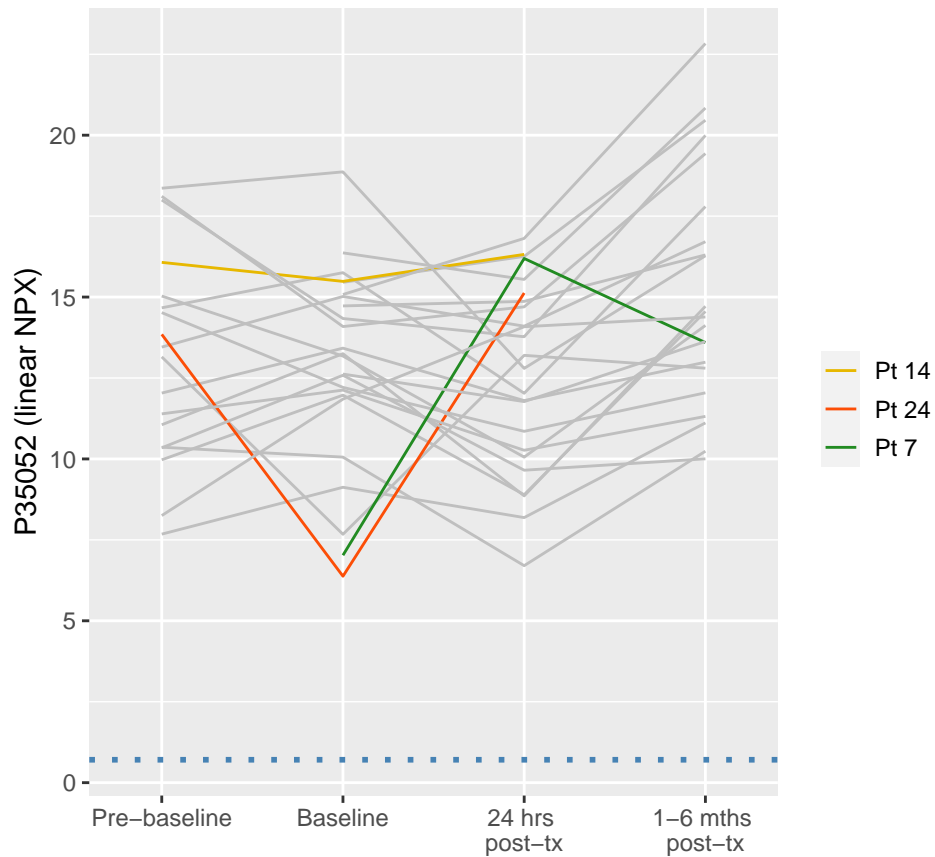

# Uniprot ID: P48307, analyte:TFPI-2

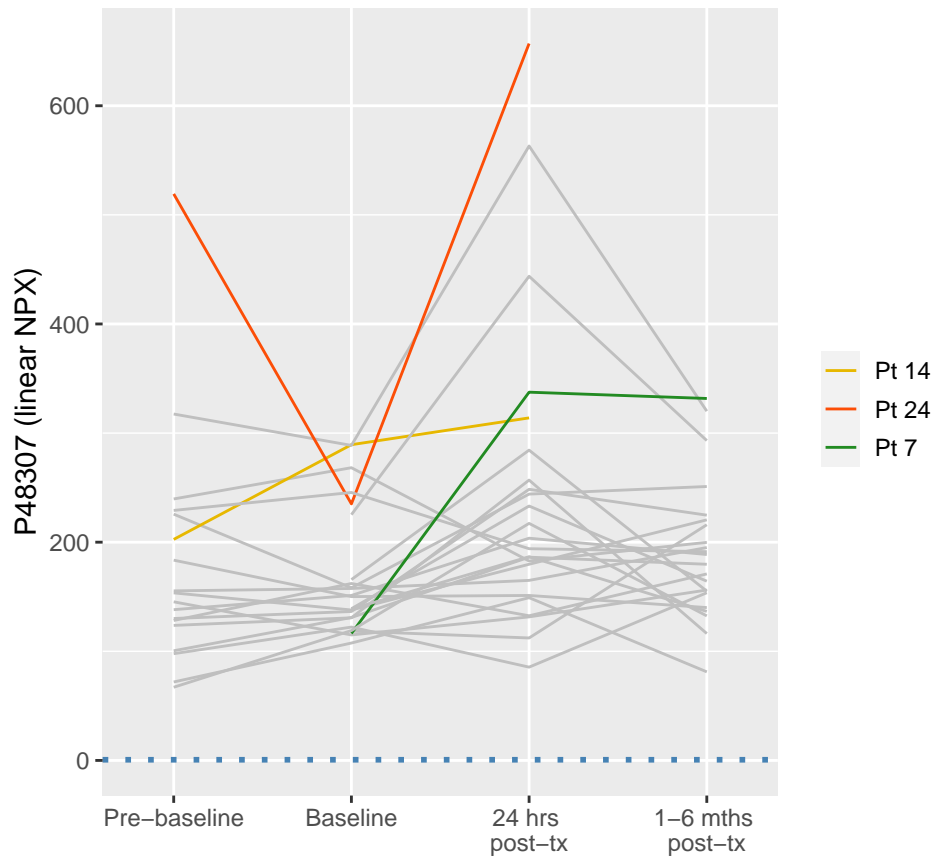

# Uniprot ID: O60259, analyte:hK8

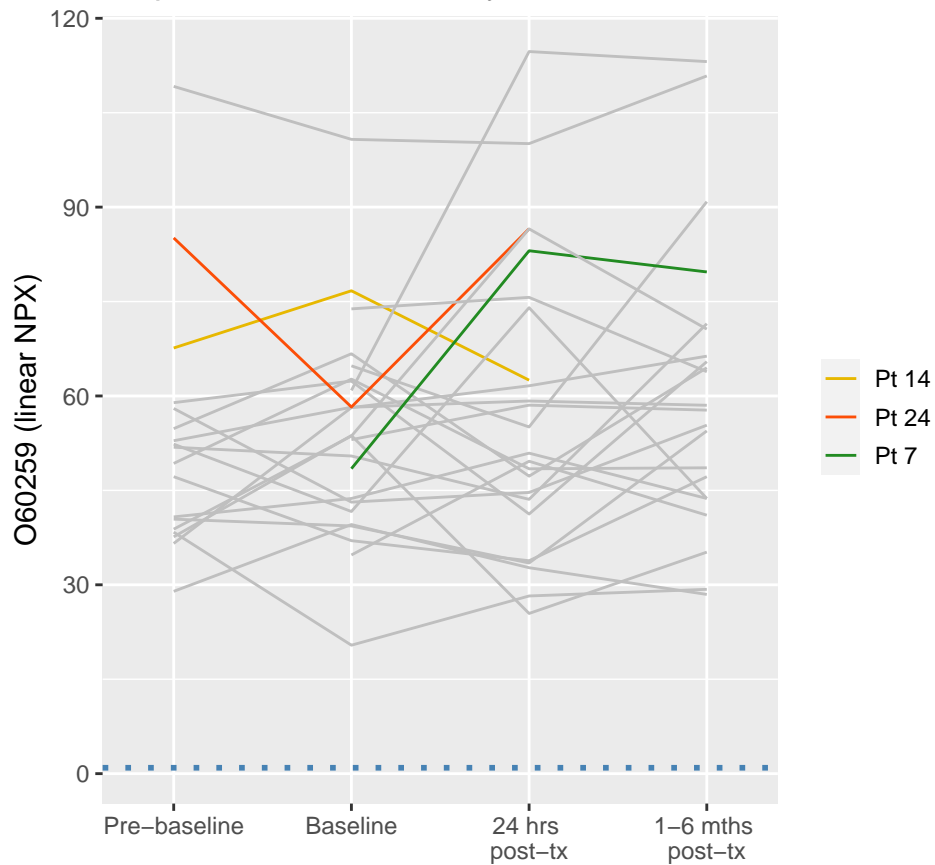

# Uniprot ID: P35968, analyte:VEGFR-2

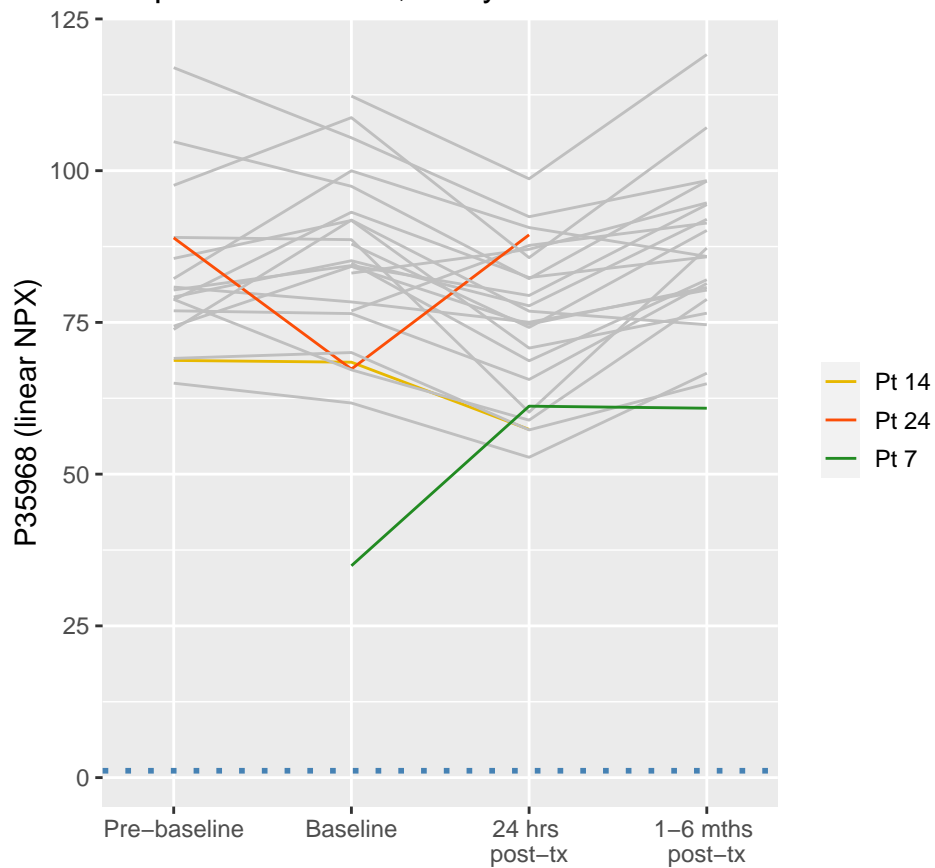



# Uniprot ID: O95274, analyte:LYPD3

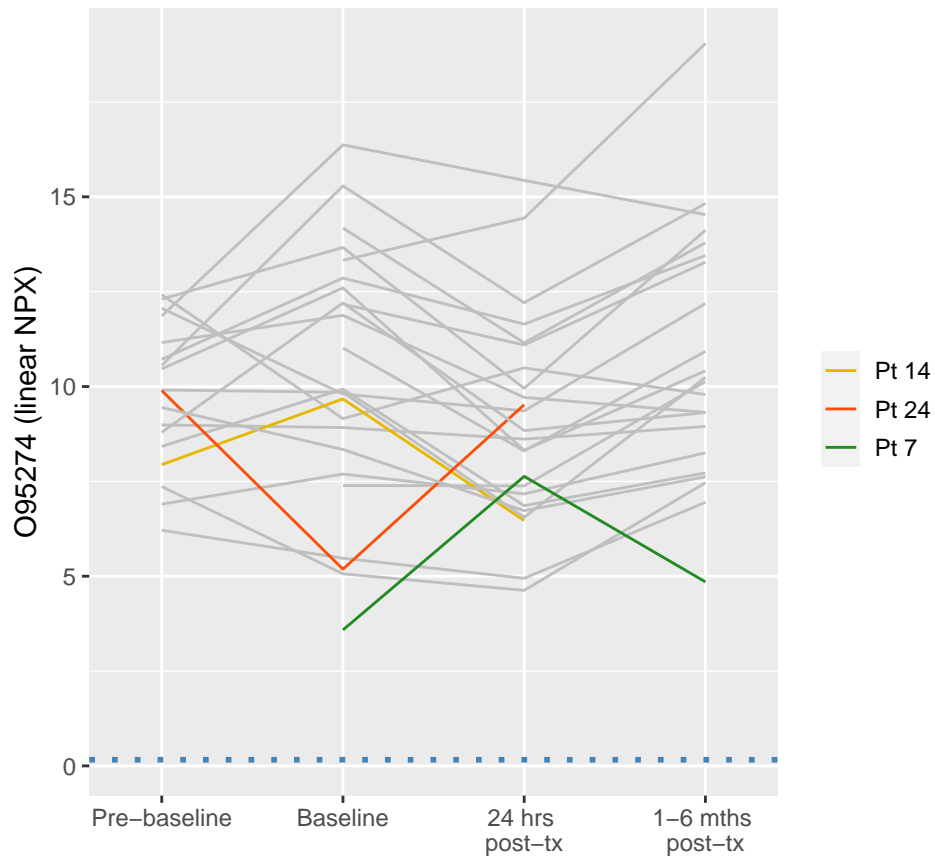

# Uniprot ID: O00592, analyte:PODXL

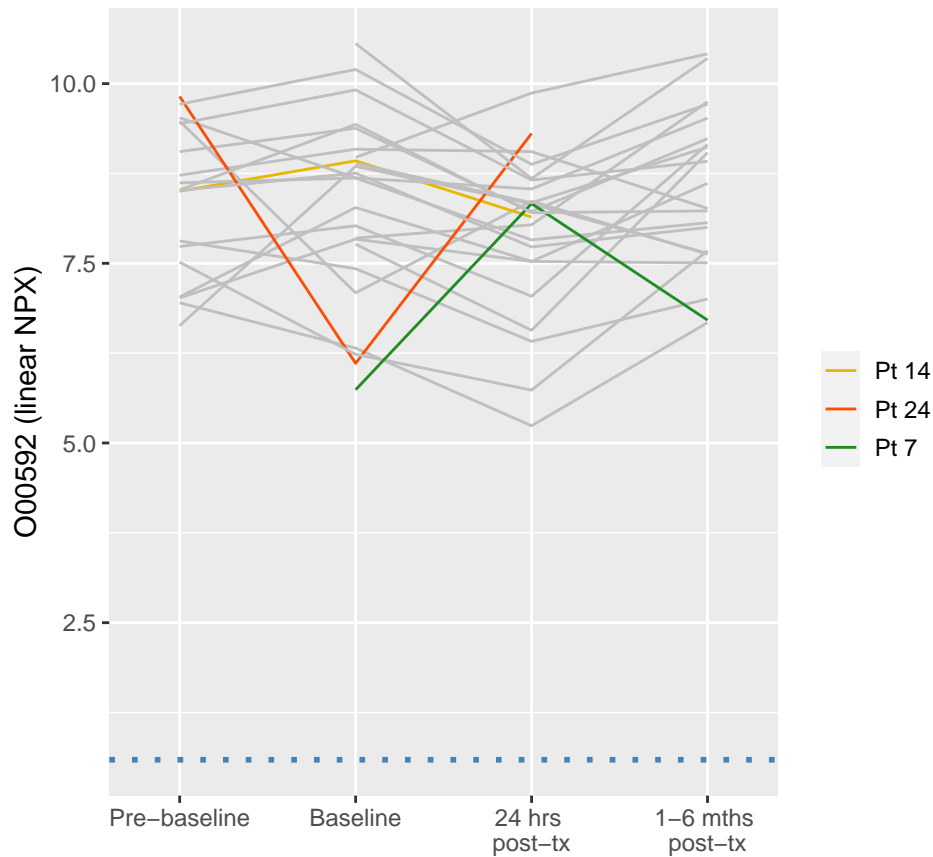

# Uniprot ID: P26447, analyte:S100A4

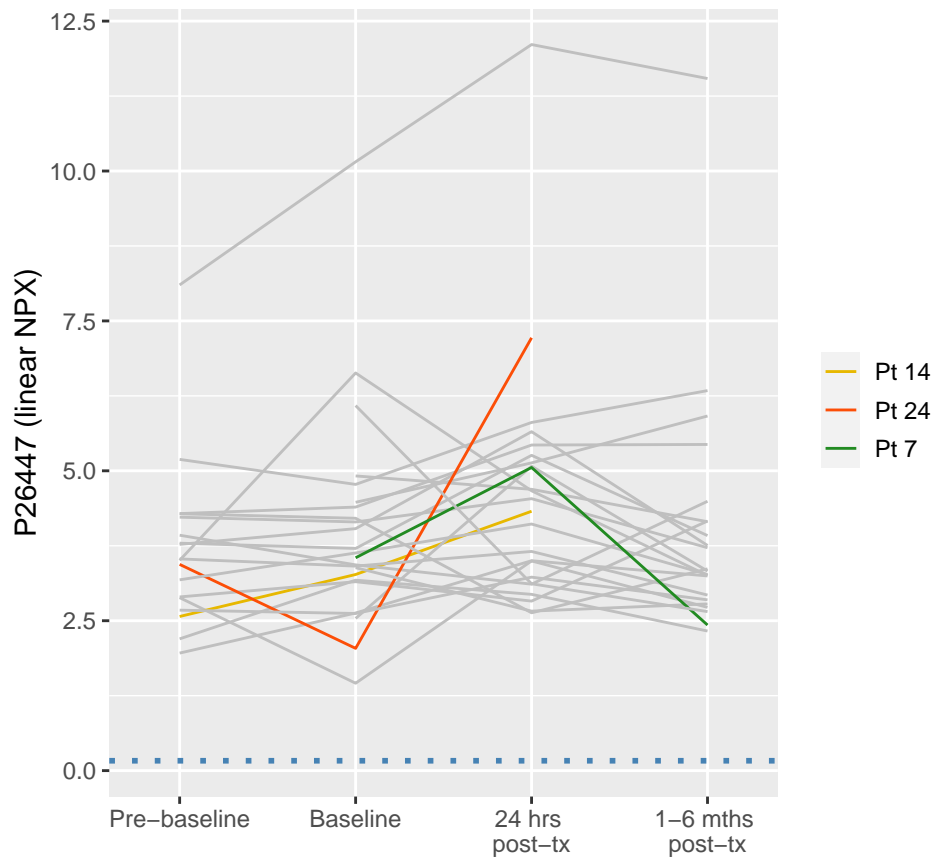

# Uniprot ID: P08069, analyte:IGF1R

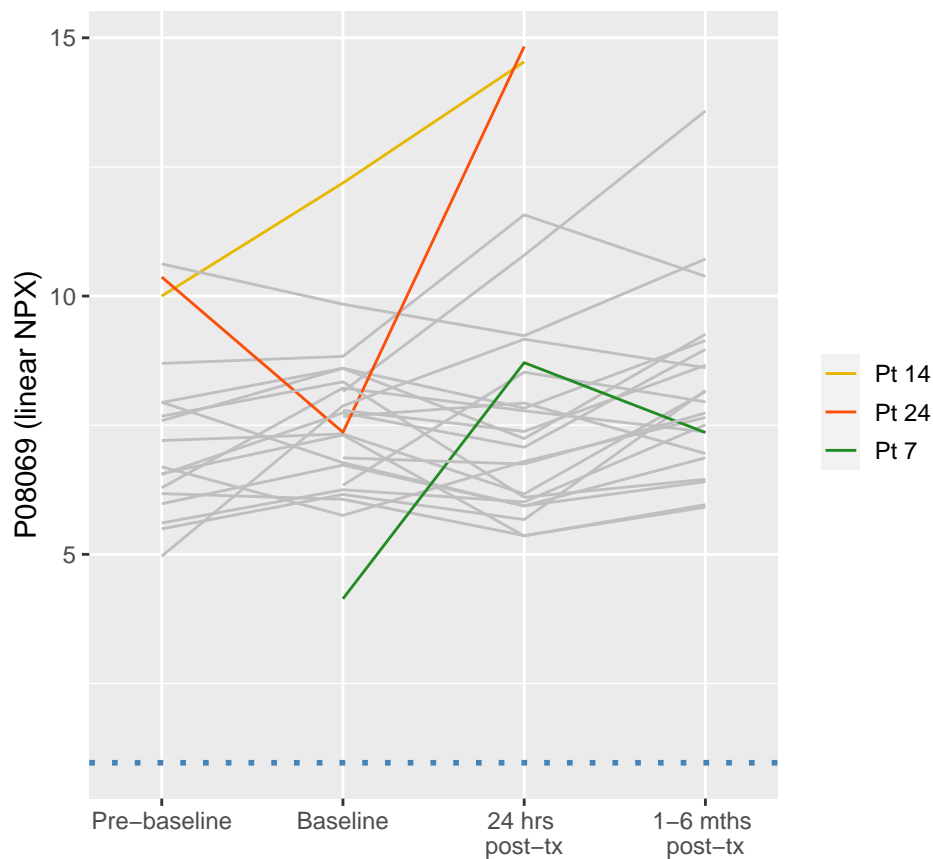

# Uniprot ID: P04626, analyte:ERBB2

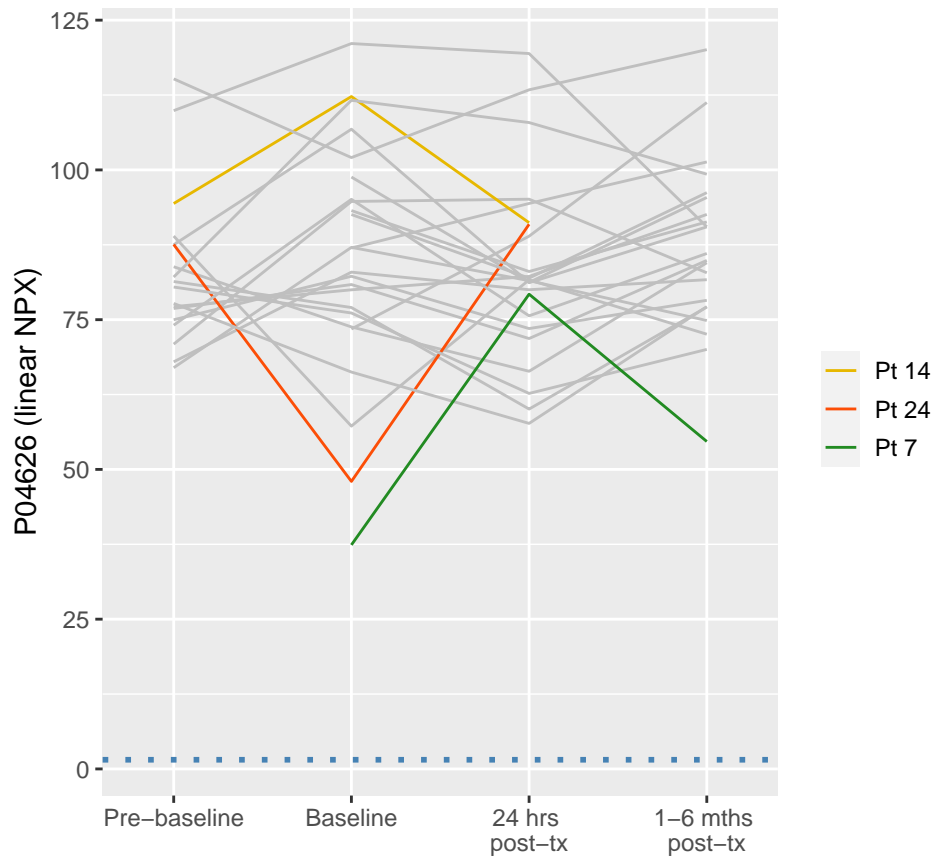

# Uniprot ID: P21860, analyte:ERBB3

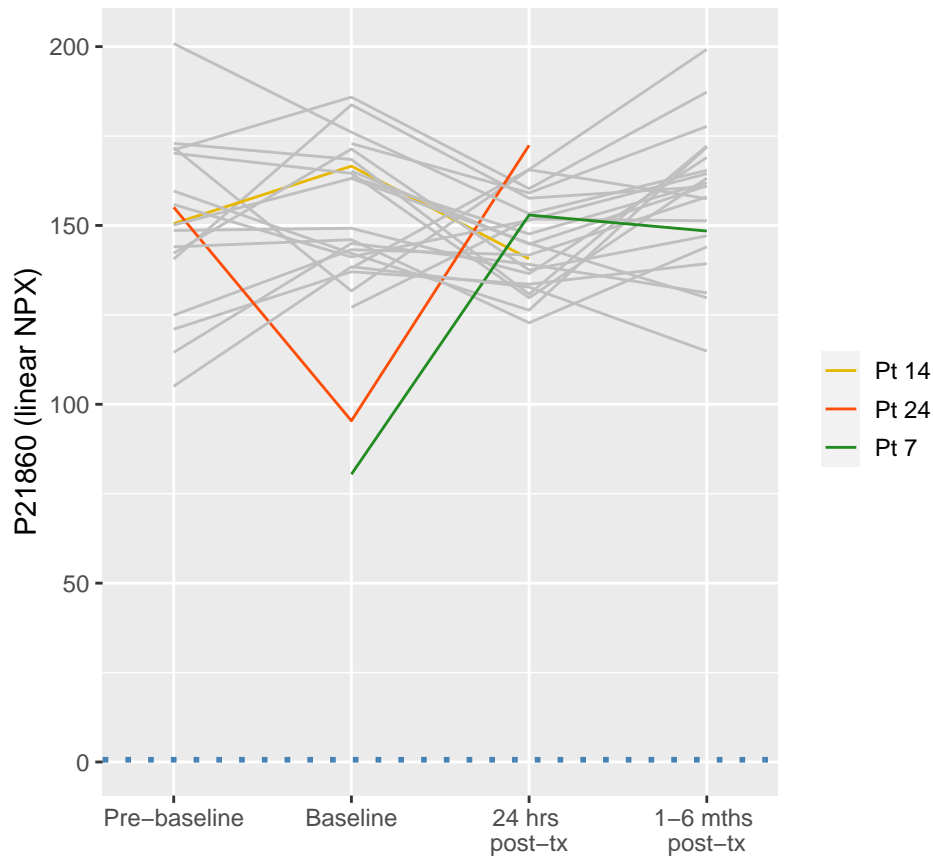

# Uniprot ID: P21583, analyte:SCF

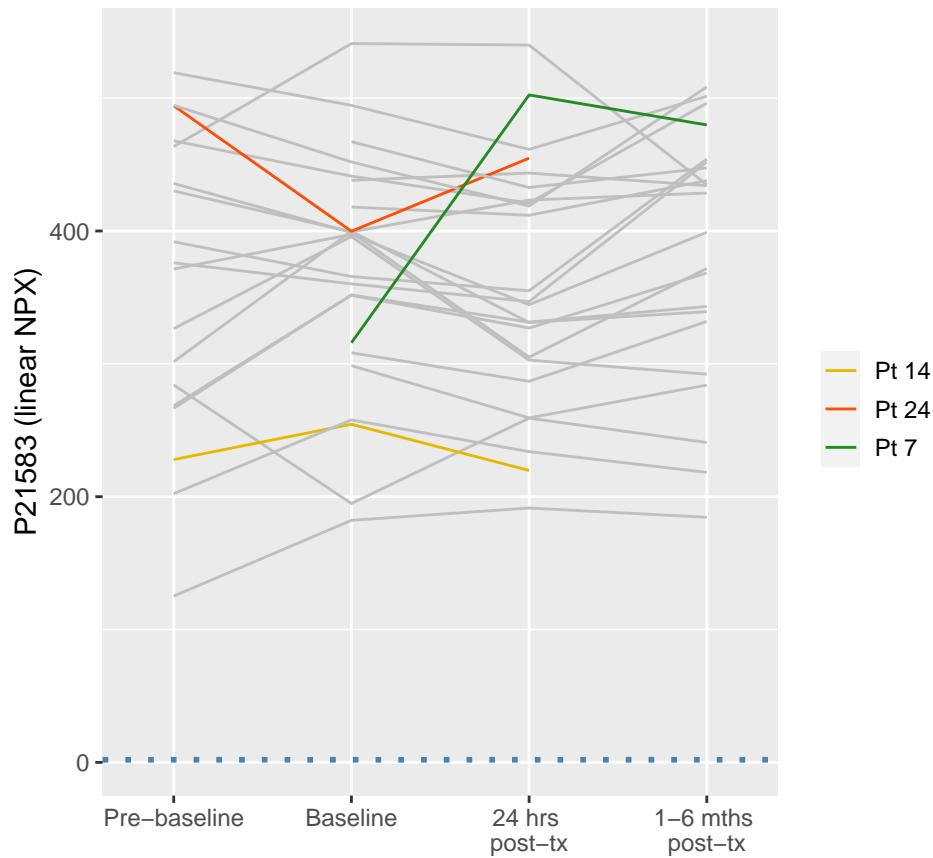

# Uniprot ID: P09486, analyte:SPARC

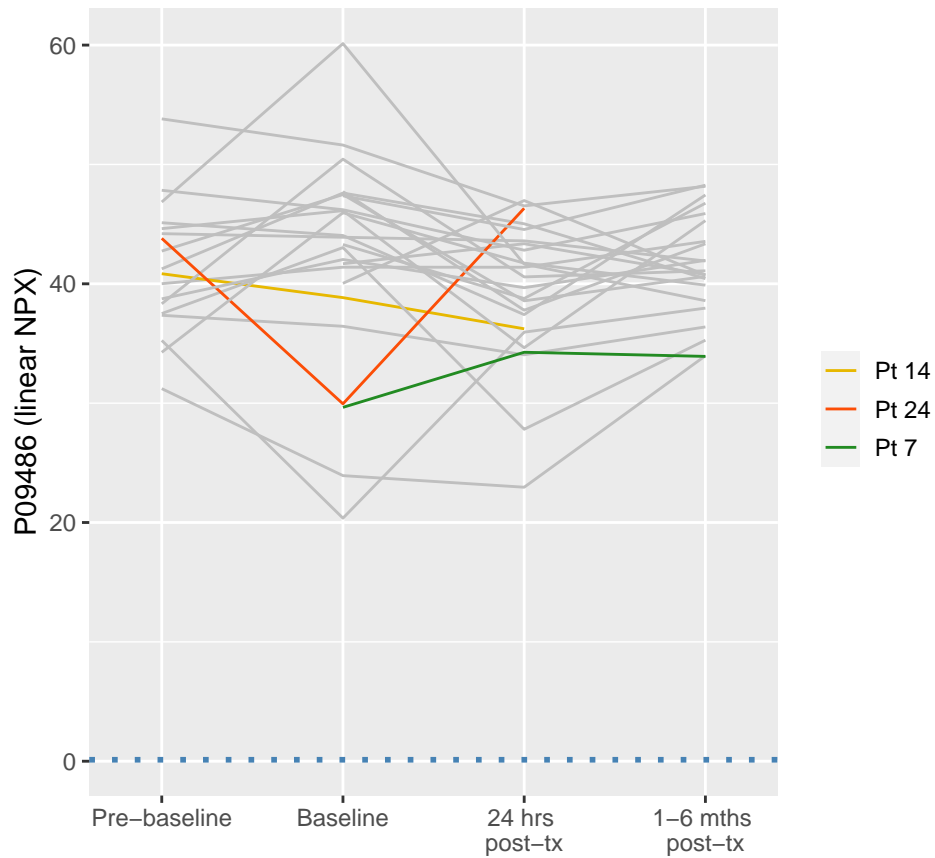



# Uniprot ID: P20718, analyte:GZMH

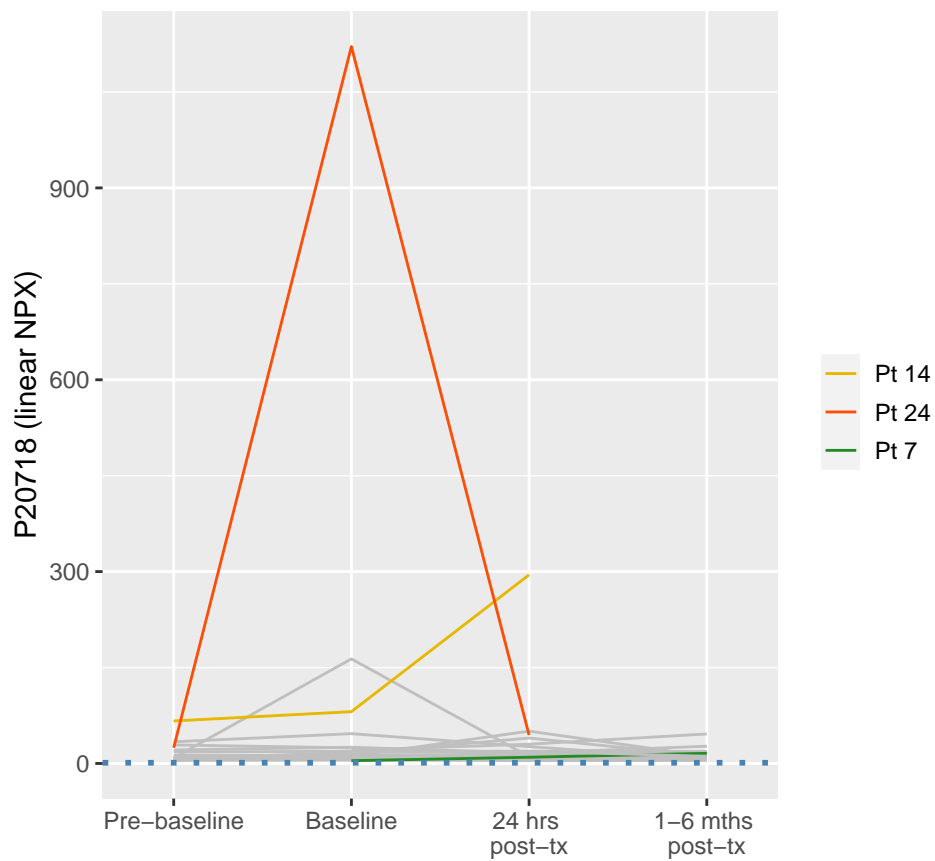

# Uniprot ID: P01135, analyte:TGF- $\alpha$

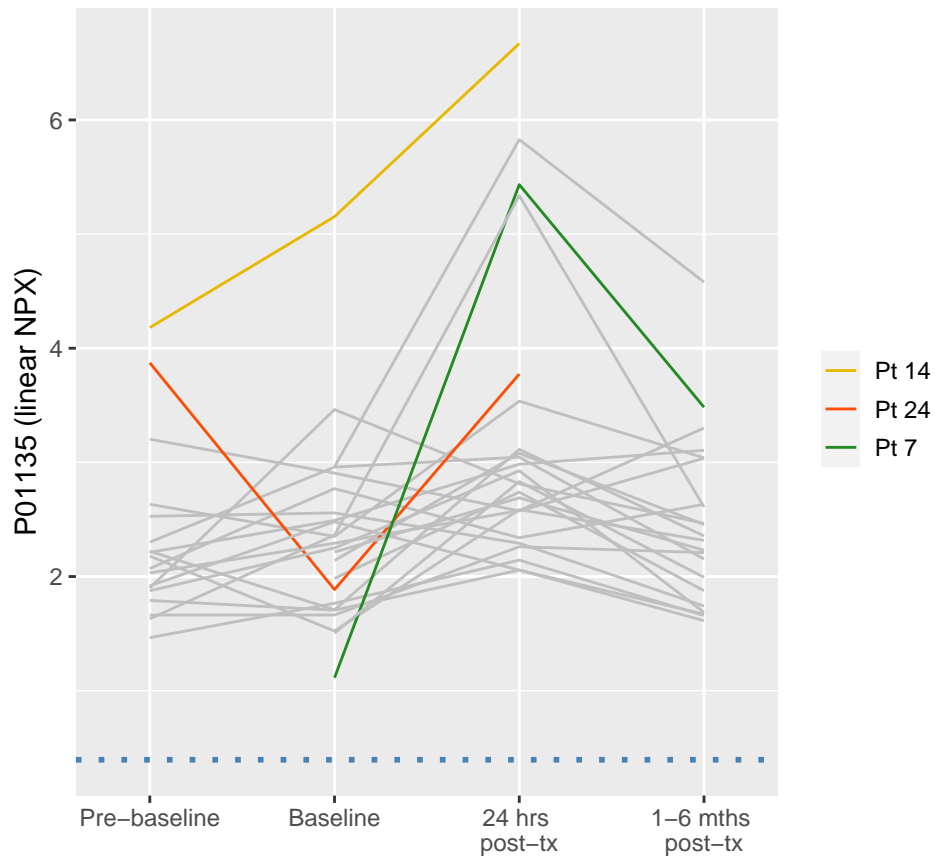

# Uniprot ID: P09958, analyte:FURIN

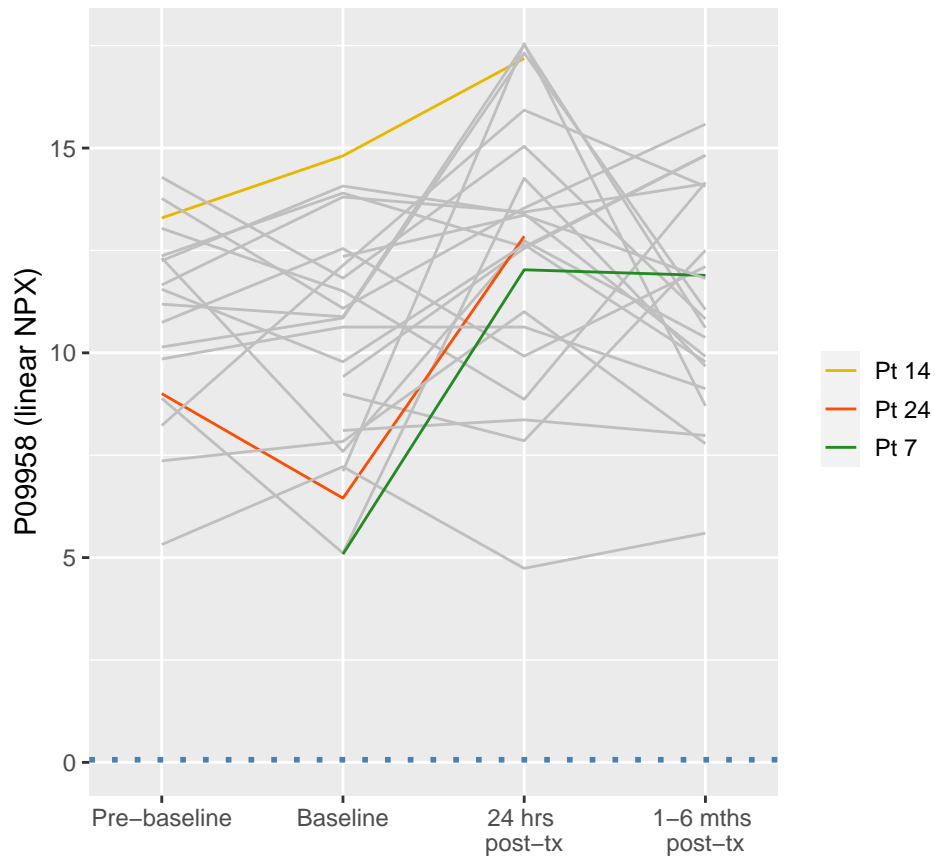

# Uniprot ID: O00622, analyte:CYR61

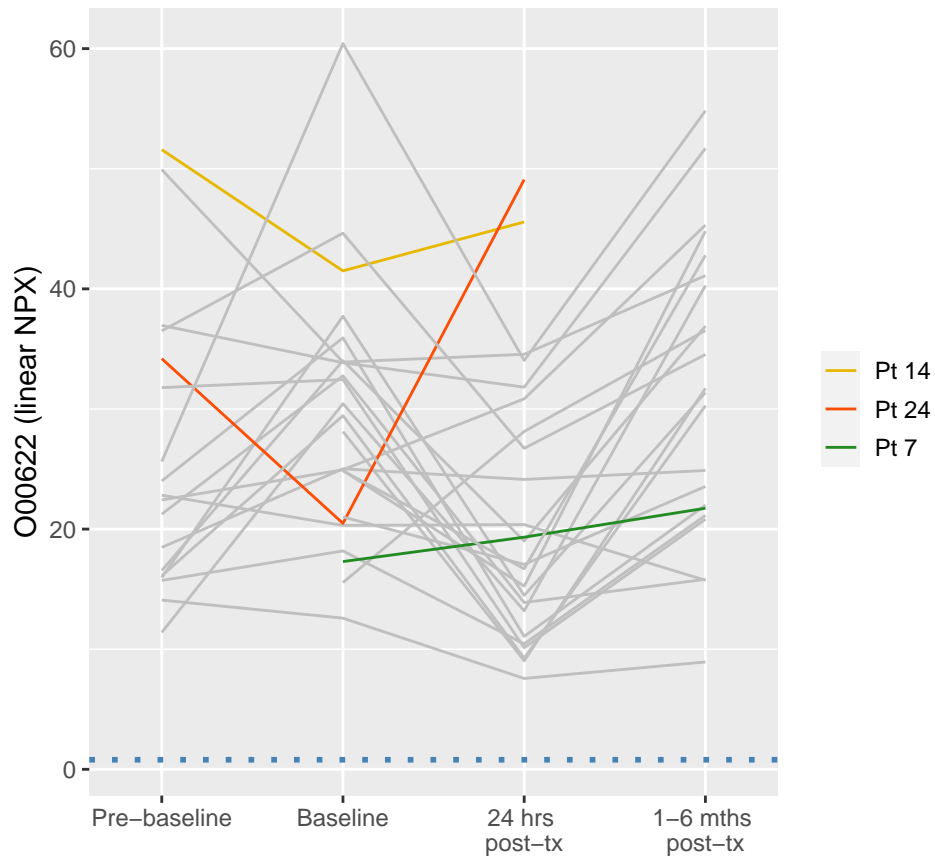

# Uniprot ID: Q9P0G3, analyte:hK14

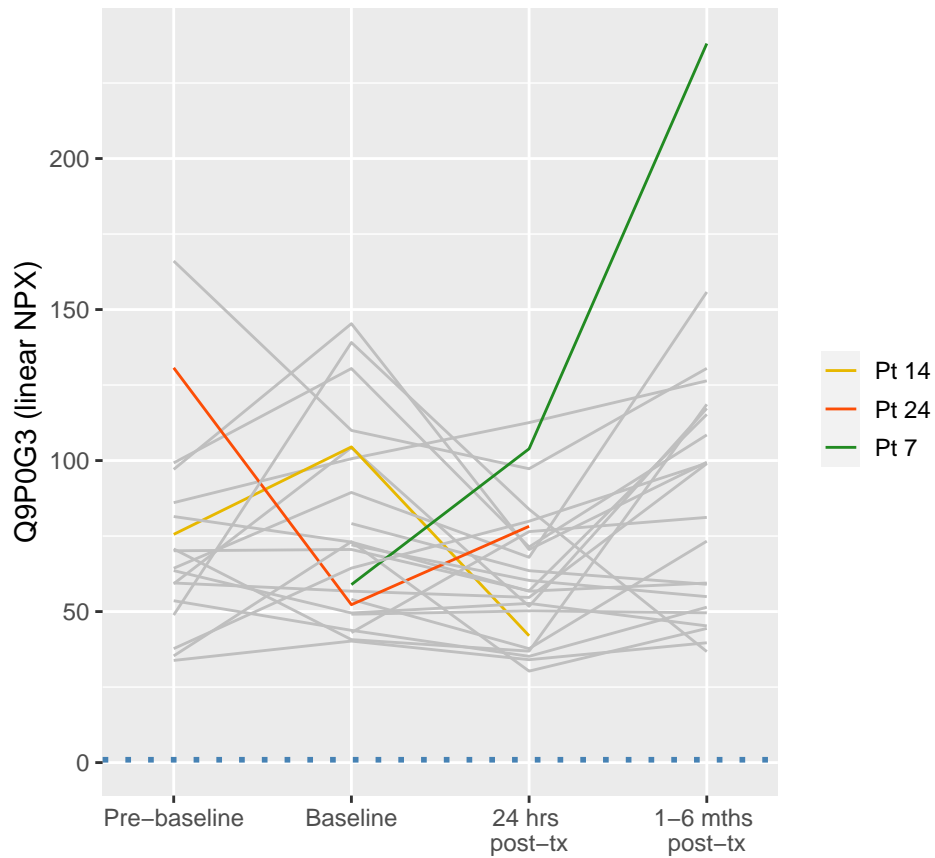

# Uniprot ID: Q13158, analyte:FADD

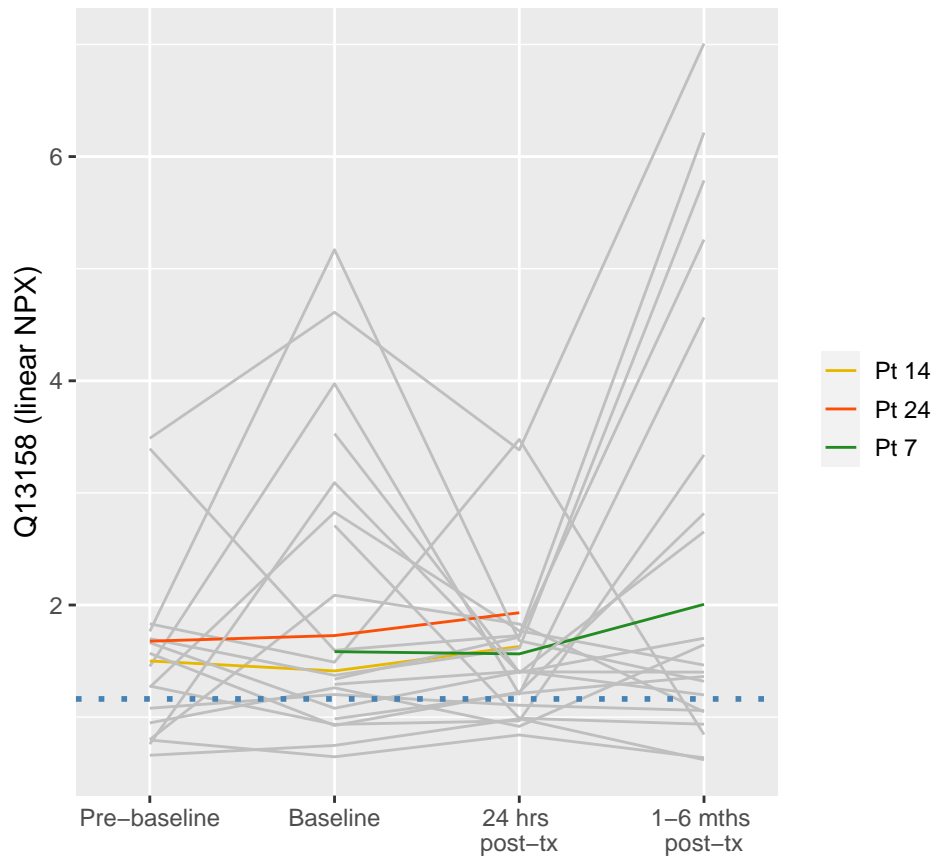

# Uniprot ID: P50579, analyte:MetAP 2

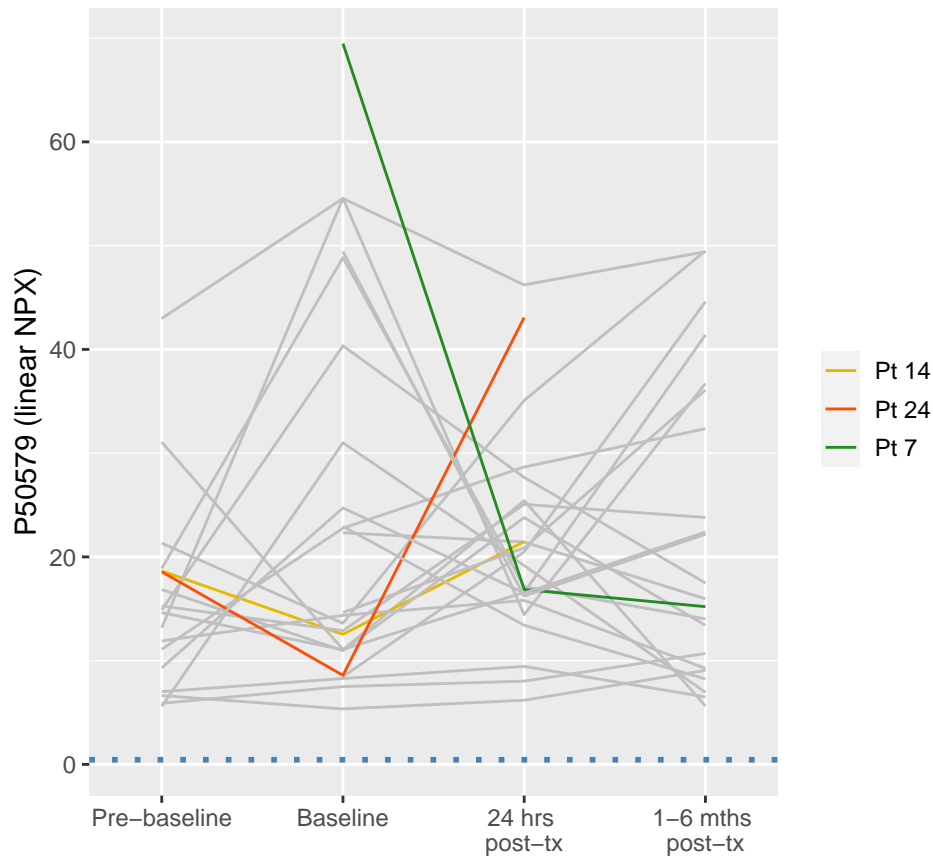

# Uniprot ID: Q96NY8, analyte:PVRL4

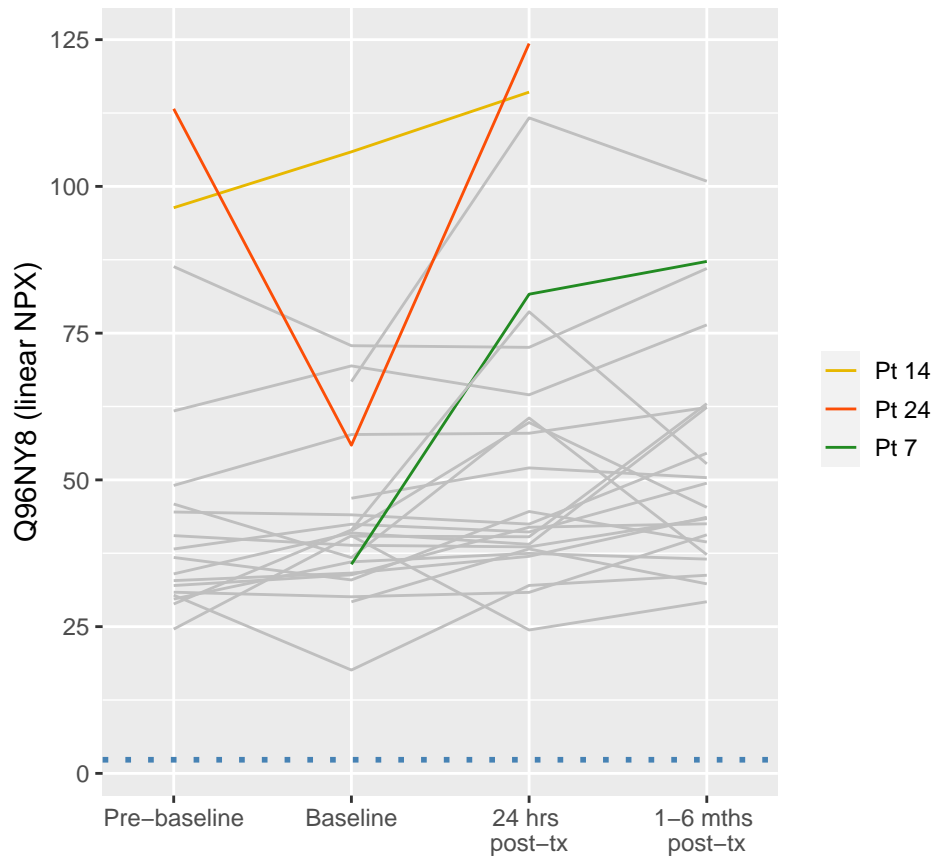



# Uniprot ID: P48023, analyte:FASLG

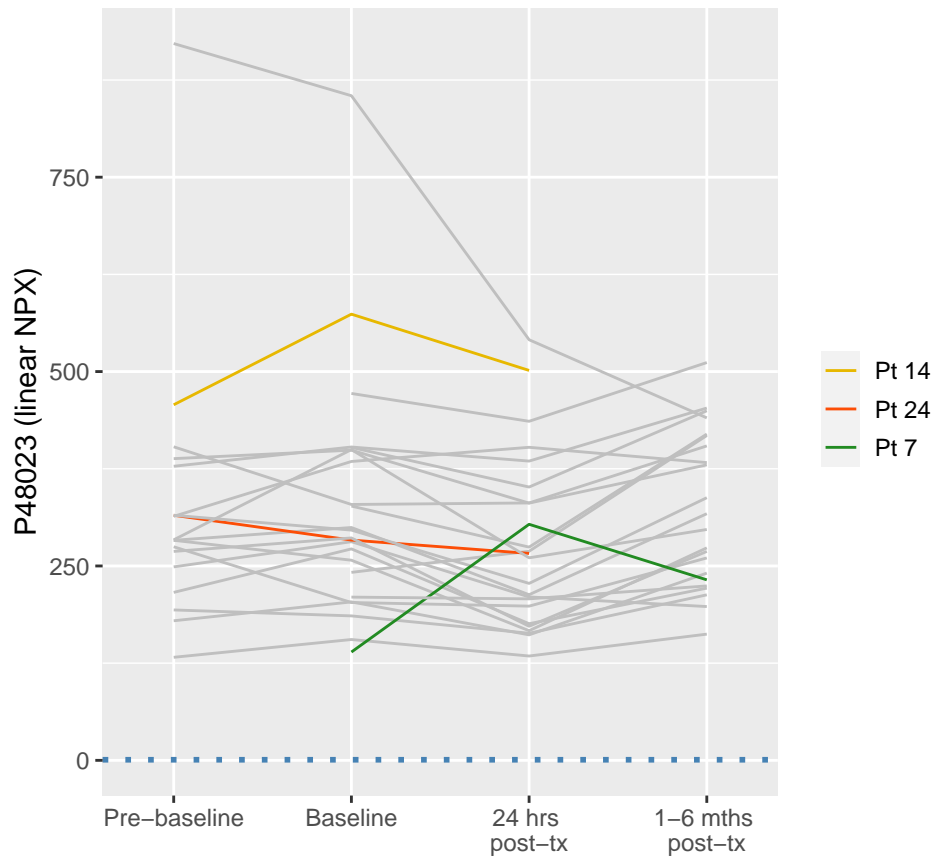

# Uniprot ID: P29317, analyte:EPHA2

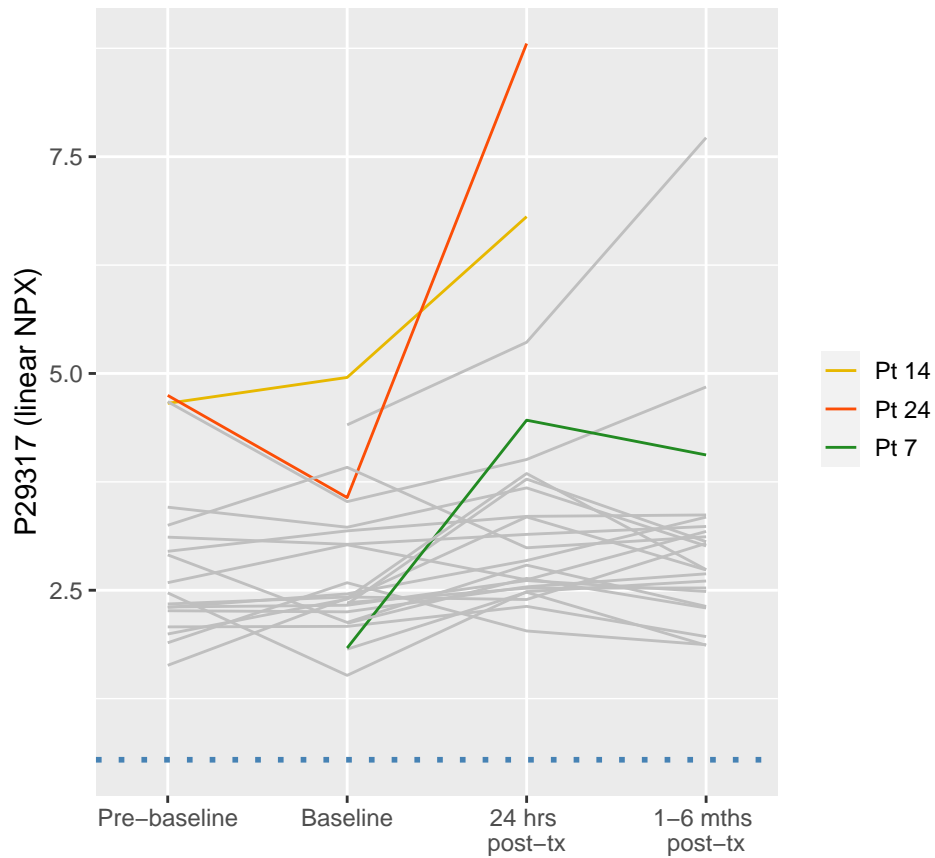

# Uniprot ID: P18084, analyte:ITGB5

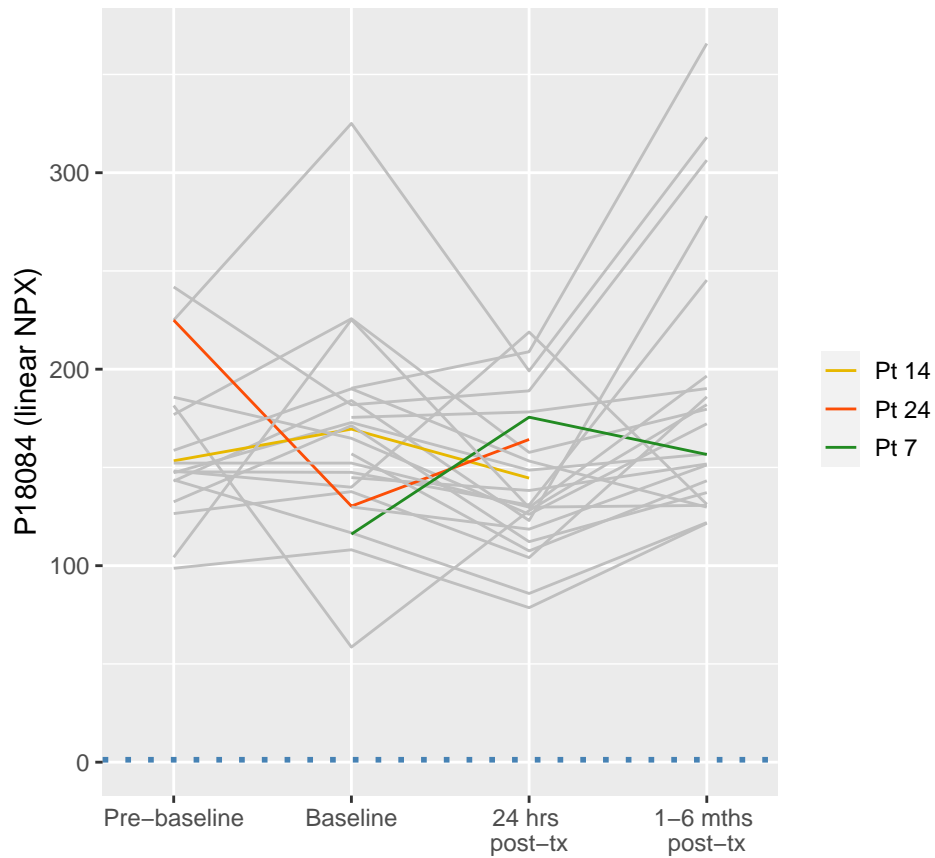

# Uniprot ID: P09382, analyte:Gal-1

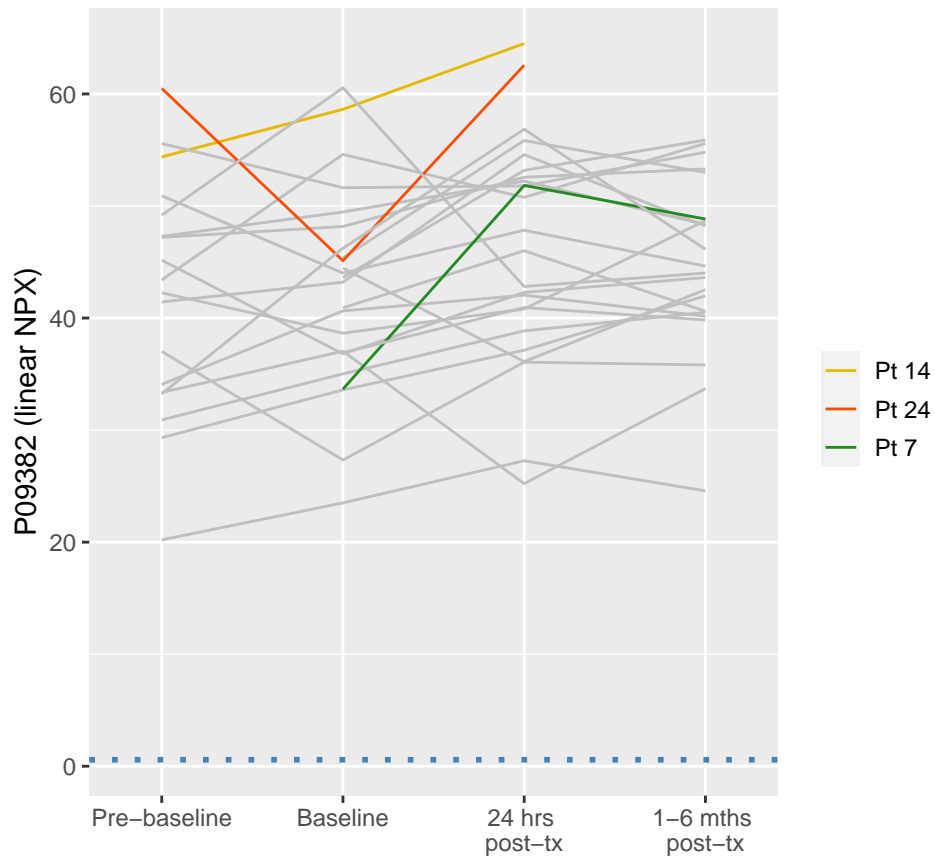

# Uniprot ID: Q9BYH1, analyte:SEZ6L

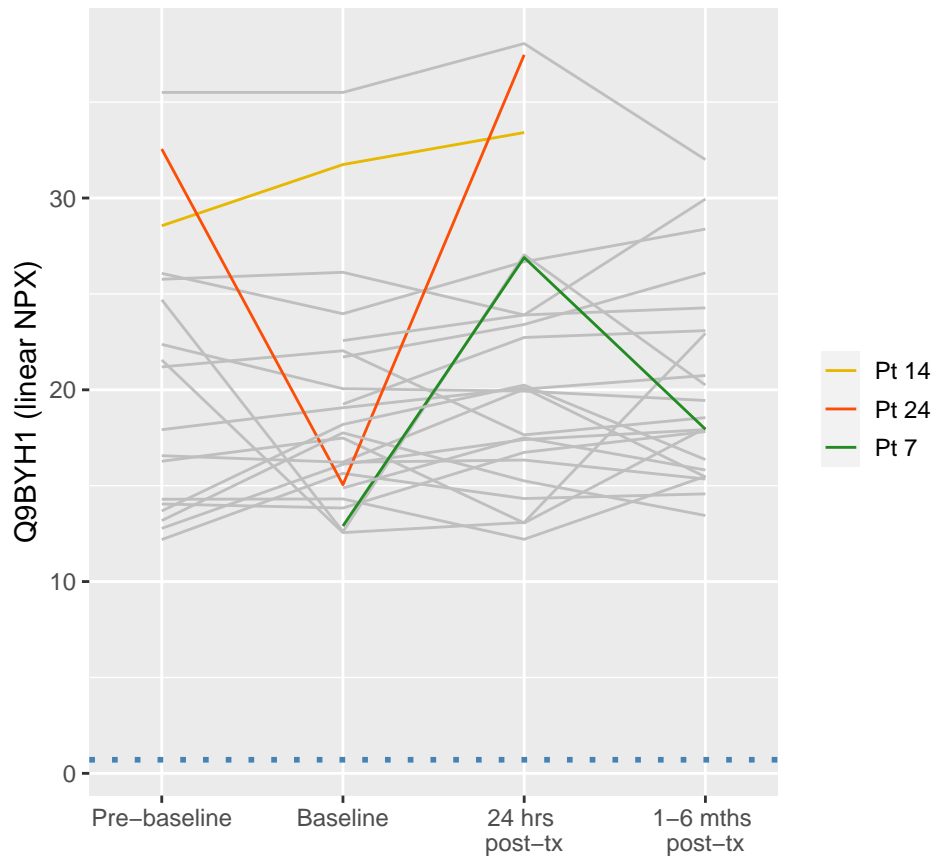

# Uniprot ID: Q14956, analyte:GPNMB

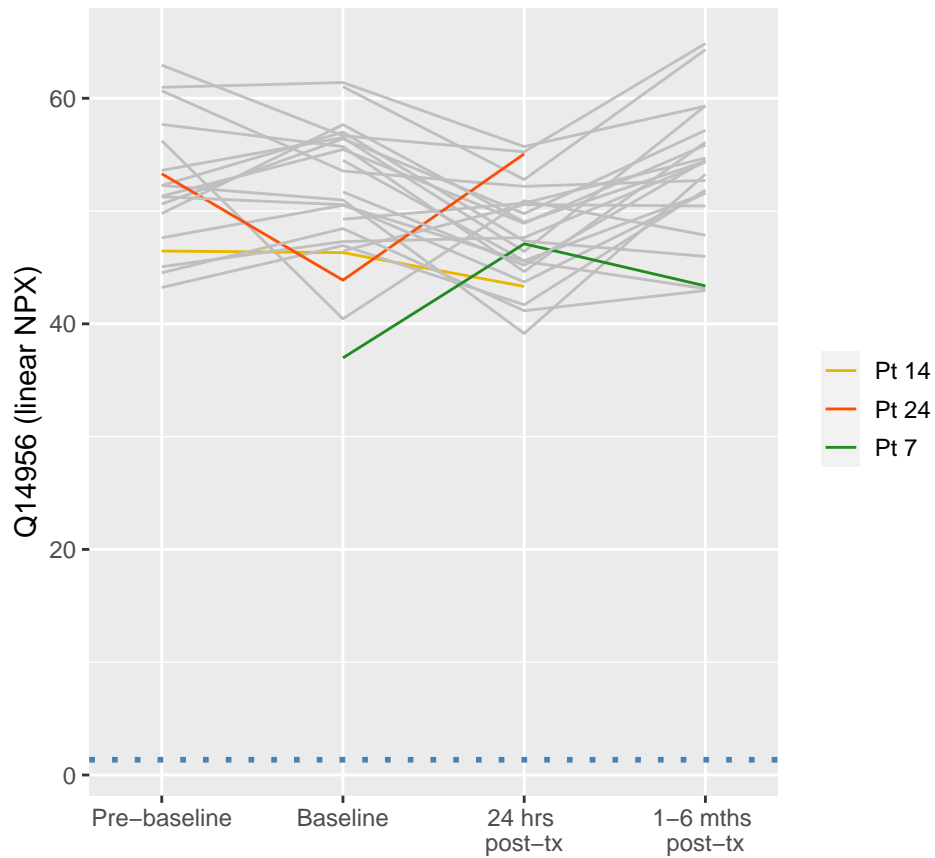

# Uniprot ID: Q16790, analyte:CAIX

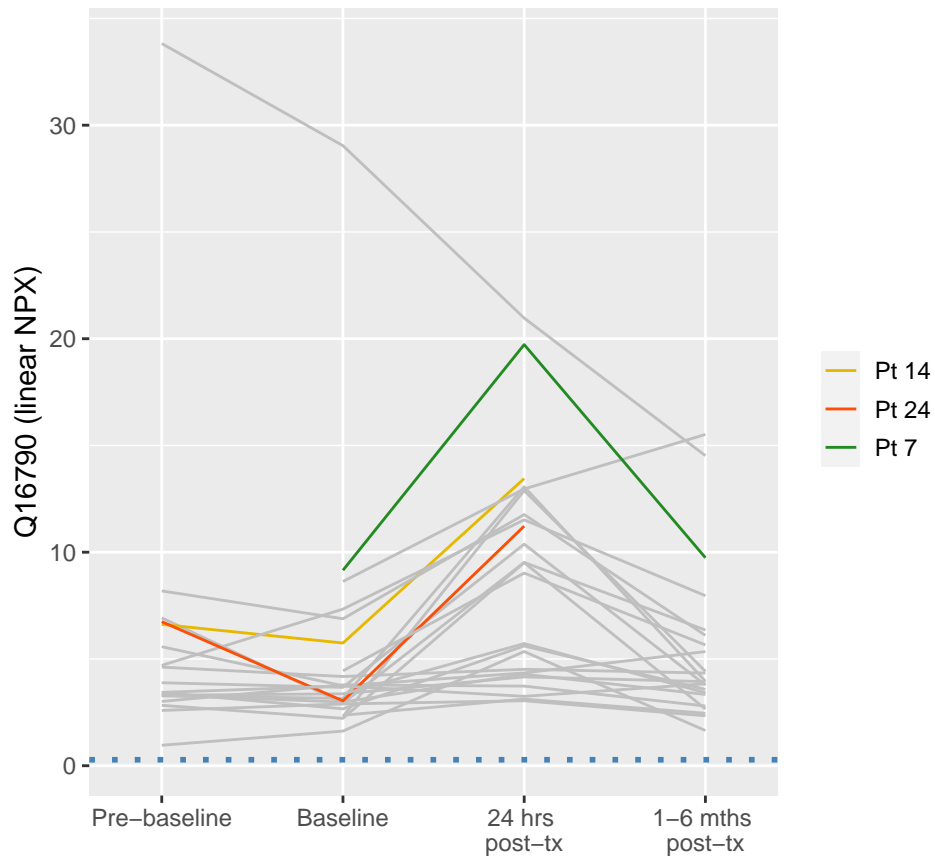

# Uniprot ID: Q16674, analyte:MIA

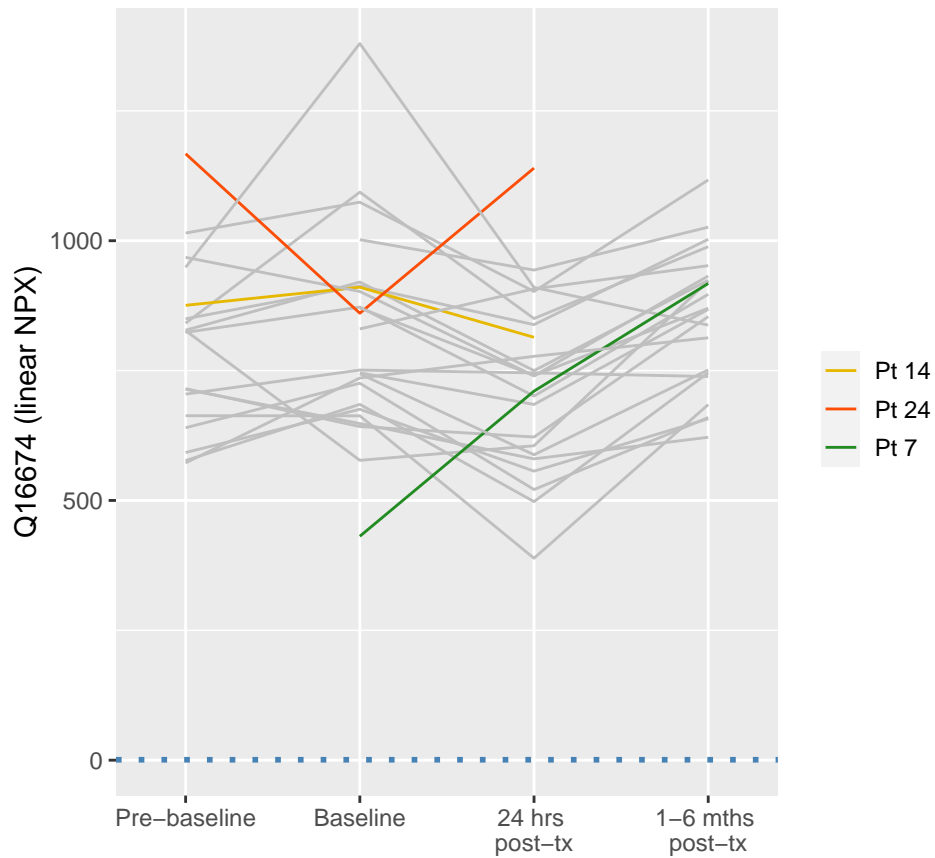



# Uniprot ID: O60911, analyte:CTSV

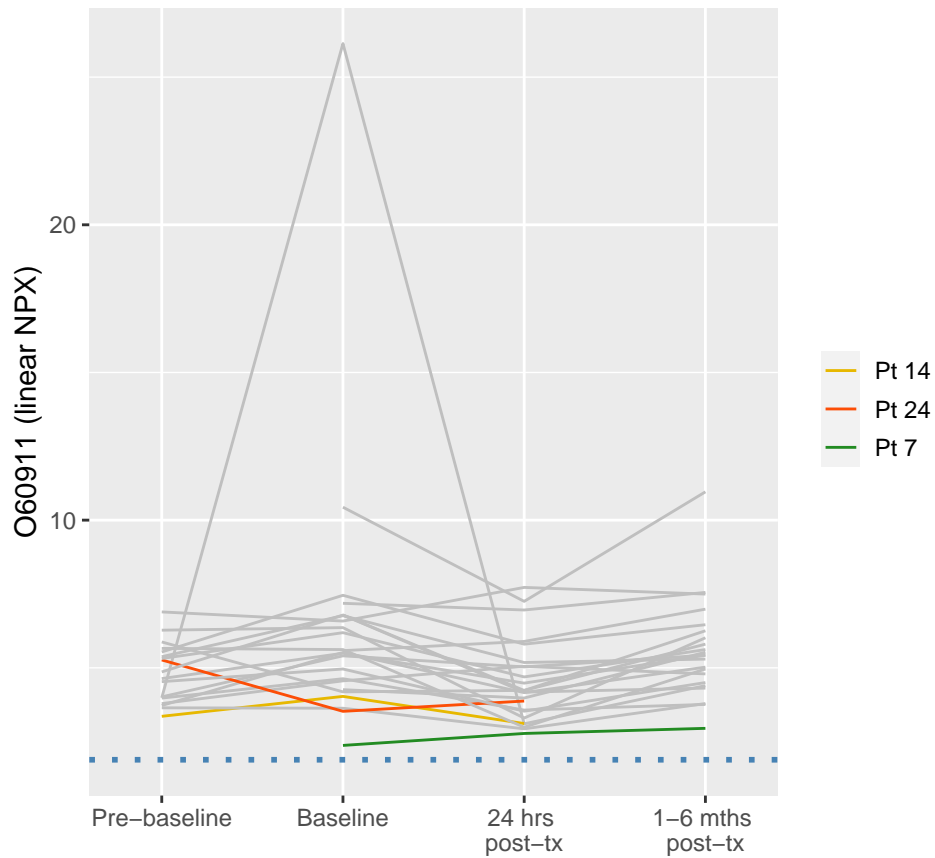

# Uniprot ID: P26842, analyte:CD27

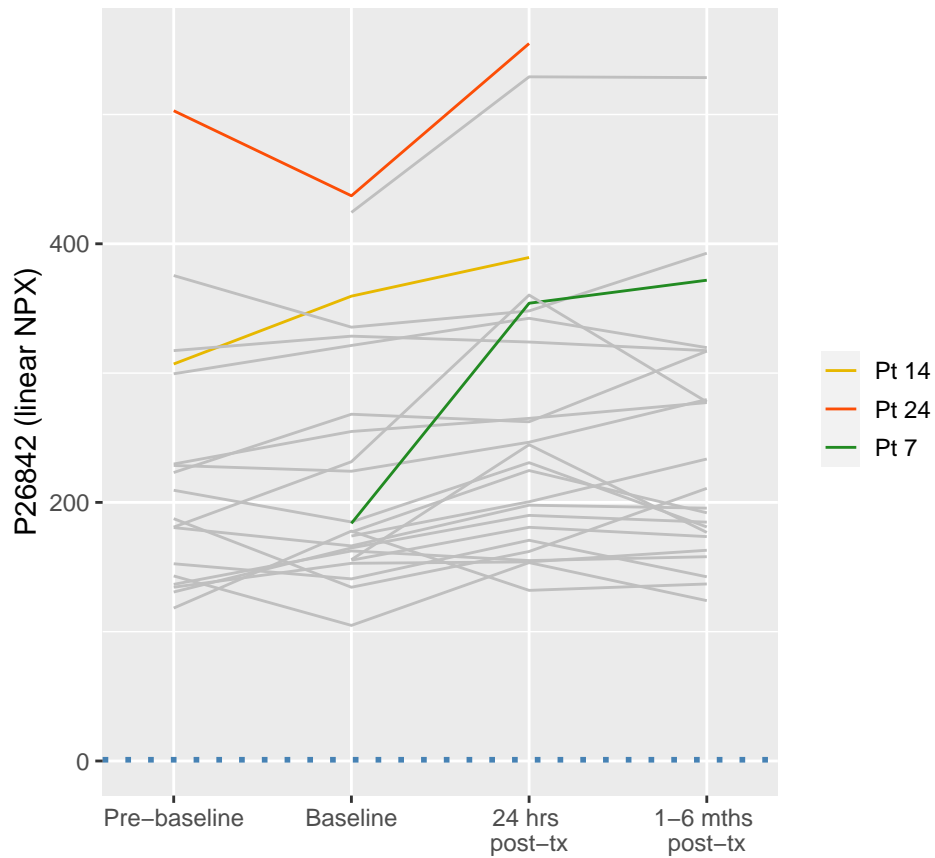

# Uniprot ID: O43895, analyte: XPNPEP2

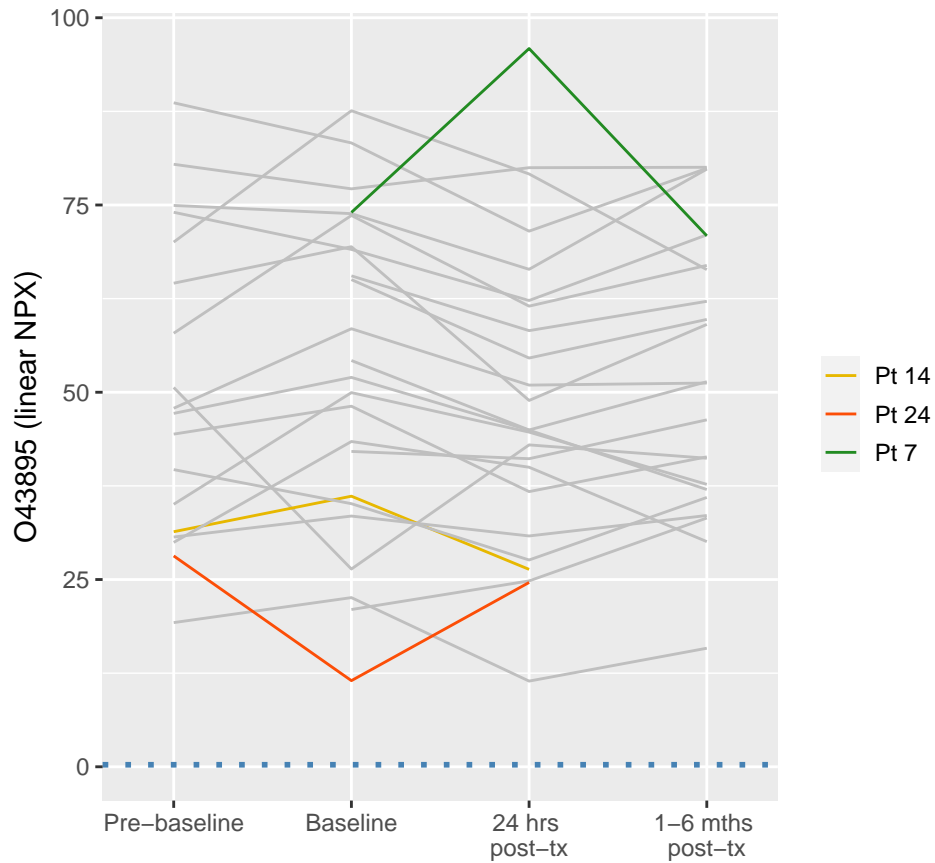

# Uniprot ID: Q15303, analyte:ERBB4

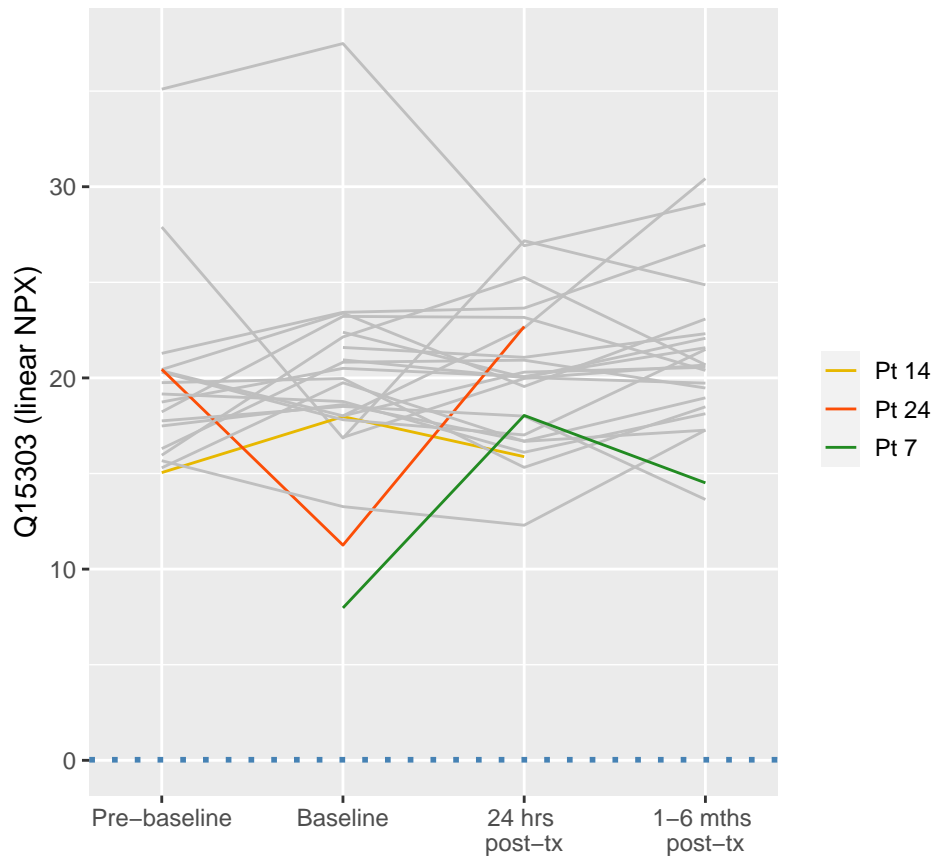

# Uniprot ID: P14210, analyte:HGF

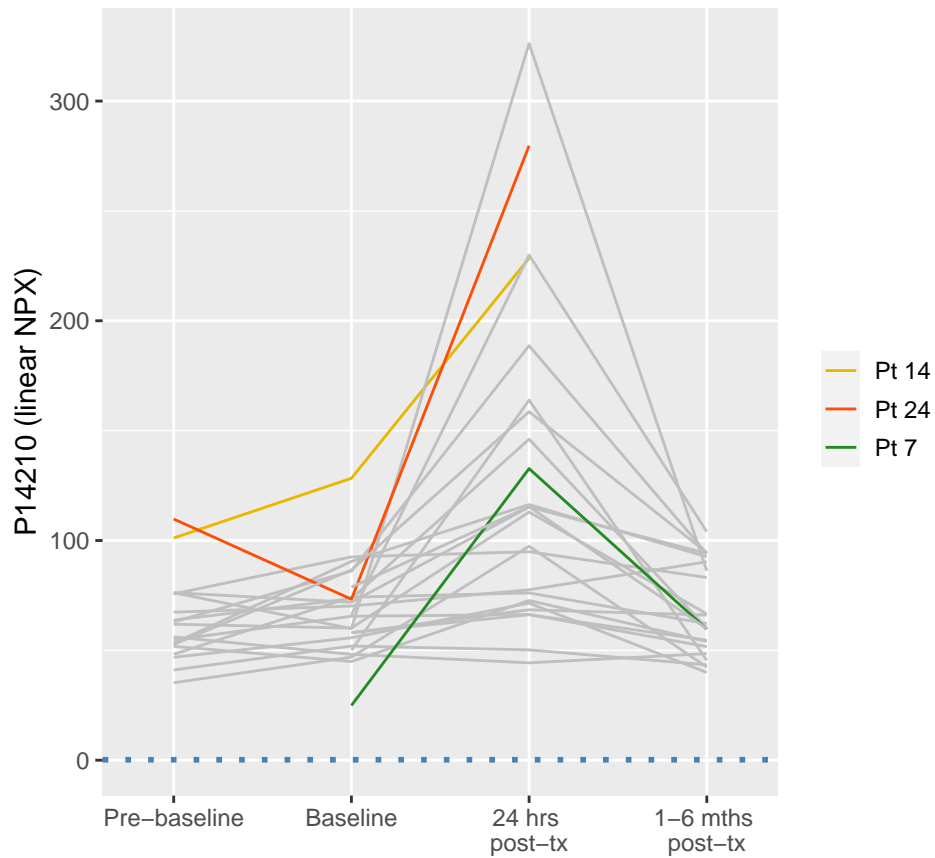

# Uniprot ID: P78325, analyte:ADAM 8

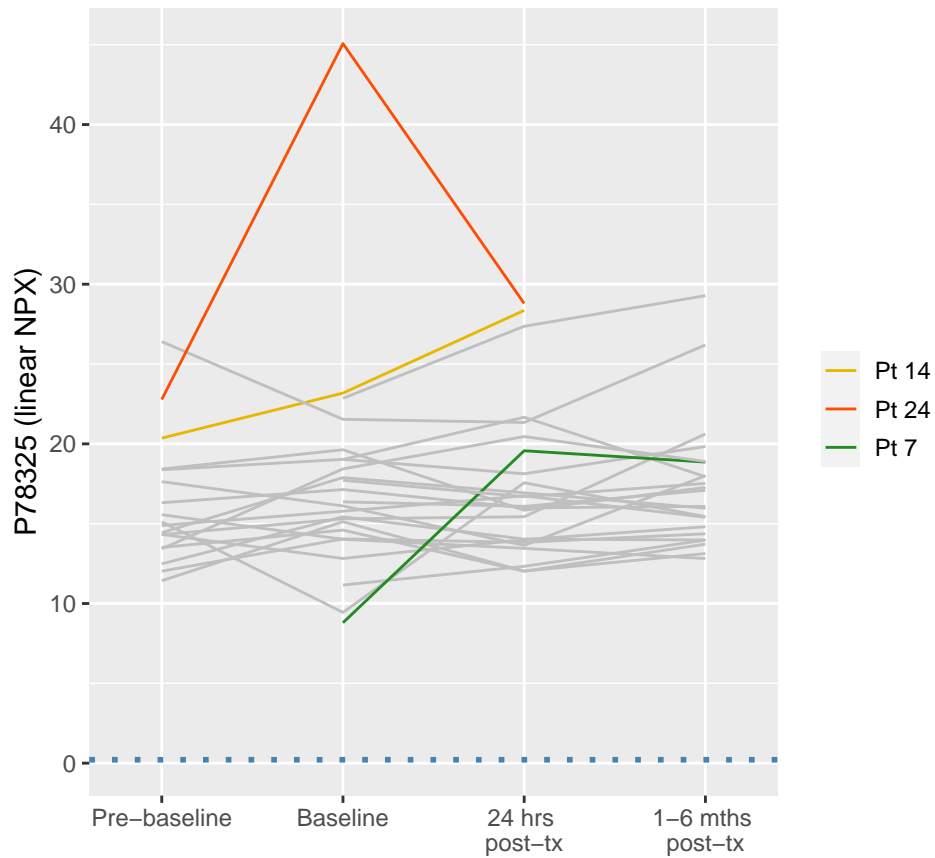

# Uniprot ID: P21589, analyte:5'-NT

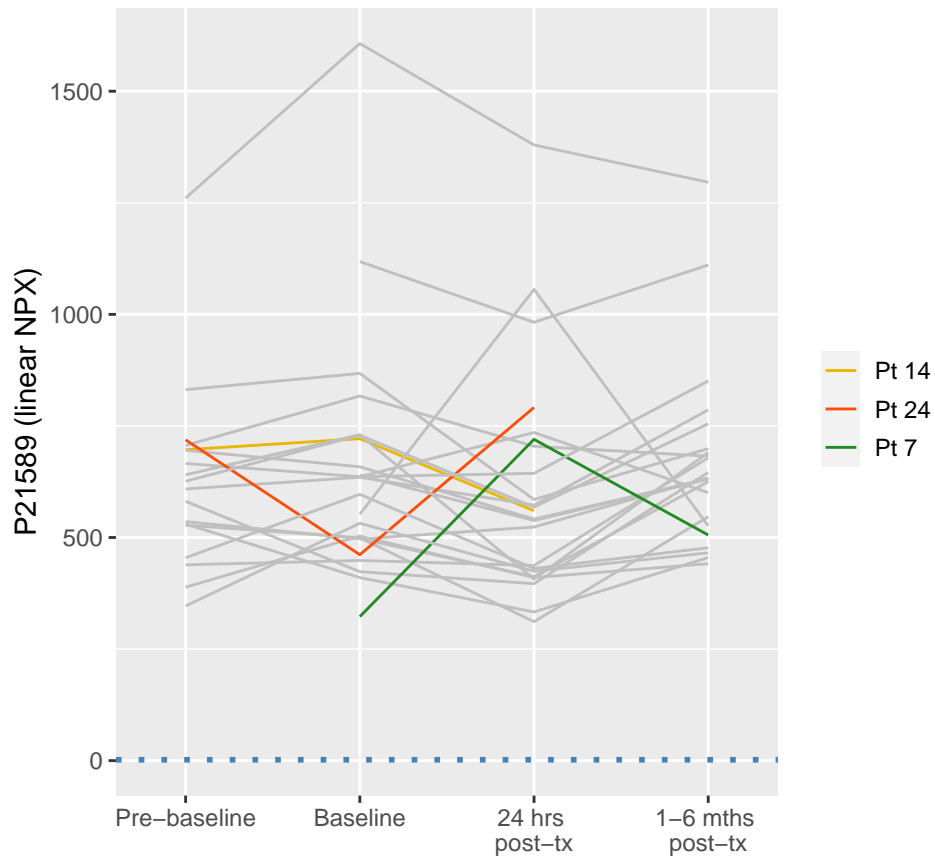

# Uniprot ID: P38936, analyte:CDKN1A

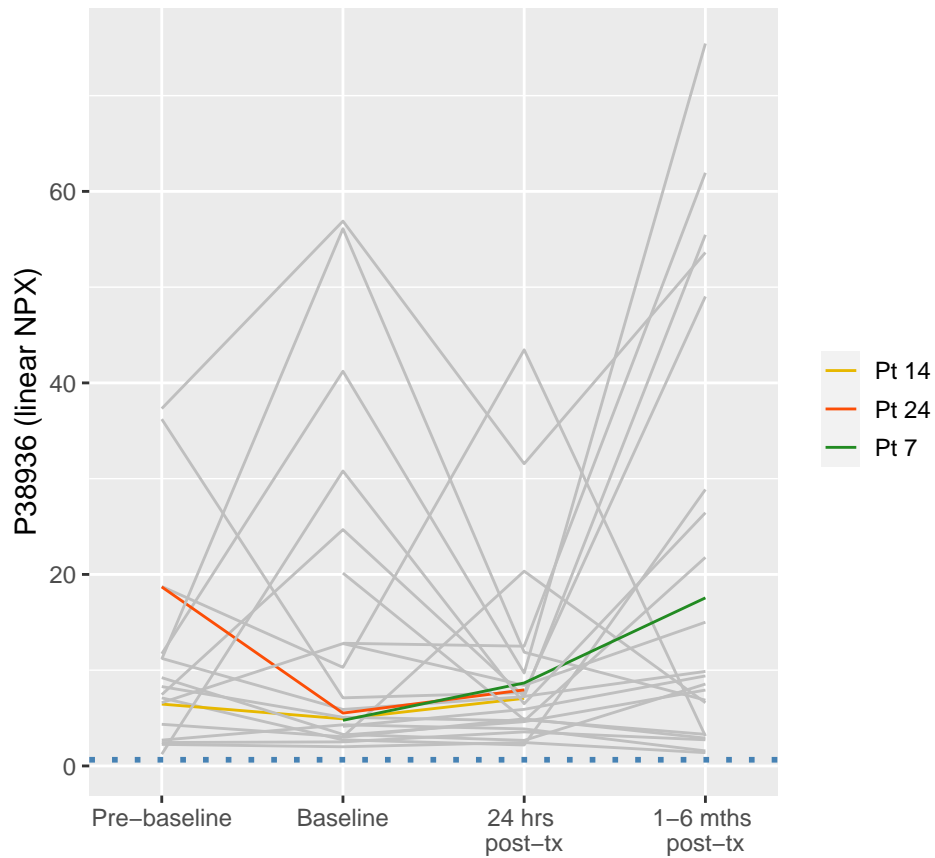



# Uniprot ID: O00548, analyte:DLL1

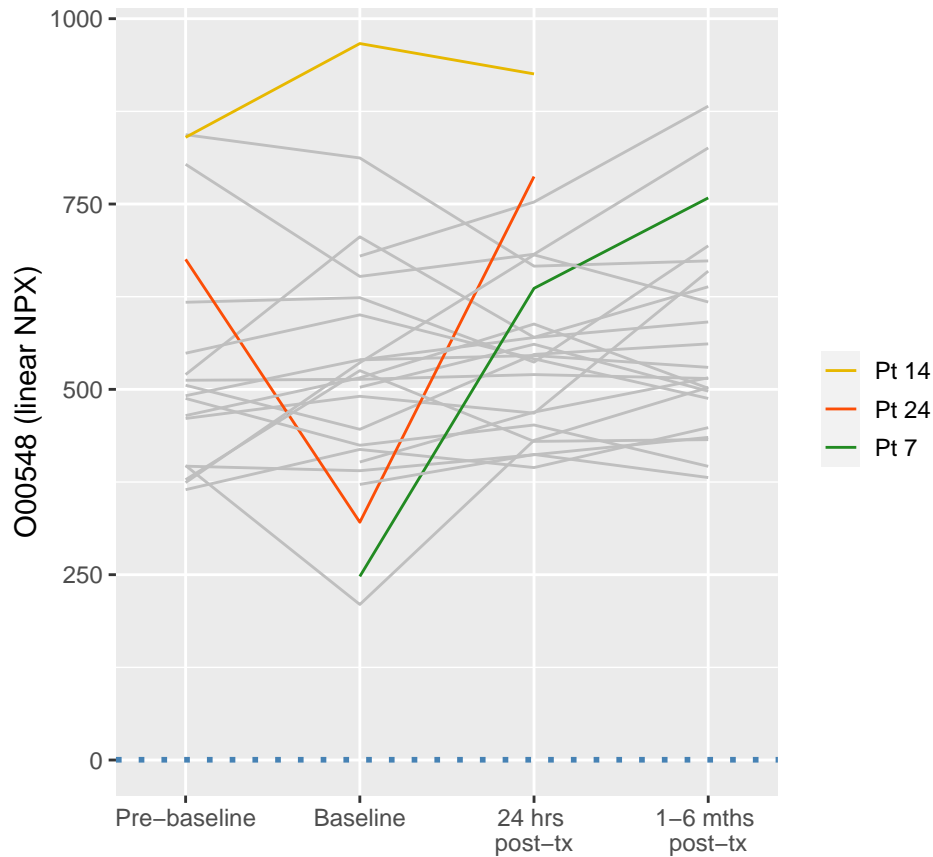

# Uniprot ID: P21741, analyte:MK

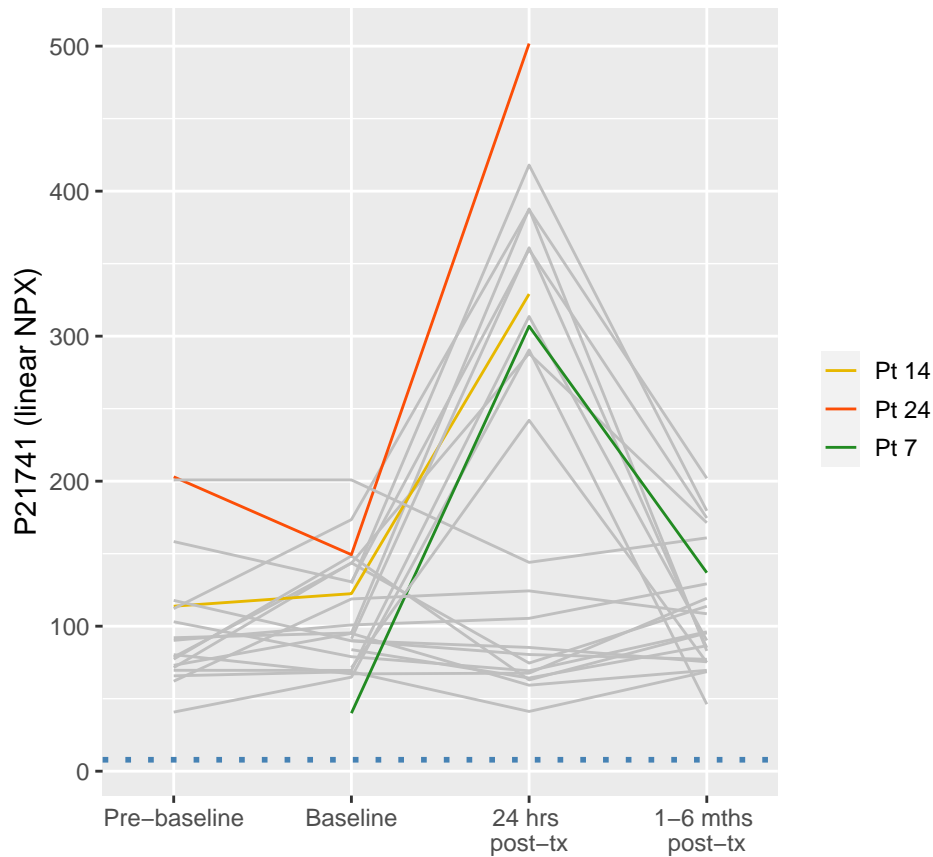

# Uniprot ID: P00519, analyte: ABL1

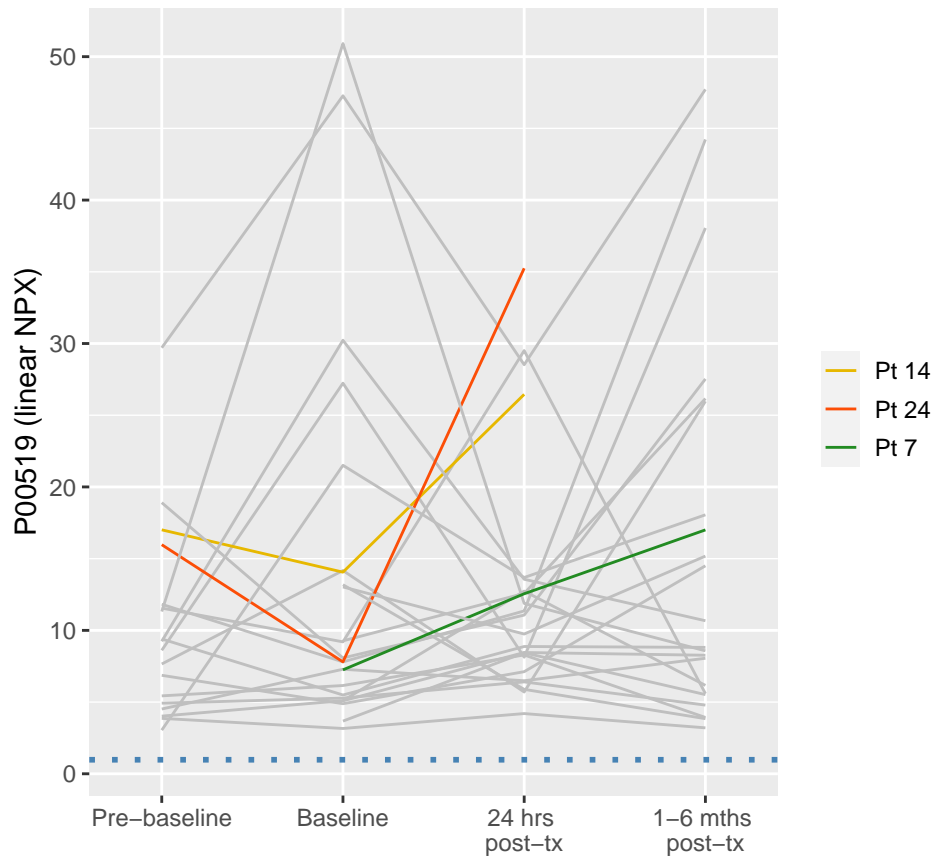

# Uniprot ID: Q14512, analyte:FGF-BP1

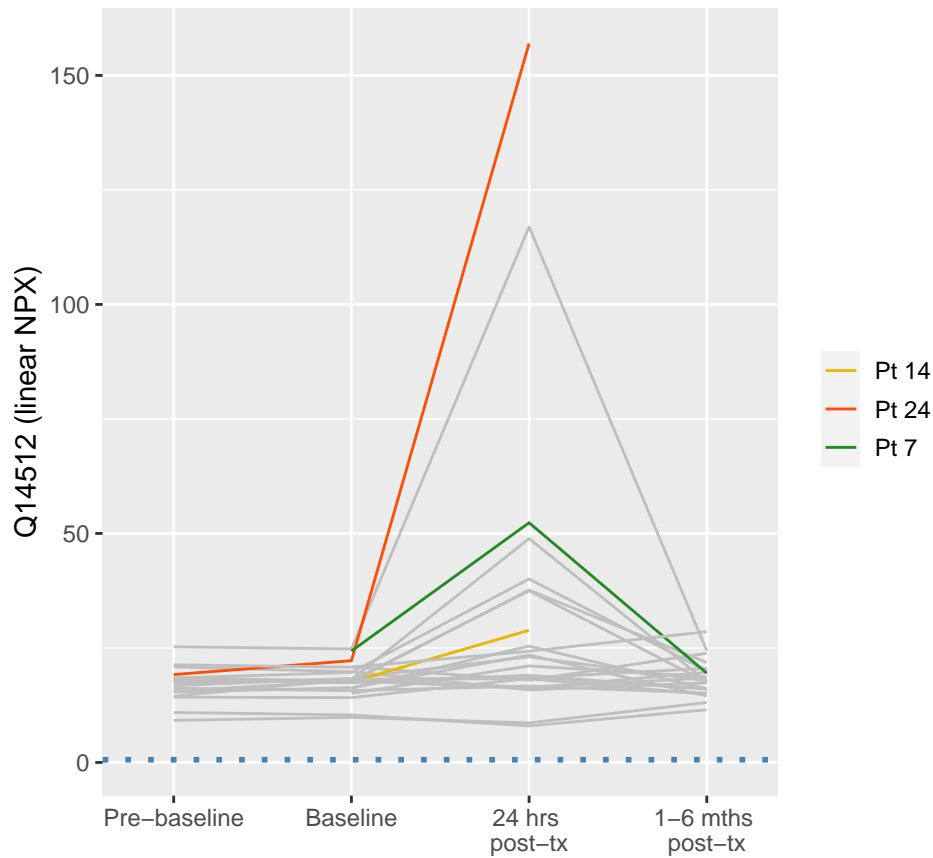

# Uniprot ID: O15455, analyte:TLR3

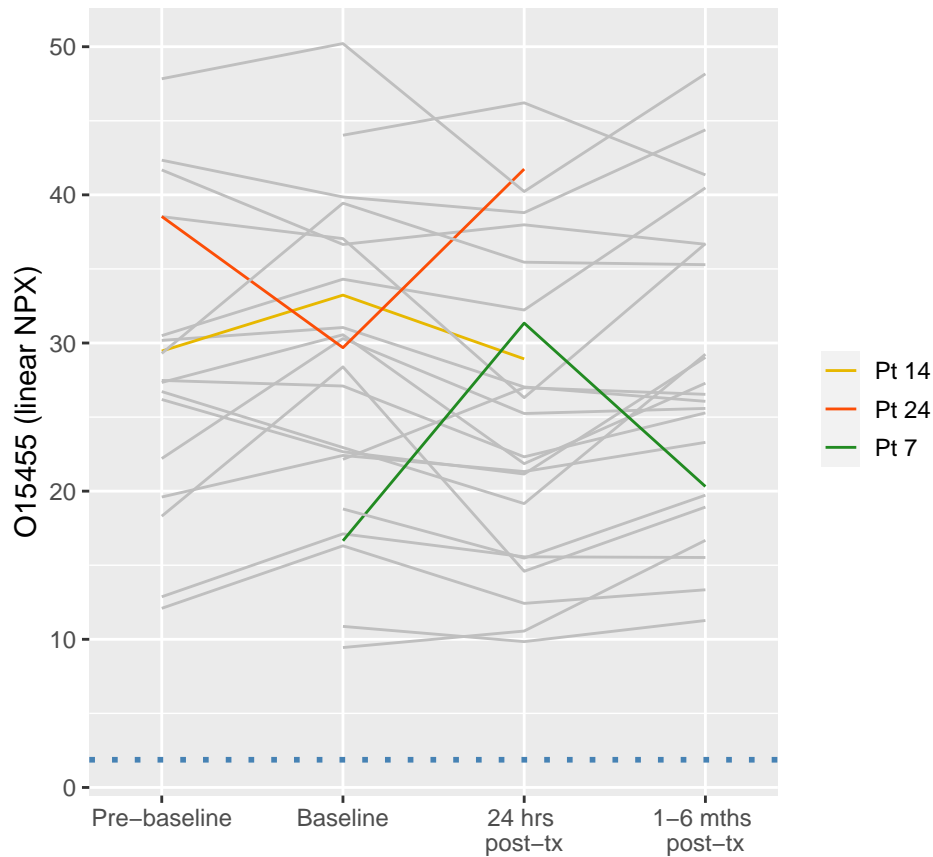

# Uniprot ID: P07948, analyte:LYN

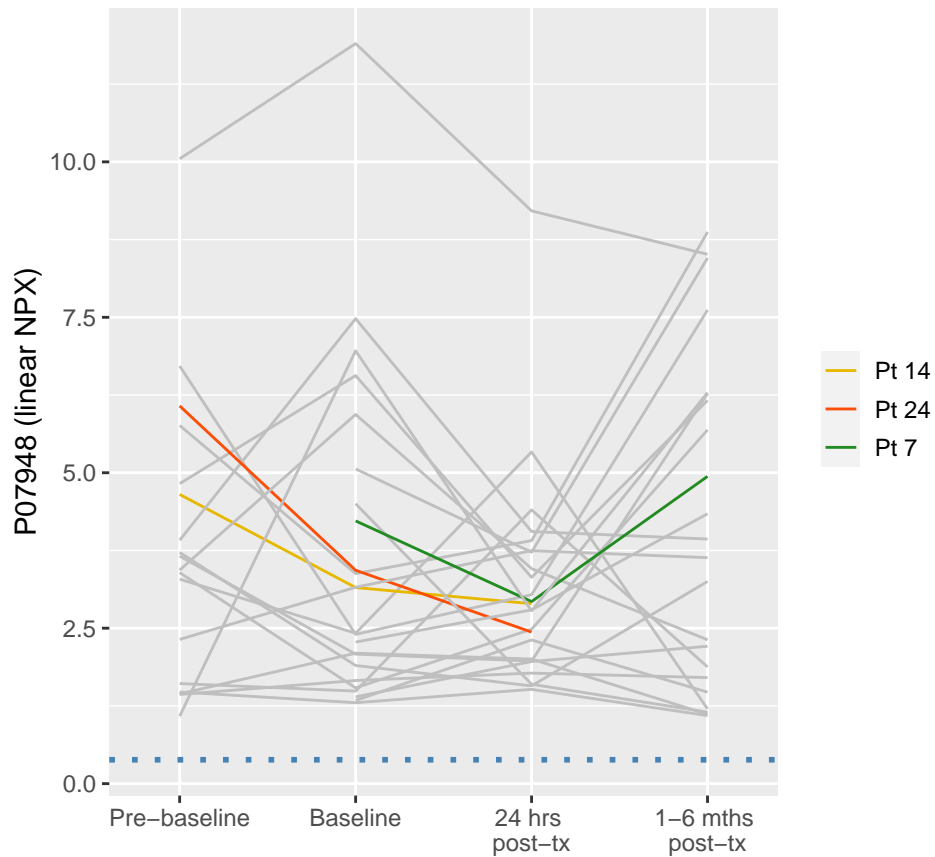

# Uniprot ID: P07949, analyte:RET

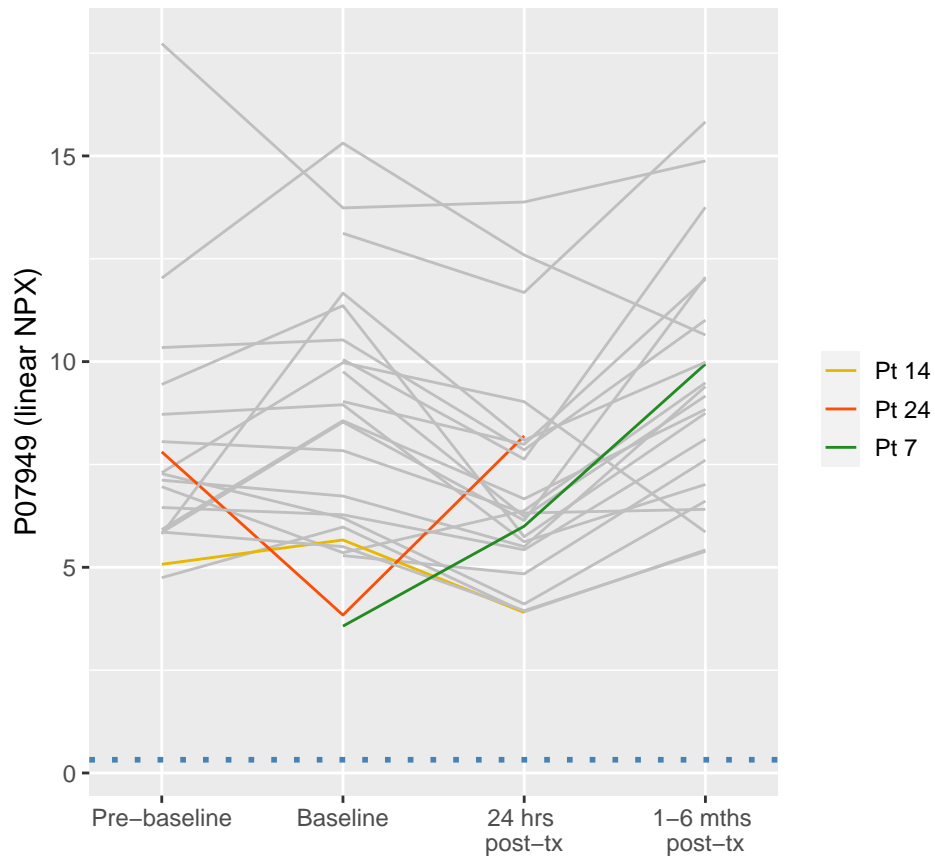

# Uniprot ID: P08670, analyte:VIM

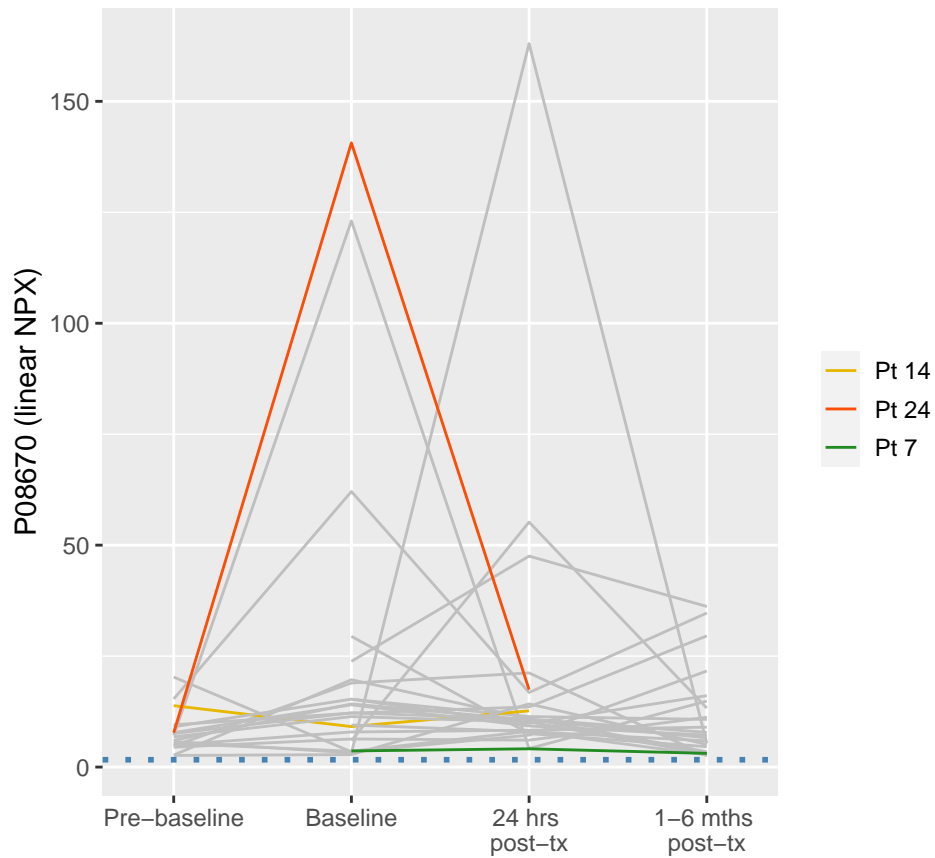



# Uniprot ID: Q9NS68, analyte:TNFRSF19

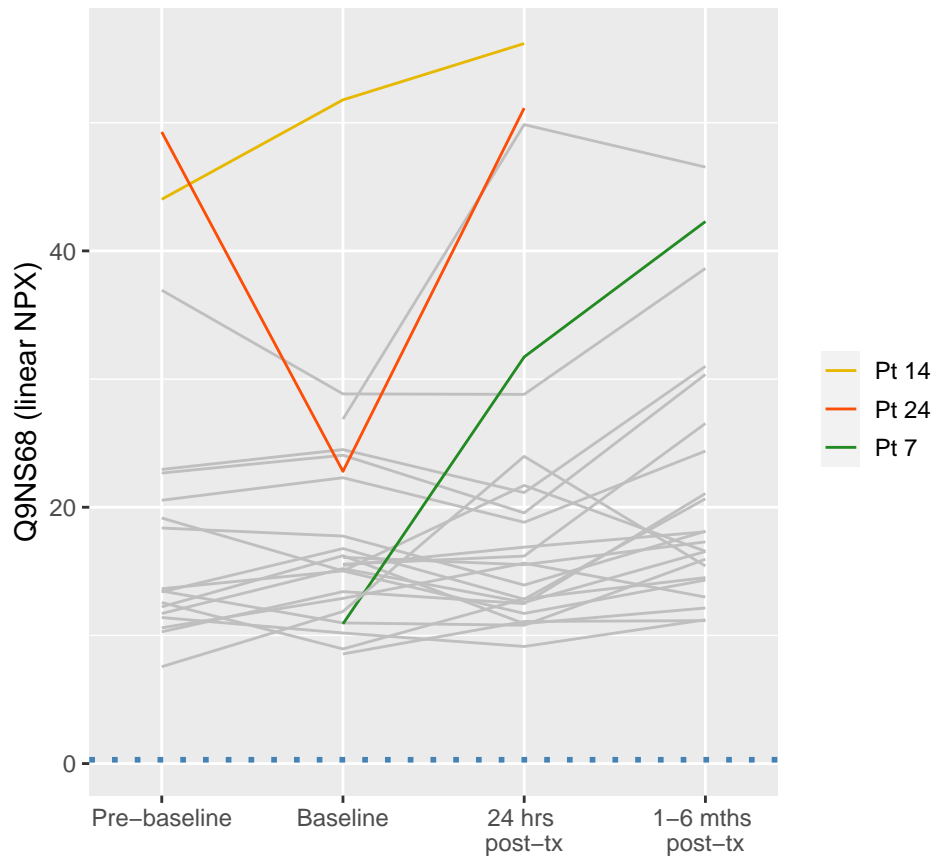

# Uniprot ID: Q9UBG3, analyte:CRNN

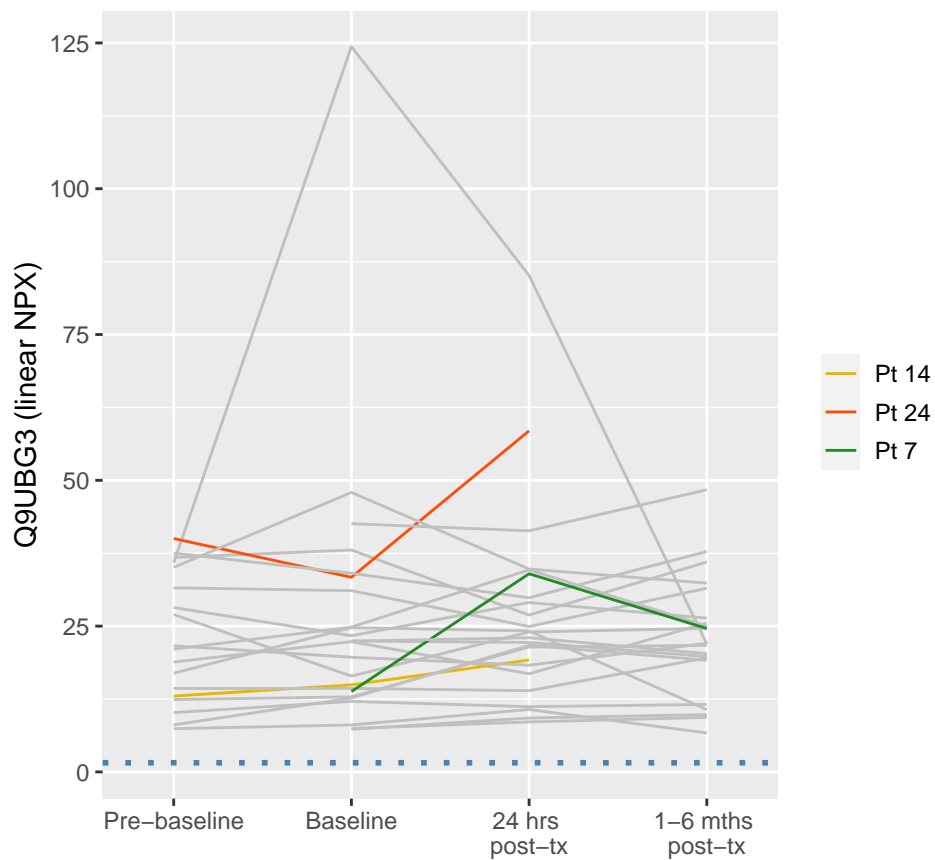

# Uniprot ID: P56279, analyte:TCL1A

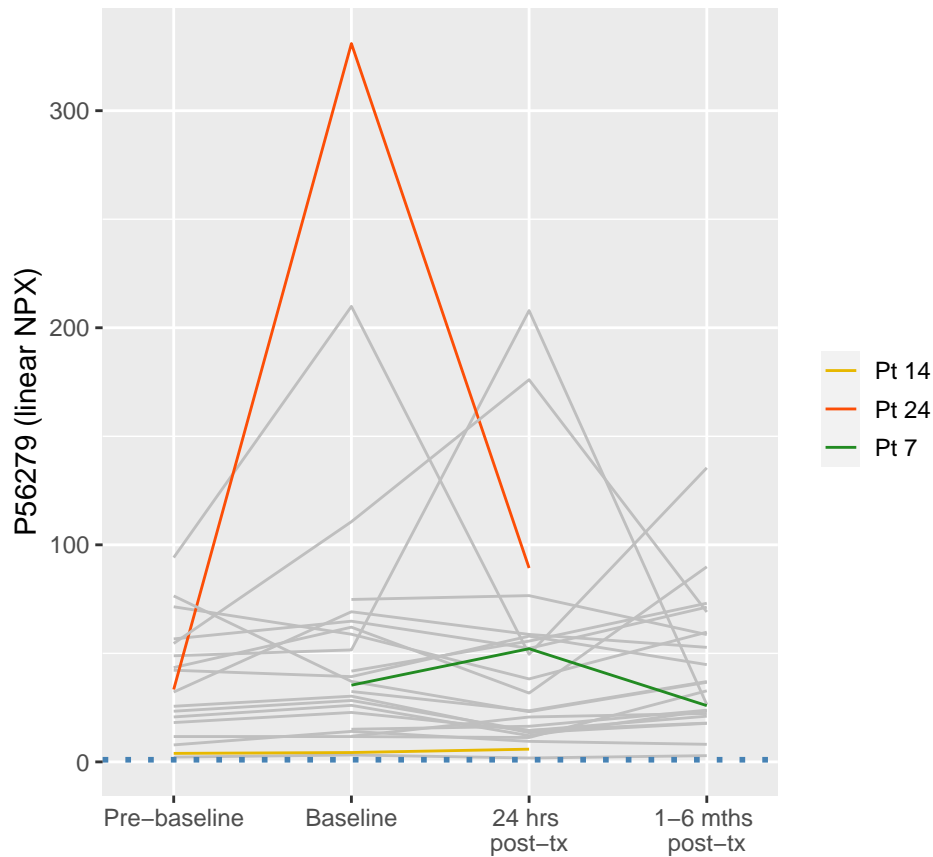

# Uniprot ID: O95971, analyte:CD160

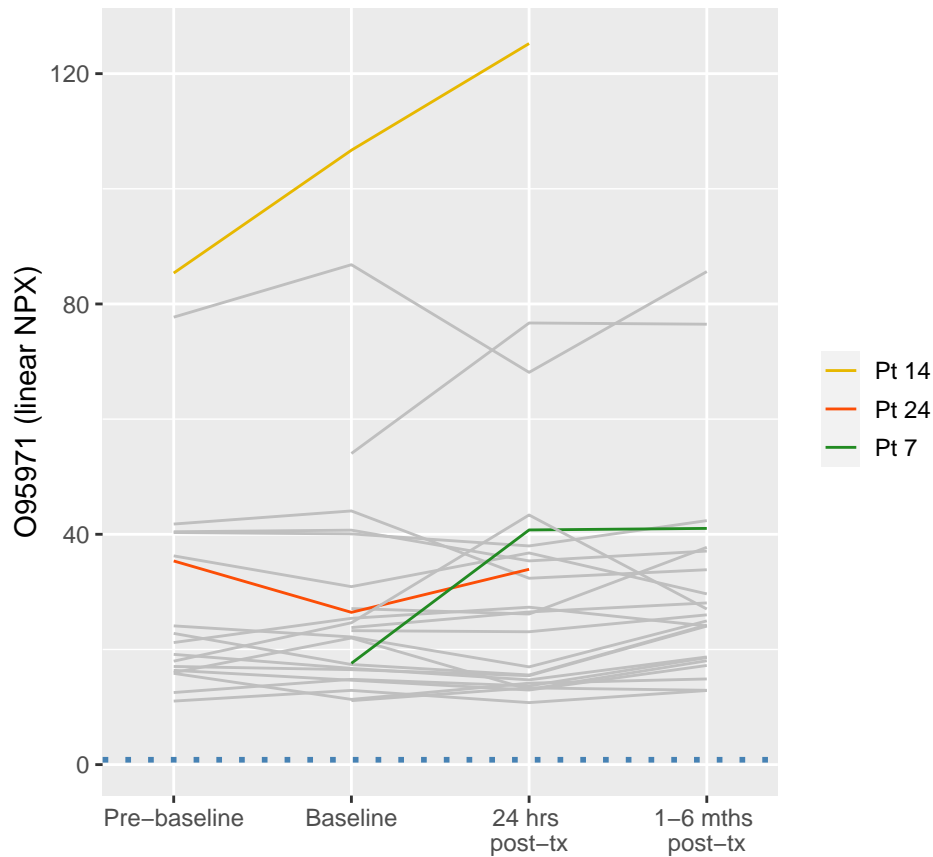

# Uniprot ID: P43489, analyte:TNFRSF4

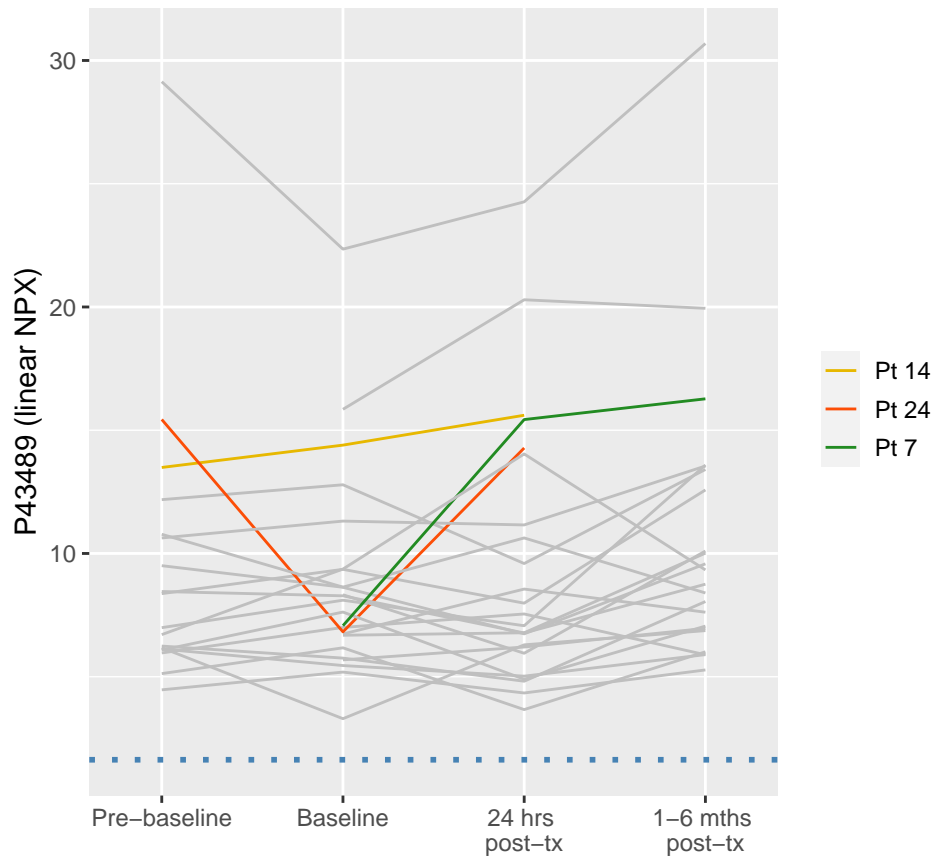

# Uniprot ID: Q29983.Q29980, analyte:MIC-A/B

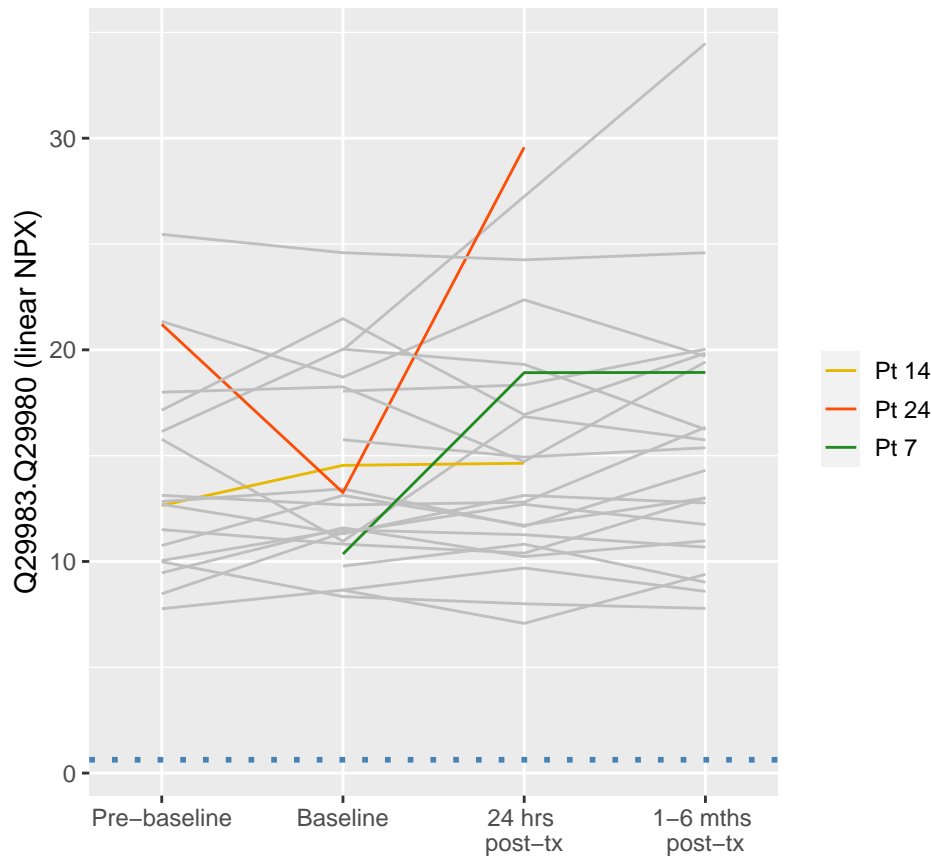

# Uniprot ID: O95388, analyte:WISP-1

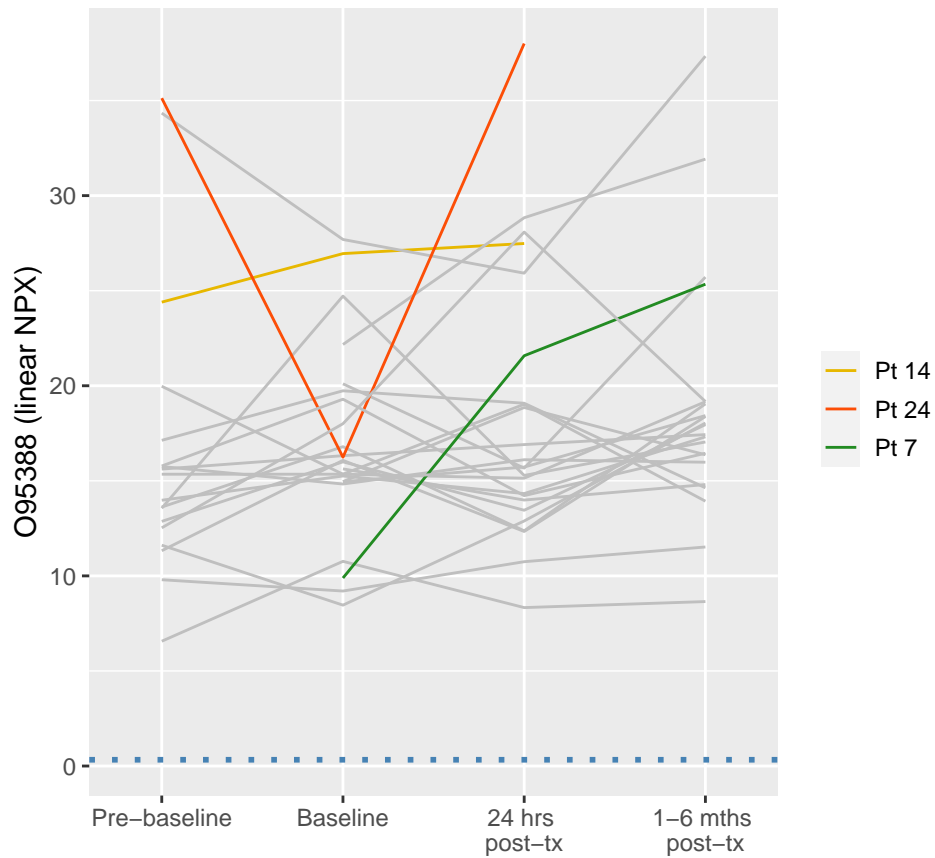

# Uniprot ID: Q6UXB2, analyte:CXL17

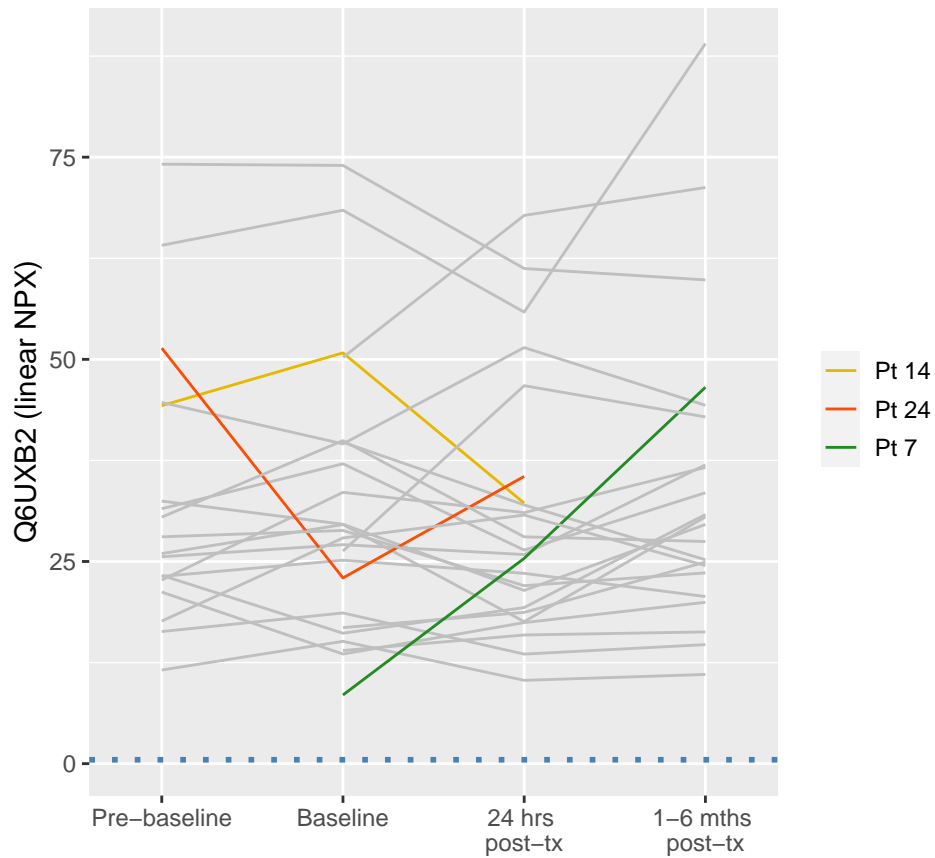



# Uniprot ID: P01298, analyte:PPY

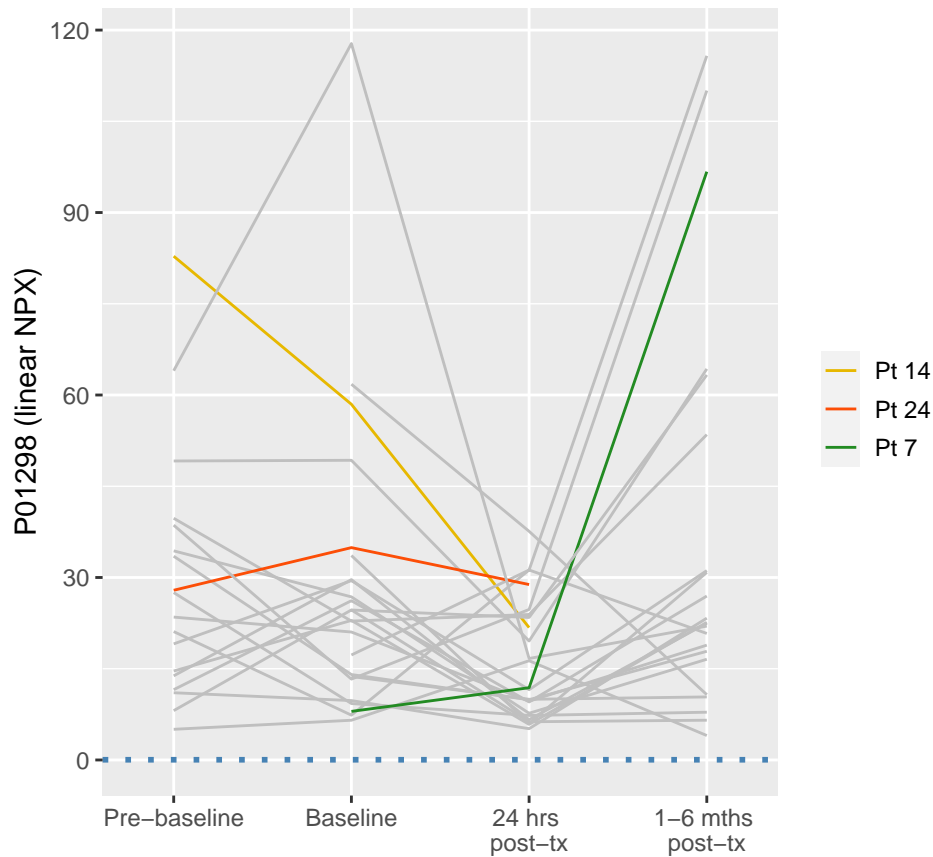

# Uniprot ID: P31949, analyte:S100A11

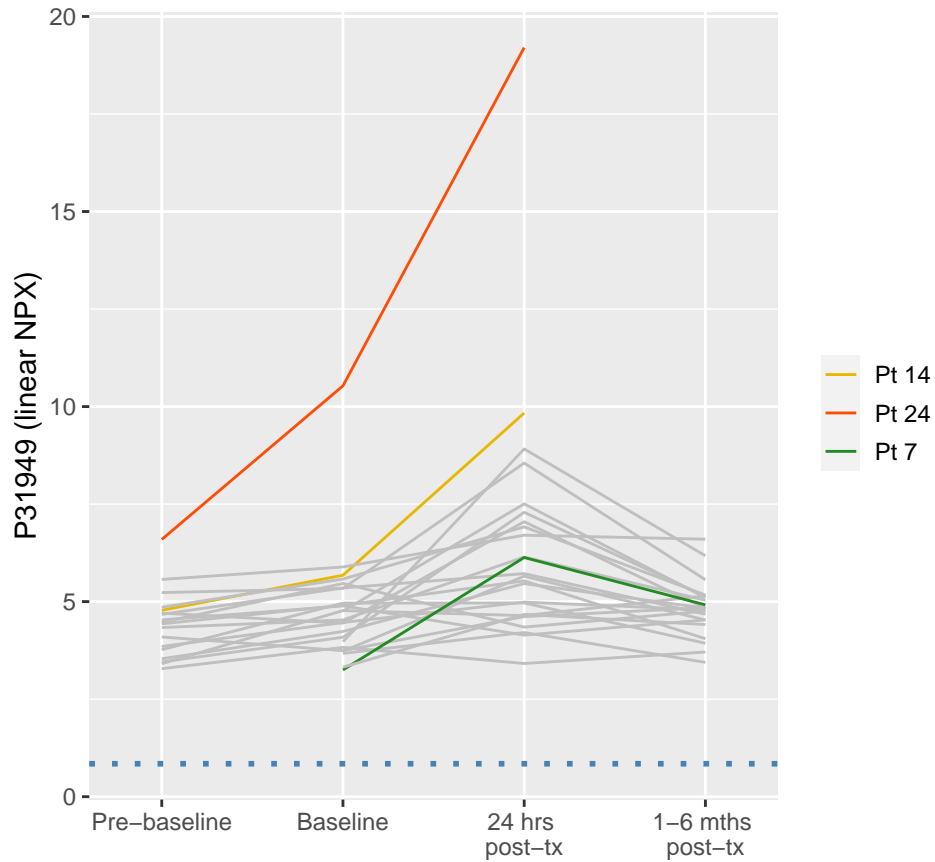

# Uniprot ID: P15514, analyte:AREG

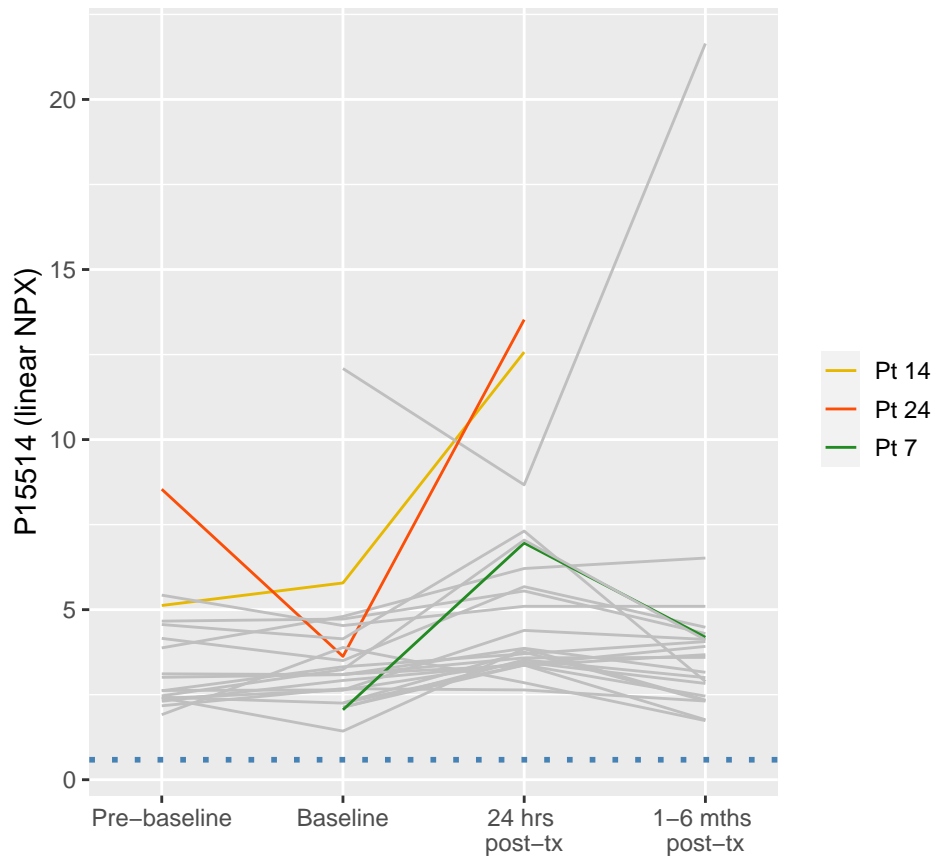

# Uniprot ID: Q9NQ30, analyte:ESM-1

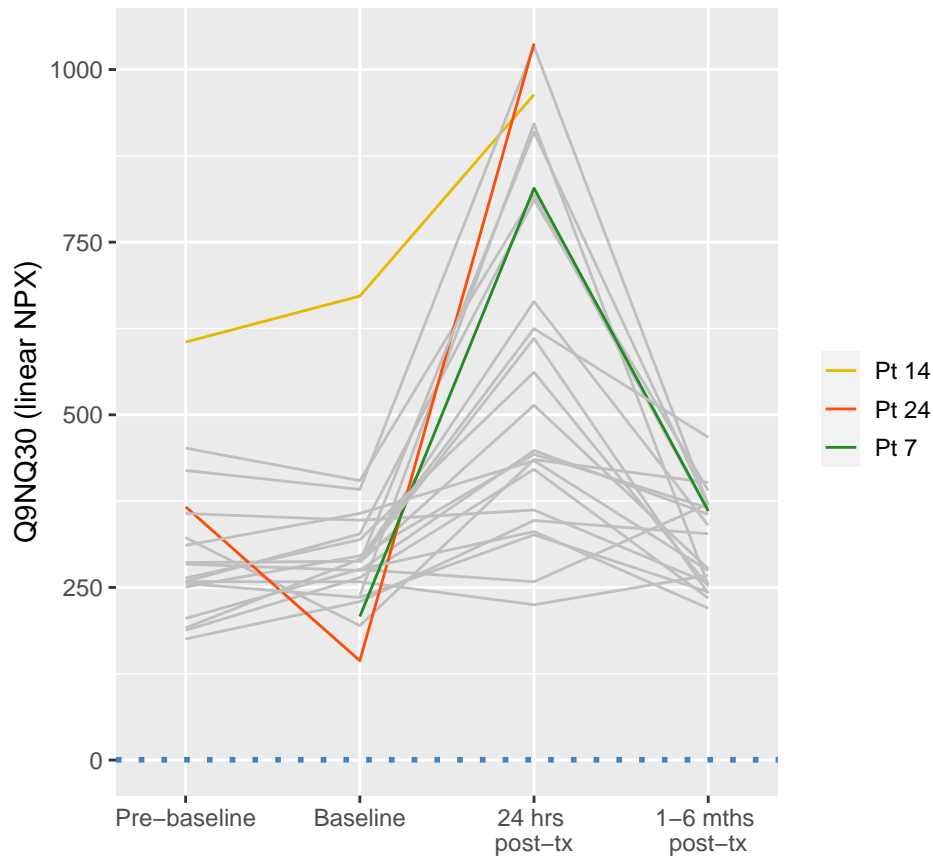

# Uniprot ID: Q9UJ71, analyte:CD207

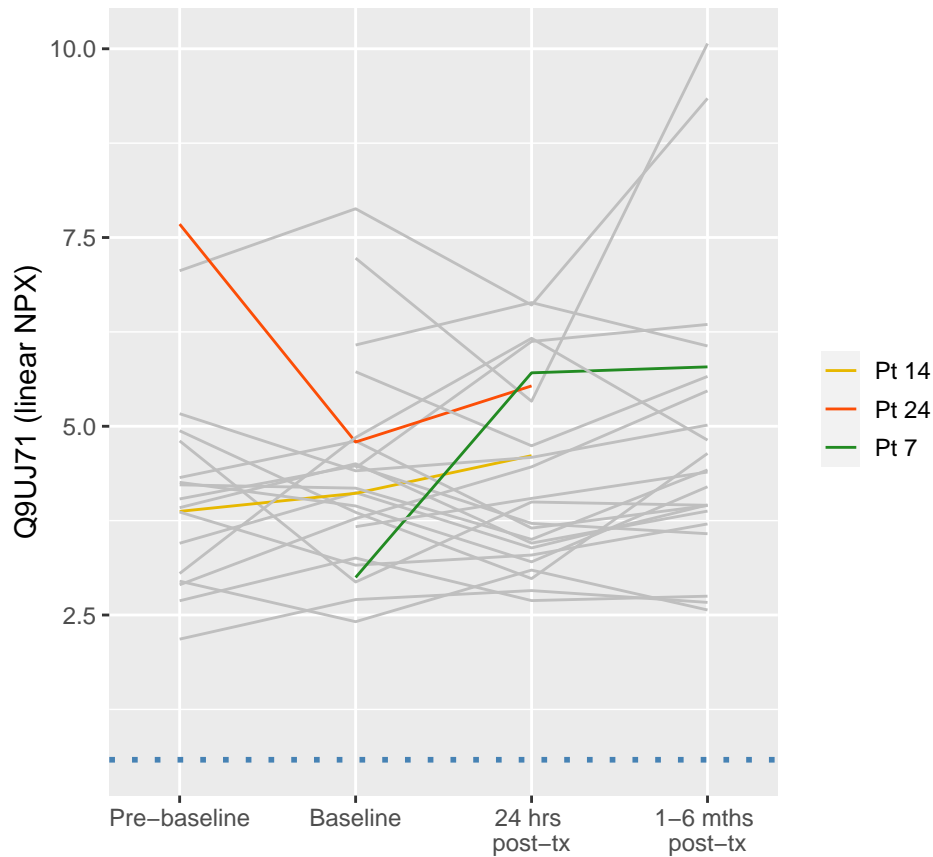

# Uniprot ID: O75144, analyte:ICOSLG

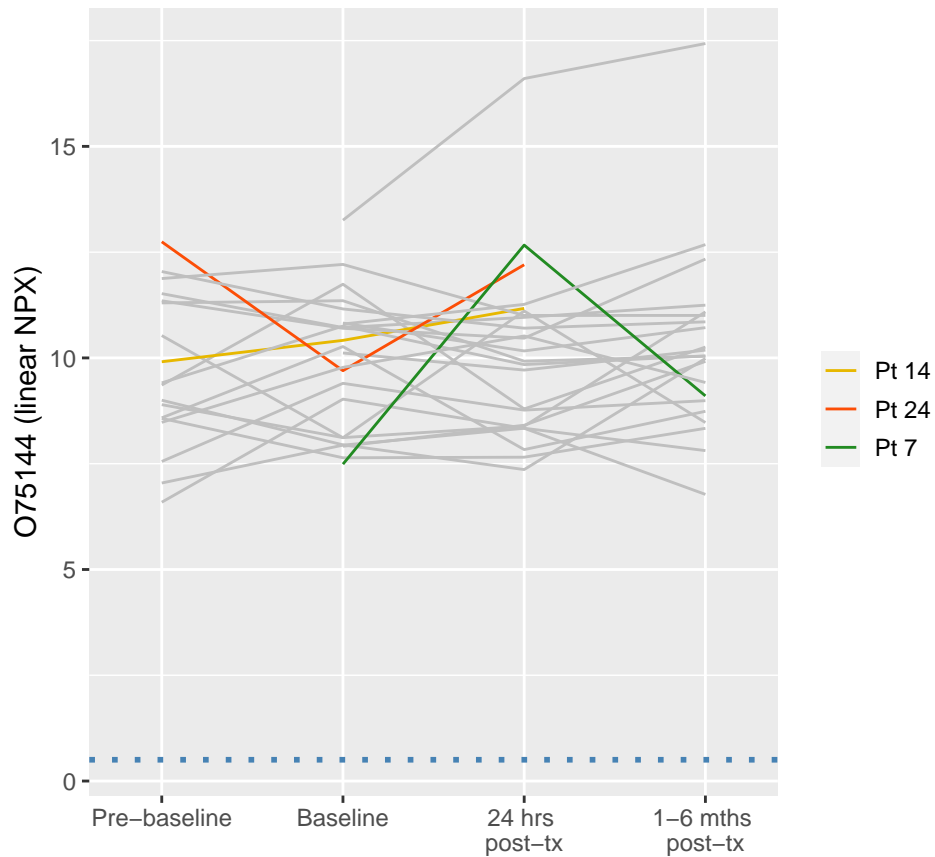

# Uniprot ID: Q14508, analyte:WFDC2

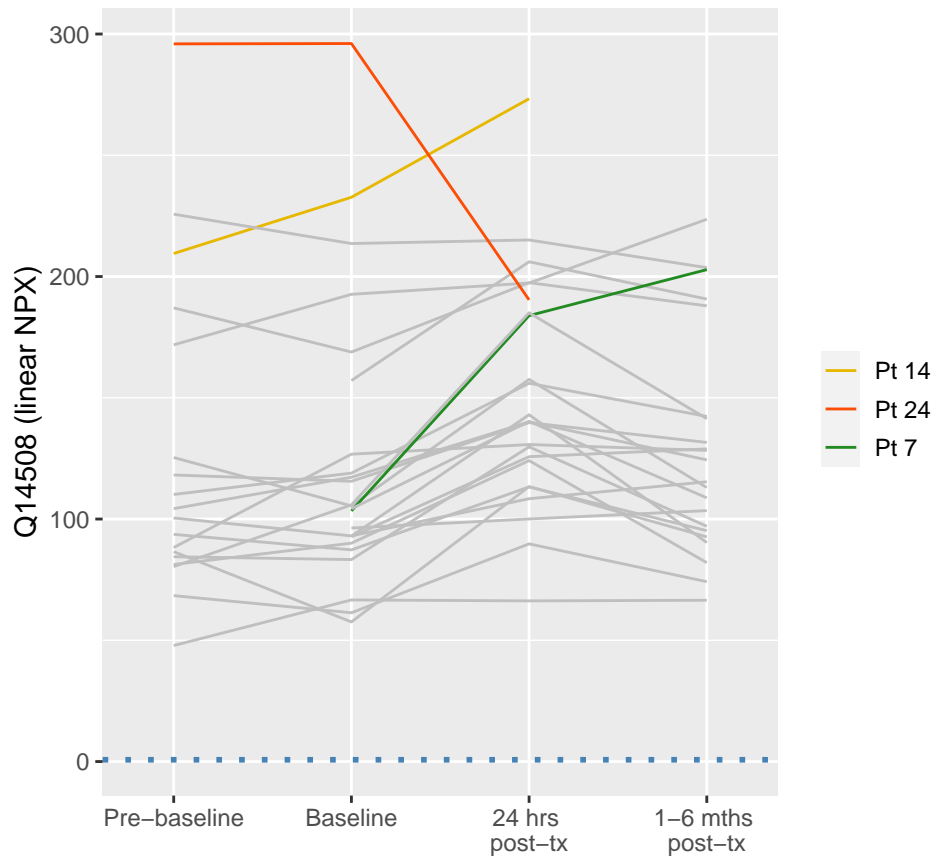

# Uniprot ID: O43927, analyte: CXCL13

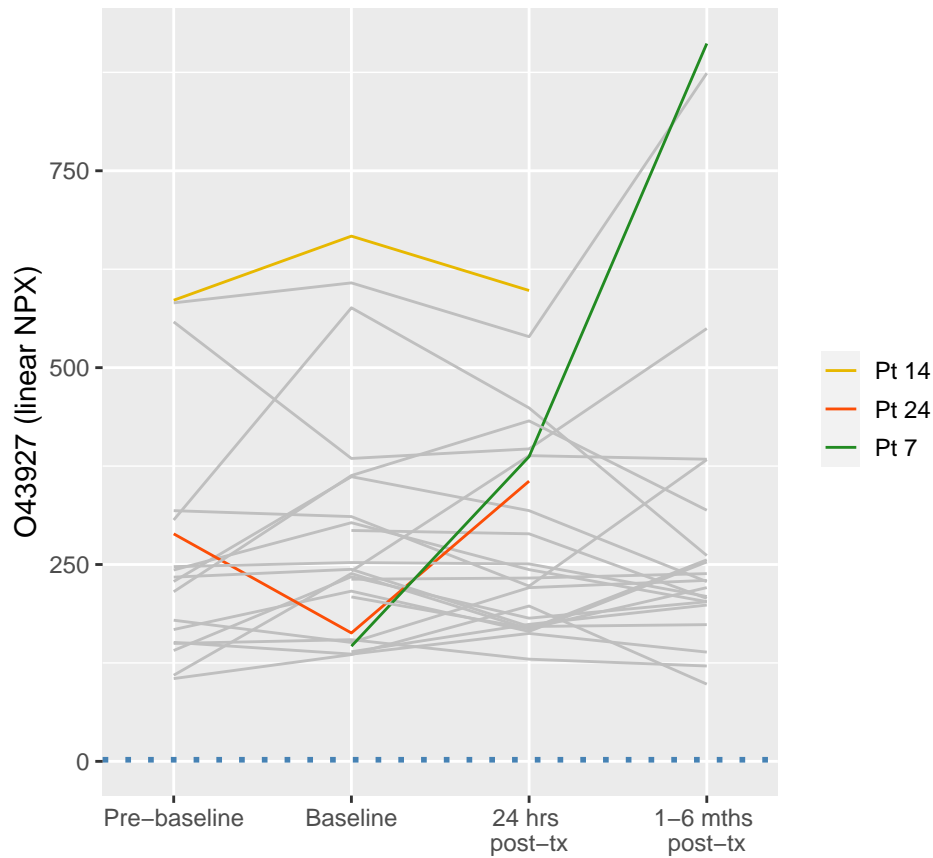



# Uniprot ID: Q99717, analyte:MAD homolog 5

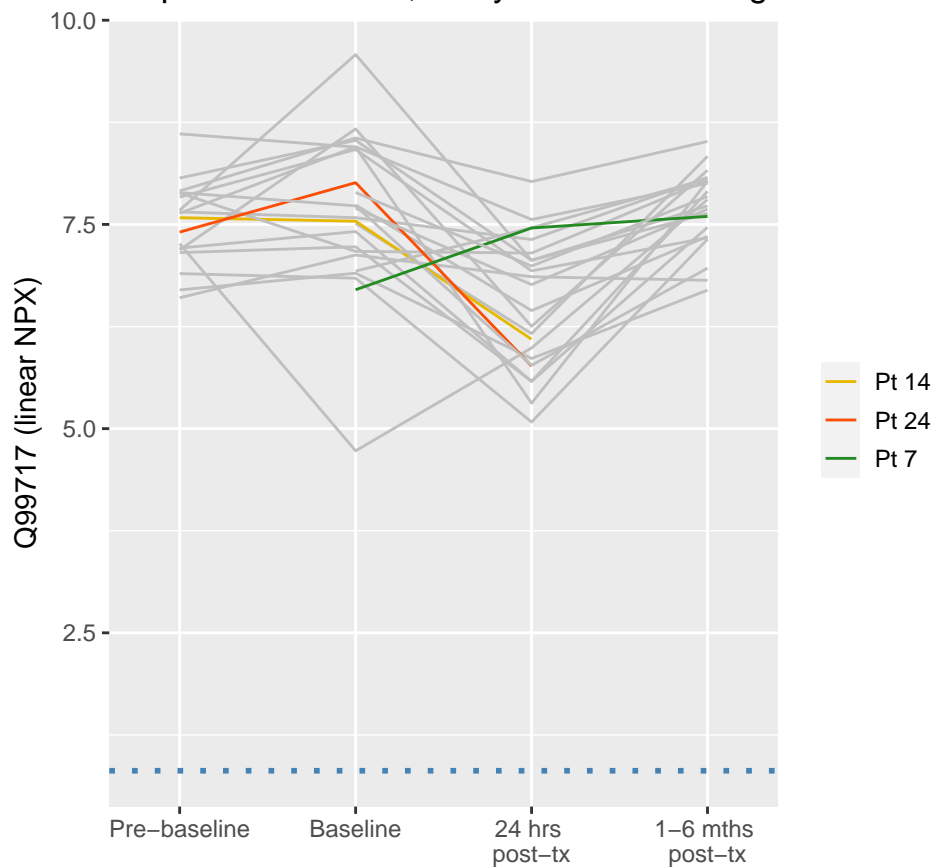

# Uniprot ID: Q8TE58, analyte:ADAM-TS 15

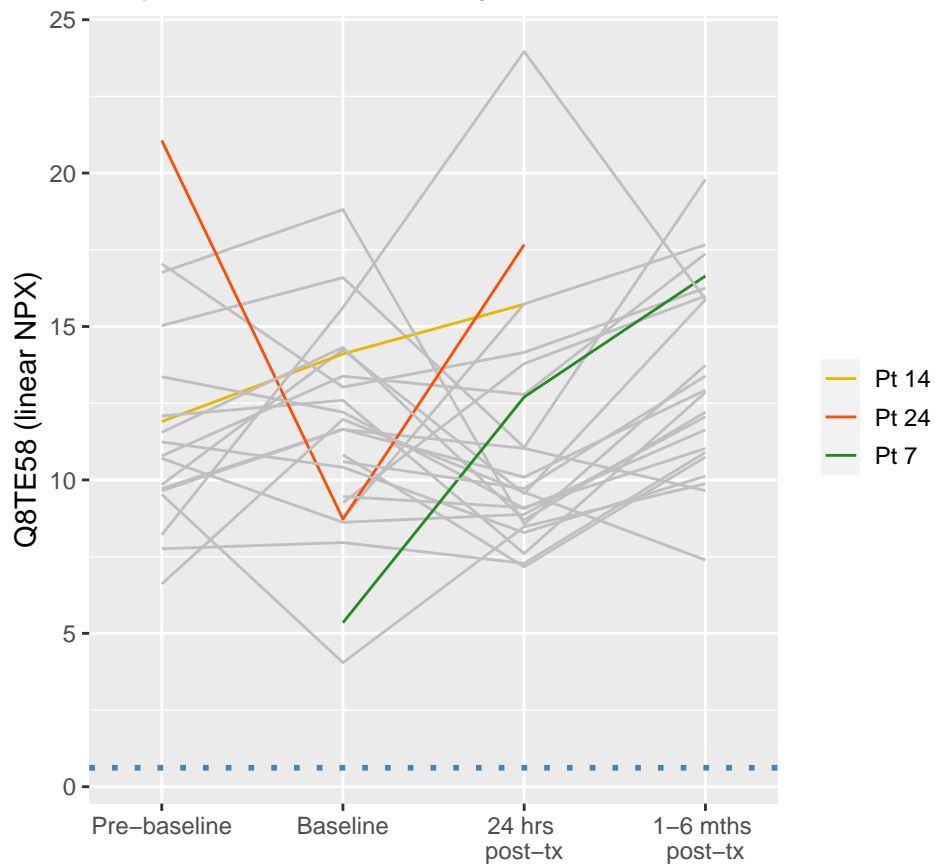

# Uniprot ID: P32970, analyte:CD70

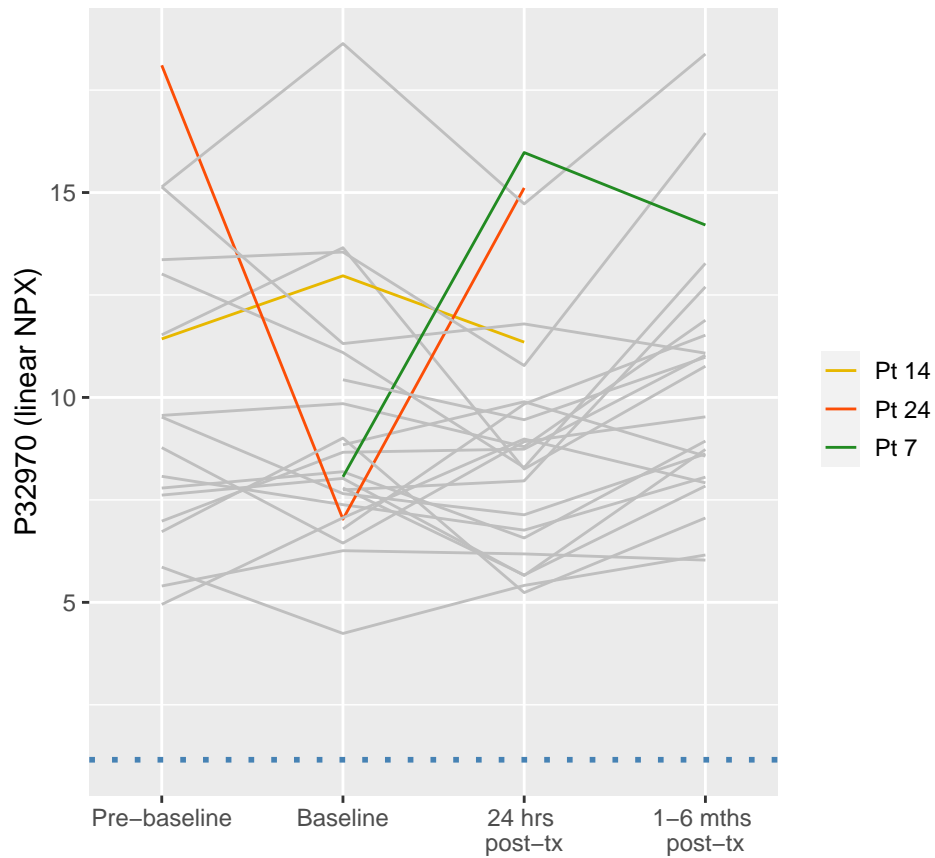

# Uniprot ID: Q9BXY4, analyte:RSPO3

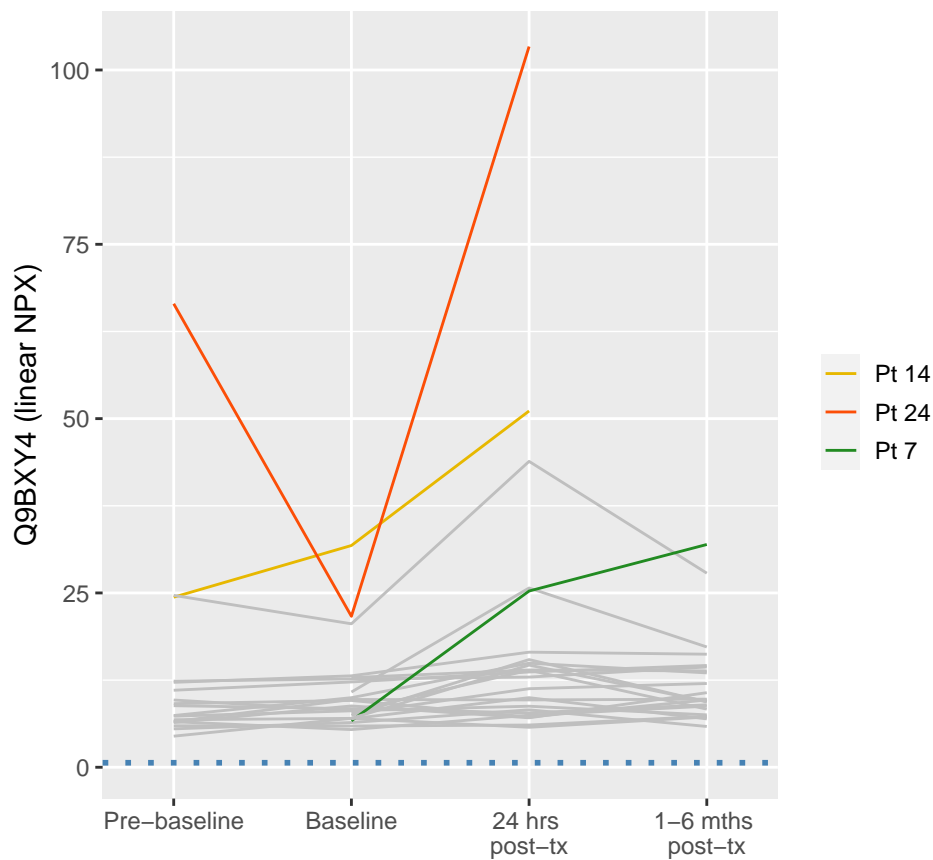

# Uniprot ID: P41439, analyte:FR-gamma

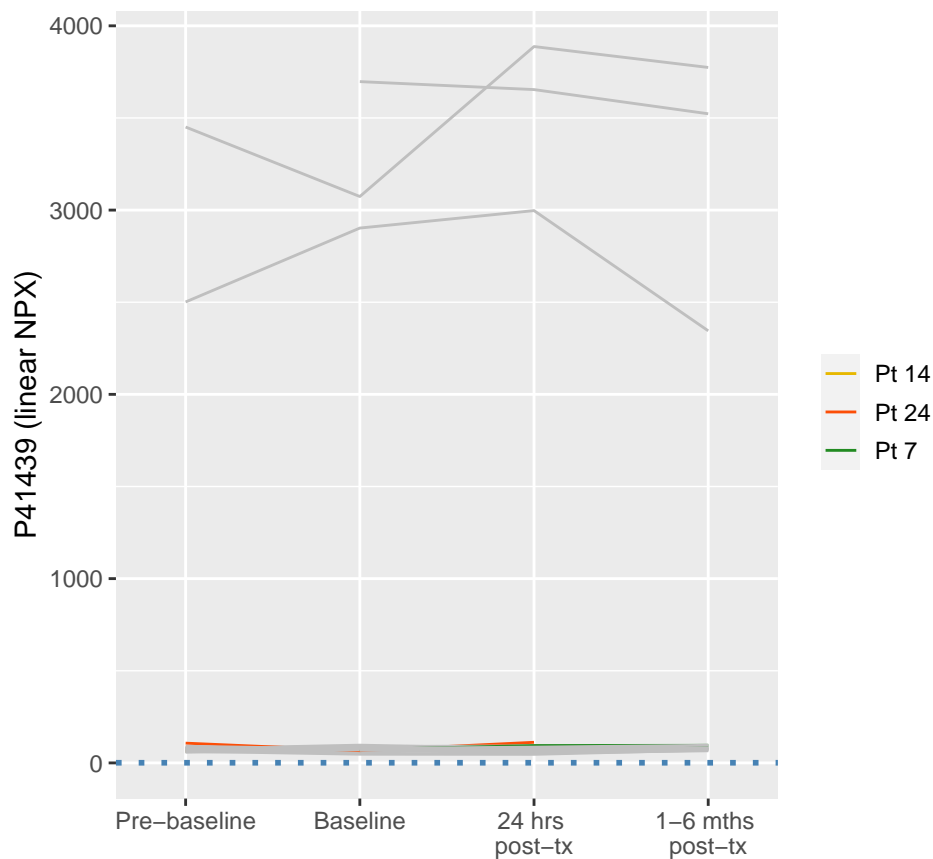

# Uniprot ID: P06731, analyte:CEACAM5

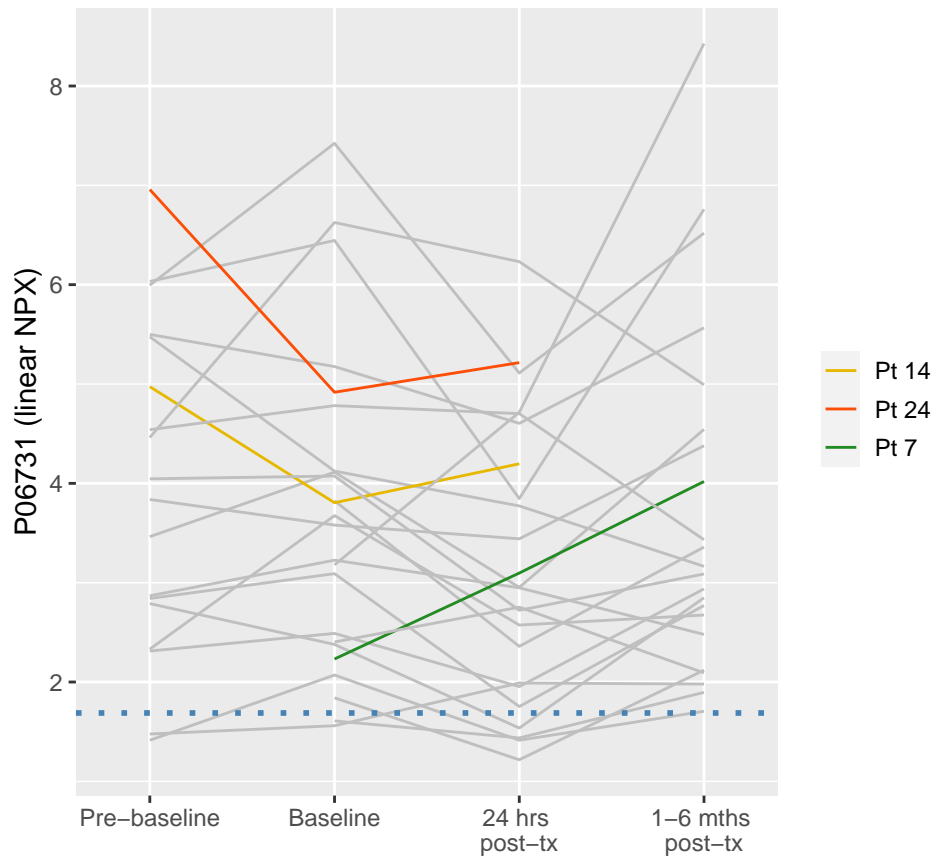

# Uniprot ID: P35916, analyte:VEGFR-3

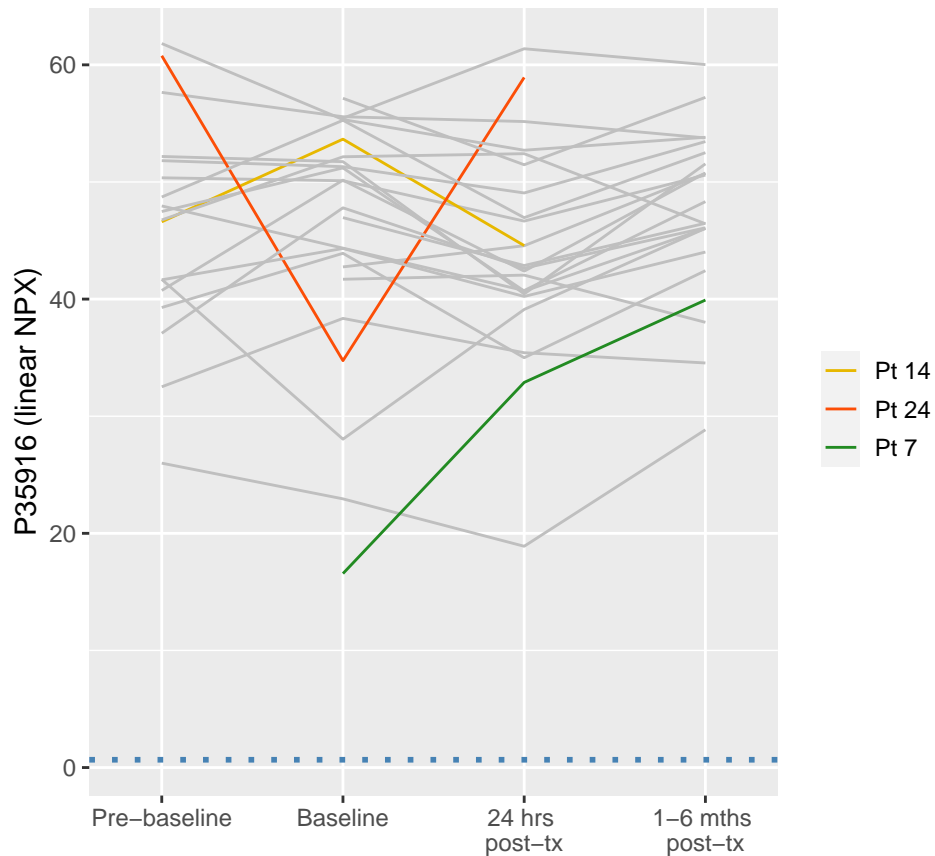

# Uniprot ID: Q8WXI7, analyte:MUC-16

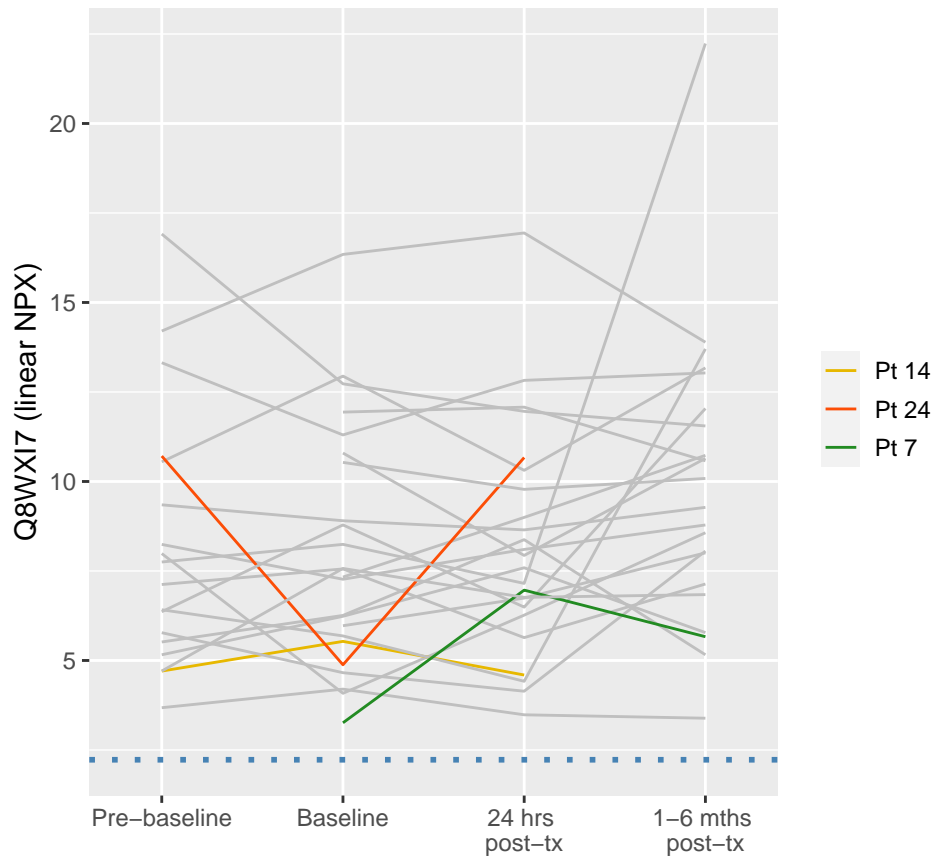



# Uniprot ID: Q9Y5W5, analyte:WIF-1

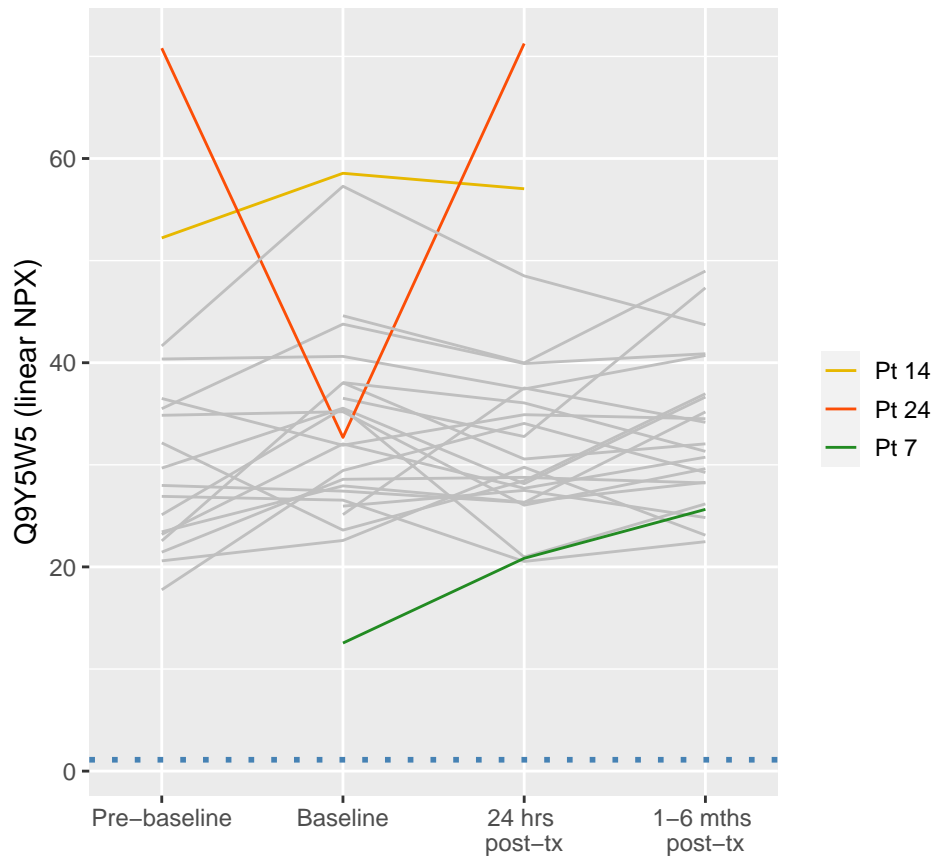

# Uniprot ID: P10144, analyte:GZMB

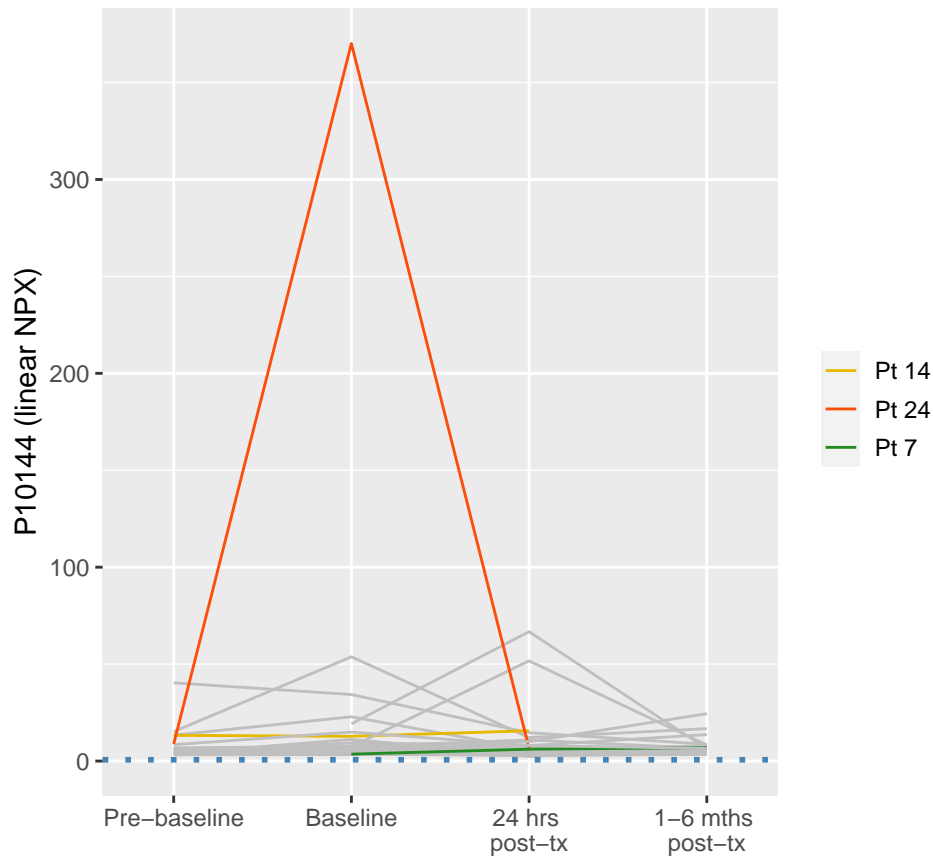

# Uniprot ID: Q6BAA4, analyte:FCRLB

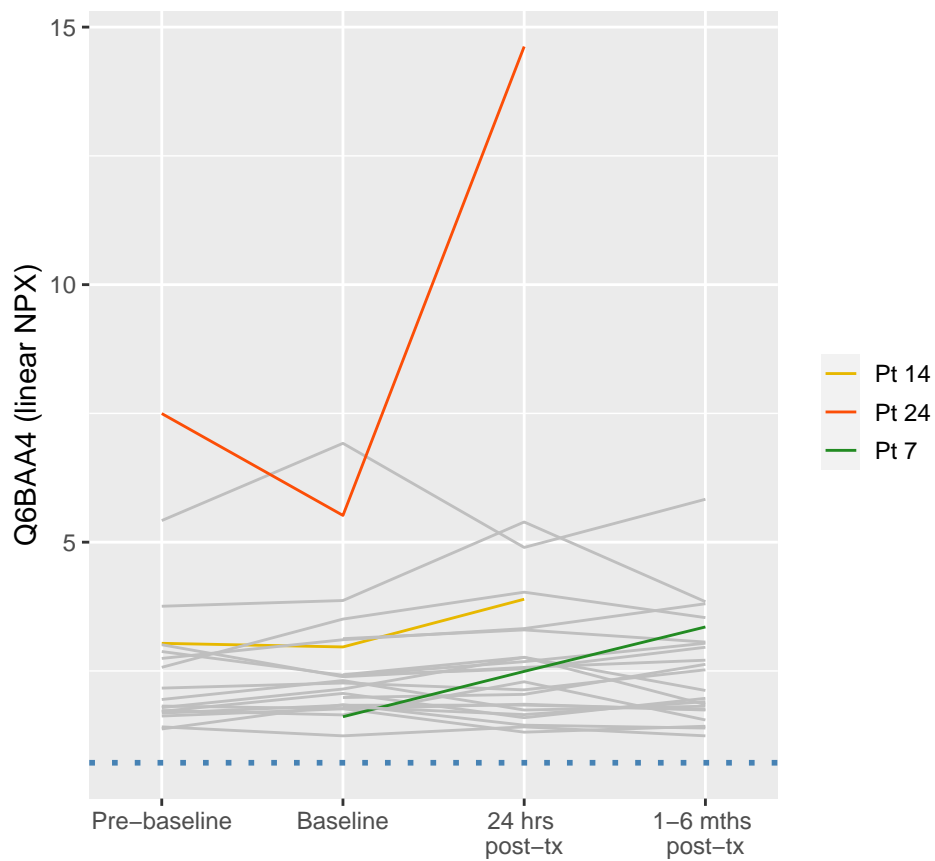

# Uniprot ID: P04083, analyte:ANXA1

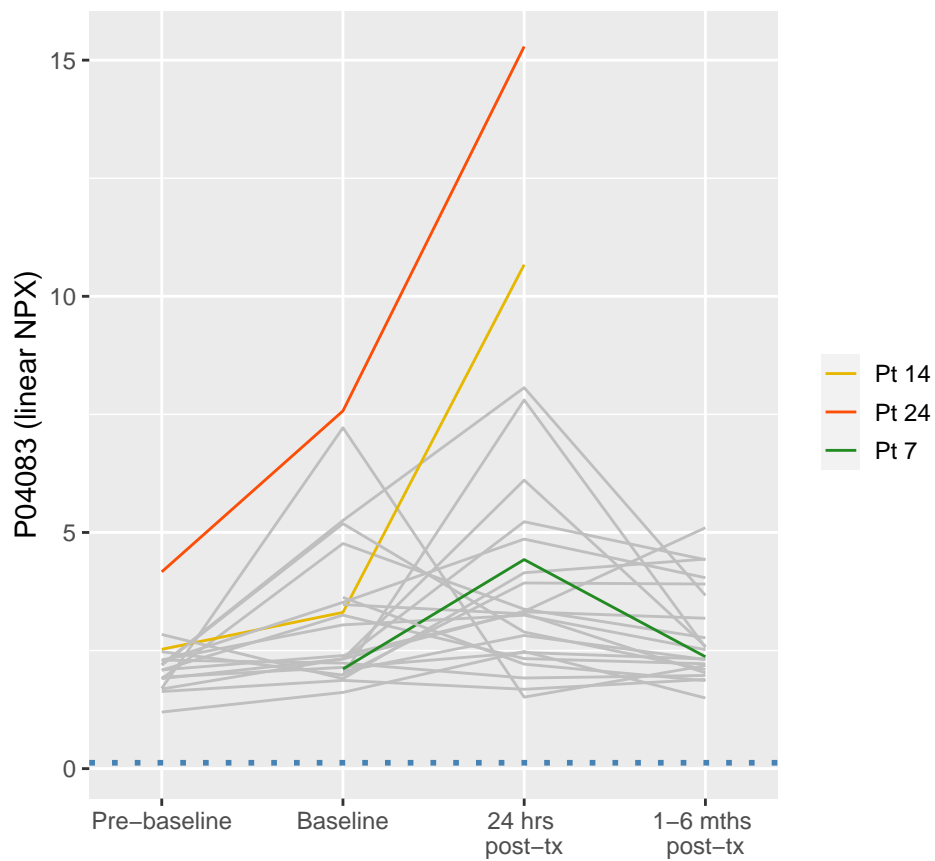

# Uniprot ID: P15328, analyte:FR-alpha

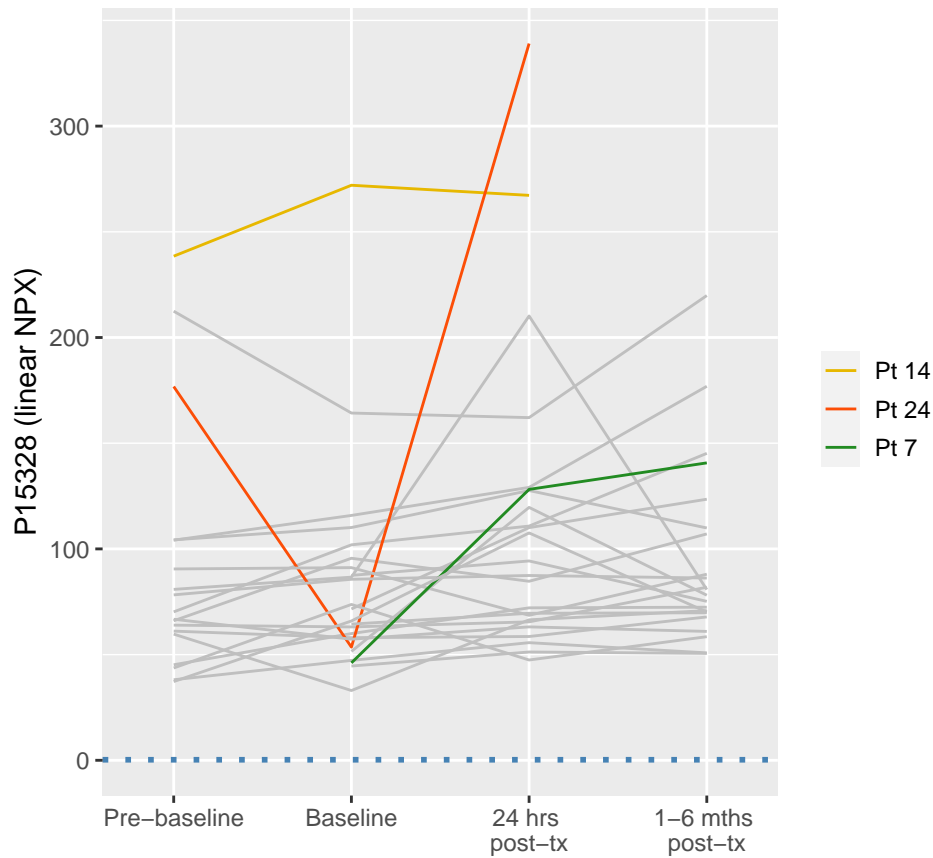

Supplement: s1 [file s1]
