# Supplementary material for: An Exploratory Analysis of Changes in Circulating Plasma Protein Profiles Following Image-Guided Ablation of Renal Tumours Provides Evidence for Effects on Multiple Biological Processes
Source: MDPI journal article supplement (doi:10.3390/cancers13236037), 2021-11-30

**Figure S5.** Longitudinal profiles of plasma proteins which increased significantly ( $p < 0.05$  and  $q < 0.01$ ; TP3 vs TP2) in patients 24 hours post-CRYO ( $n=24$  patients as 1 TP3 sample failed analytical QC). Results for each protein are expressed as a % of the reference baseline (TP2; 100%).

# Uniprot ID: P10145, analyte: IL8

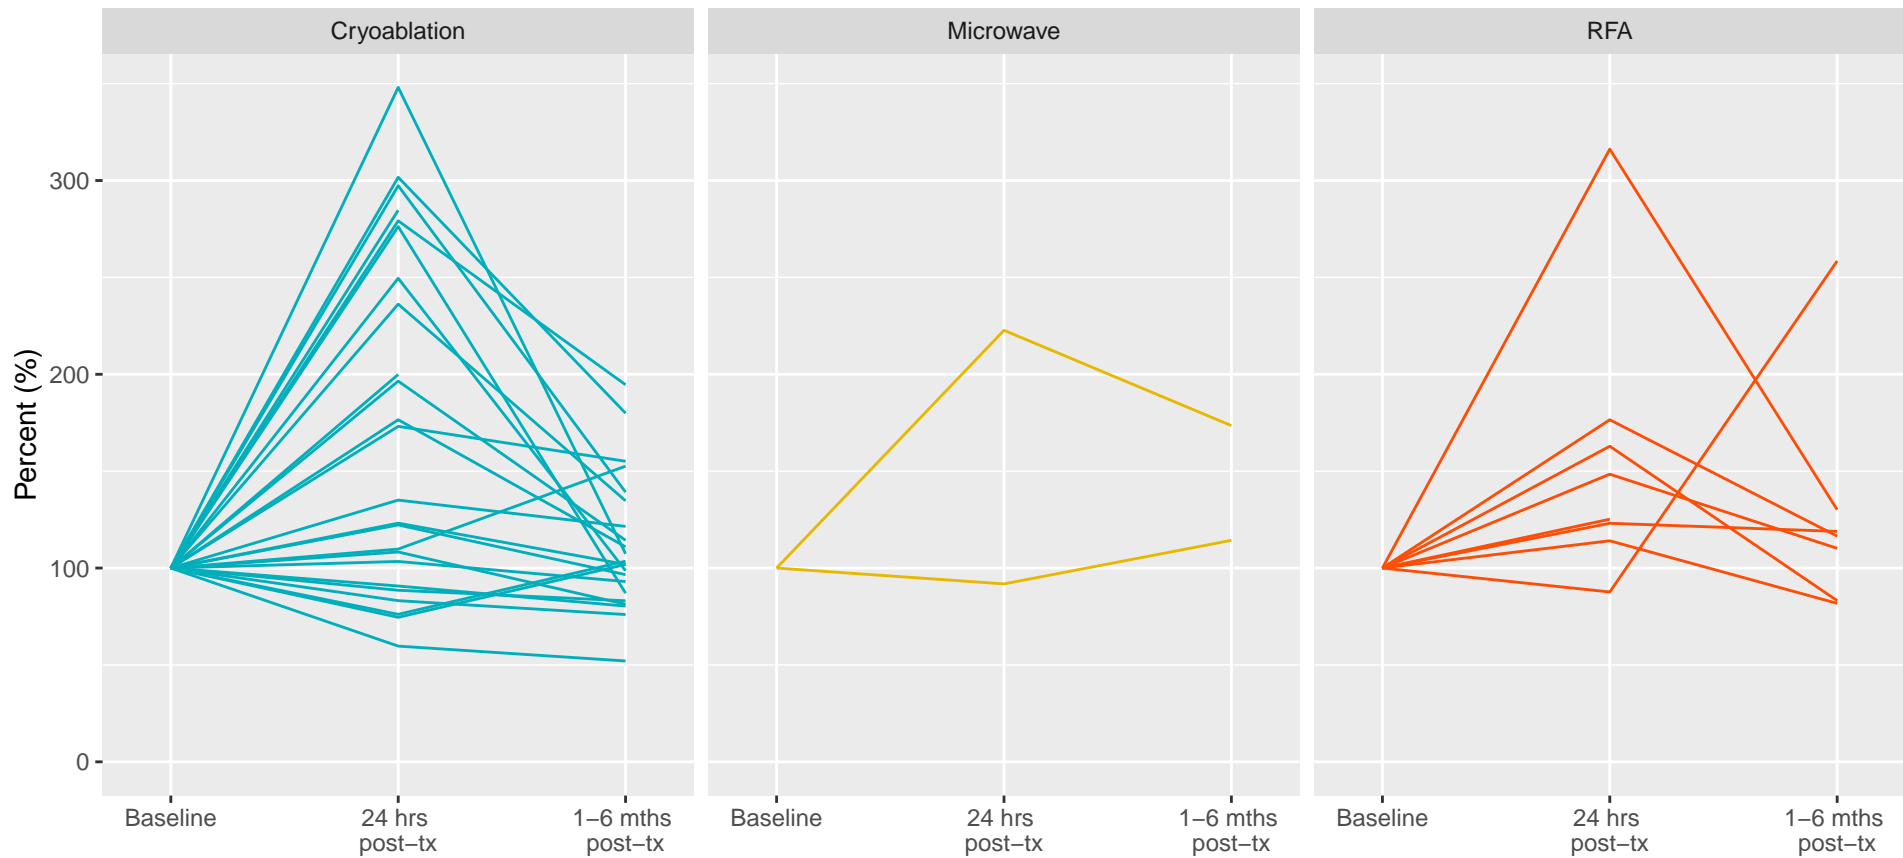

Uniprot ID: P80098, analyte: MCP-3

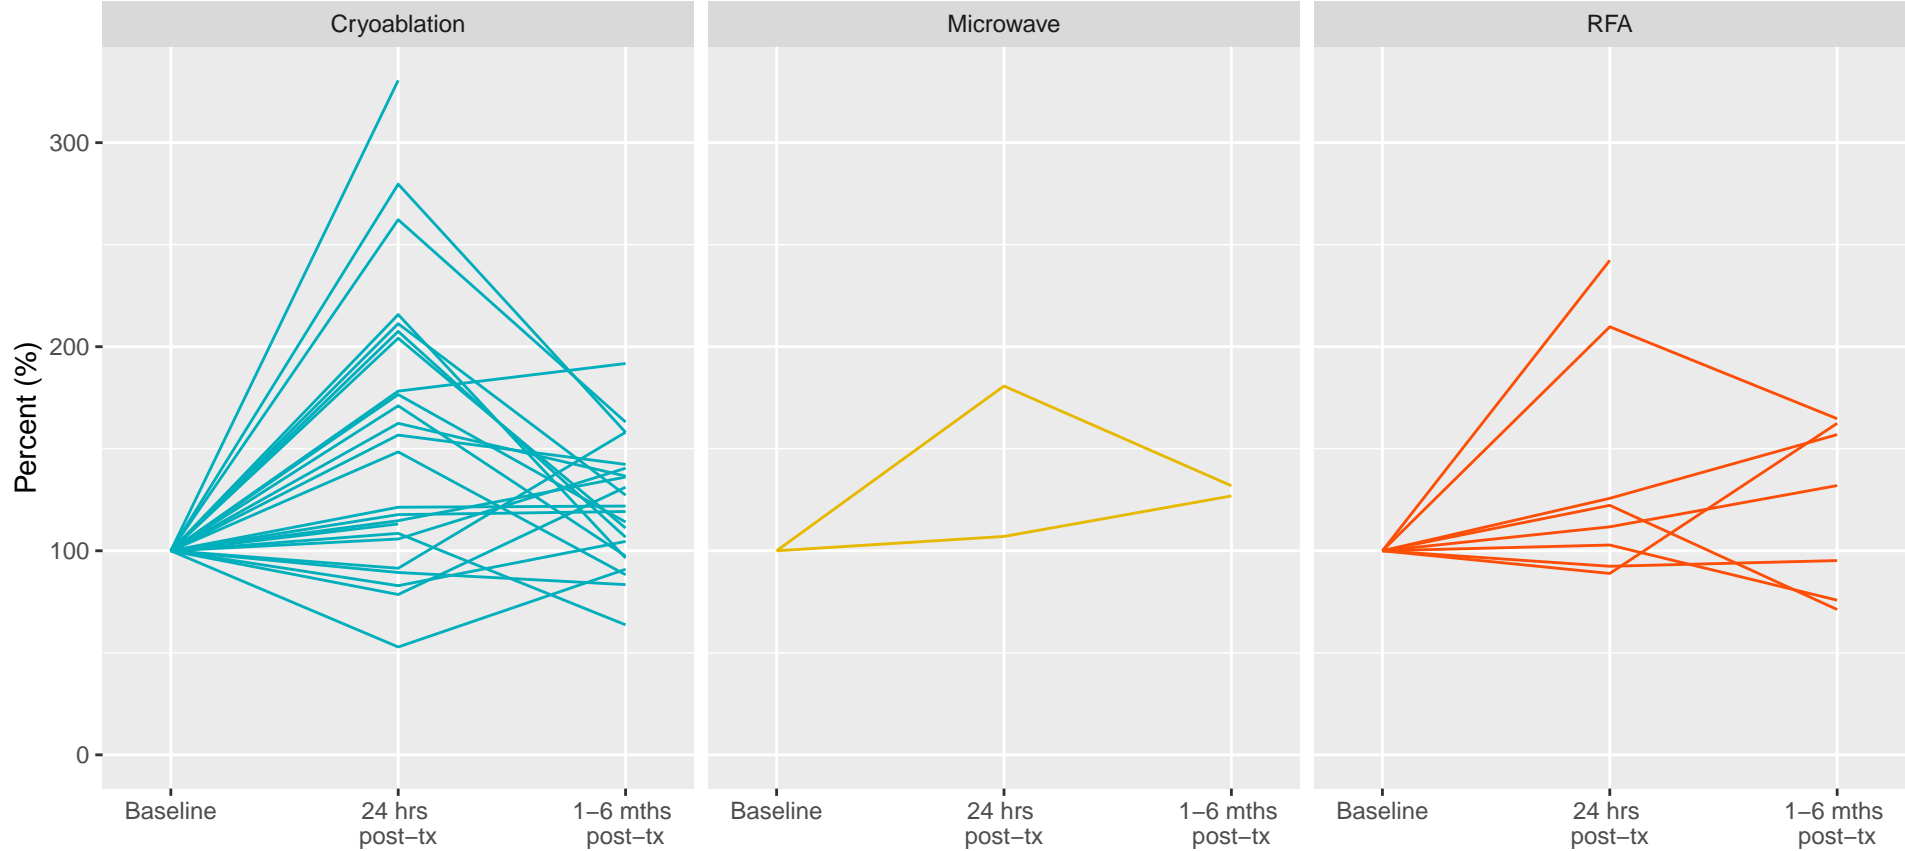

Uniprot ID: P49763, analyte: PGF

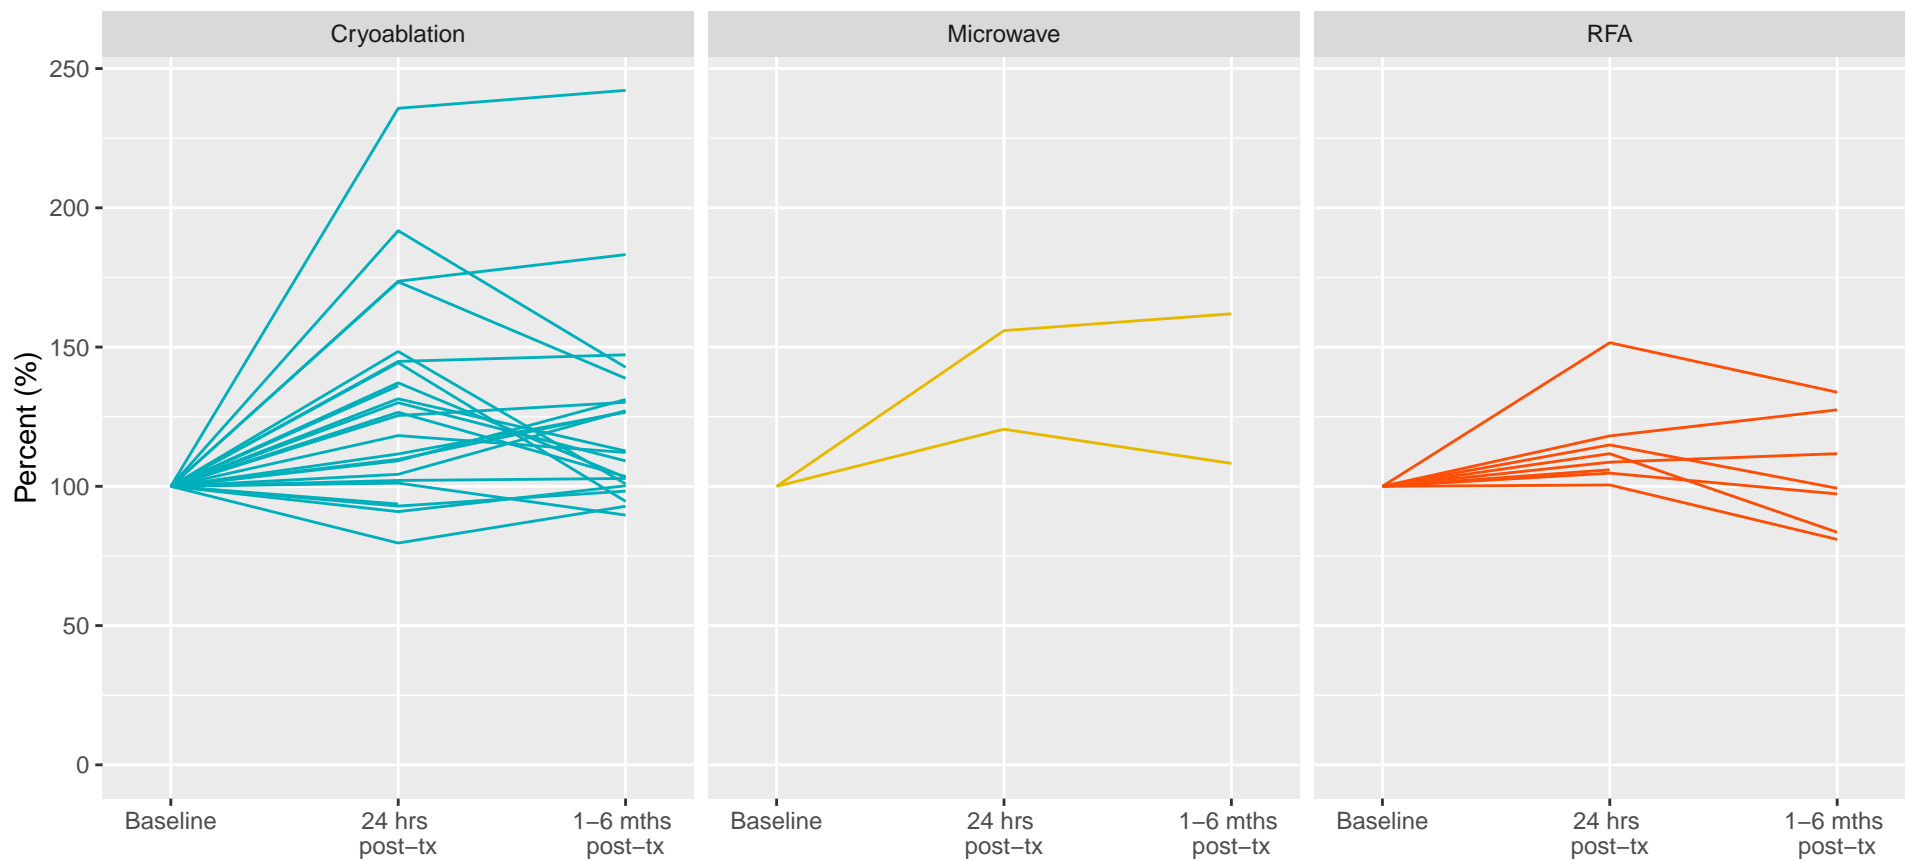

## Uniprot ID: P05231, analyte: IL6

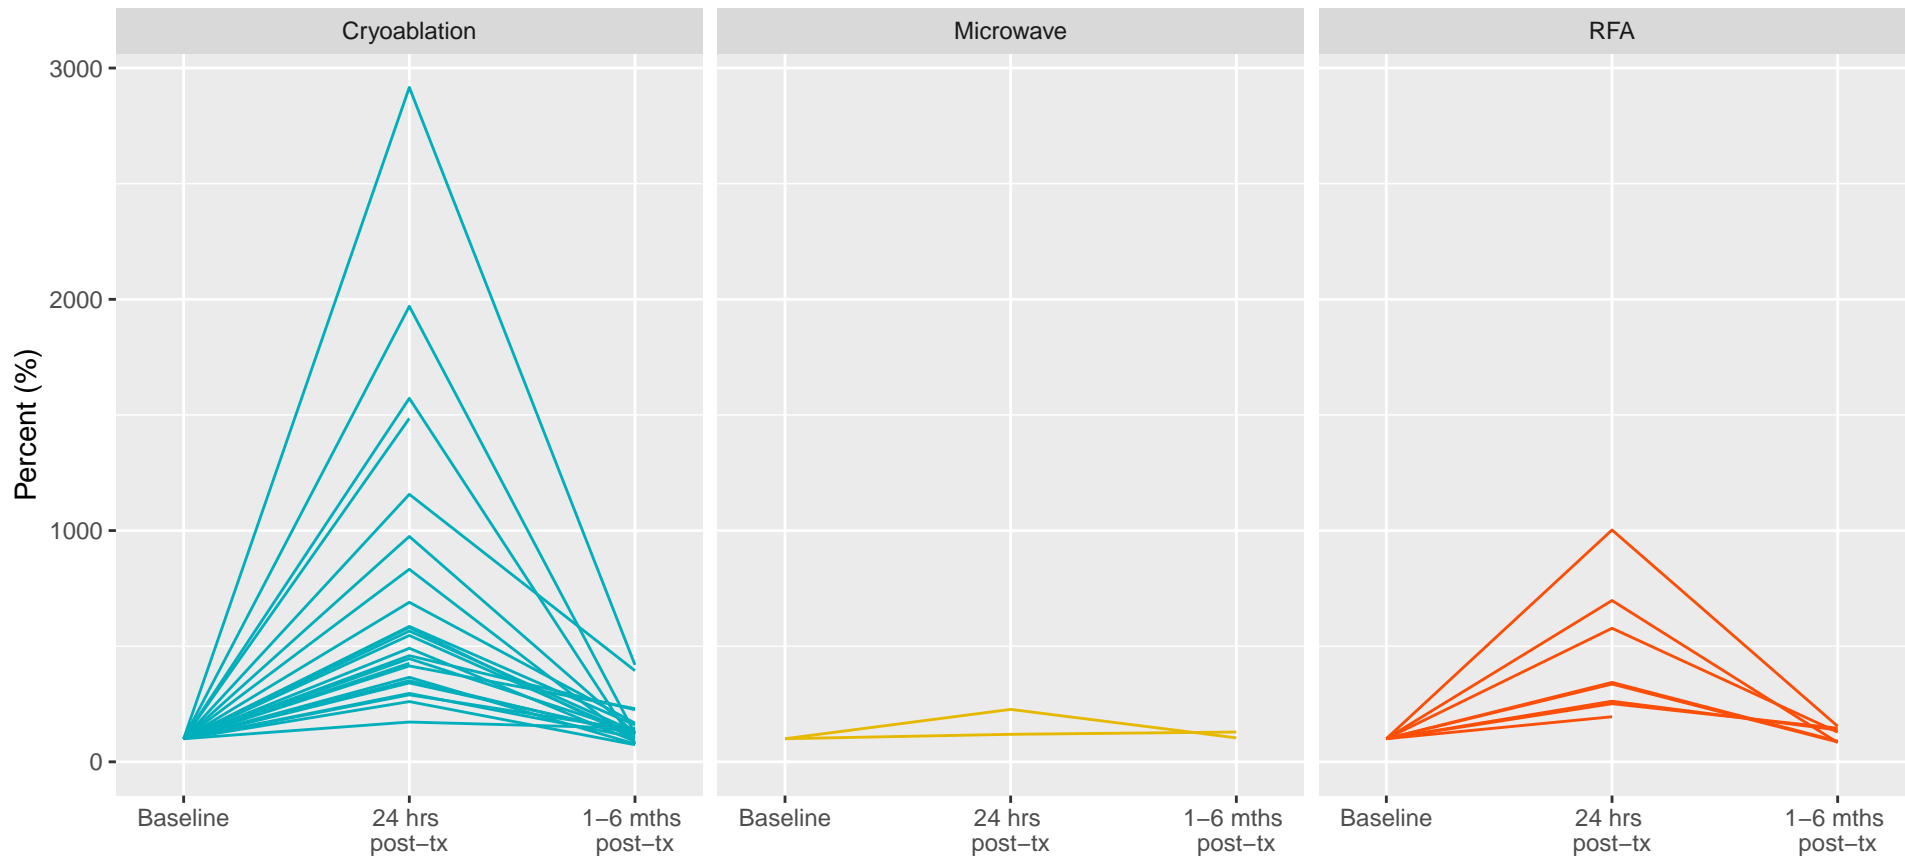

Uniprot ID: Q16790, analyte: CAIX

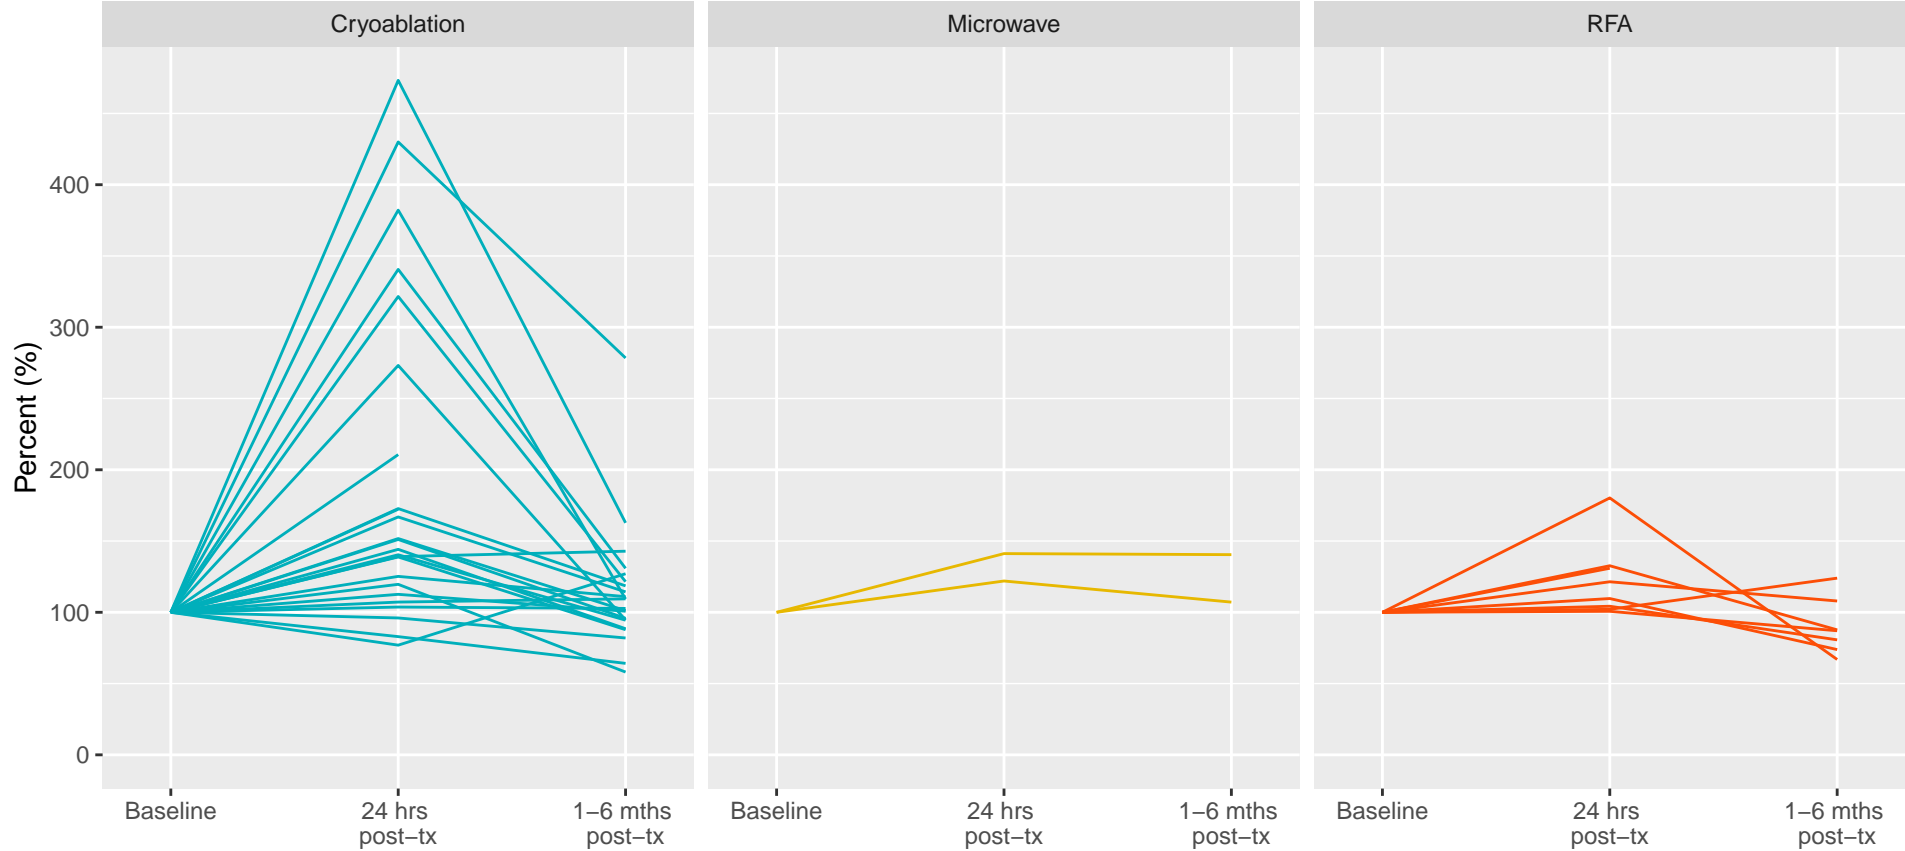

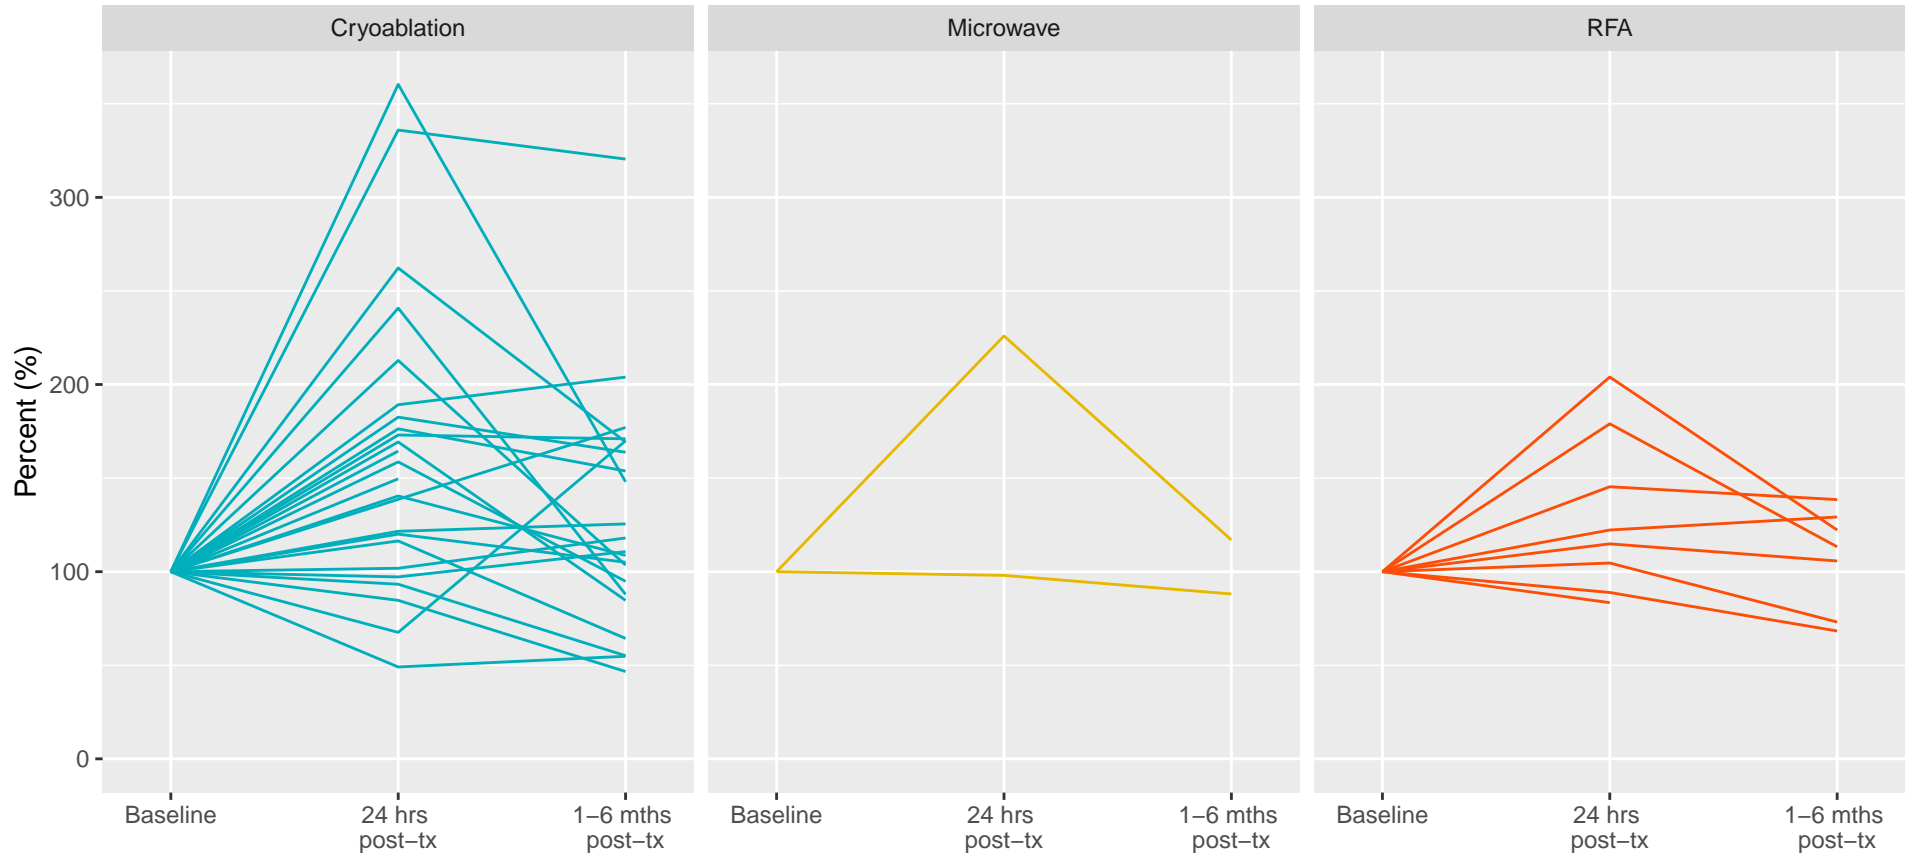

Uniprot ID: P40933, analyte: IL15

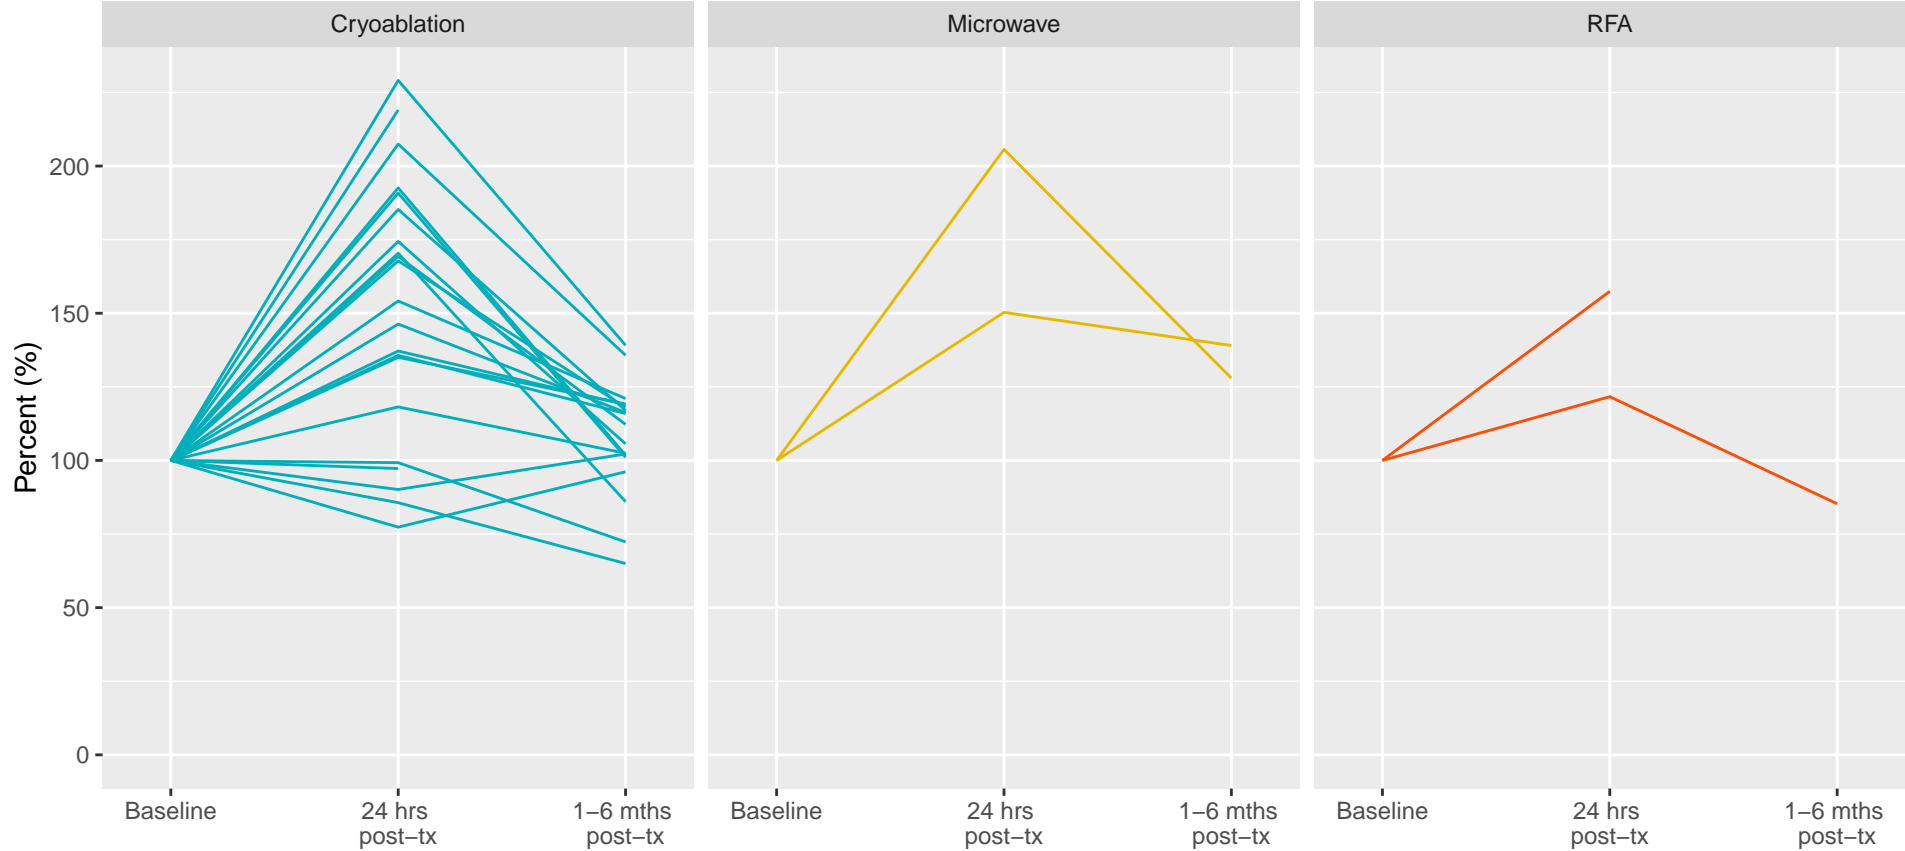



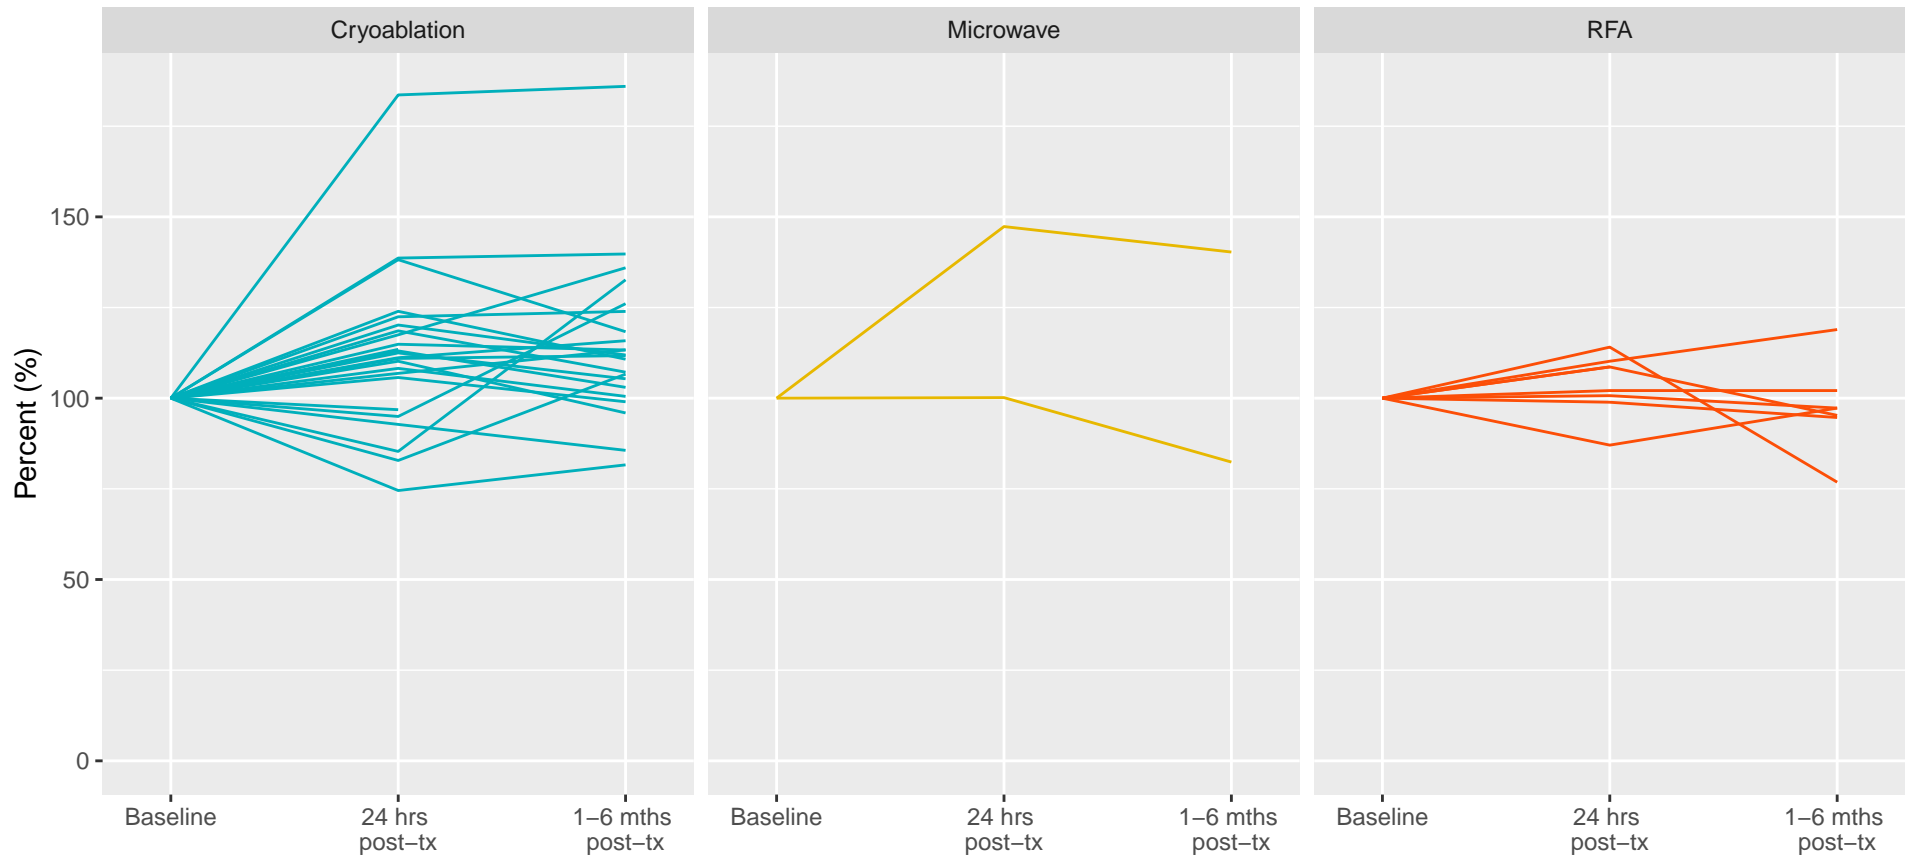

## Uniprot ID: P26842, analyte: CD27

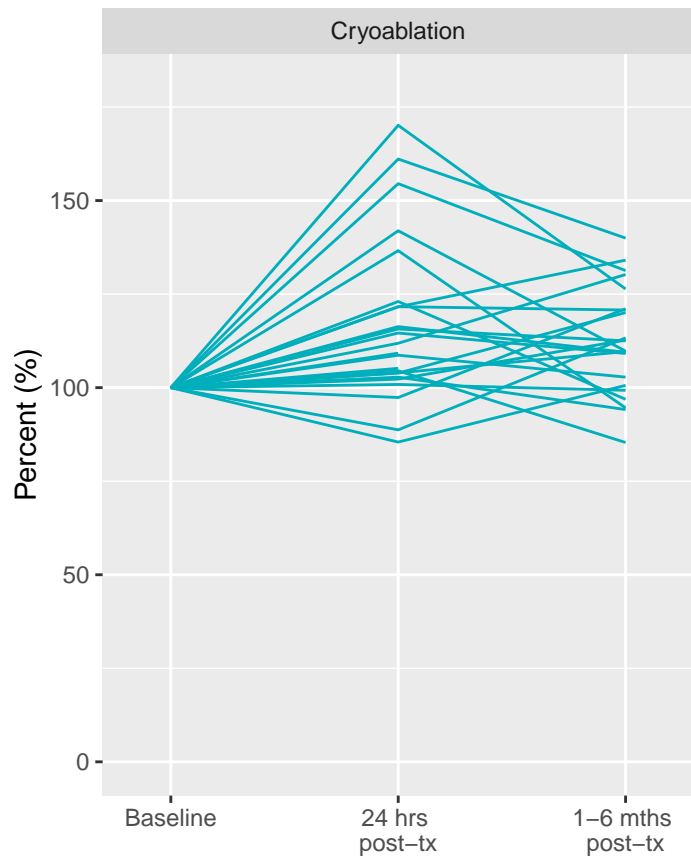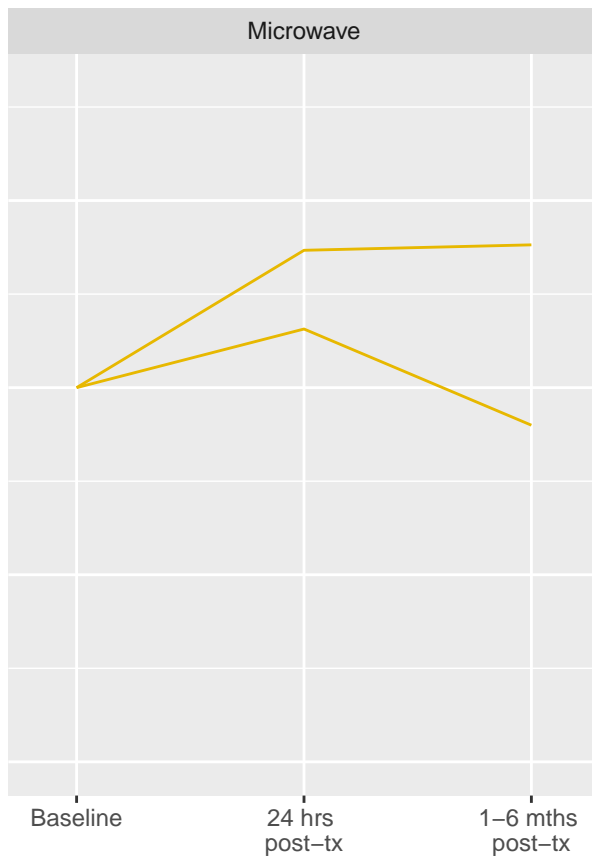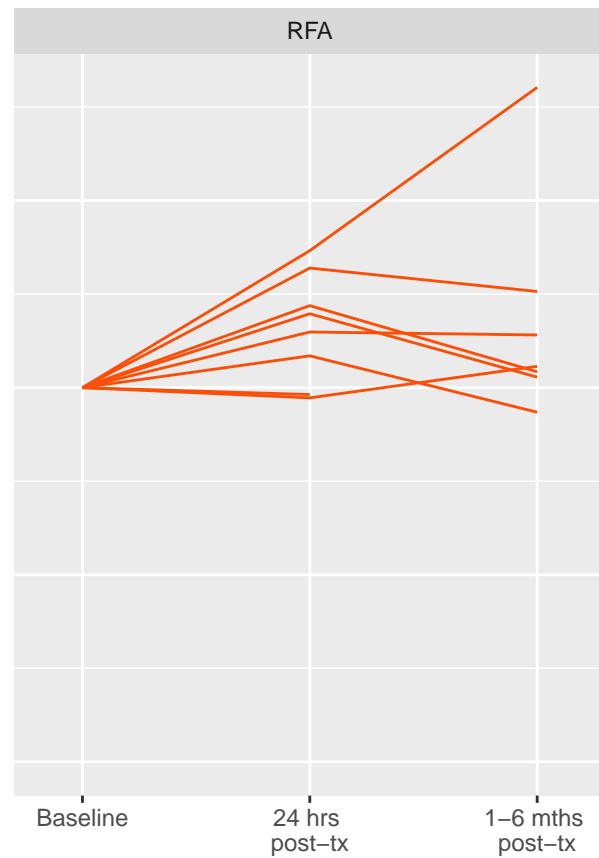

Uniprot ID: P14210, analyte: HGF

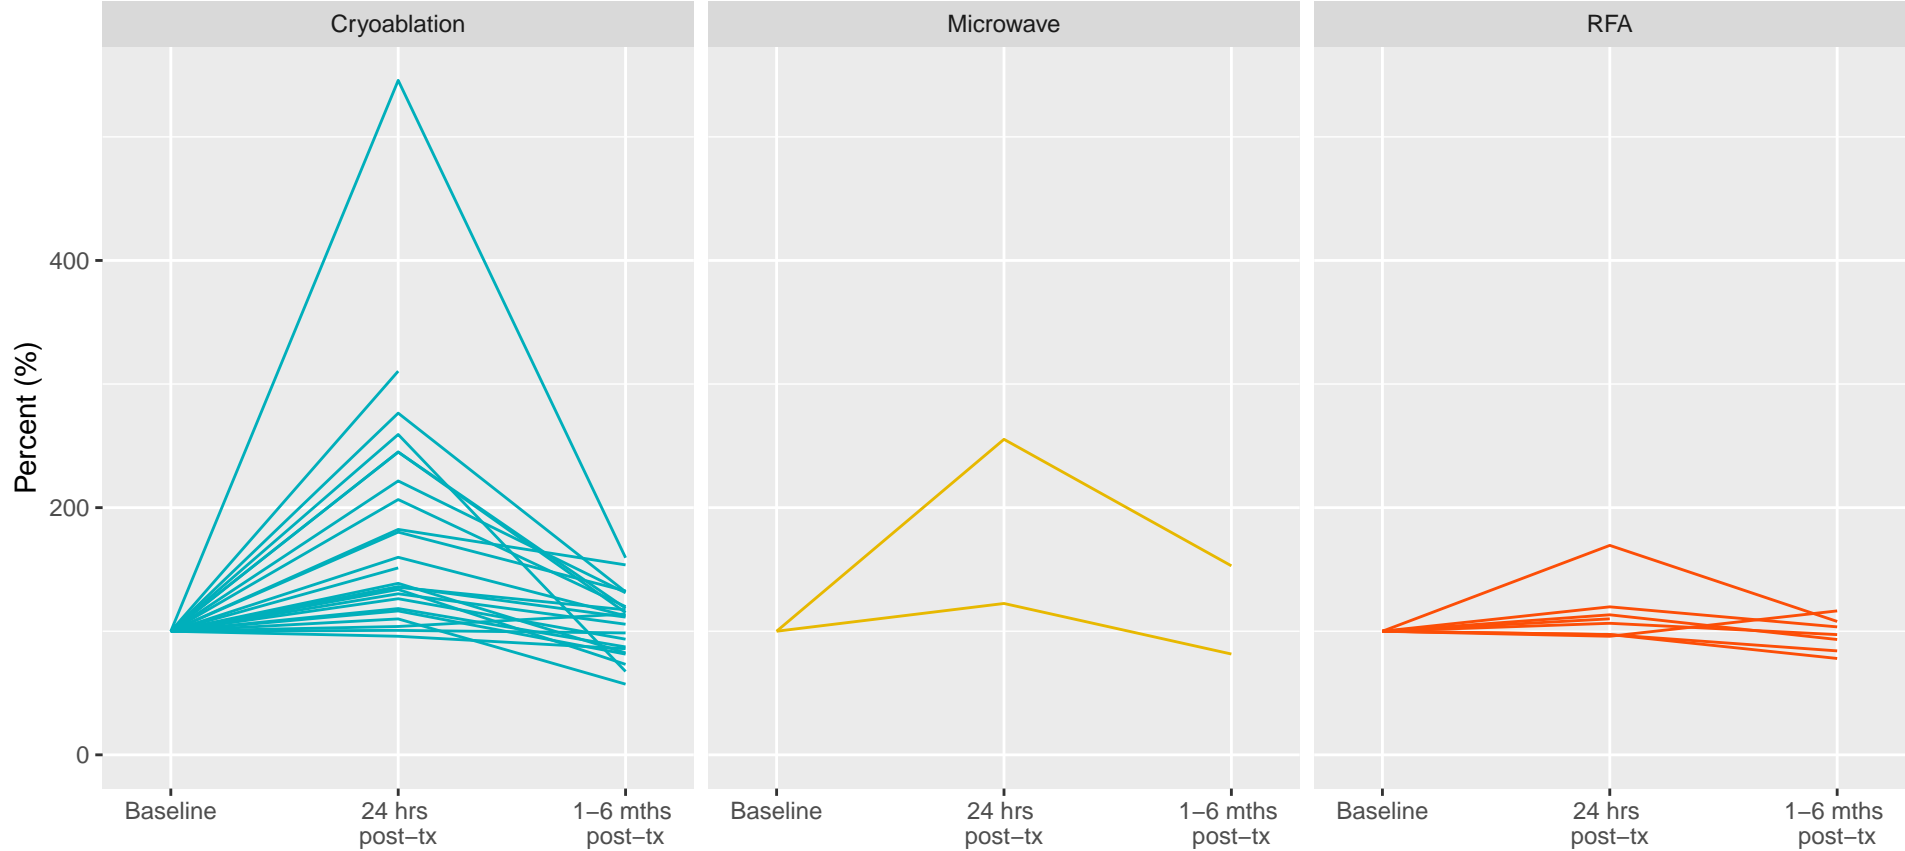

Uniprot ID: P09601, analyte: HO-1

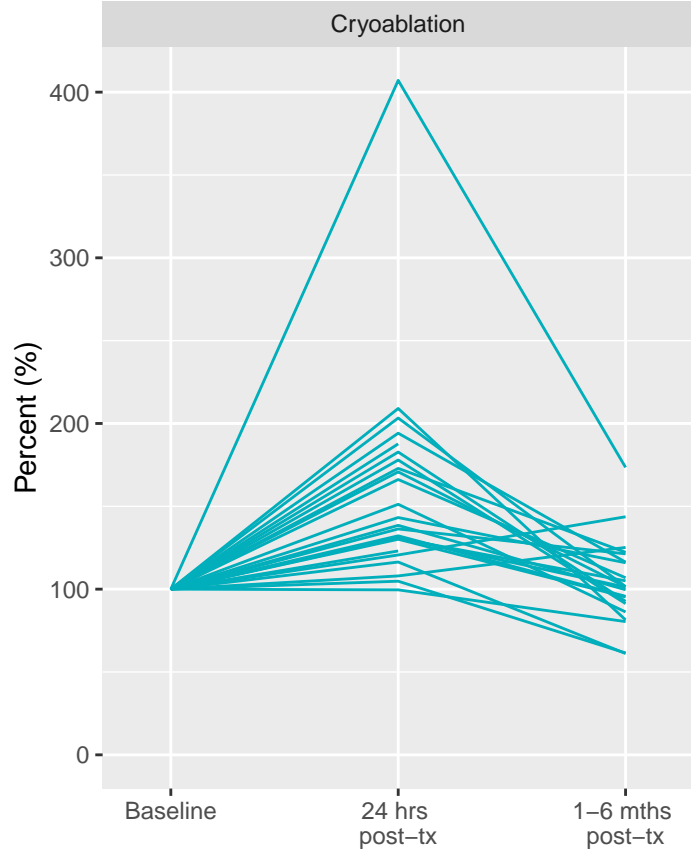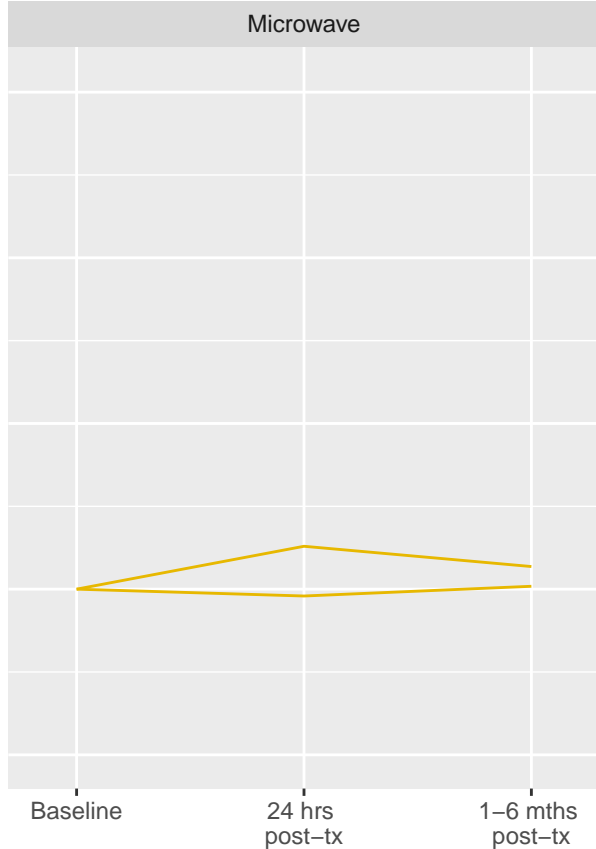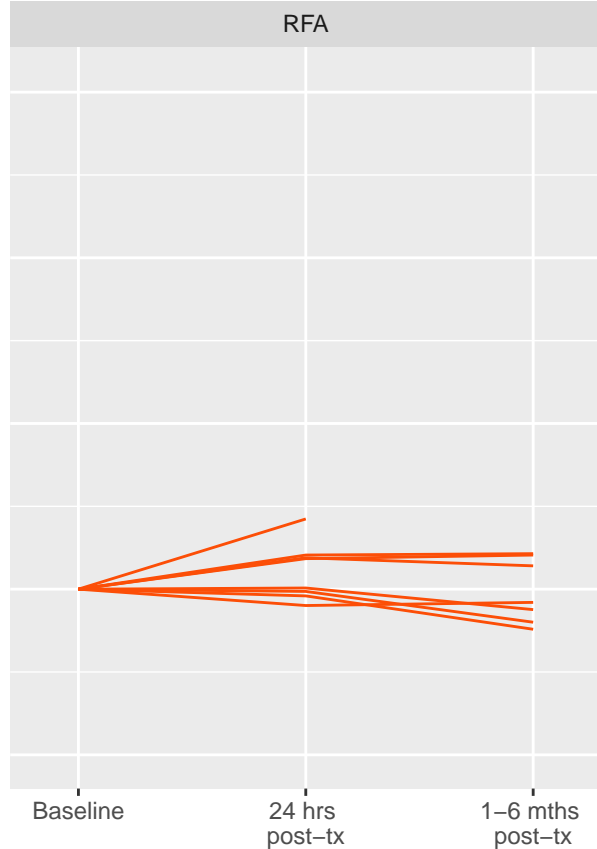

# Uniprot ID: P22301, analyte: IL10

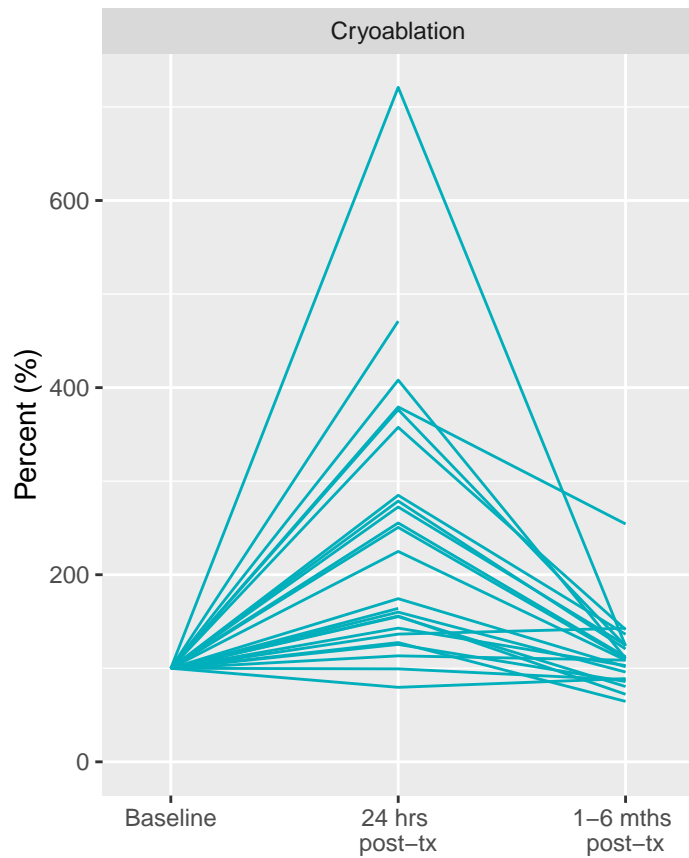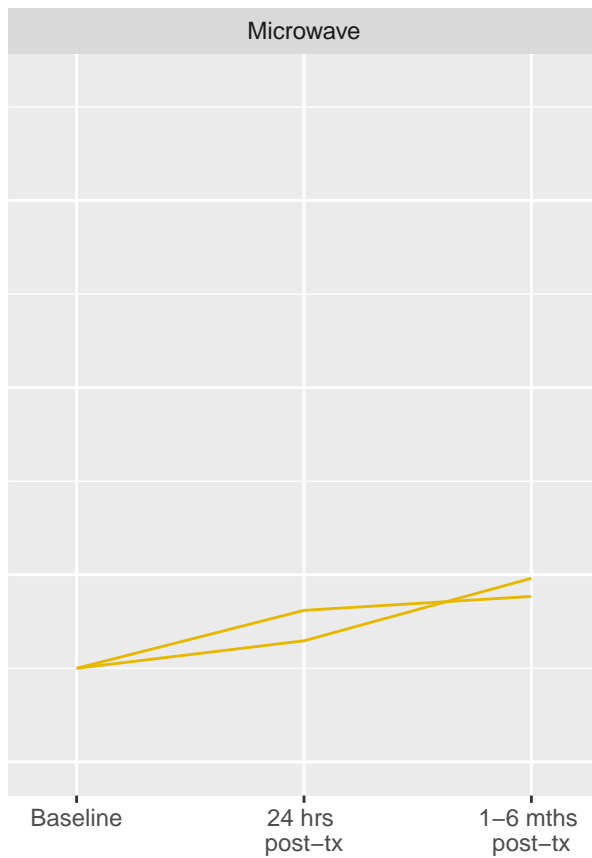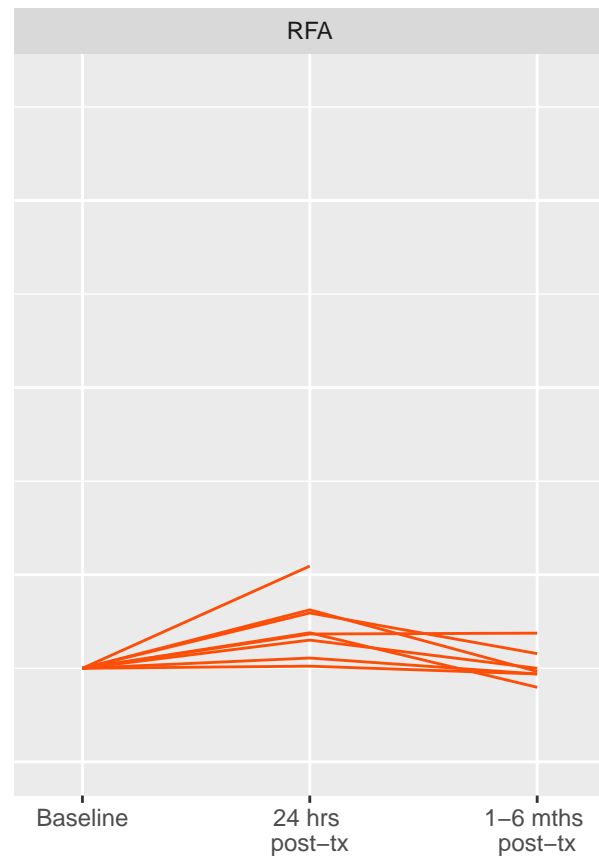

# Uniprot ID: P55773, analyte: CCL23

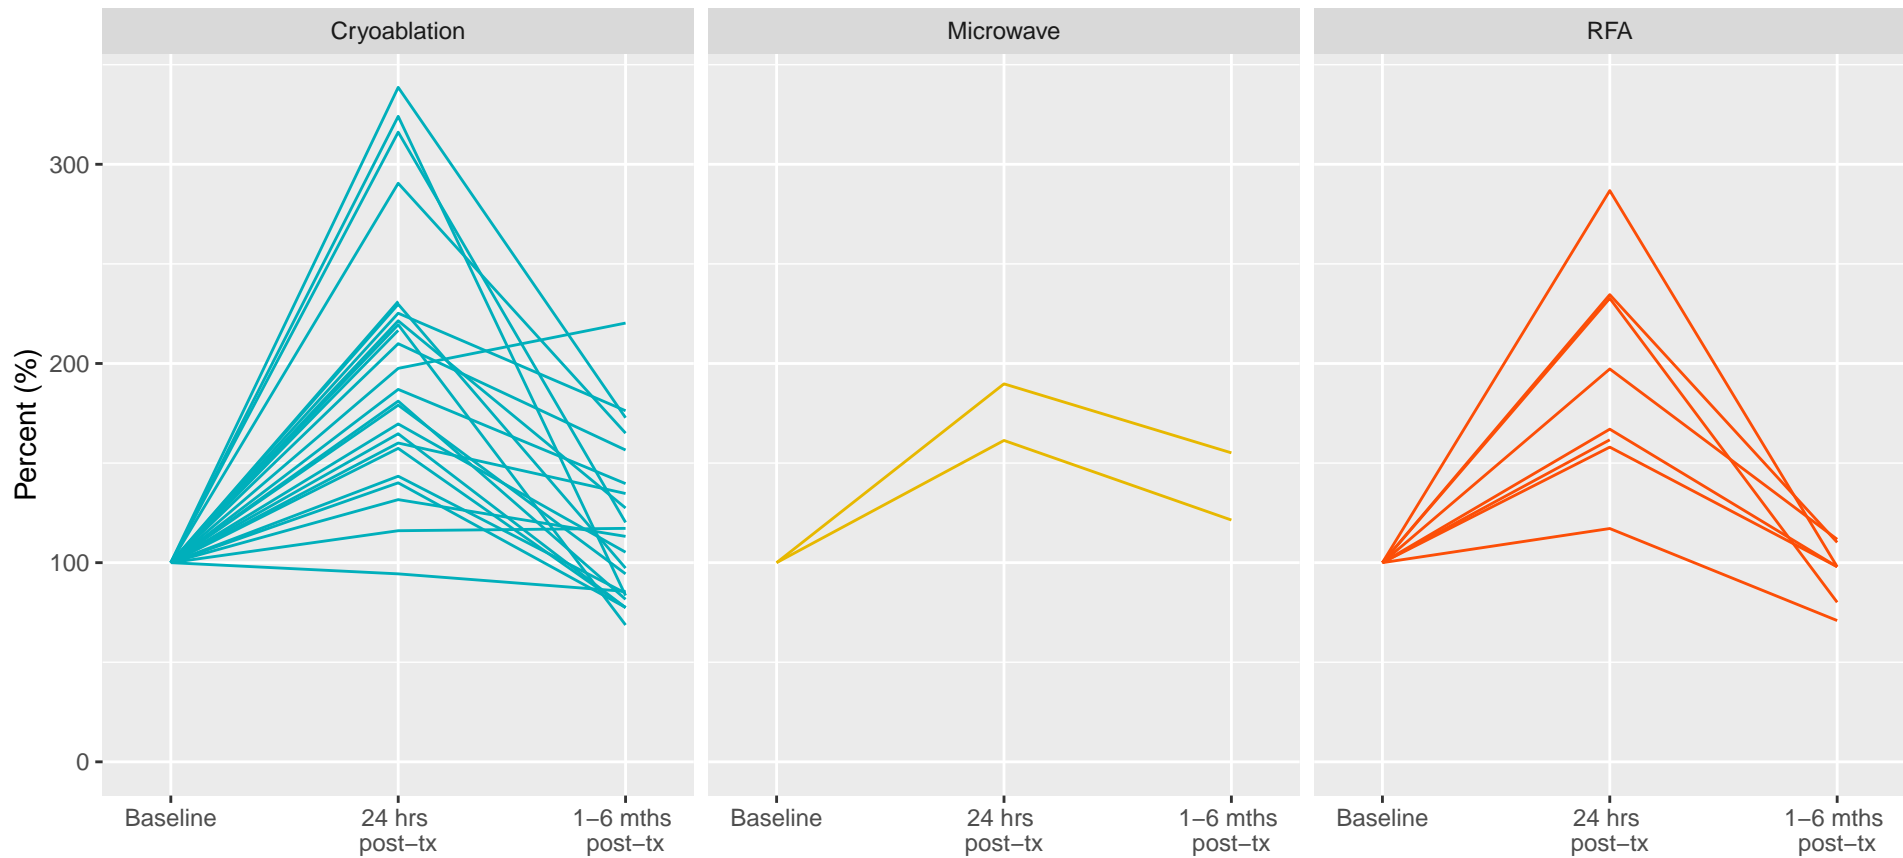

# Uniprot ID: P06127, analyte: CD5

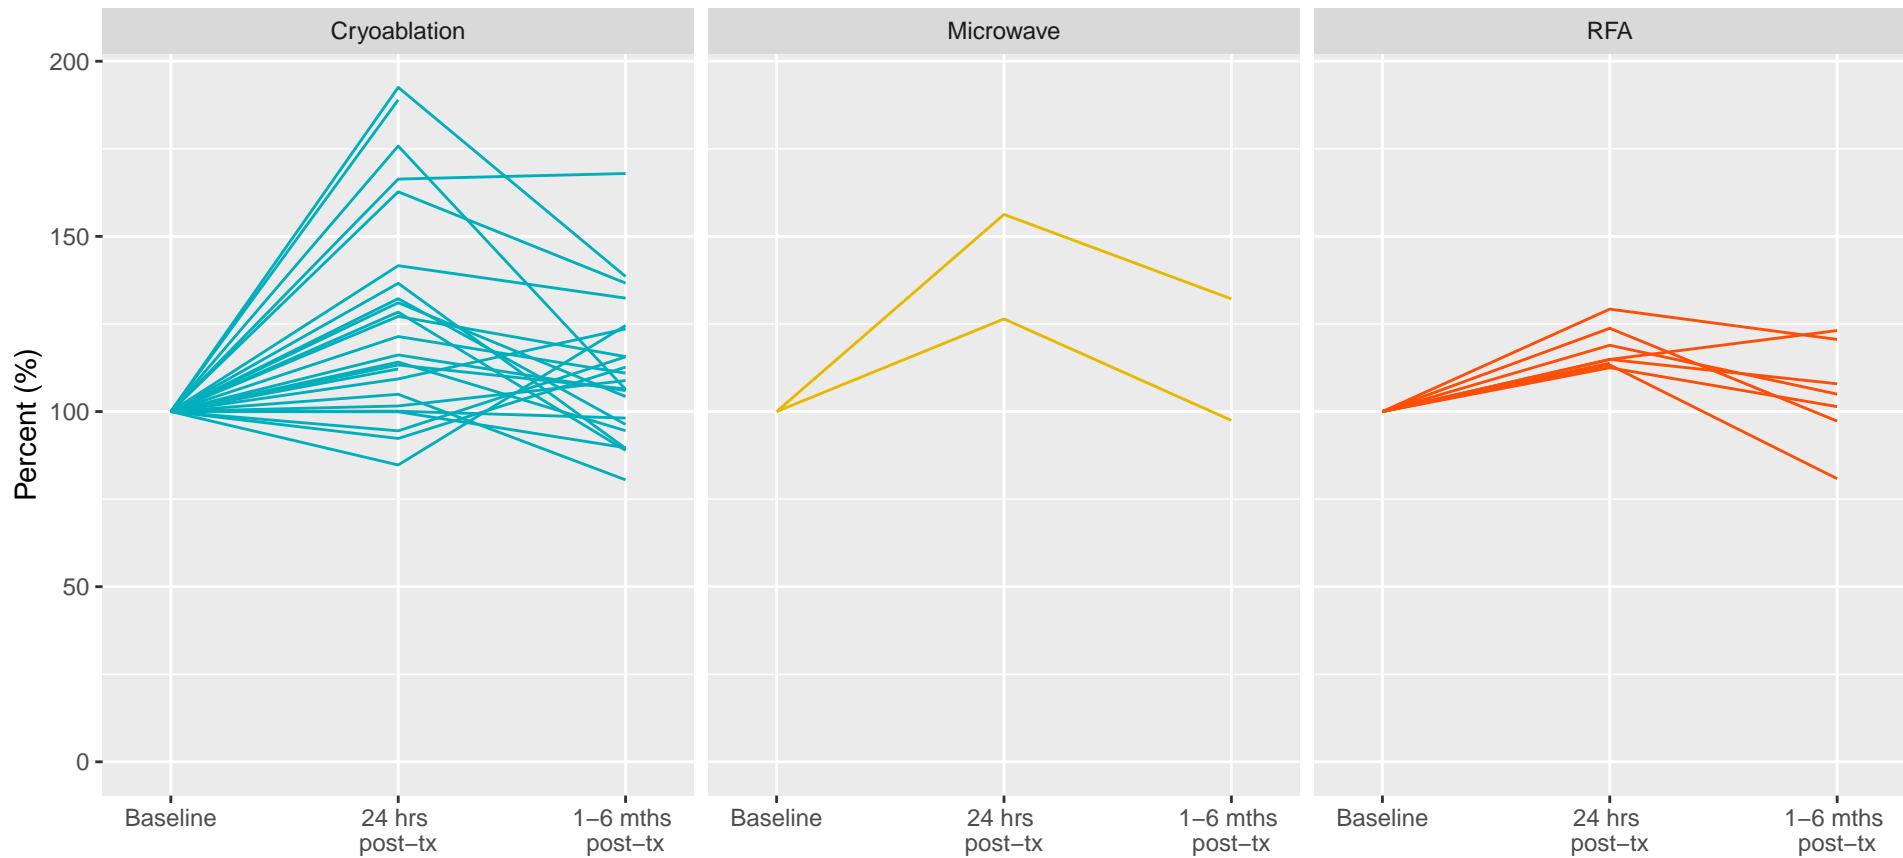

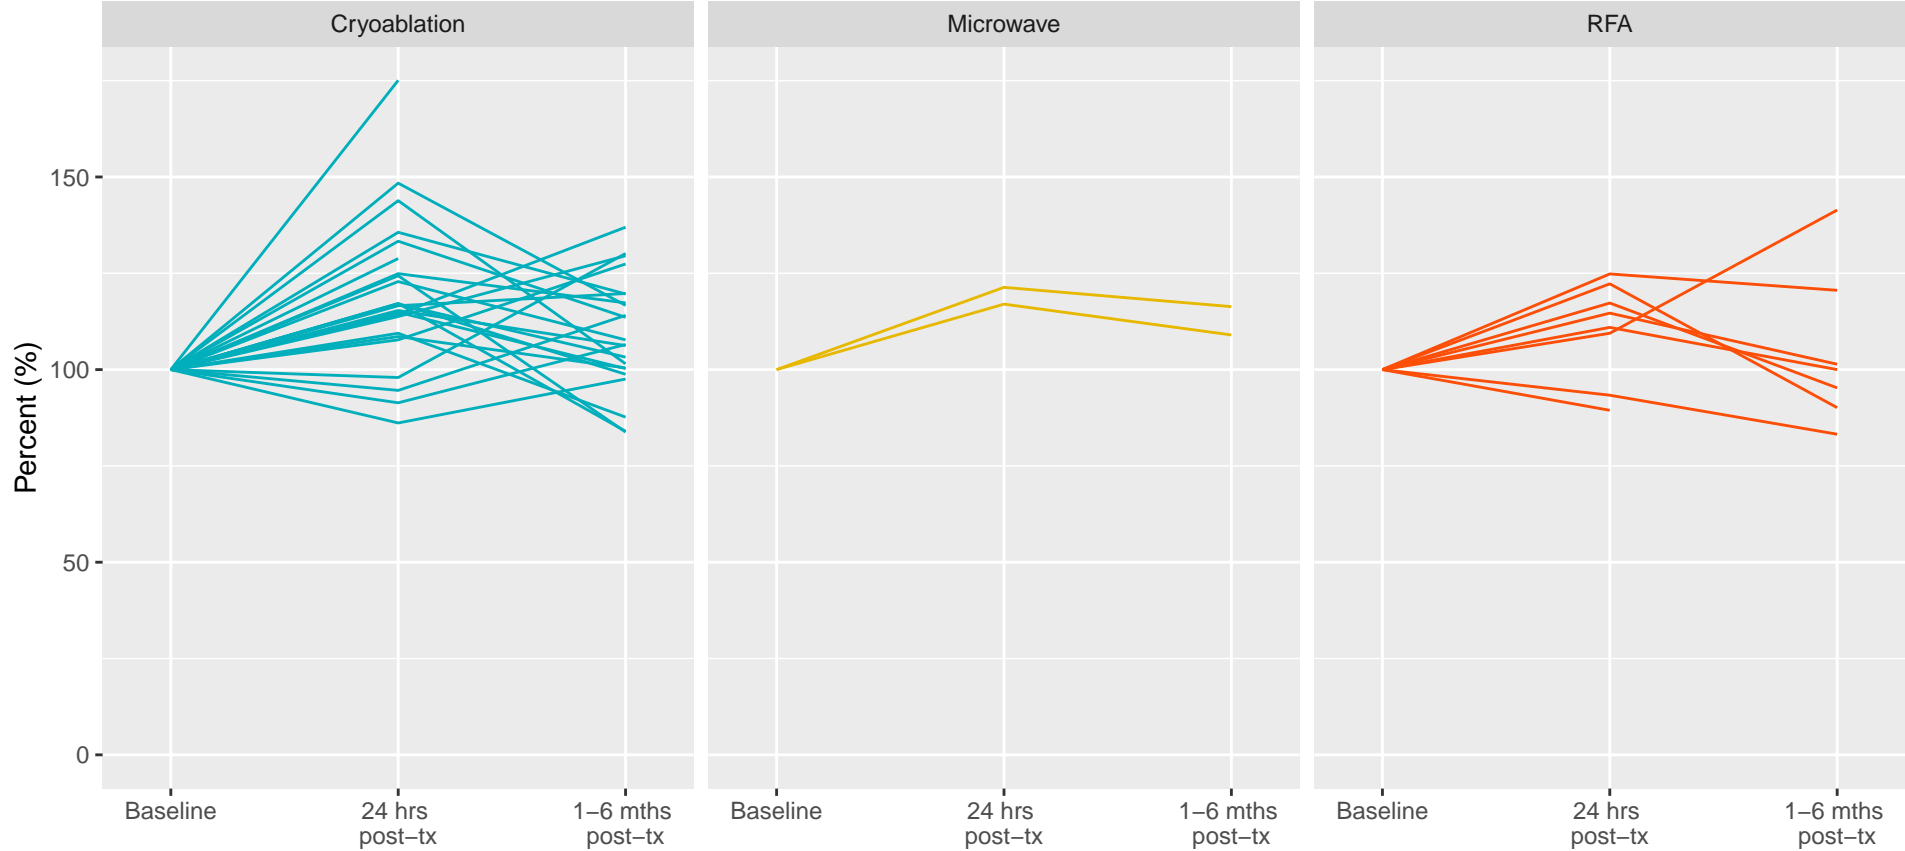



# Uniprot ID: P21246, analyte: PTN

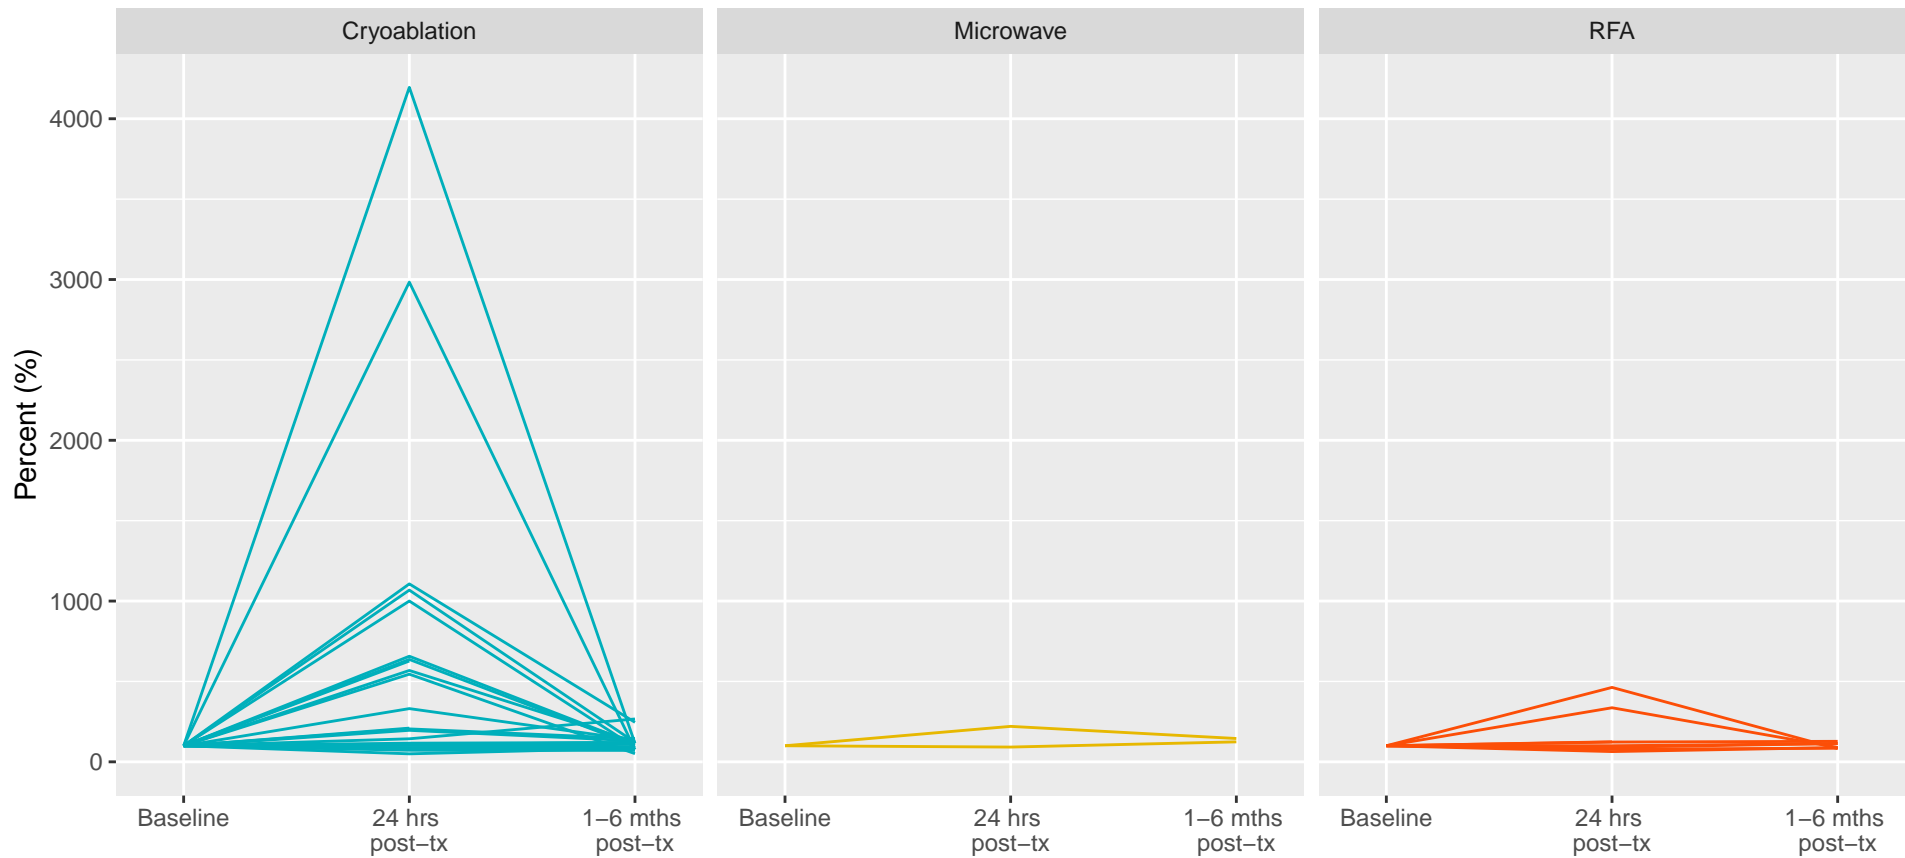

Uniprot ID: P15692, analyte: VEGFA

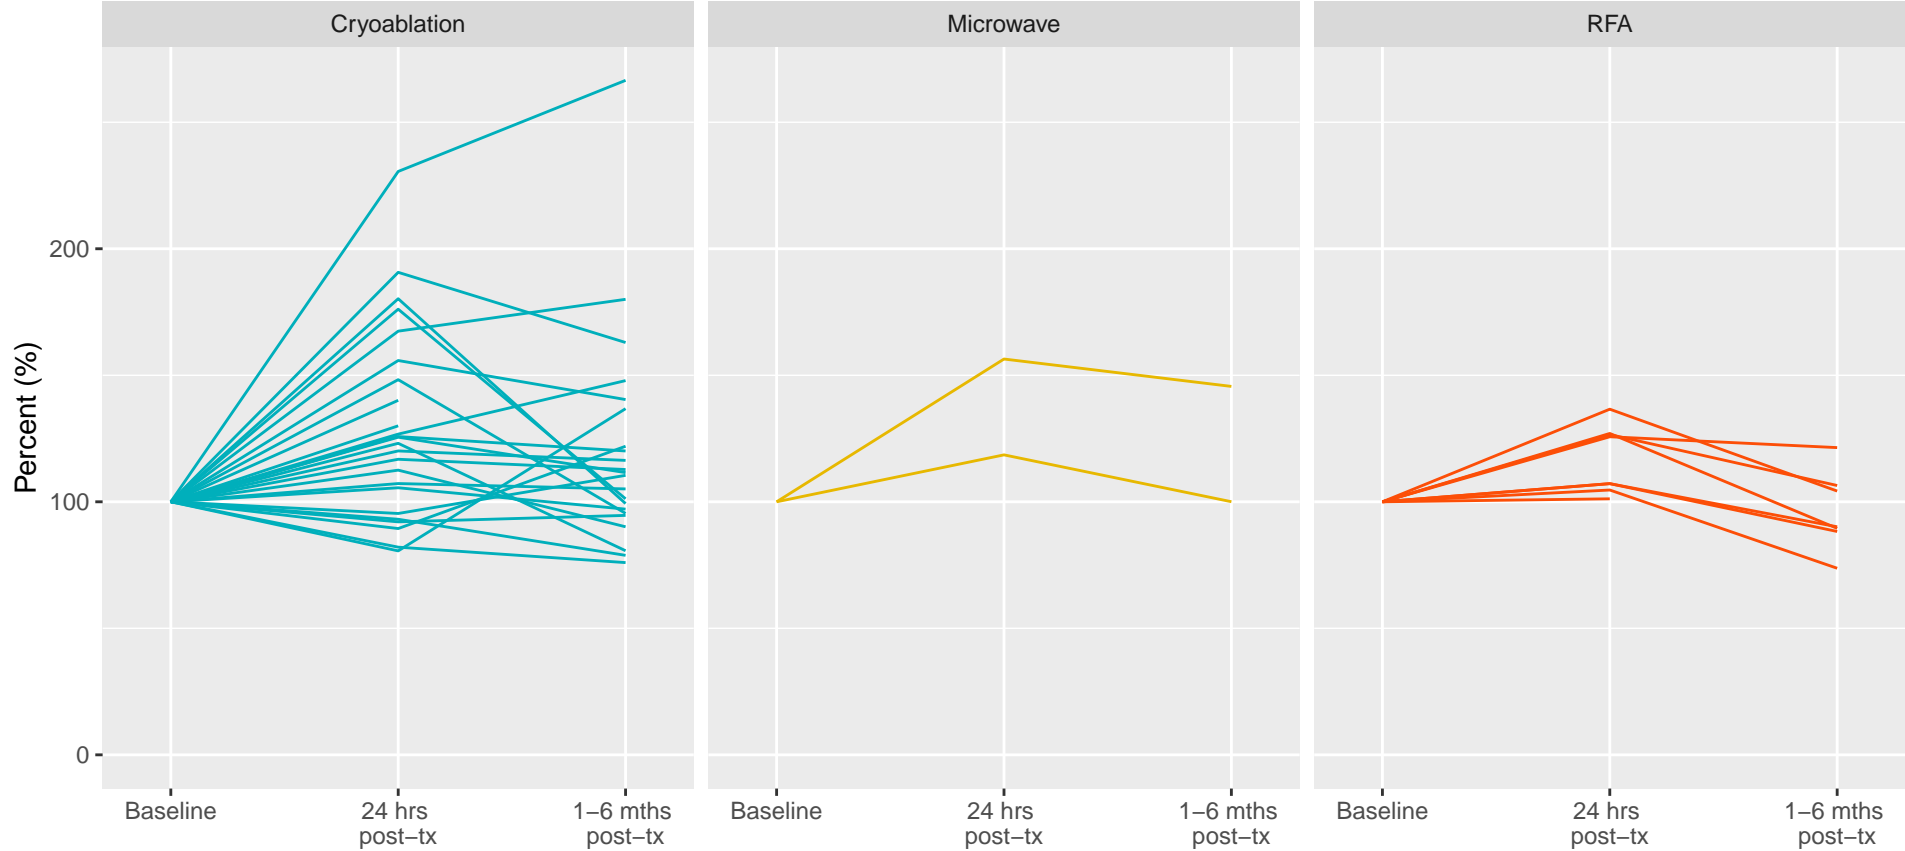

Uniprot ID: P09603, analyte: CSF-1

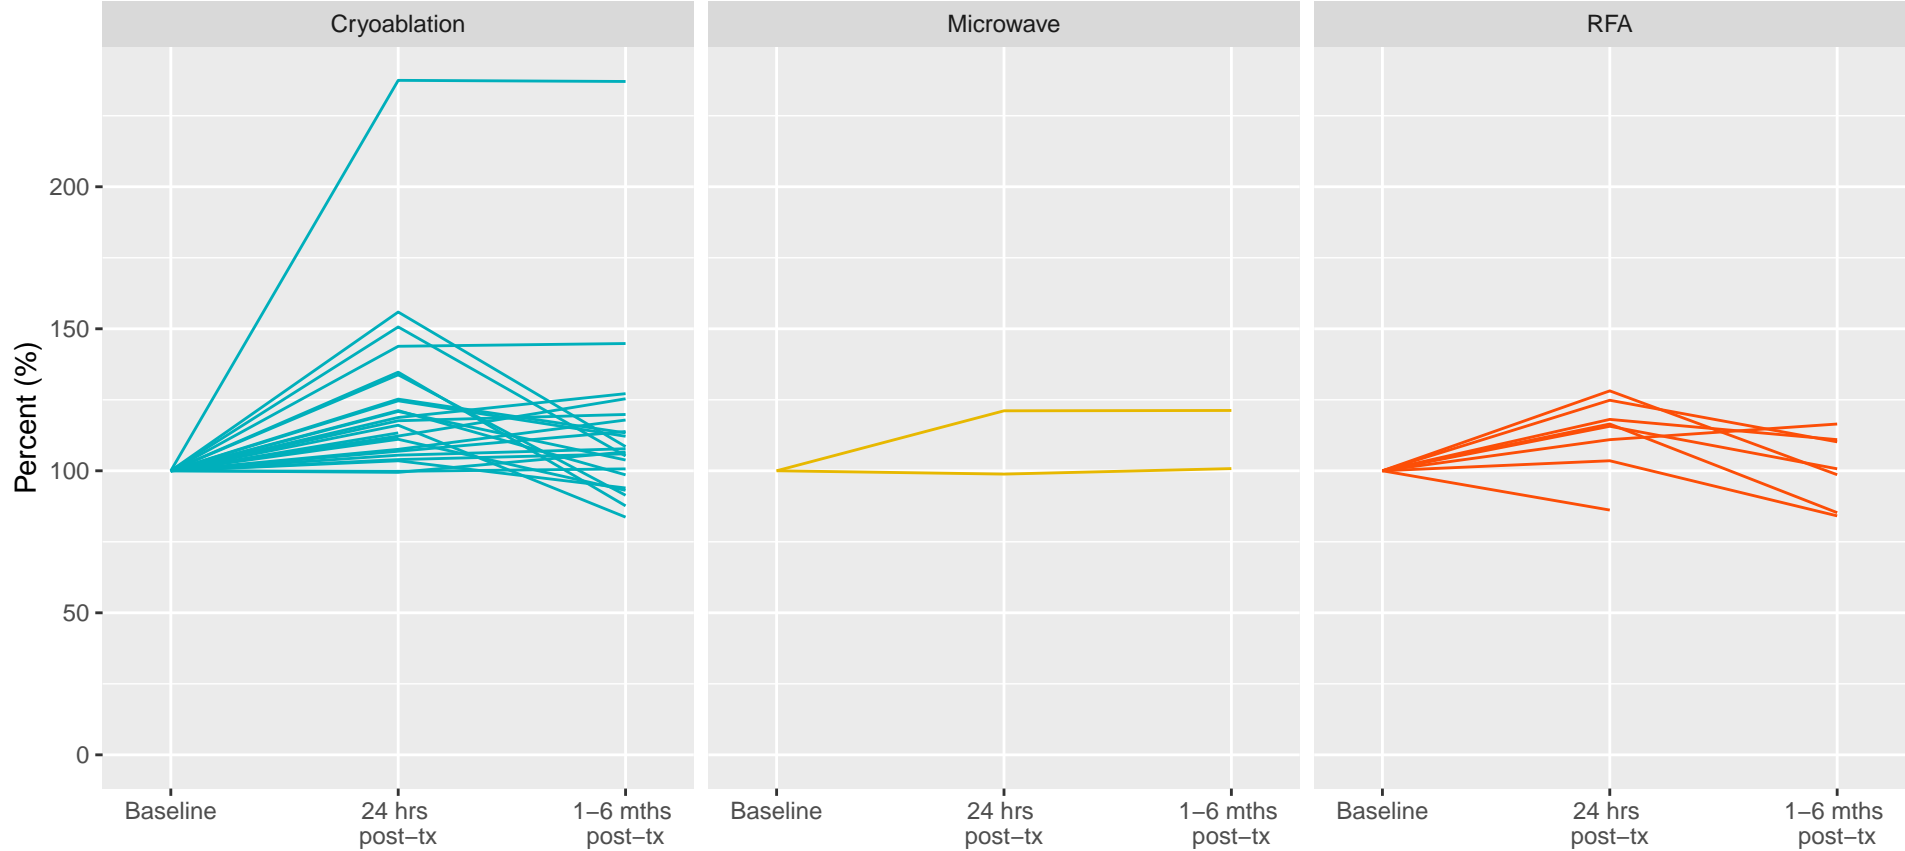

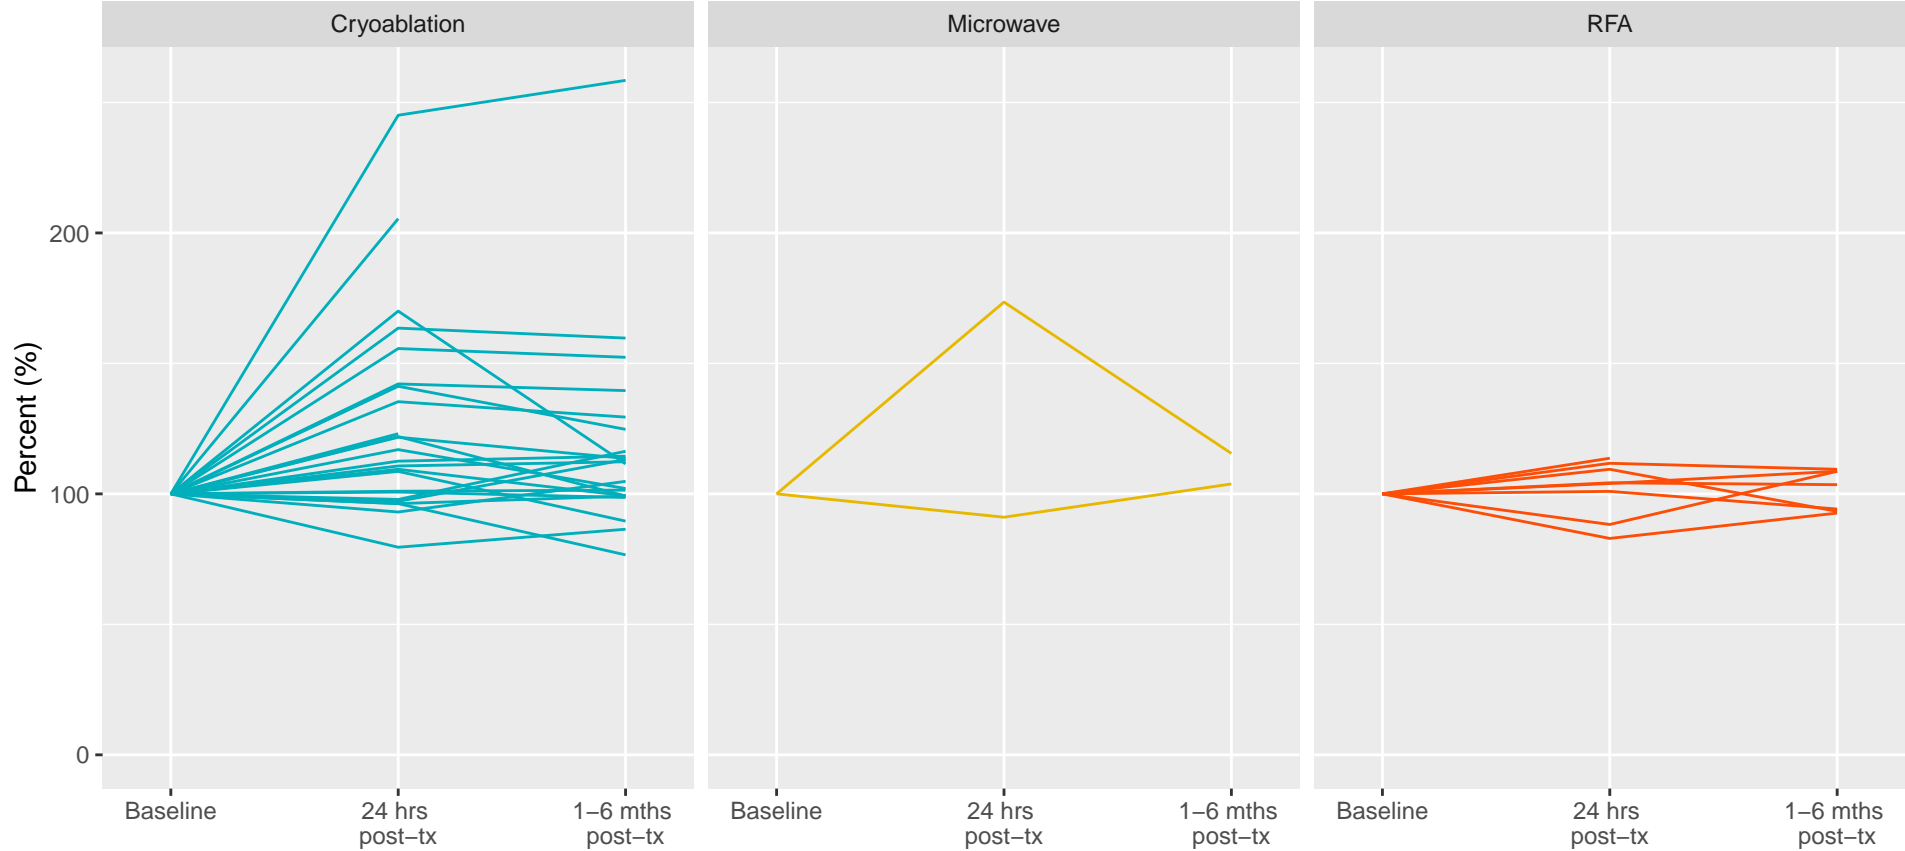

Uniprot ID: P18827, analyte: SYND1

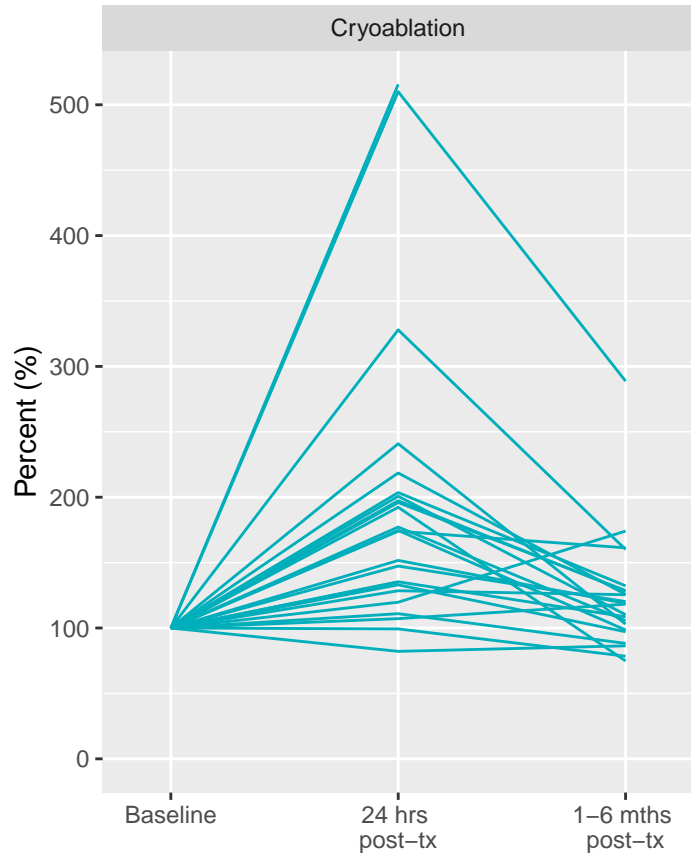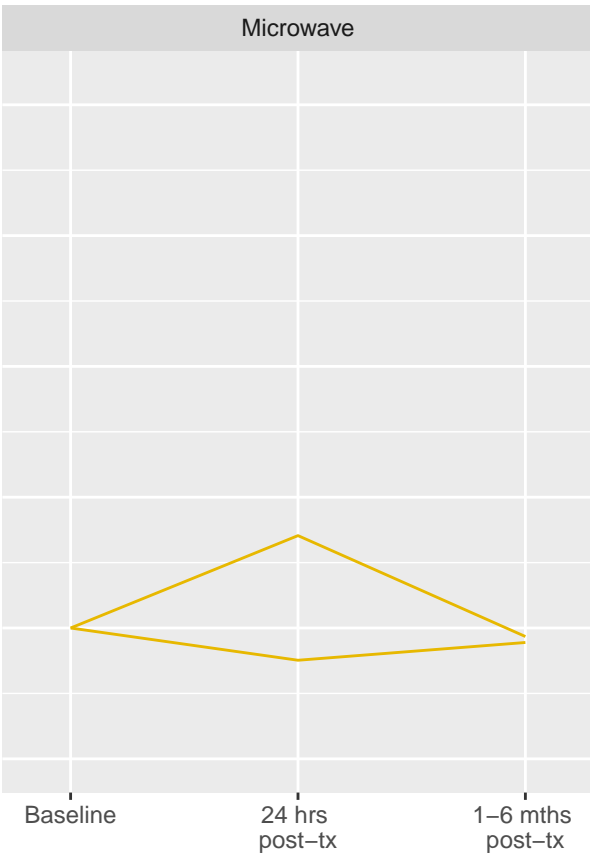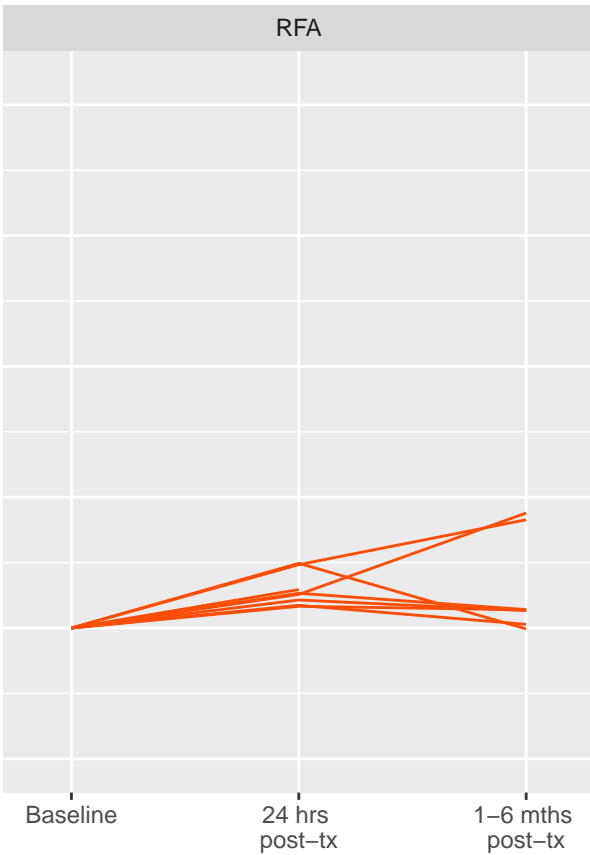

# Uniprot ID: P48307, analyte: TFPI-2

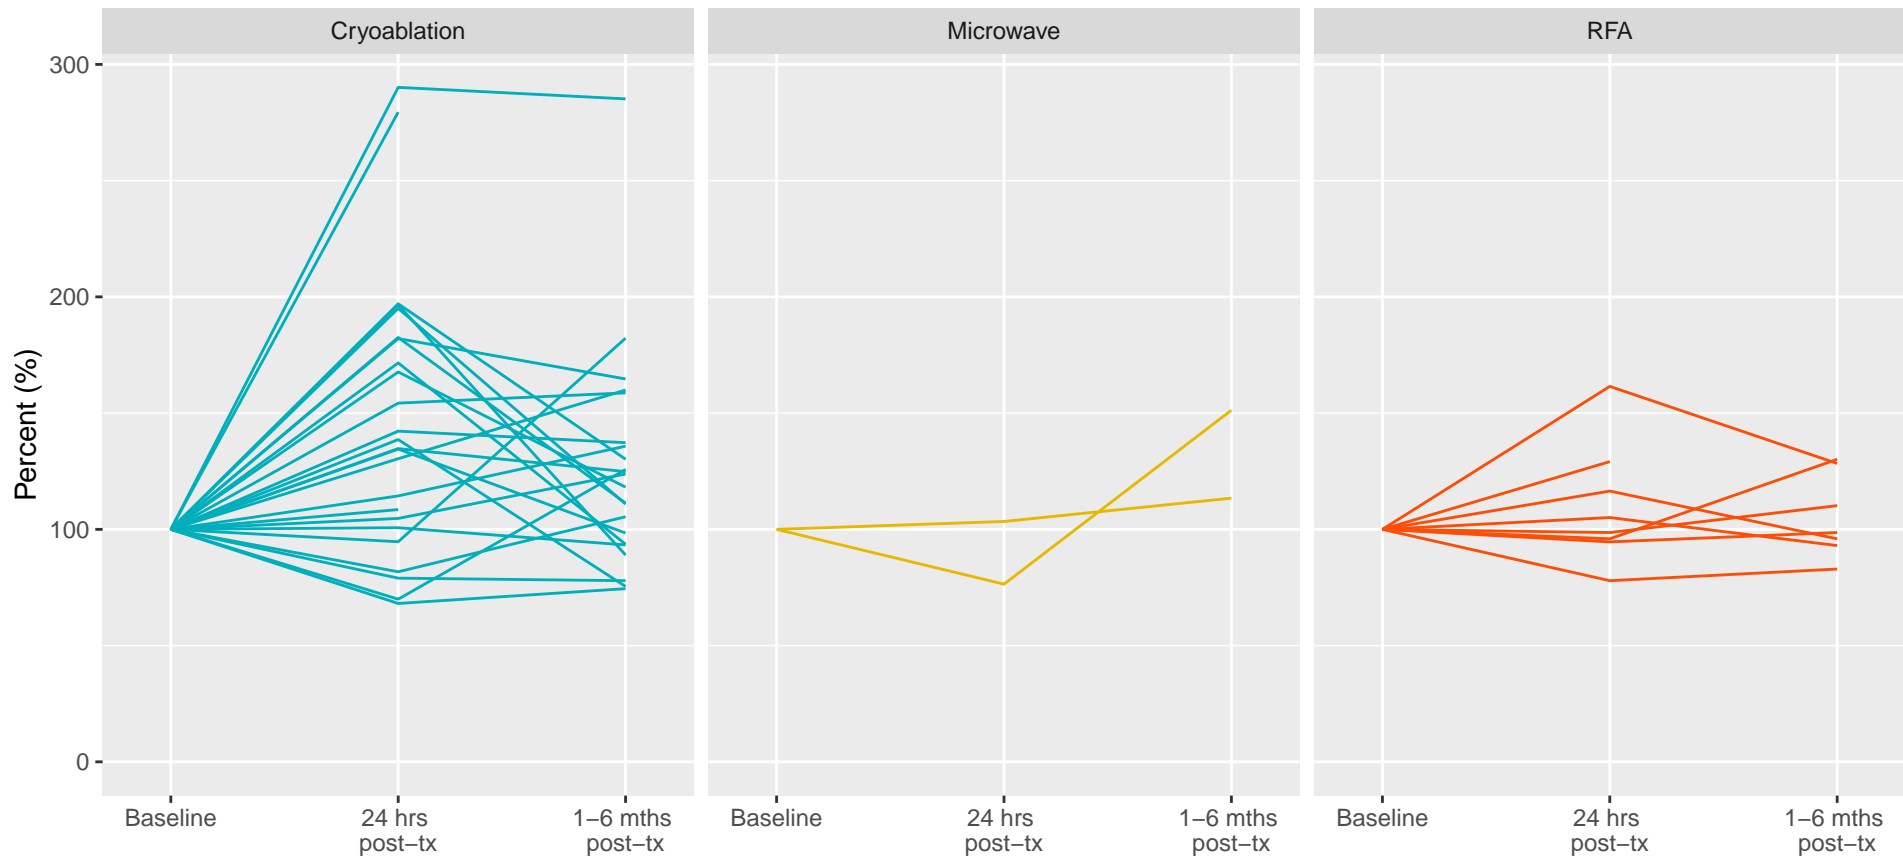

Uniprot ID: P01135, analyte: TGF- $\alpha$

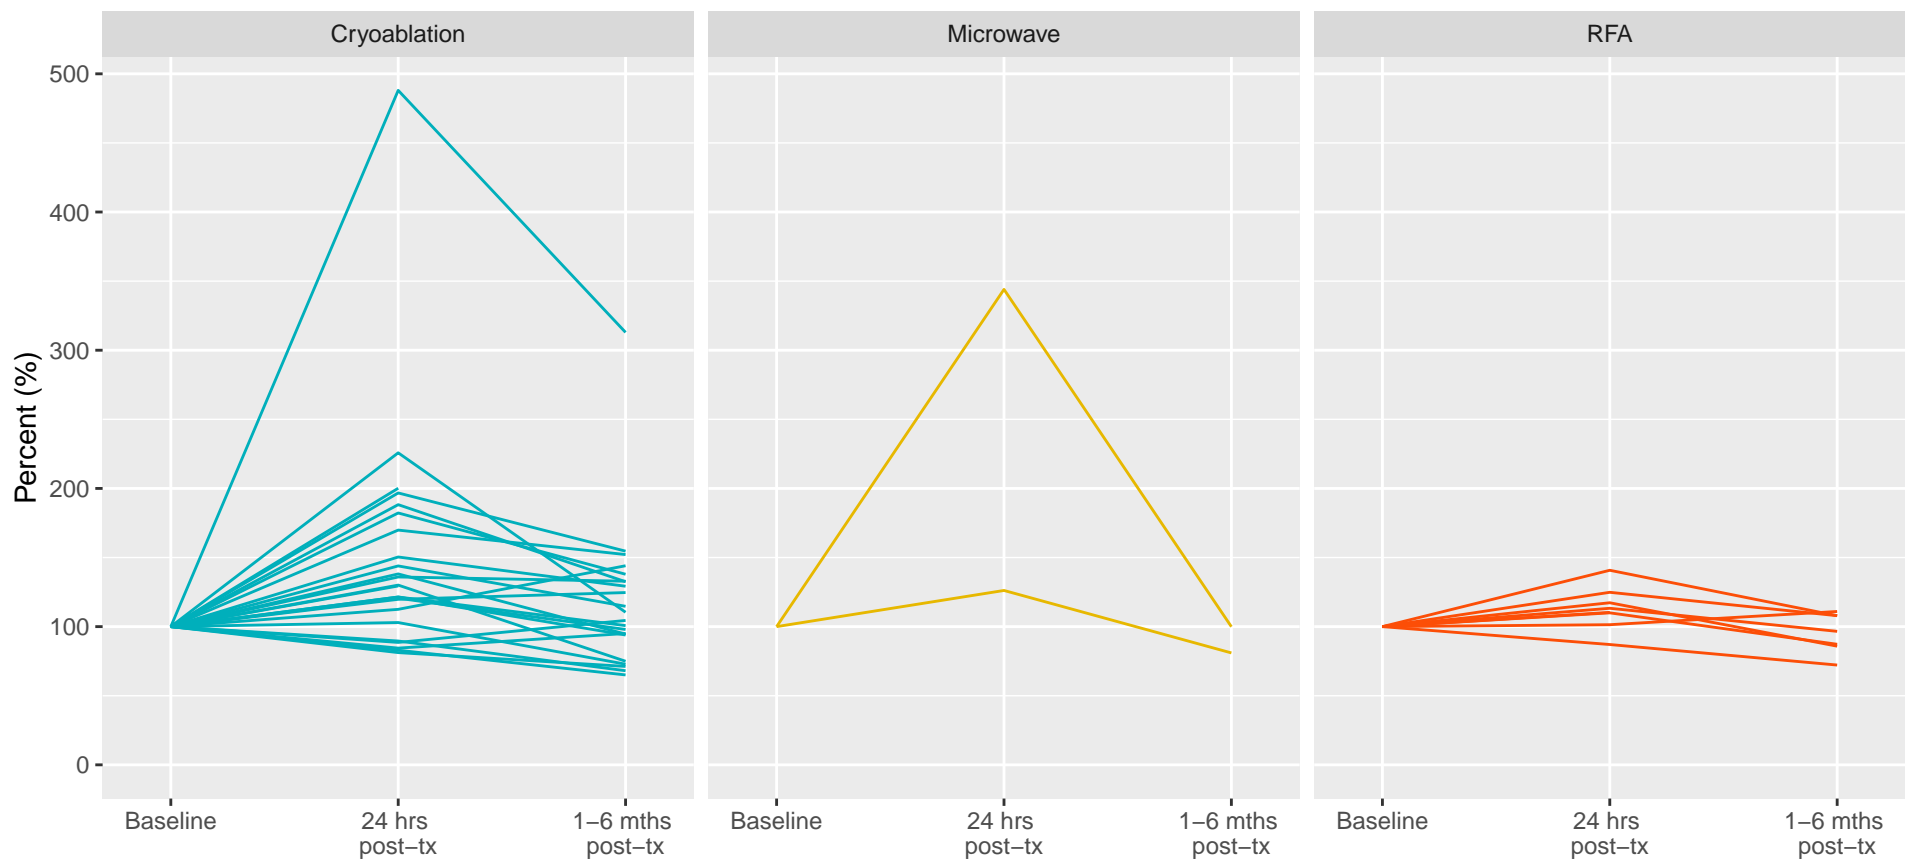

# Uniprot ID: P29317, analyte: EPHA2

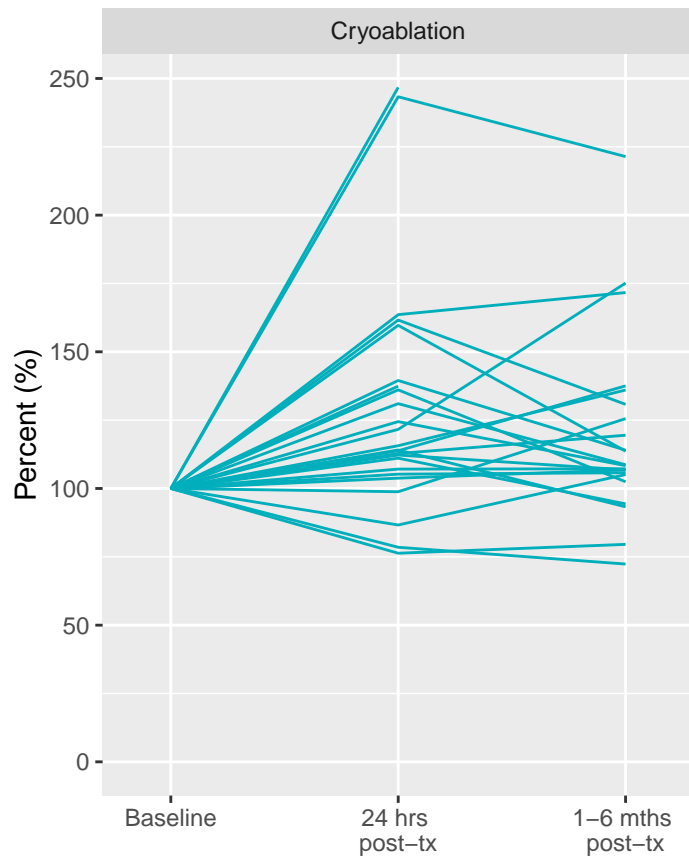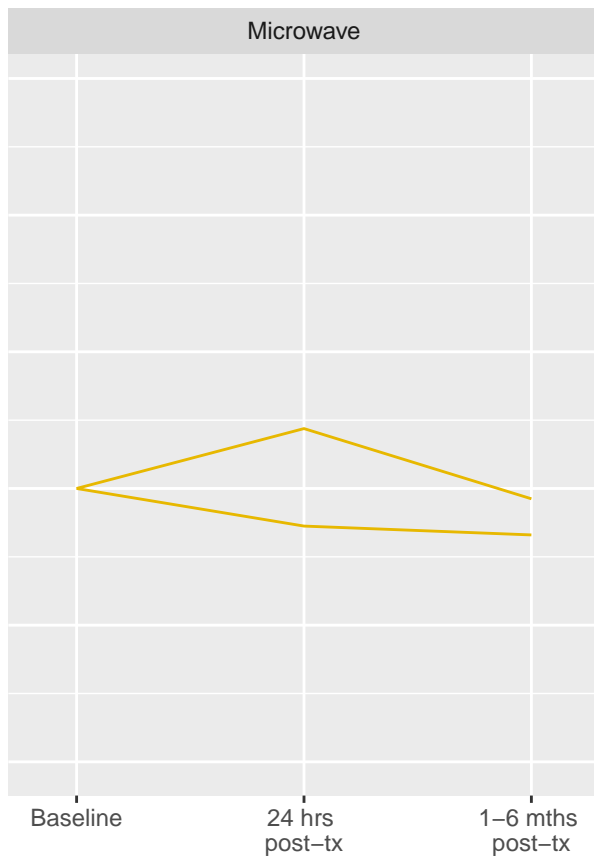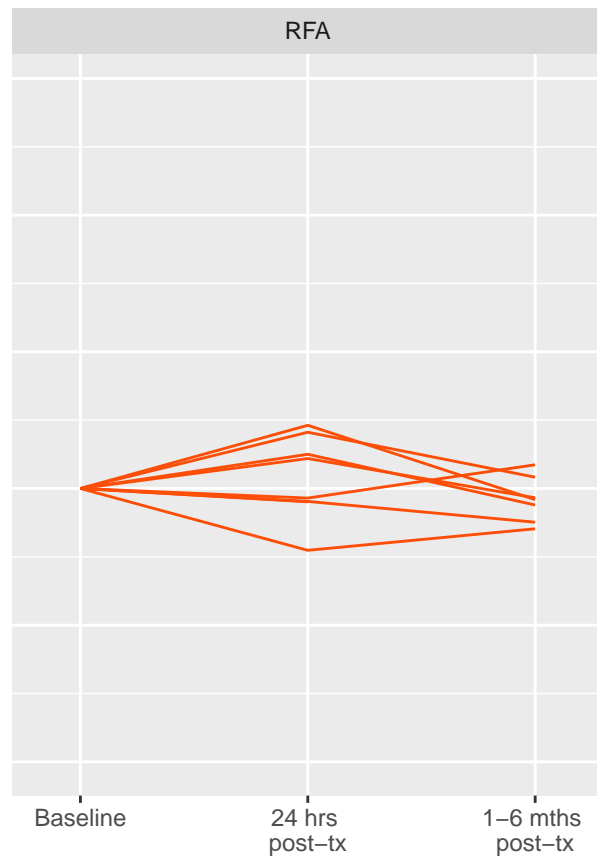



Uniprot ID: Q14512, analyte: FGF-BP1

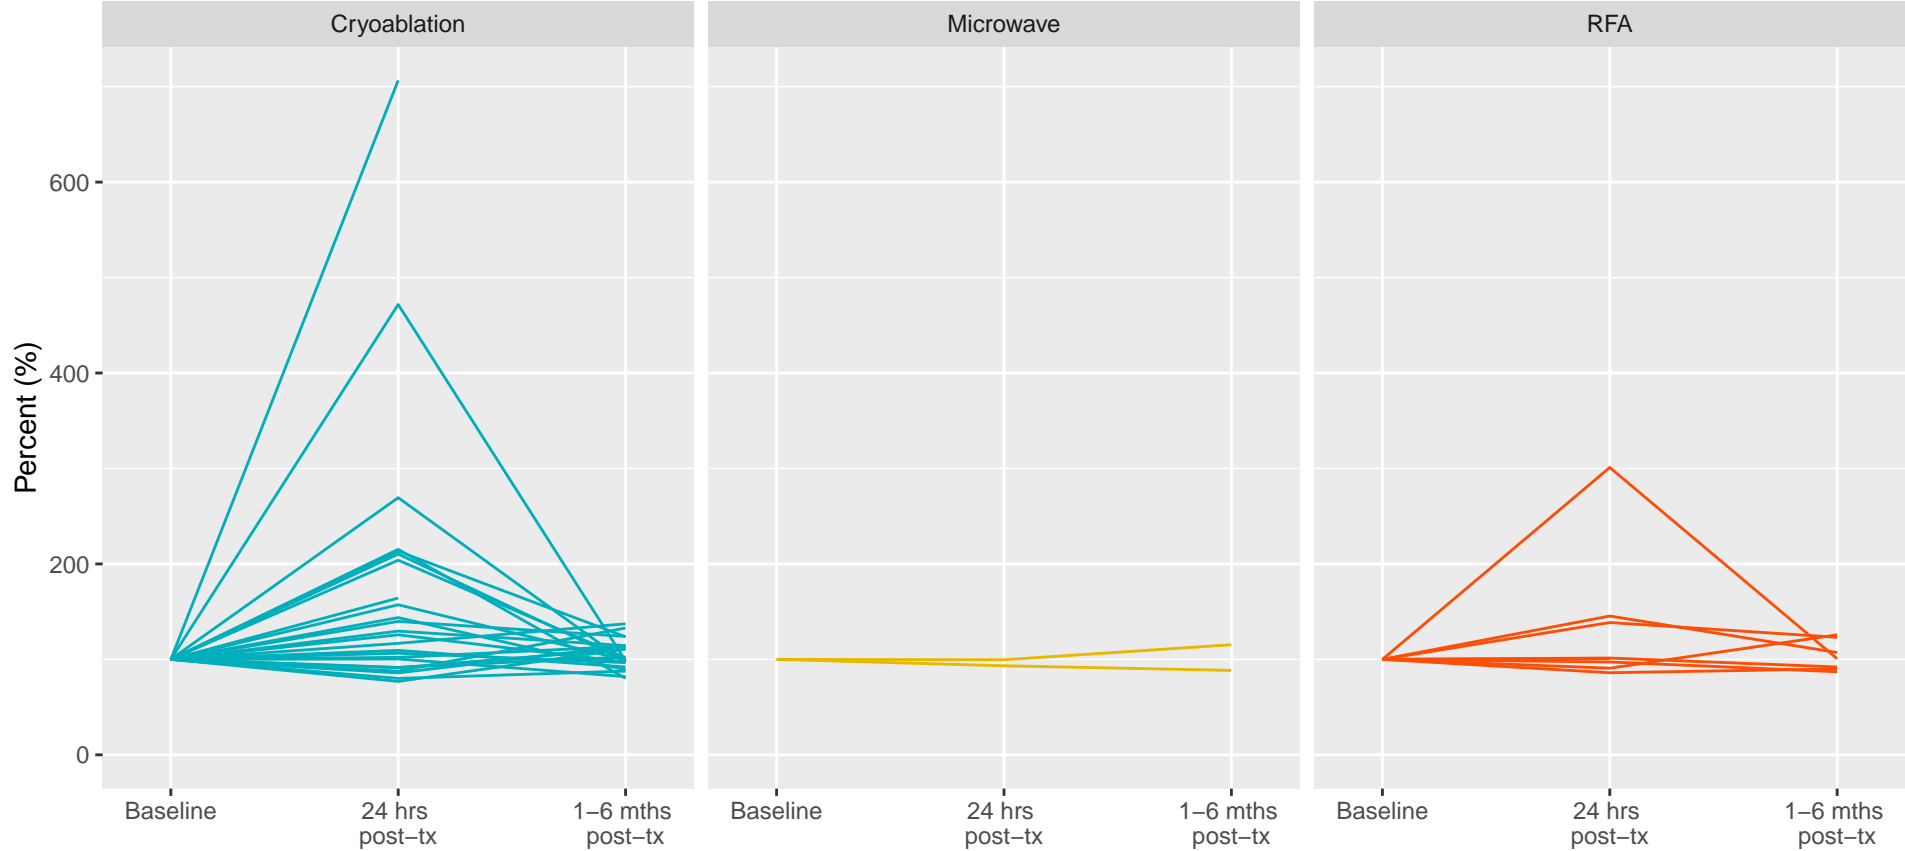

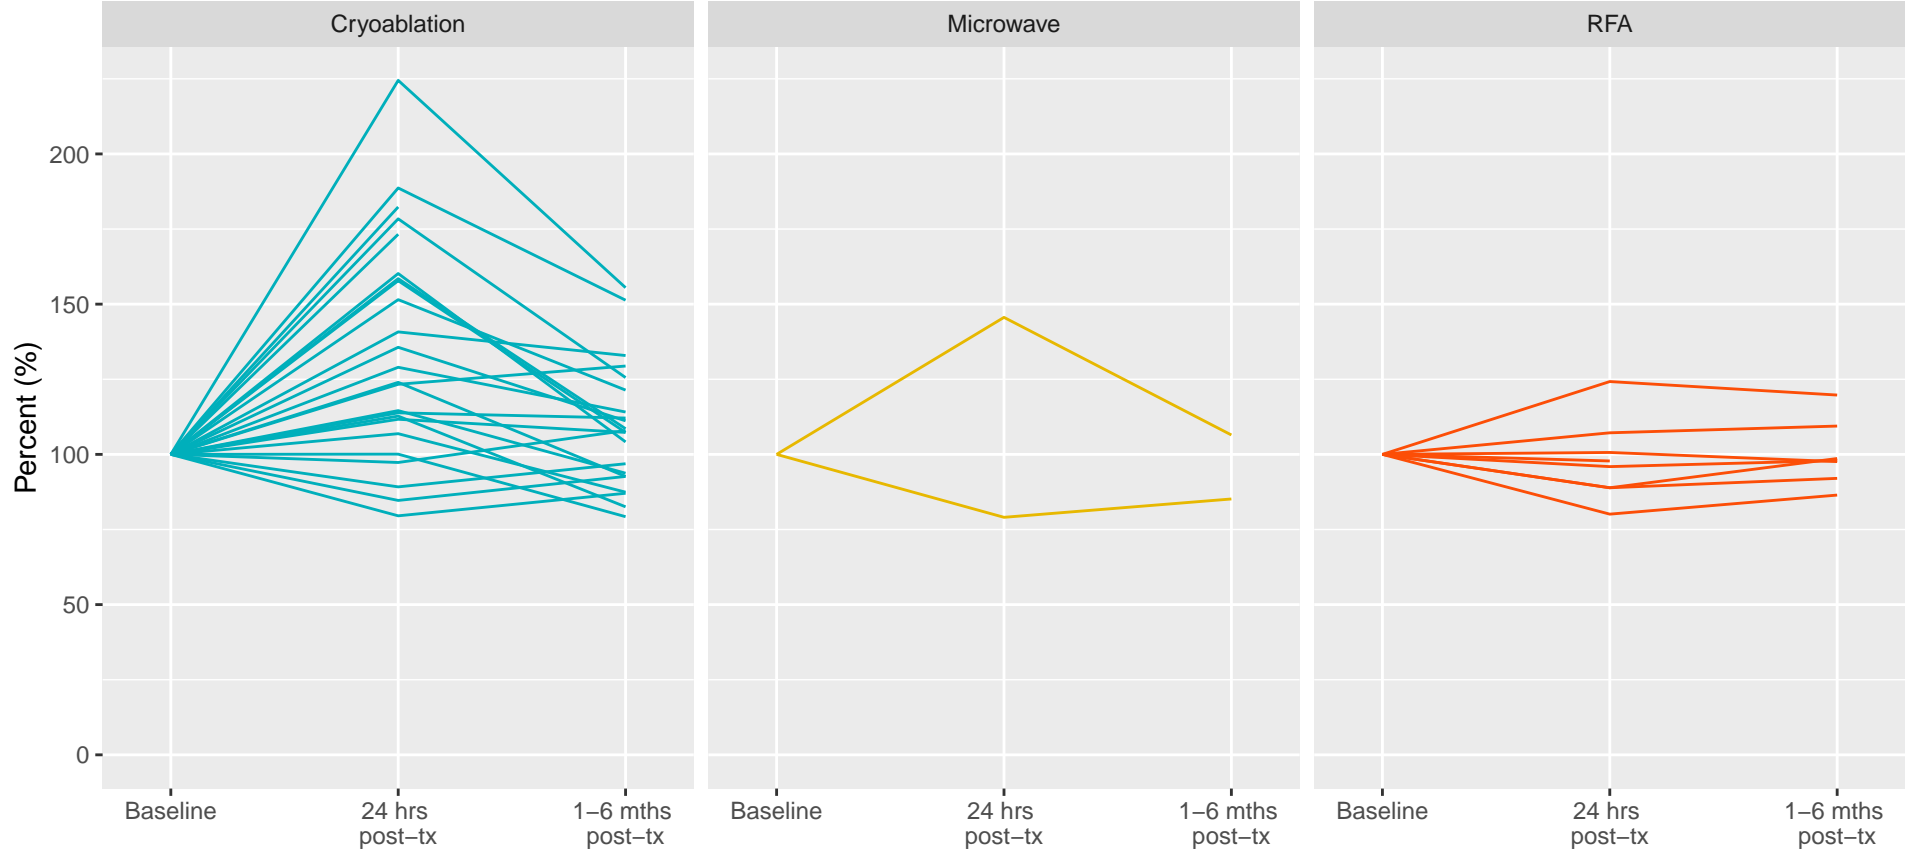

Uniprot ID: P15514, analyte: AREG

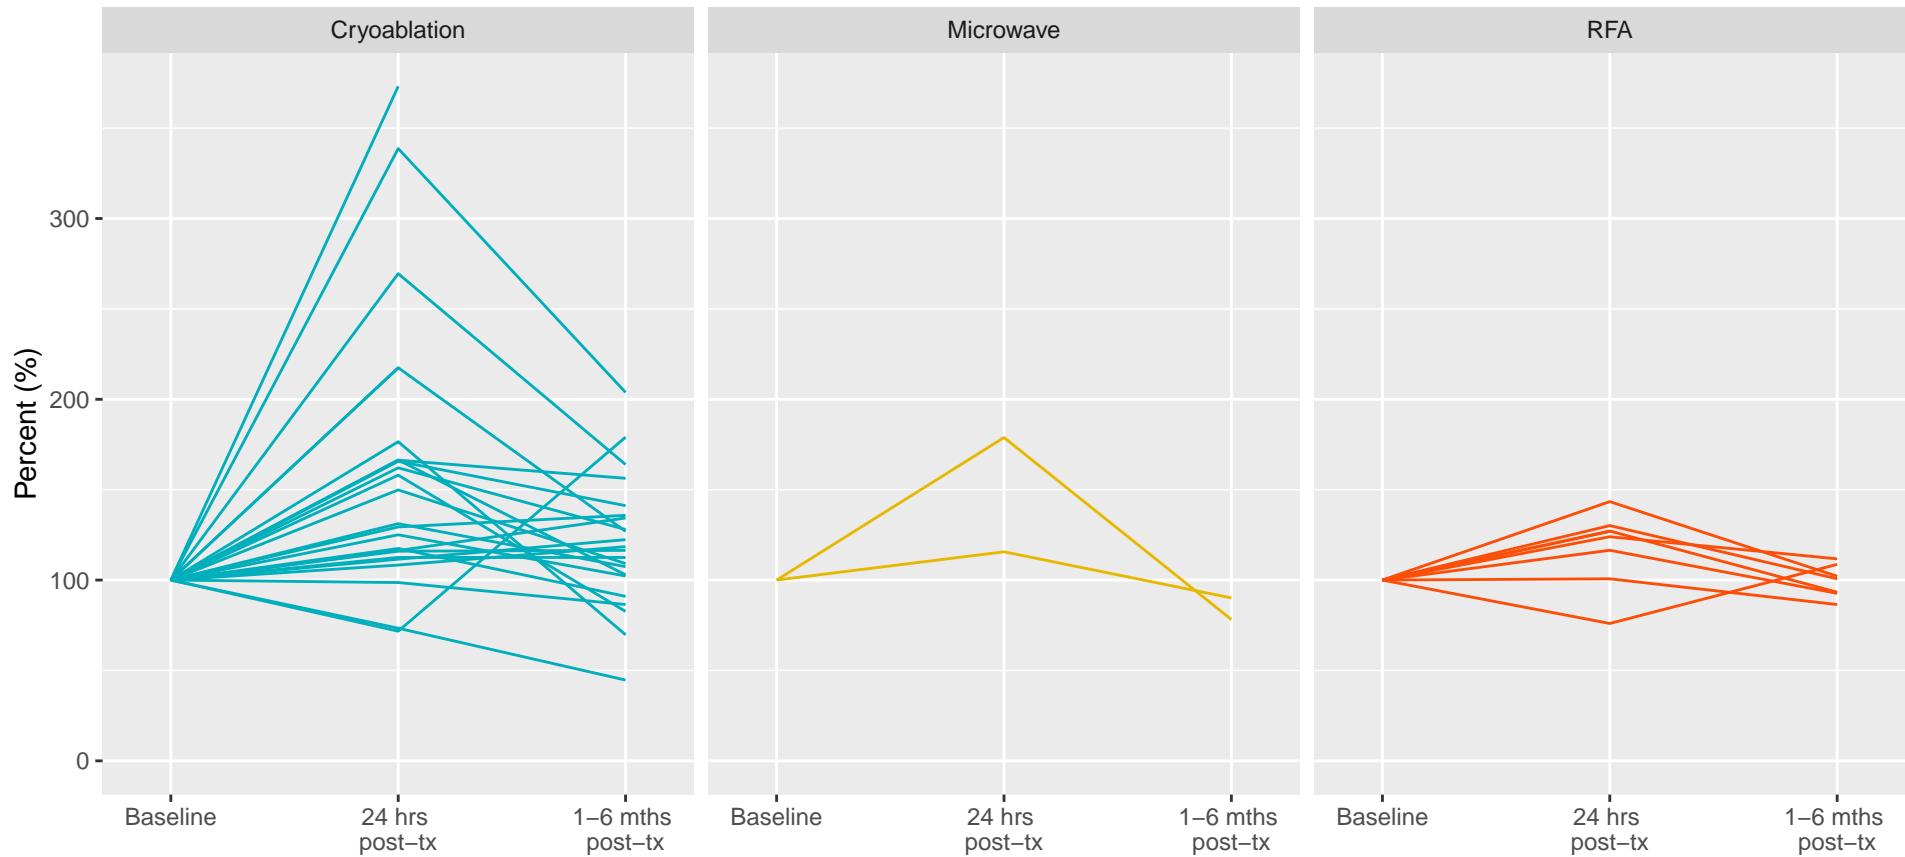

# Uniprot ID: Q9NQ30, analyte: ESM-1

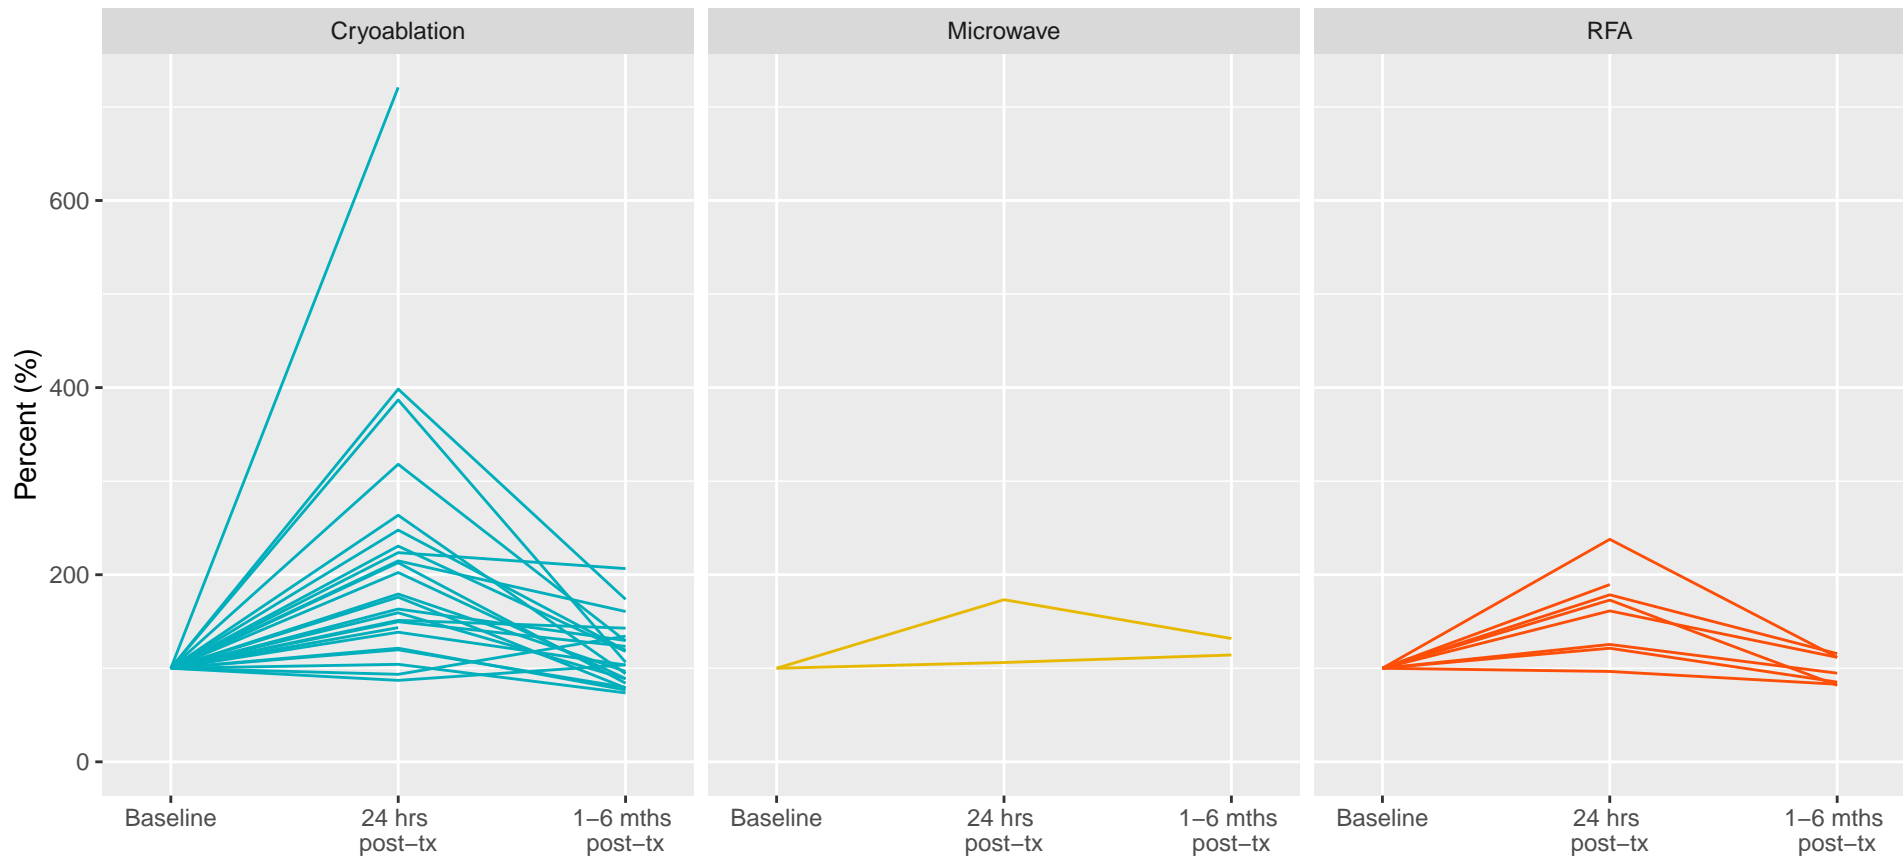

Uniprot ID: Q14508, analyte: WFDC2

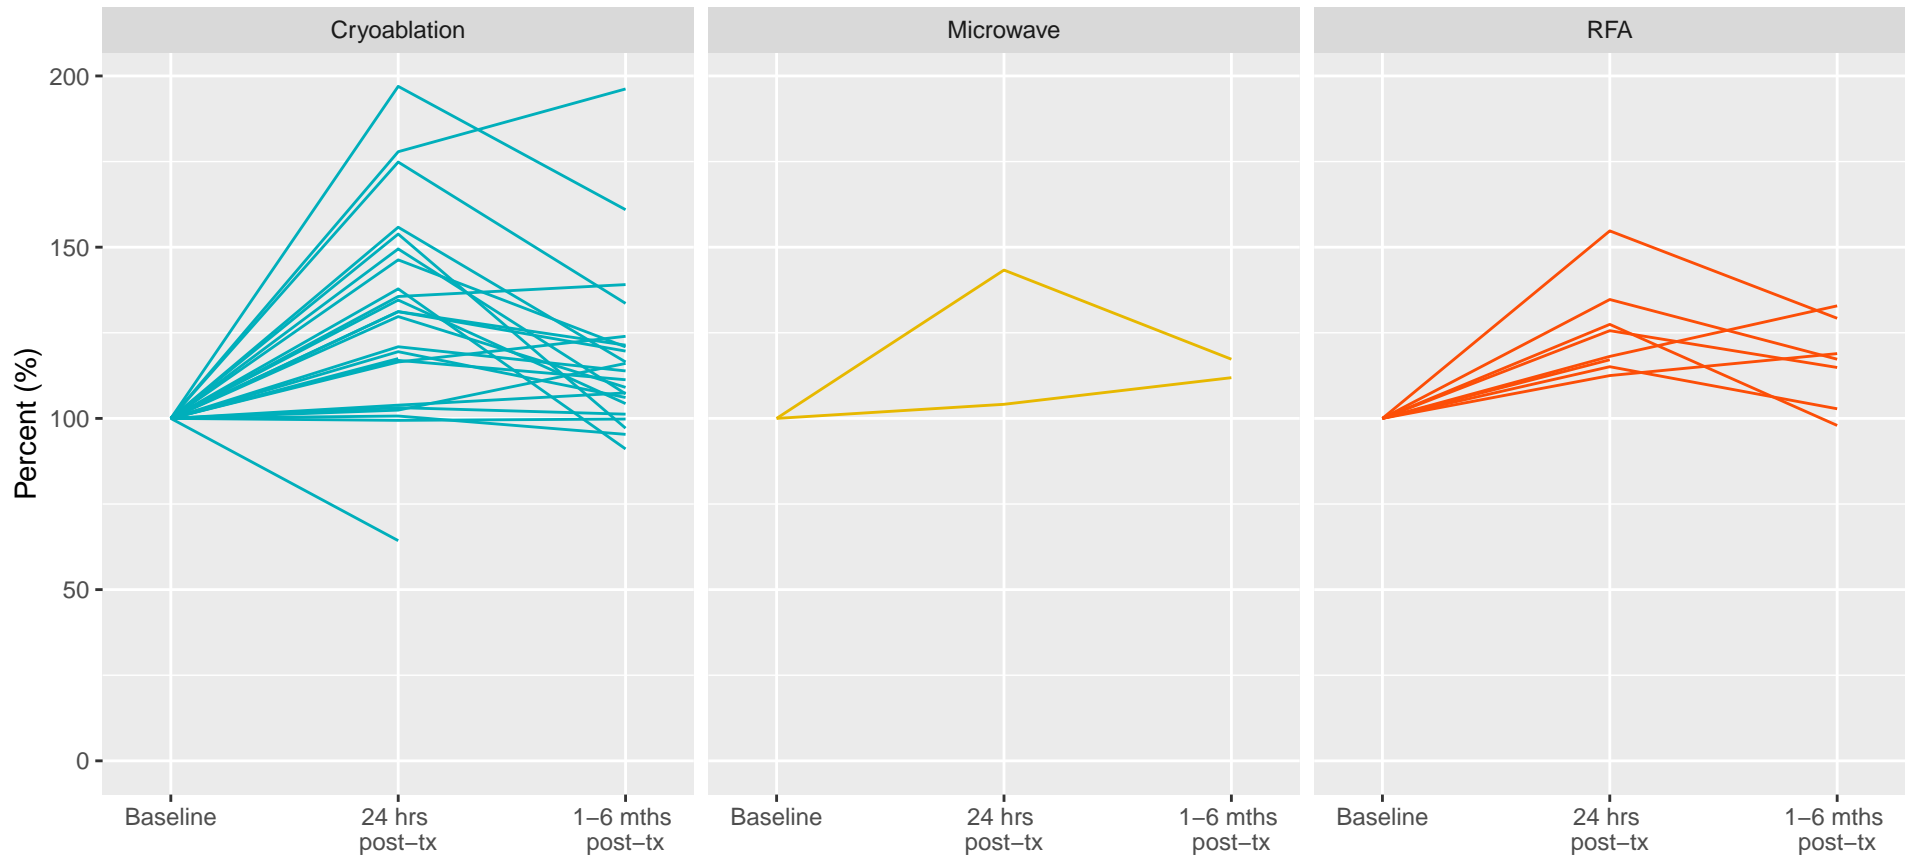

Uniprot ID: Q9BXY4, analyte: RSPO3

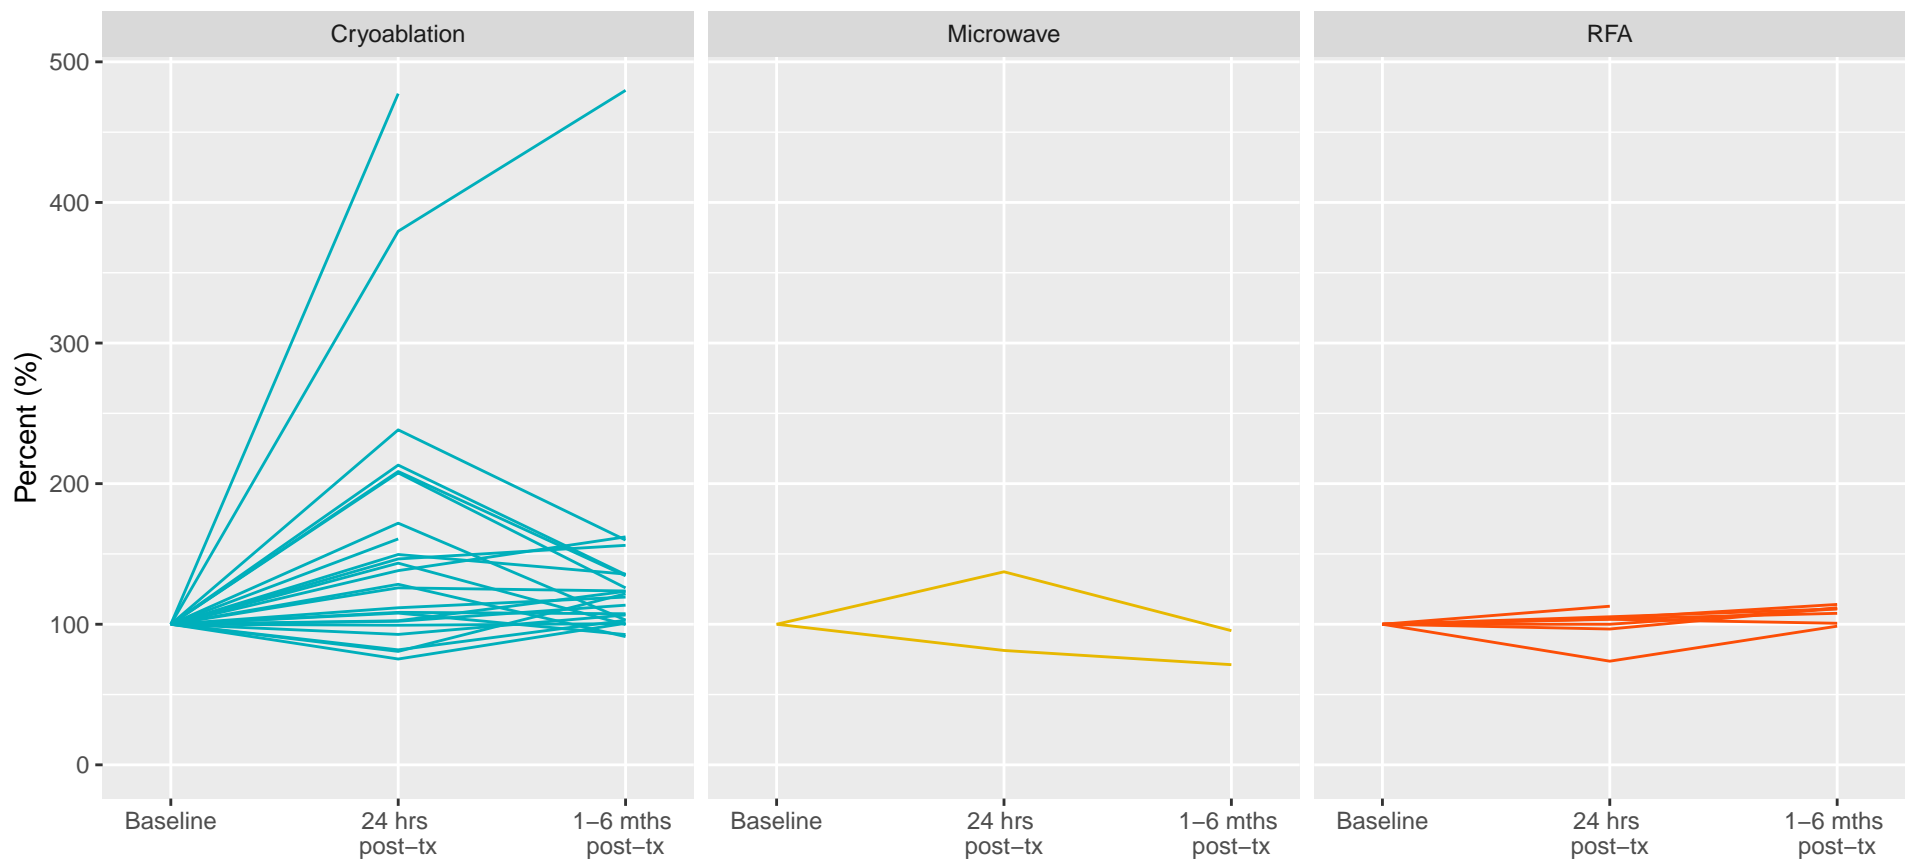

Supplement: s1 [file s1]
