# Supplementary material for: An Exploratory Analysis of Changes in Circulating Plasma Protein Profiles Following Image-Guided Ablation of Renal Tumours Provides Evidence for Effects on Multiple Biological Processes
Source: MDPI journal article supplement (doi:10.3390/cancers13236037), 2021-11-30

**Figure S11.** Longitudinal profiles of all plasma proteins on the Oncology II panel, prior to and post-ablation. Results for each protein are expressed as a % of the reference baseline (TP2; 100%) and are shown for patients receiving CRYO (n=25) with the three patients who developed acute complications post-CRYO highlighted.

# Uniprot ID: P40222, analyte: TXLNA

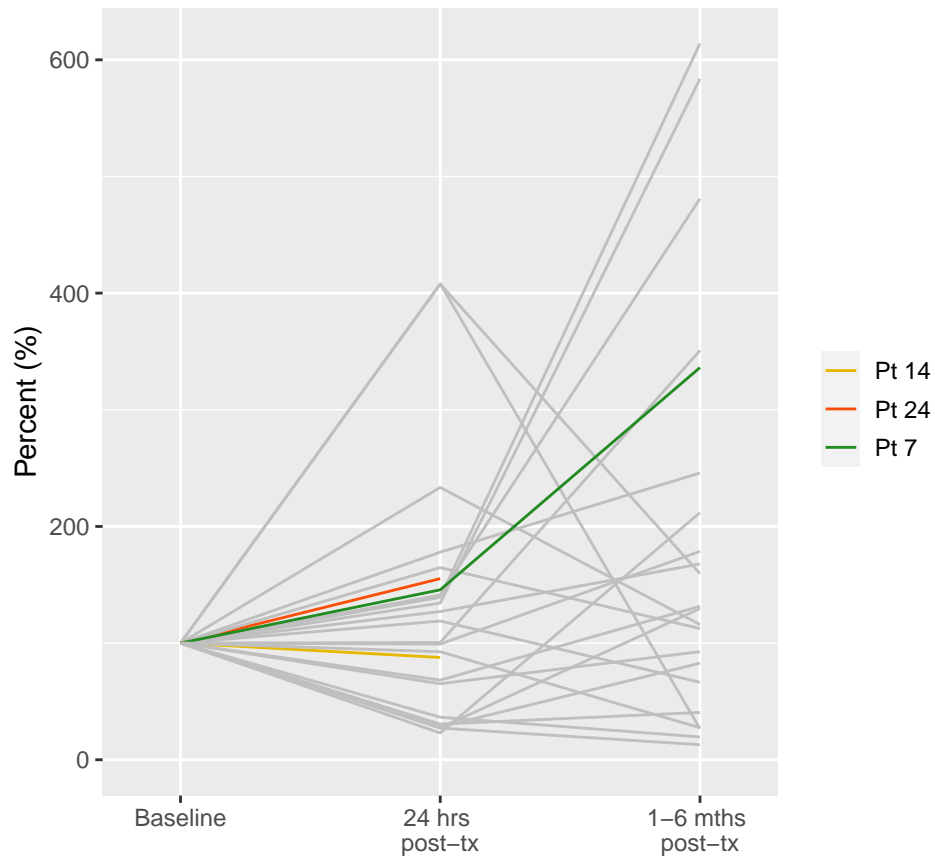

# Uniprot ID: P15692, analyte: VEGFA

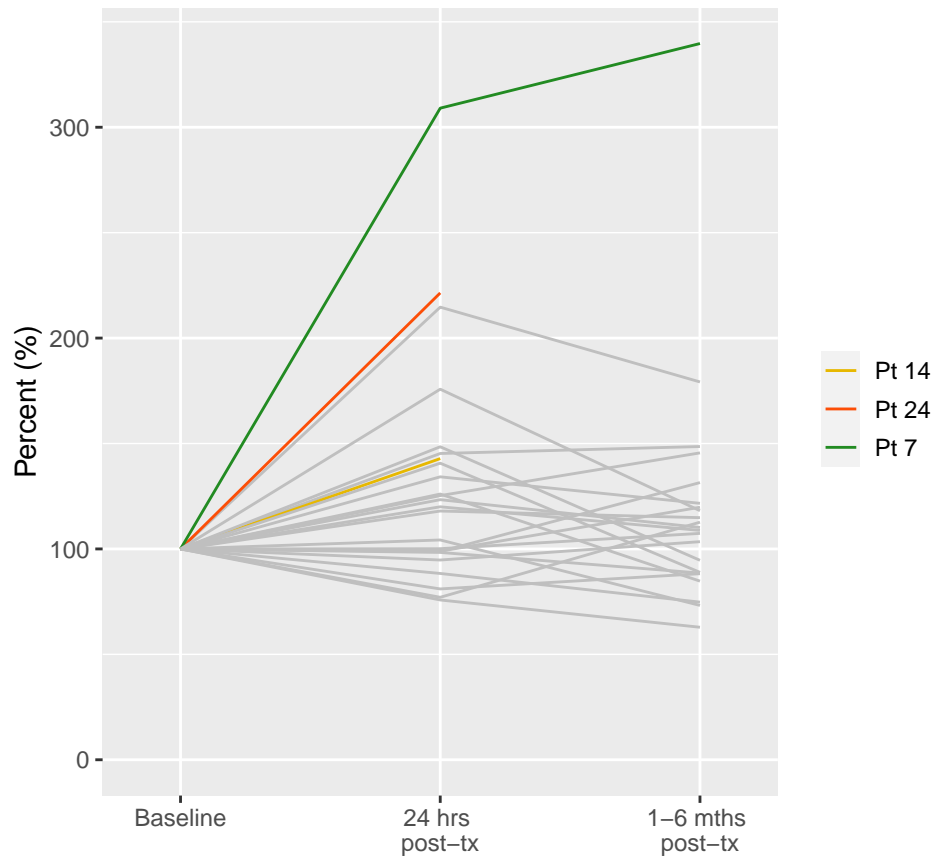

# Uniprot ID: P16870, analyte: CPE

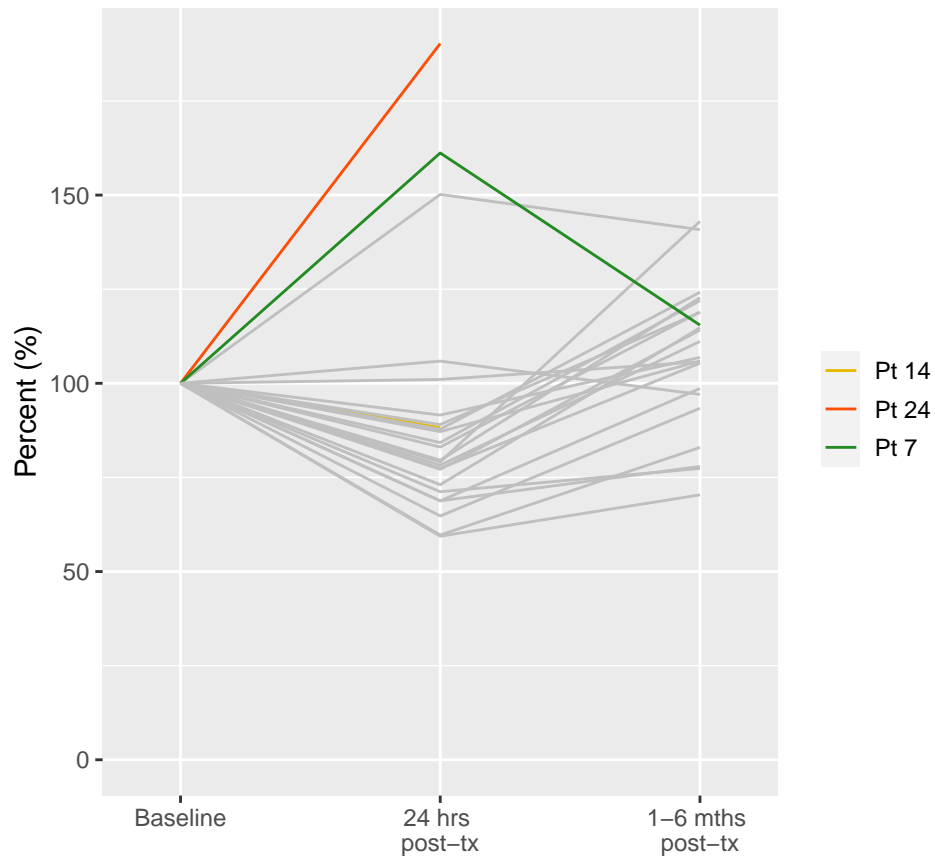

# Uniprot ID: Q9UKR3, analyte: KLK13

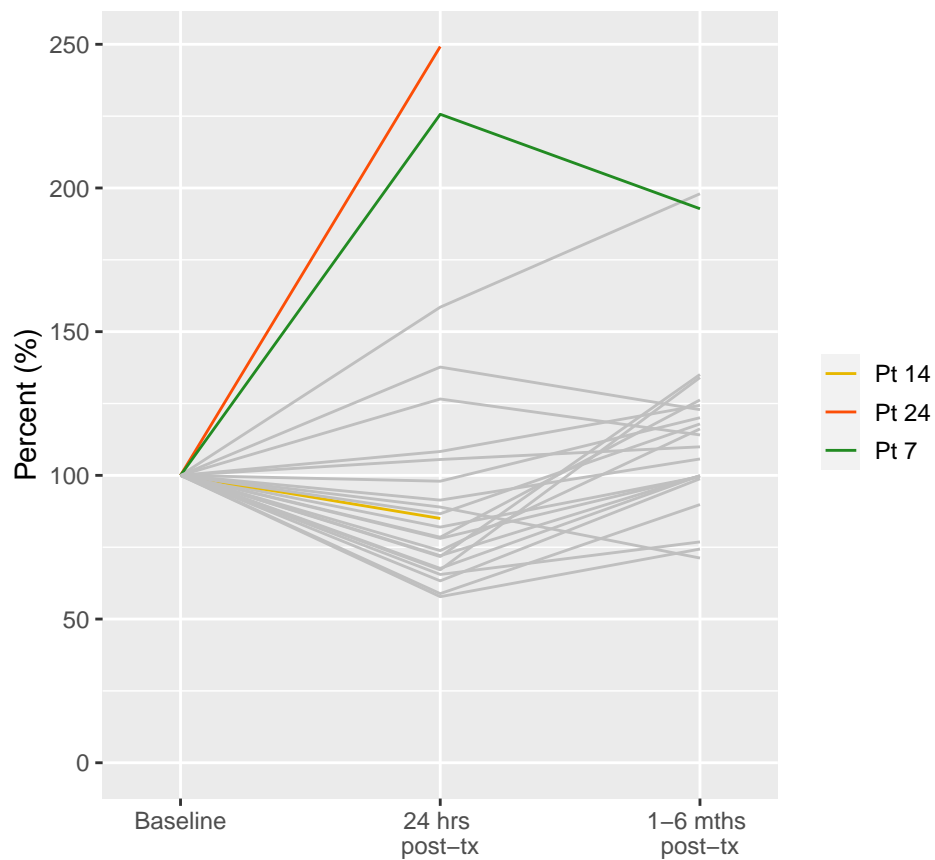

# Uniprot ID: P13688, analyte: CEACAM1

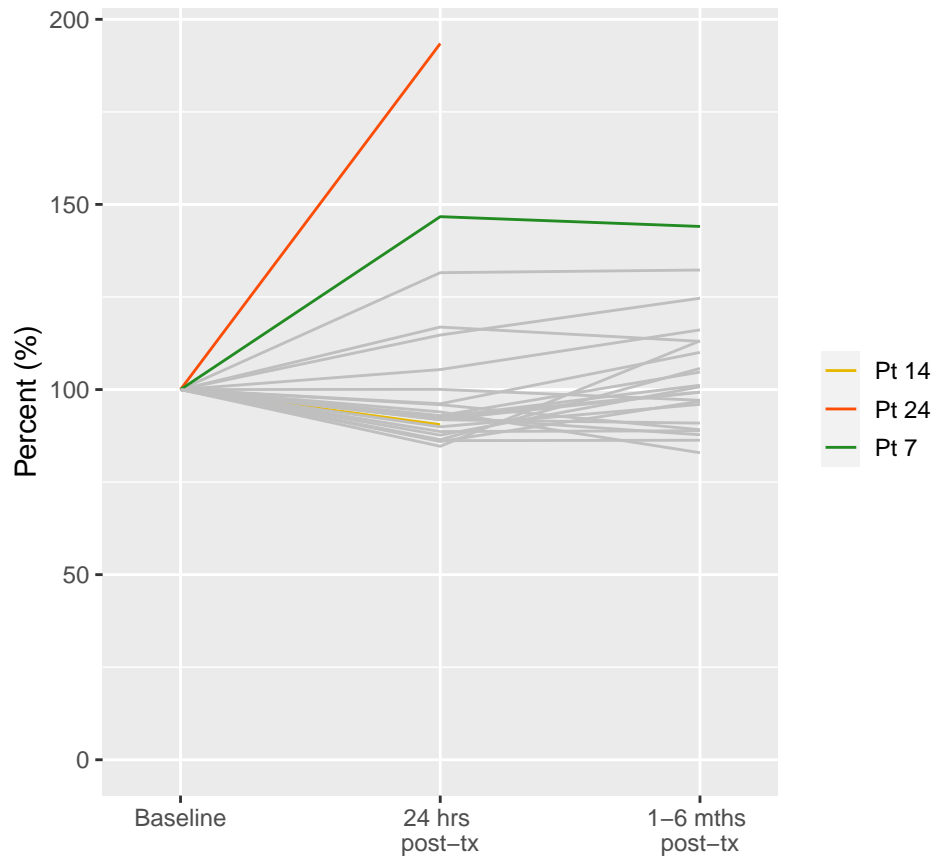

# Uniprot ID: Q13421, analyte: MSLN

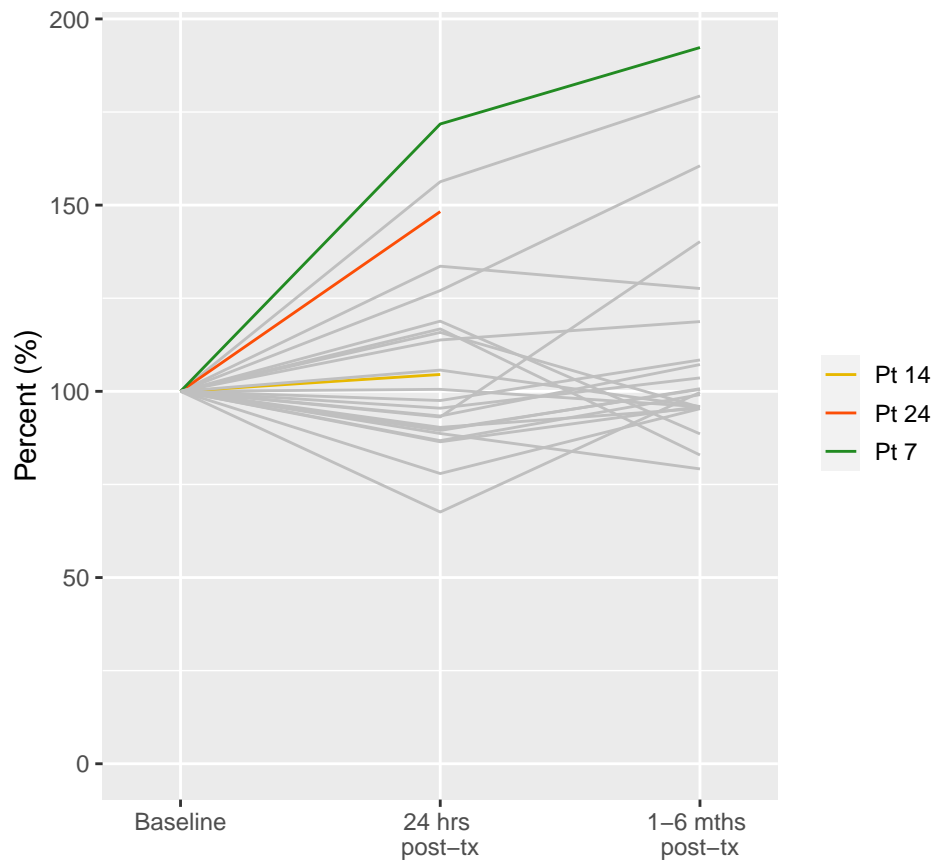

# Uniprot ID: O75888, analyte: TNFSF13

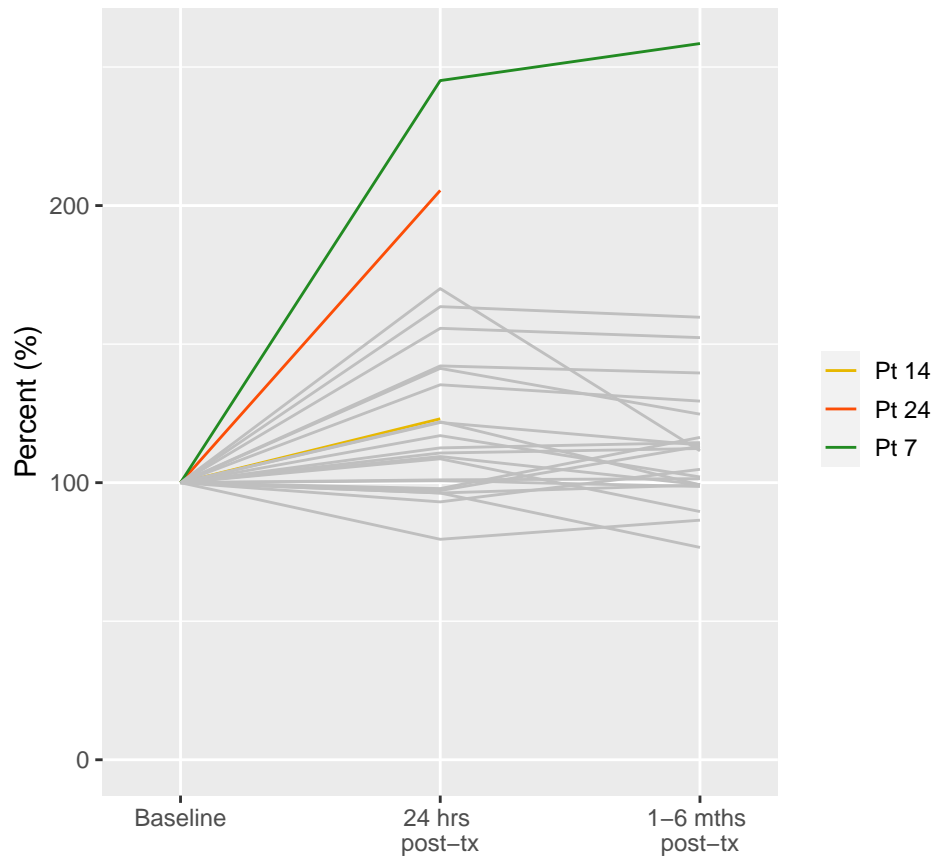



# Uniprot ID: P01133, analyte: EGF

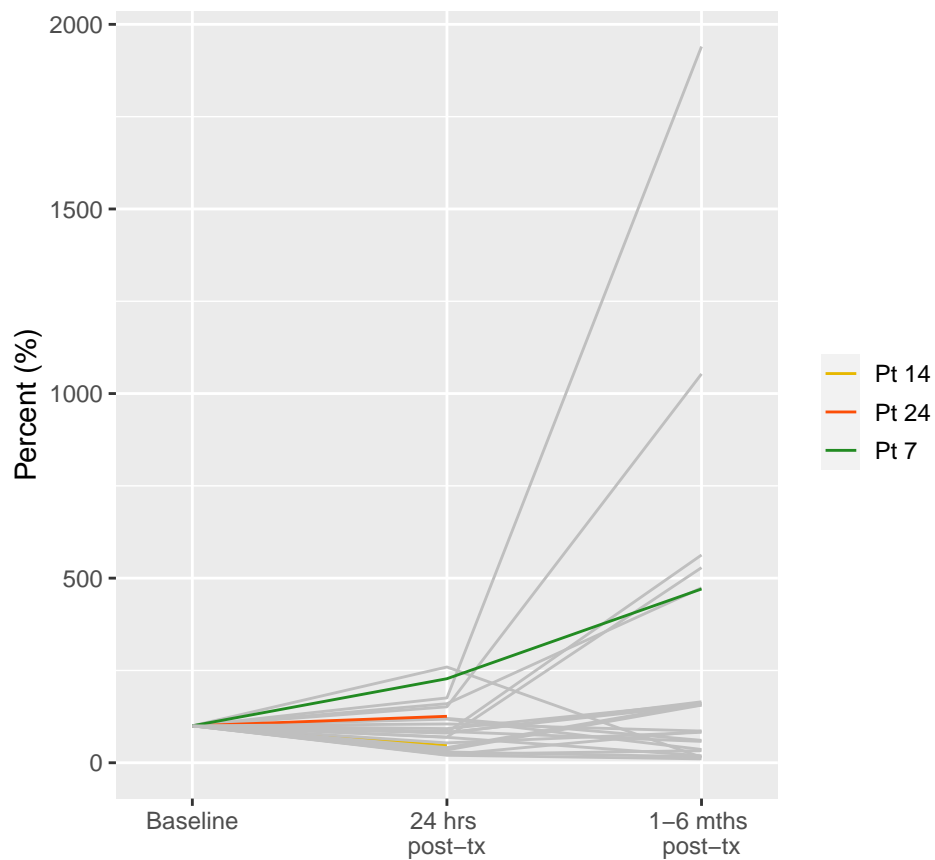

# Uniprot ID: O95407, analyte: TNFRSF6B

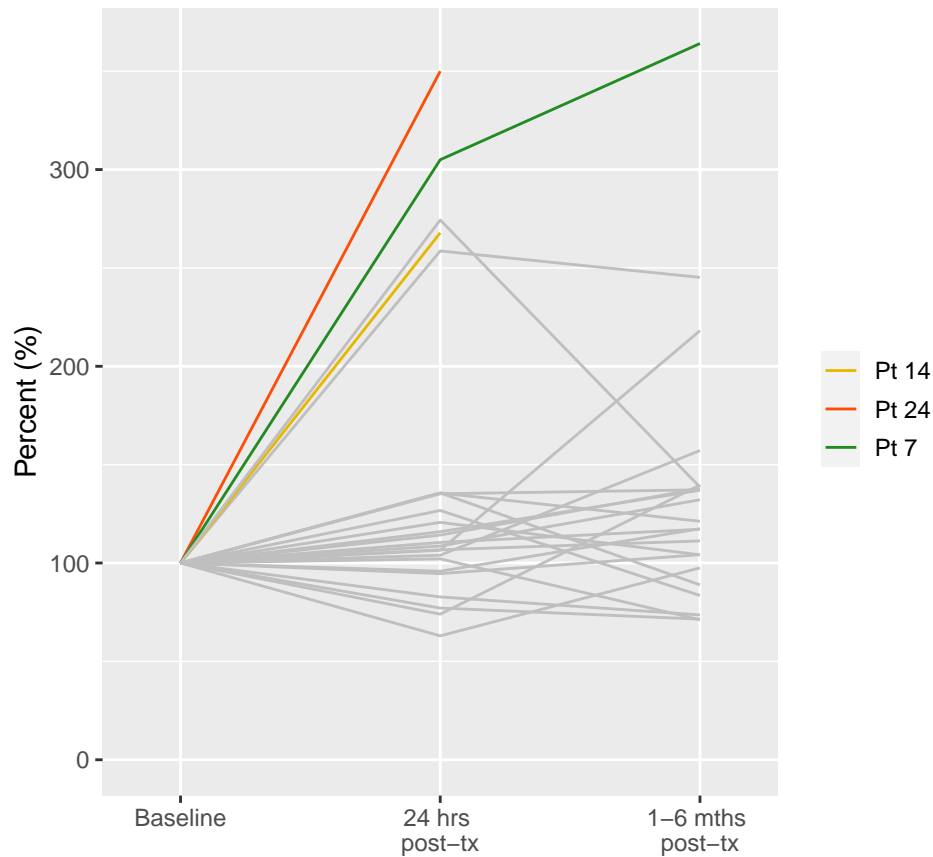

# Uniprot ID: P18827, analyte: SYND1

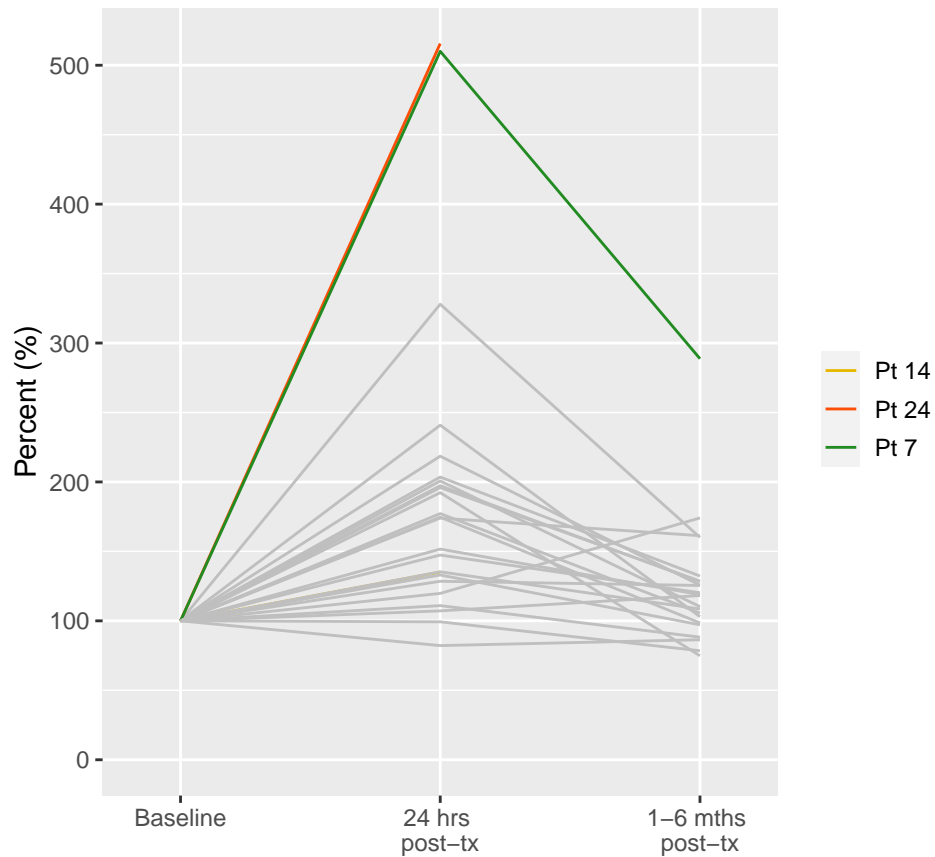

# Uniprot ID: P37173, analyte: TGFR-2

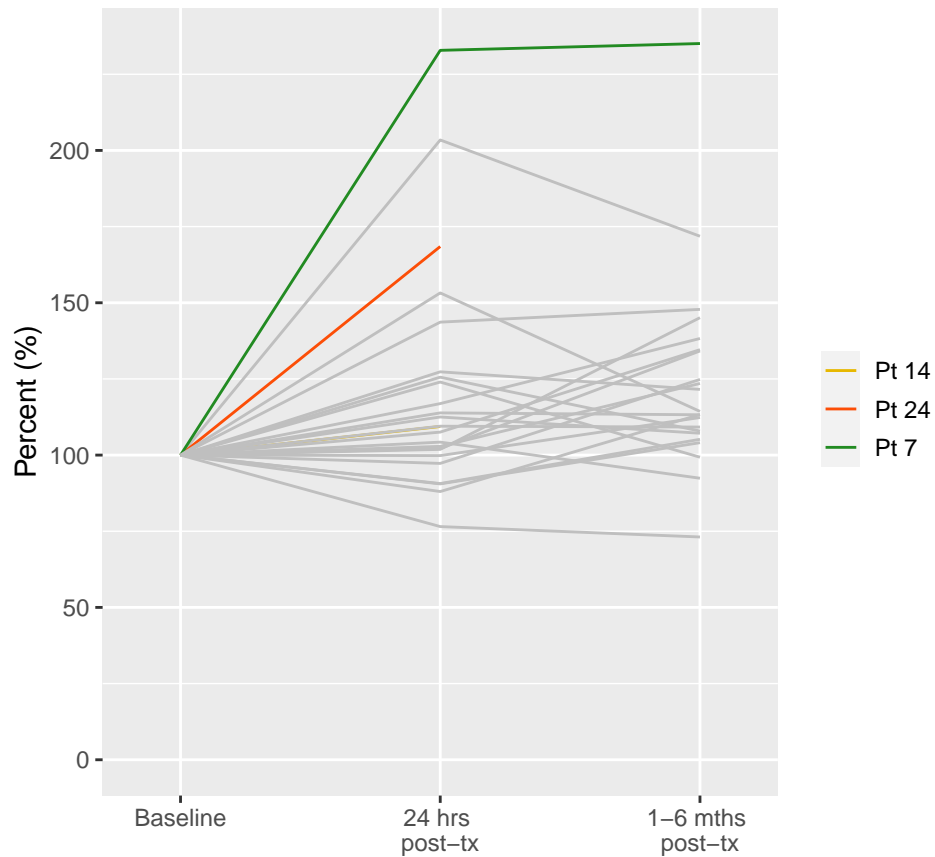

# Uniprot ID: P05231, analyte: IL6

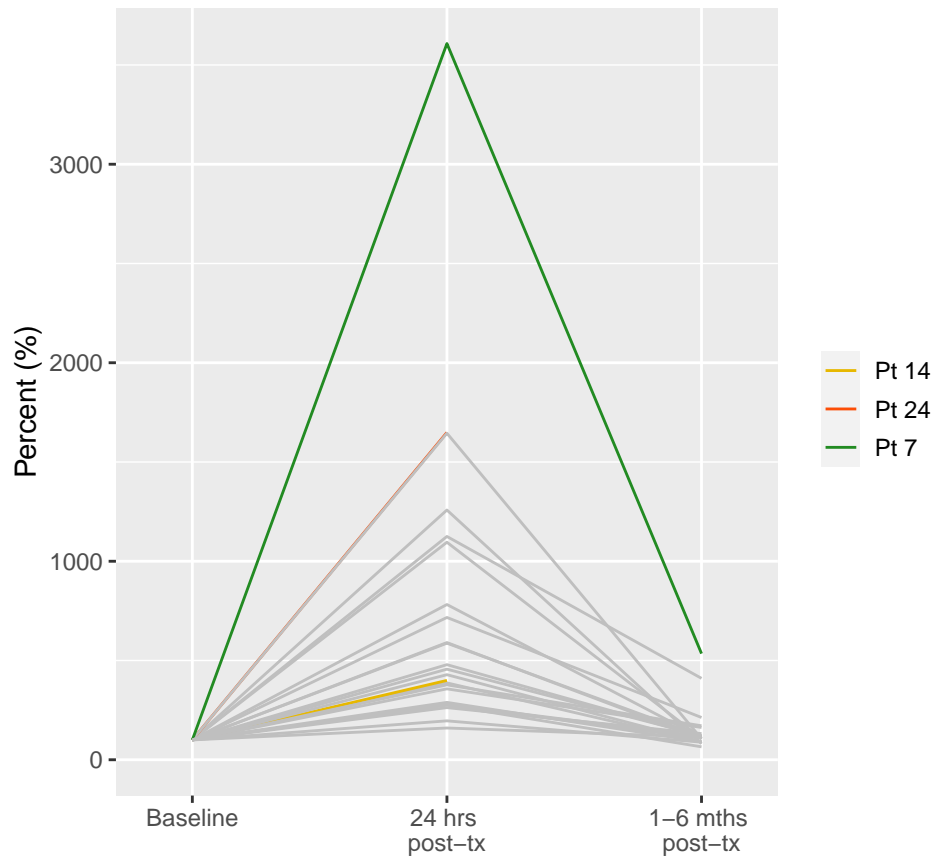

# Uniprot ID: P09326, analyte: CD48

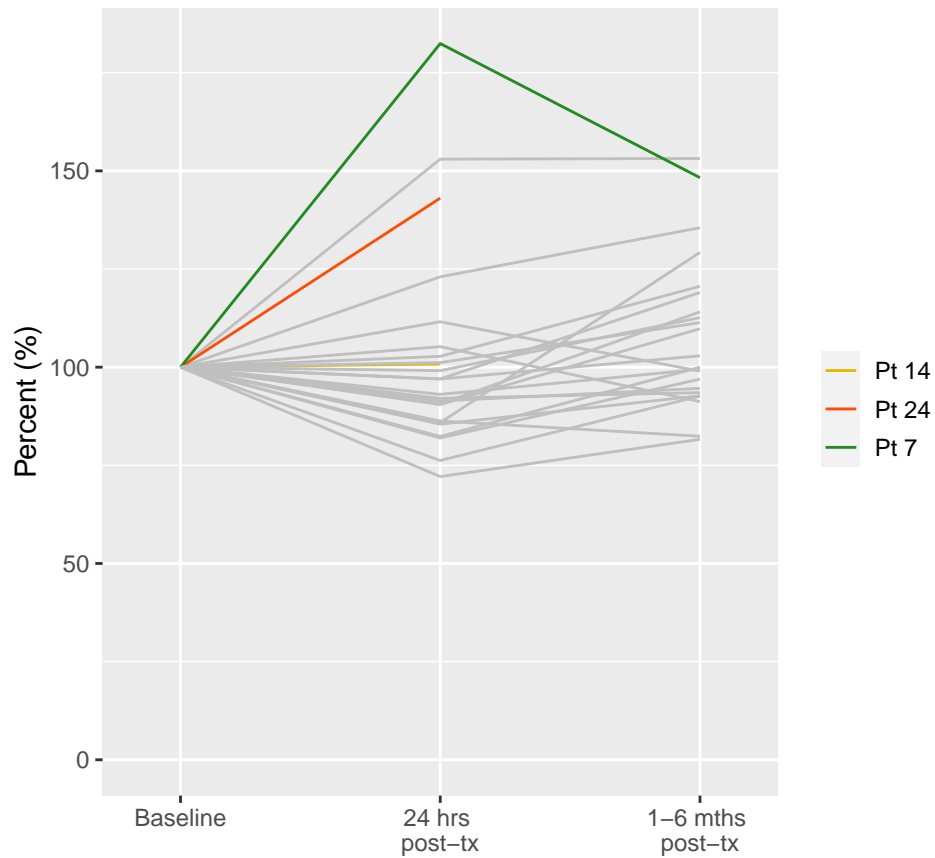

# Uniprot ID: O14828, analyte: SCAMP3

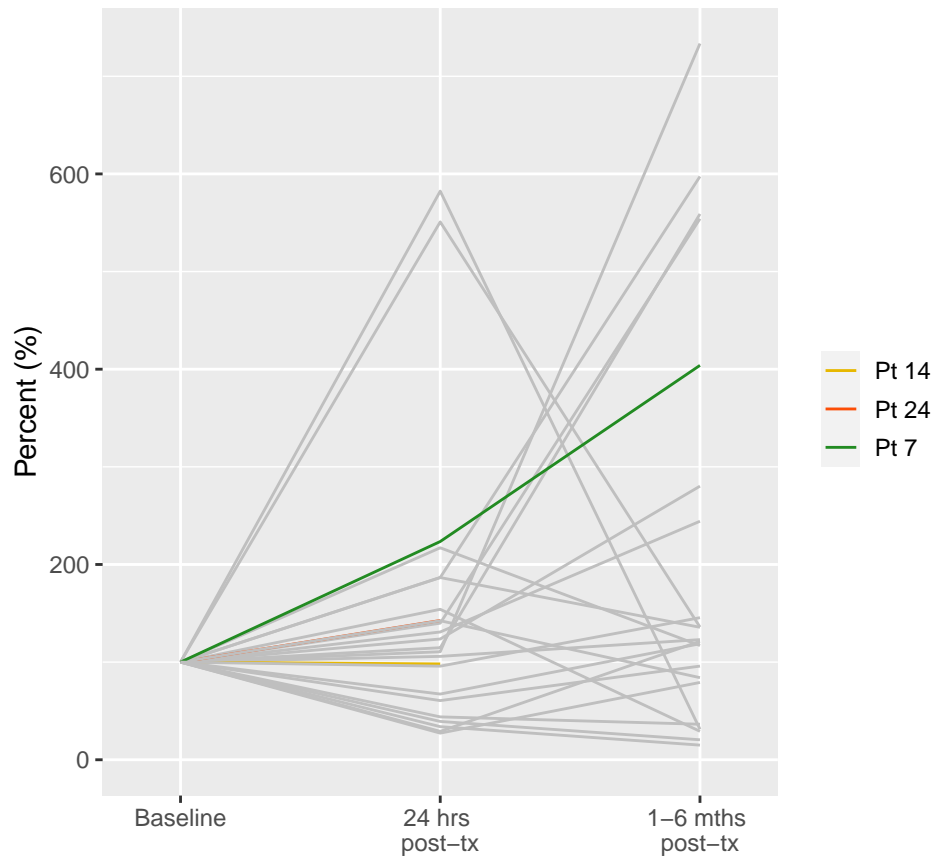

# Uniprot ID: Q9HBG7, analyte: LY9

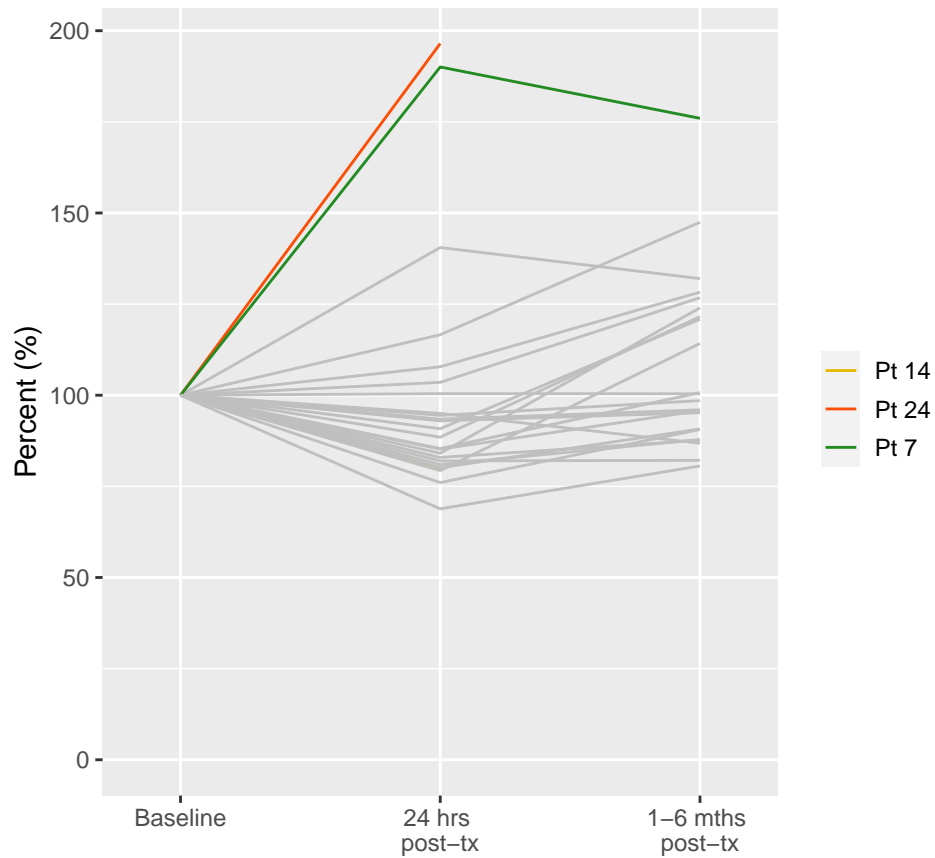



# Uniprot ID: P15260, analyte: IFN-gamma-R1

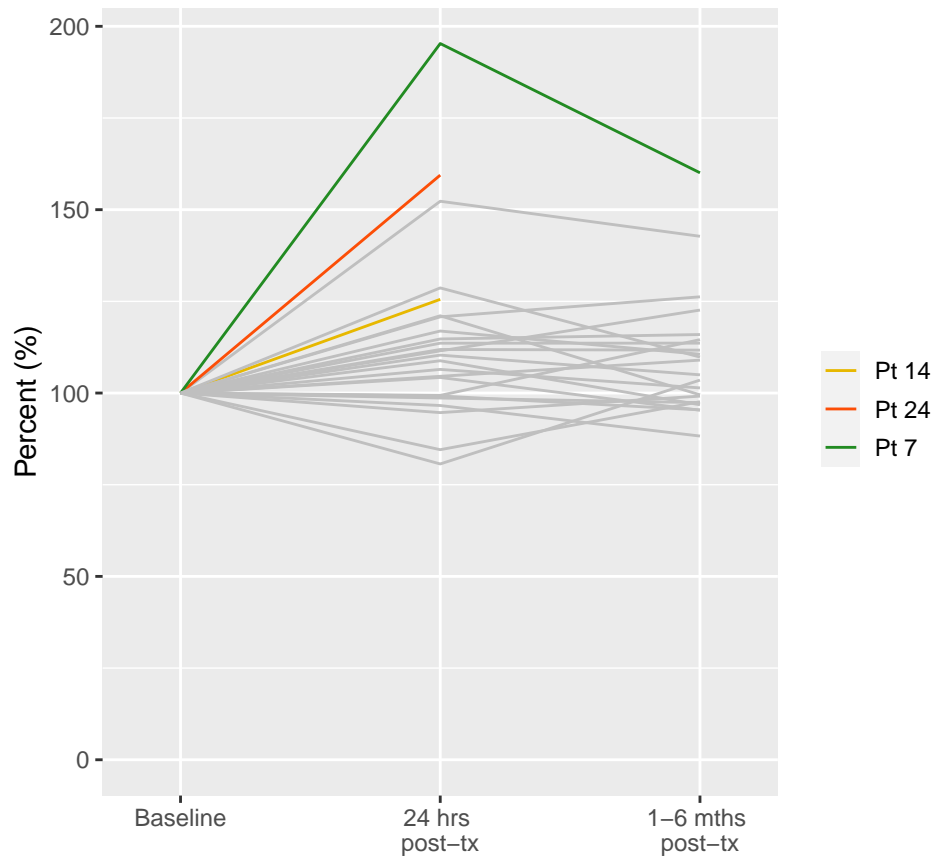

# Uniprot ID: P06756, analyte: ITGAV

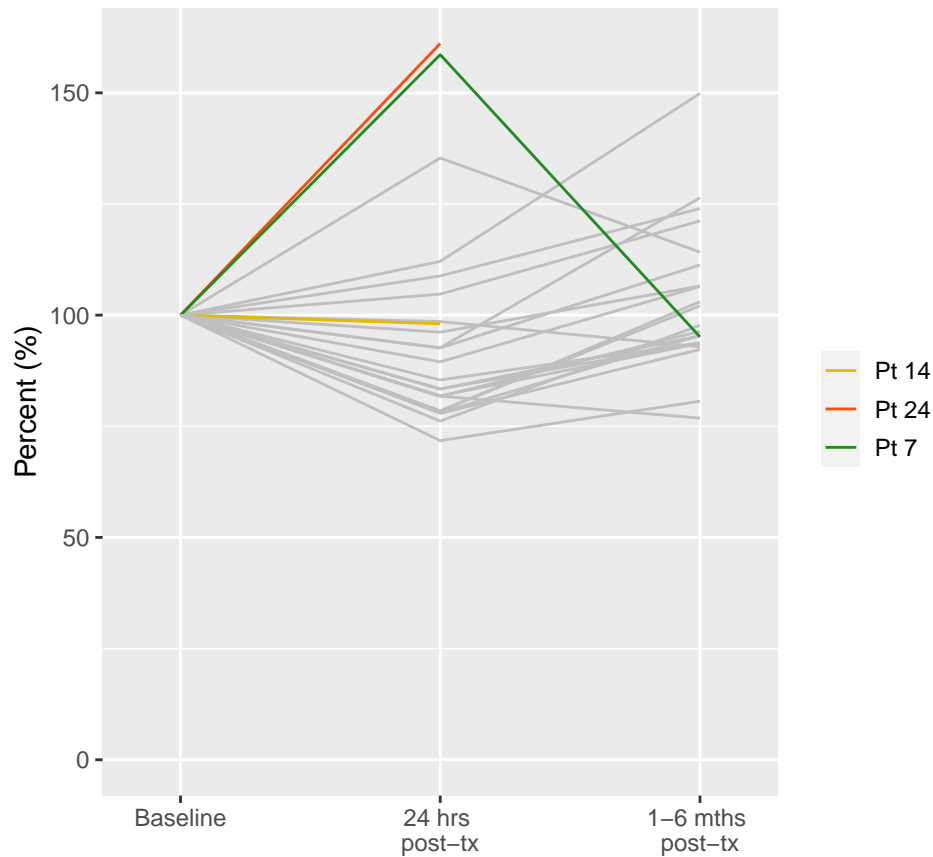

# Uniprot ID: P50591, analyte: TRAIL

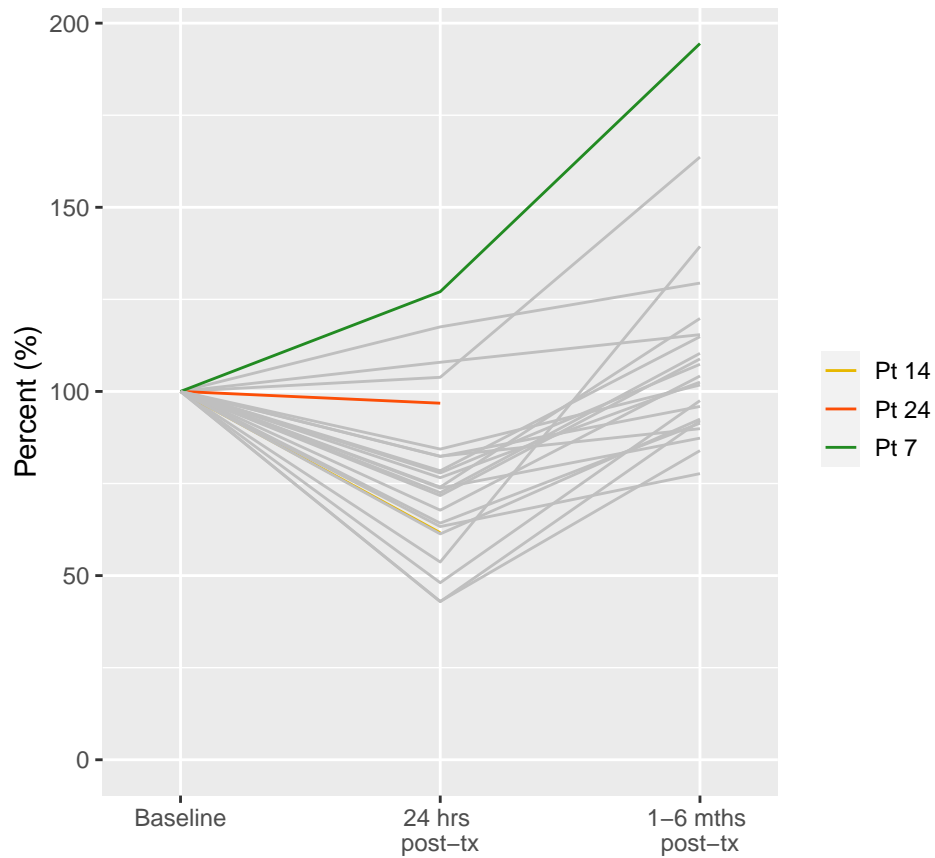

# Uniprot ID: Q9UBX7, analyte: hK11

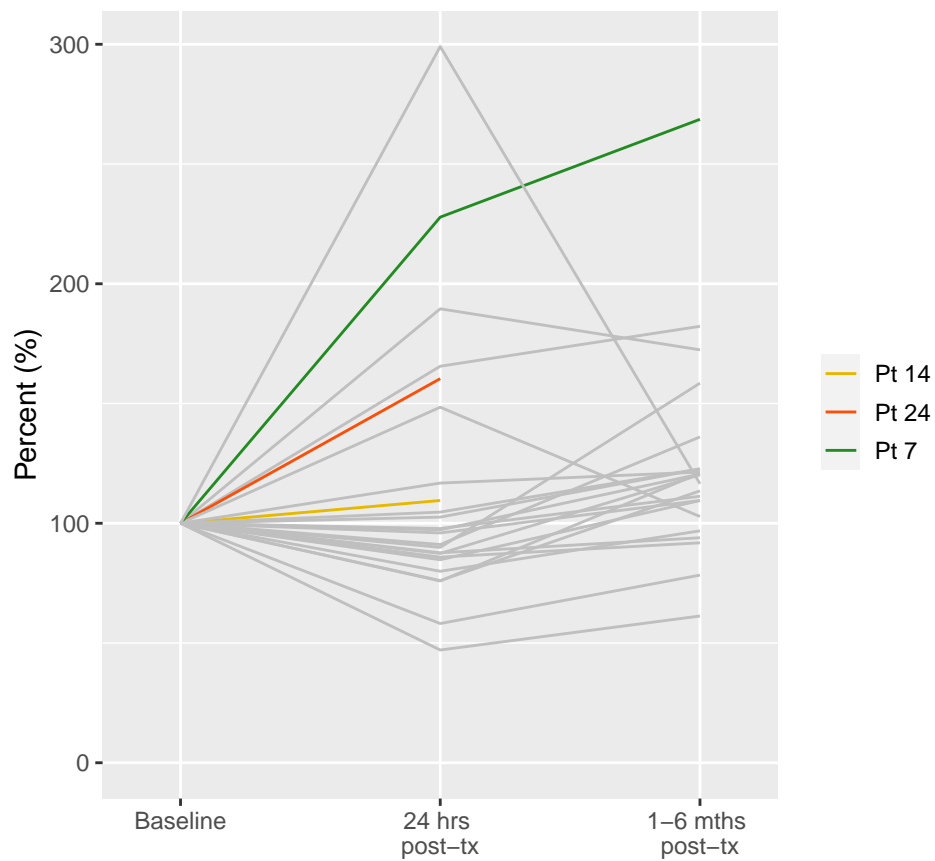

# Uniprot ID: P35052, analyte: GPC1

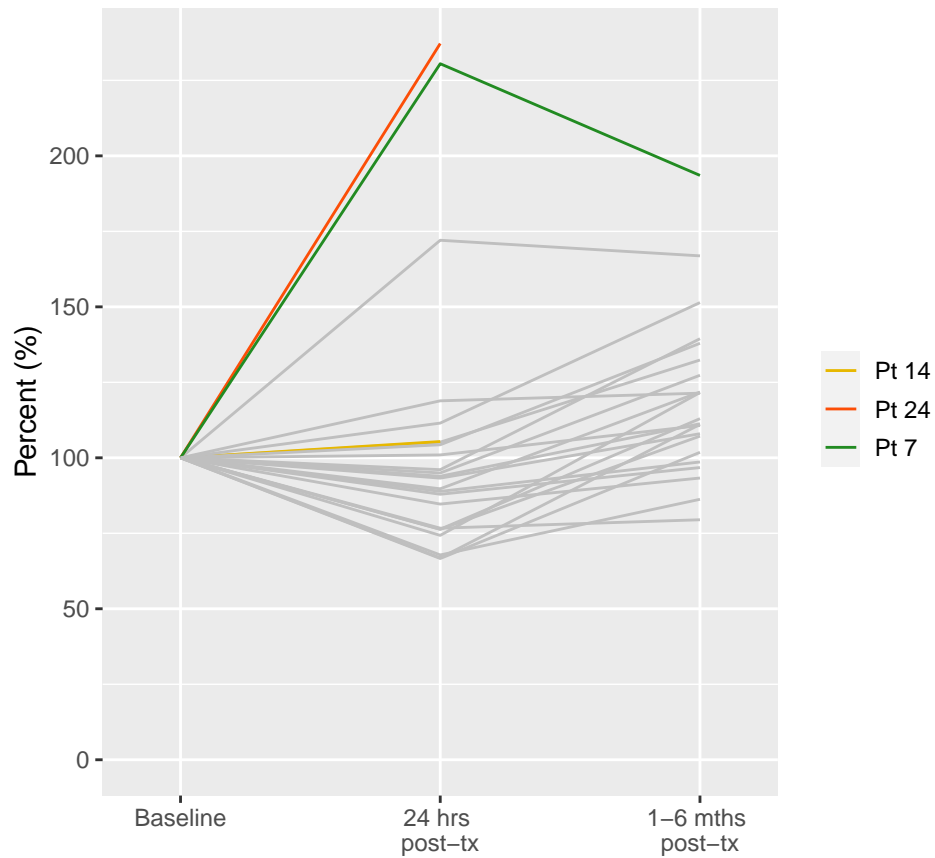

# Uniprot ID: P48307, analyte: TFPI-2

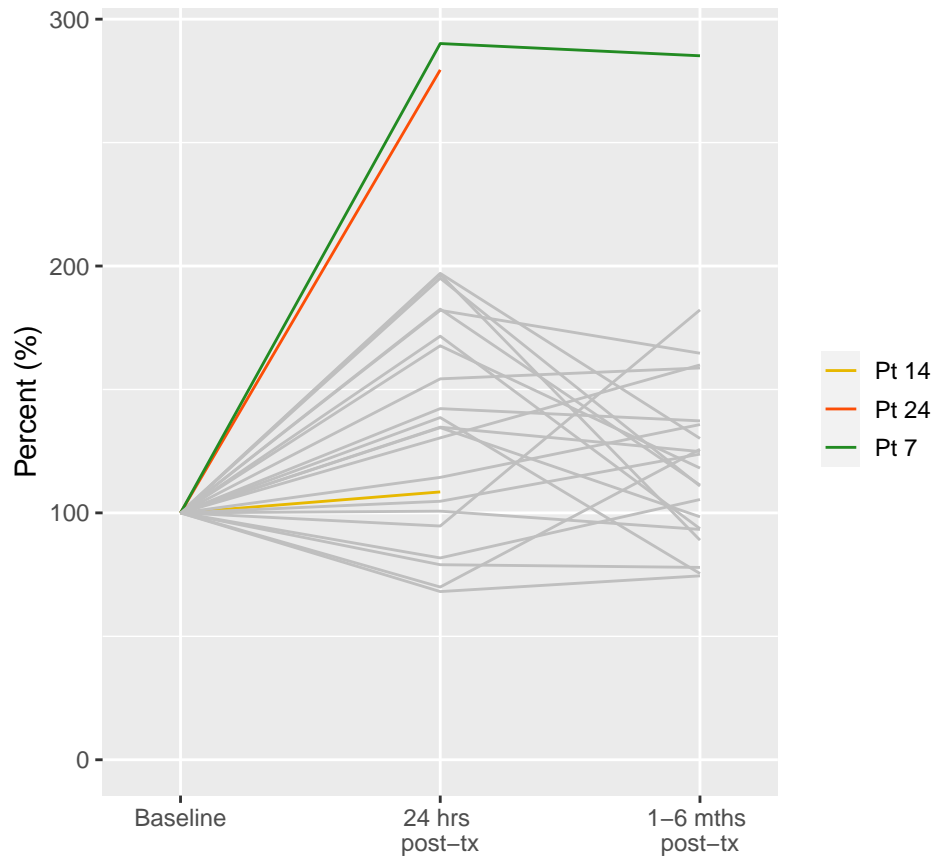

# Uniprot ID: O60259, analyte: hK8

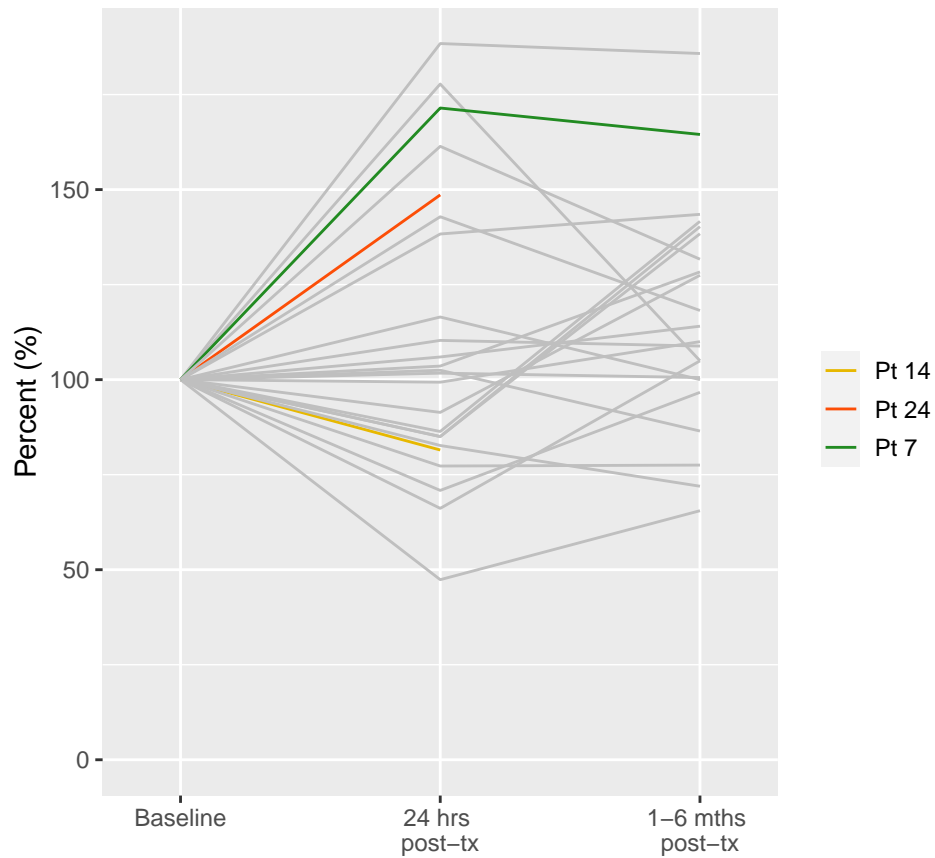

# Uniprot ID: P35968, analyte: VEGFR-2

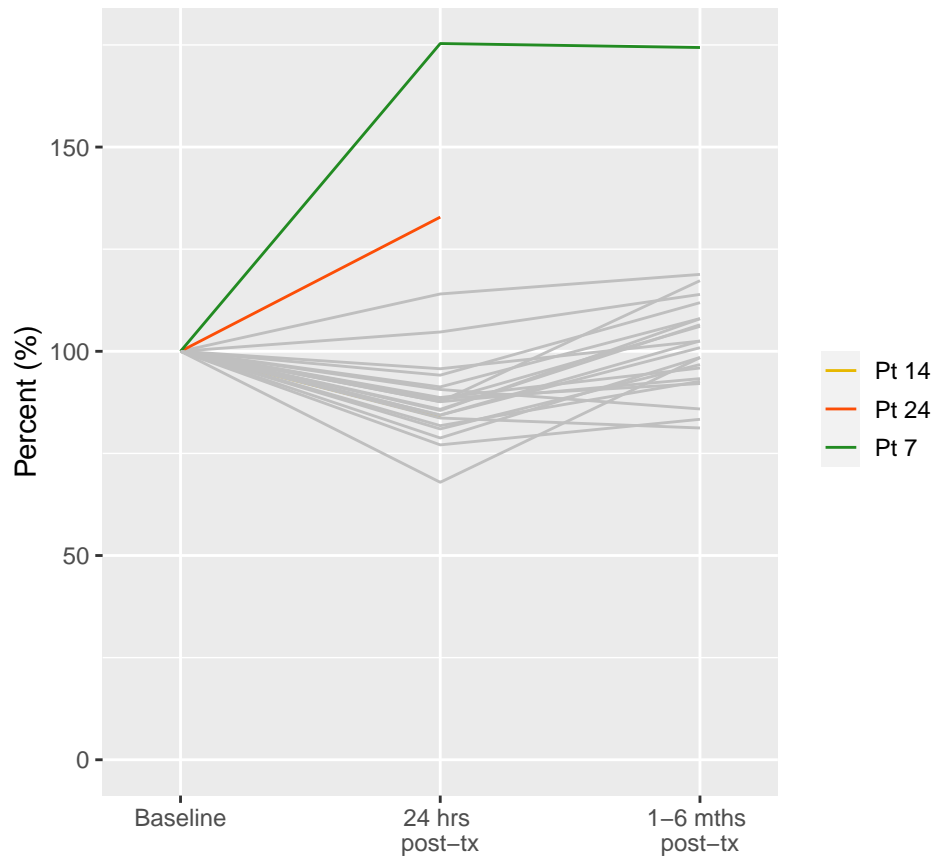



# Uniprot ID: O95274, analyte: LYPD3

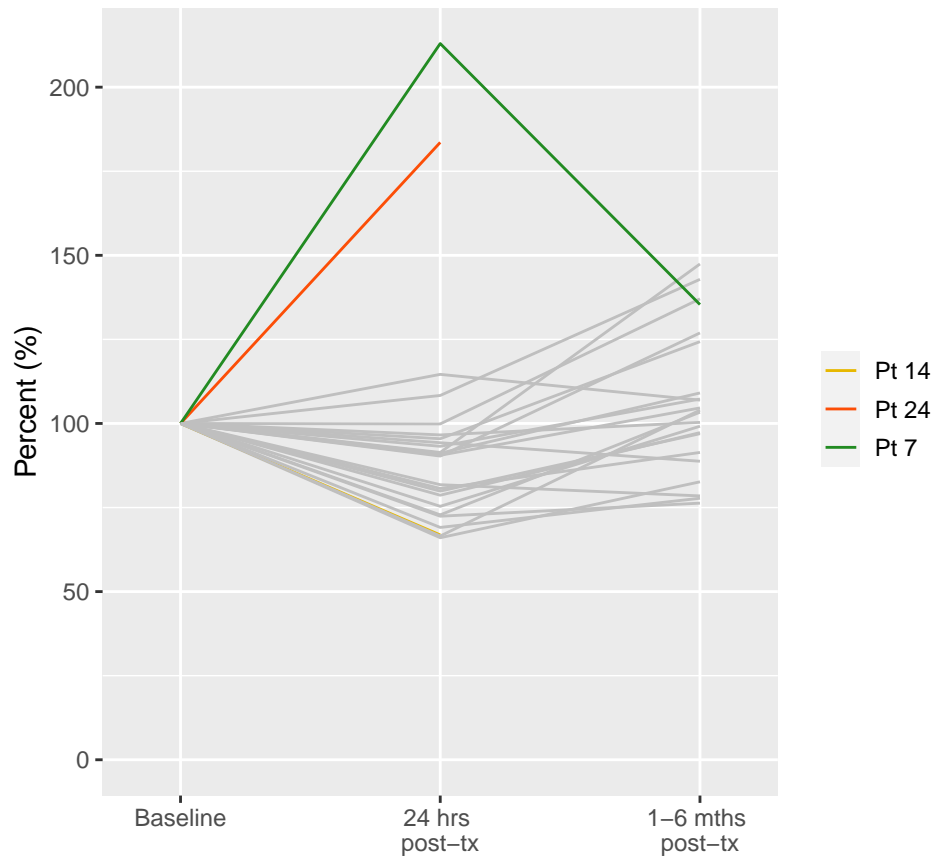

# Uniprot ID: O00592, analyte: PODXL

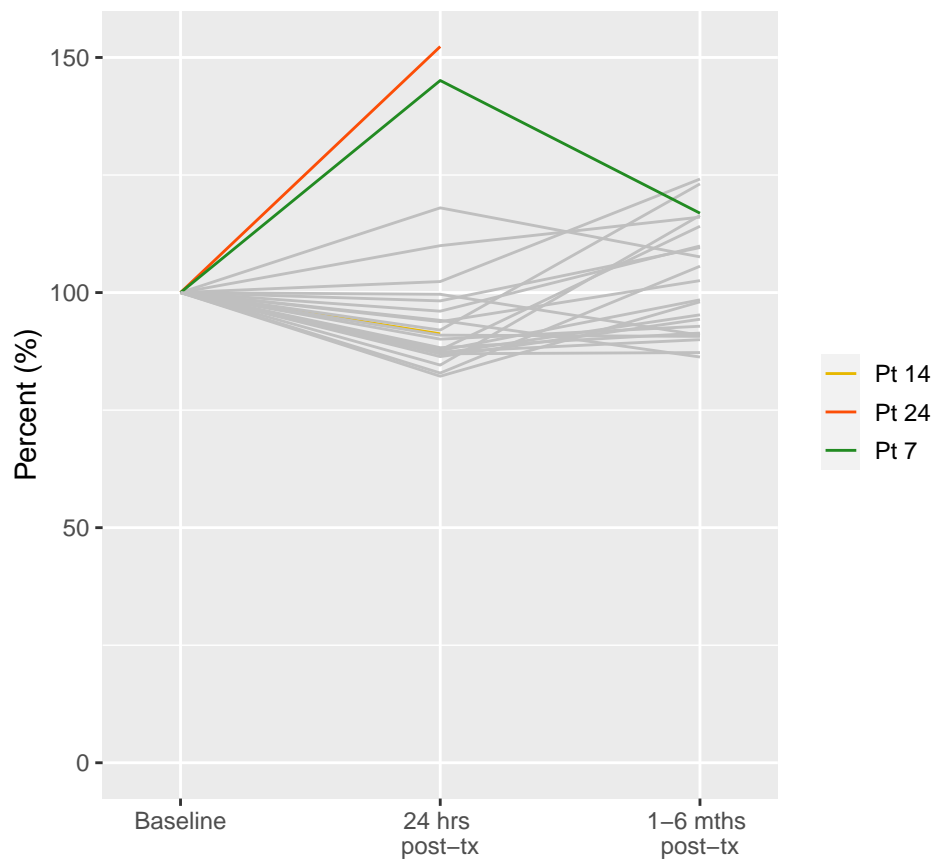

# Uniprot ID: P26447, analyte: S100A4

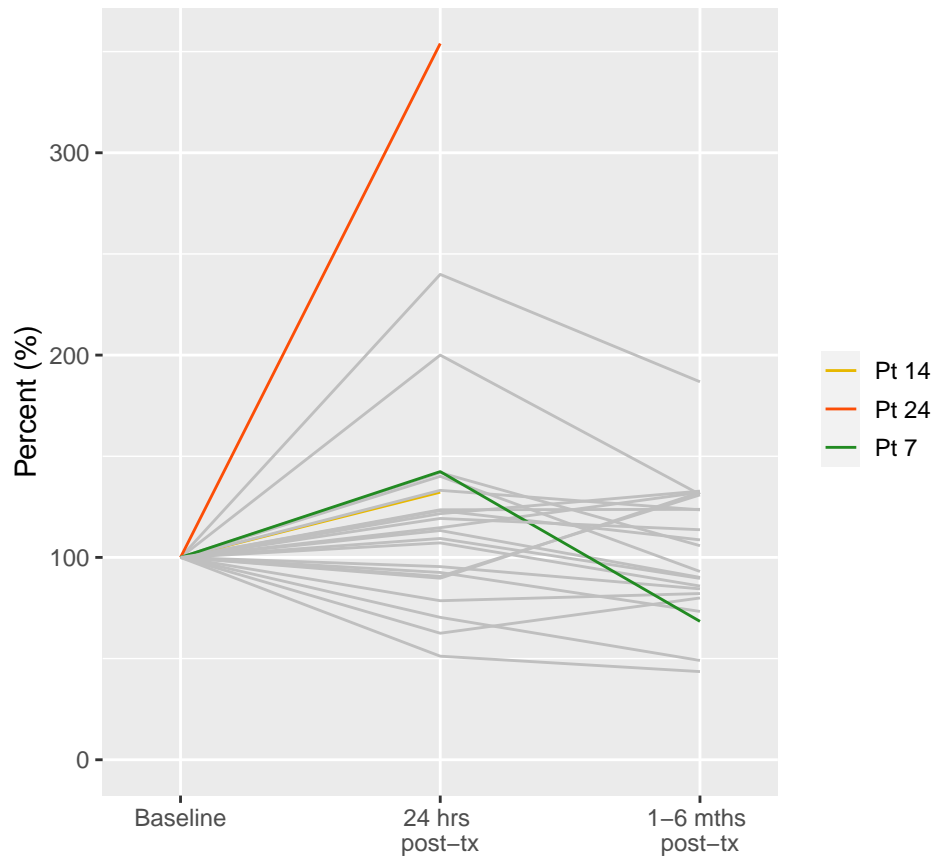

# Uniprot ID: P08069, analyte: IGF1R

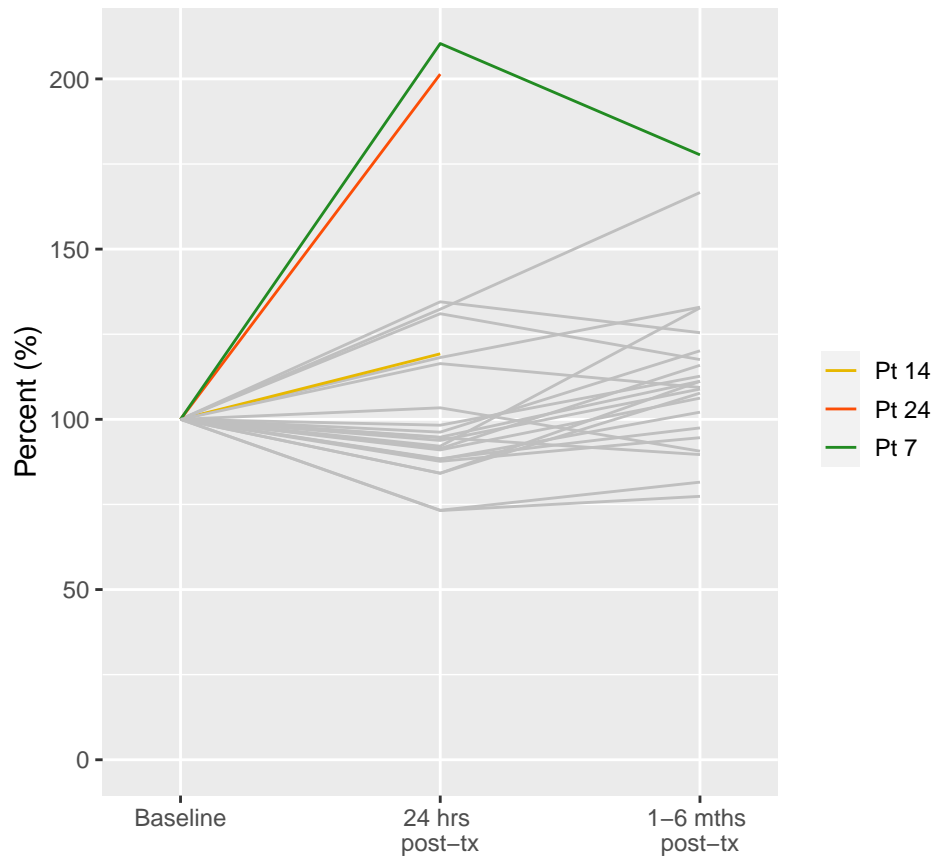

# Uniprot ID: P04626, analyte: ERBB2

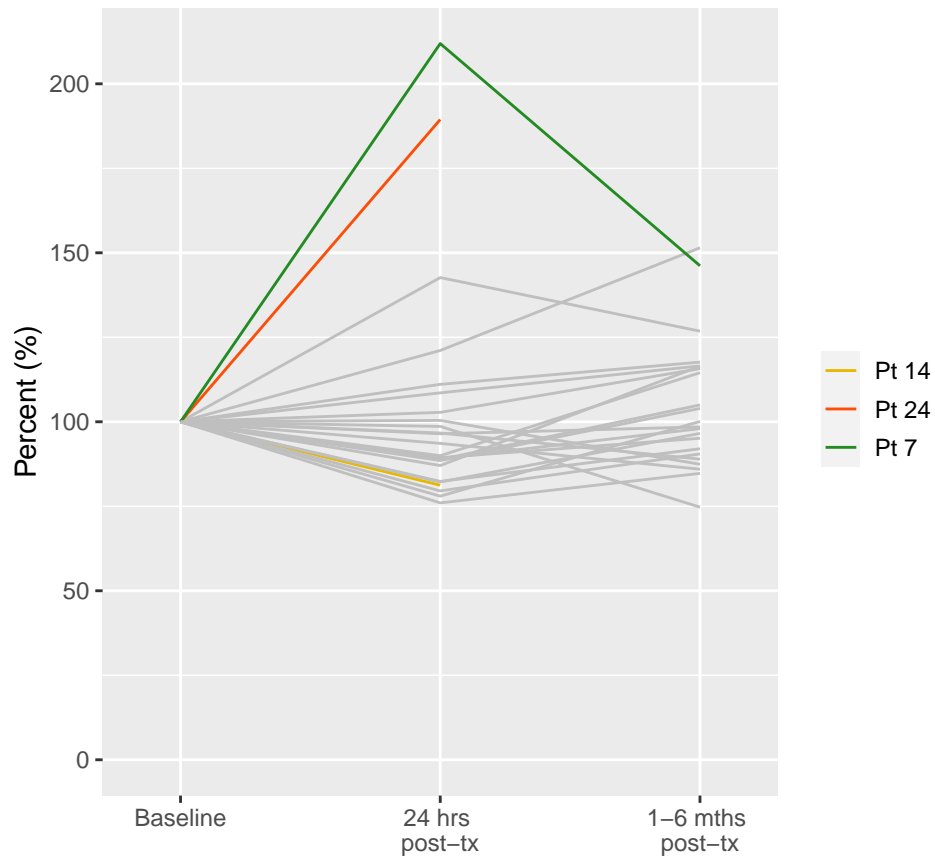

# Uniprot ID: P21860, analyte: ERBB3

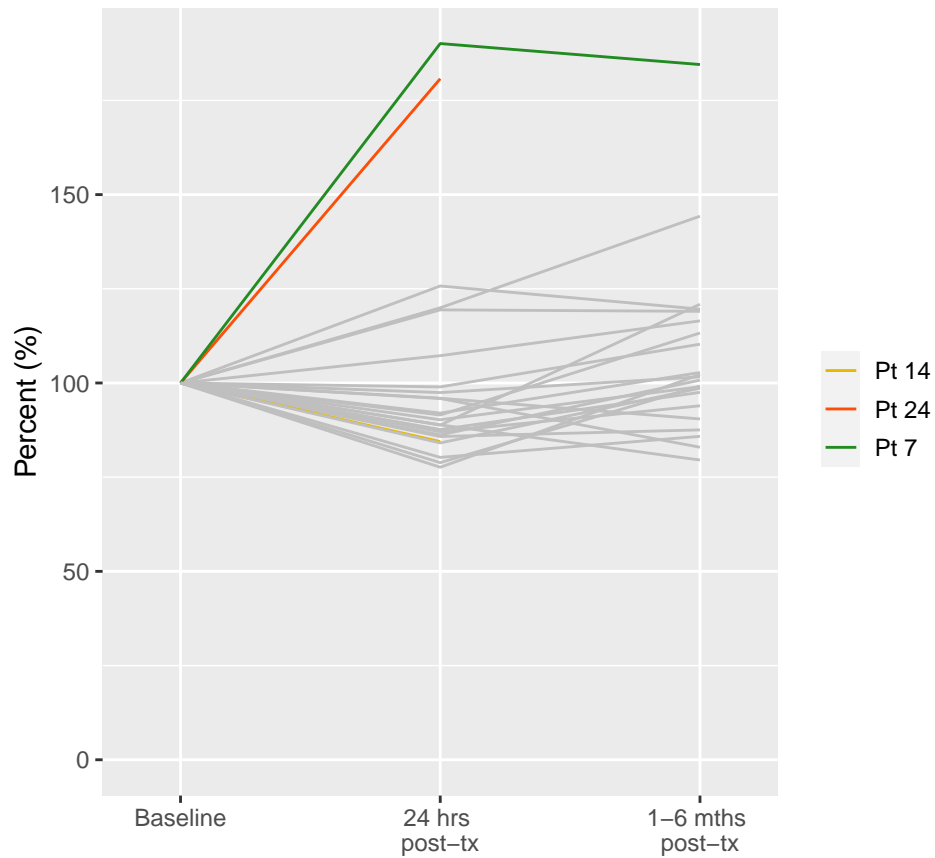

# Uniprot ID: P21583, analyte: SCF

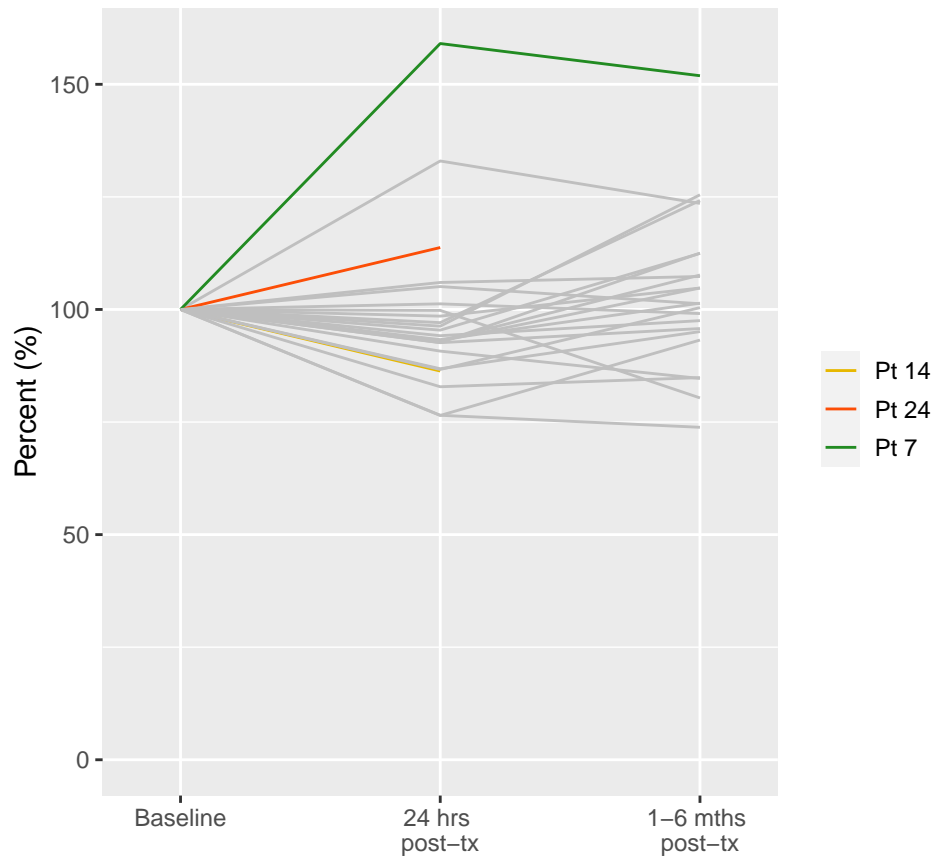

# Uniprot ID: P09486, analyte: SPARC

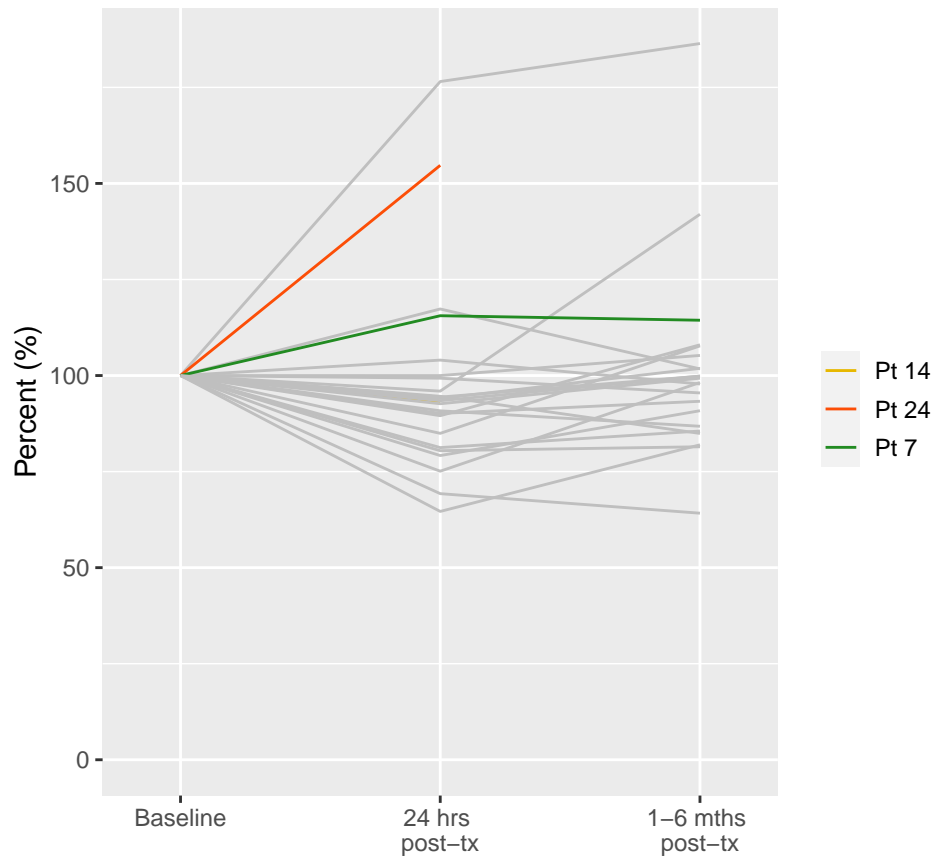



# Uniprot ID: P20718, analyte: GZMH

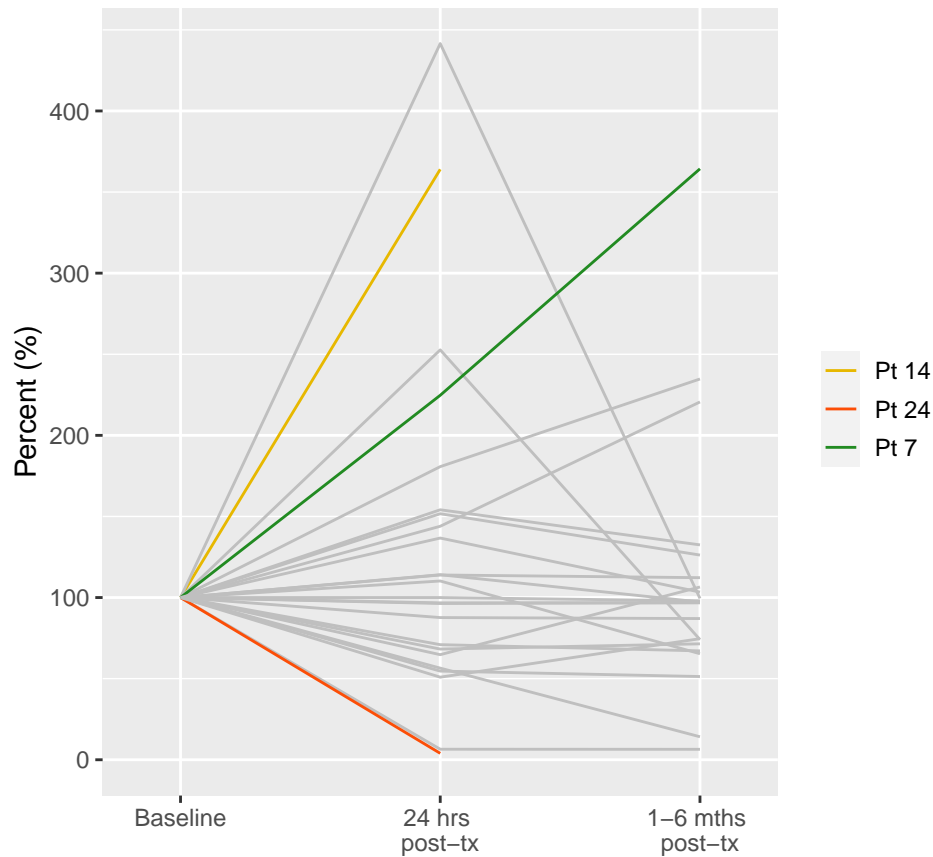

# Uniprot ID: P01135, analyte: TGF- $\alpha$

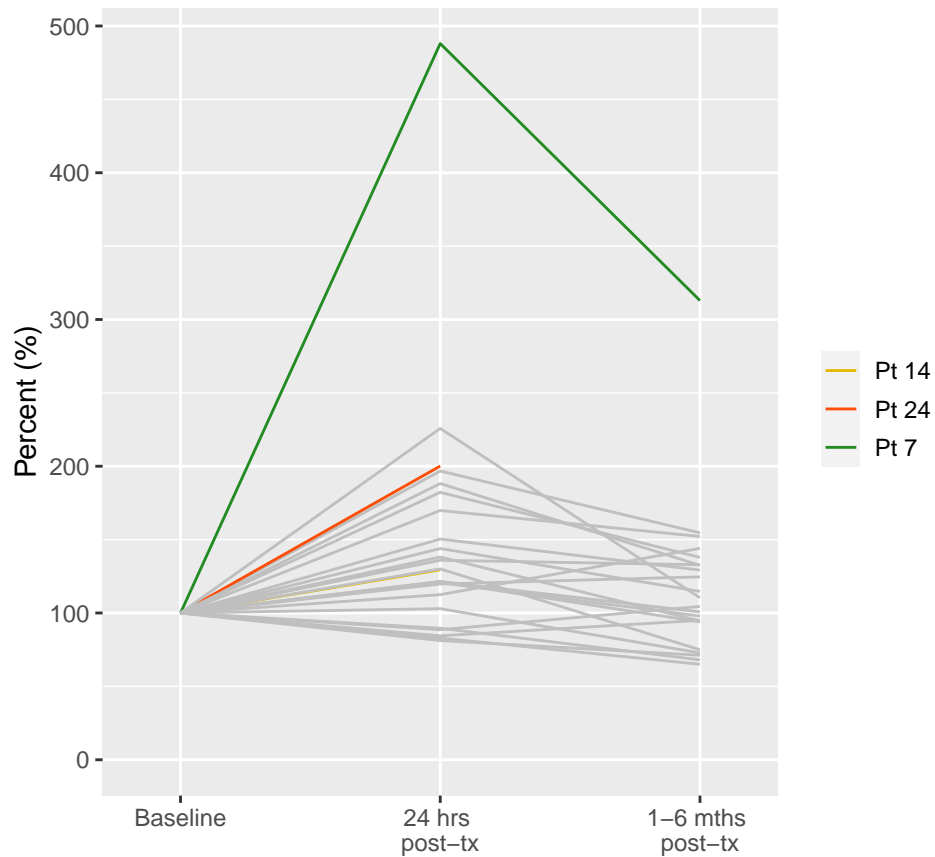

# Uniprot ID: P09958, analyte: FURIN

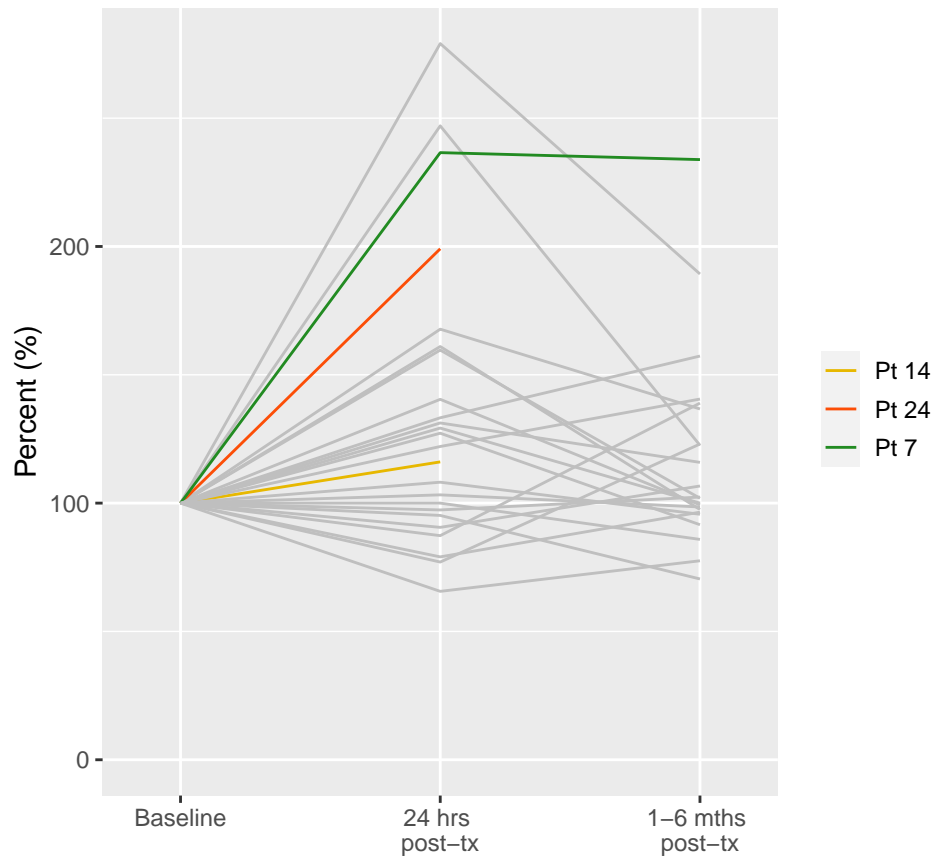

# Uniprot ID: O00622, analyte: CYR61

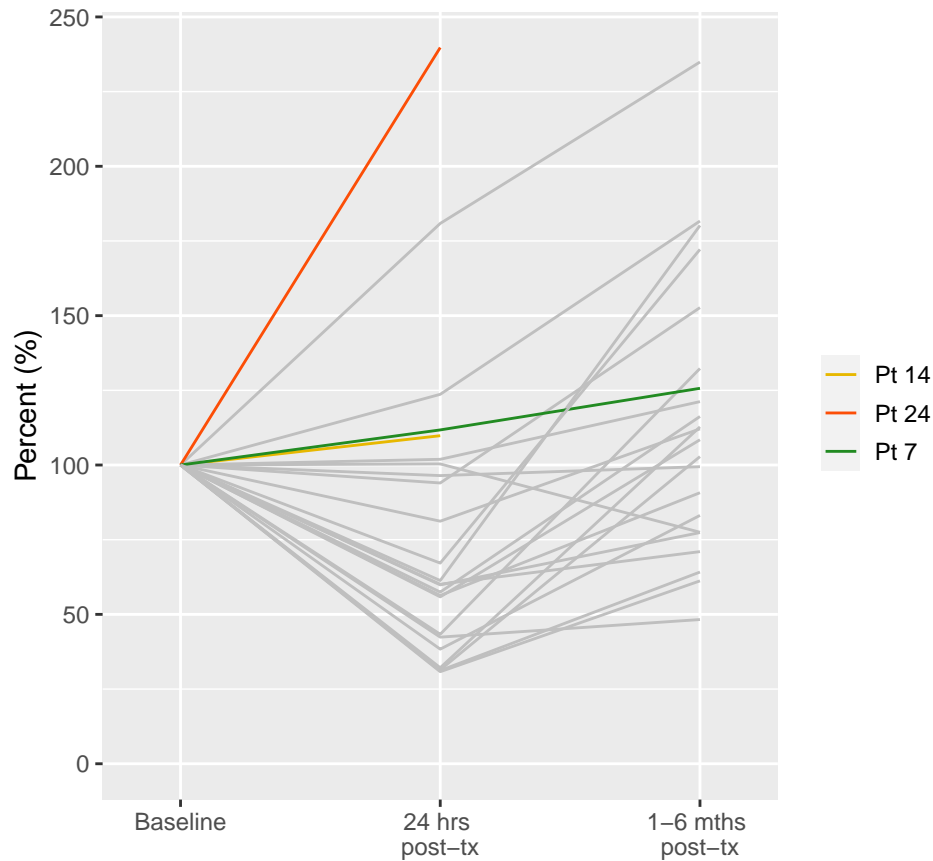

# Uniprot ID: Q9P0G3, analyte: hK14

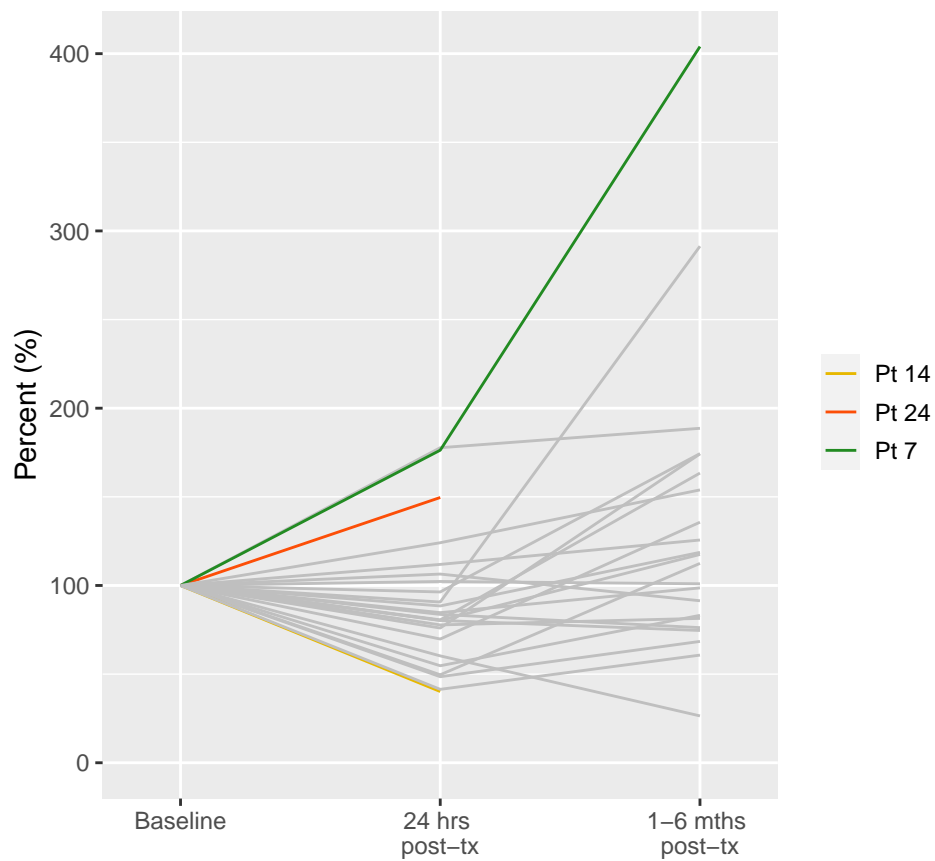

# Uniprot ID: Q13158, analyte: FADD

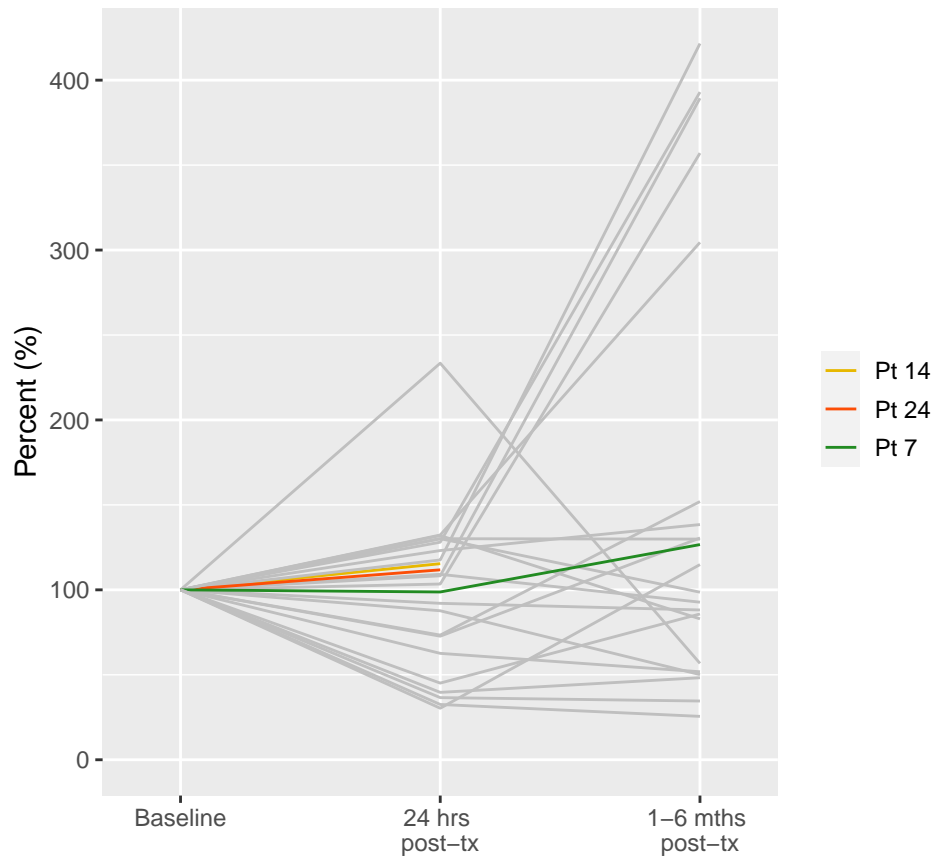

# Uniprot ID: P50579, analyte: MetAP 2

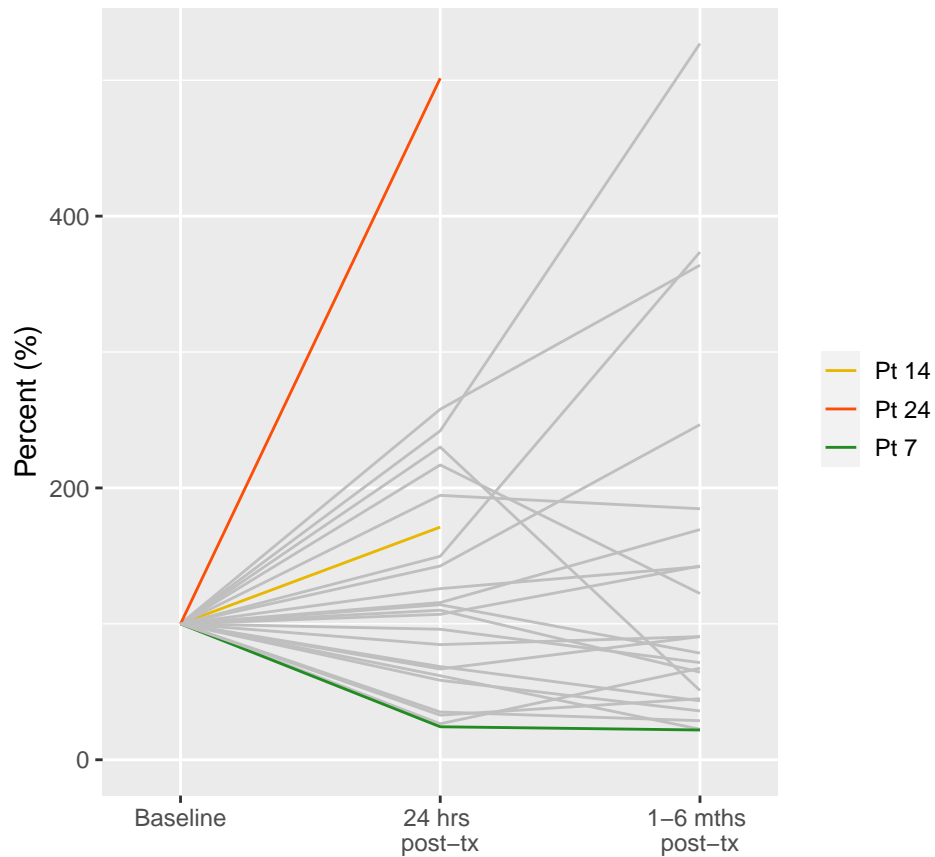

# Uniprot ID: Q96NY8, analyte: PVRL4

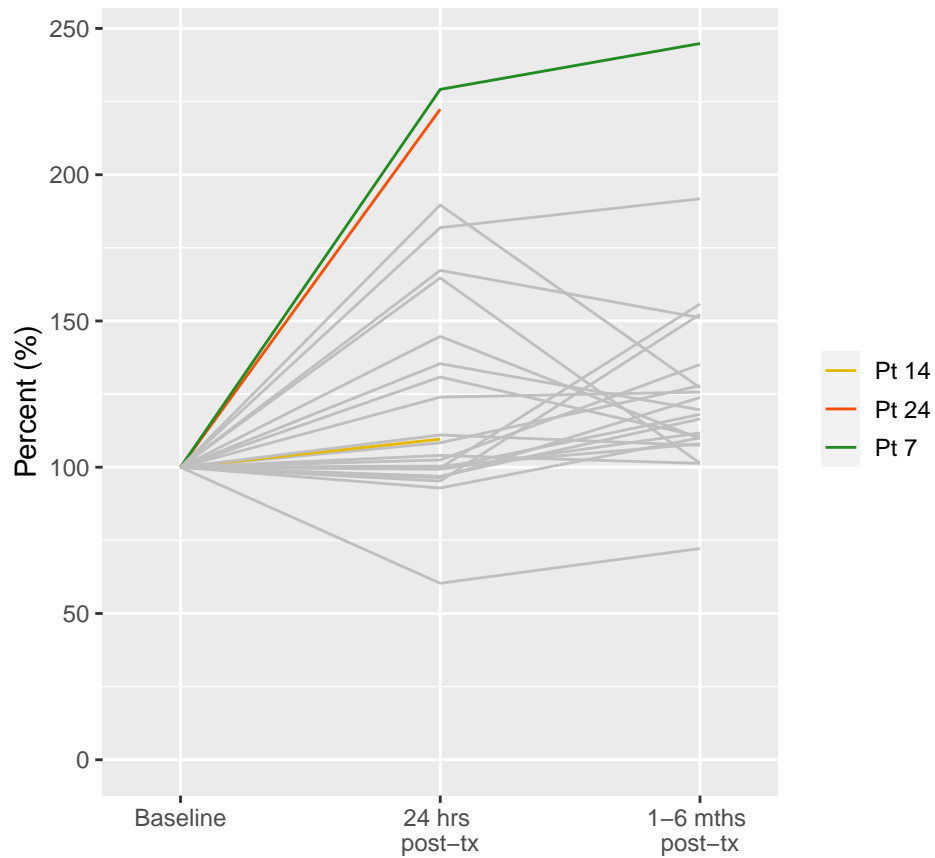



# Uniprot ID: P48023, analyte: FASLG

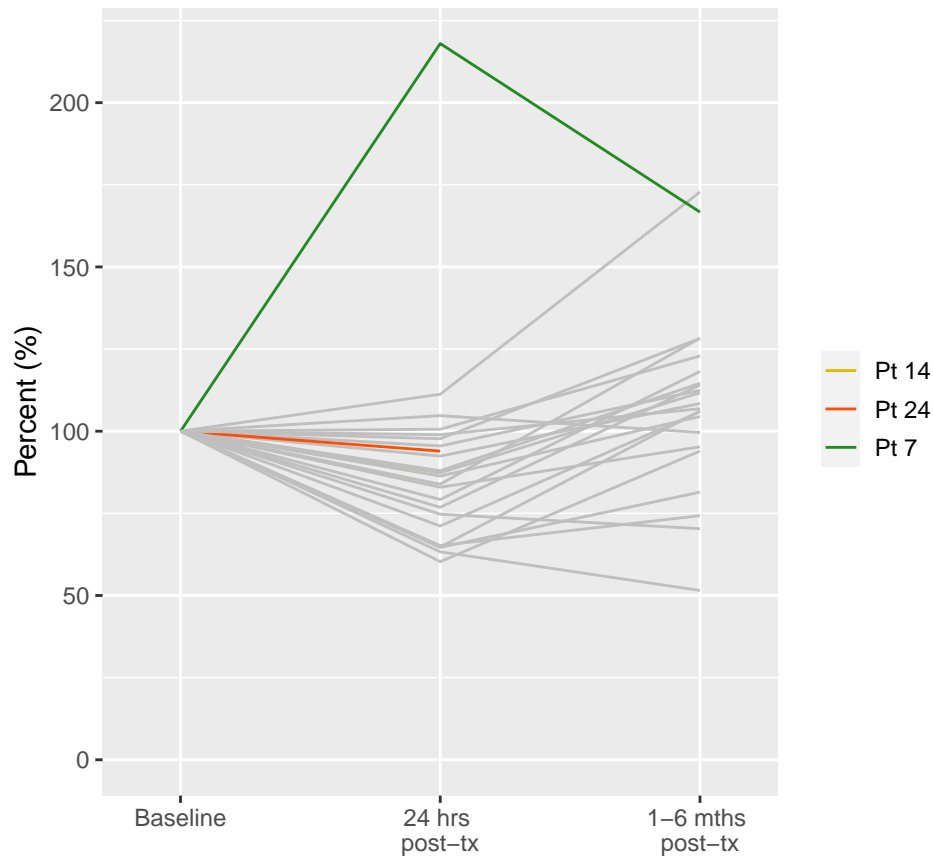

# Uniprot ID: P29317, analyte: EPHA2

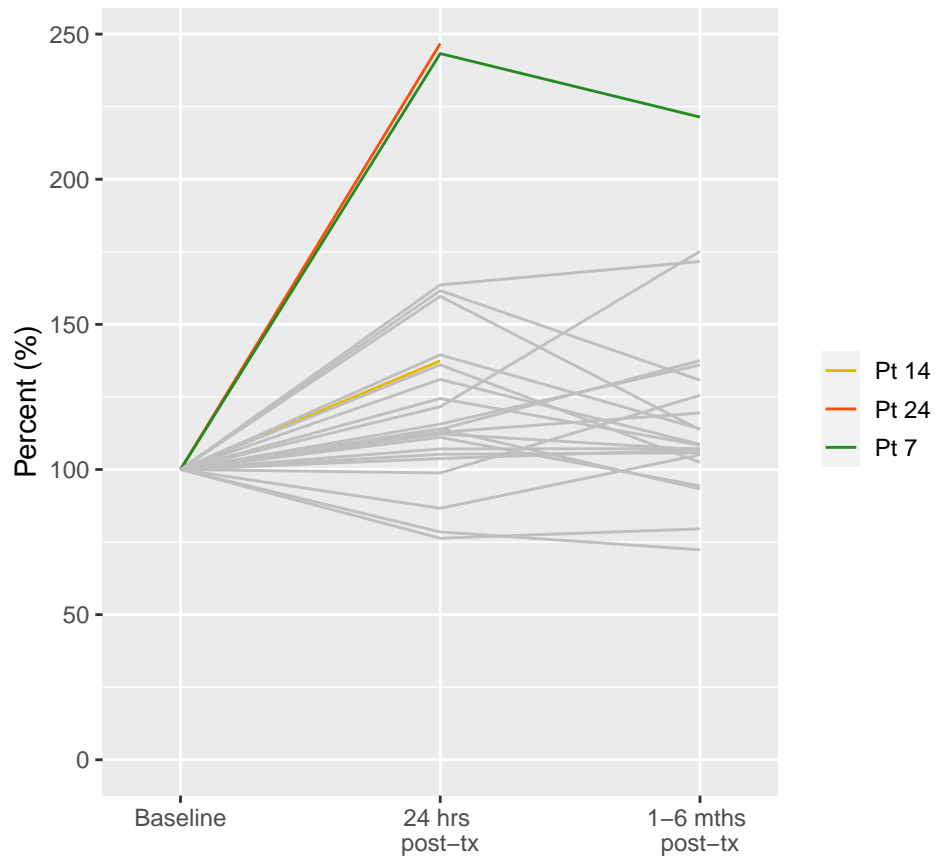

# Uniprot ID: P18084, analyte: ITGB5

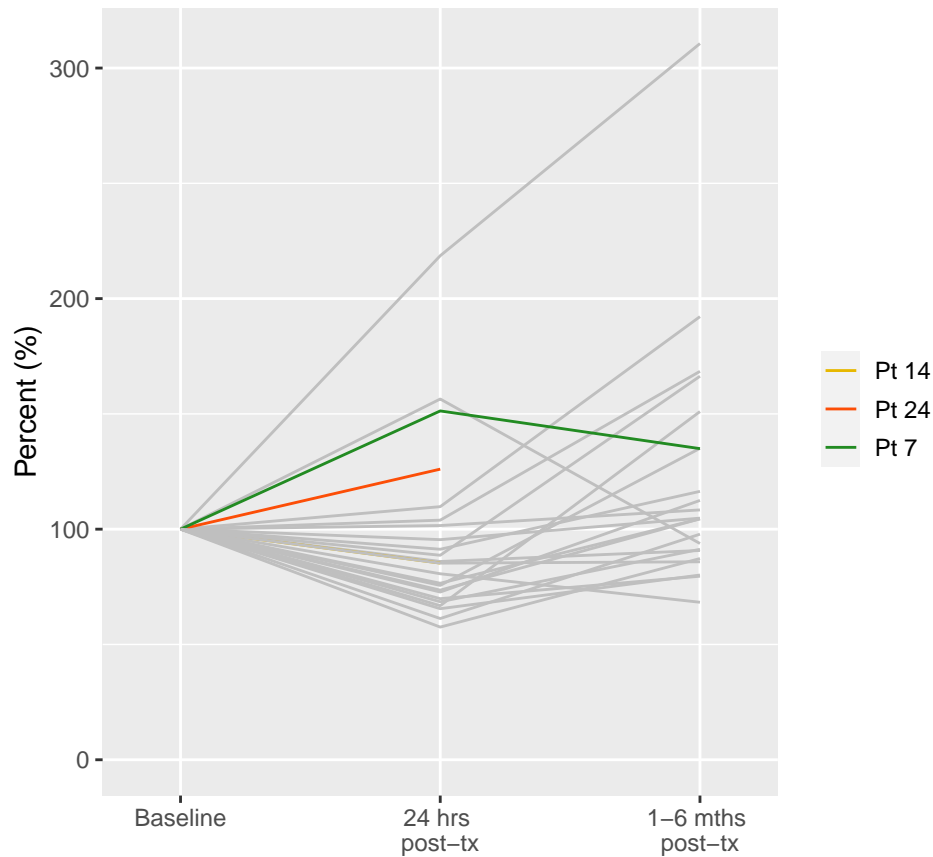

# Uniprot ID: P09382, analyte: Gal-1

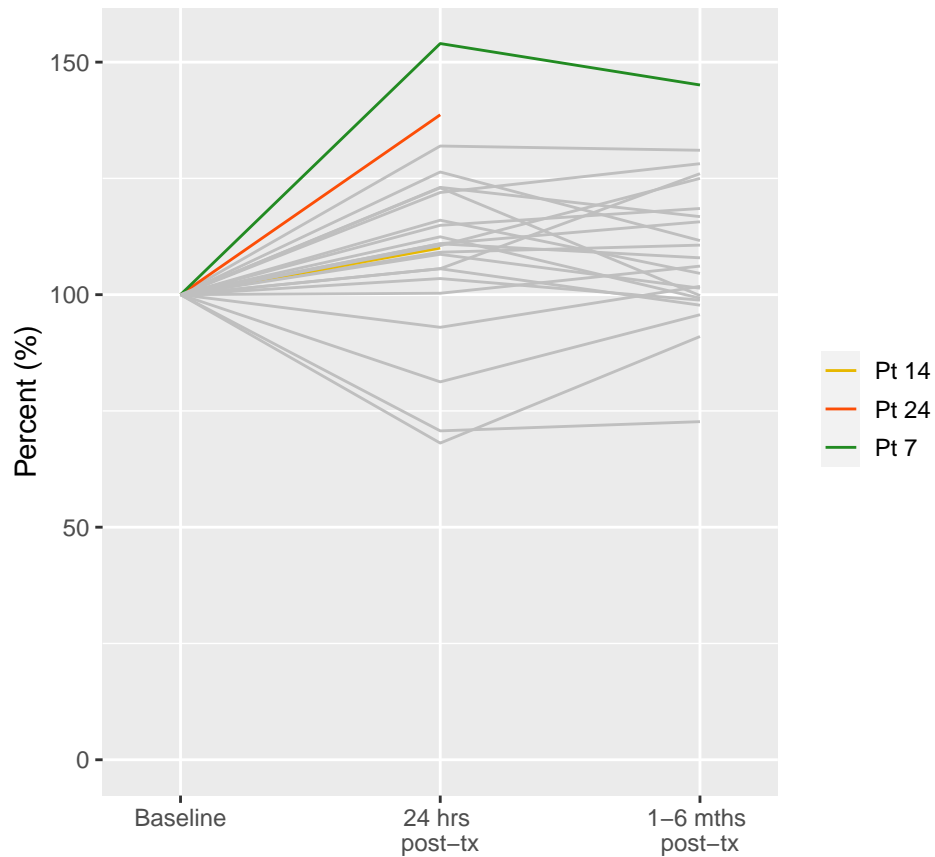

# Uniprot ID: Q9BYH1, analyte: SEZ6L

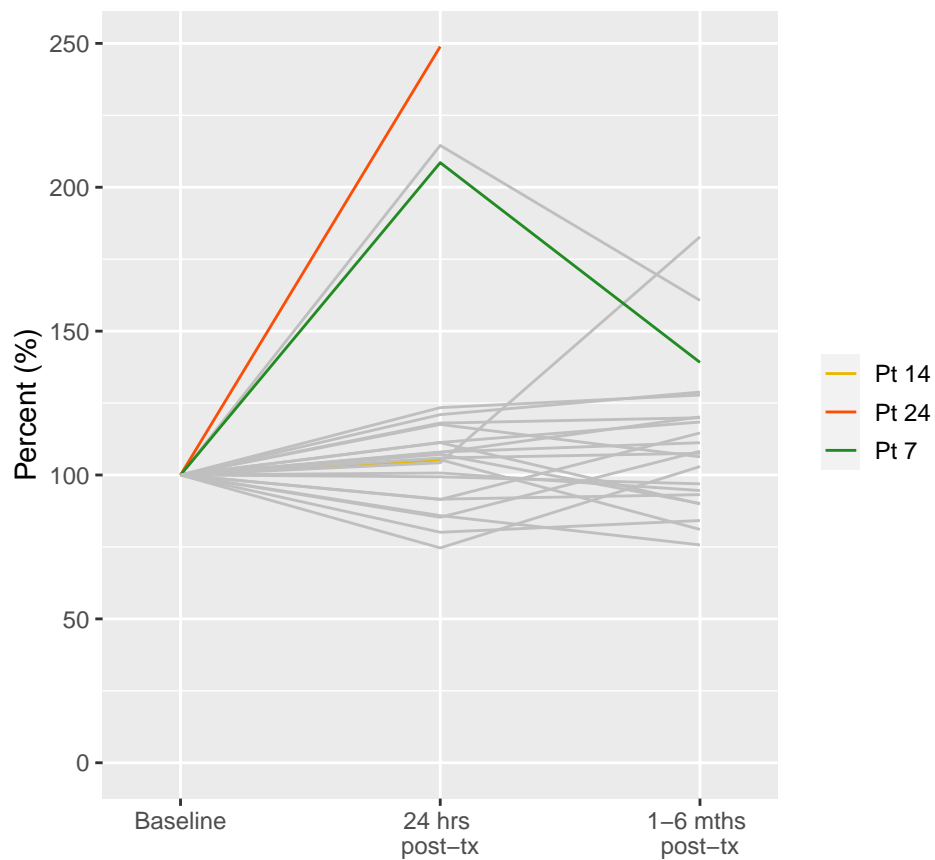

# Uniprot ID: Q14956, analyte: GPNMB

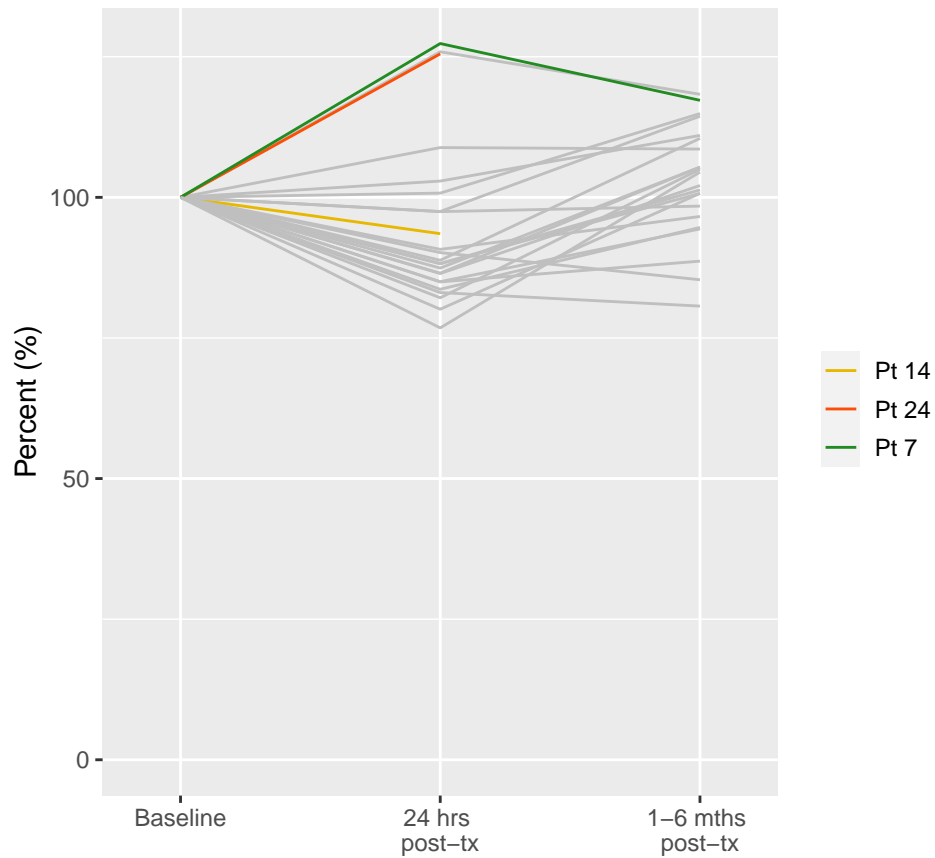

# Uniprot ID: Q16790, analyte: CAIX

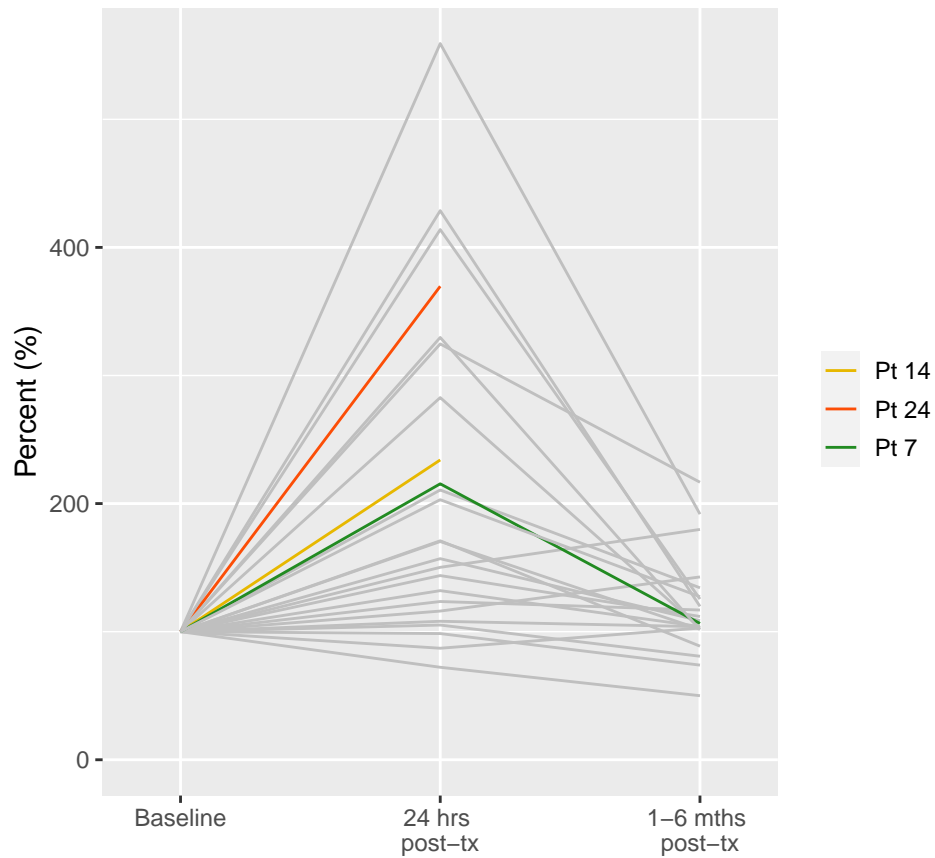

# Uniprot ID: Q16674, analyte: MIA

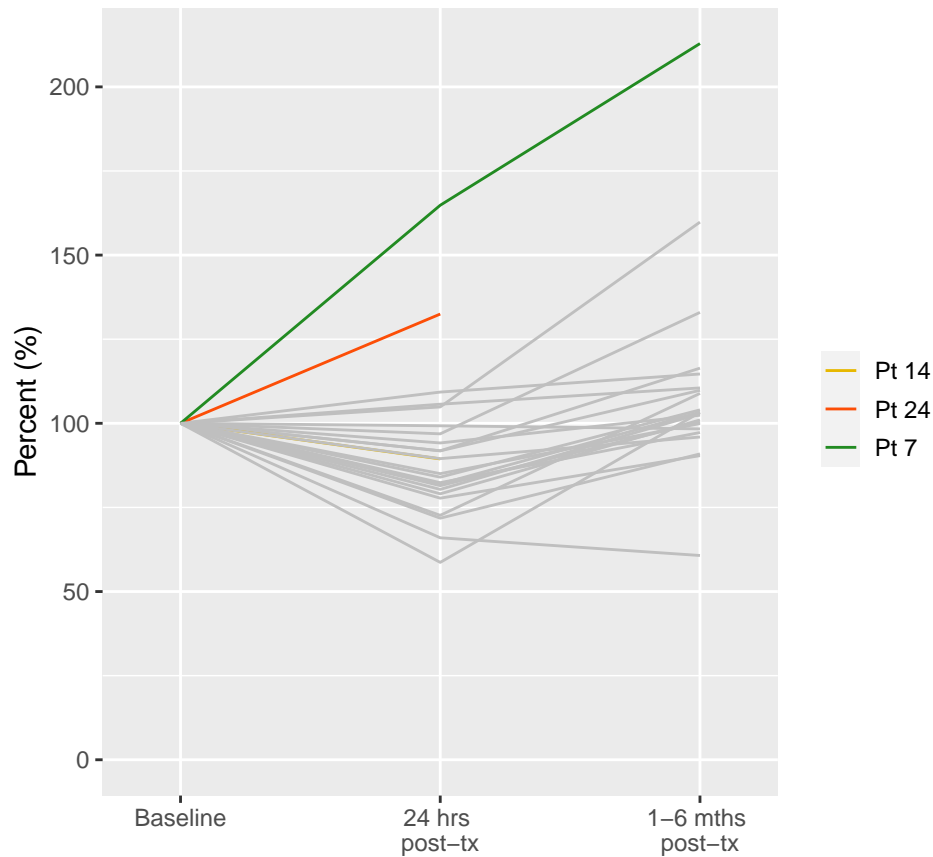



# Uniprot ID: O60911, analyte: CTSV

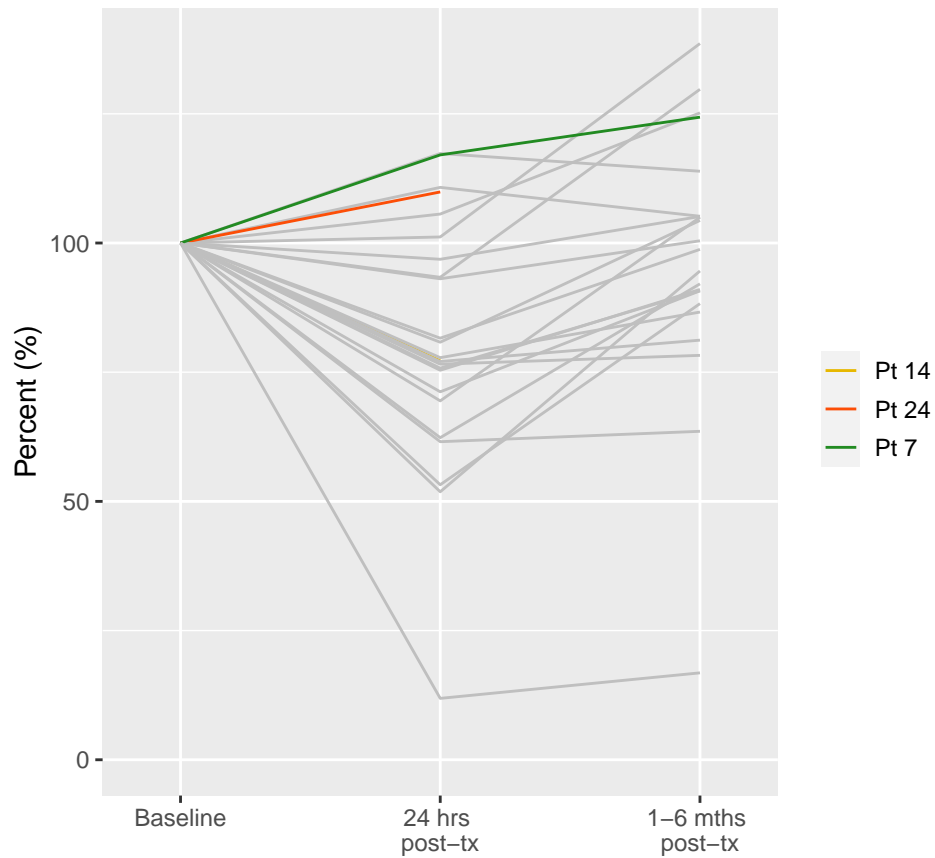

# Uniprot ID: P26842, analyte: CD27

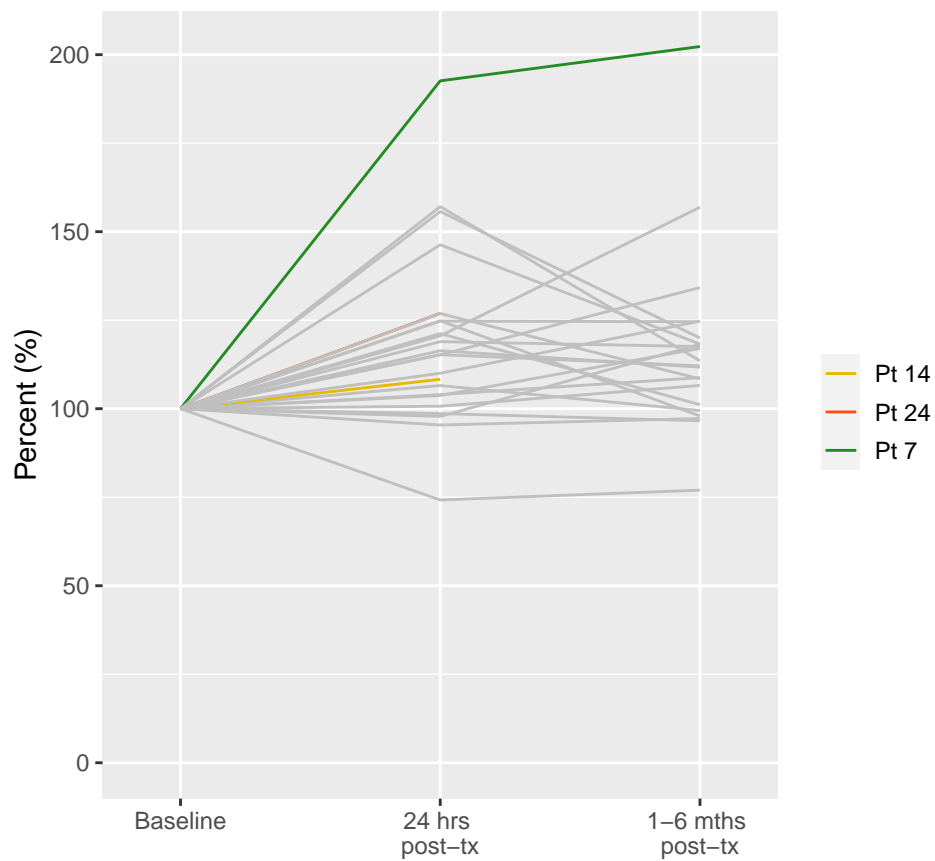

# Uniprot ID: O43895, analyte: XPNPEP2

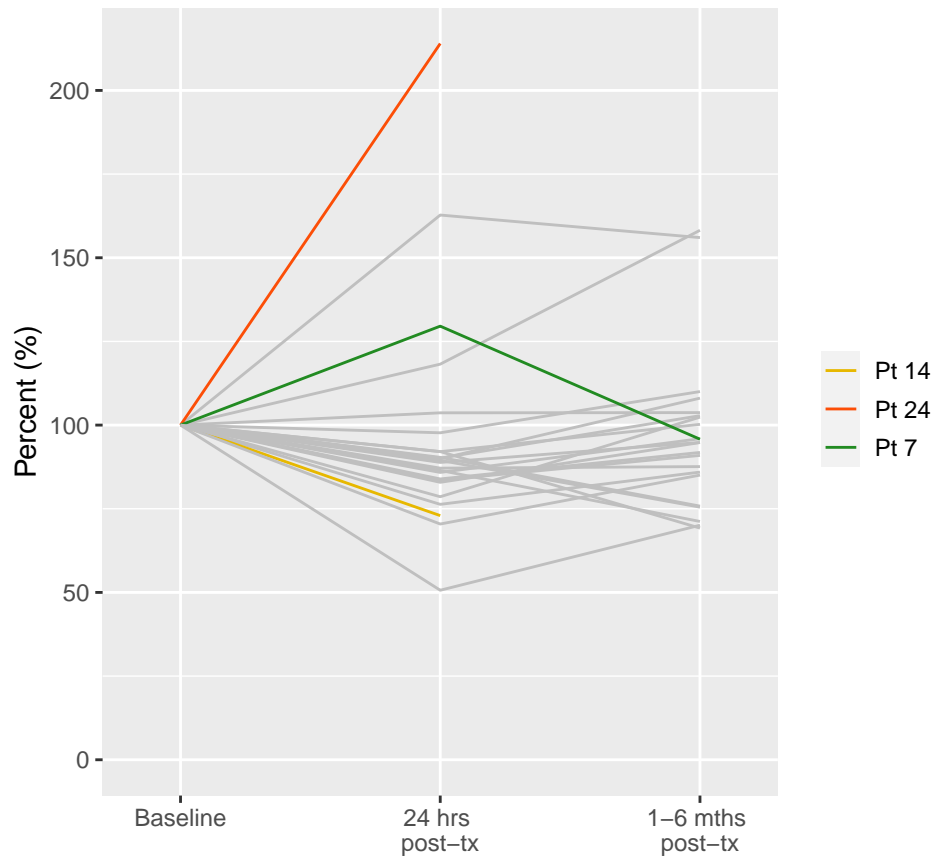

# Uniprot ID: Q15303, analyte: ERBB4

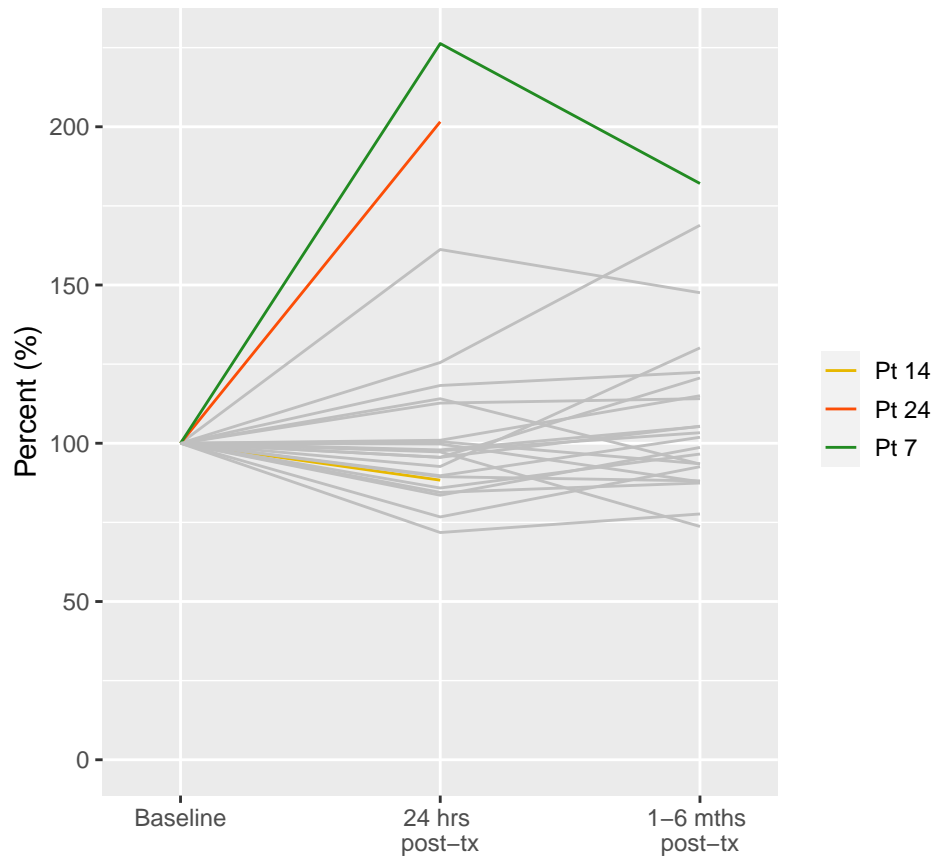

# Uniprot ID: P14210, analyte: HGF

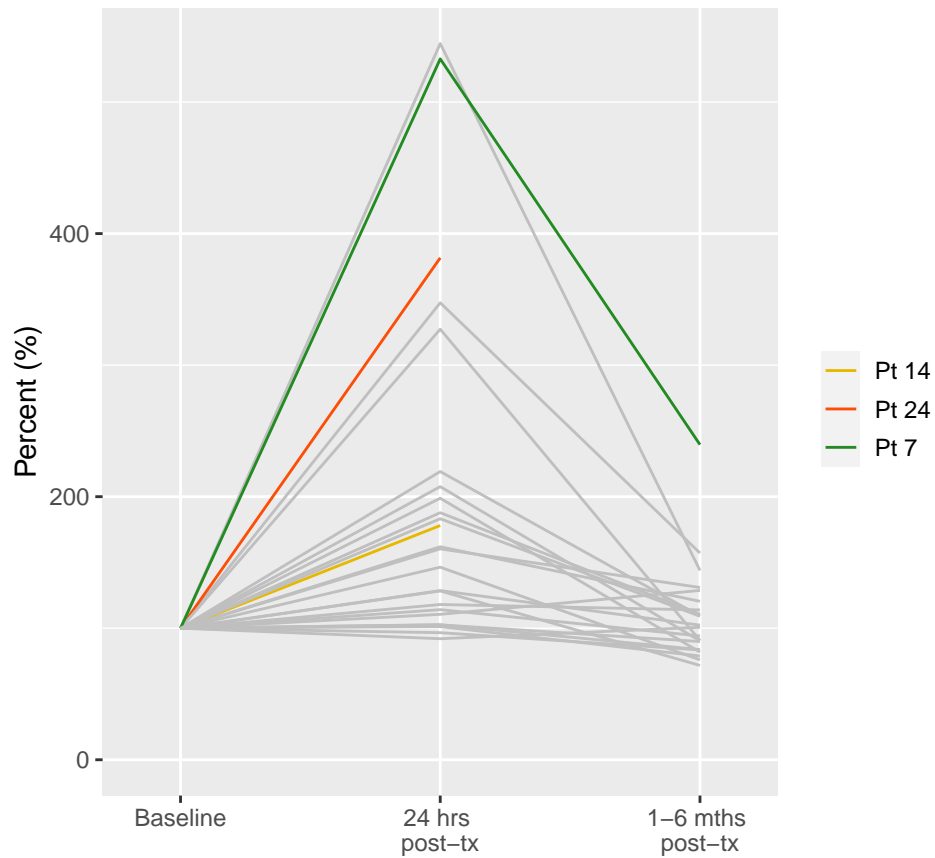

# Uniprot ID: P78325, analyte: ADAM 8

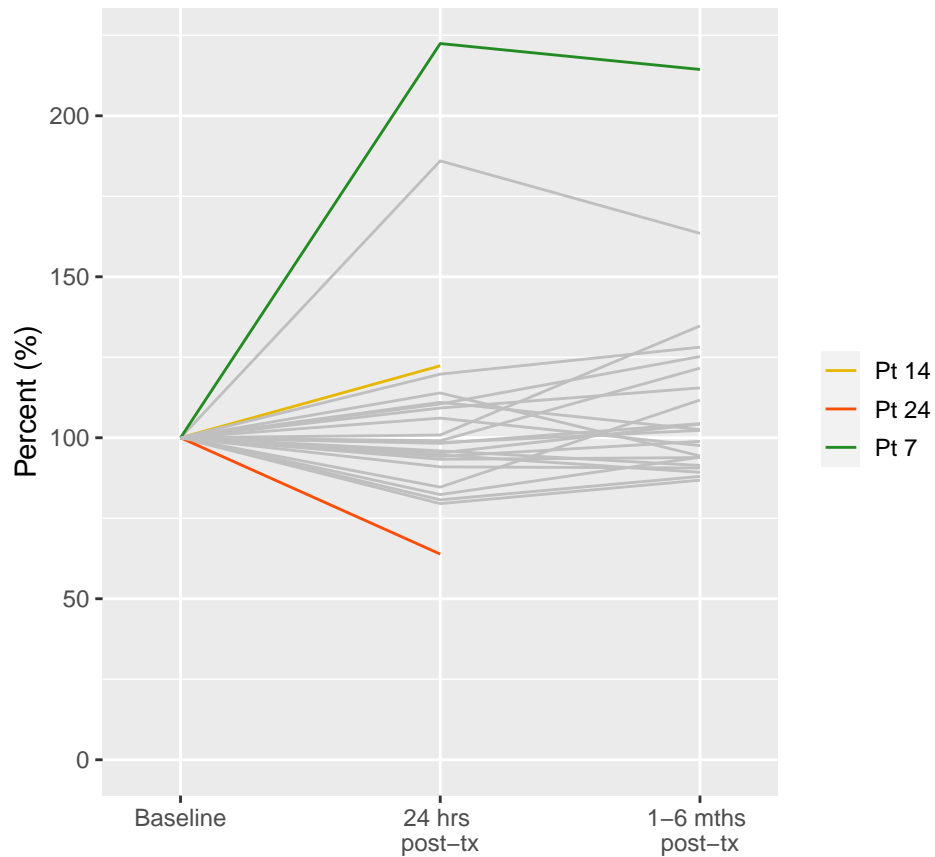

# Uniprot ID: P21589, analyte: 5'-NT

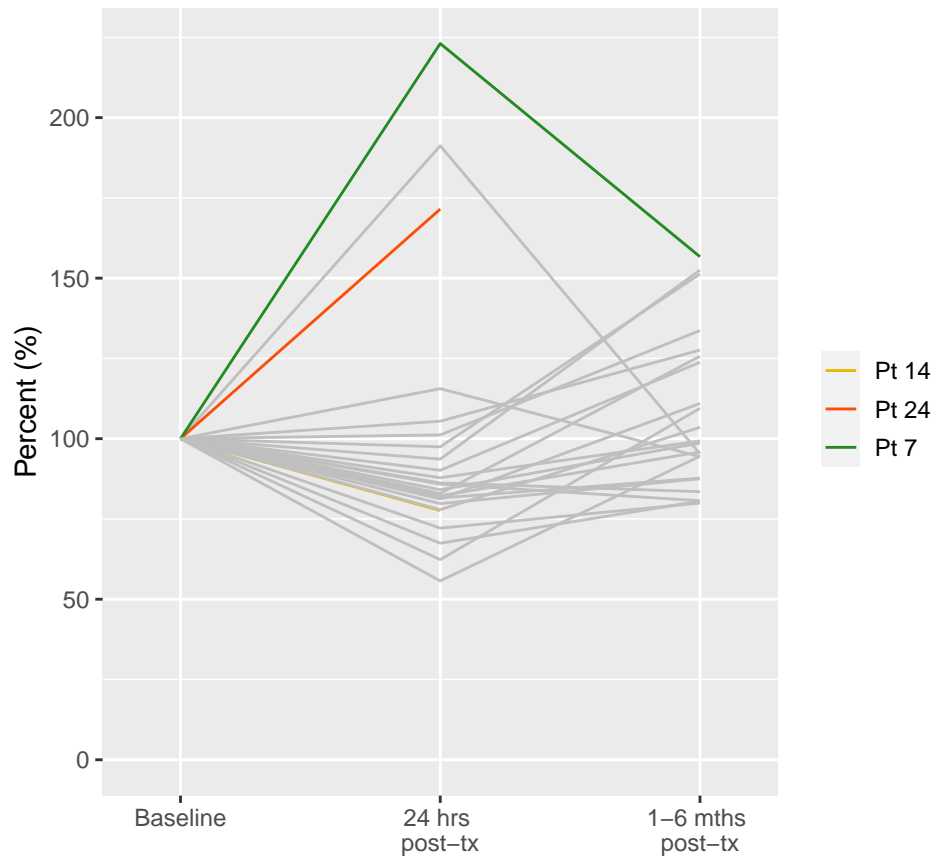

# Uniprot ID: P38936, analyte: CDKN1A

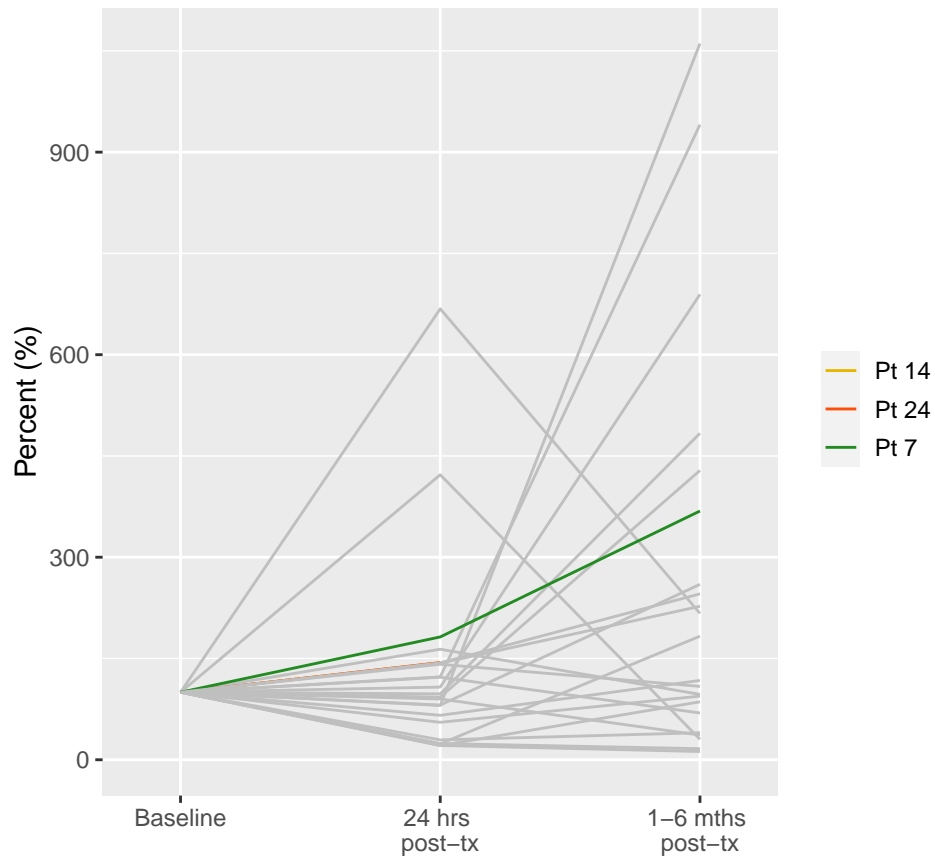



# Uniprot ID: O00548, analyte: DLL1

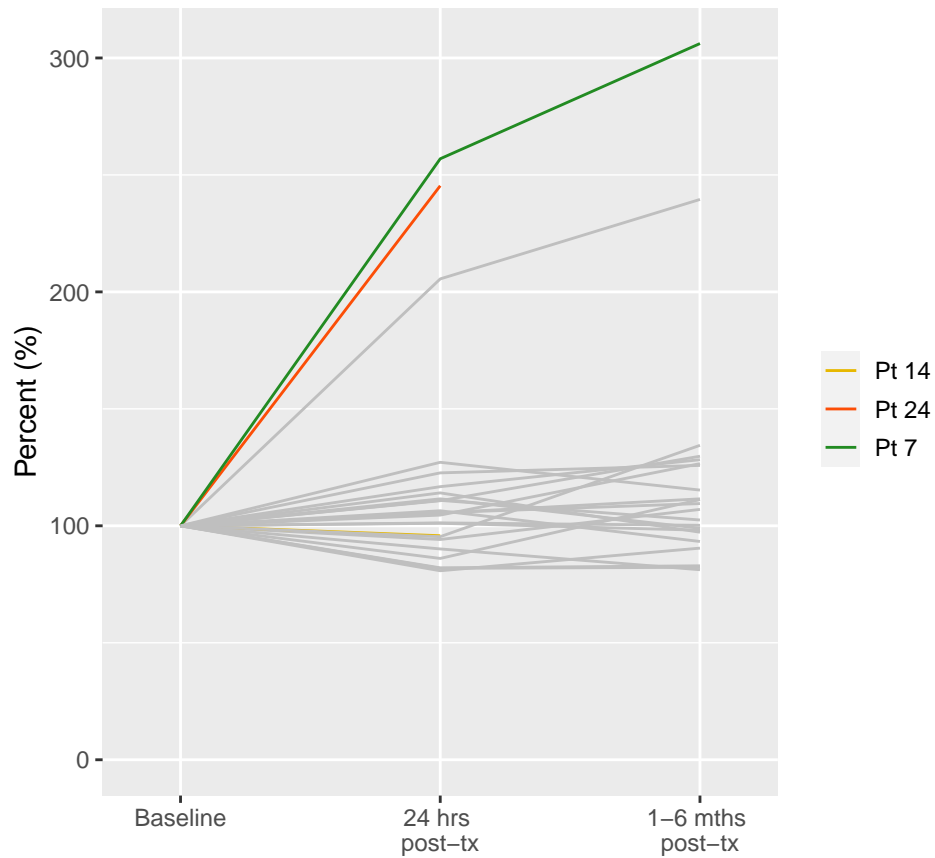

# Uniprot ID: P21741, analyte: MK

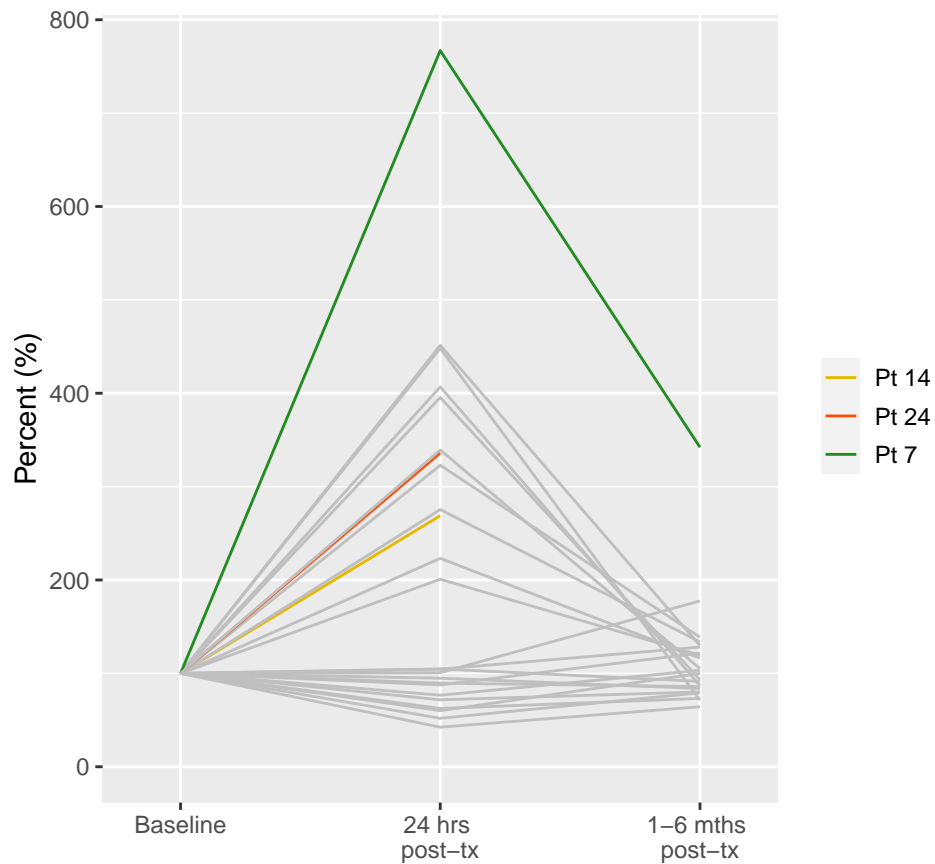

# Uniprot ID: P00519, analyte: ABL1

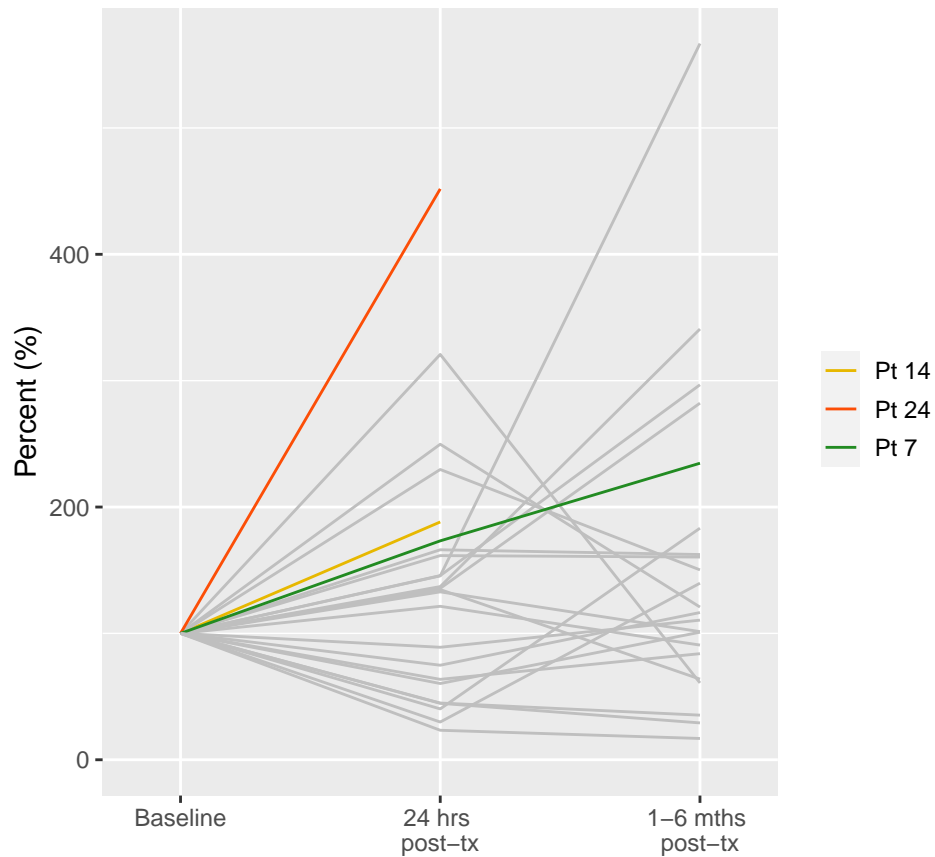

# Uniprot ID: Q14512, analyte: FGF-BP1

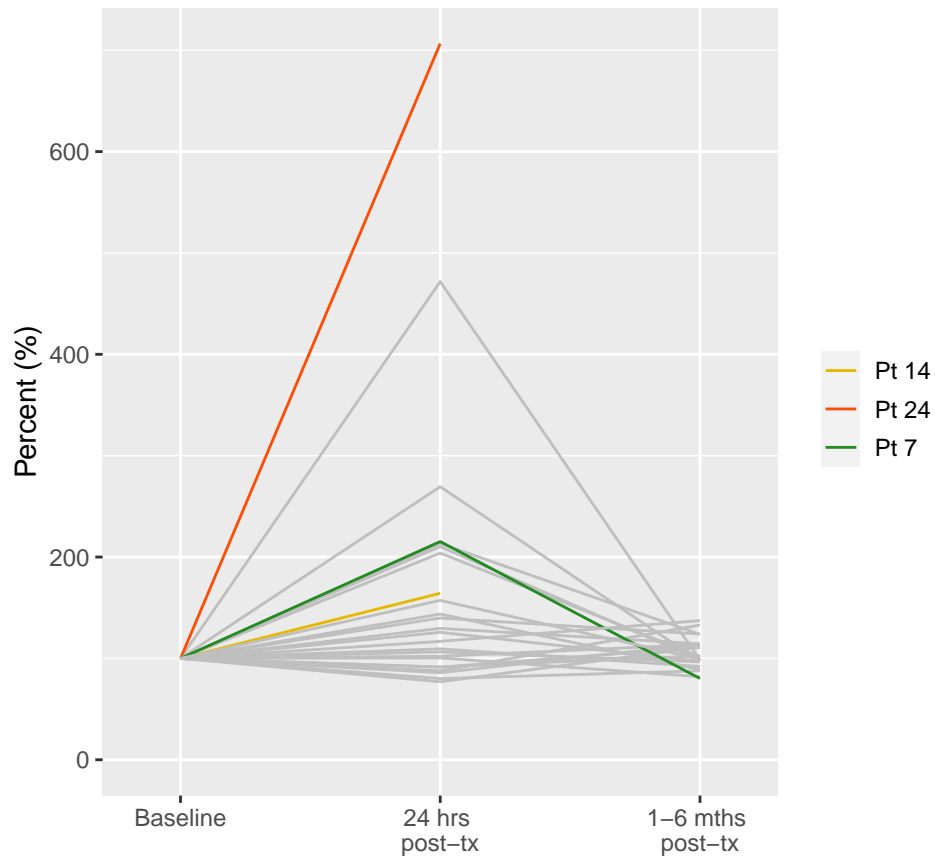

# Uniprot ID: O15455, analyte: TLR3

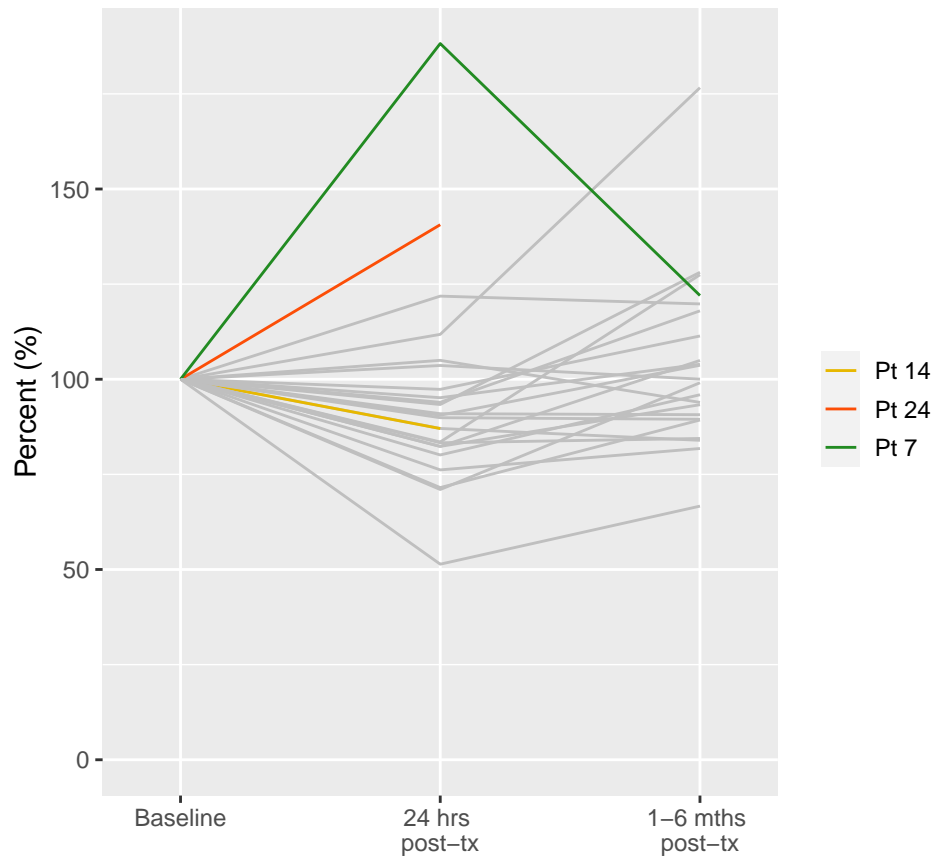

# Uniprot ID: P07948, analyte: LYN

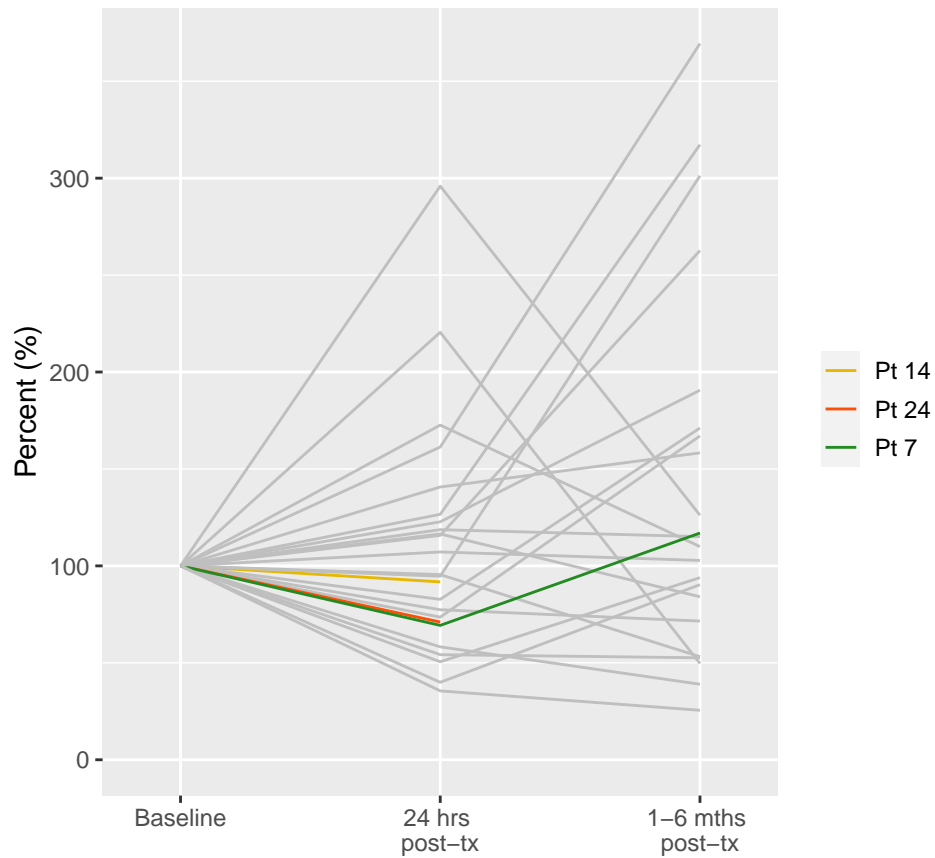

# Uniprot ID: P07949, analyte: RET

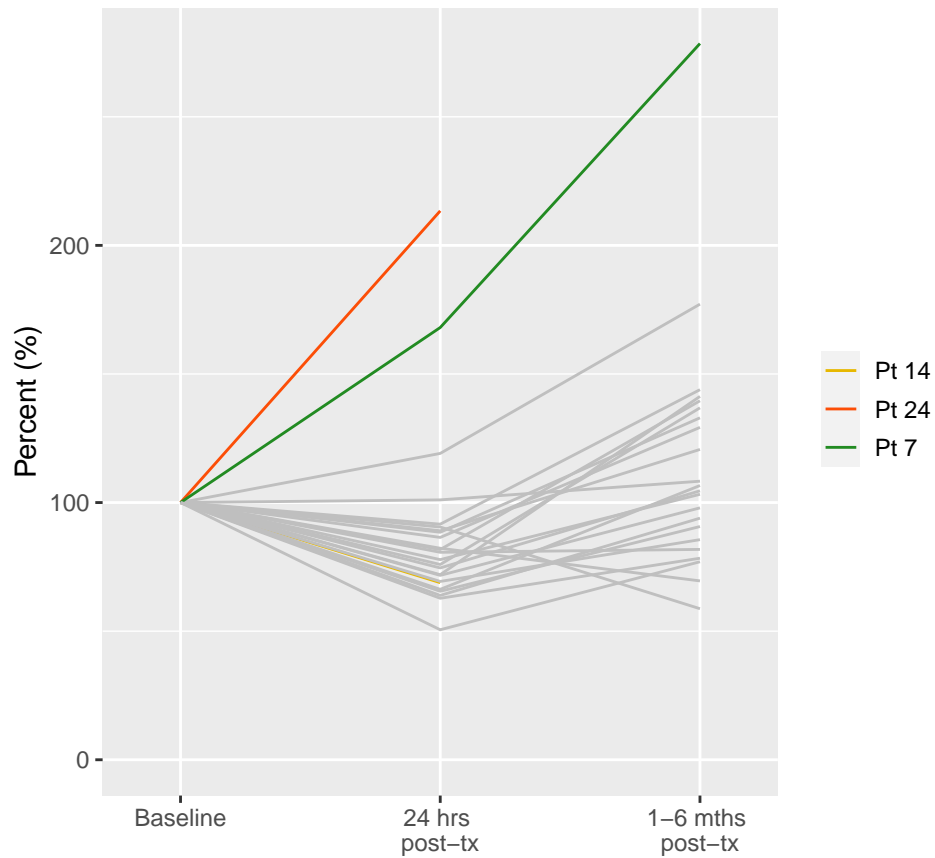

# Uniprot ID: P08670, analyte: VIM

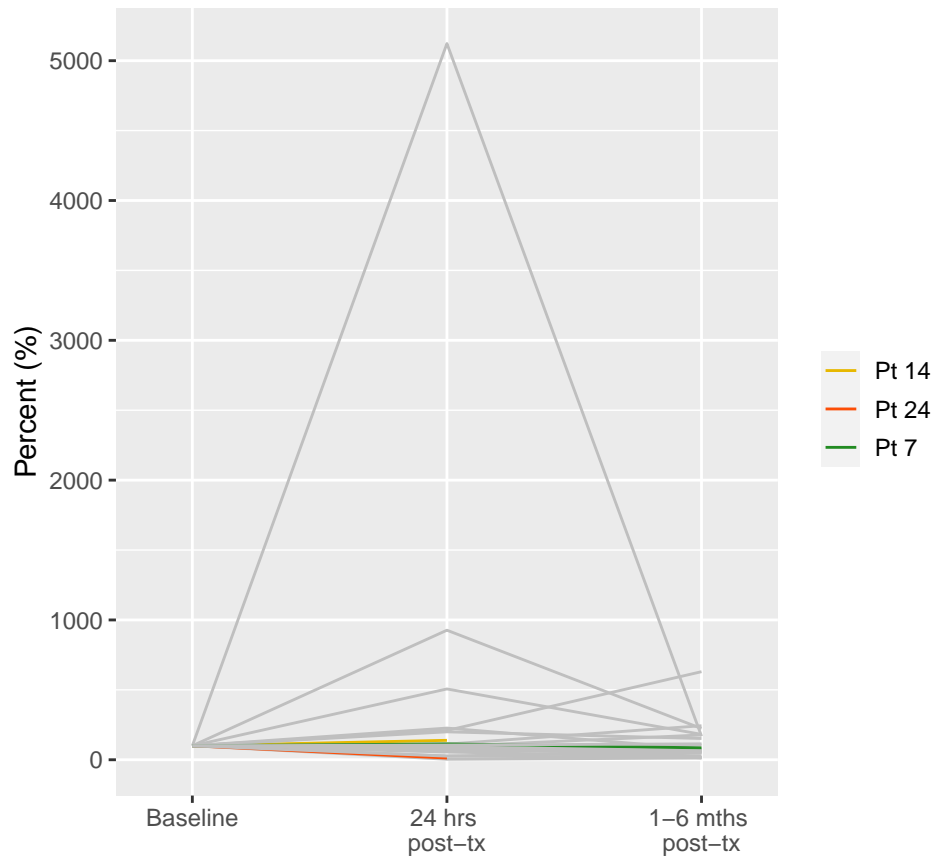



# Uniprot ID: Q9NS68, analyte: TNFRSF19

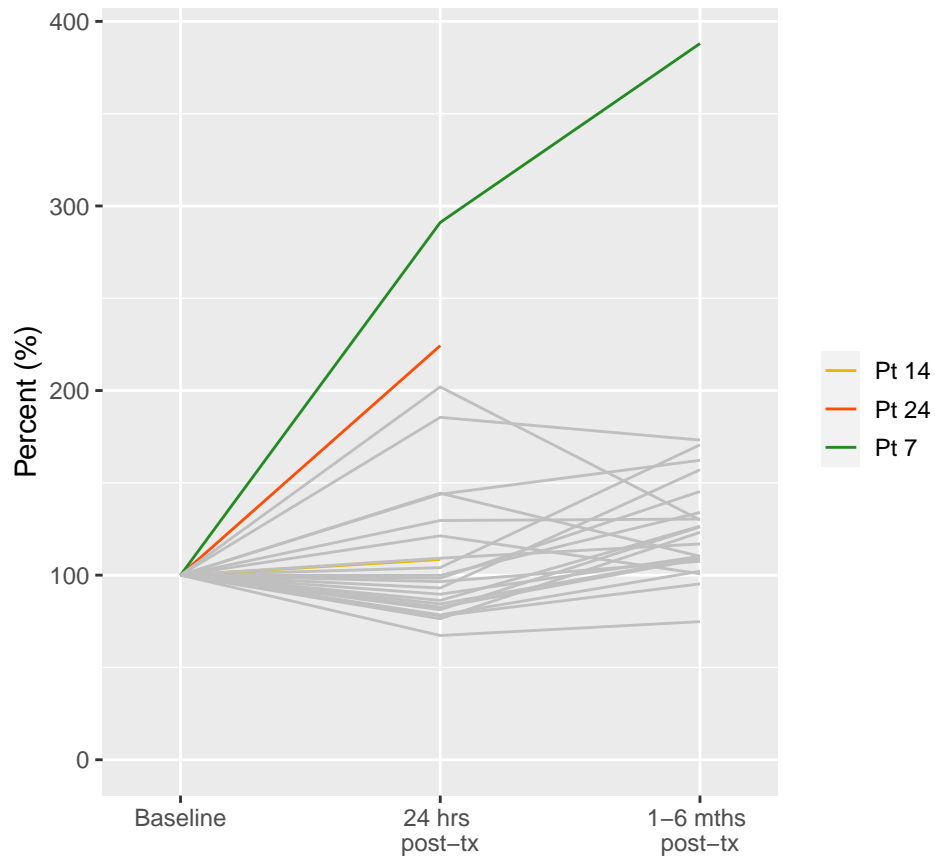

# Uniprot ID: Q9UBG3, analyte: CRNN

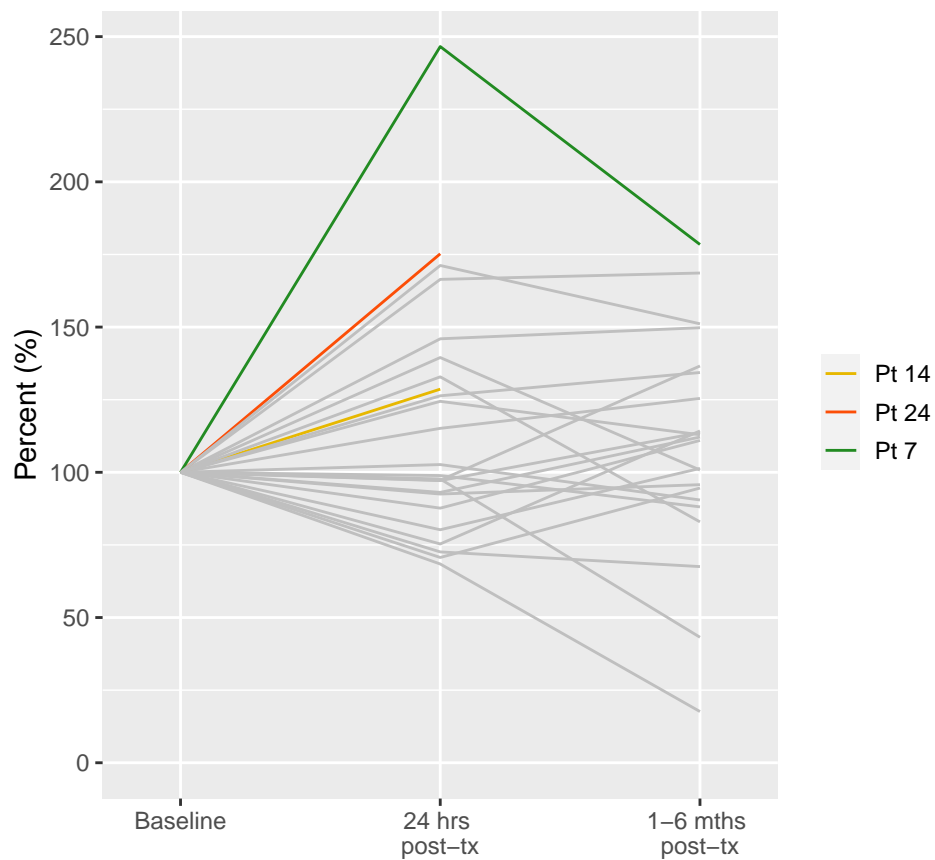

# Uniprot ID: P56279, analyte: TCL1A

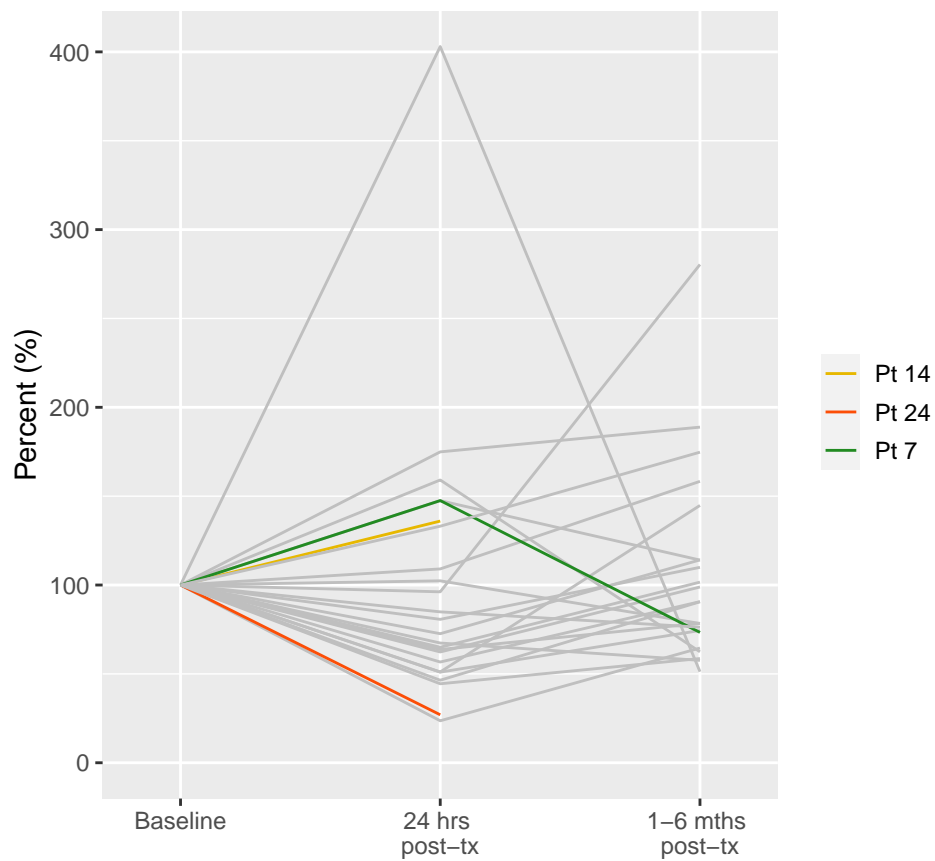

# Uniprot ID: O95971, analyte: CD160

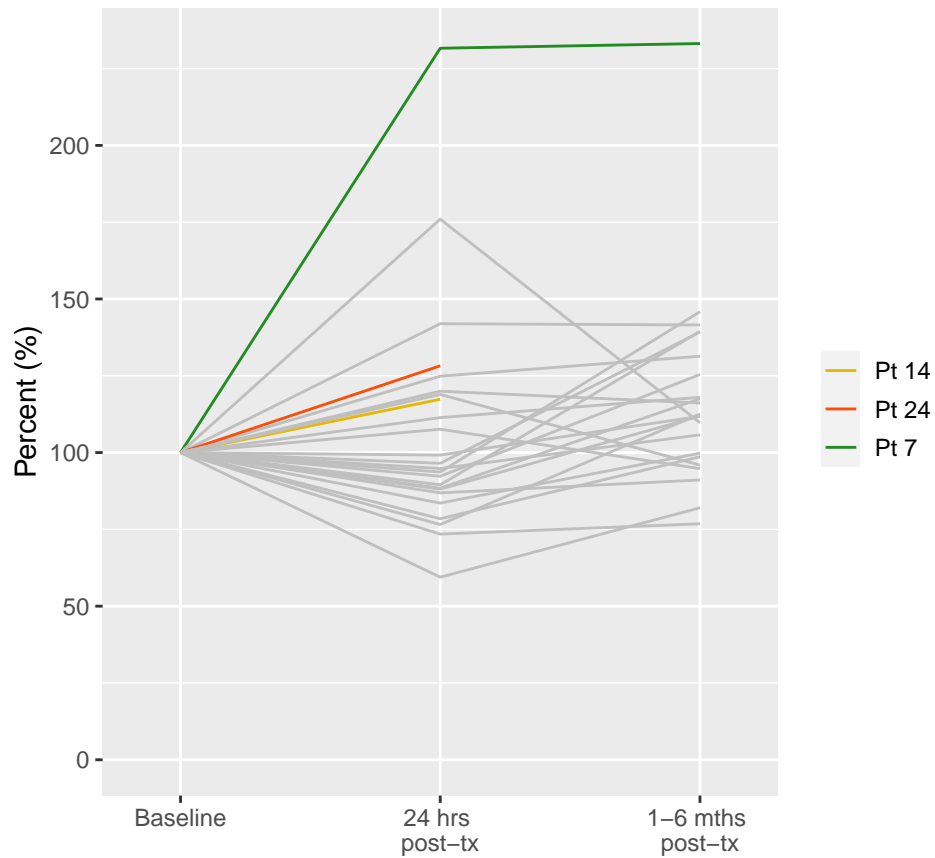

# Uniprot ID: P43489, analyte: TNFRSF4

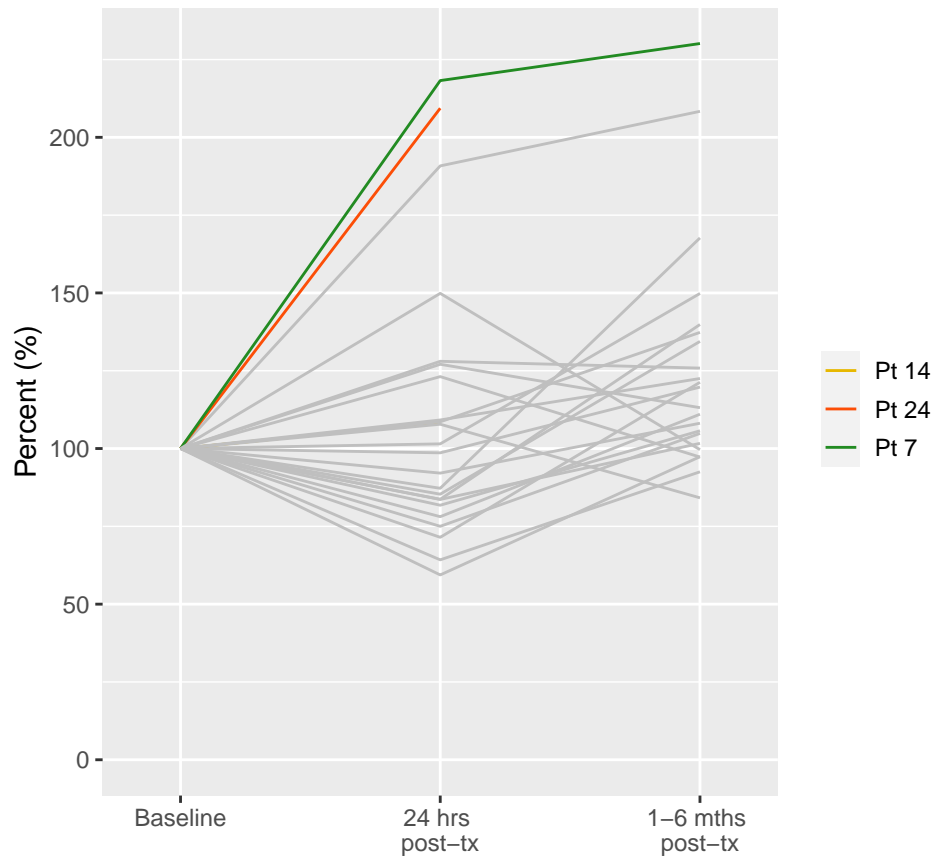

# Uniprot ID: Q29983.Q29980, analyte: MIC-A/B

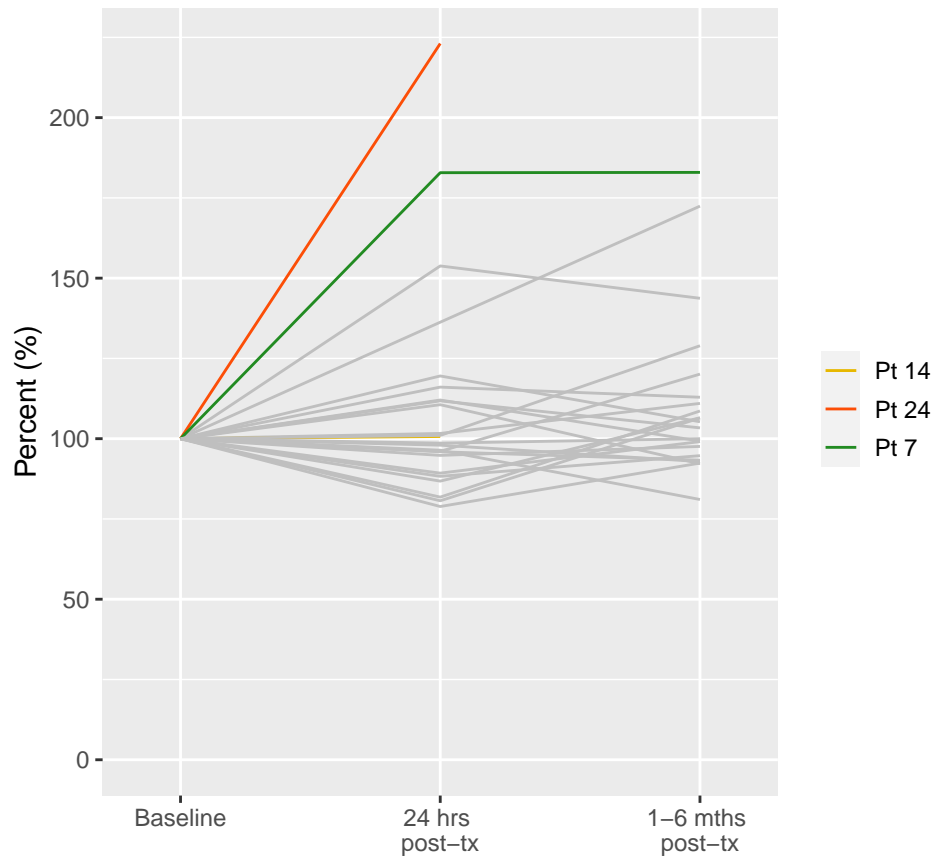

# Uniprot ID: O95388, analyte: WISP-1

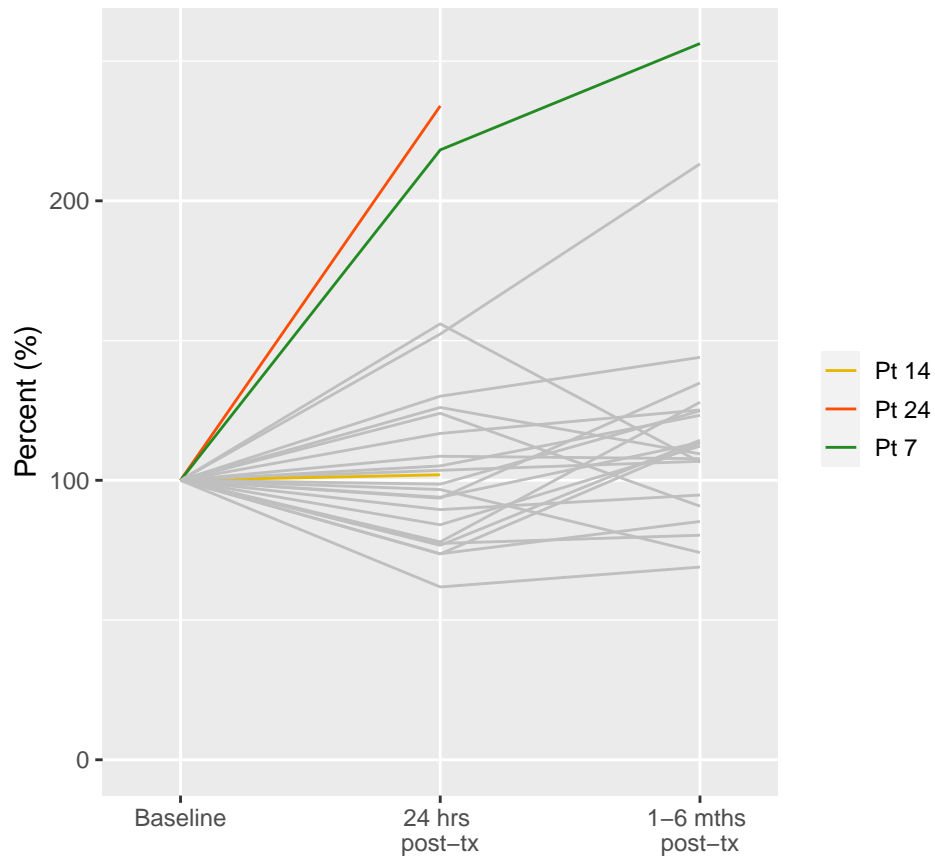

# Uniprot ID: Q6UXB2, analyte: CXL17

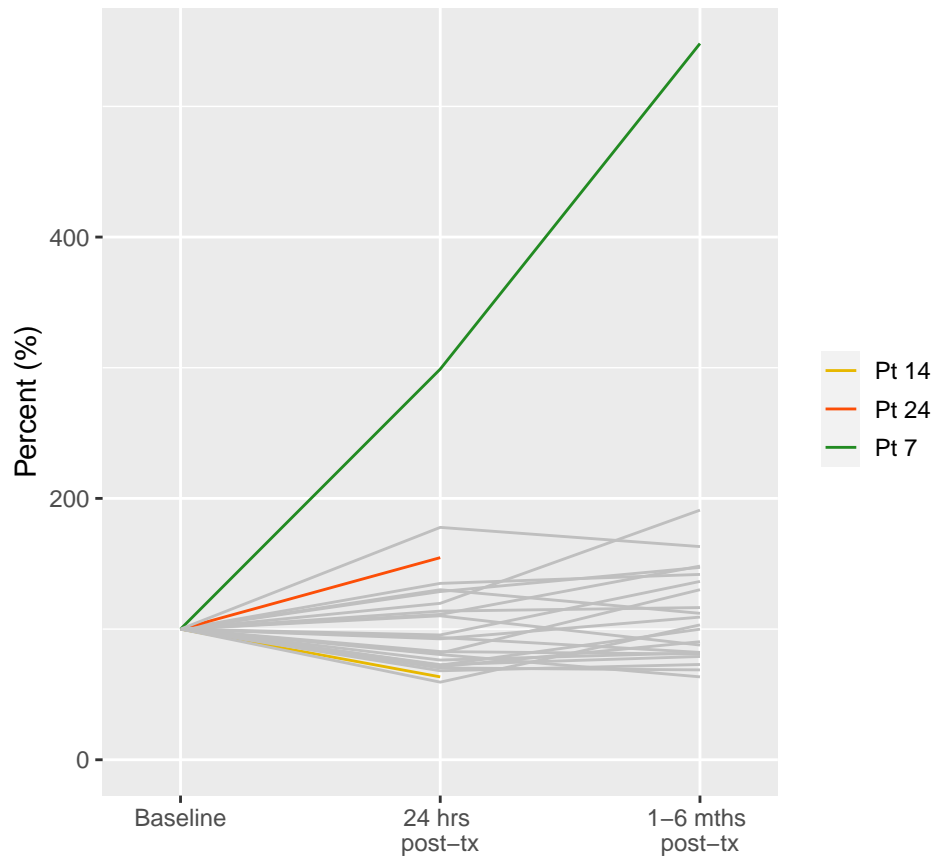



# Uniprot ID: P01298, analyte: PPY

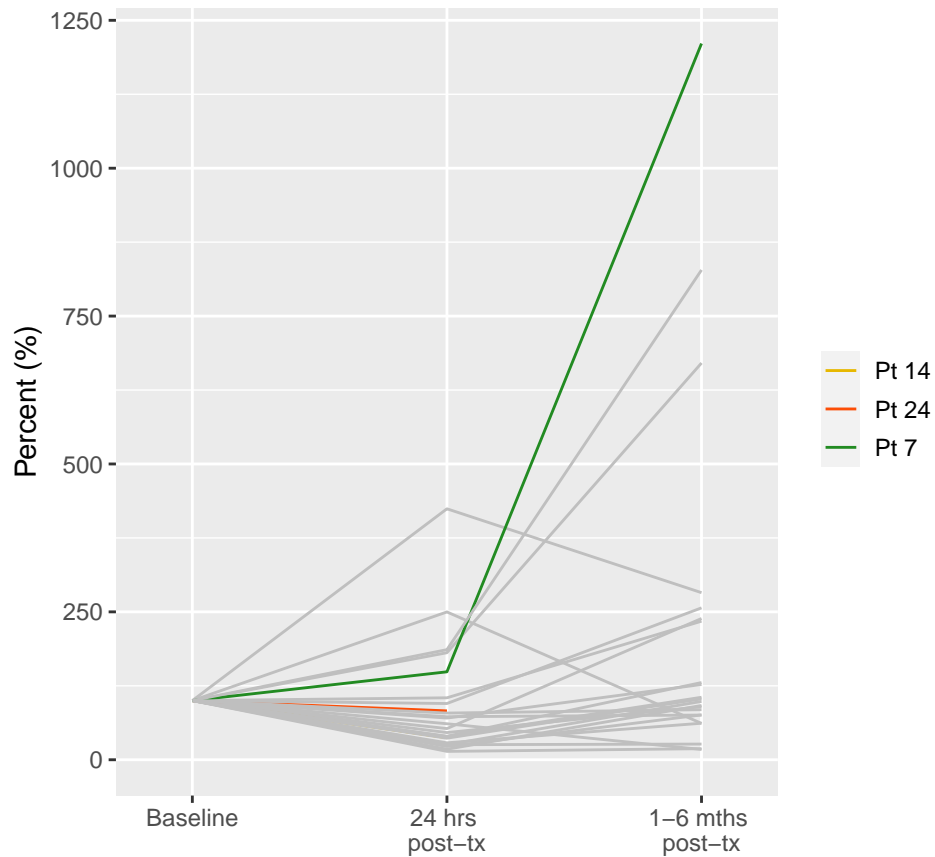

# Uniprot ID: P31949, analyte: S100A11

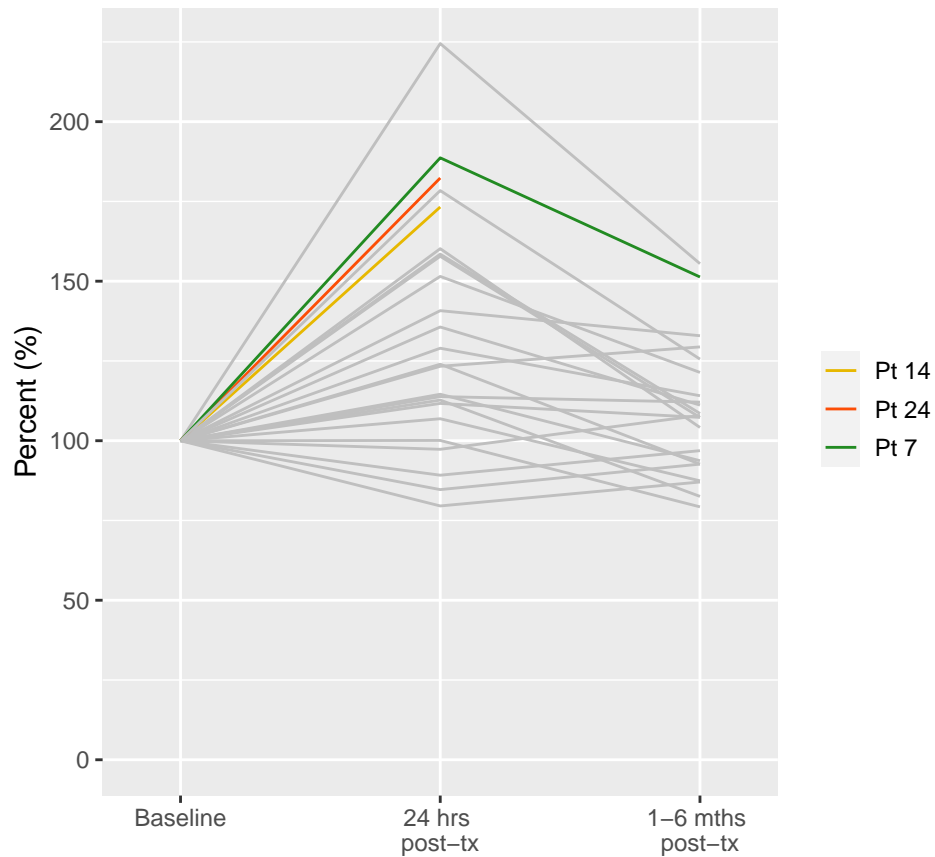

# Uniprot ID: P15514, analyte: AREG

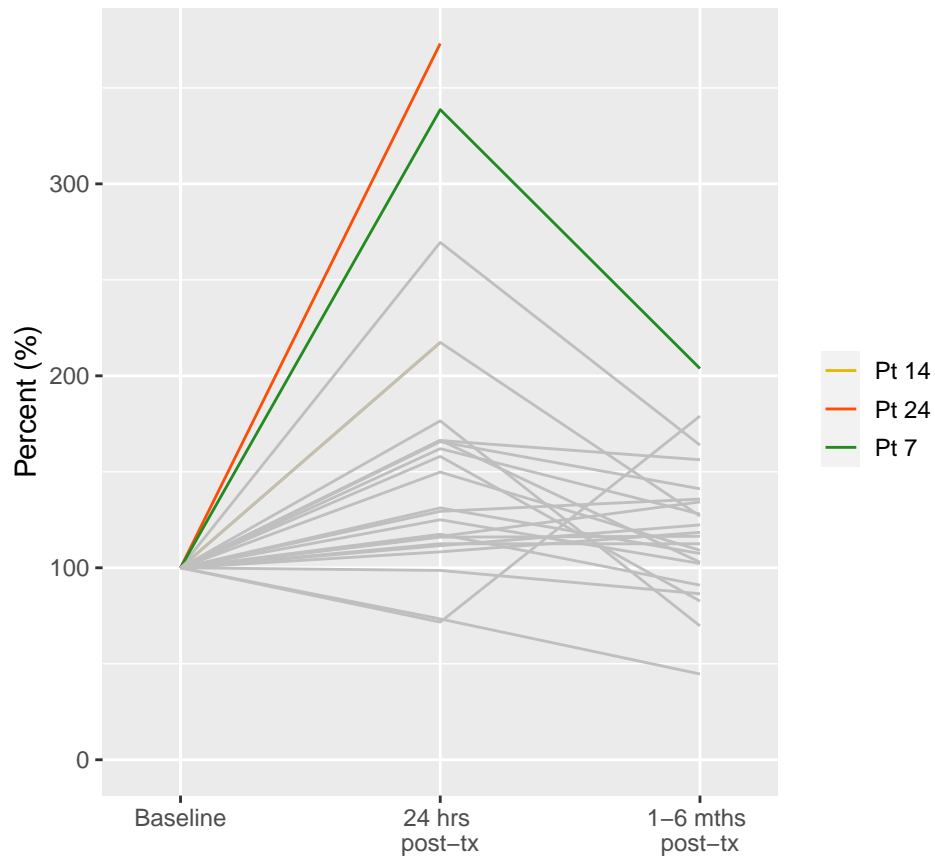

# Uniprot ID: Q9NQ30, analyte: ESM-1

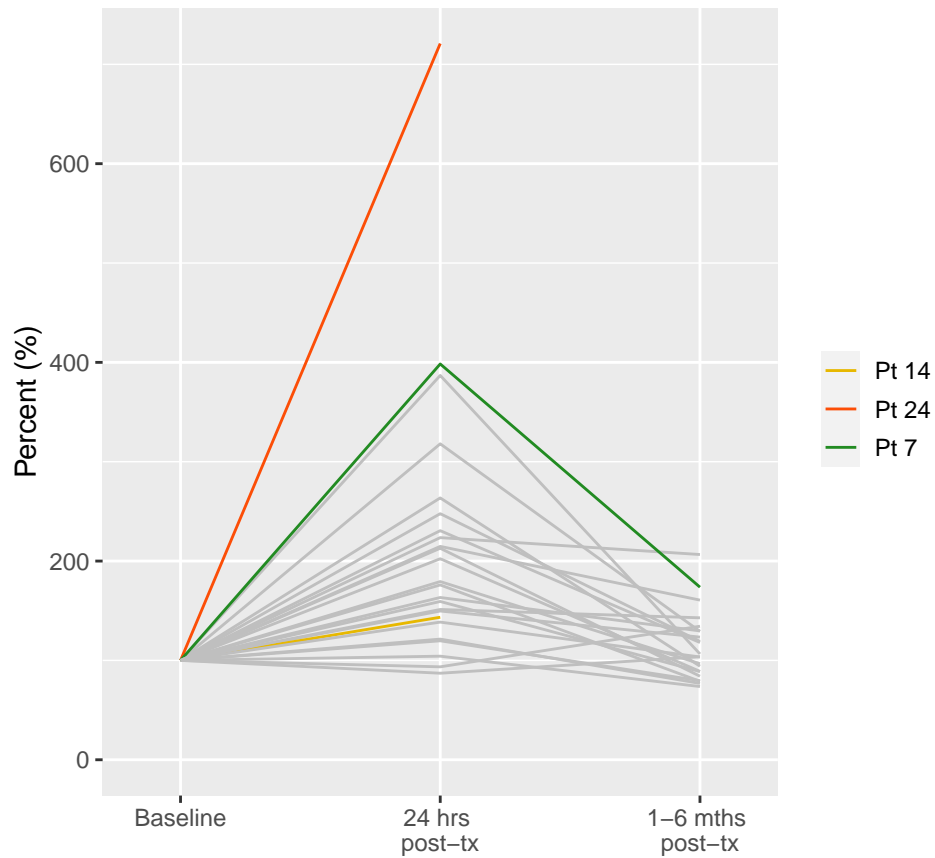

# Uniprot ID: Q9UJ71, analyte: CD207

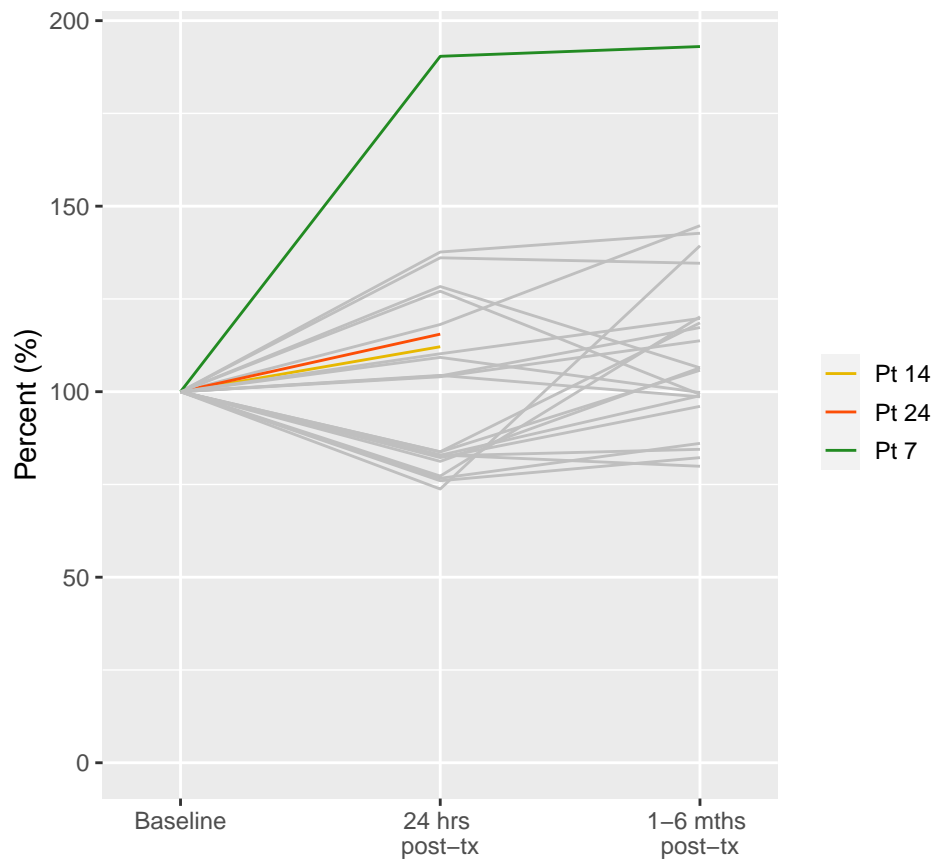

# Uniprot ID: O75144, analyte: ICOSLG

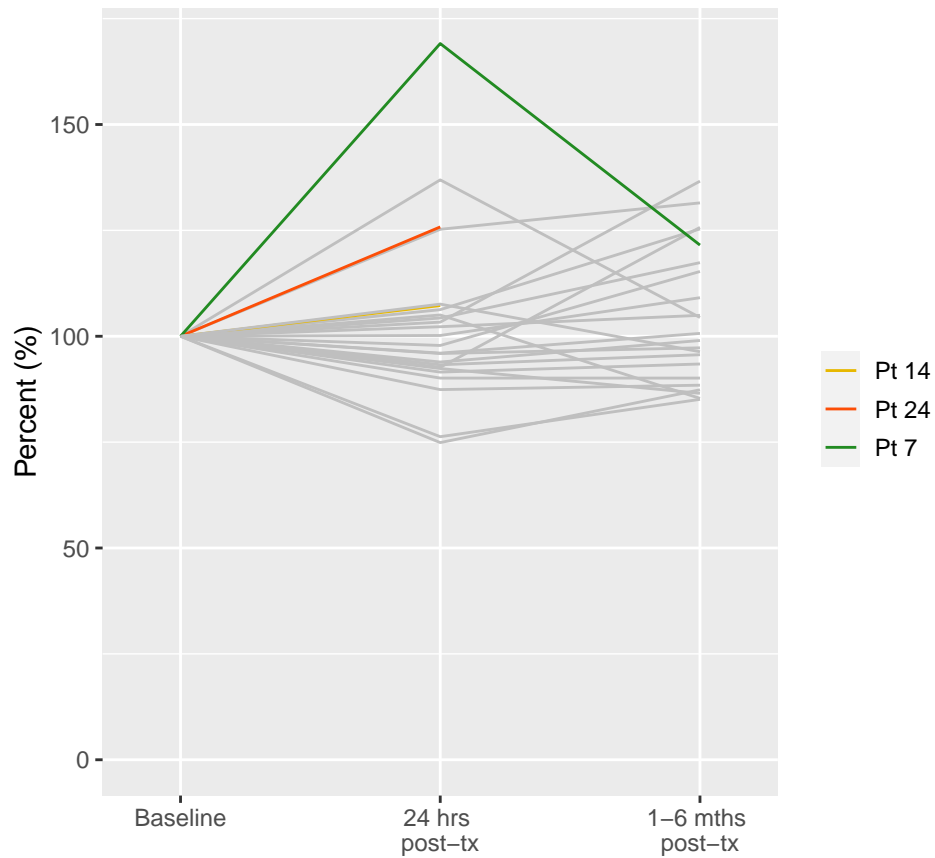

# Uniprot ID: Q14508, analyte: WFDC2

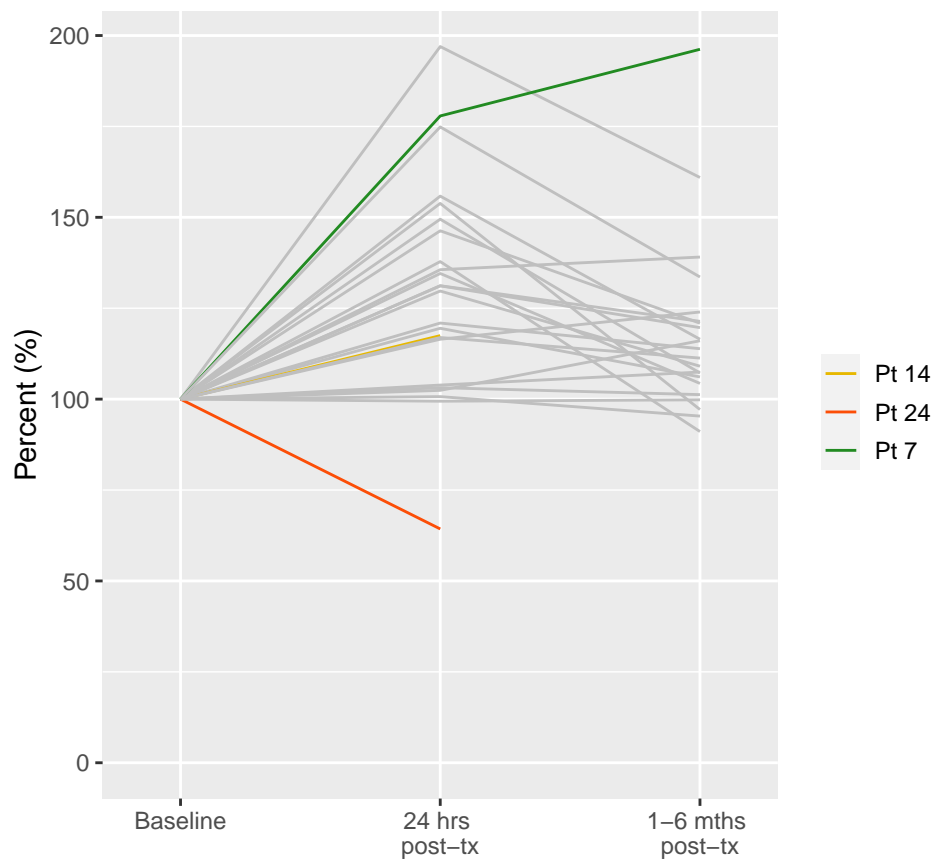

# Uniprot ID: O43927, analyte: CXCL13

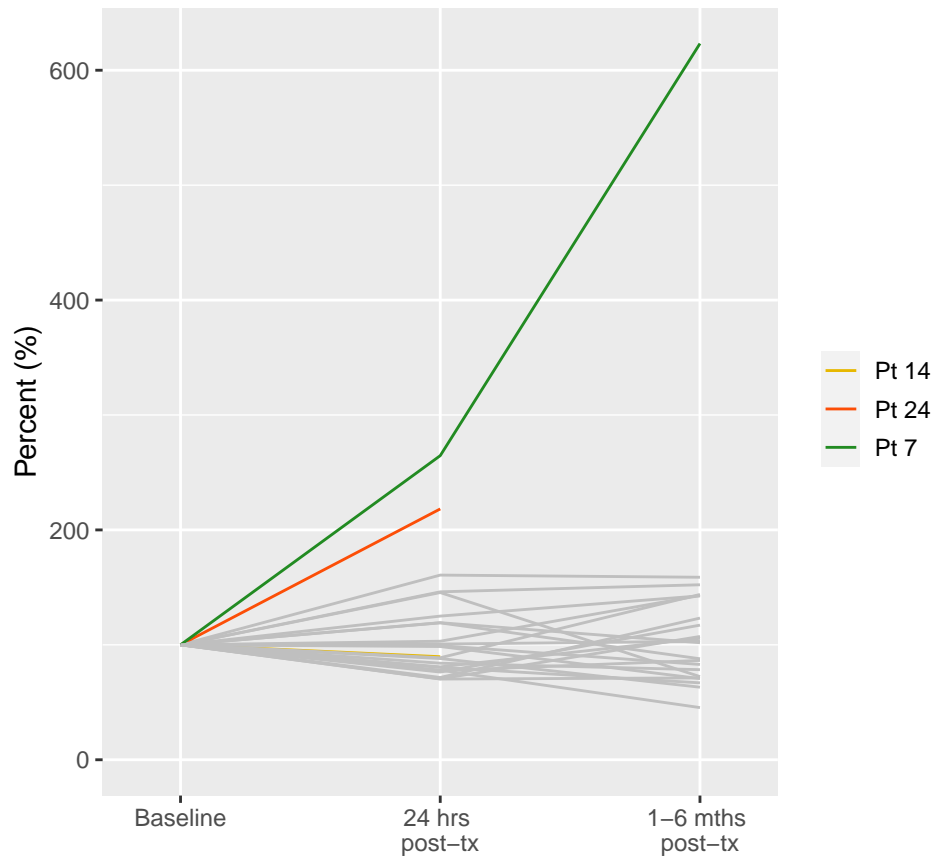



# Uniprot ID: Q99717, analyte: MAD homolog 5

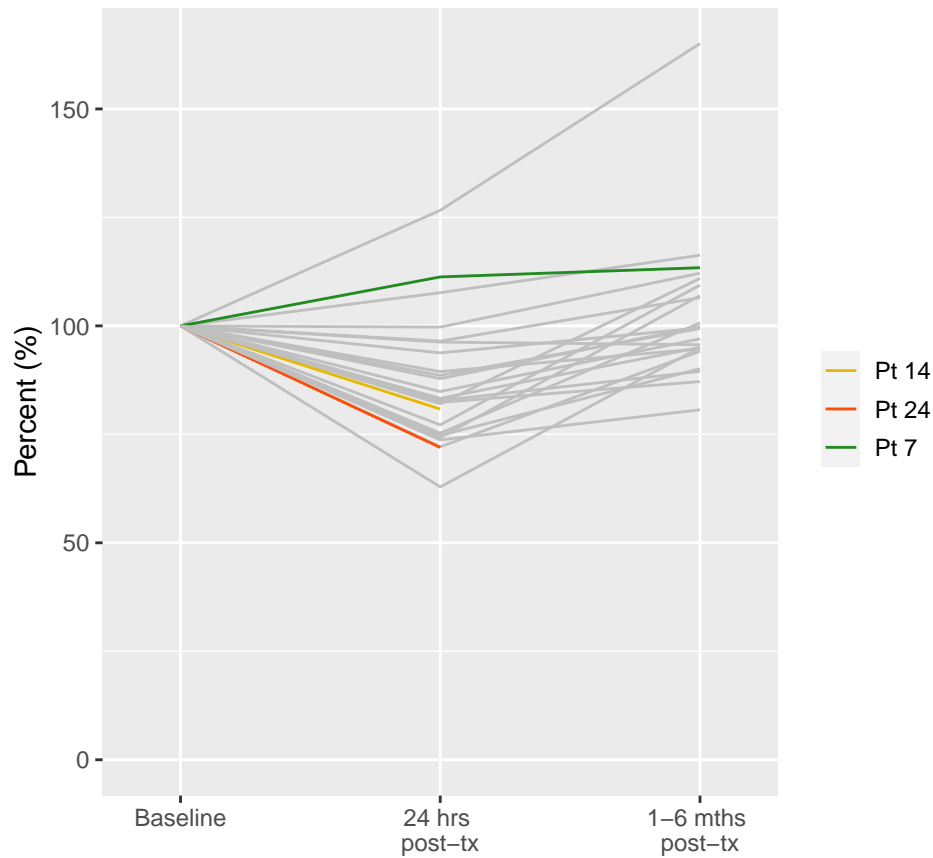

# Uniprot ID: Q8TE58, analyte: ADAM-TS 15

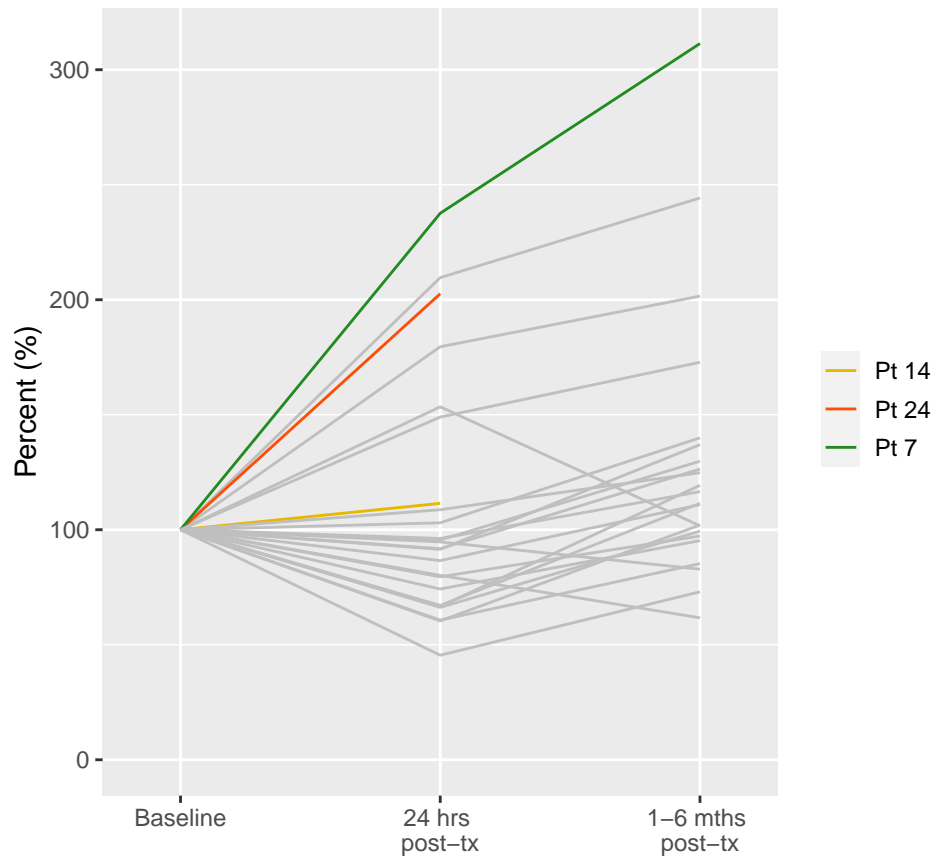

# Uniprot ID: P32970, analyte: CD70

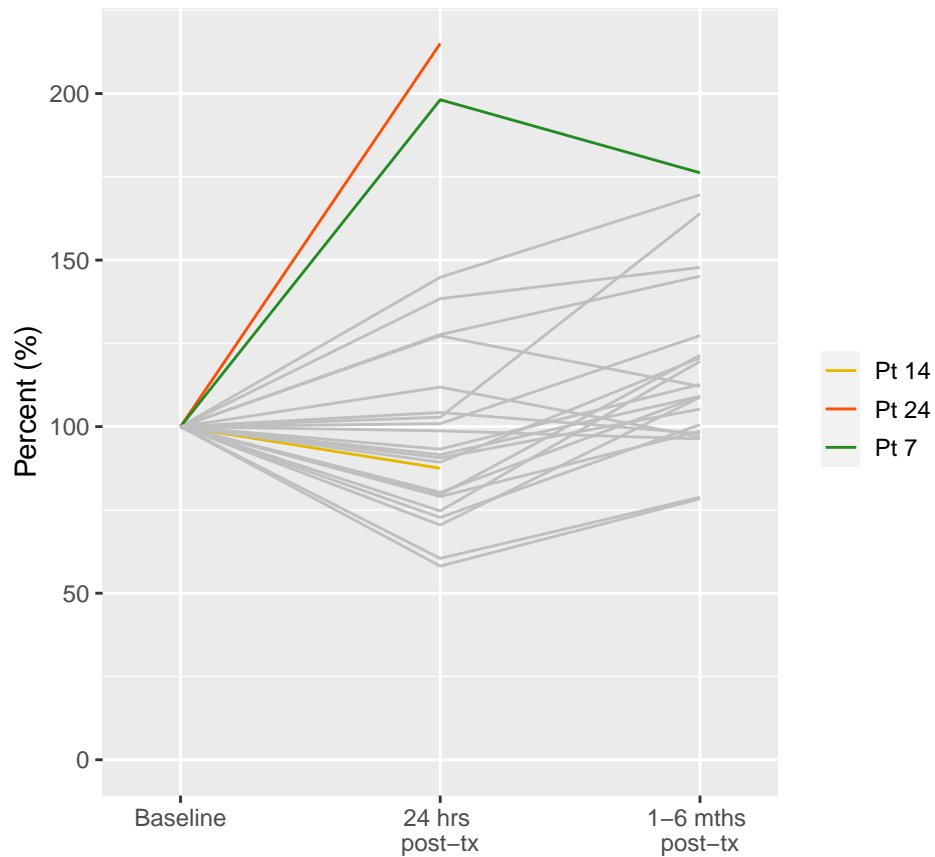

# Uniprot ID: Q9BXY4, analyte: RSPO3

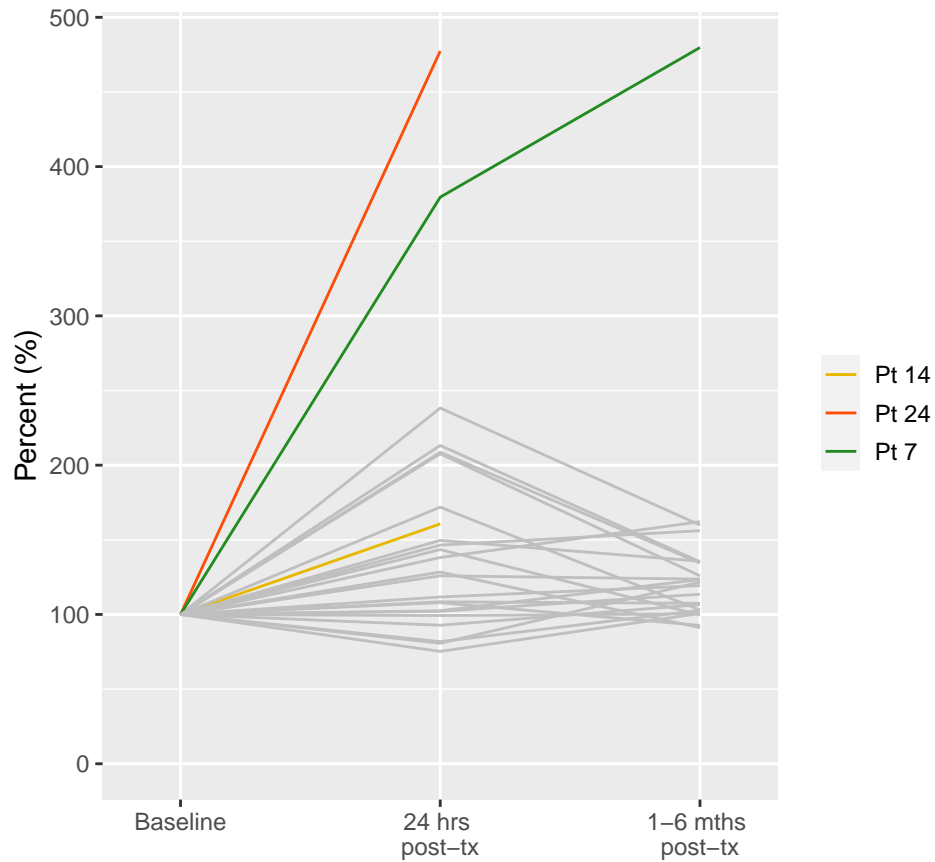

# Uniprot ID: P41439, analyte: FR-gamma

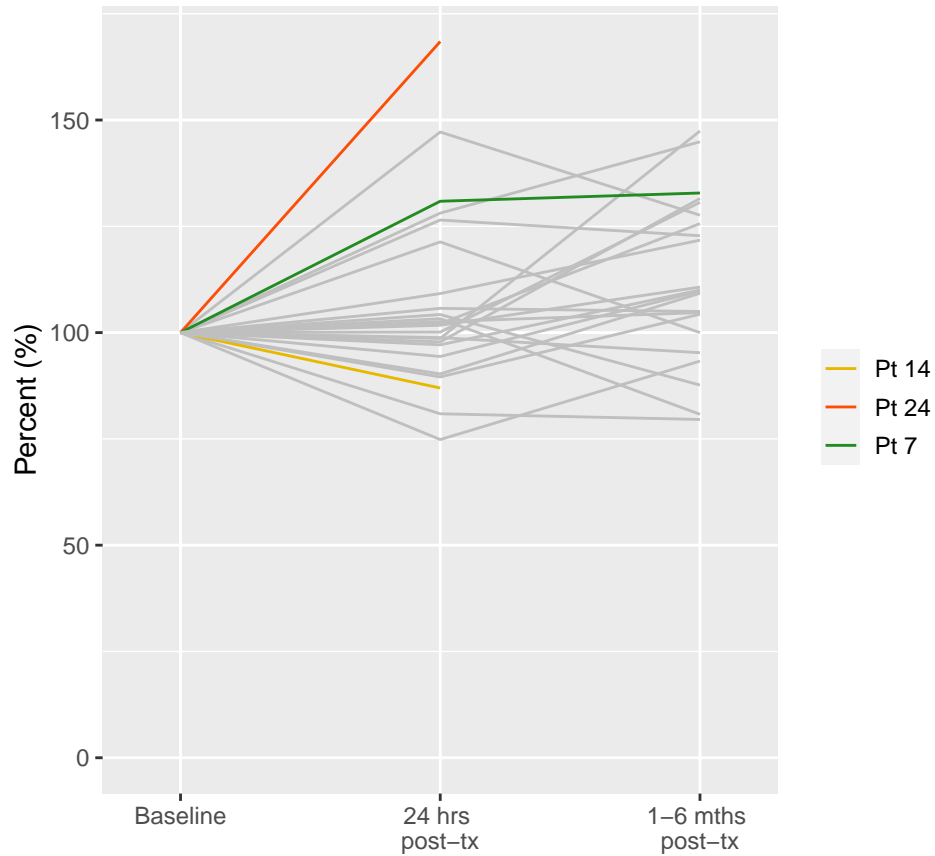

# Uniprot ID: P06731, analyte: CEACAM5

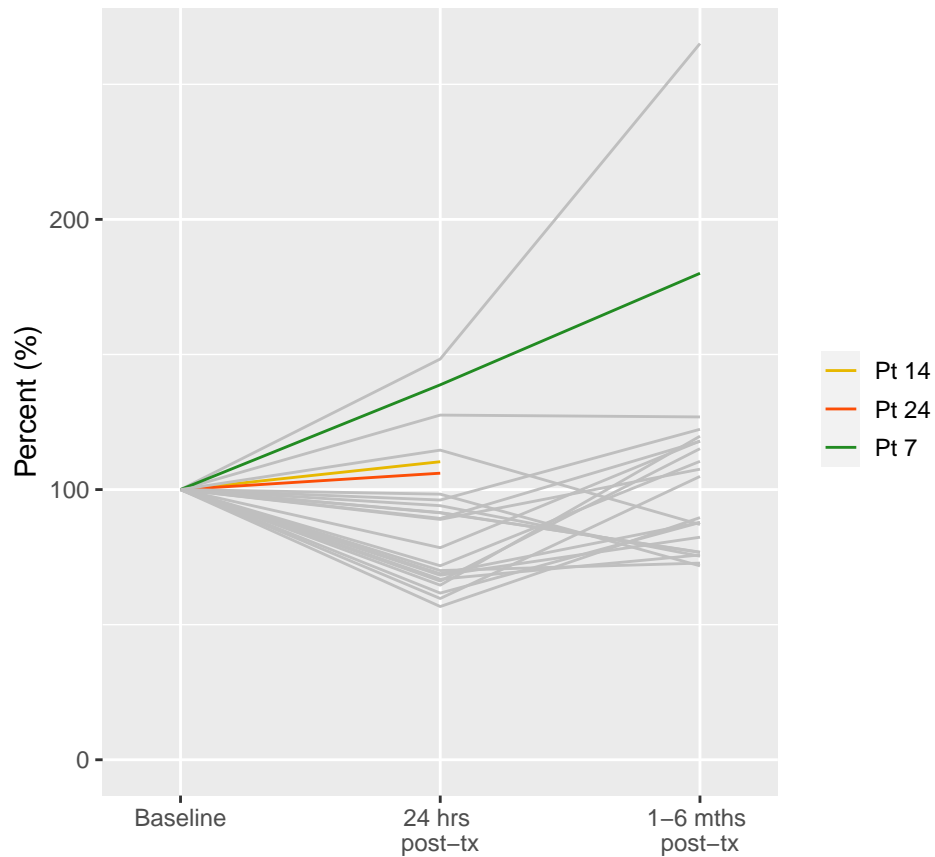

# Uniprot ID: P35916, analyte: VEGFR-3

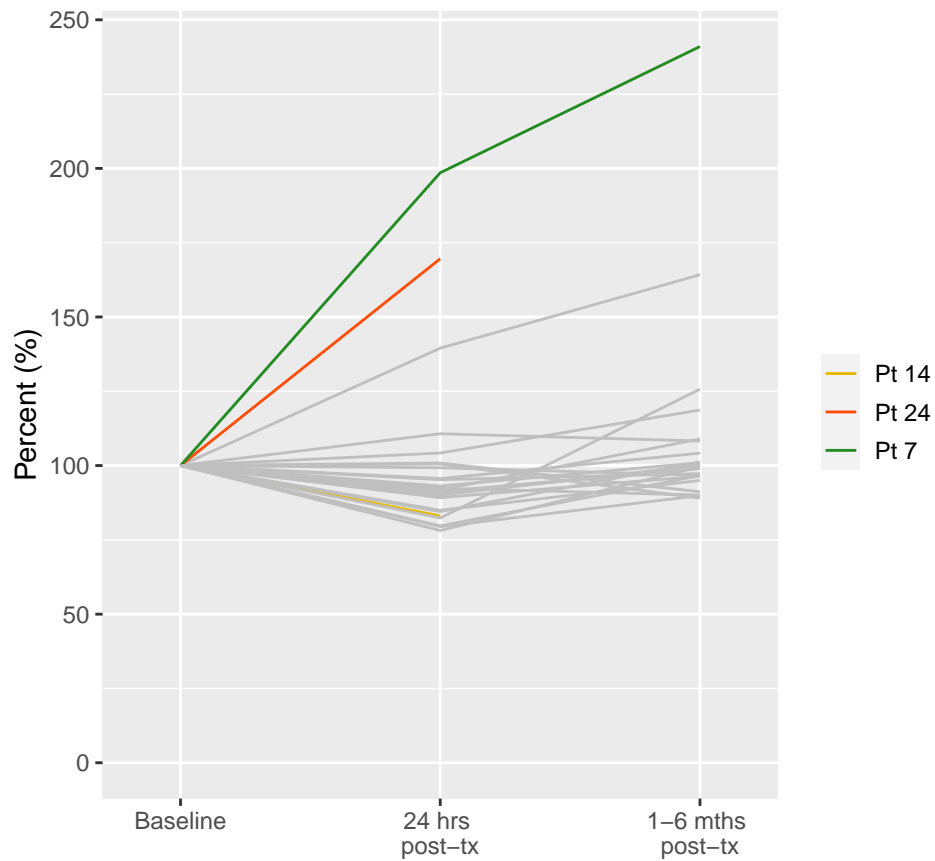

# Uniprot ID: Q8WXI7, analyte: MUC-16

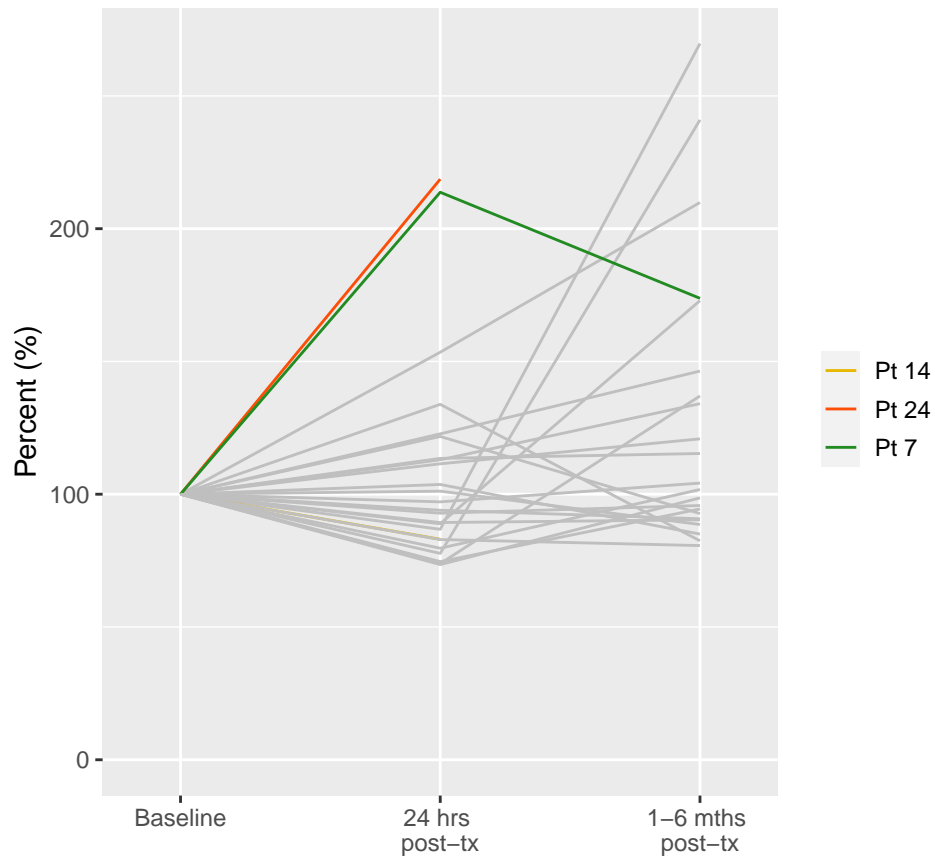



# Uniprot ID: Q9Y5W5, analyte: WIF-1

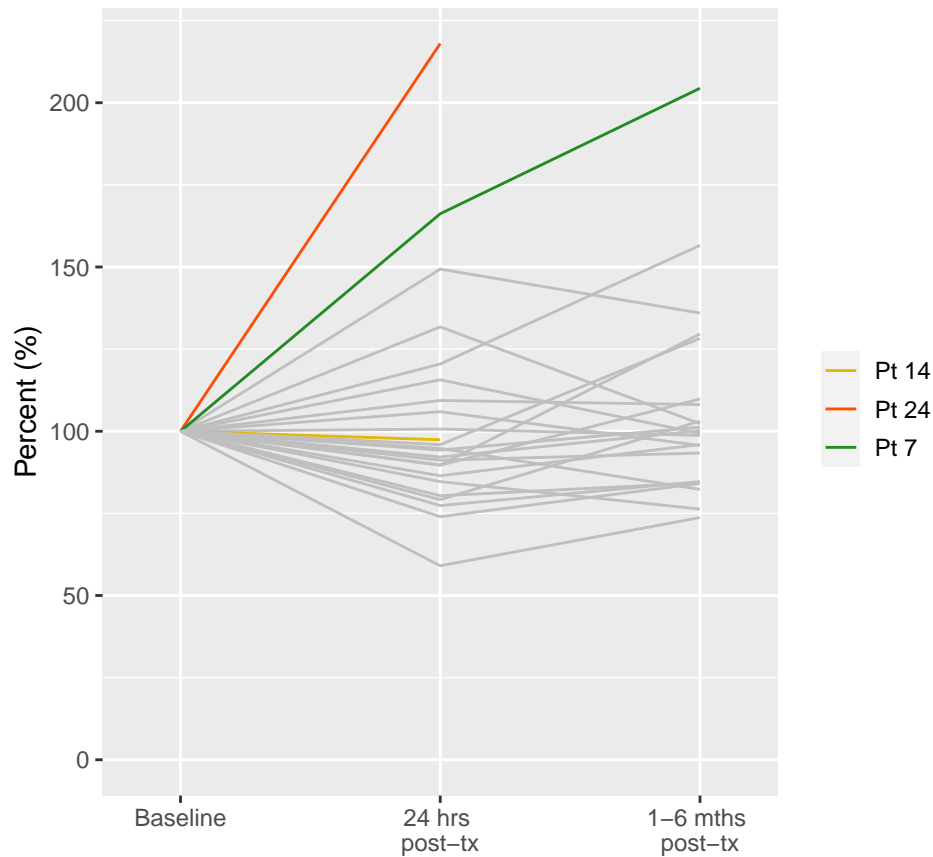

# Uniprot ID: P10144, analyte: GZMB

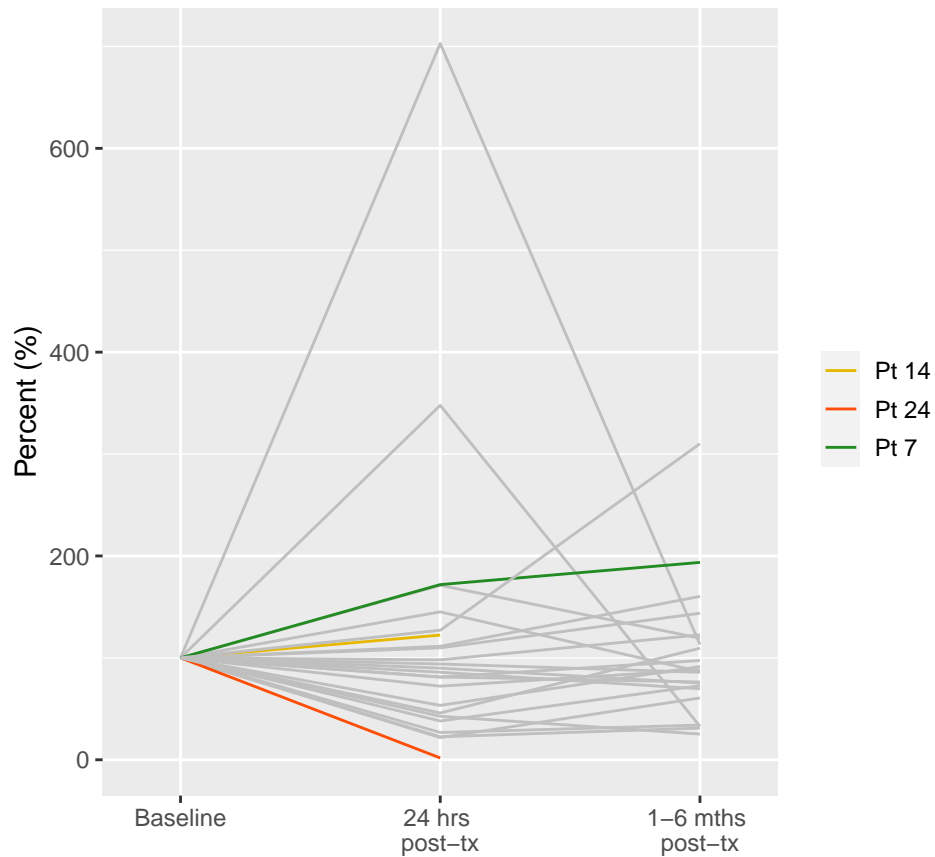

# Uniprot ID: Q6BAA4, analyte: FCRLB

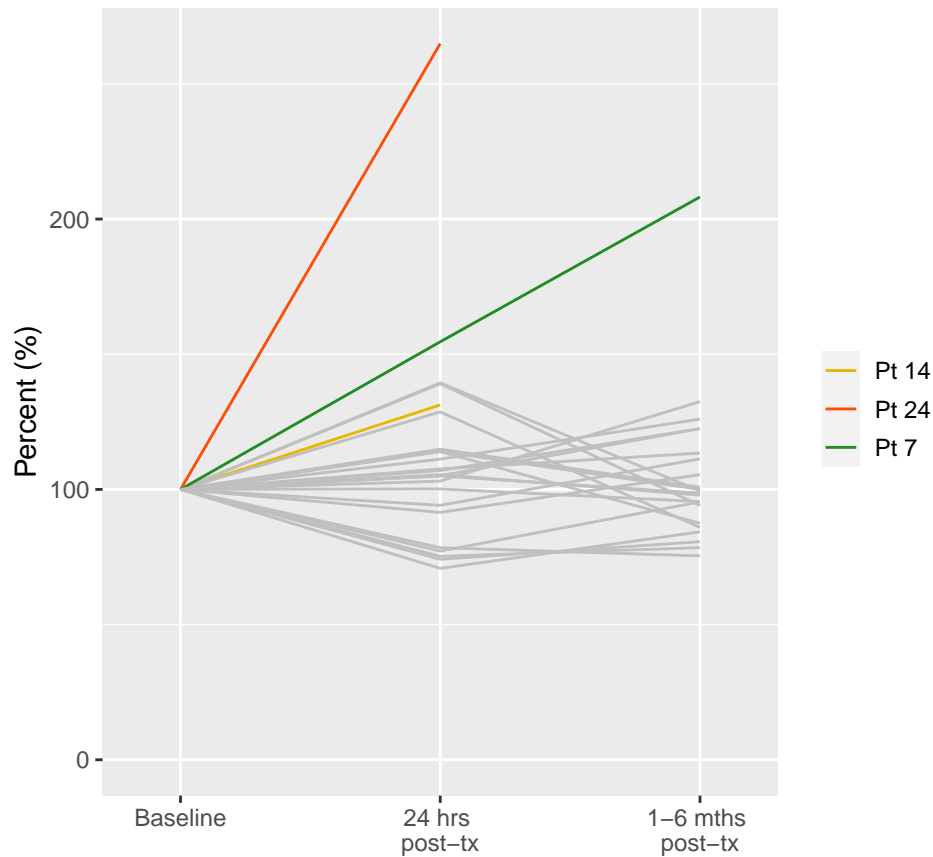

# Uniprot ID: P04083, analyte: ANXA1

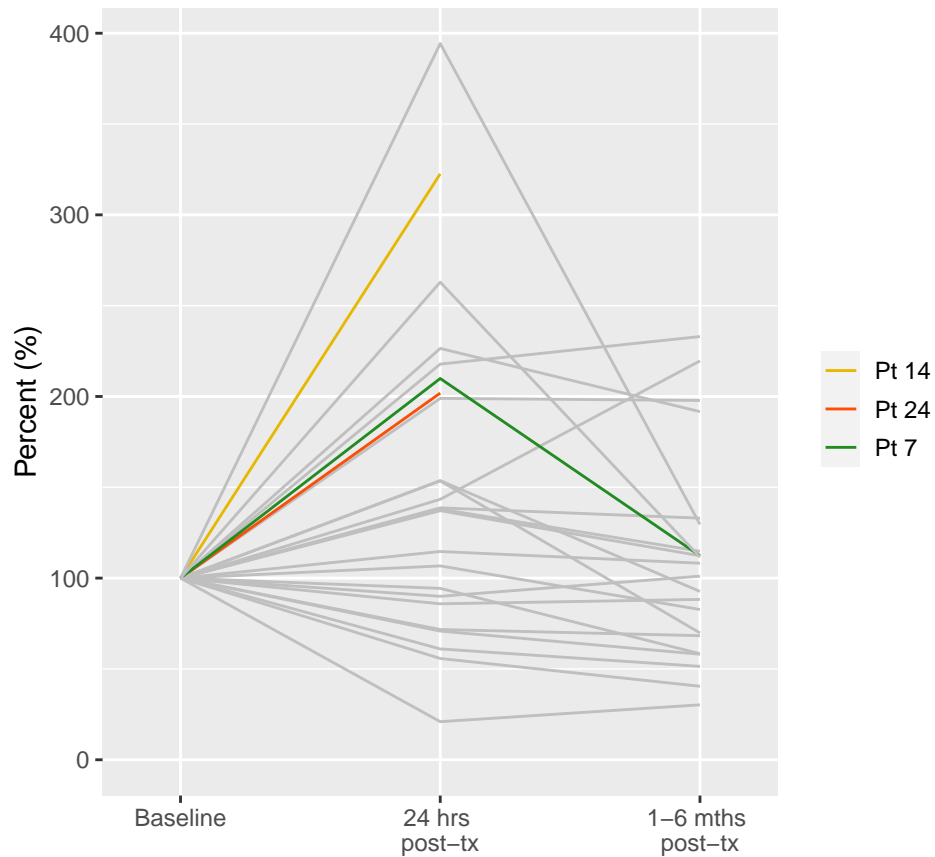

# Uniprot ID: P15328, analyte: FR-alpha

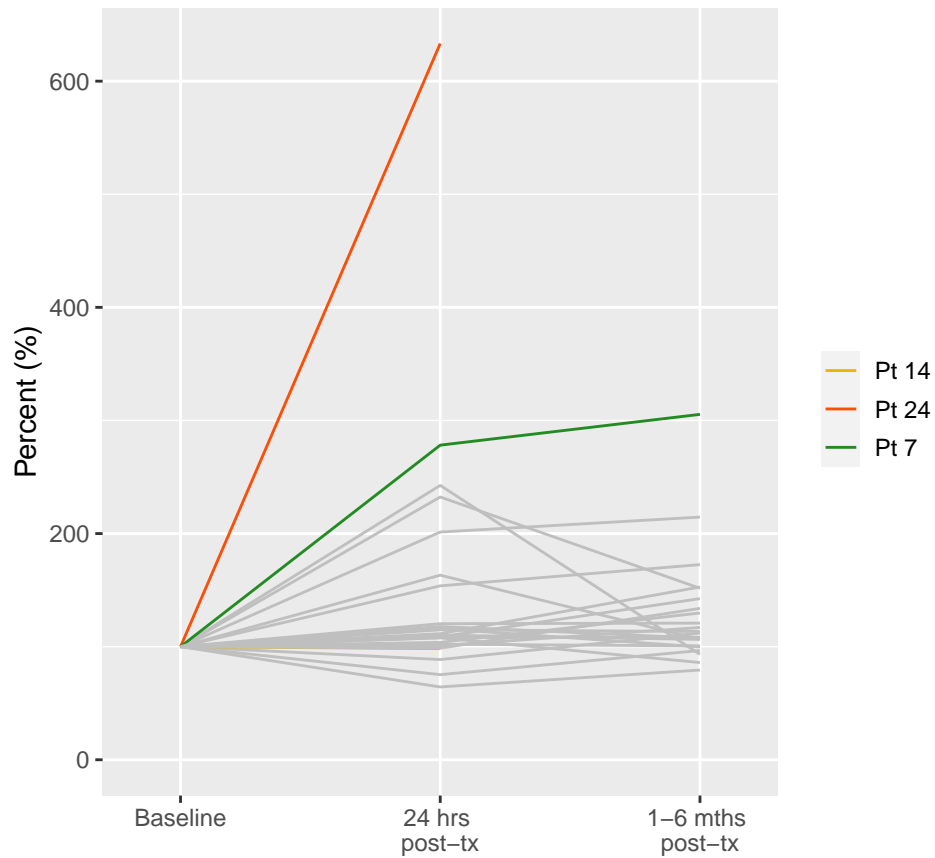

Supplement: s1 [file s1]
