# Supplementary material for: An Exploratory Analysis of Changes in Circulating Plasma Protein Profiles Following Image-Guided Ablation of Renal Tumours Provides Evidence for Effects on Multiple Biological Processes
Source: MDPI journal article supplement (doi:10.3390/cancers13236037), 2021-11-30

**Figure S2.** Longitudinal profiles of all plasma proteins on the Oncology panel, prior to and post-ablation. Results for each protein are shown as linear NPX values and are shown for patients receiving CRYO (n=25), MWA (n=2) and RFA (n=8) and as a single timepoint for healthy controls (n=11). Dotted line indicates lower limit of quantification

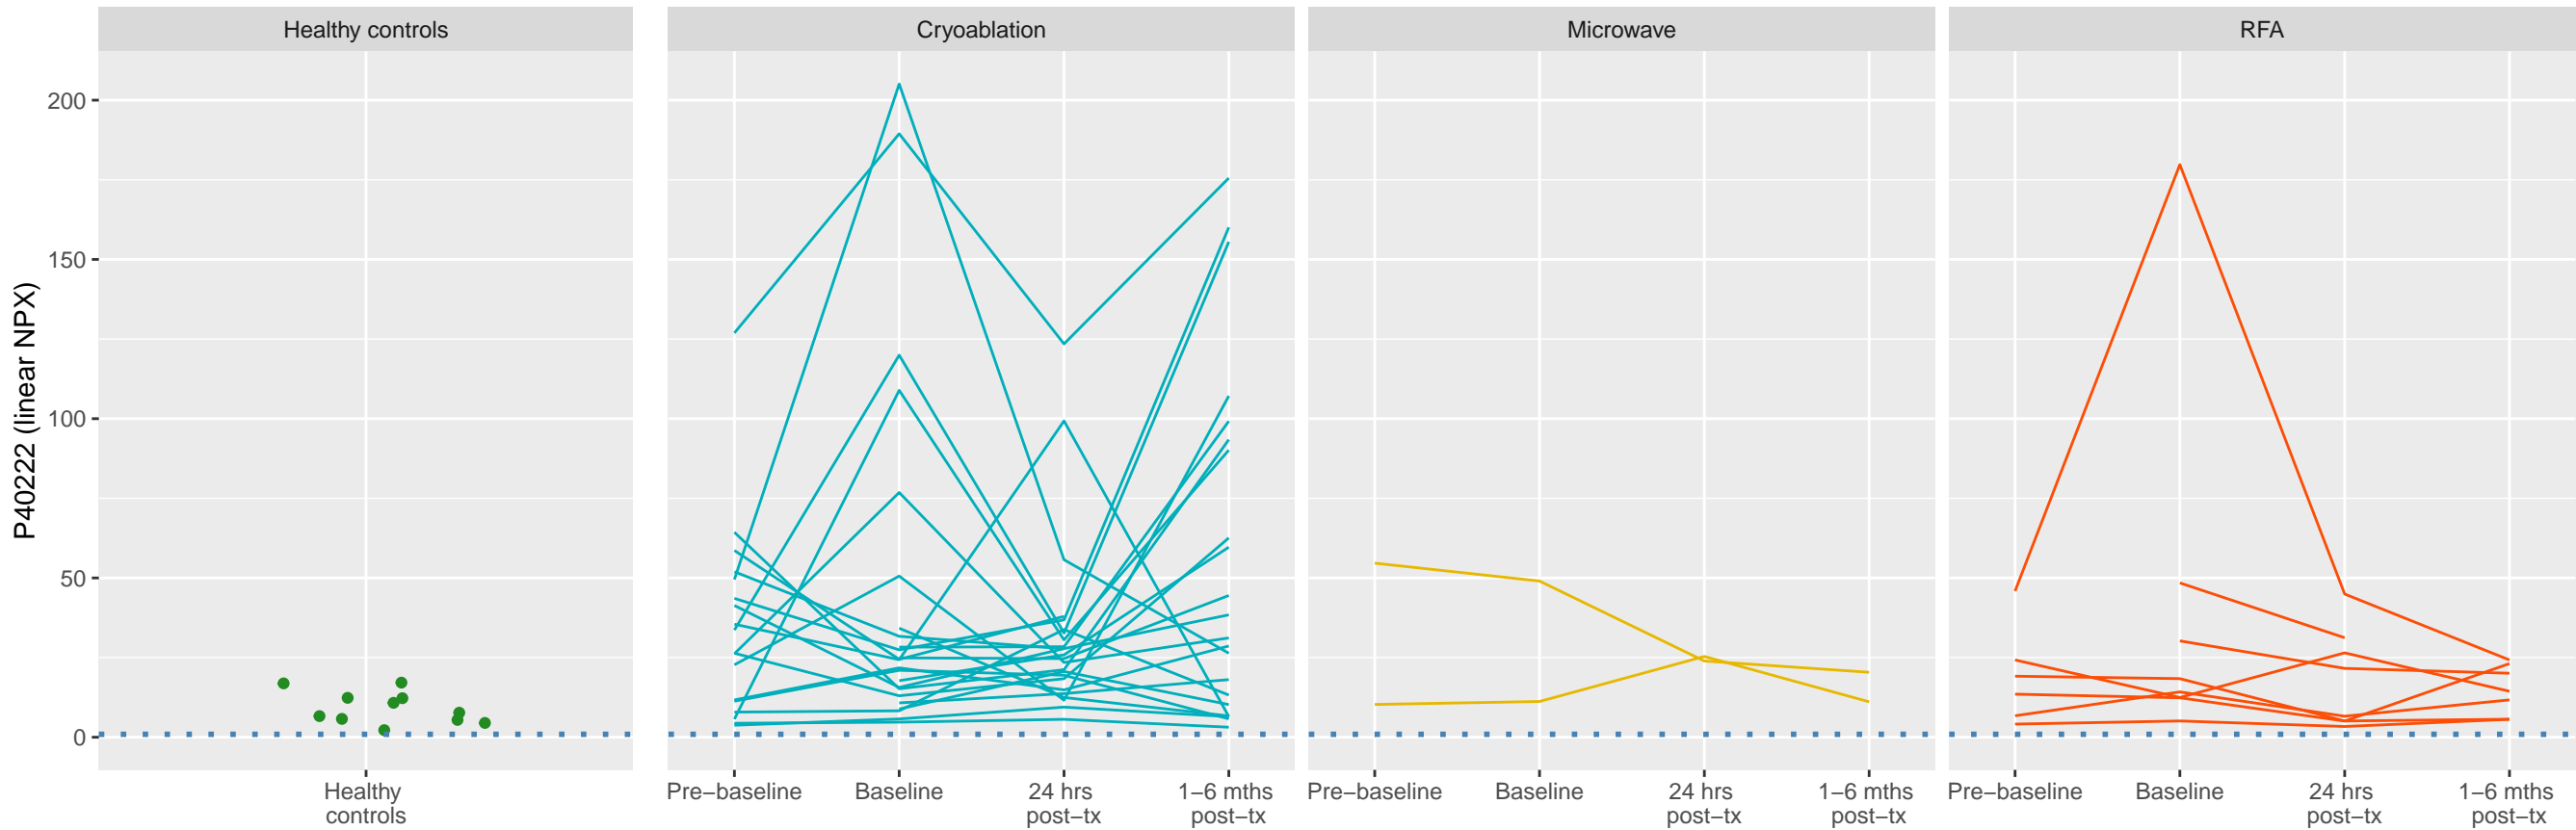

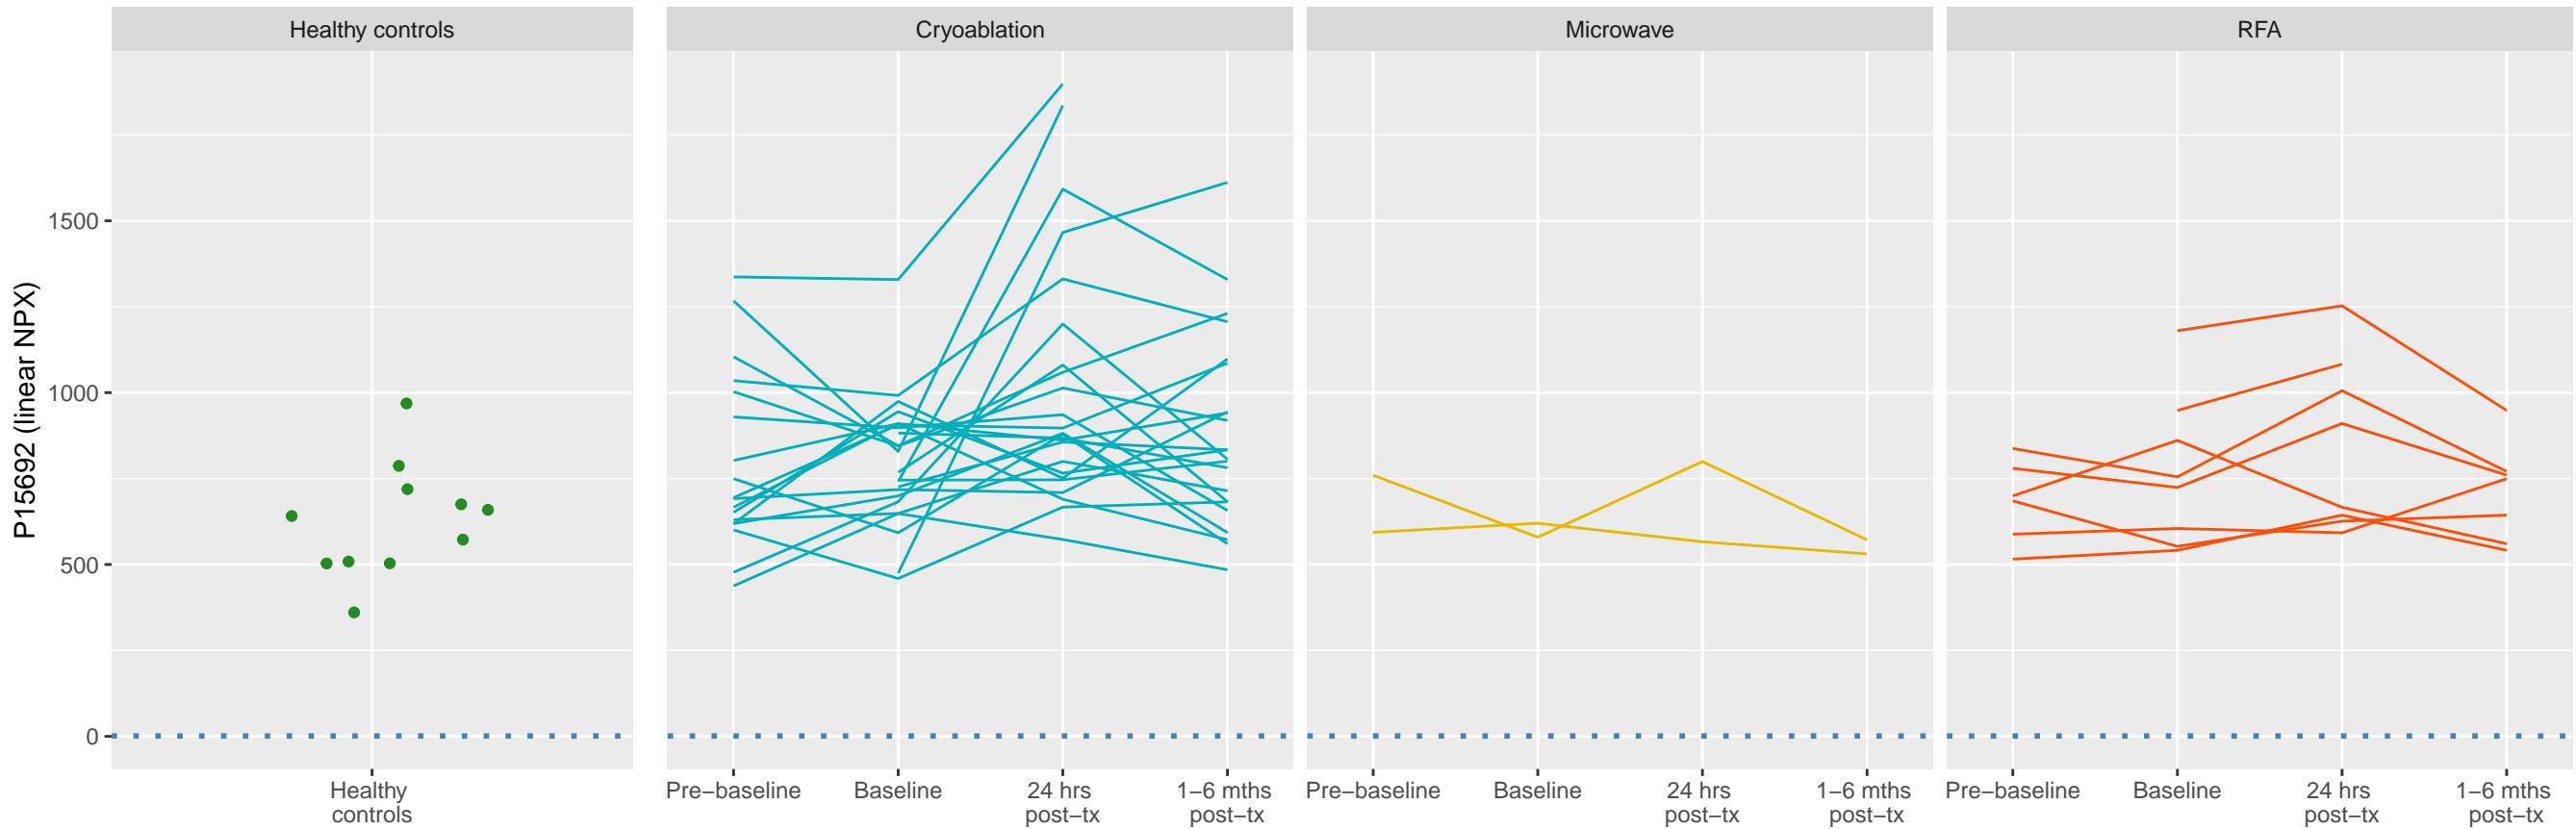

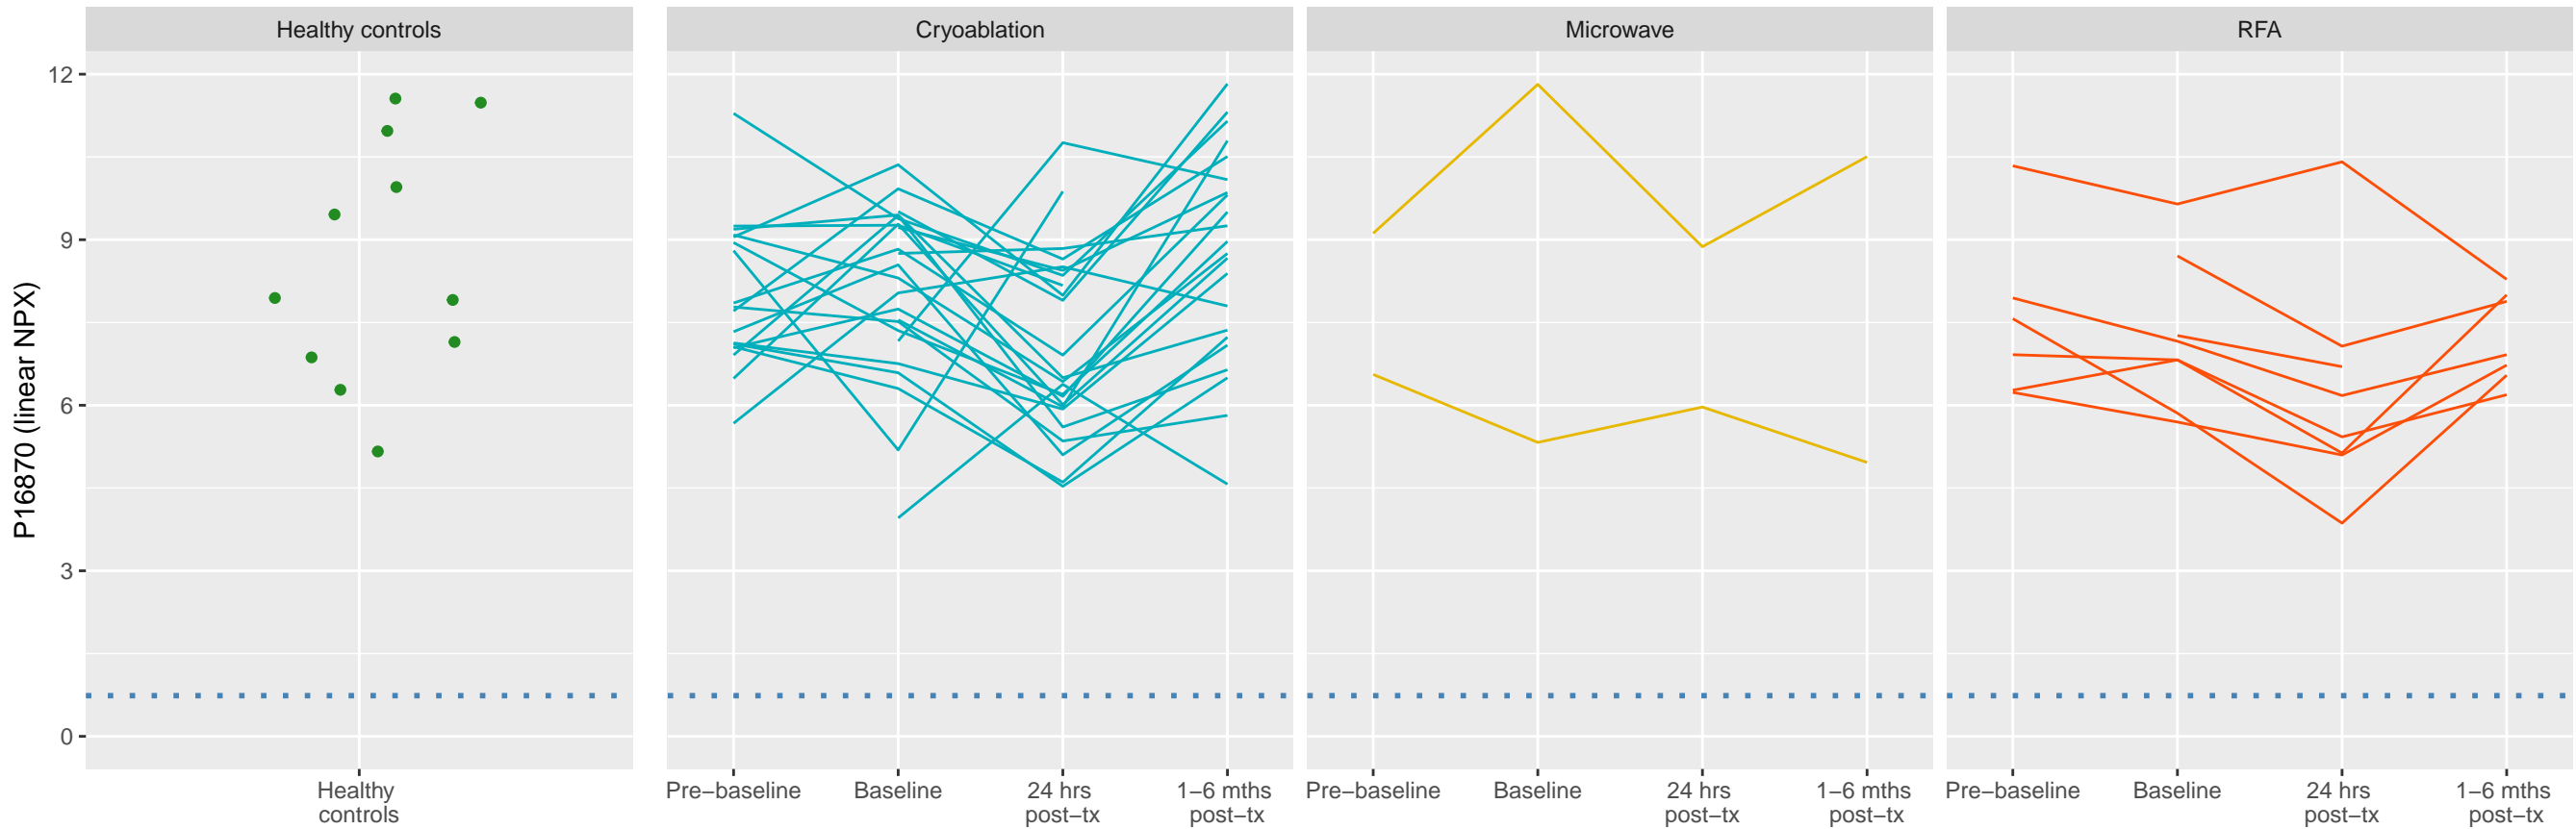

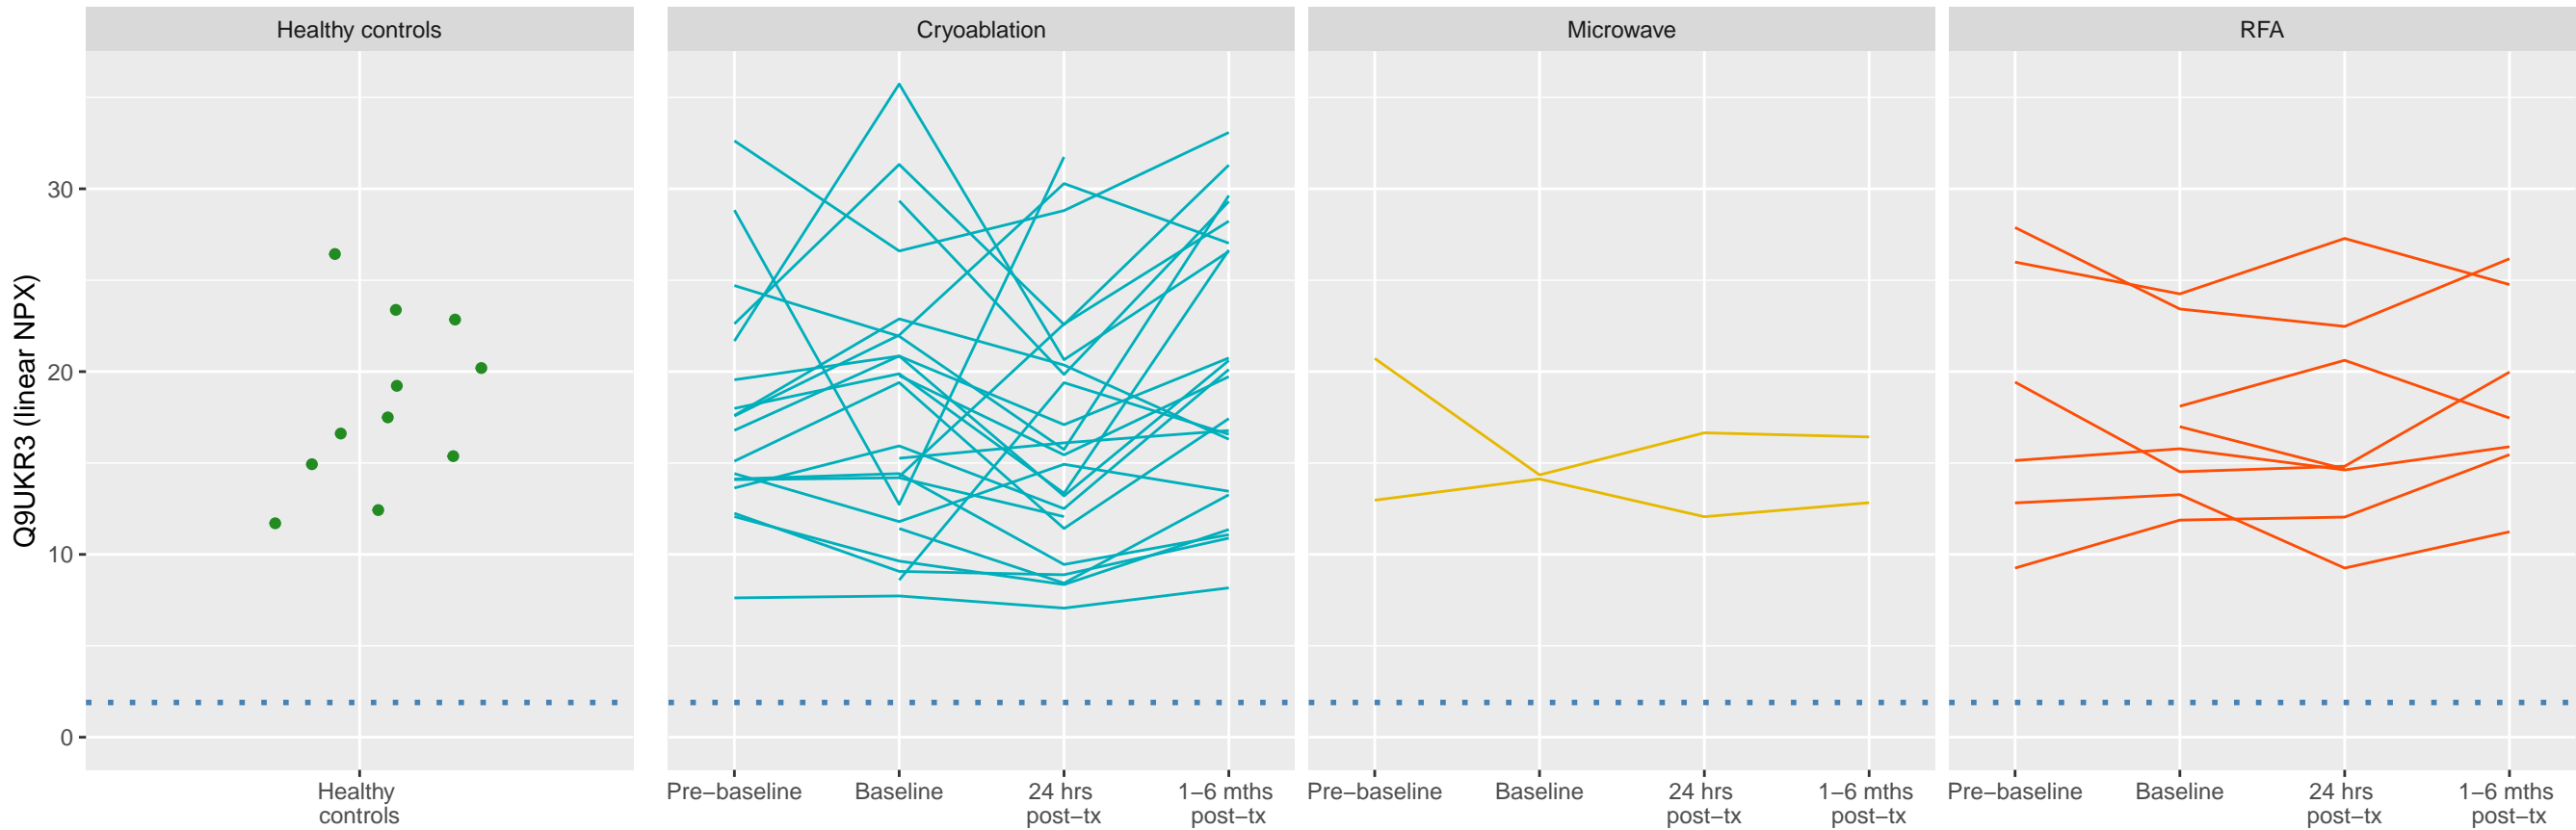

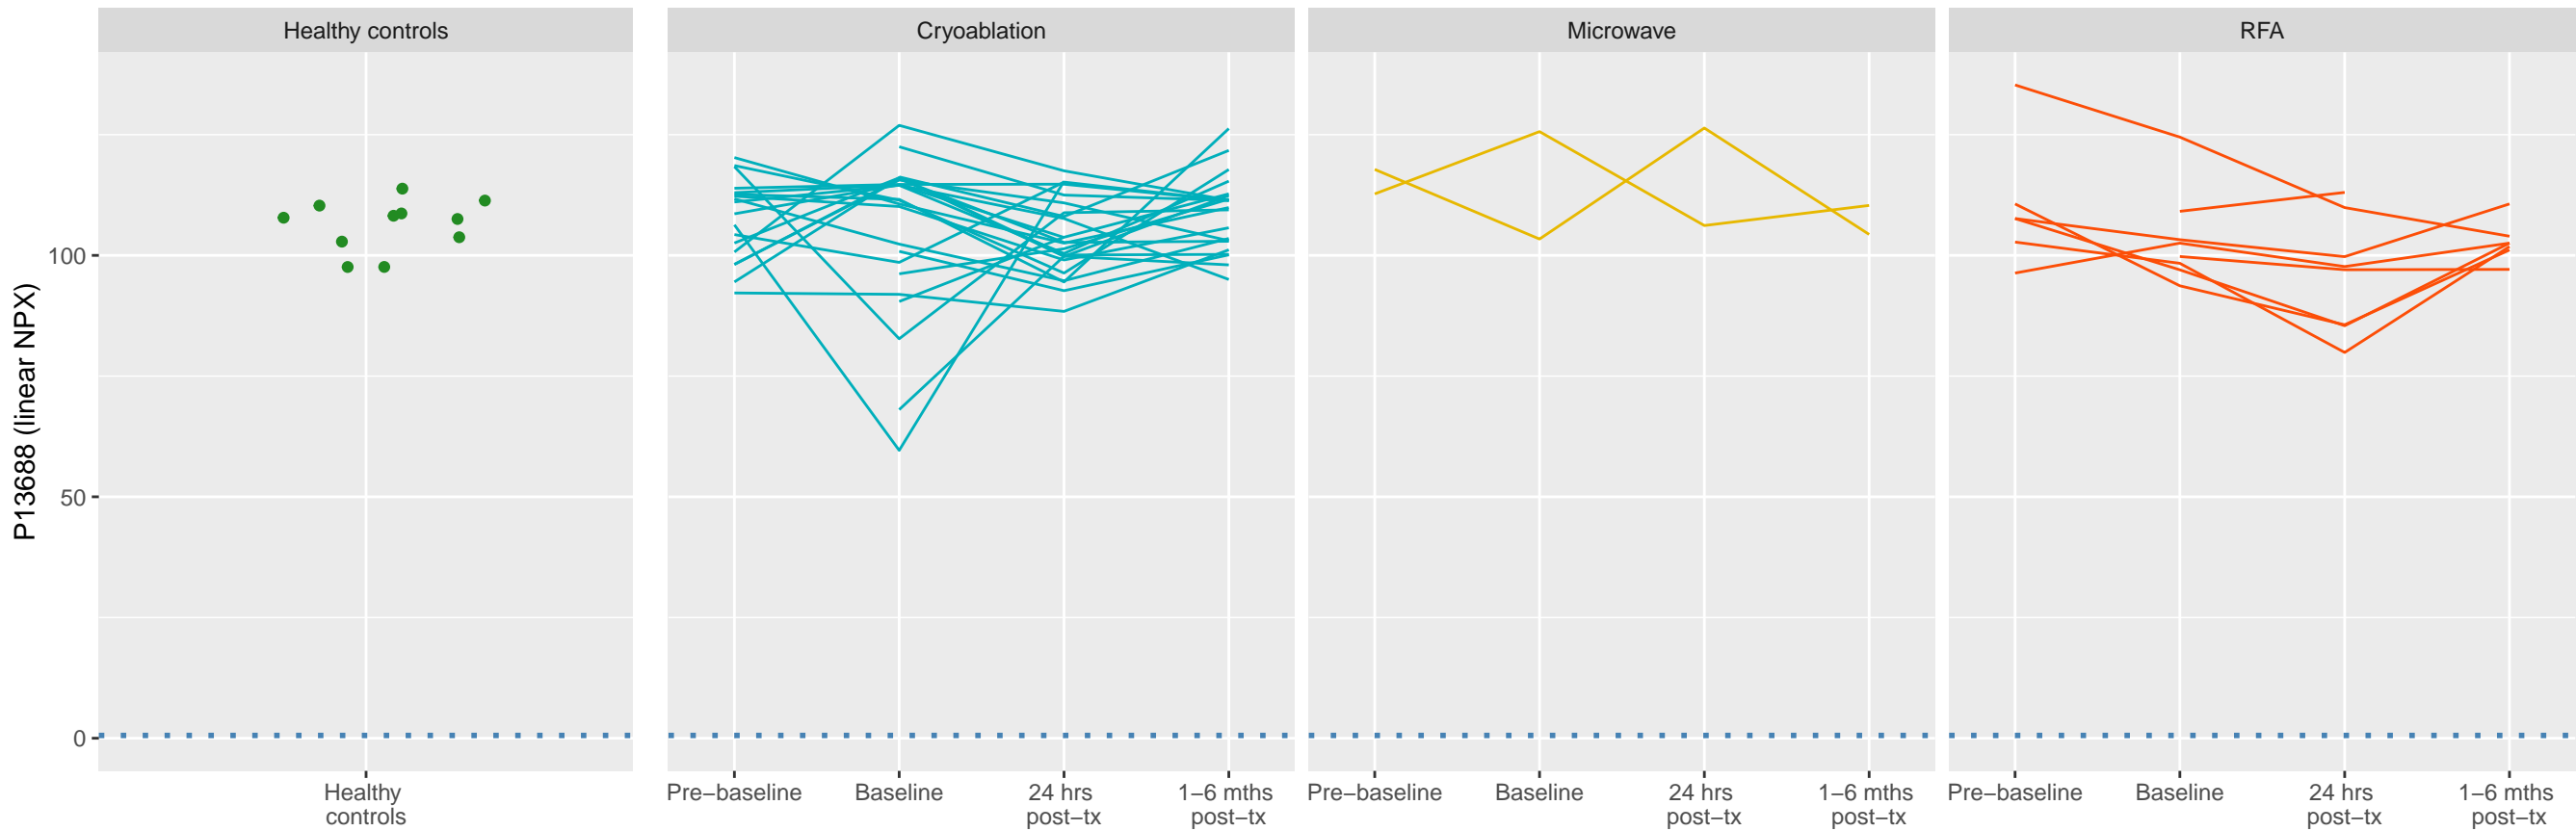

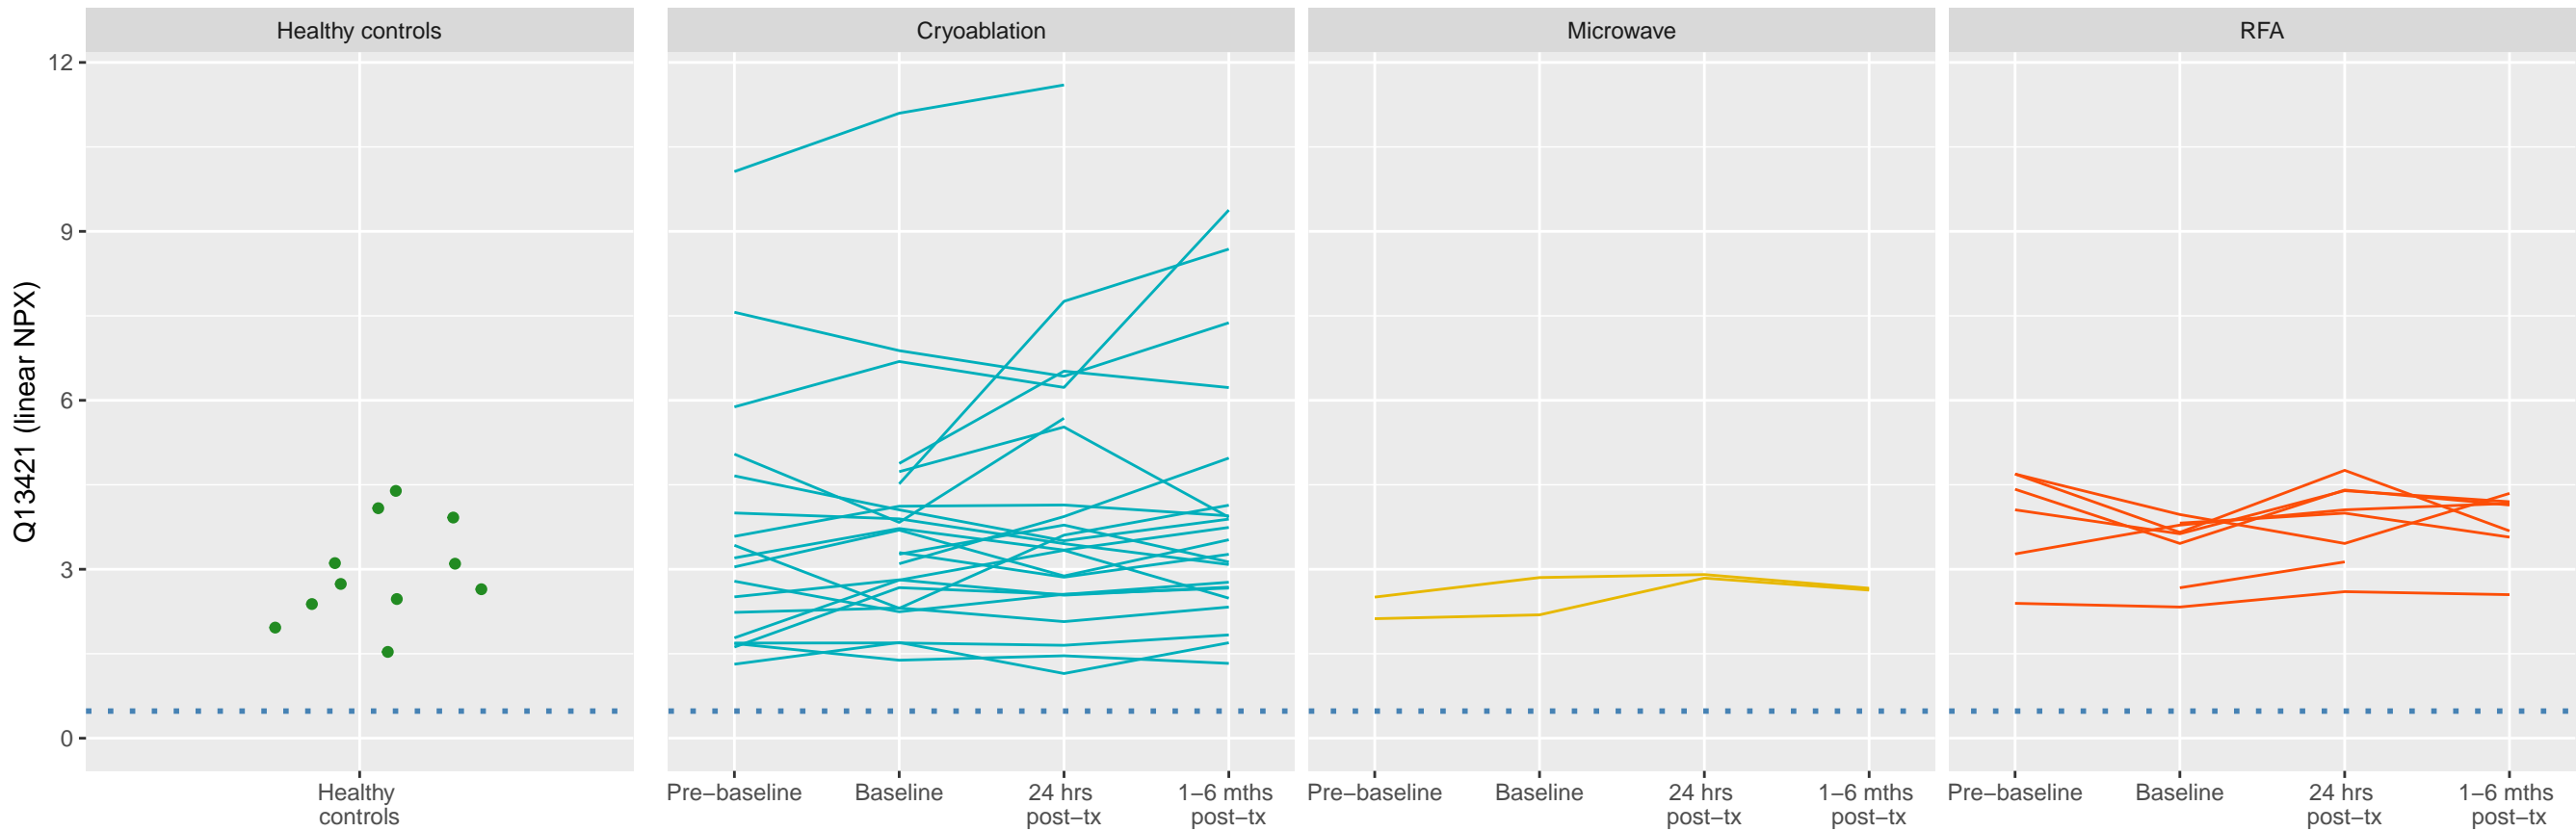

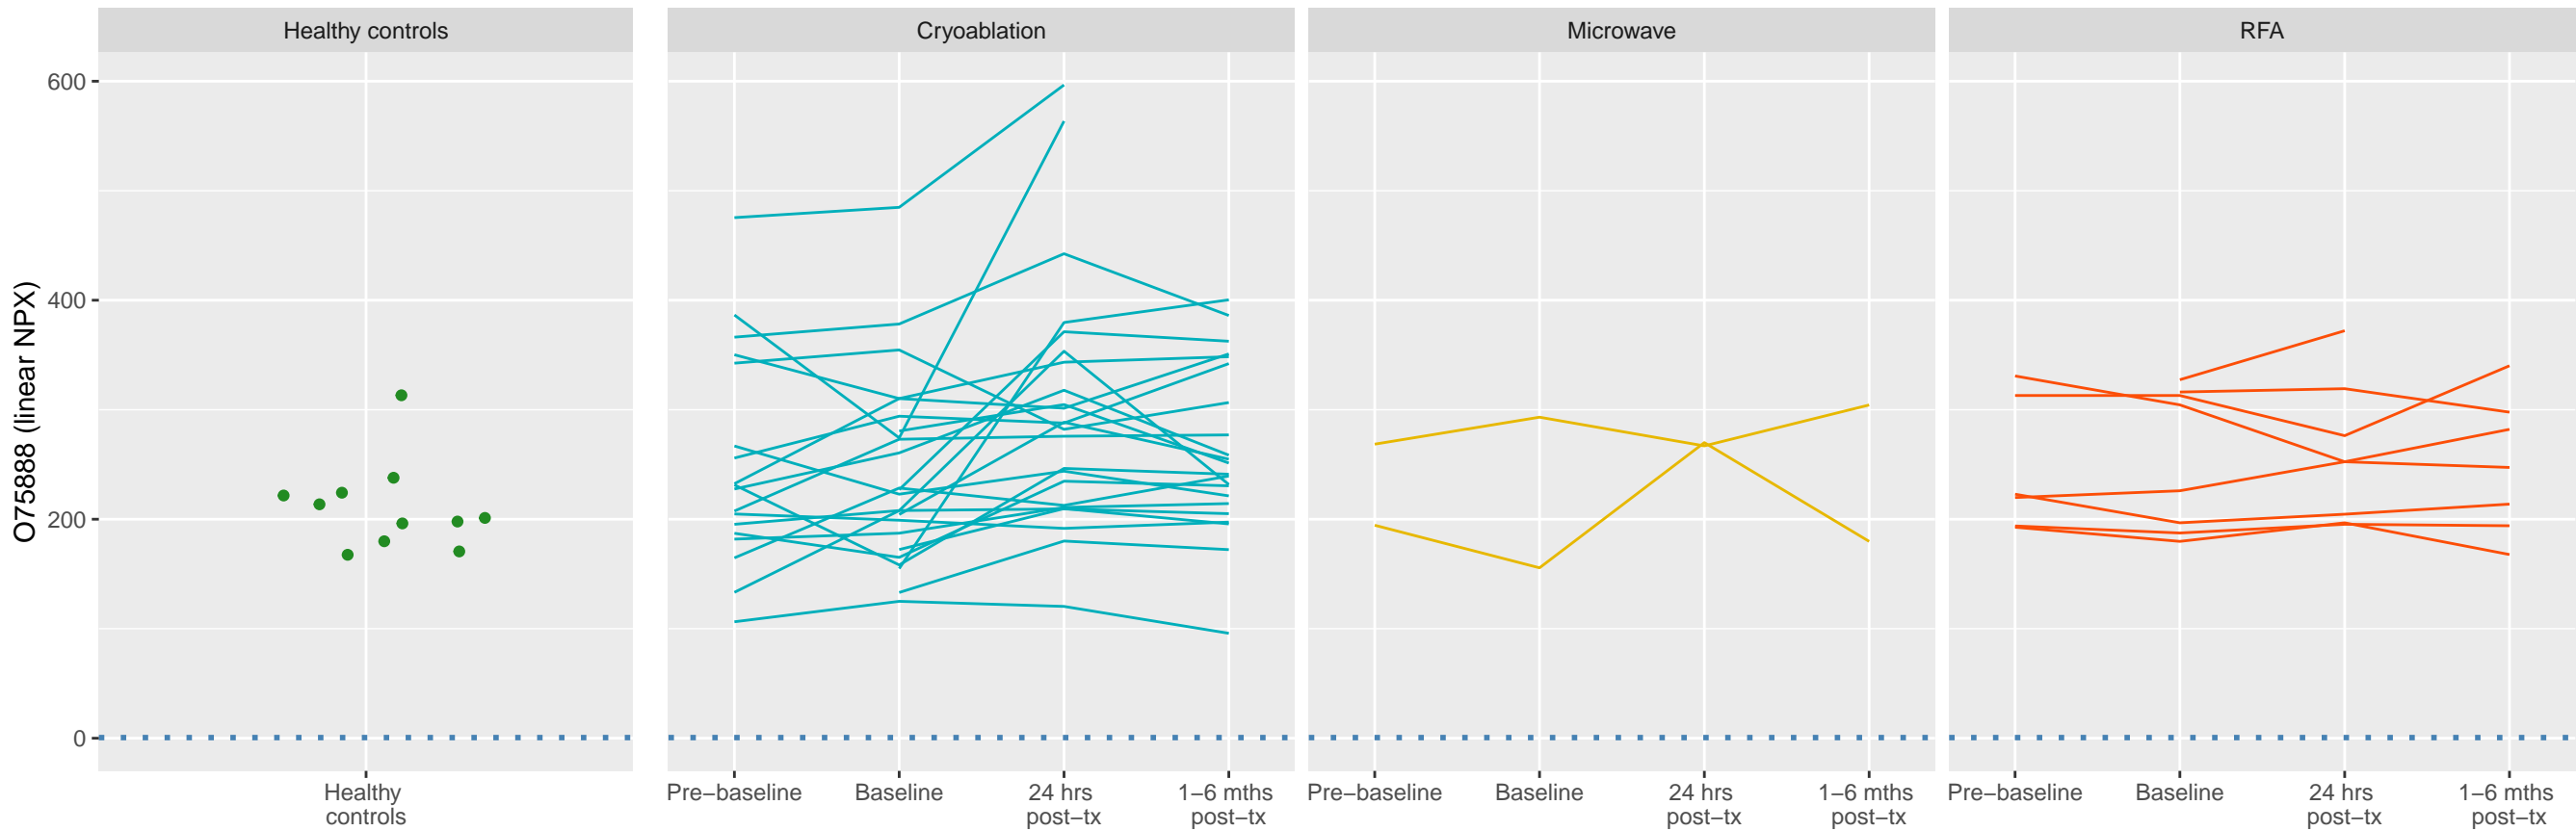



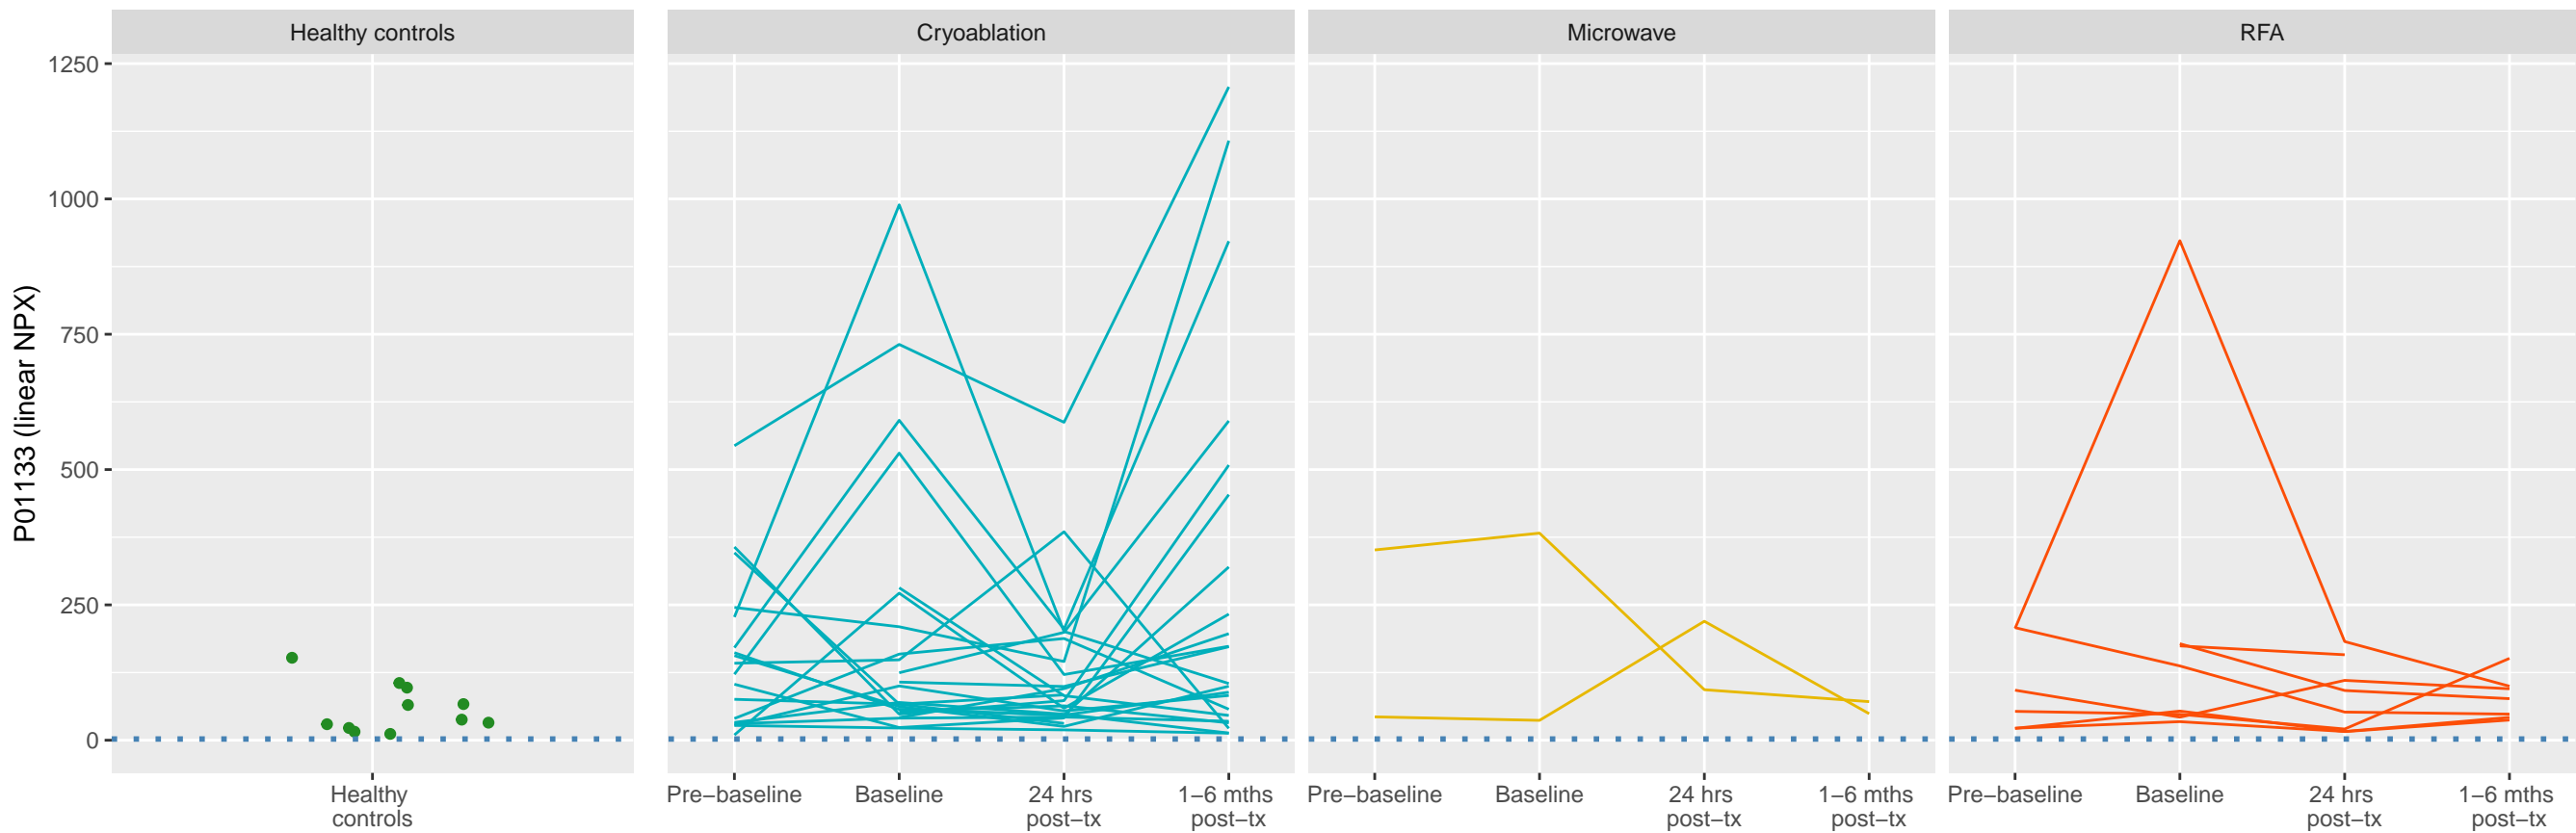

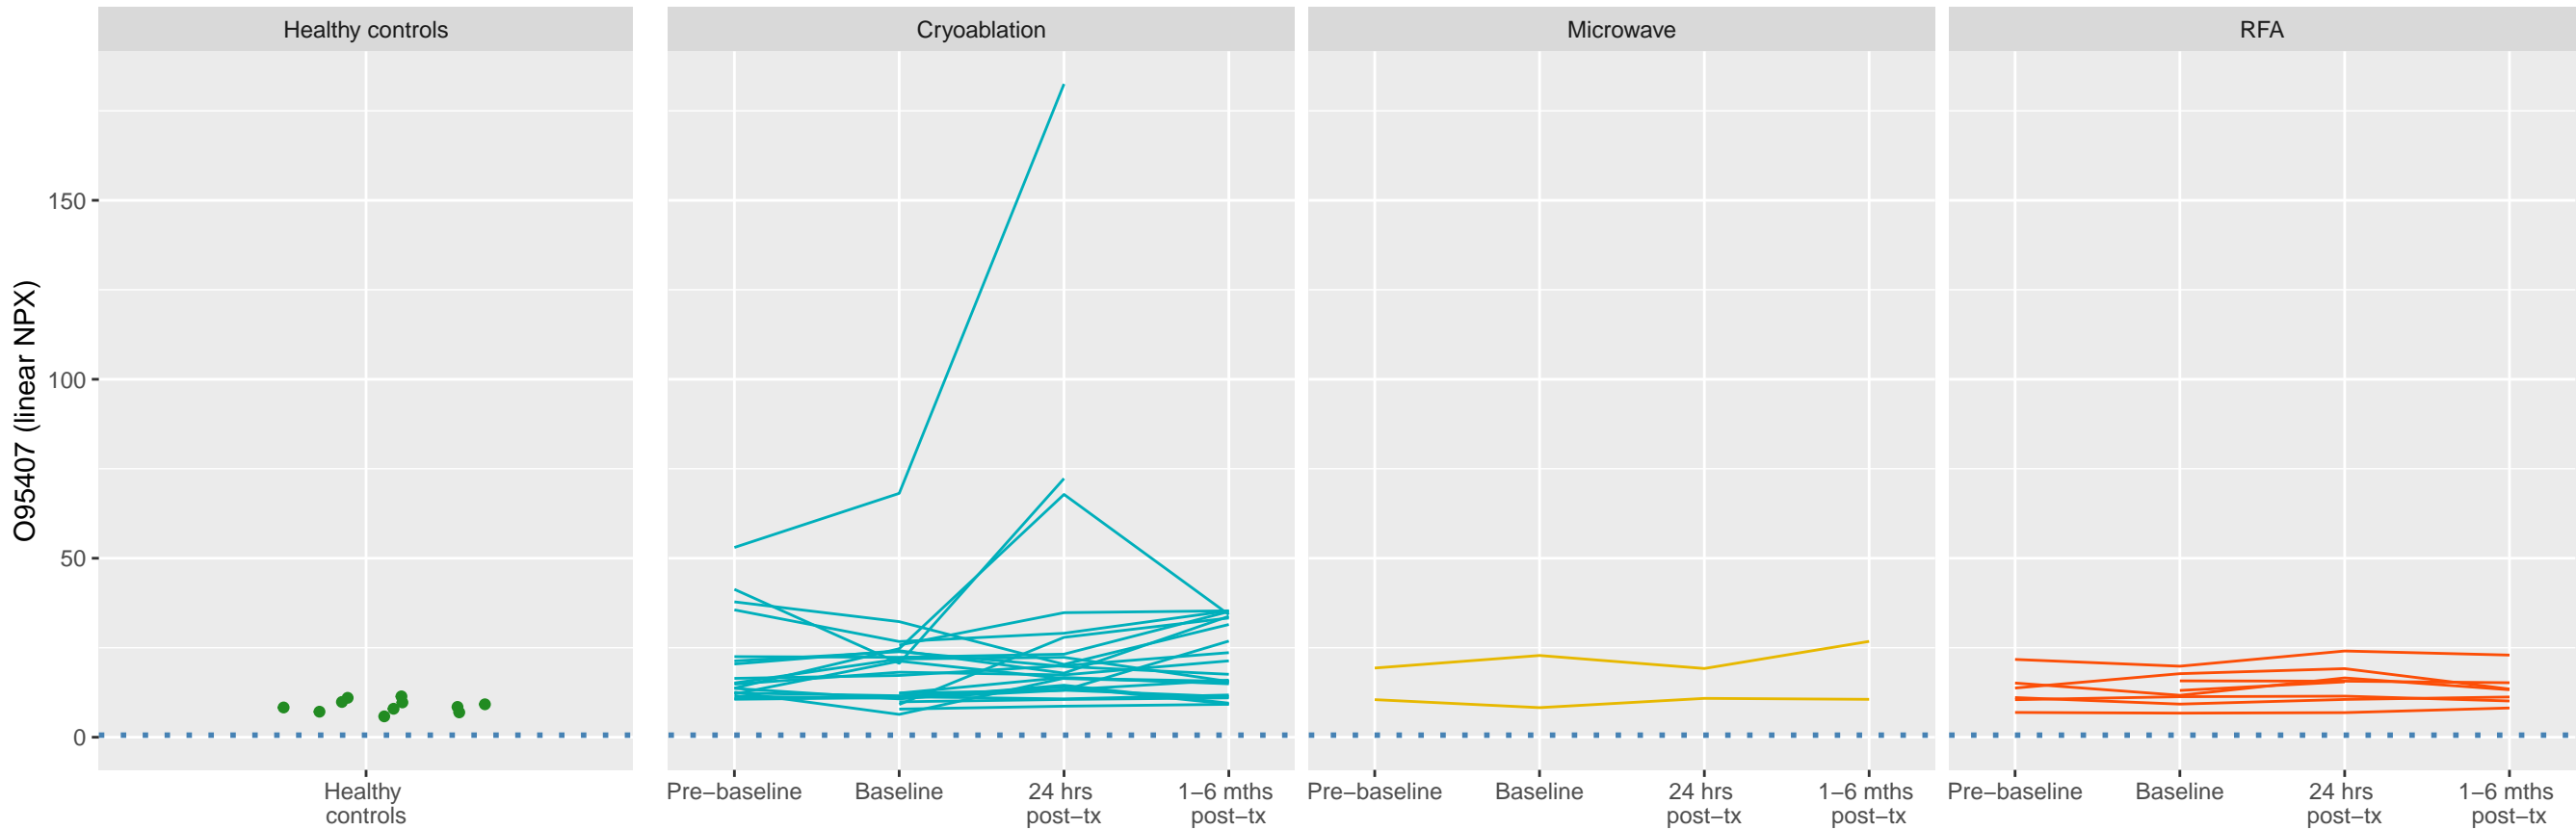

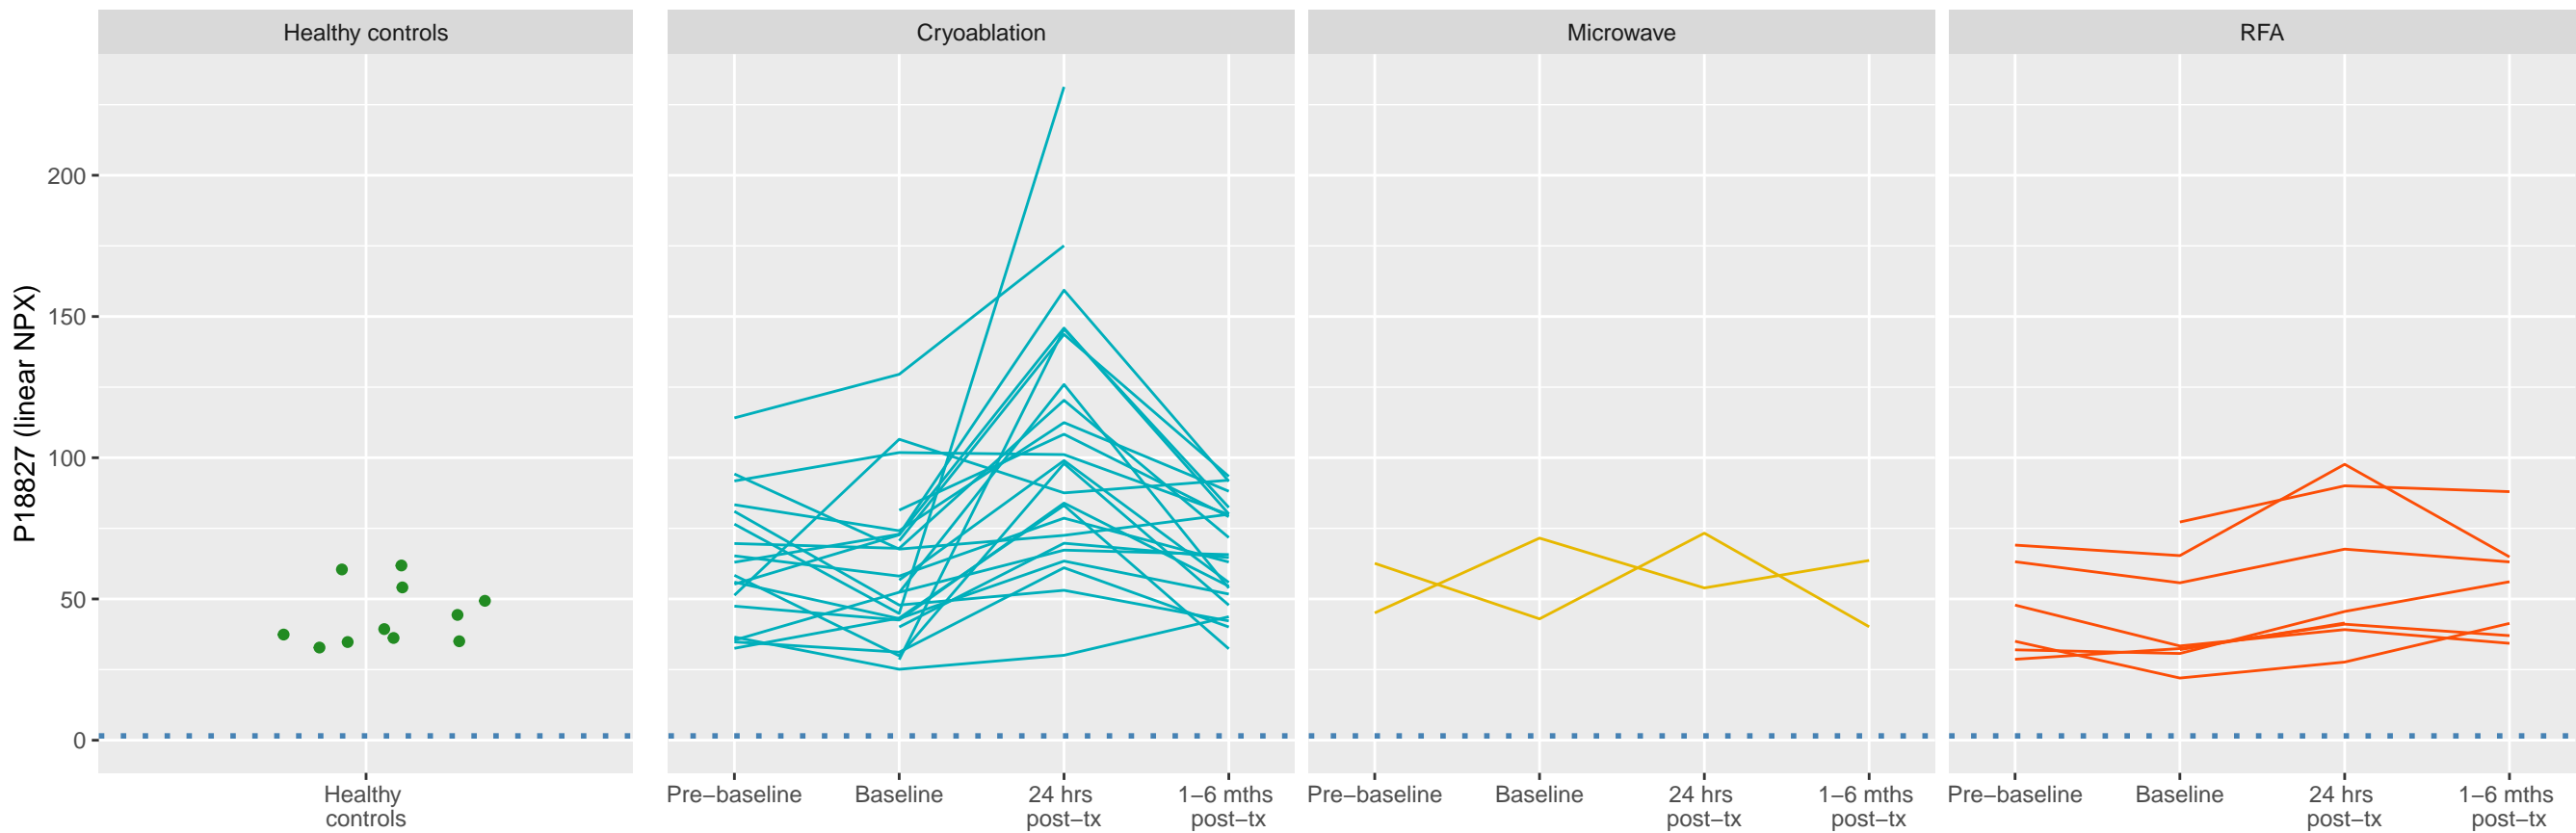

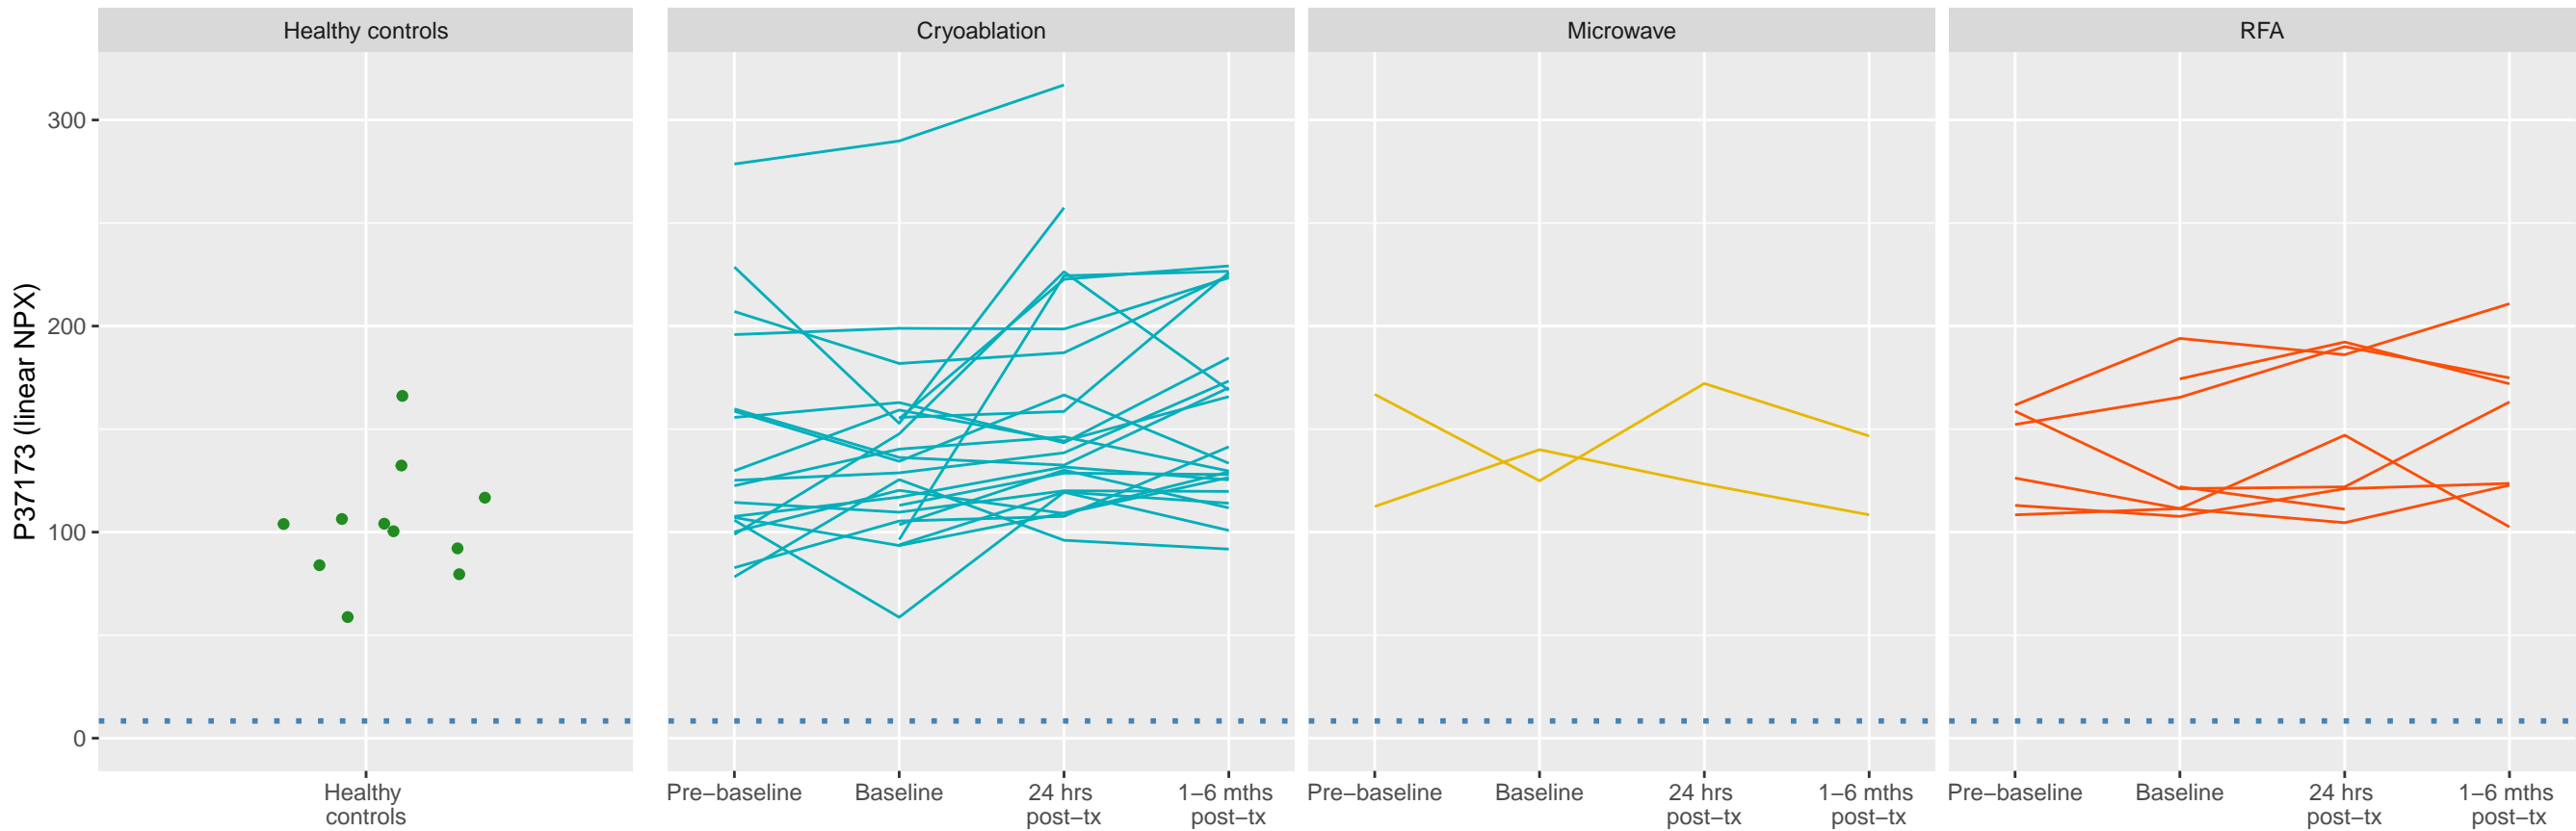

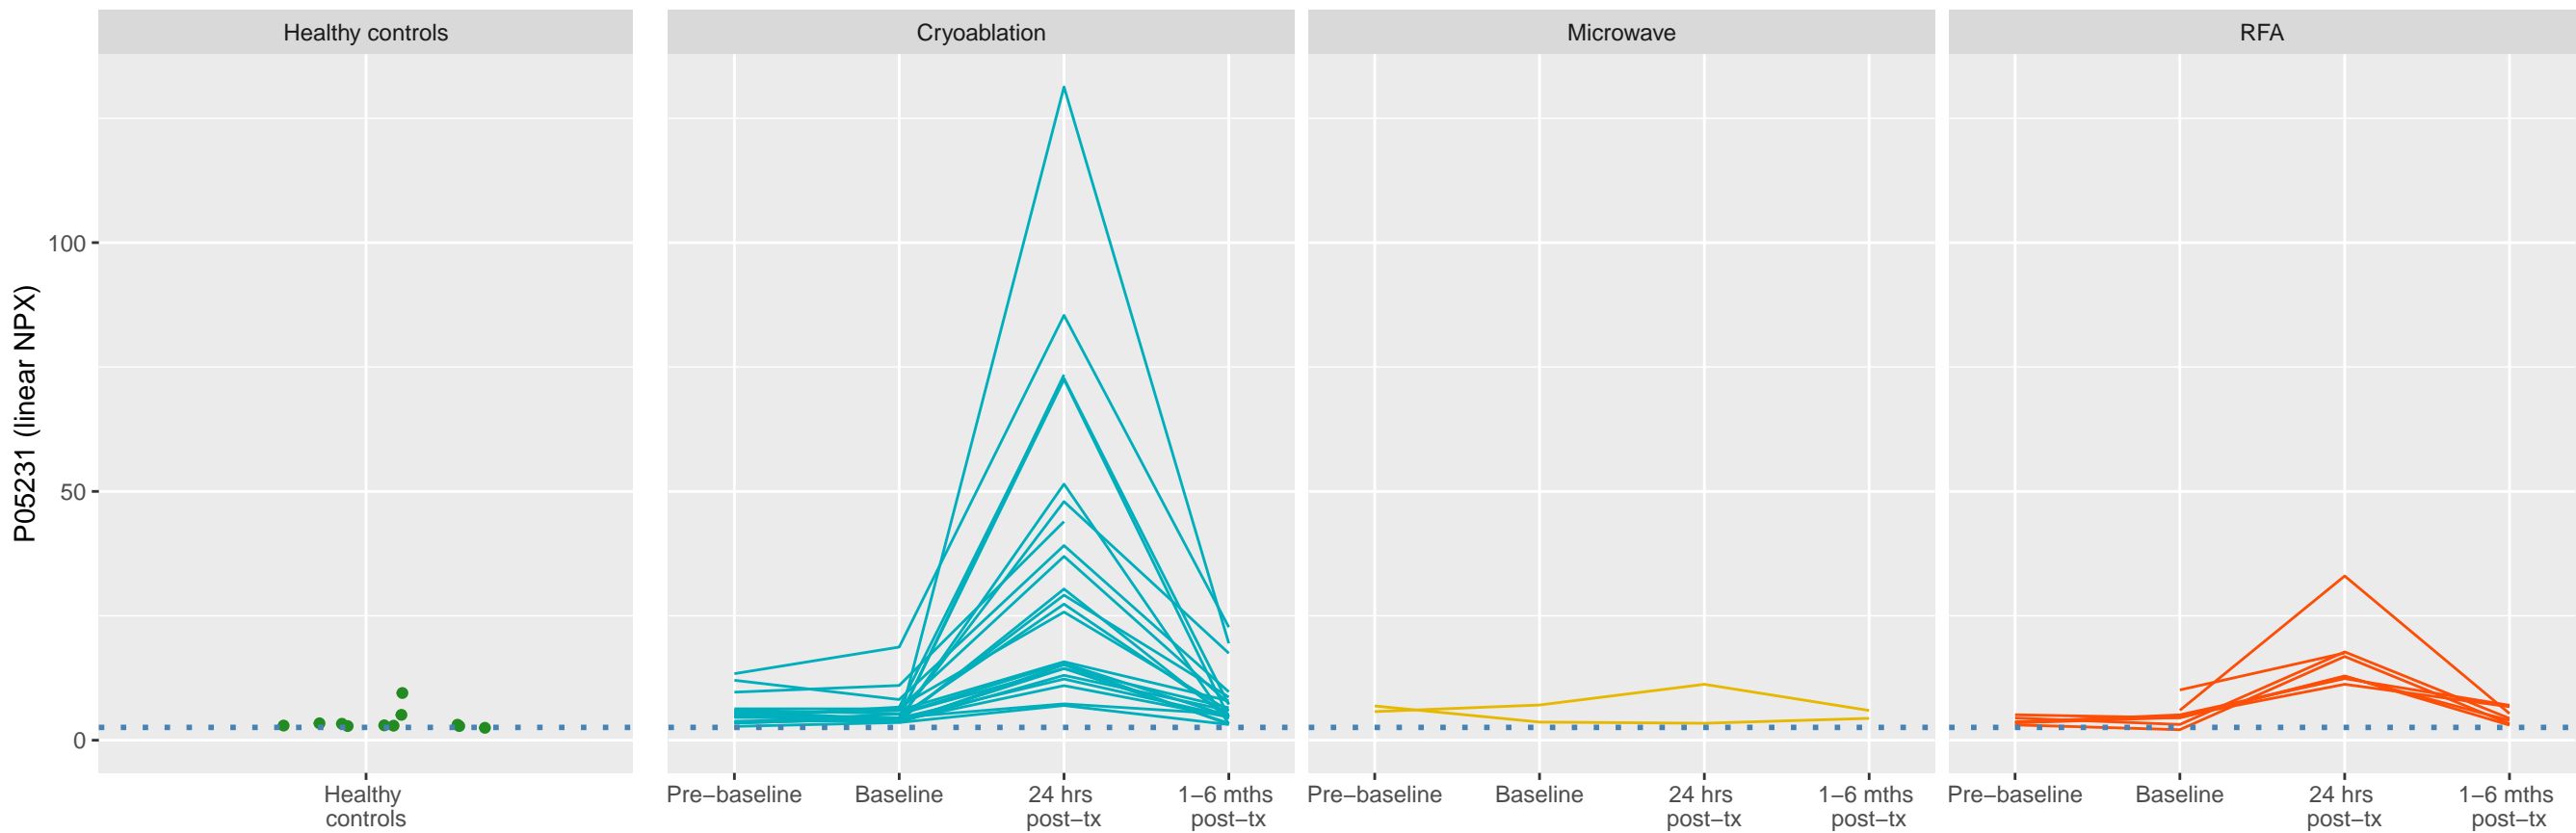

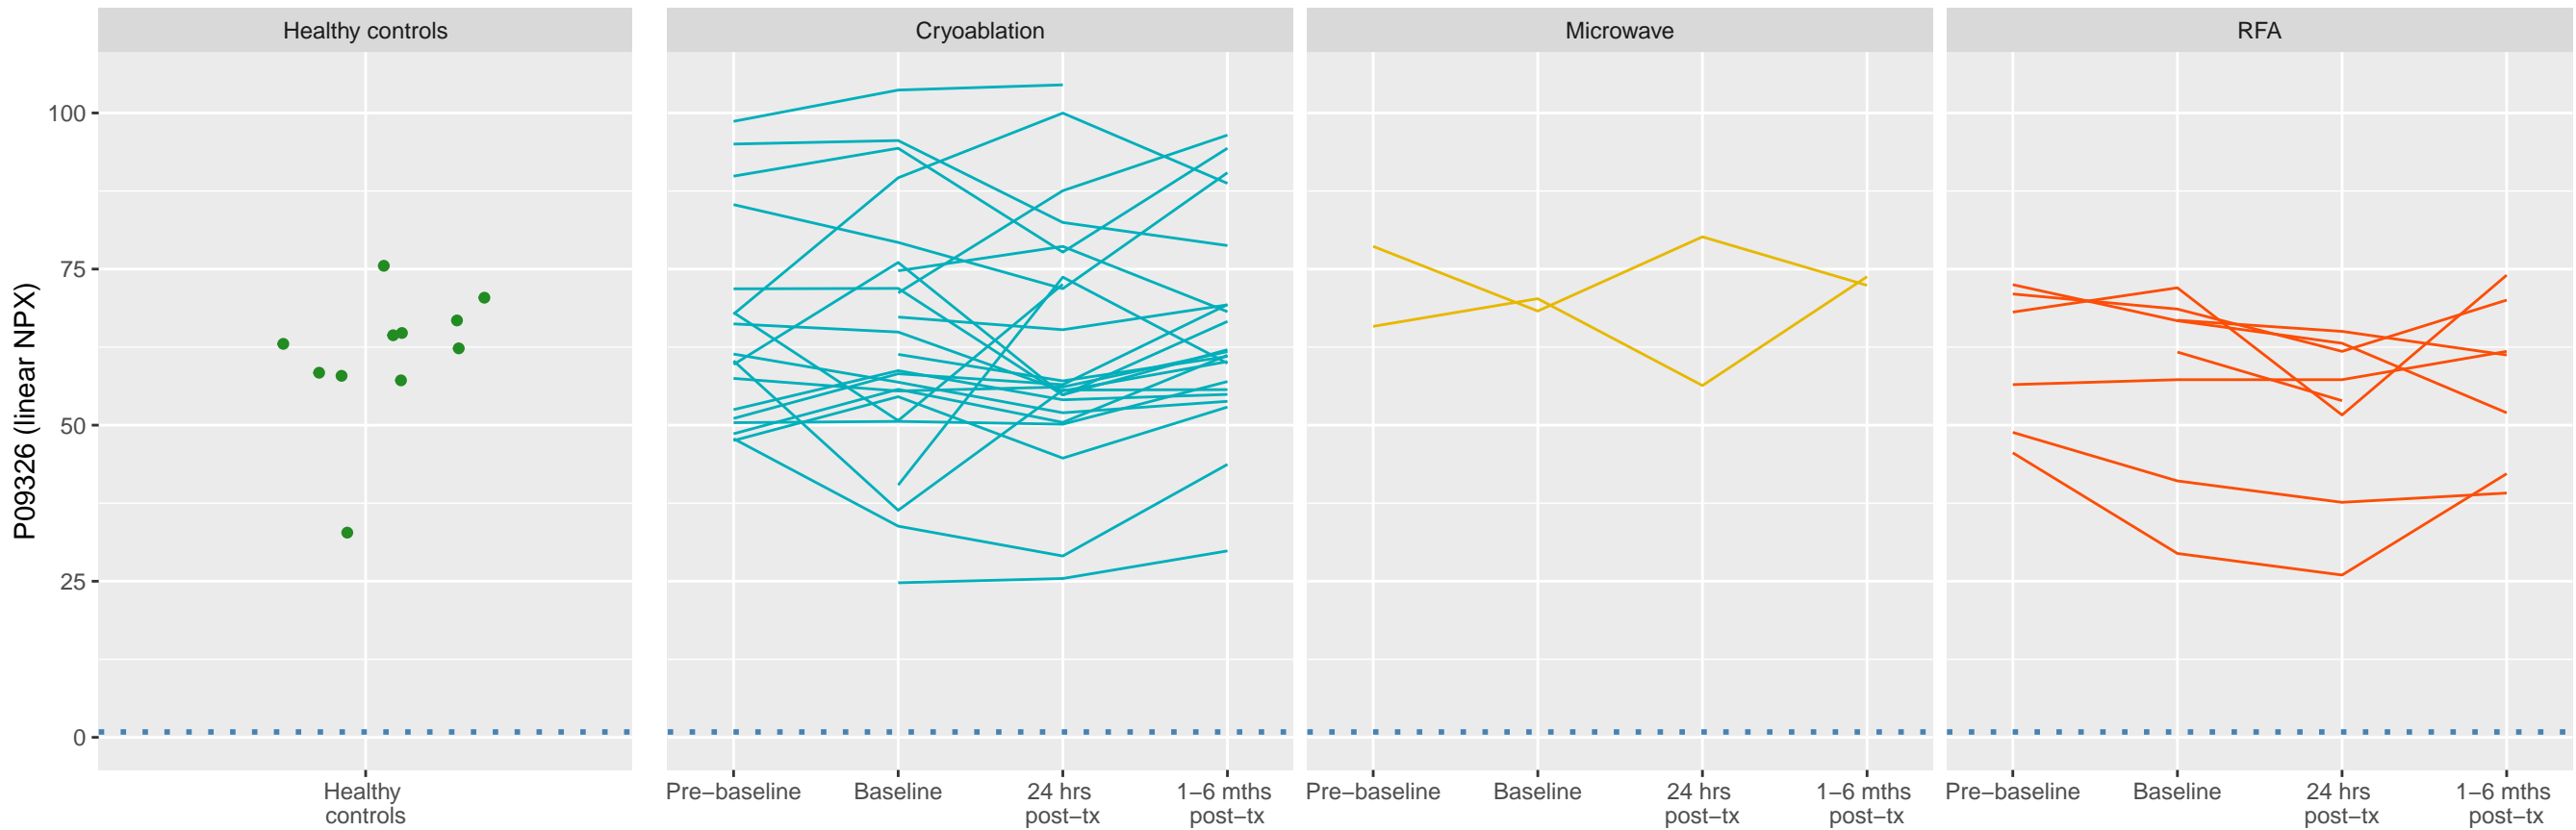

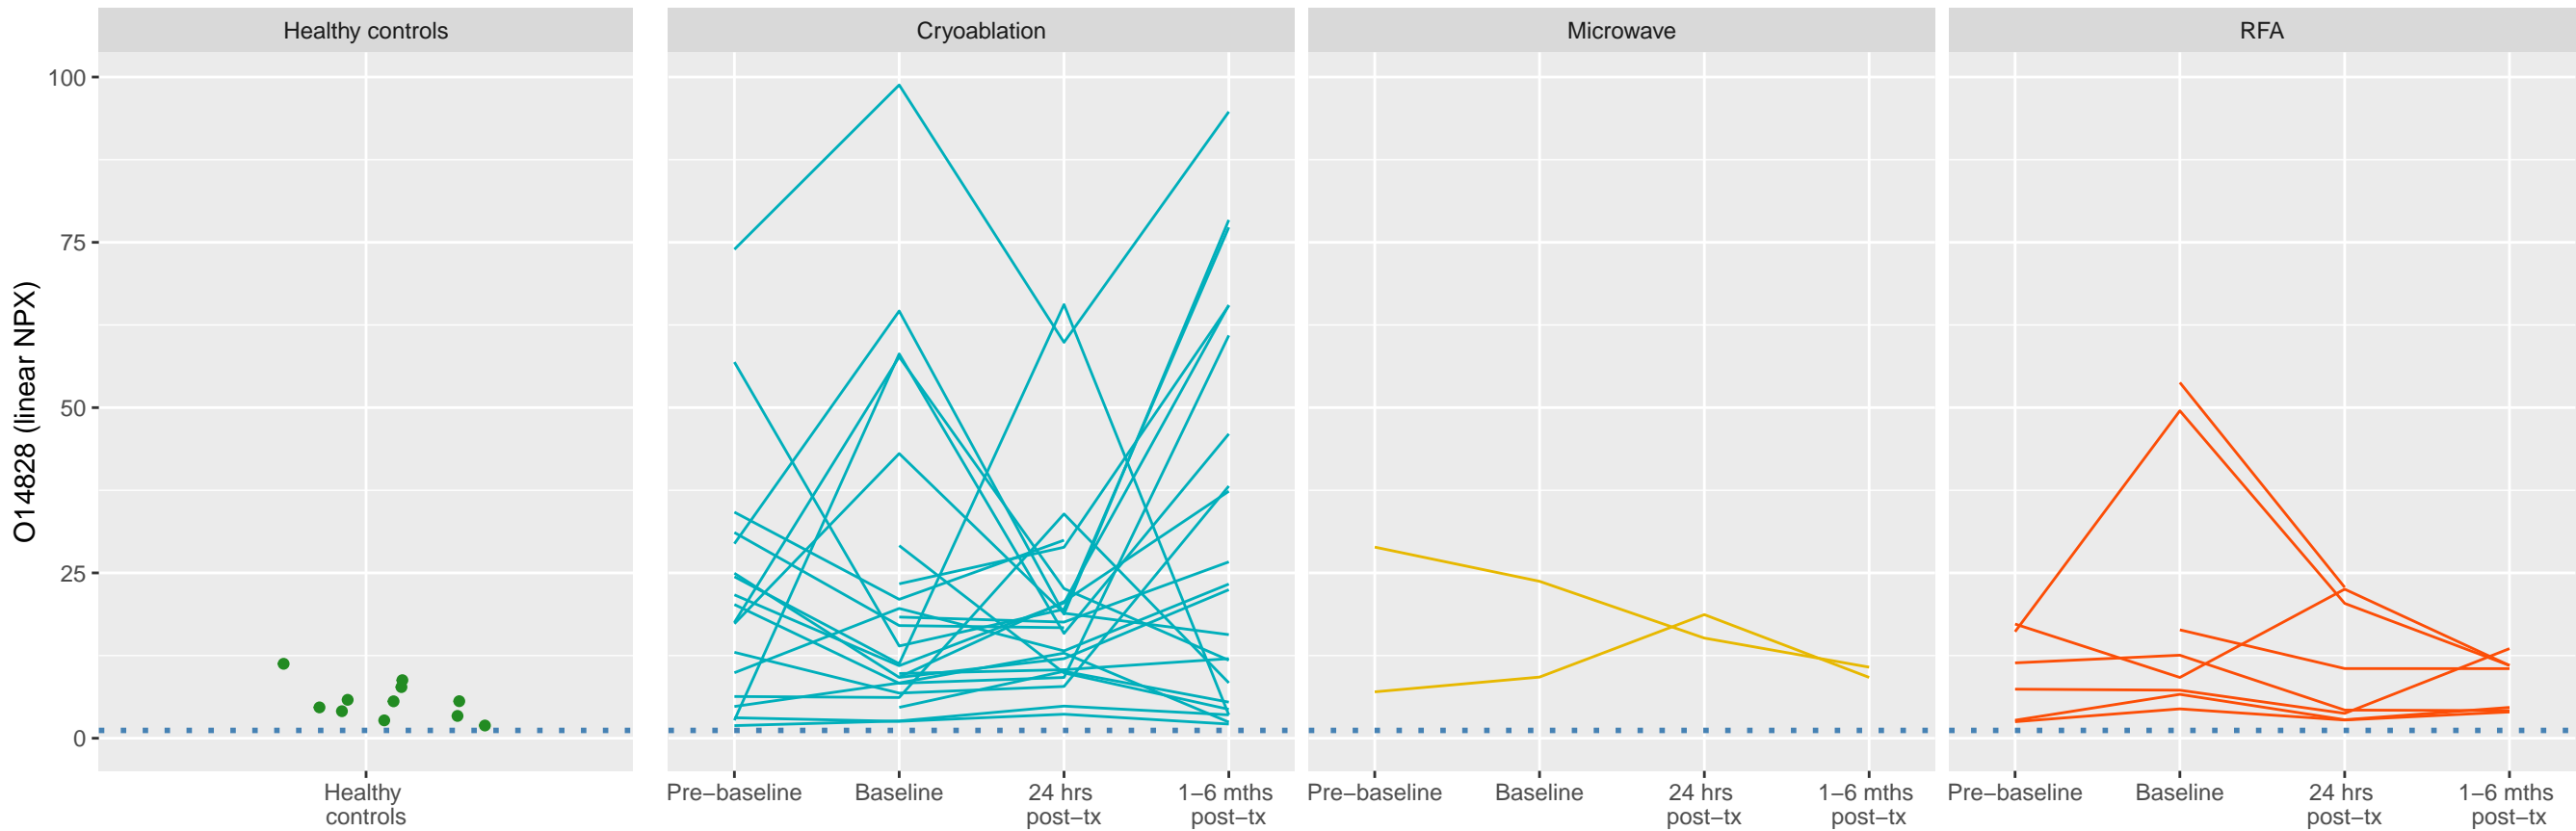

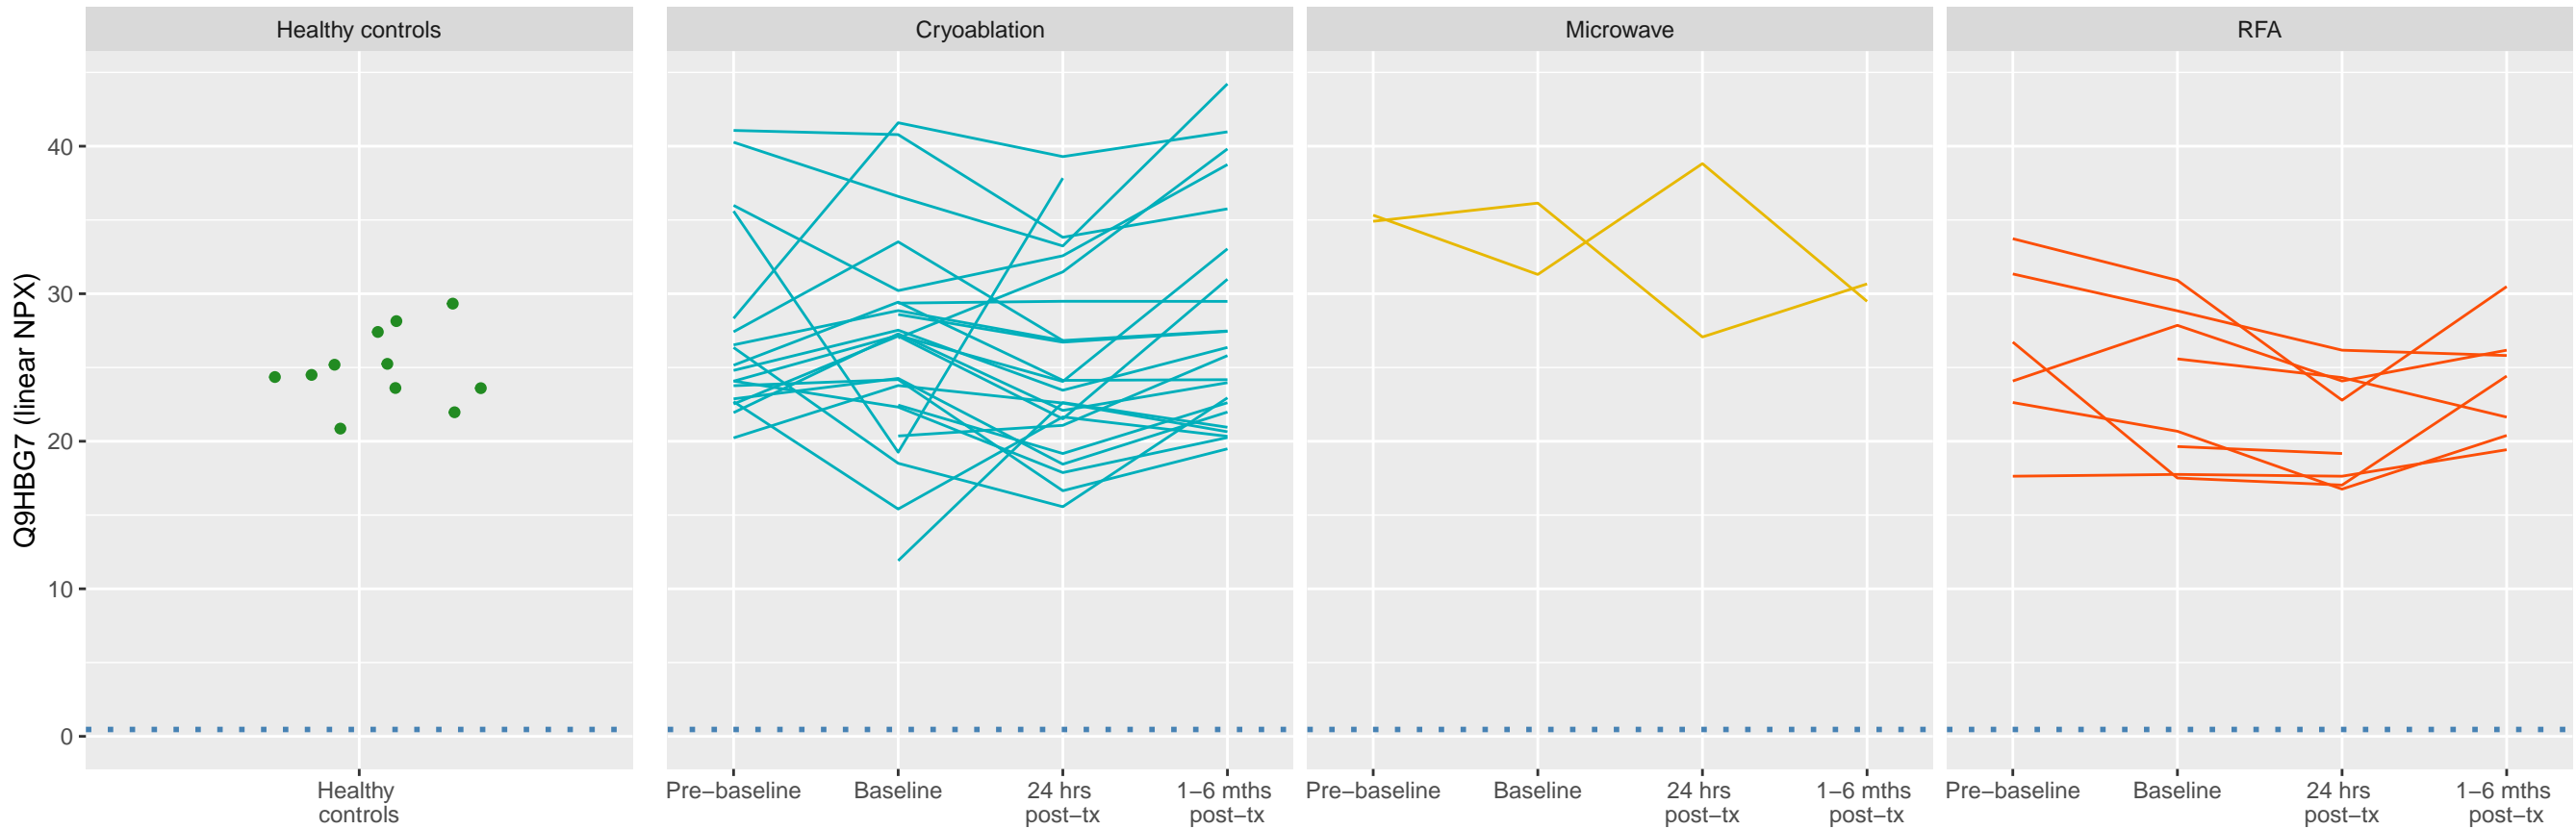



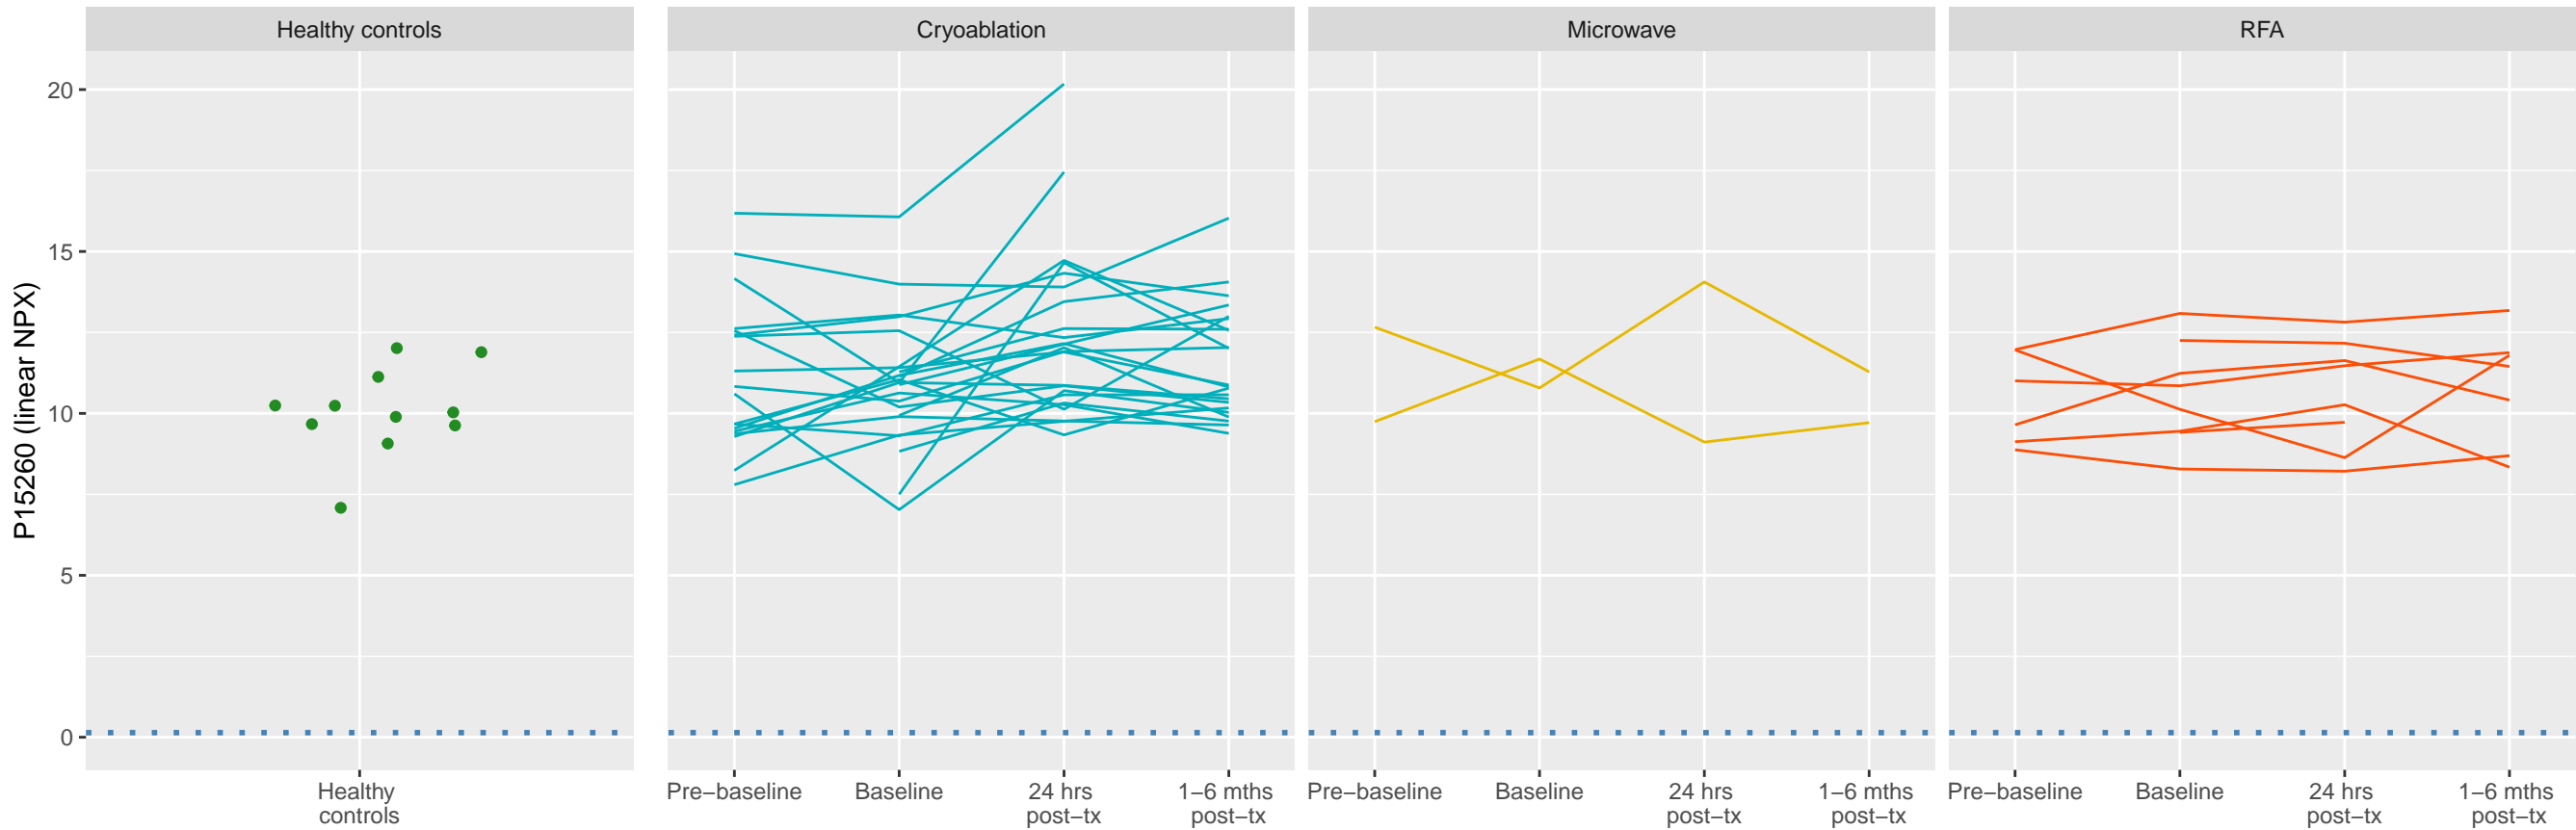

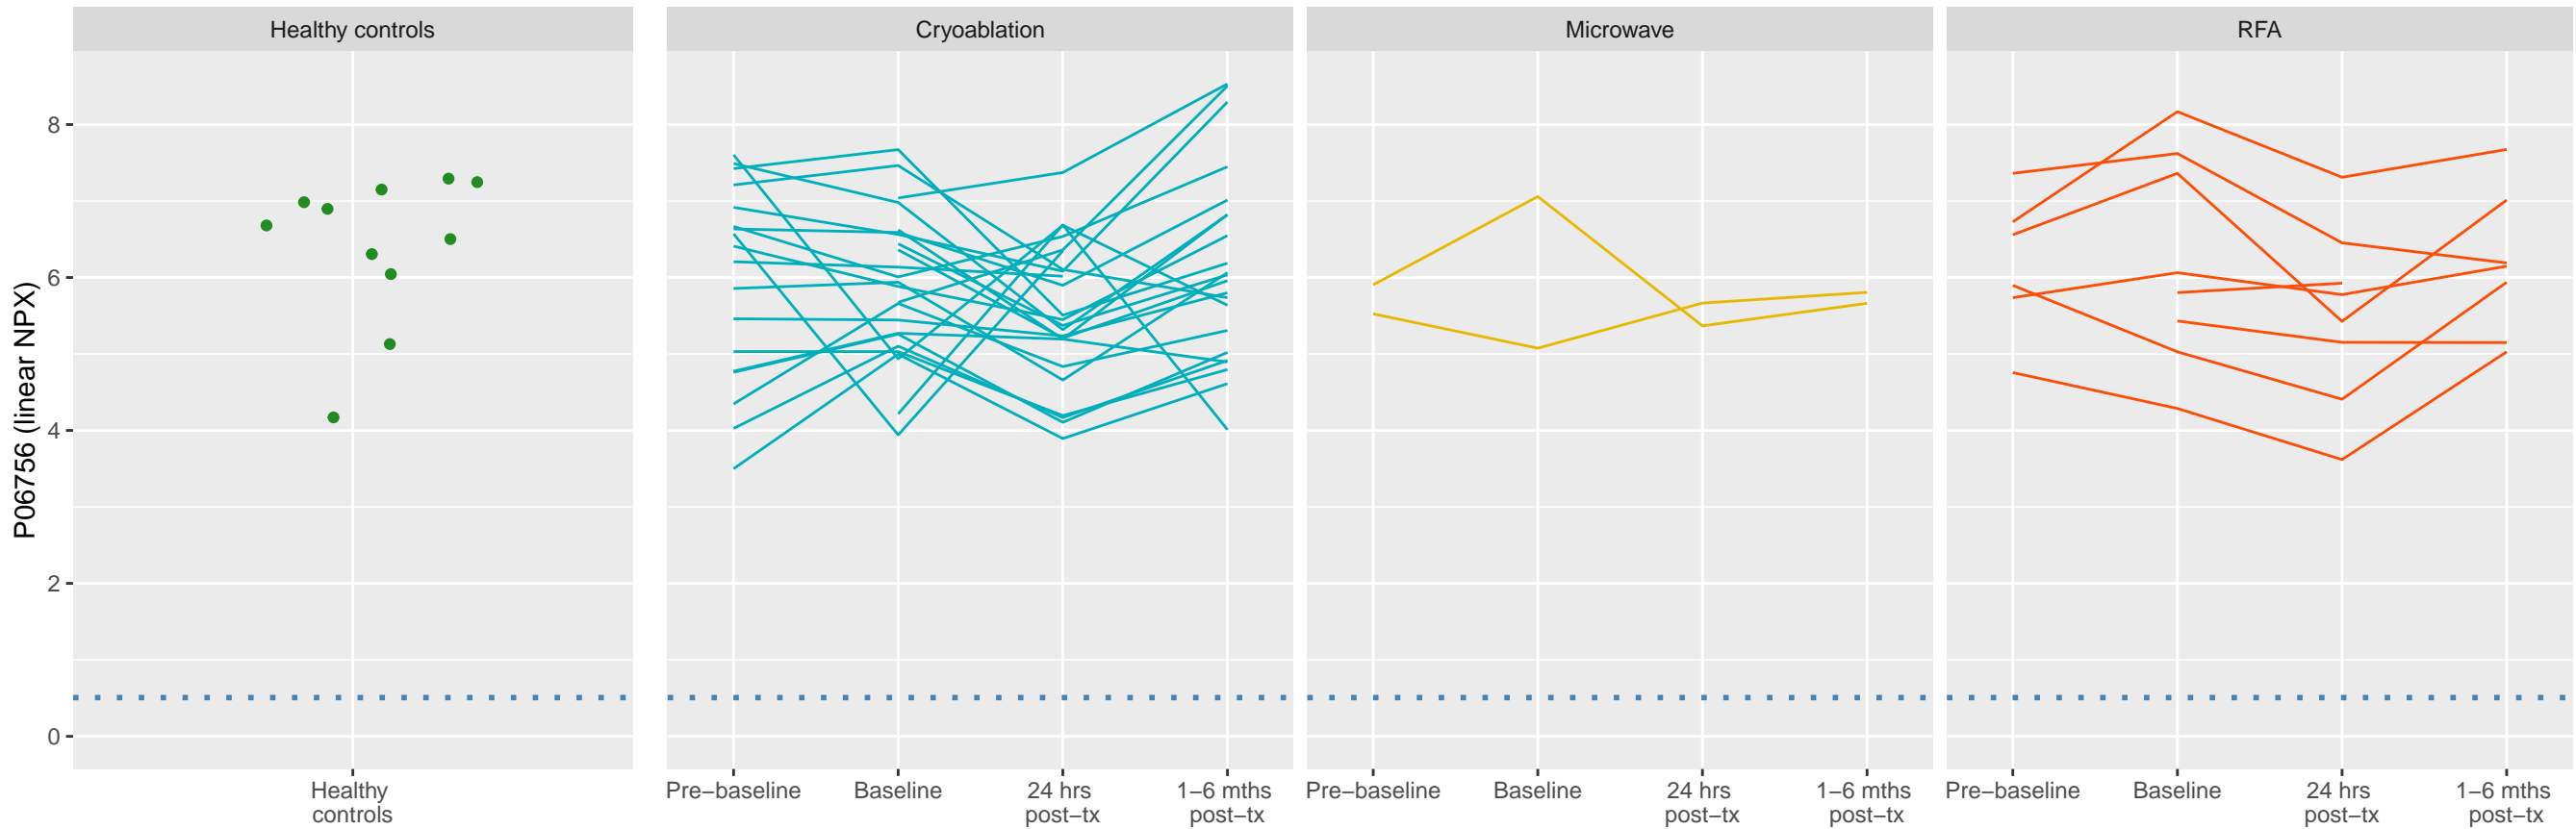

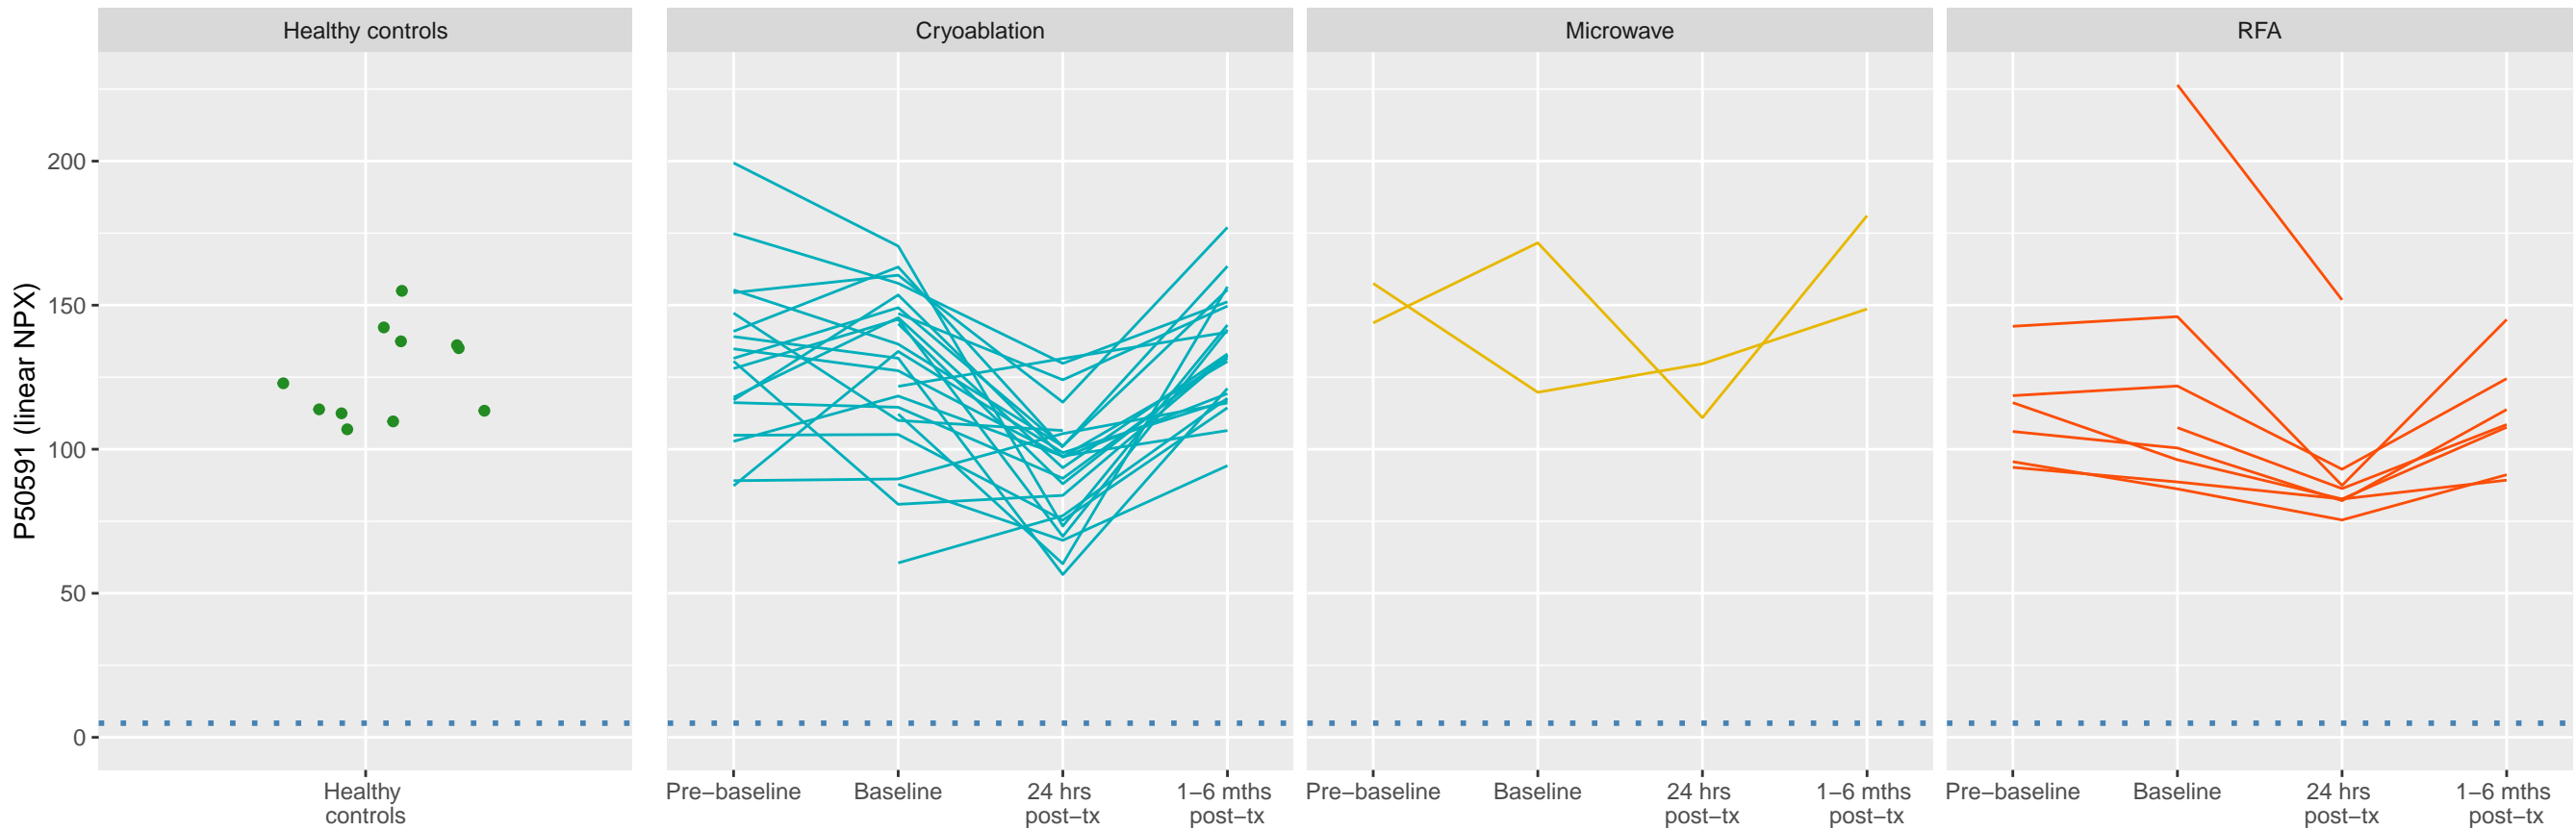

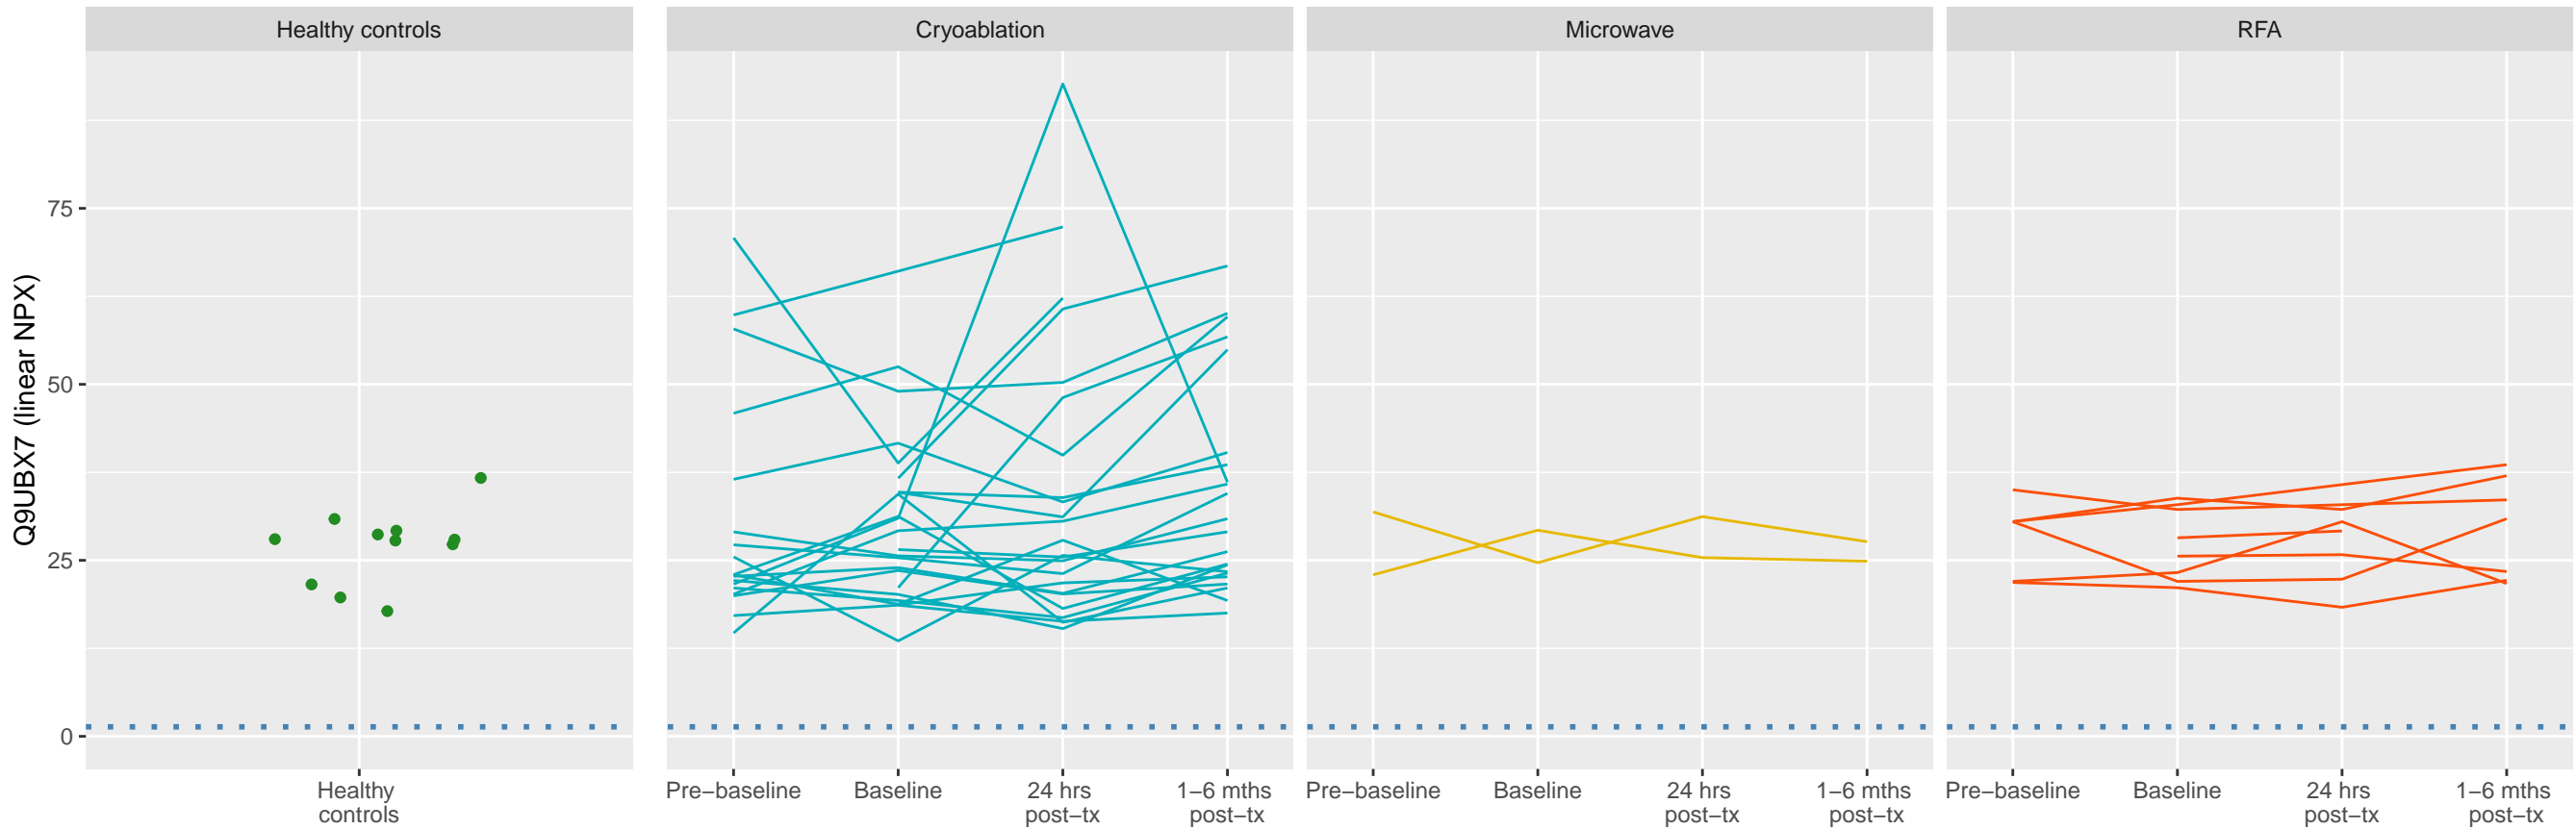

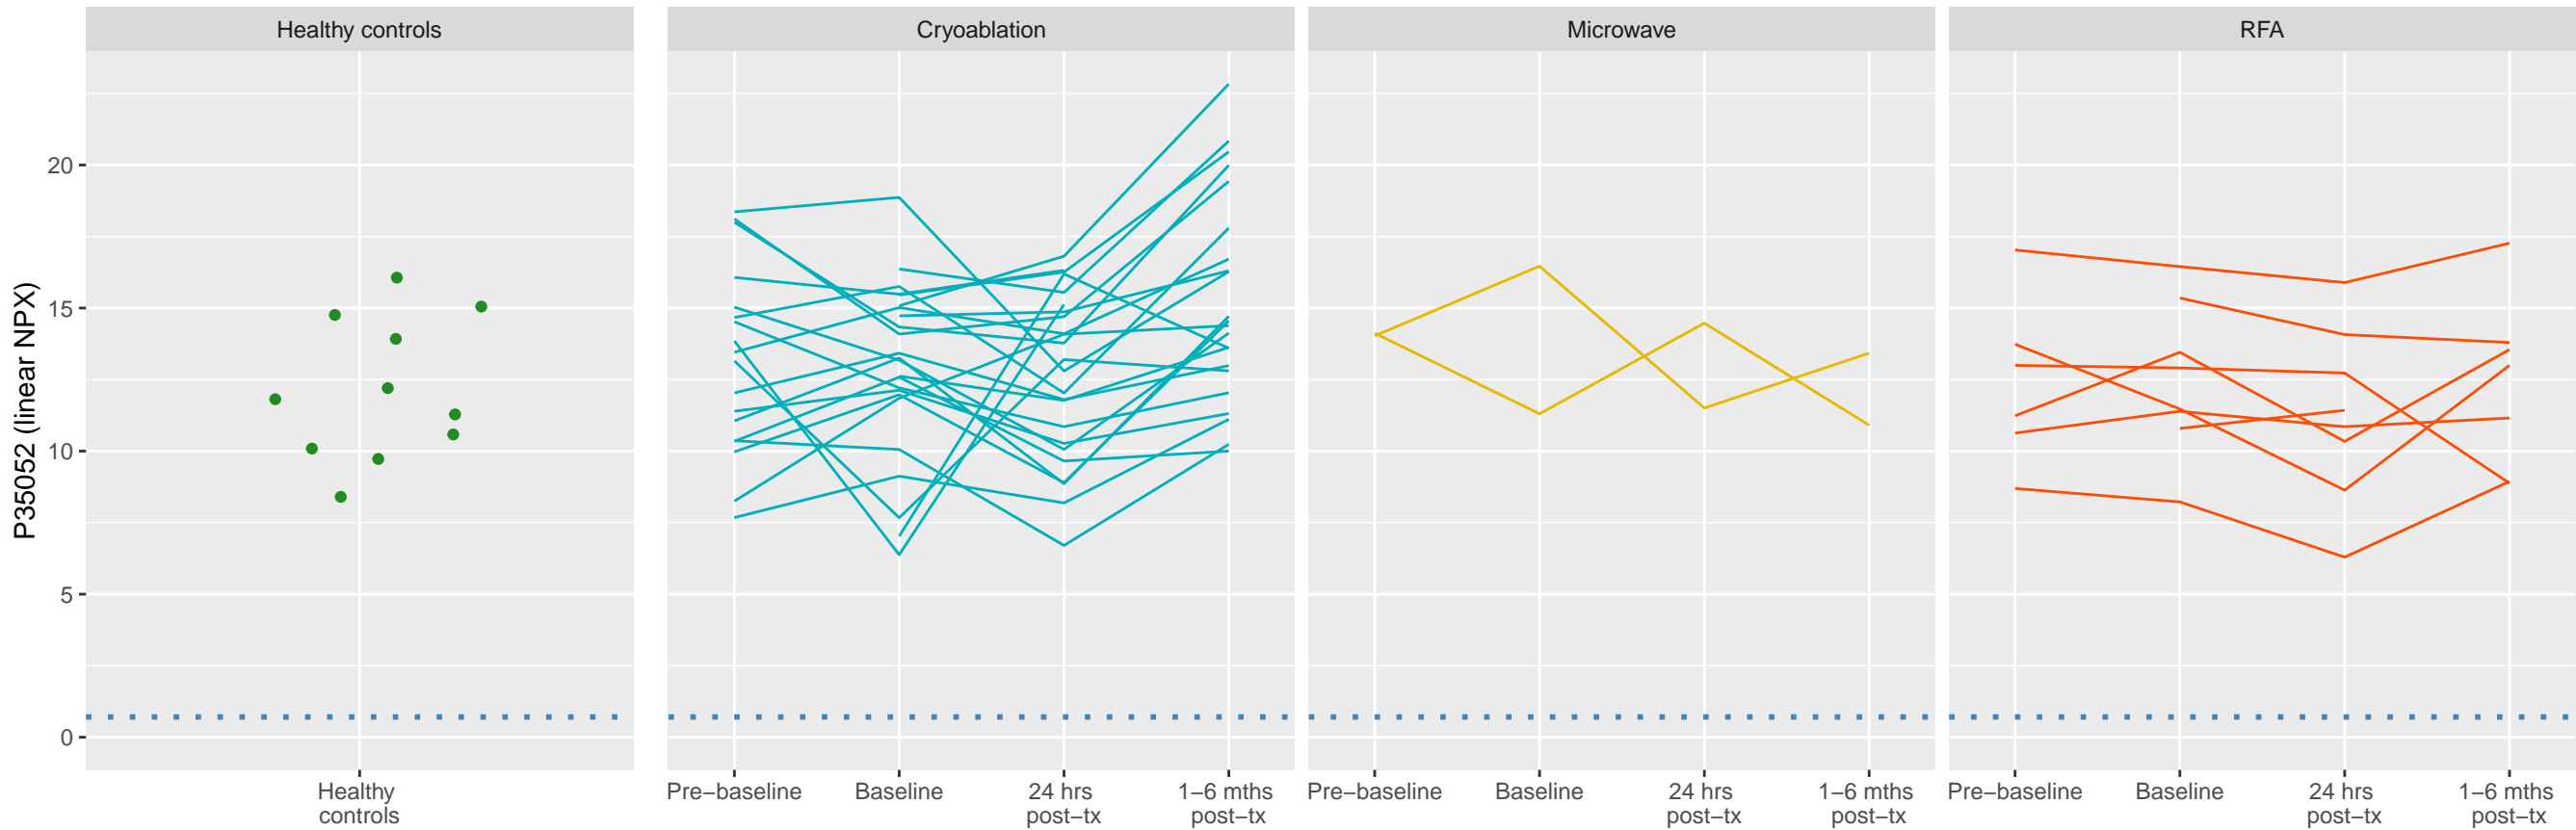

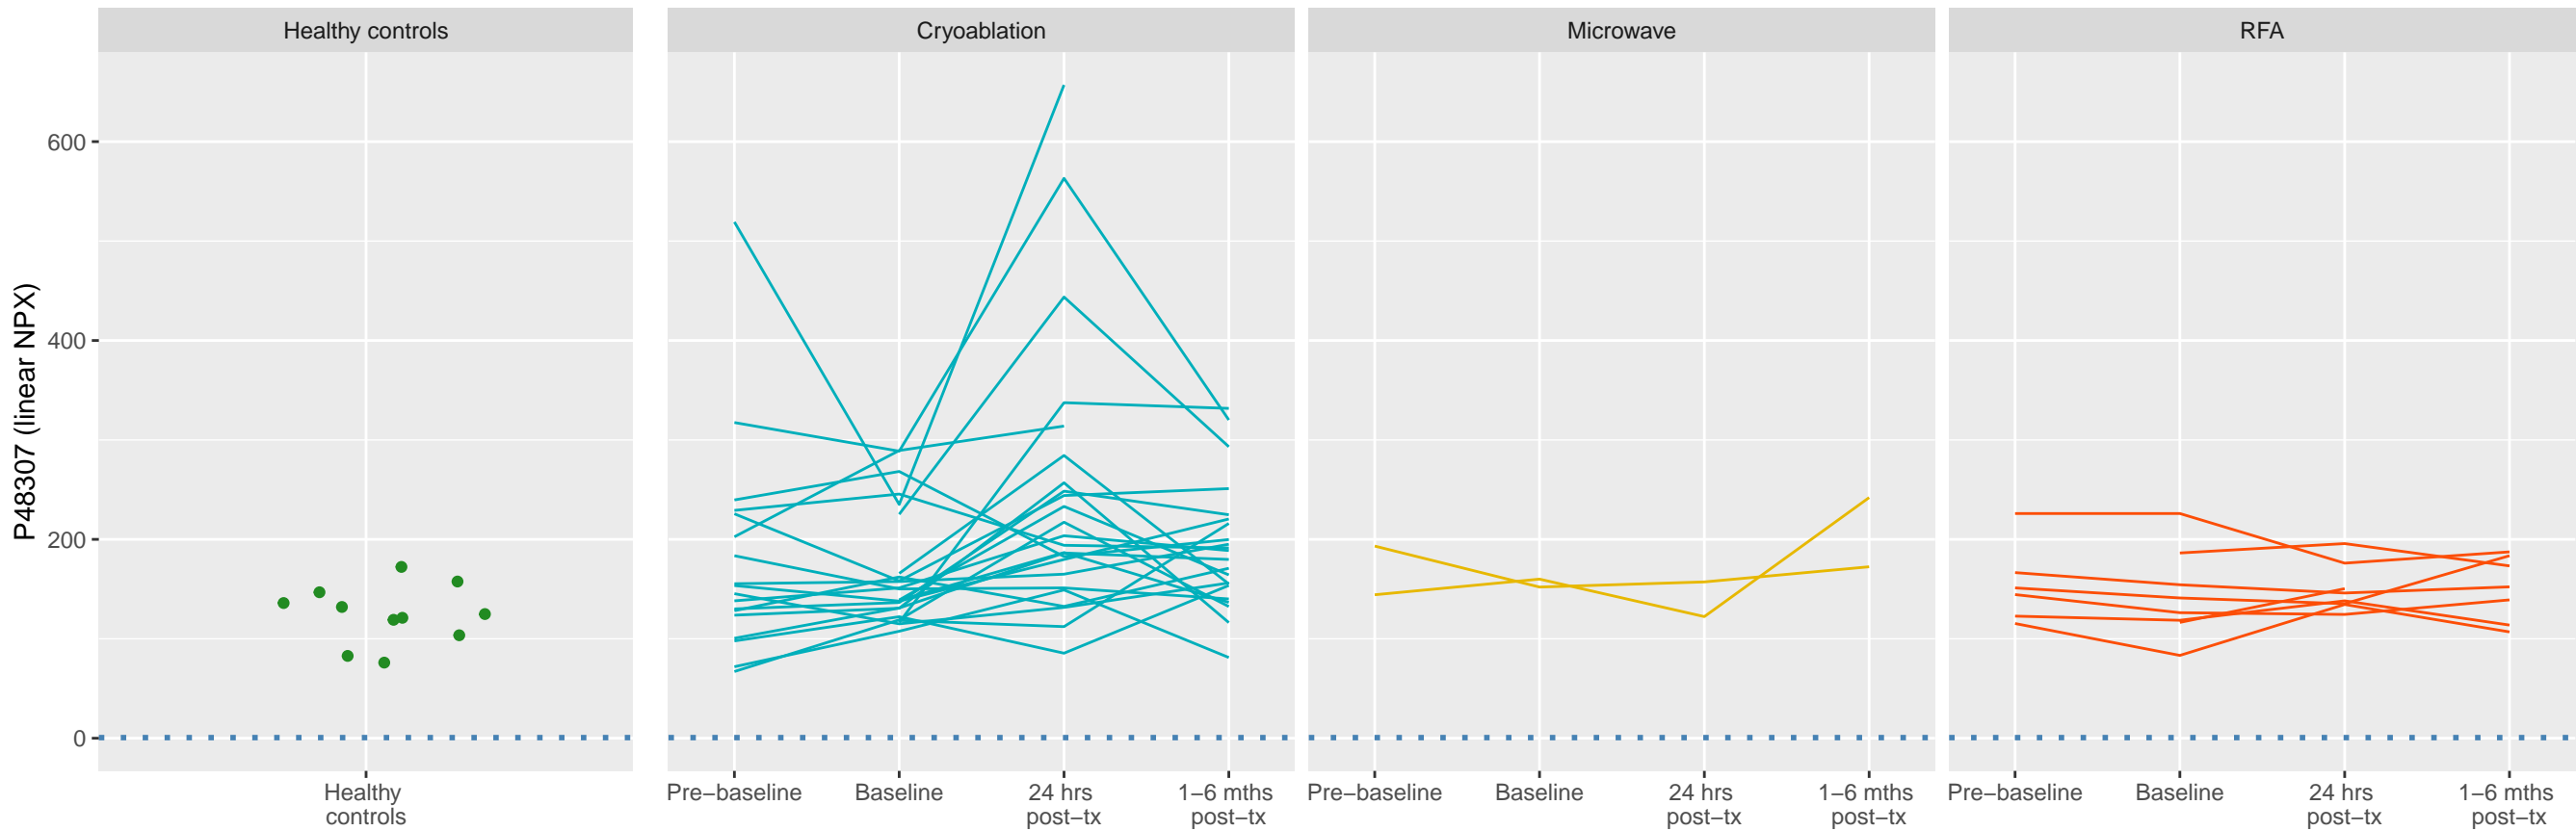

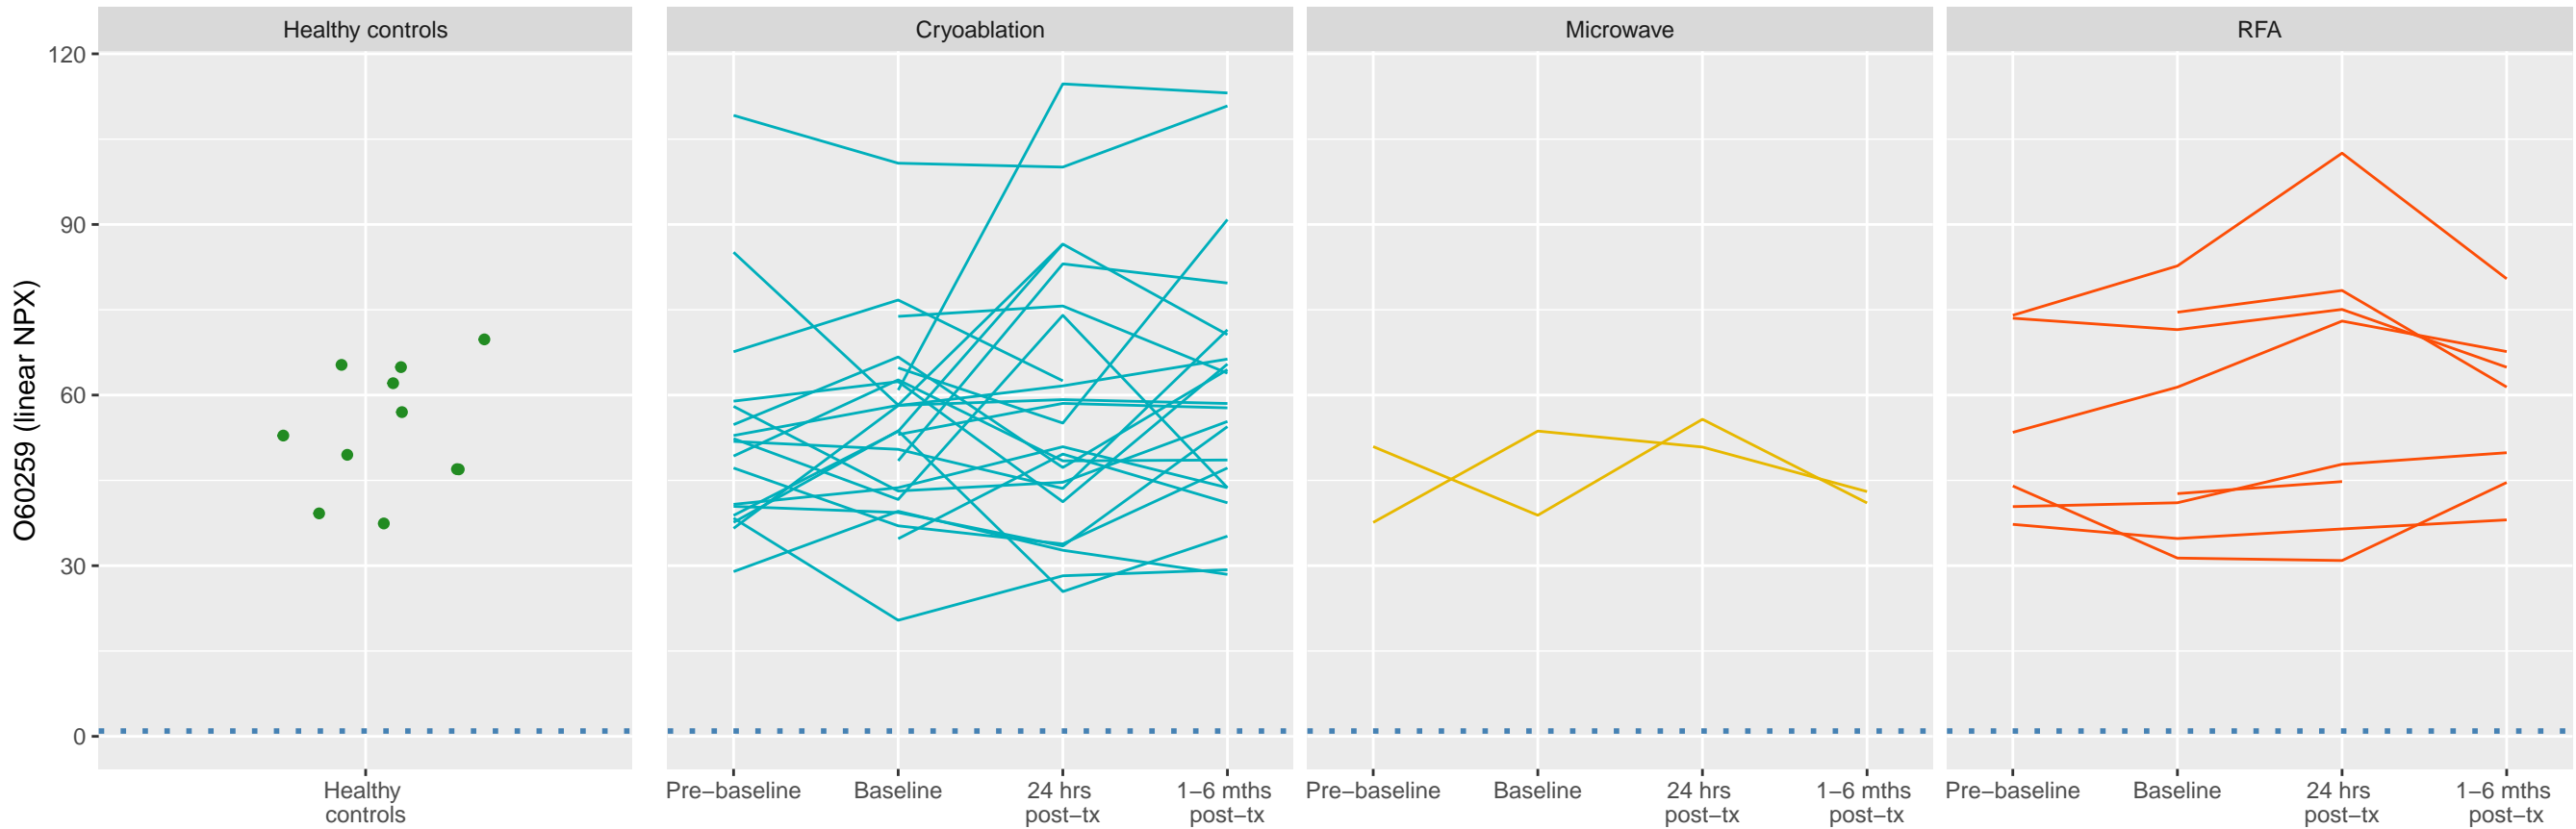

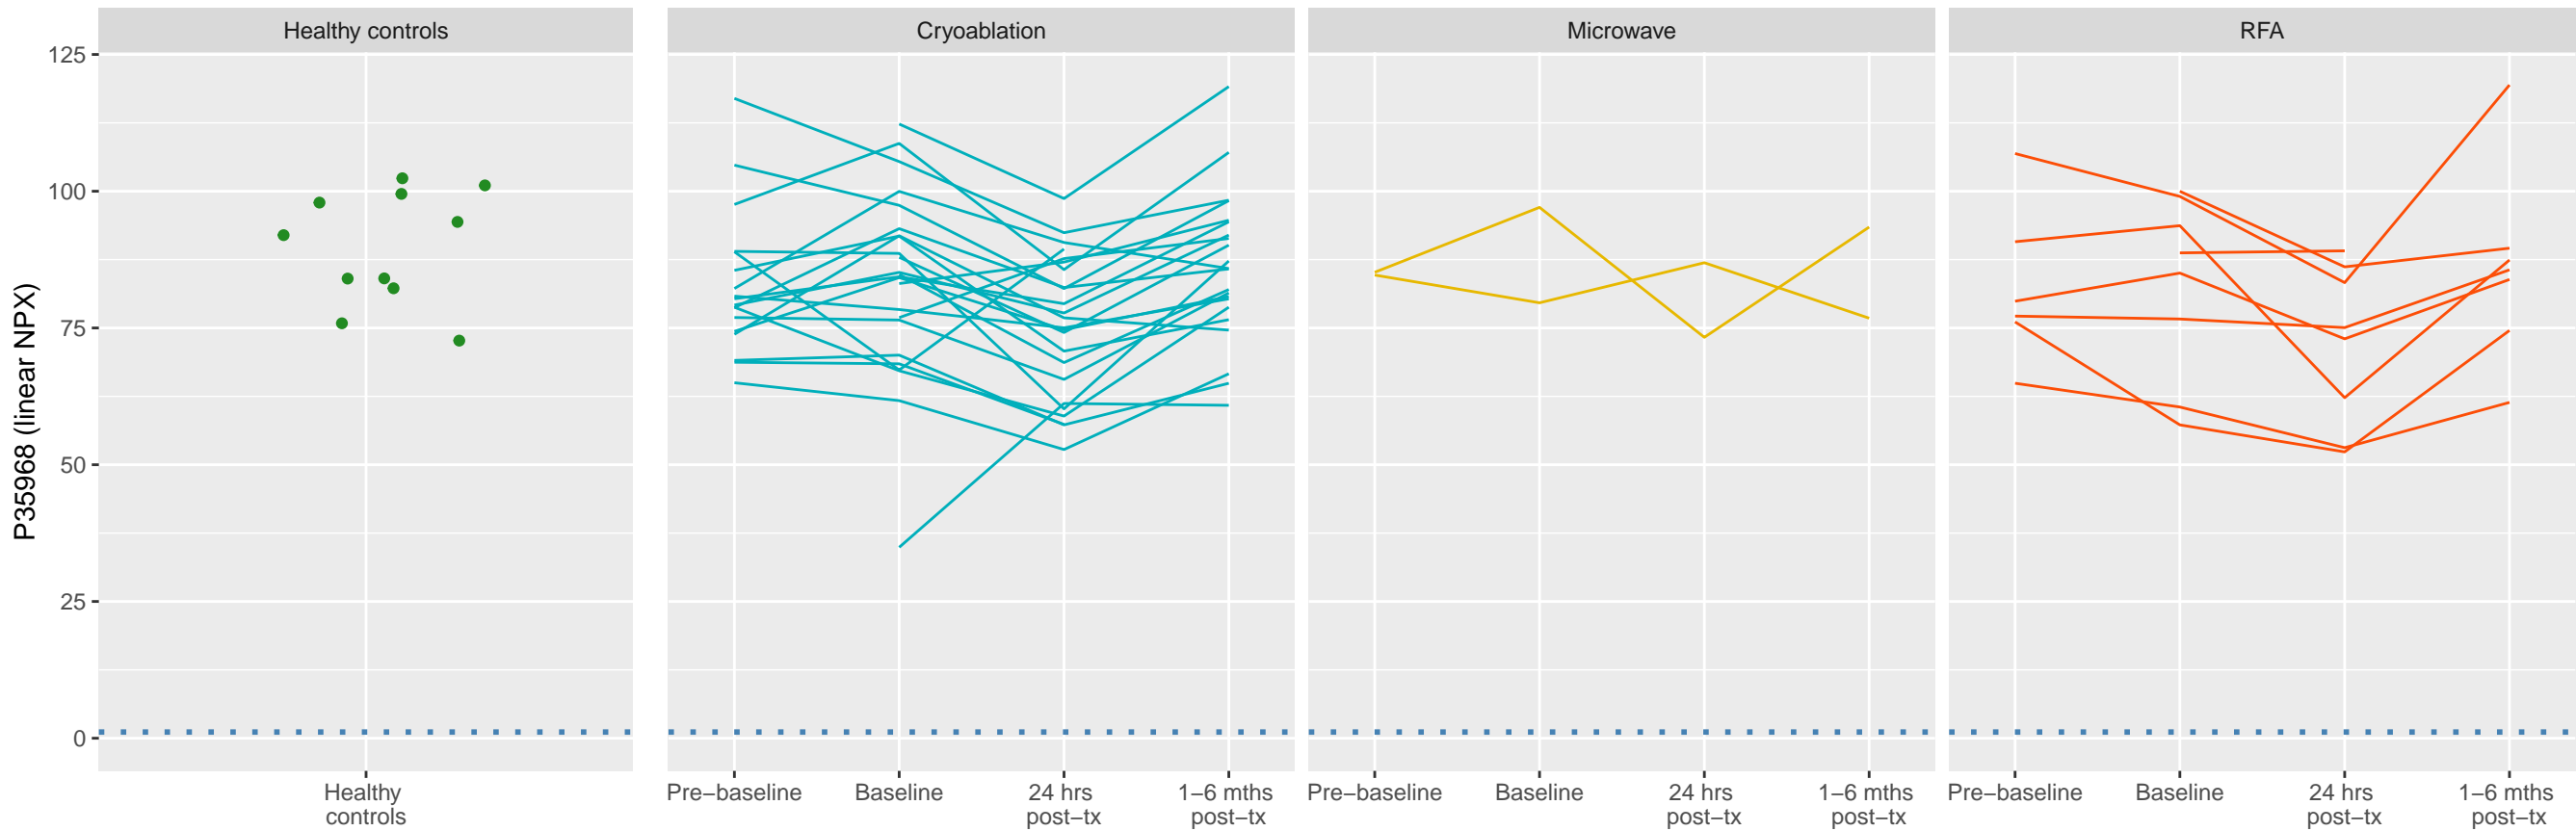



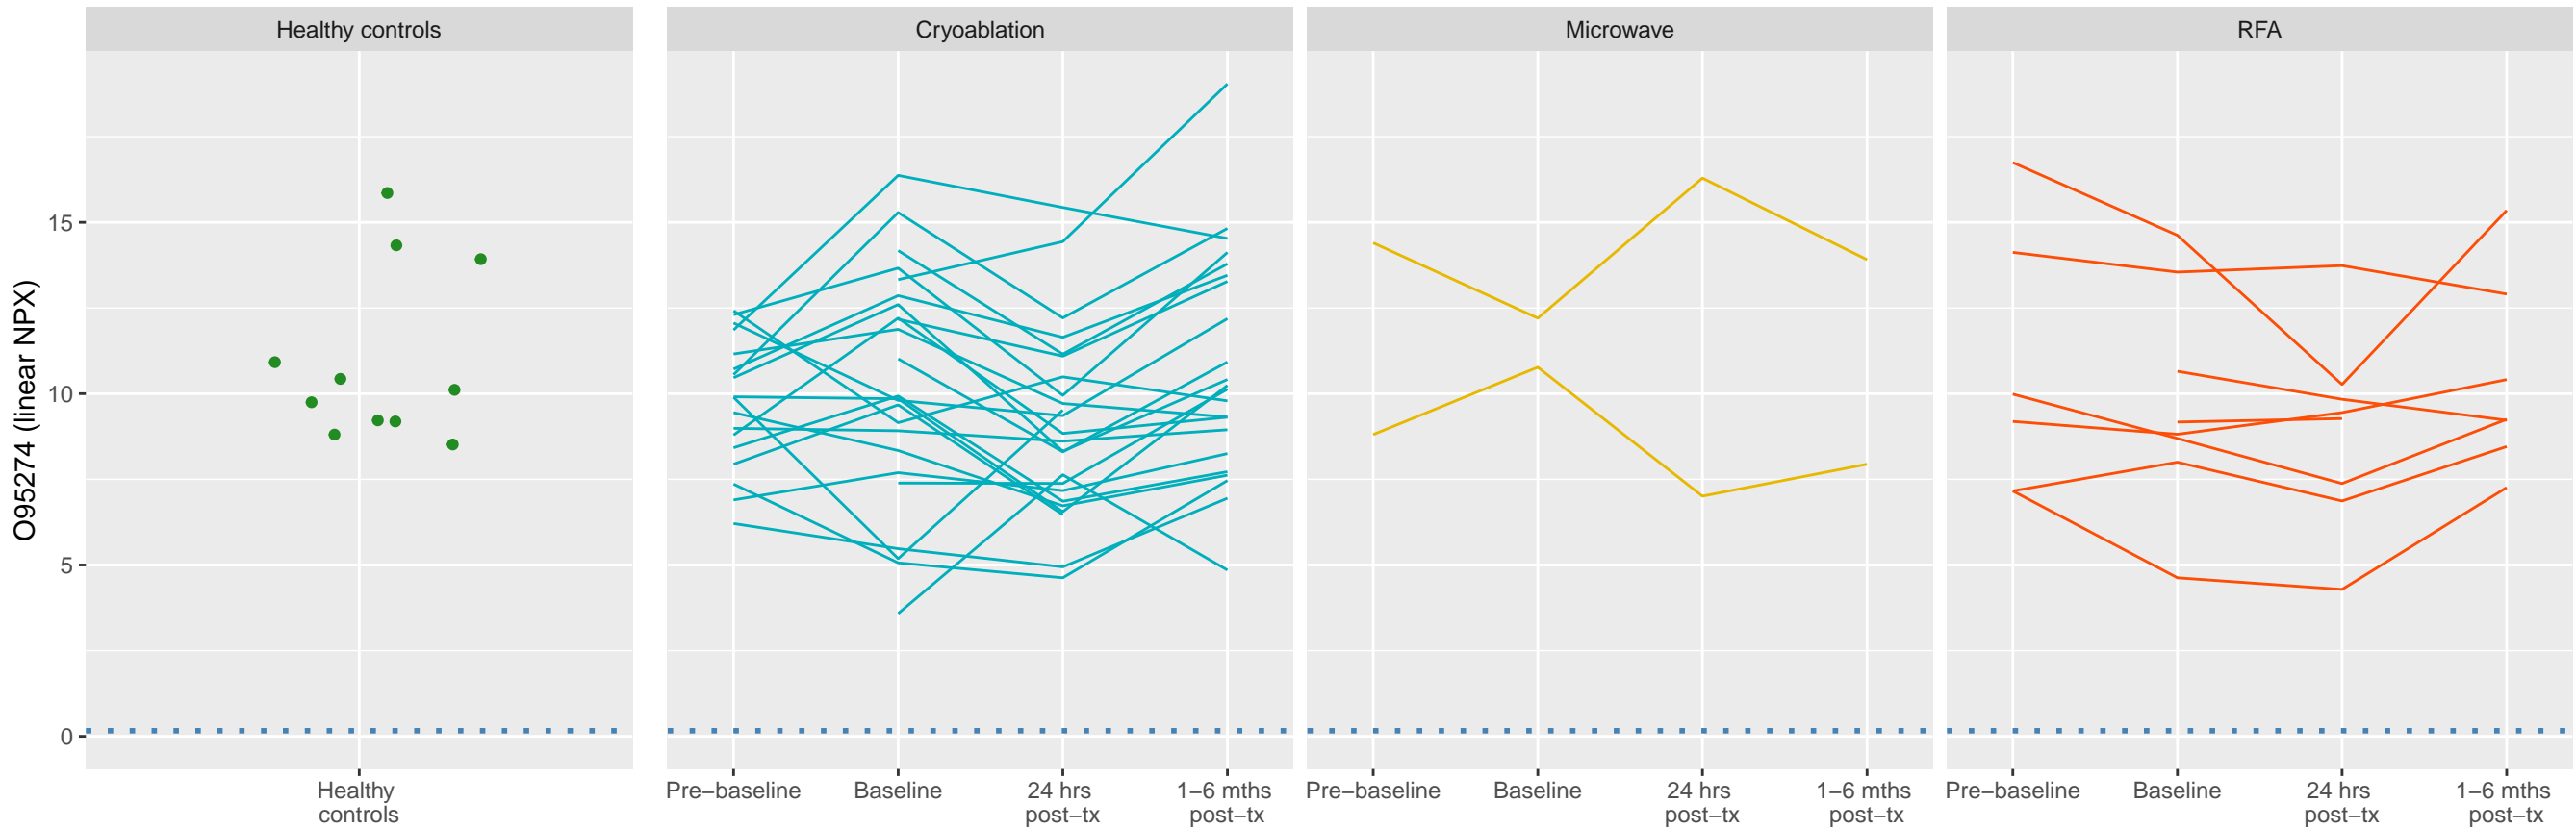

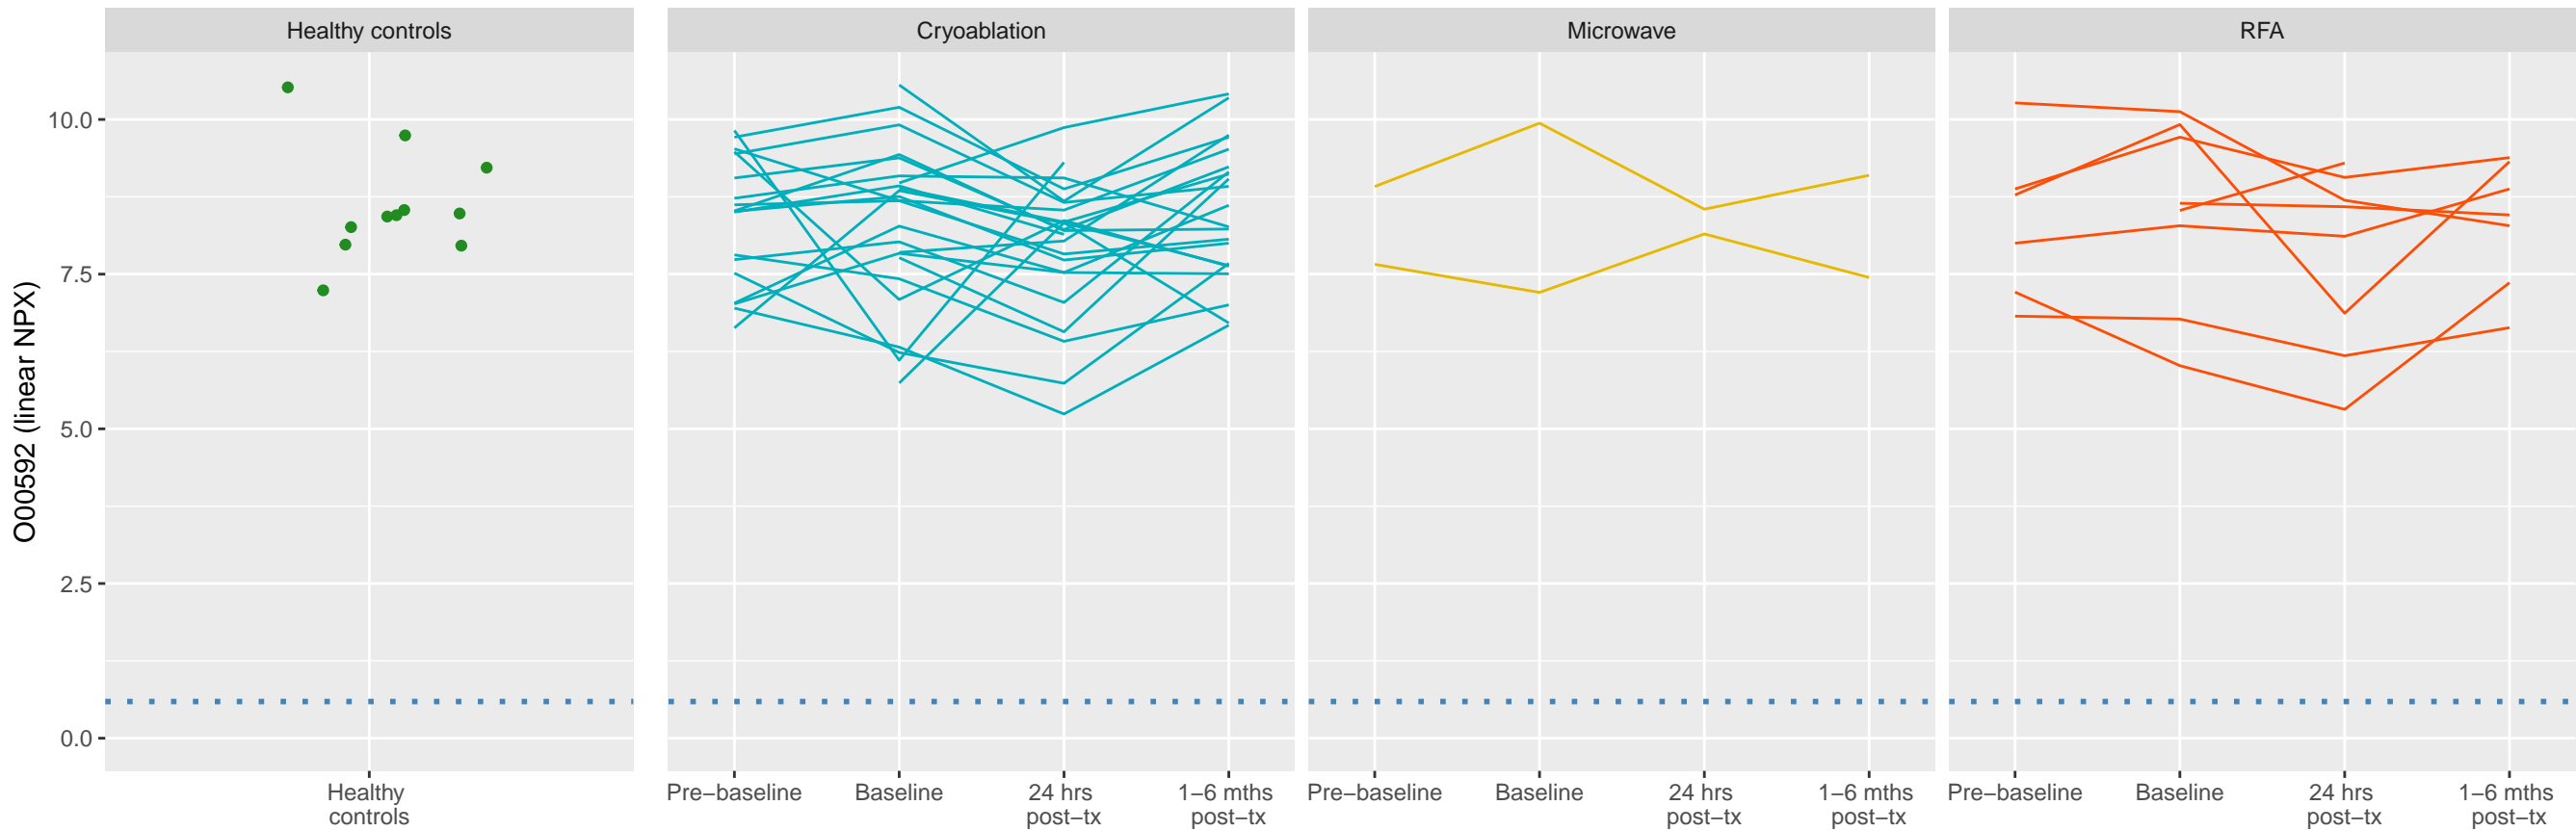

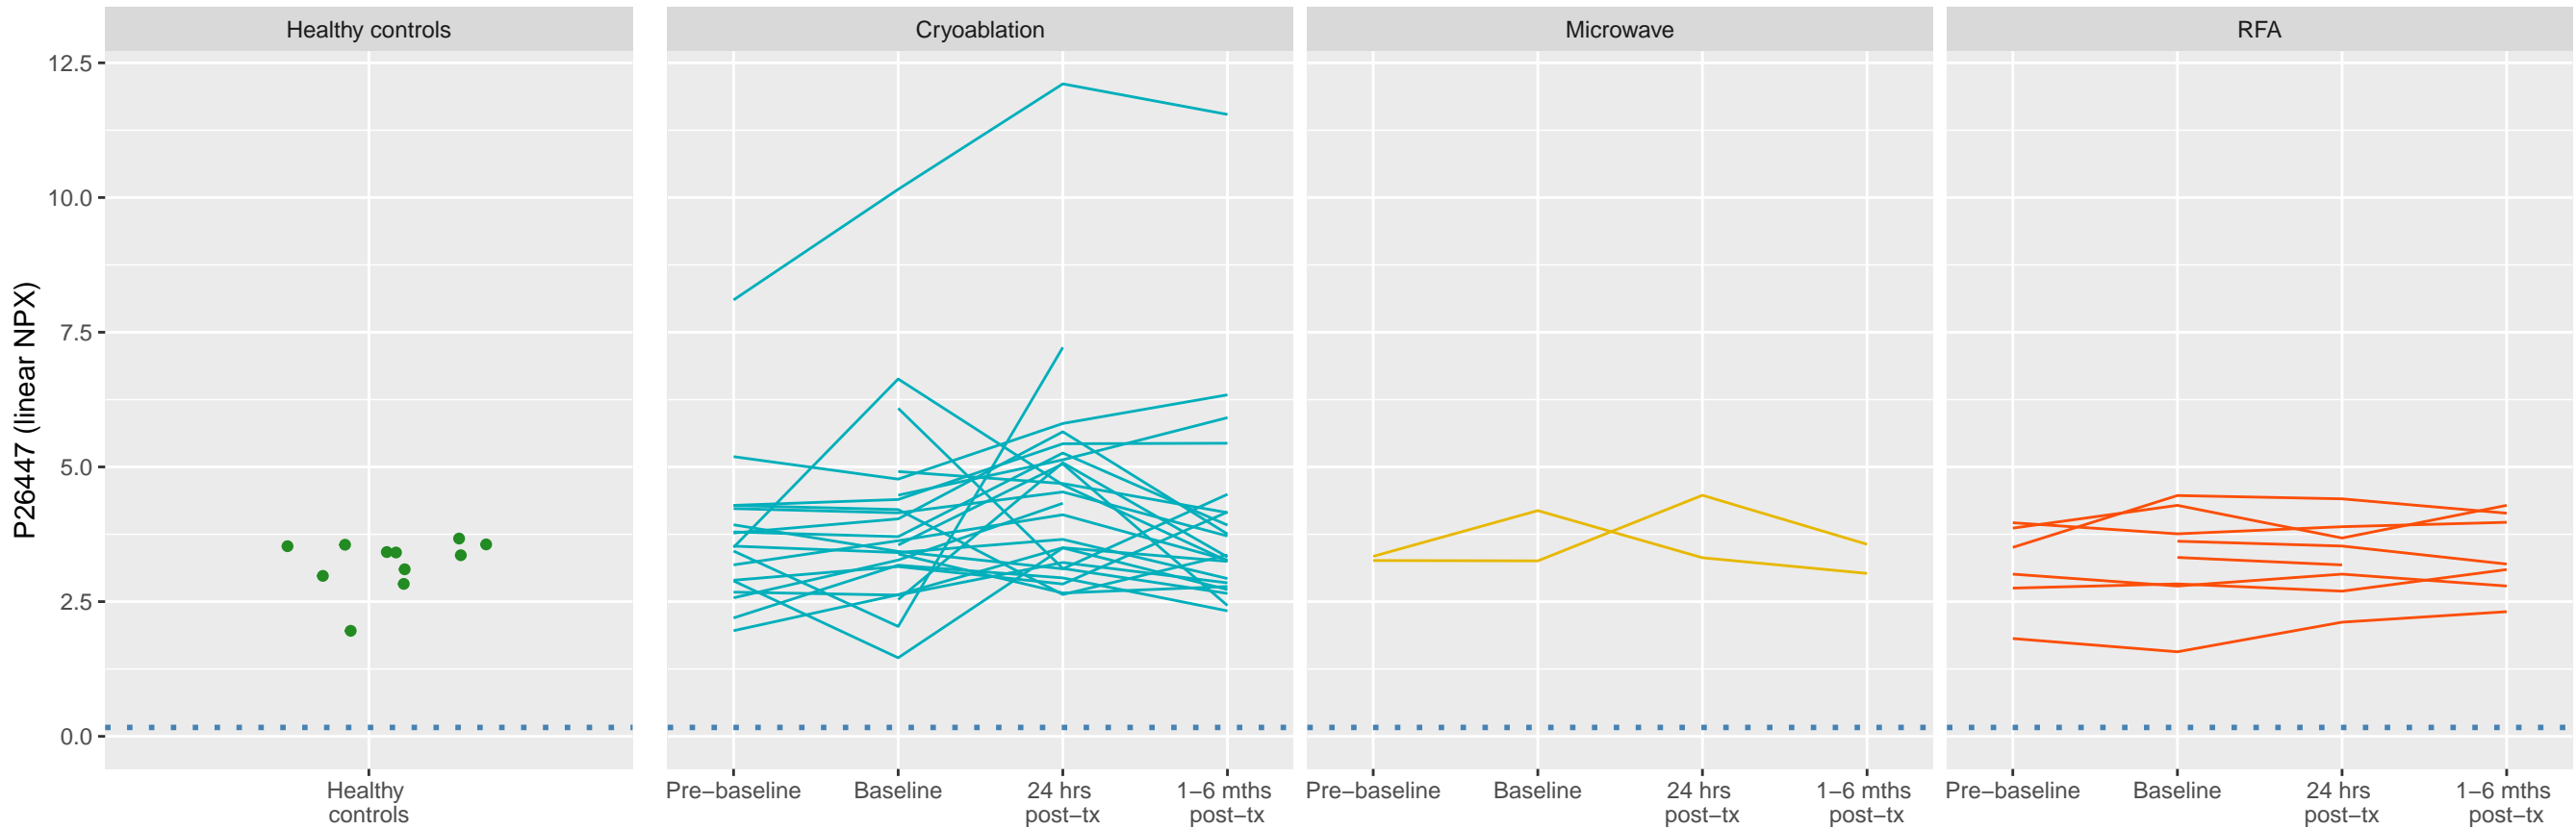

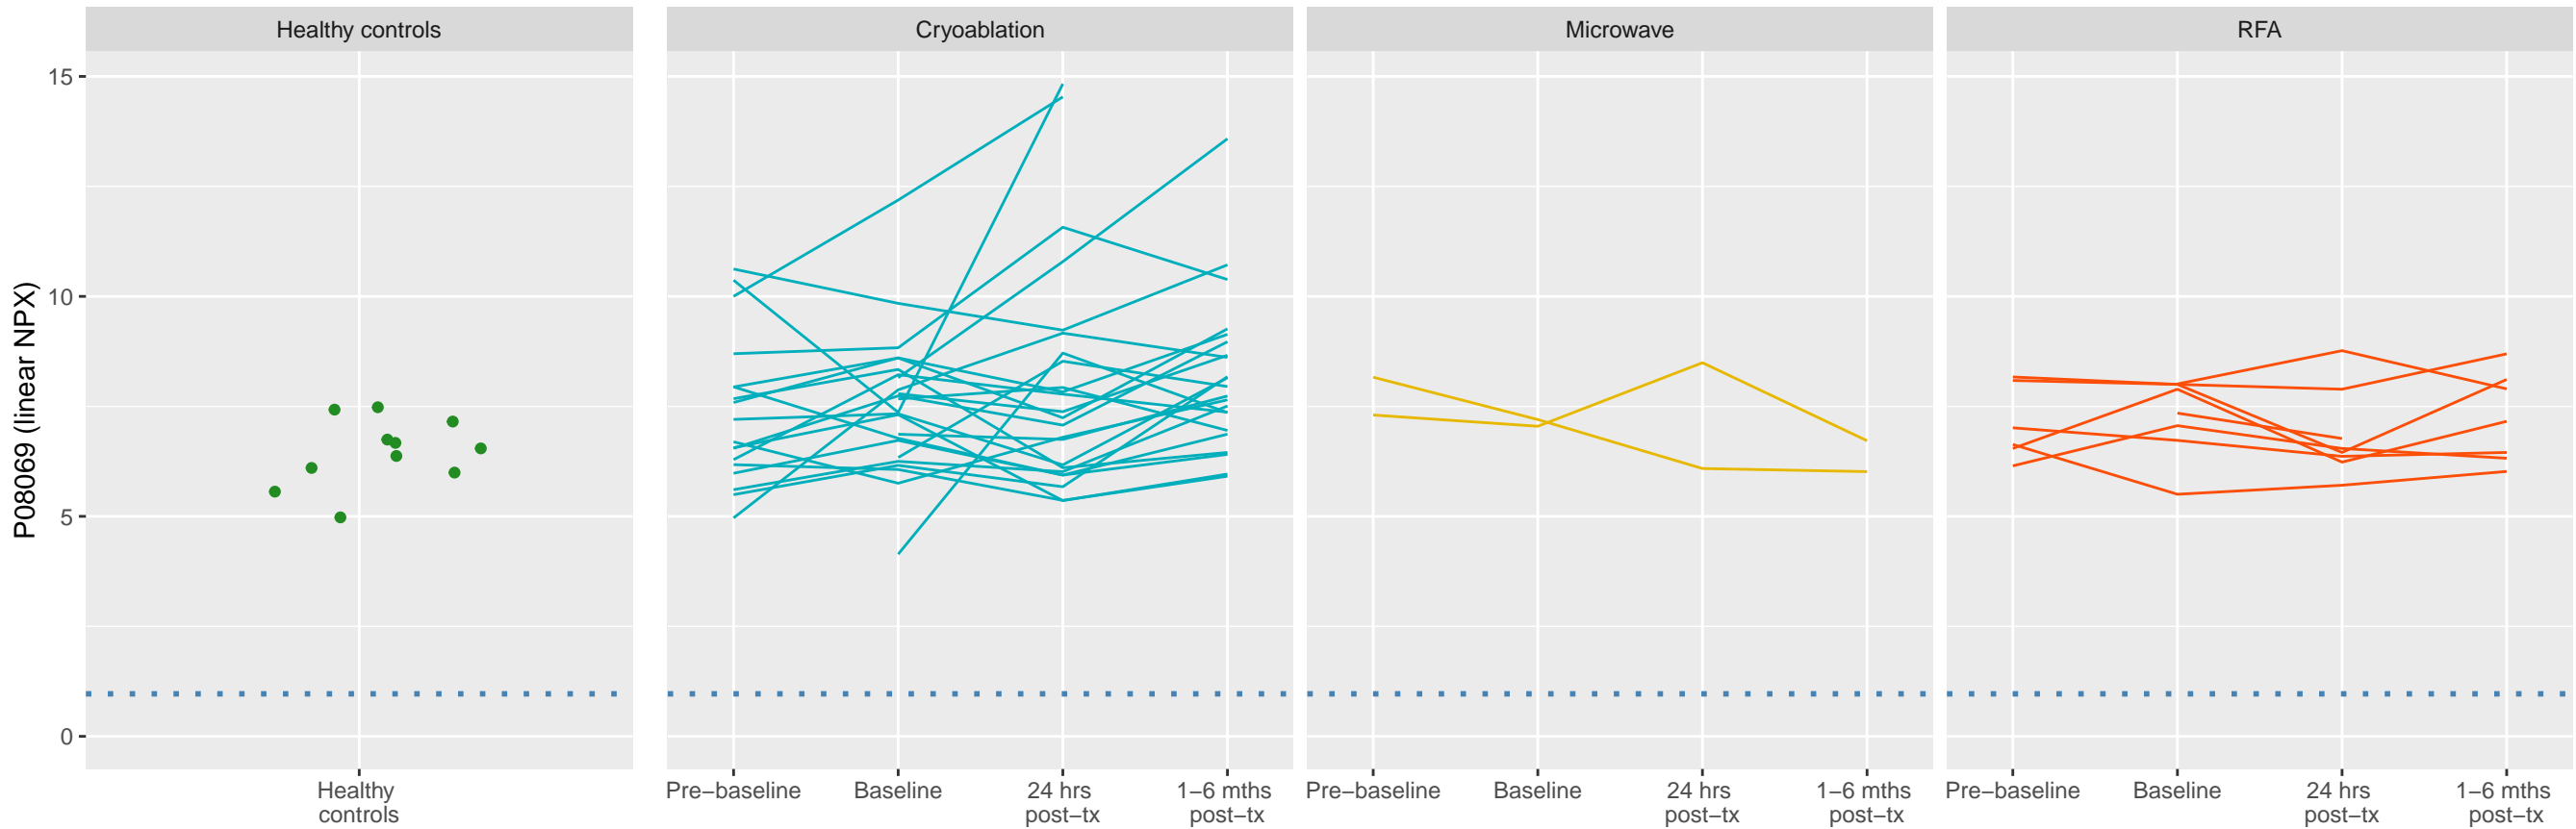

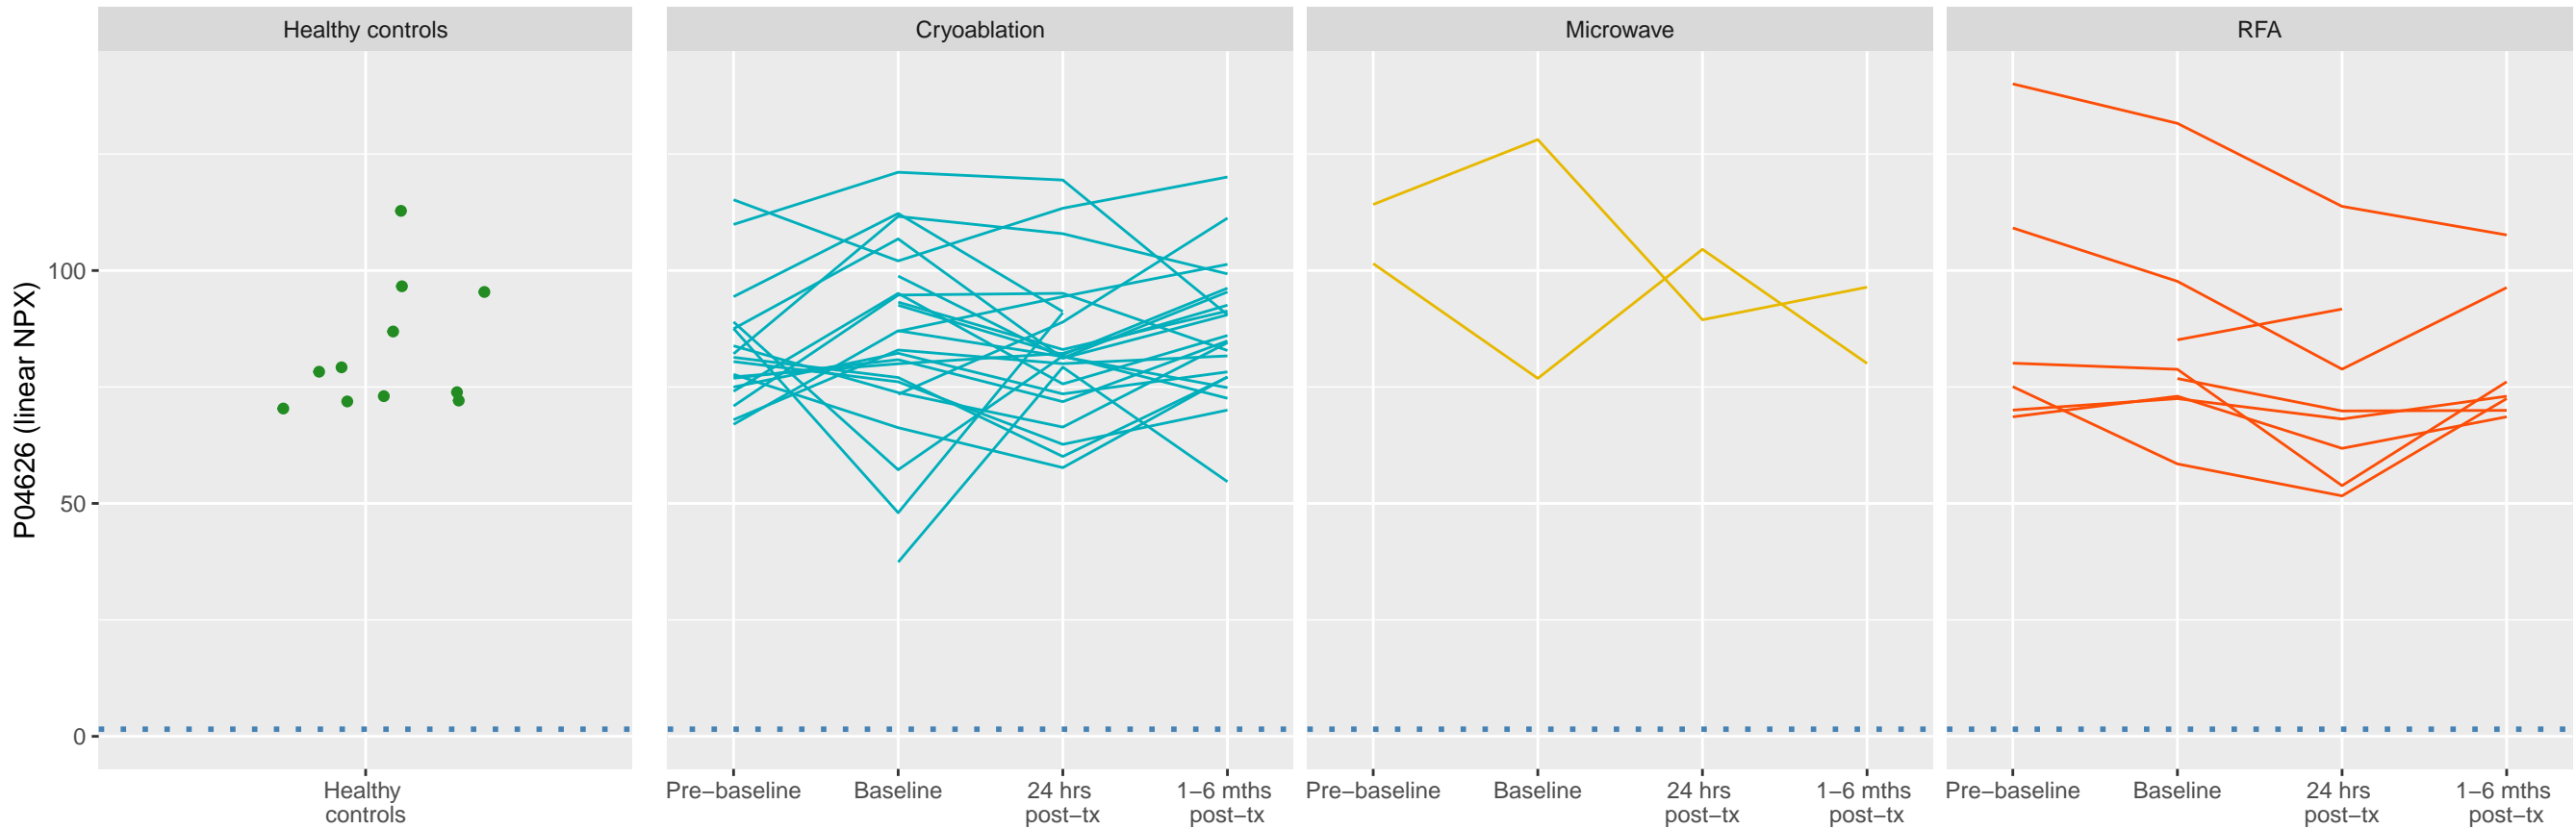

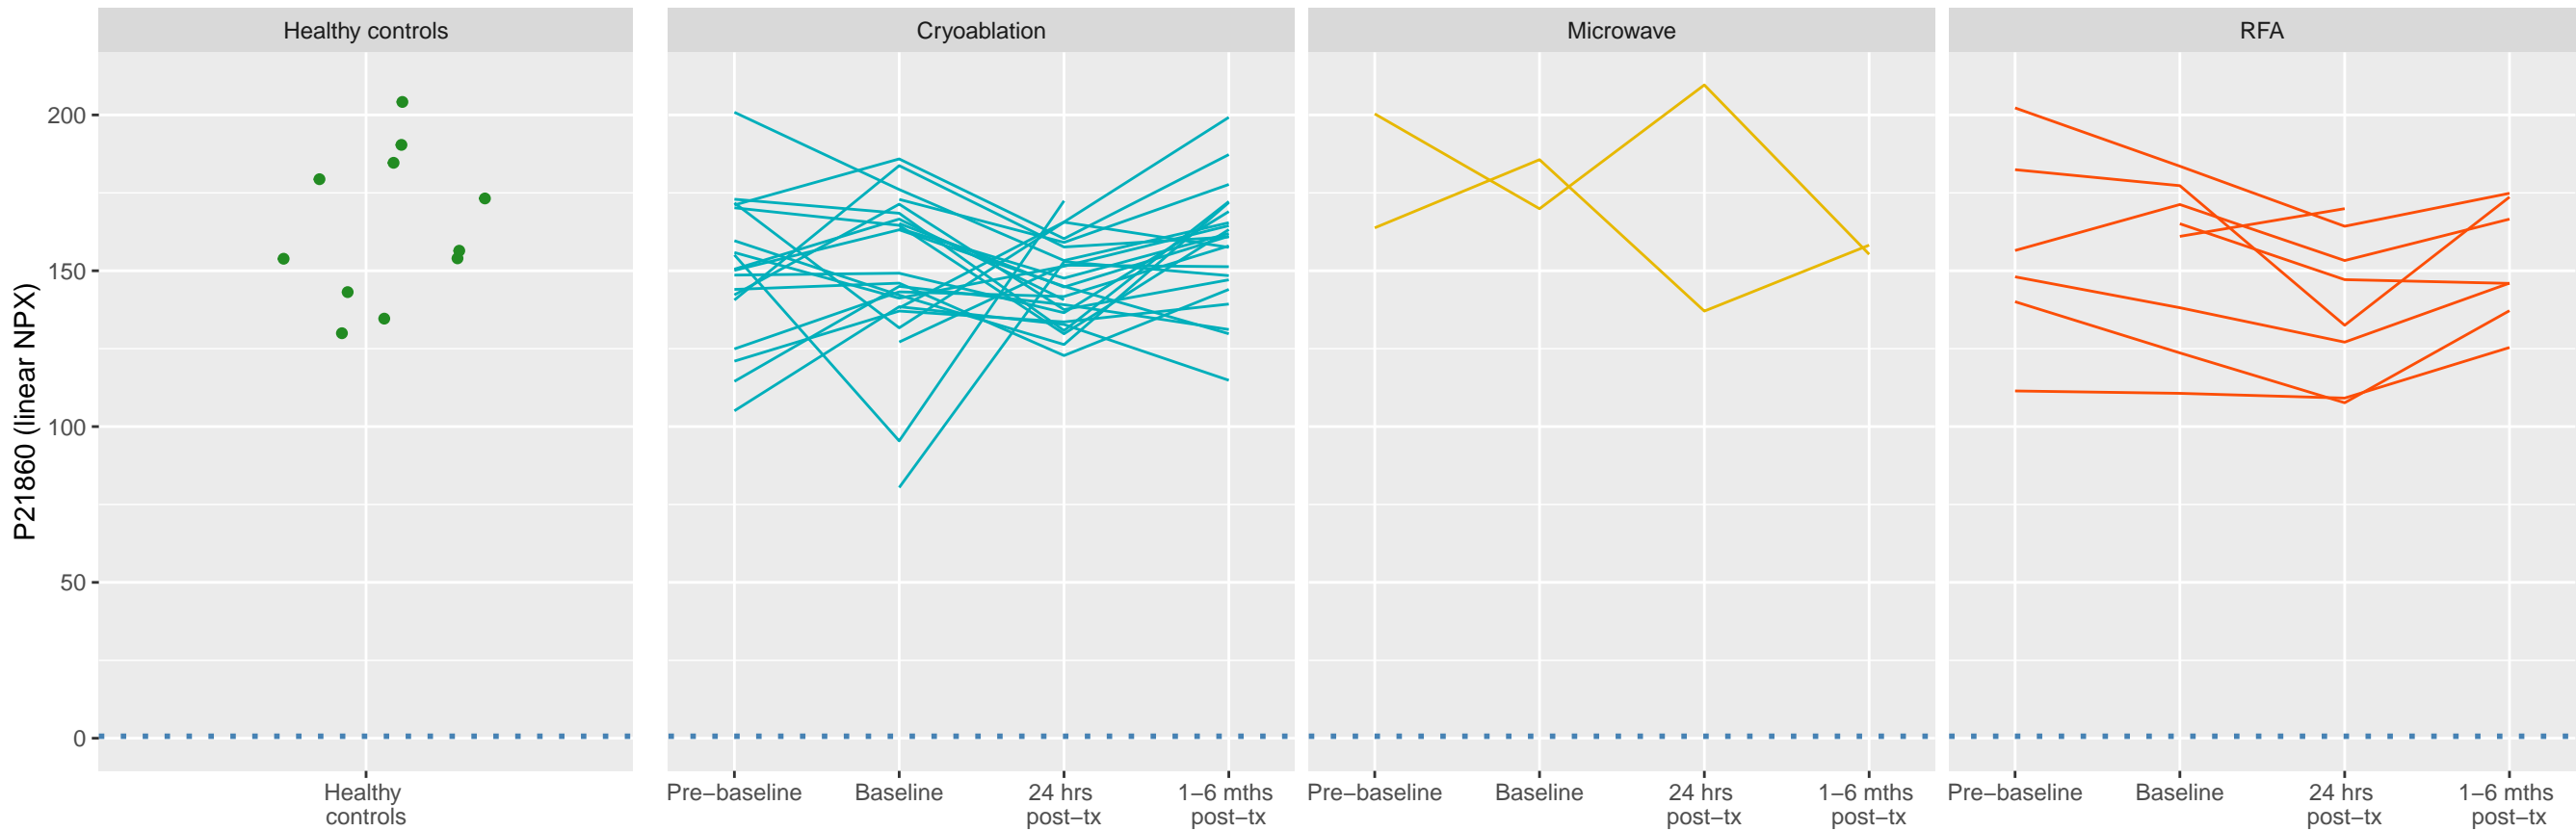

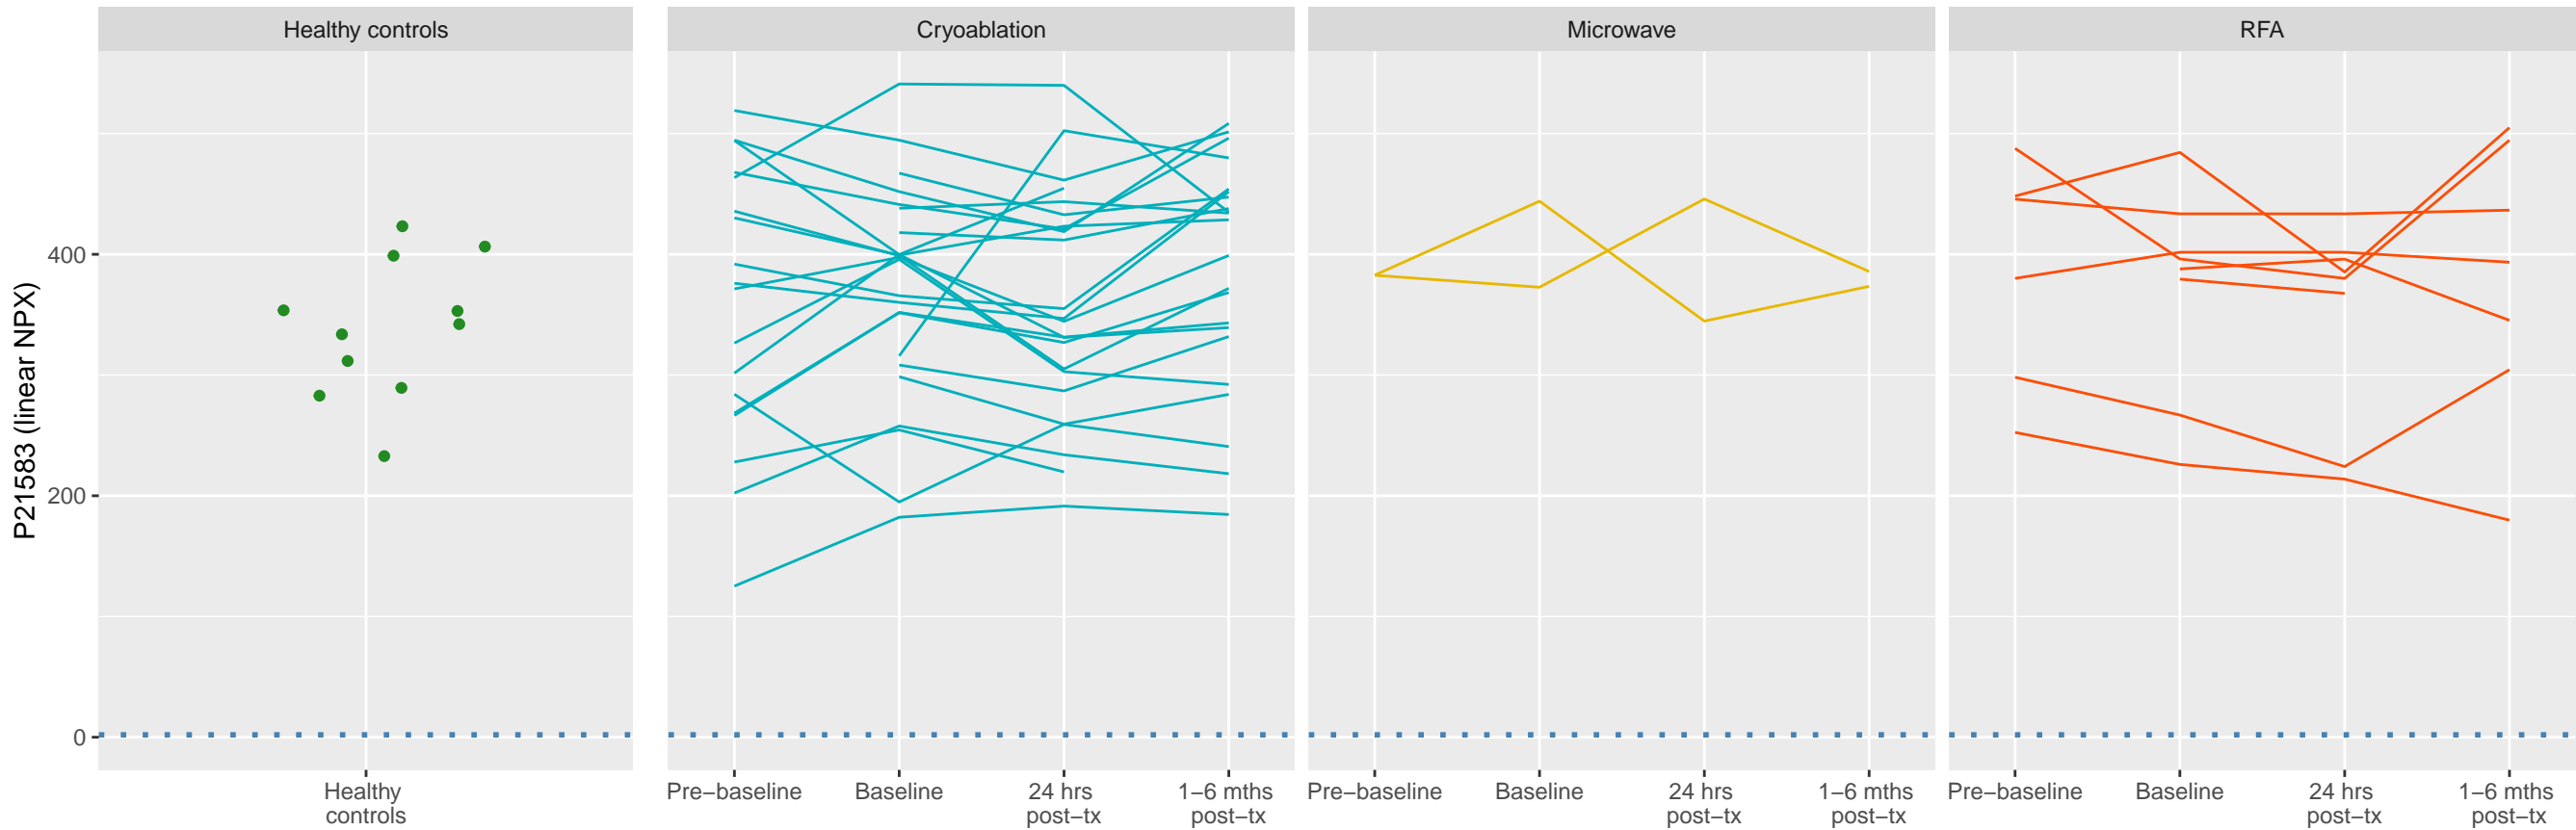

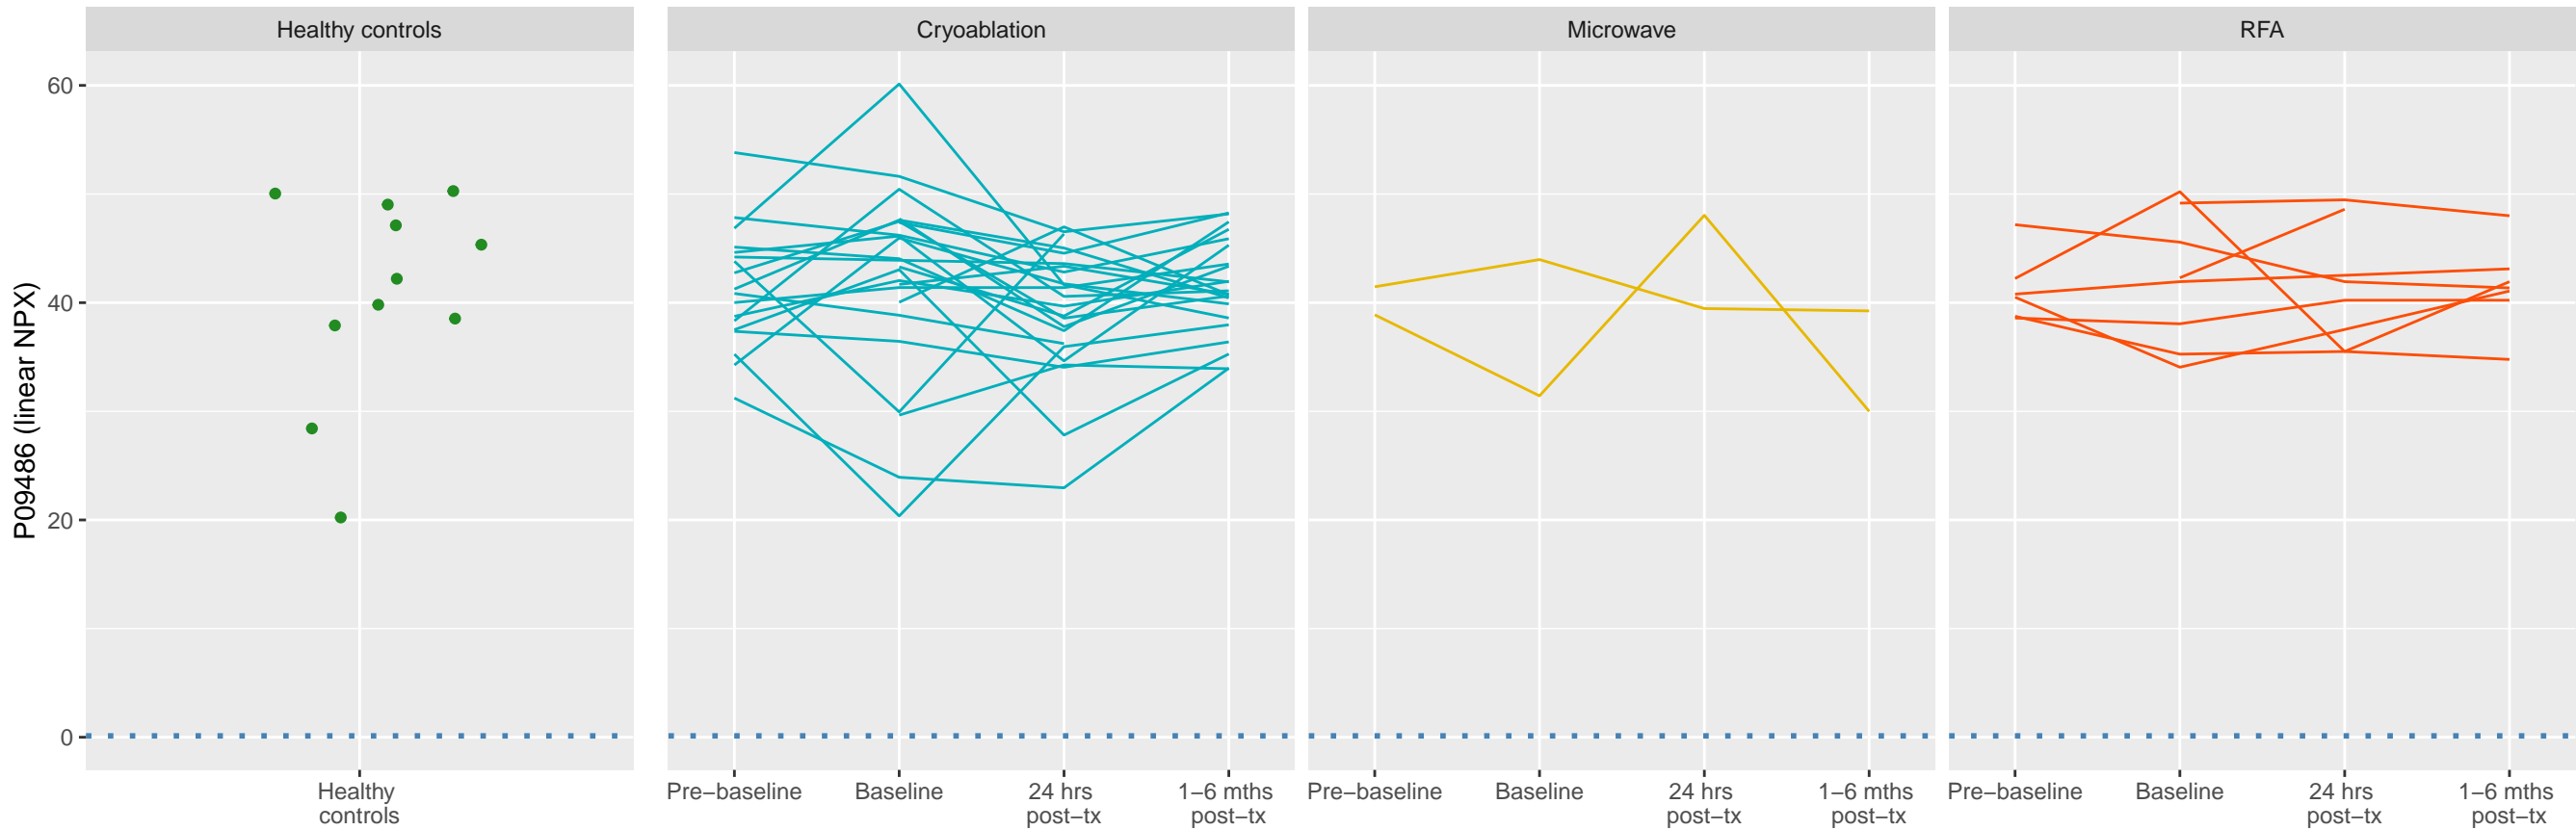



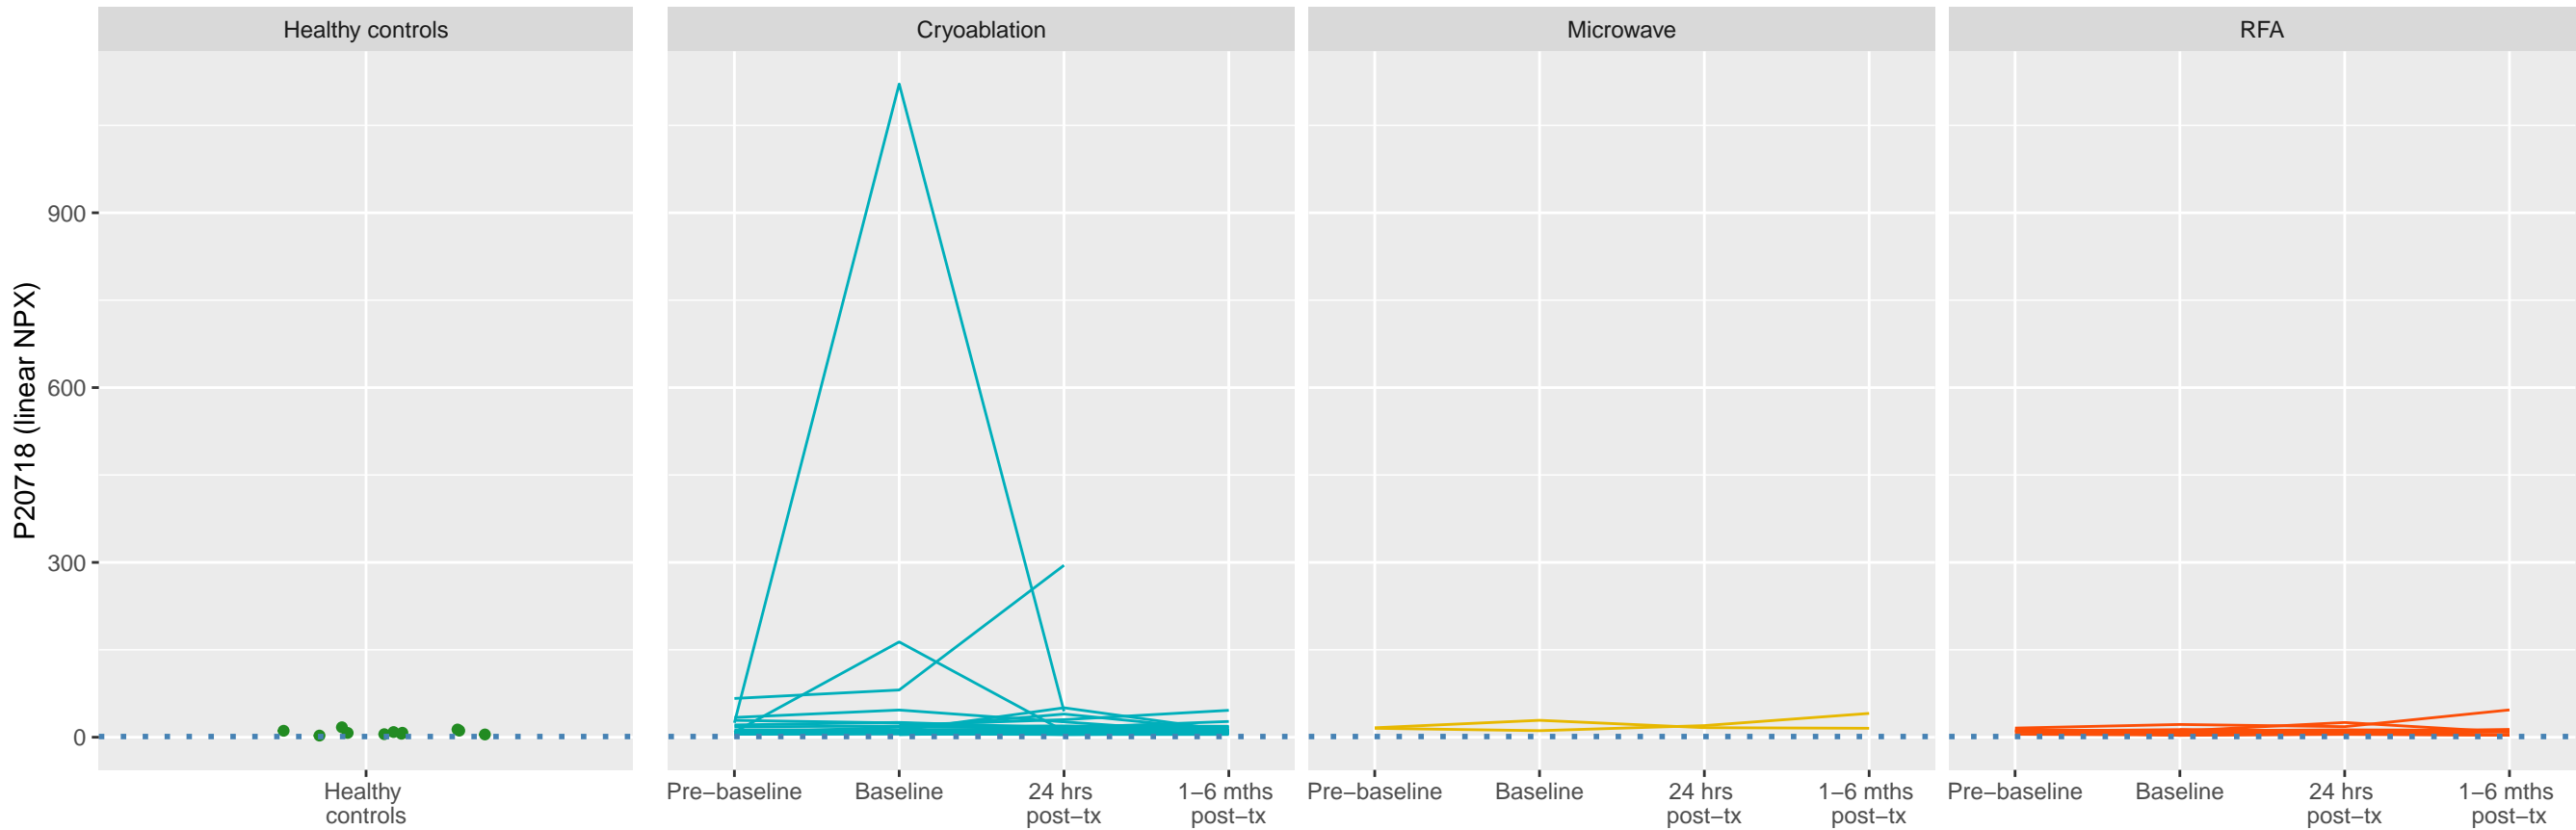

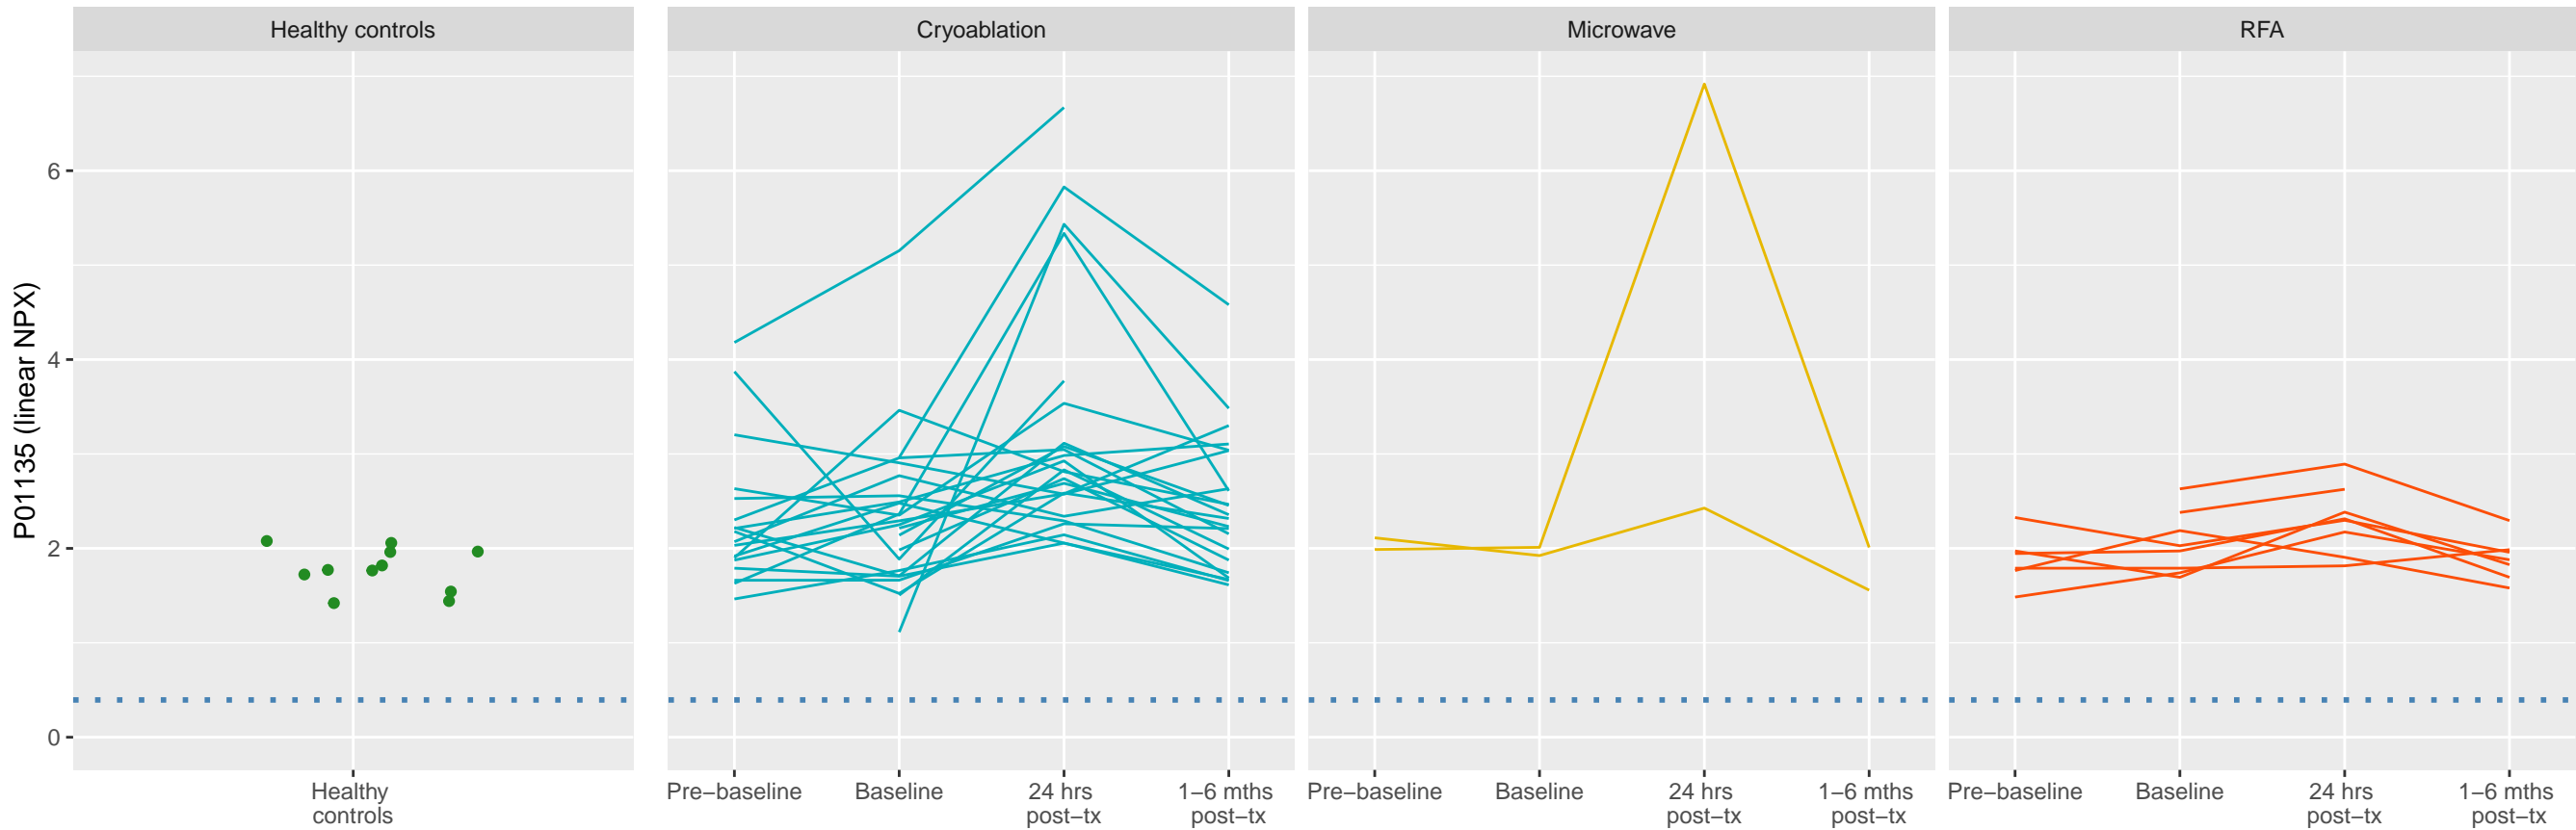

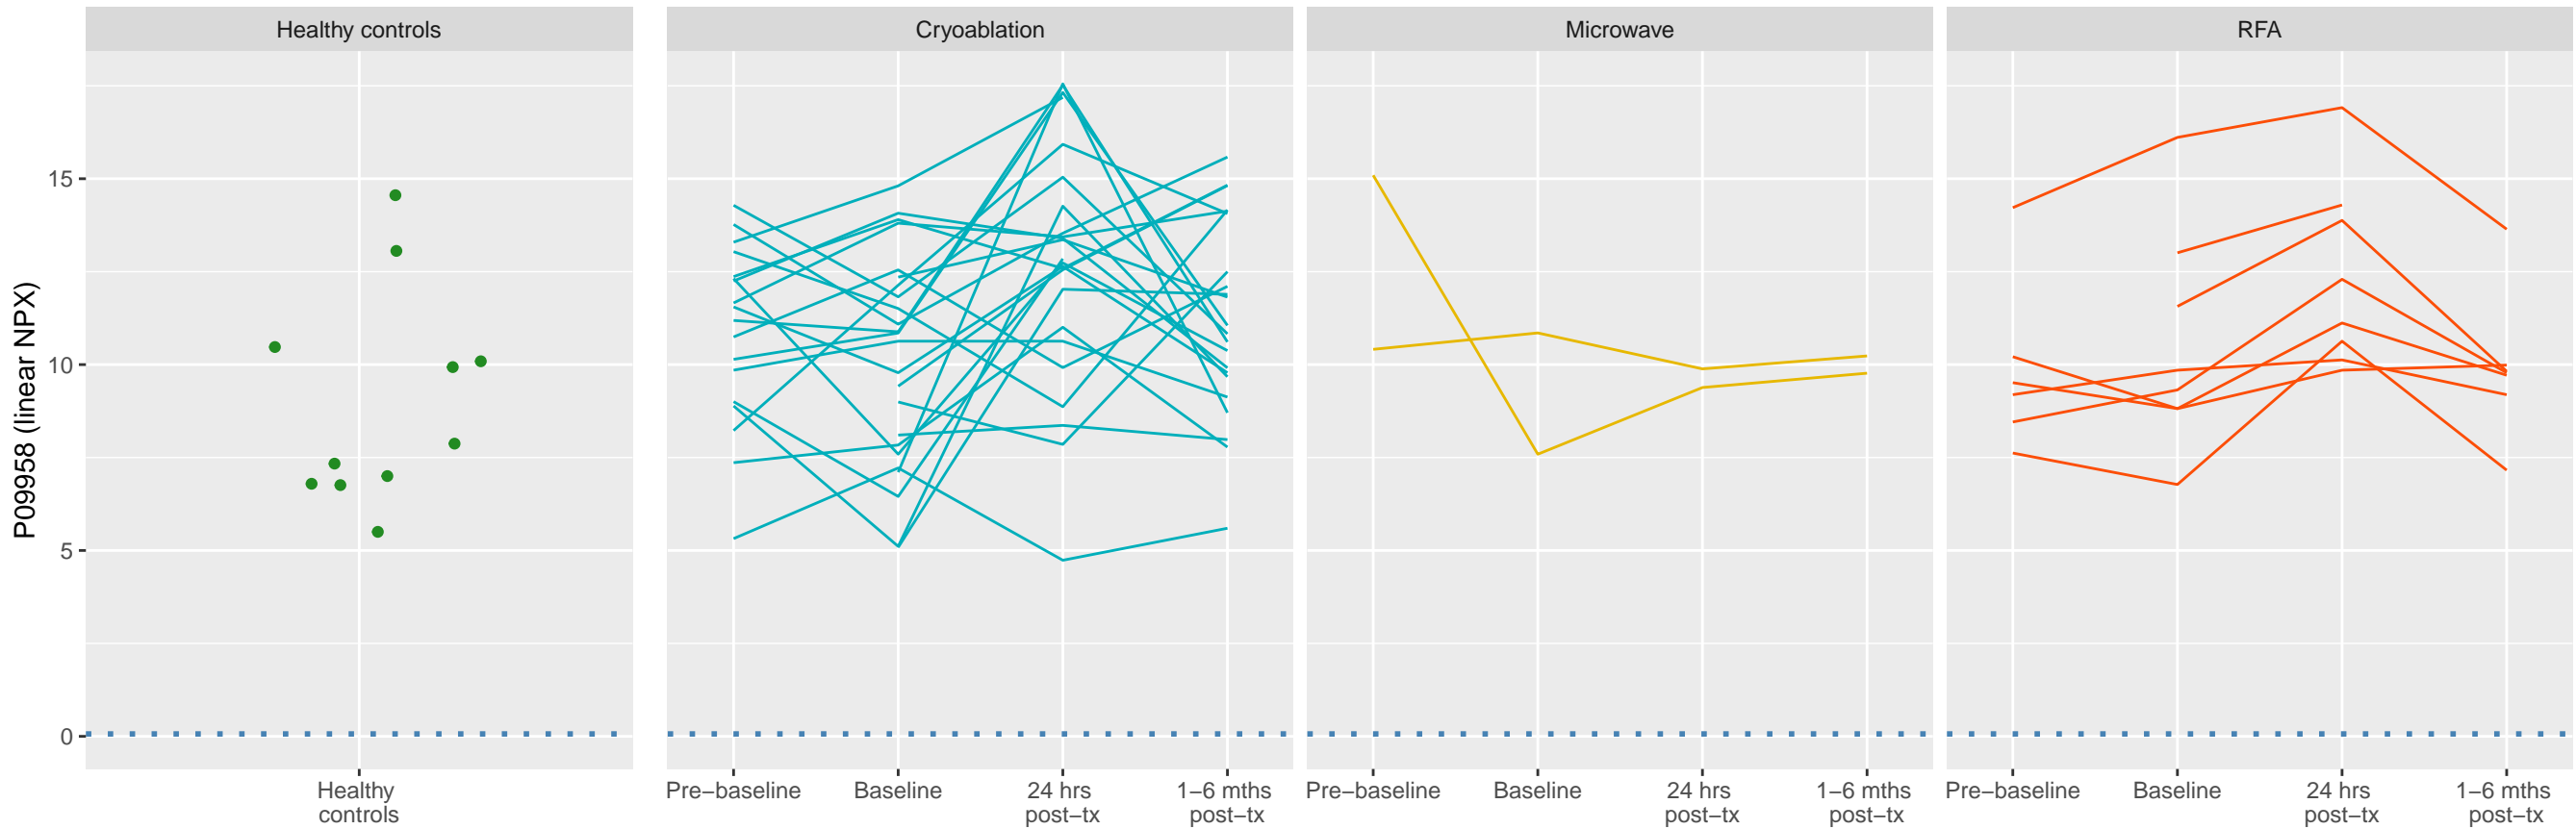

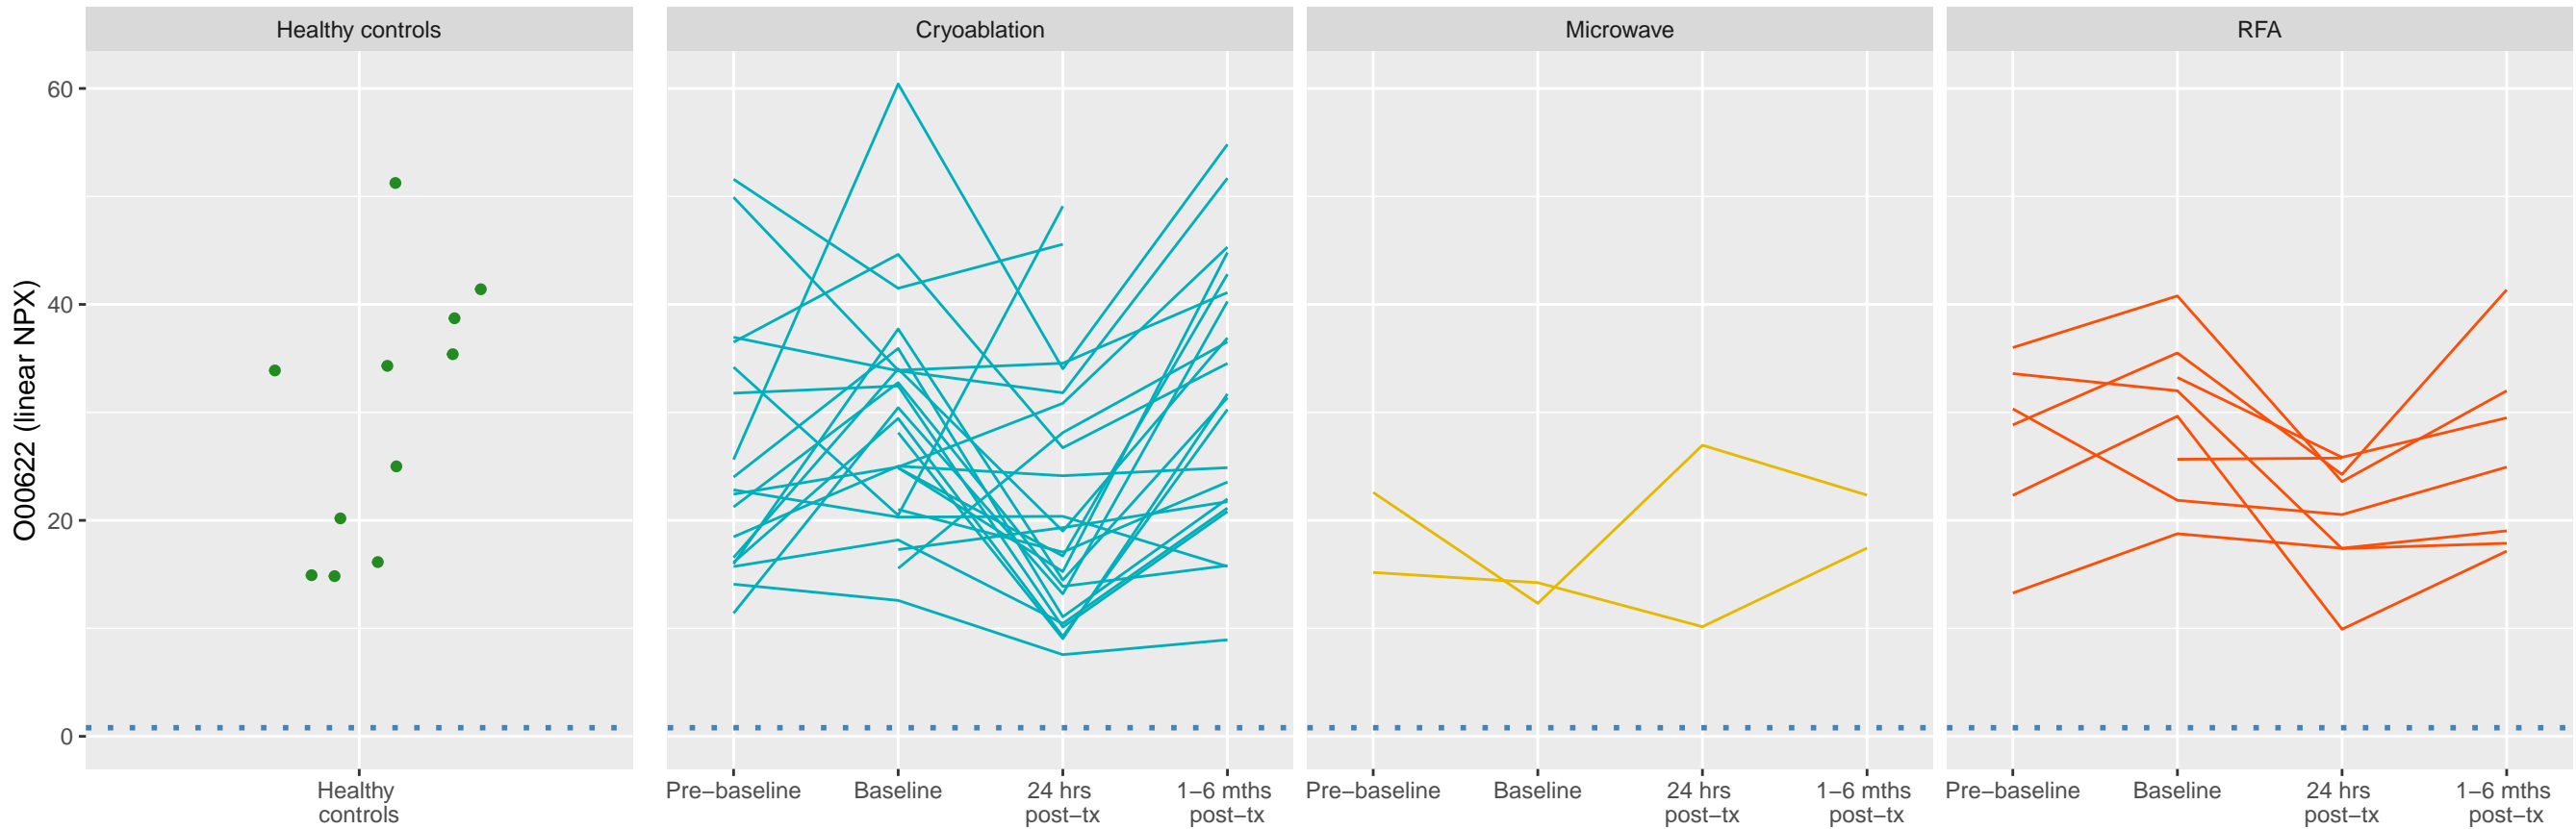

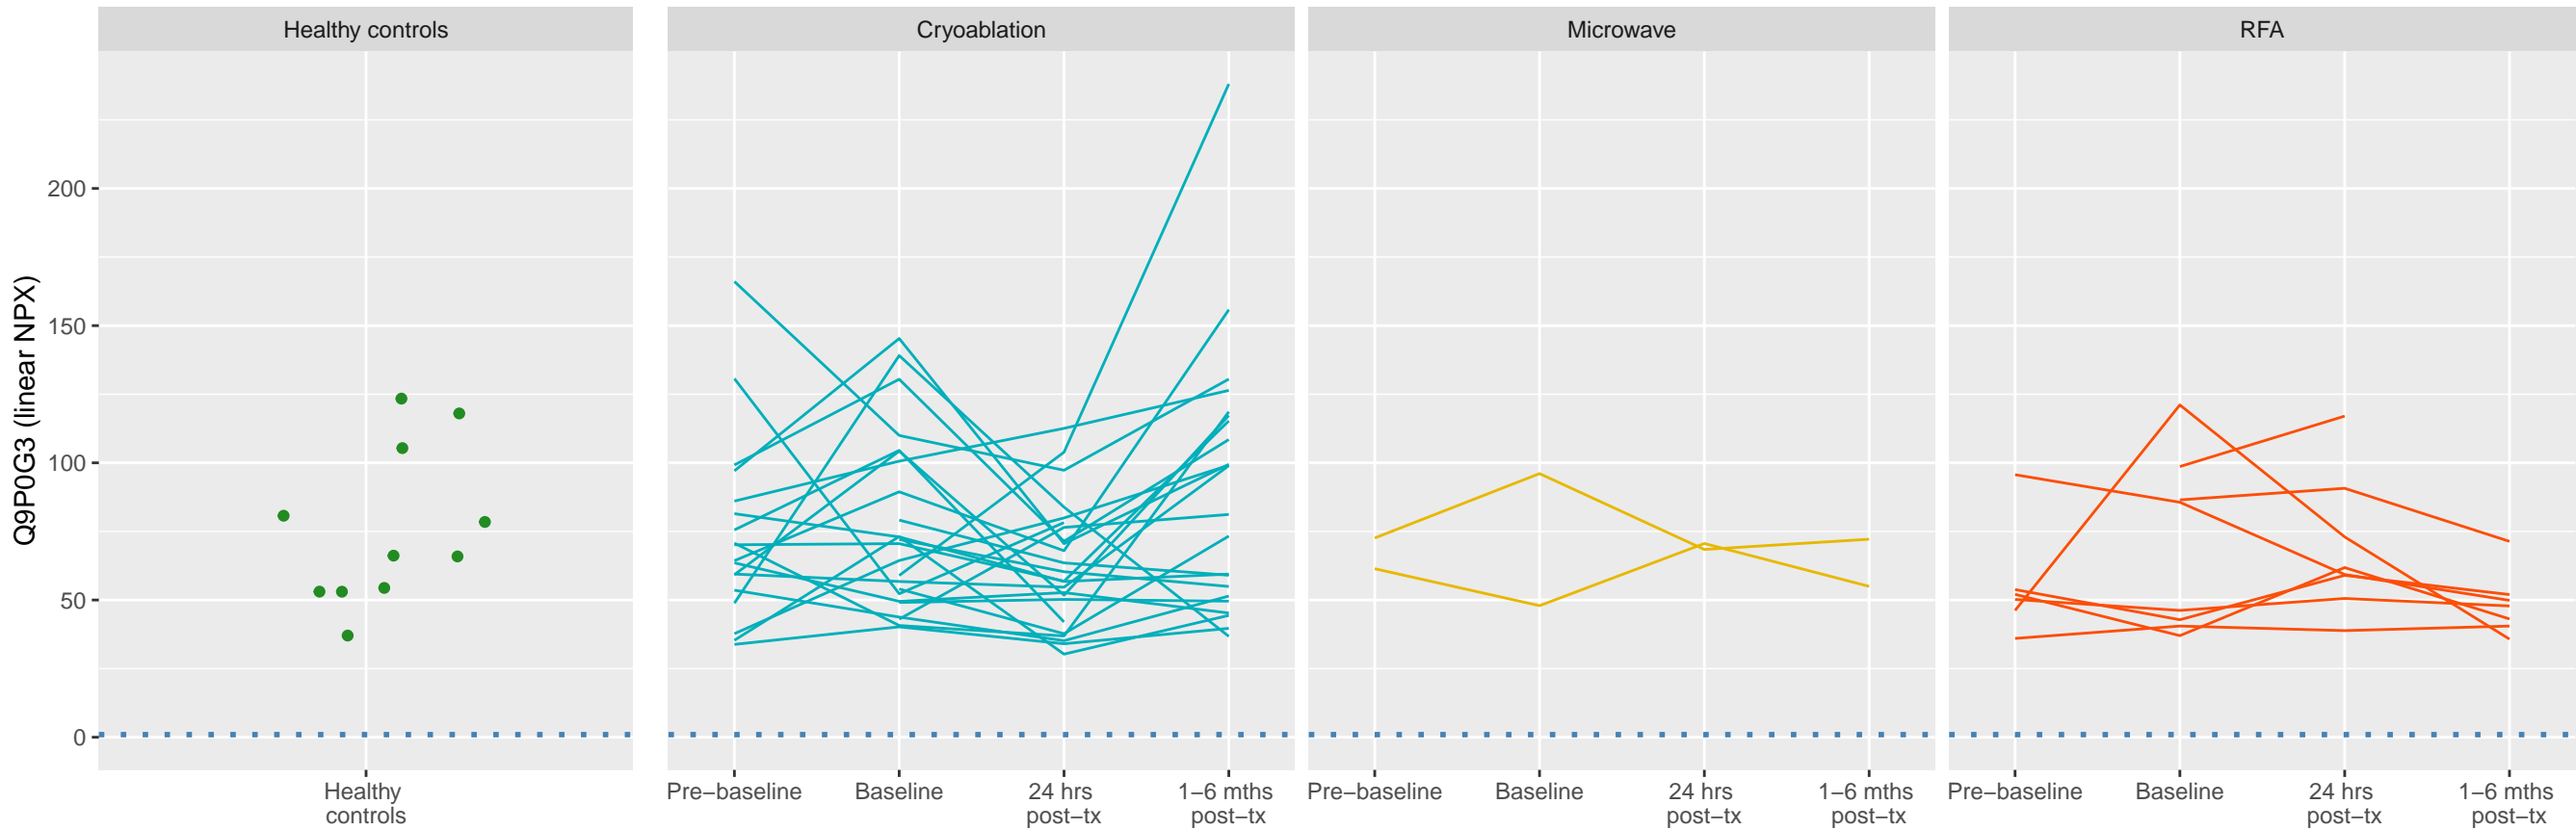

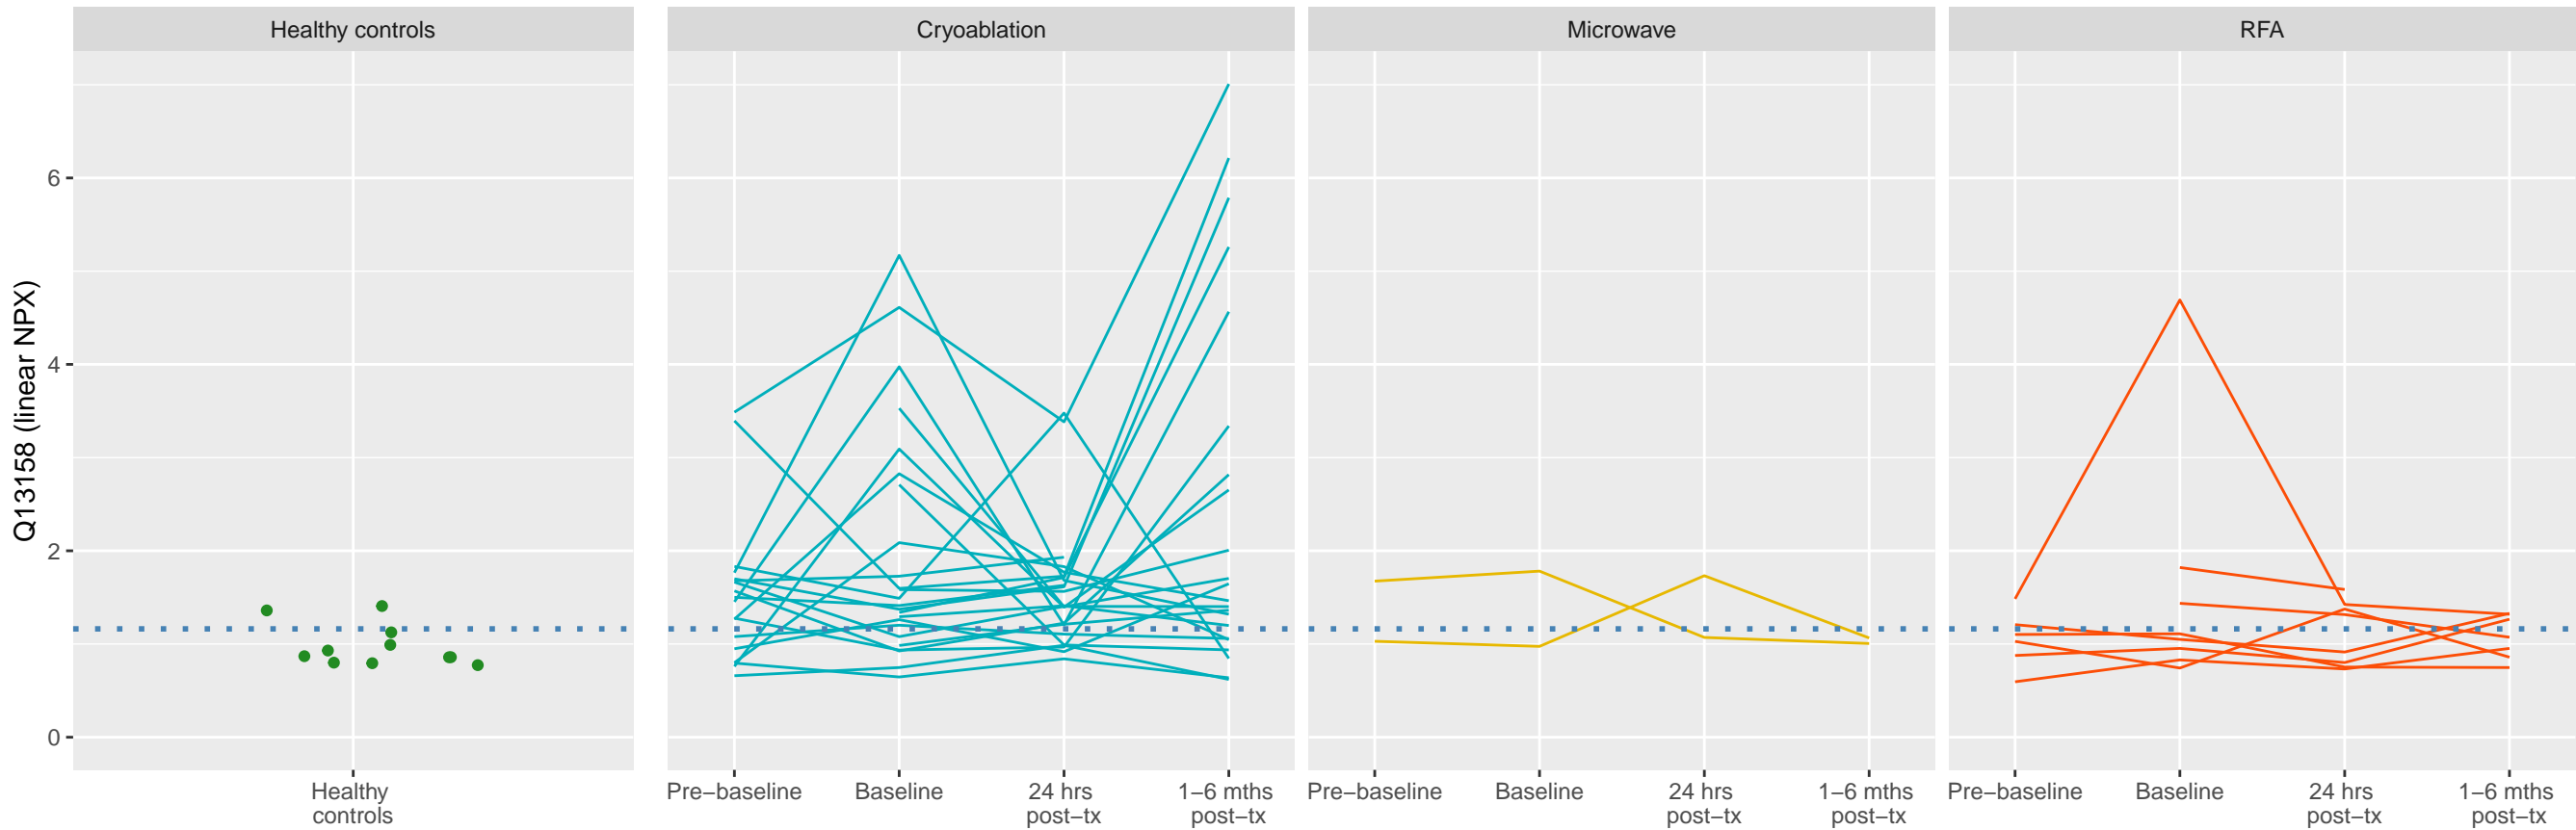

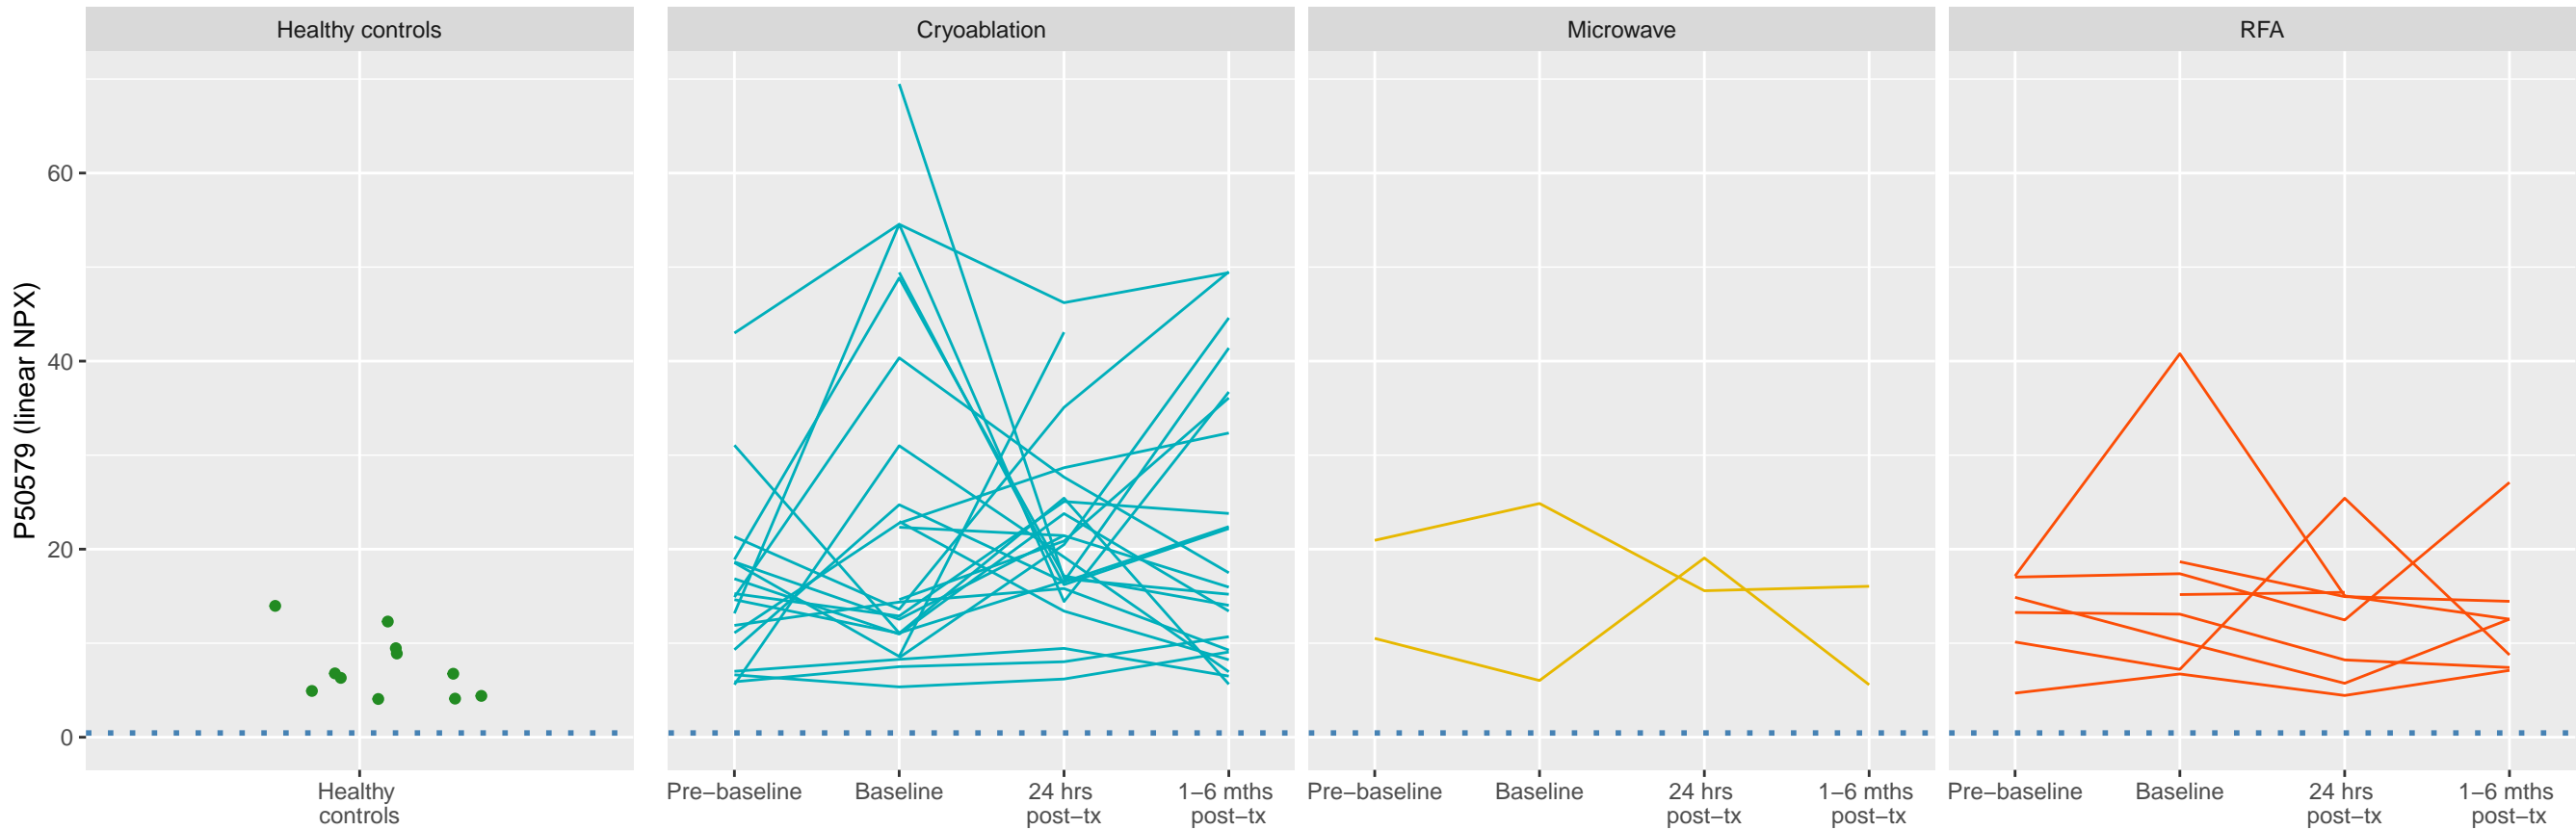

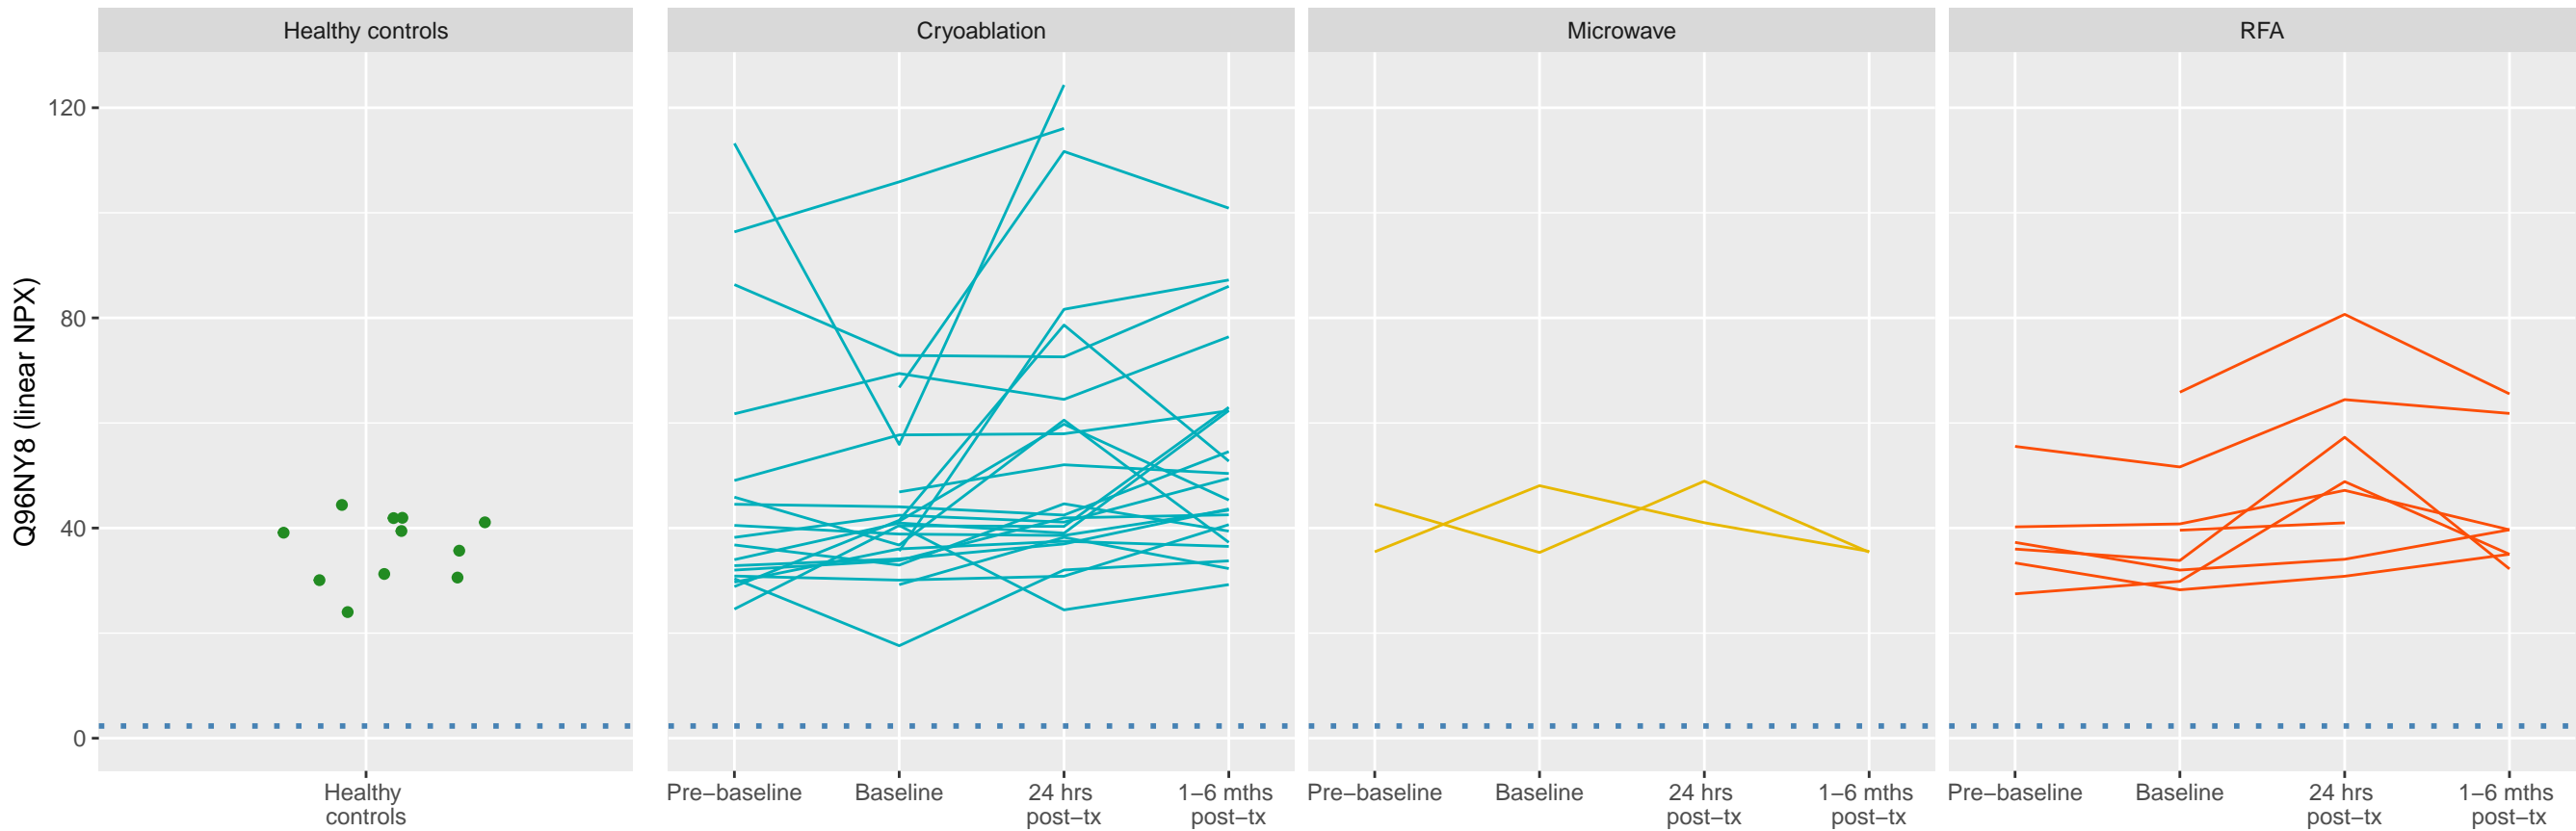



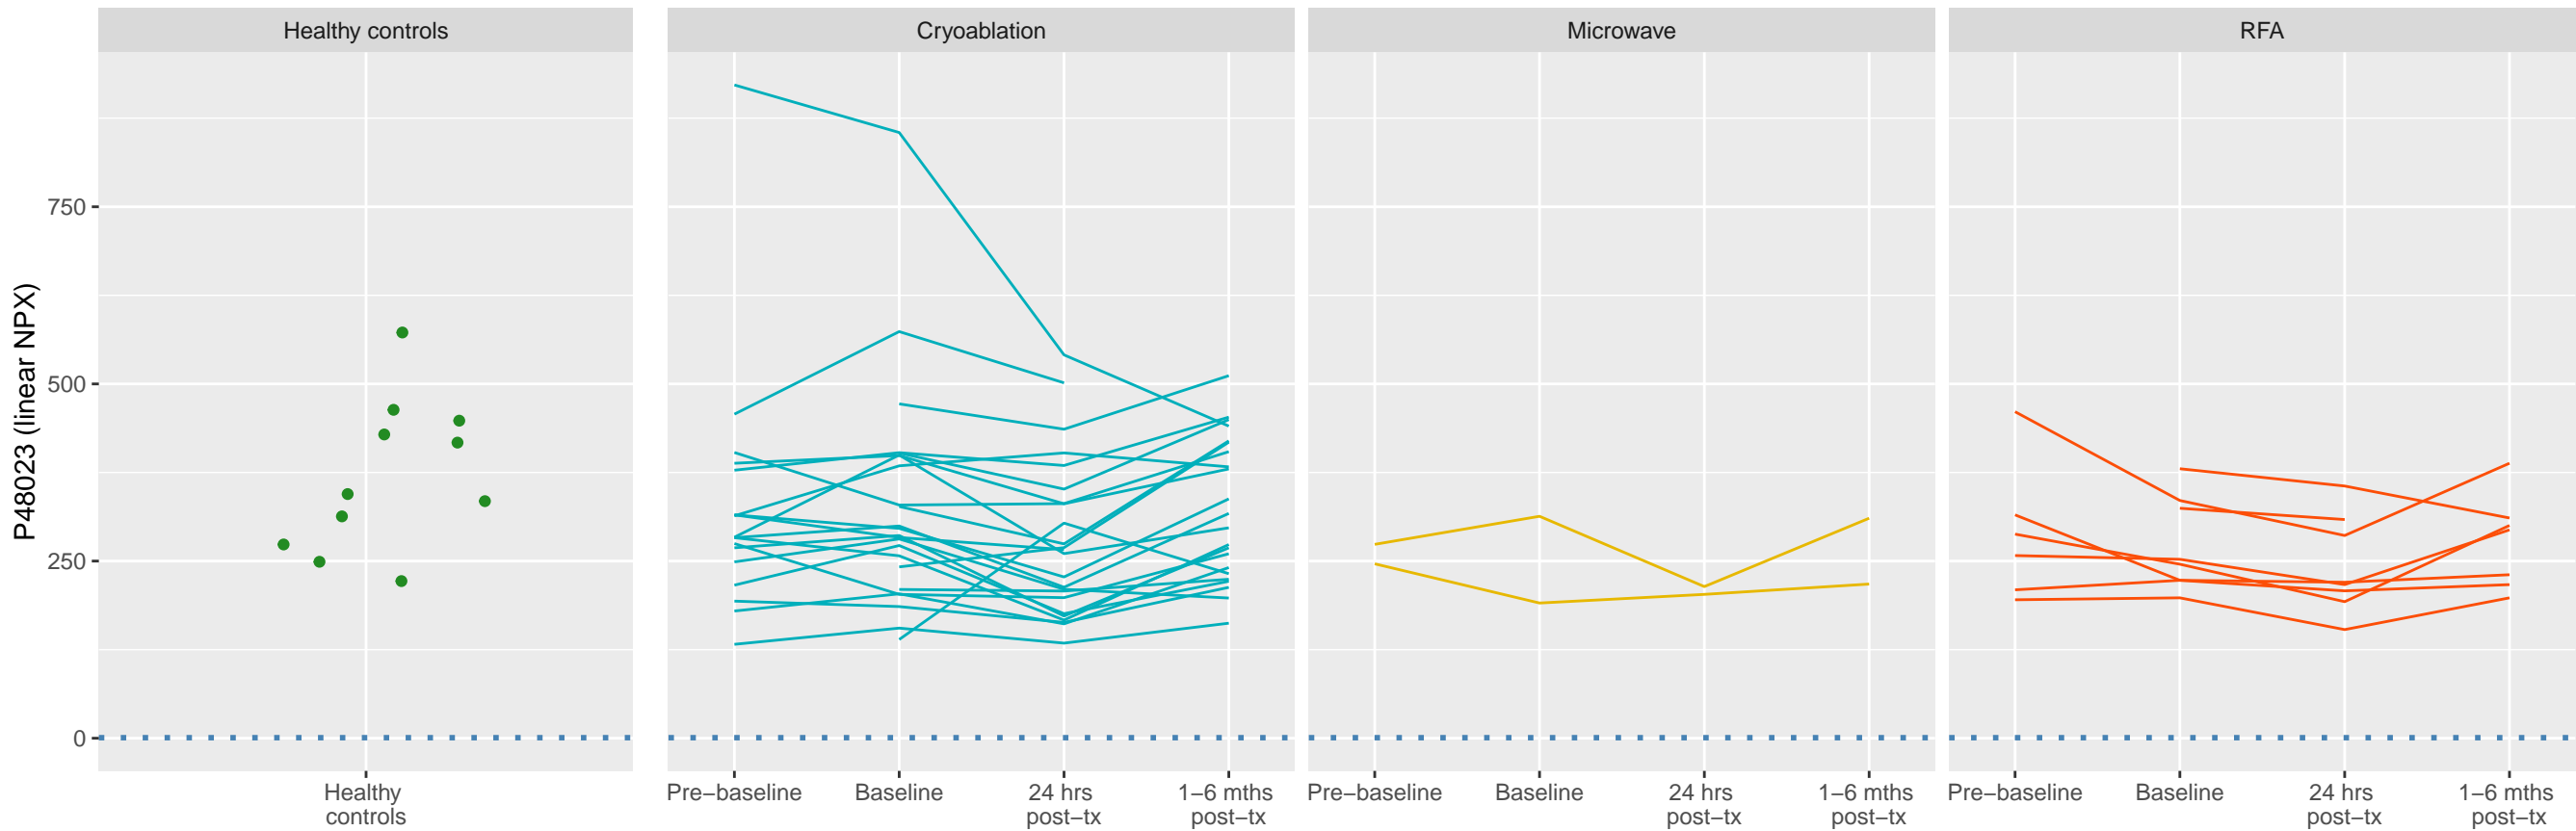

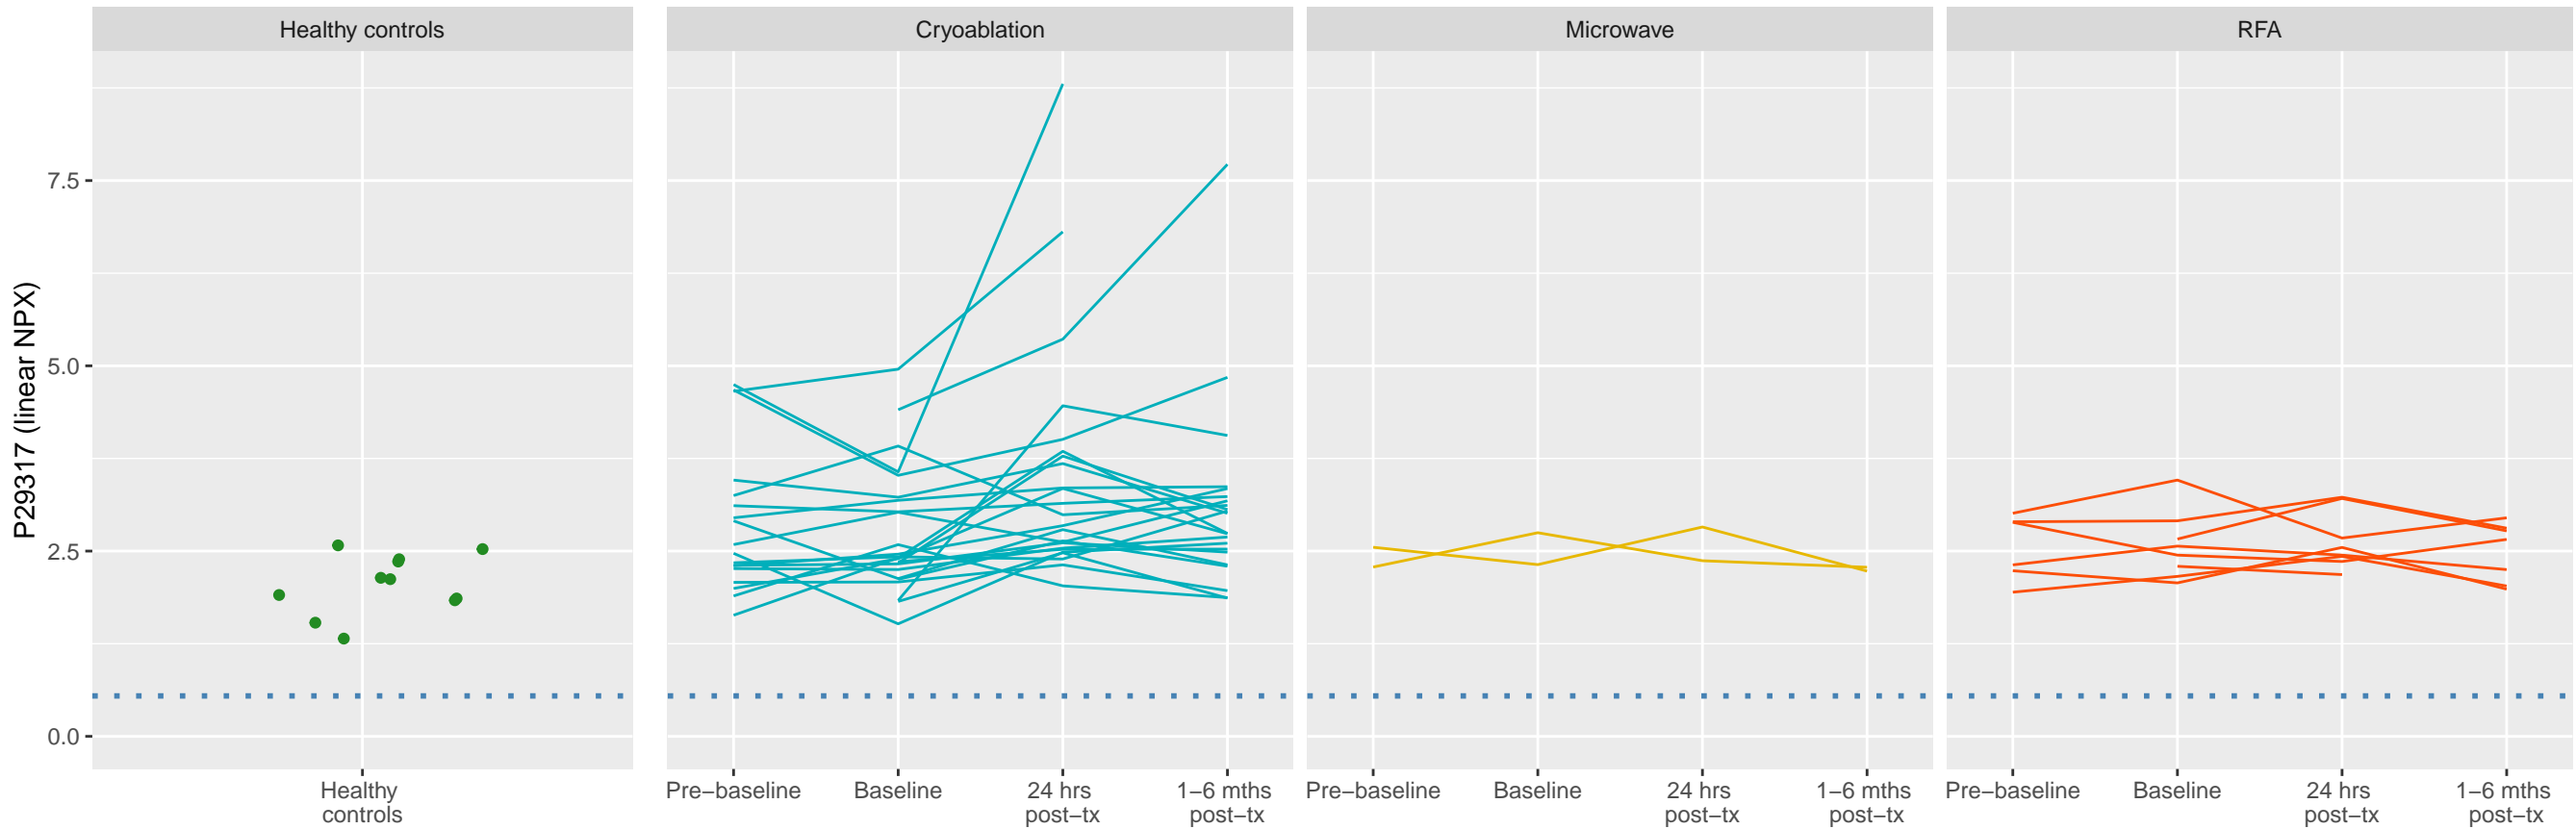

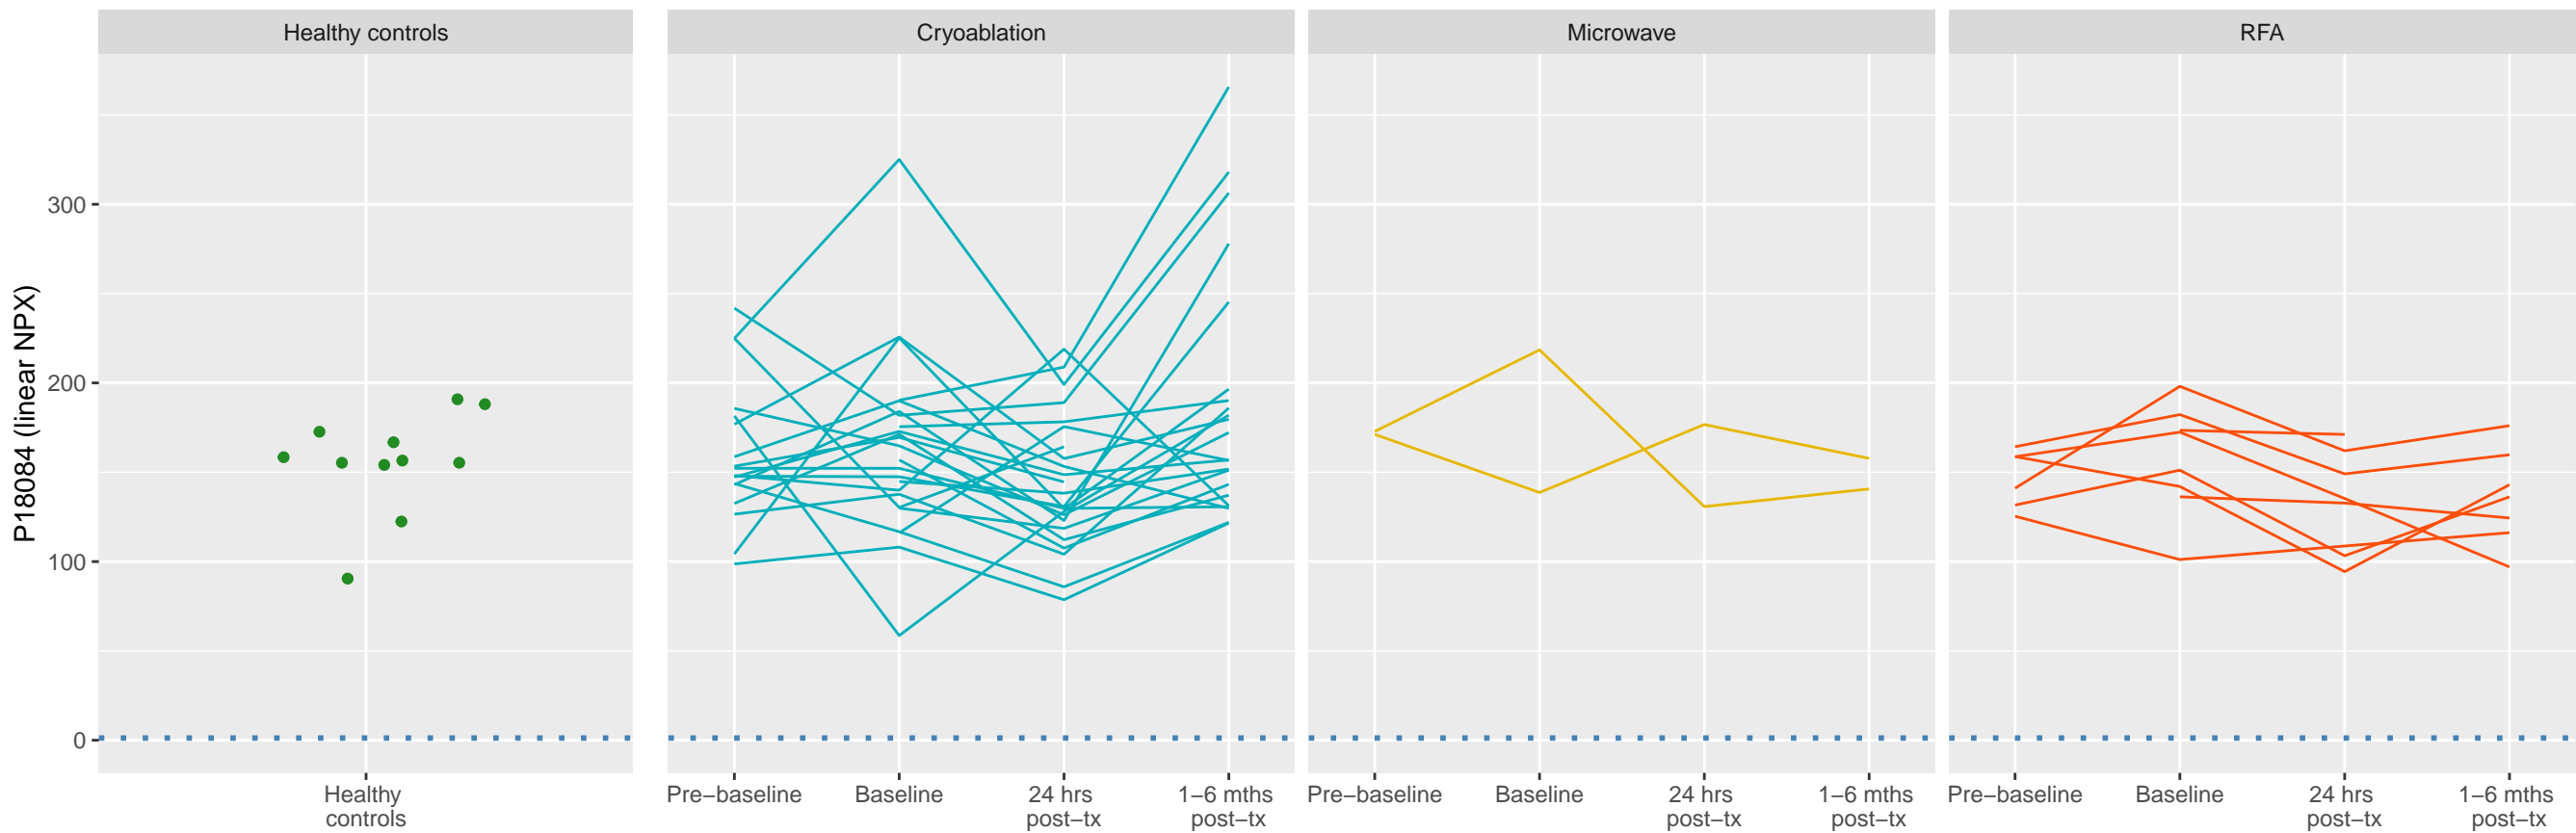

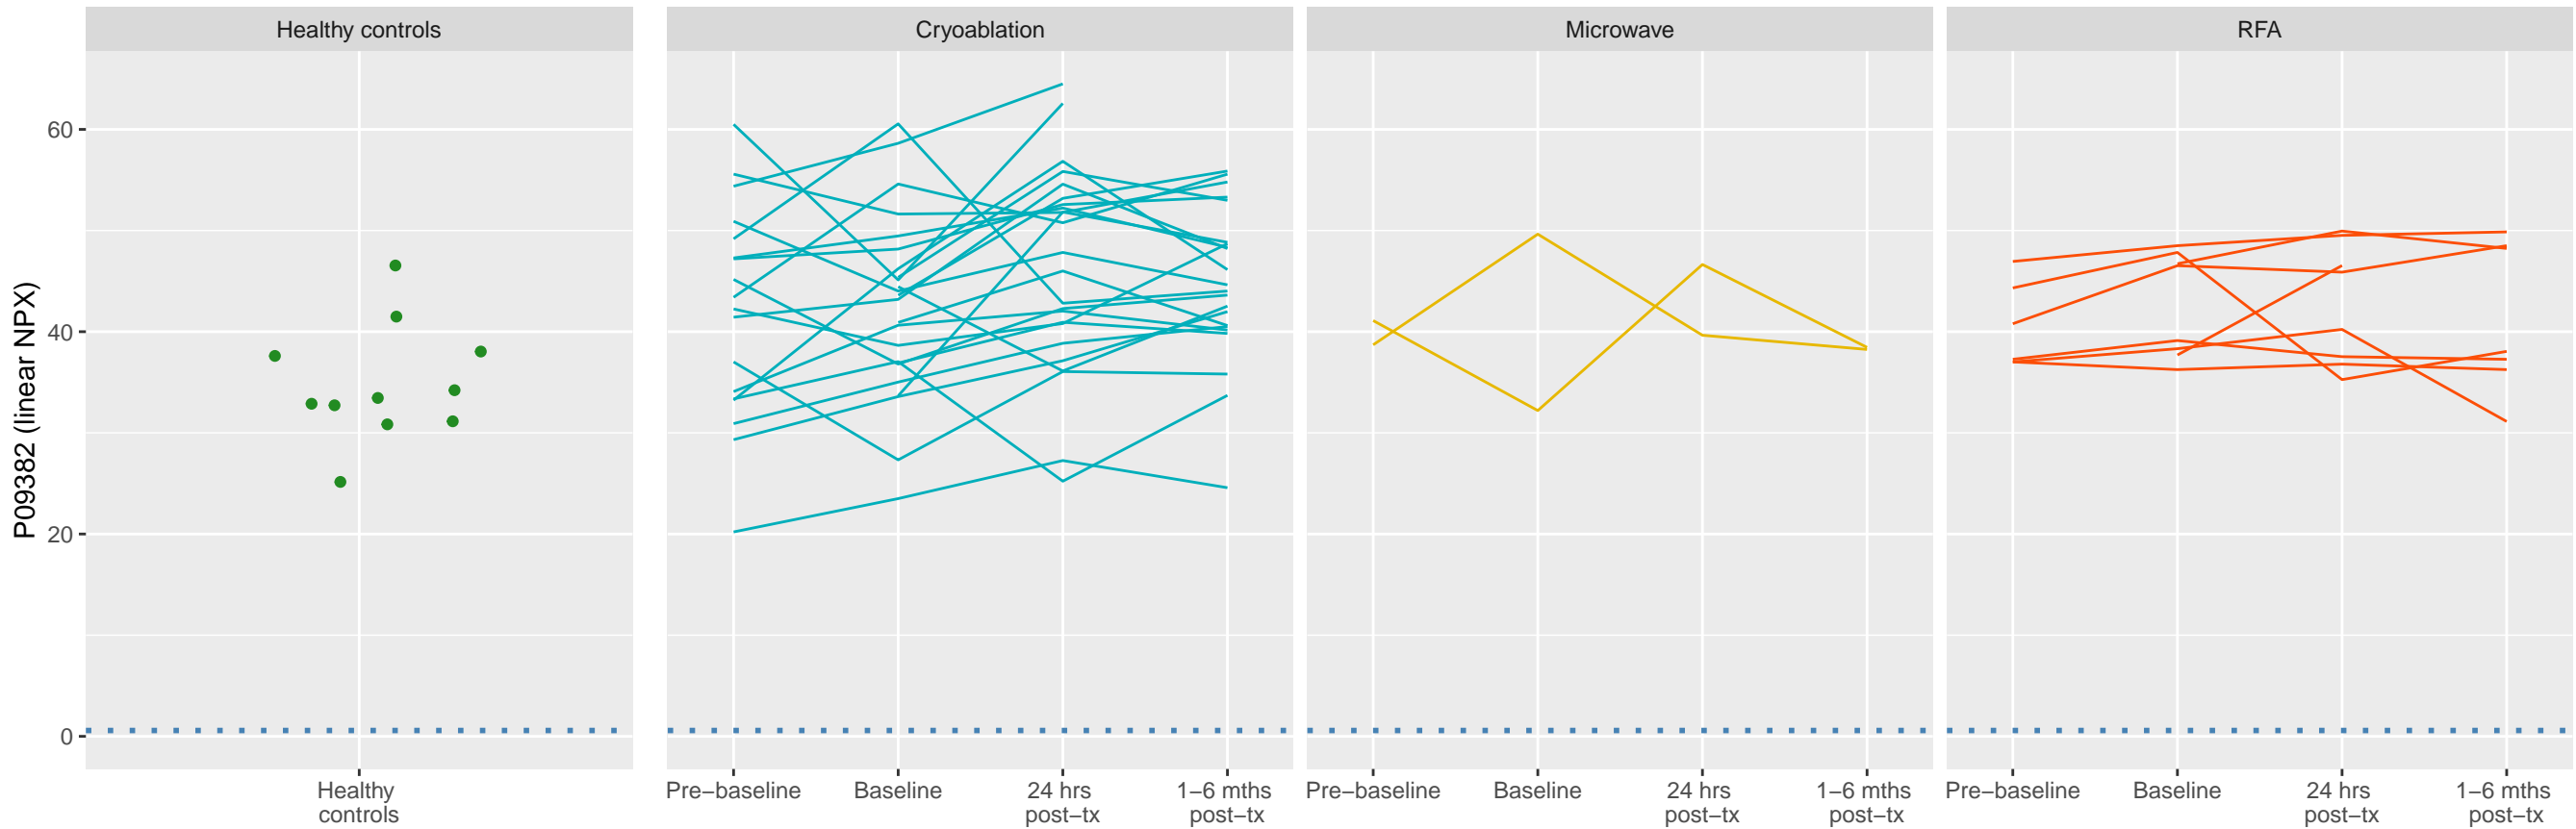

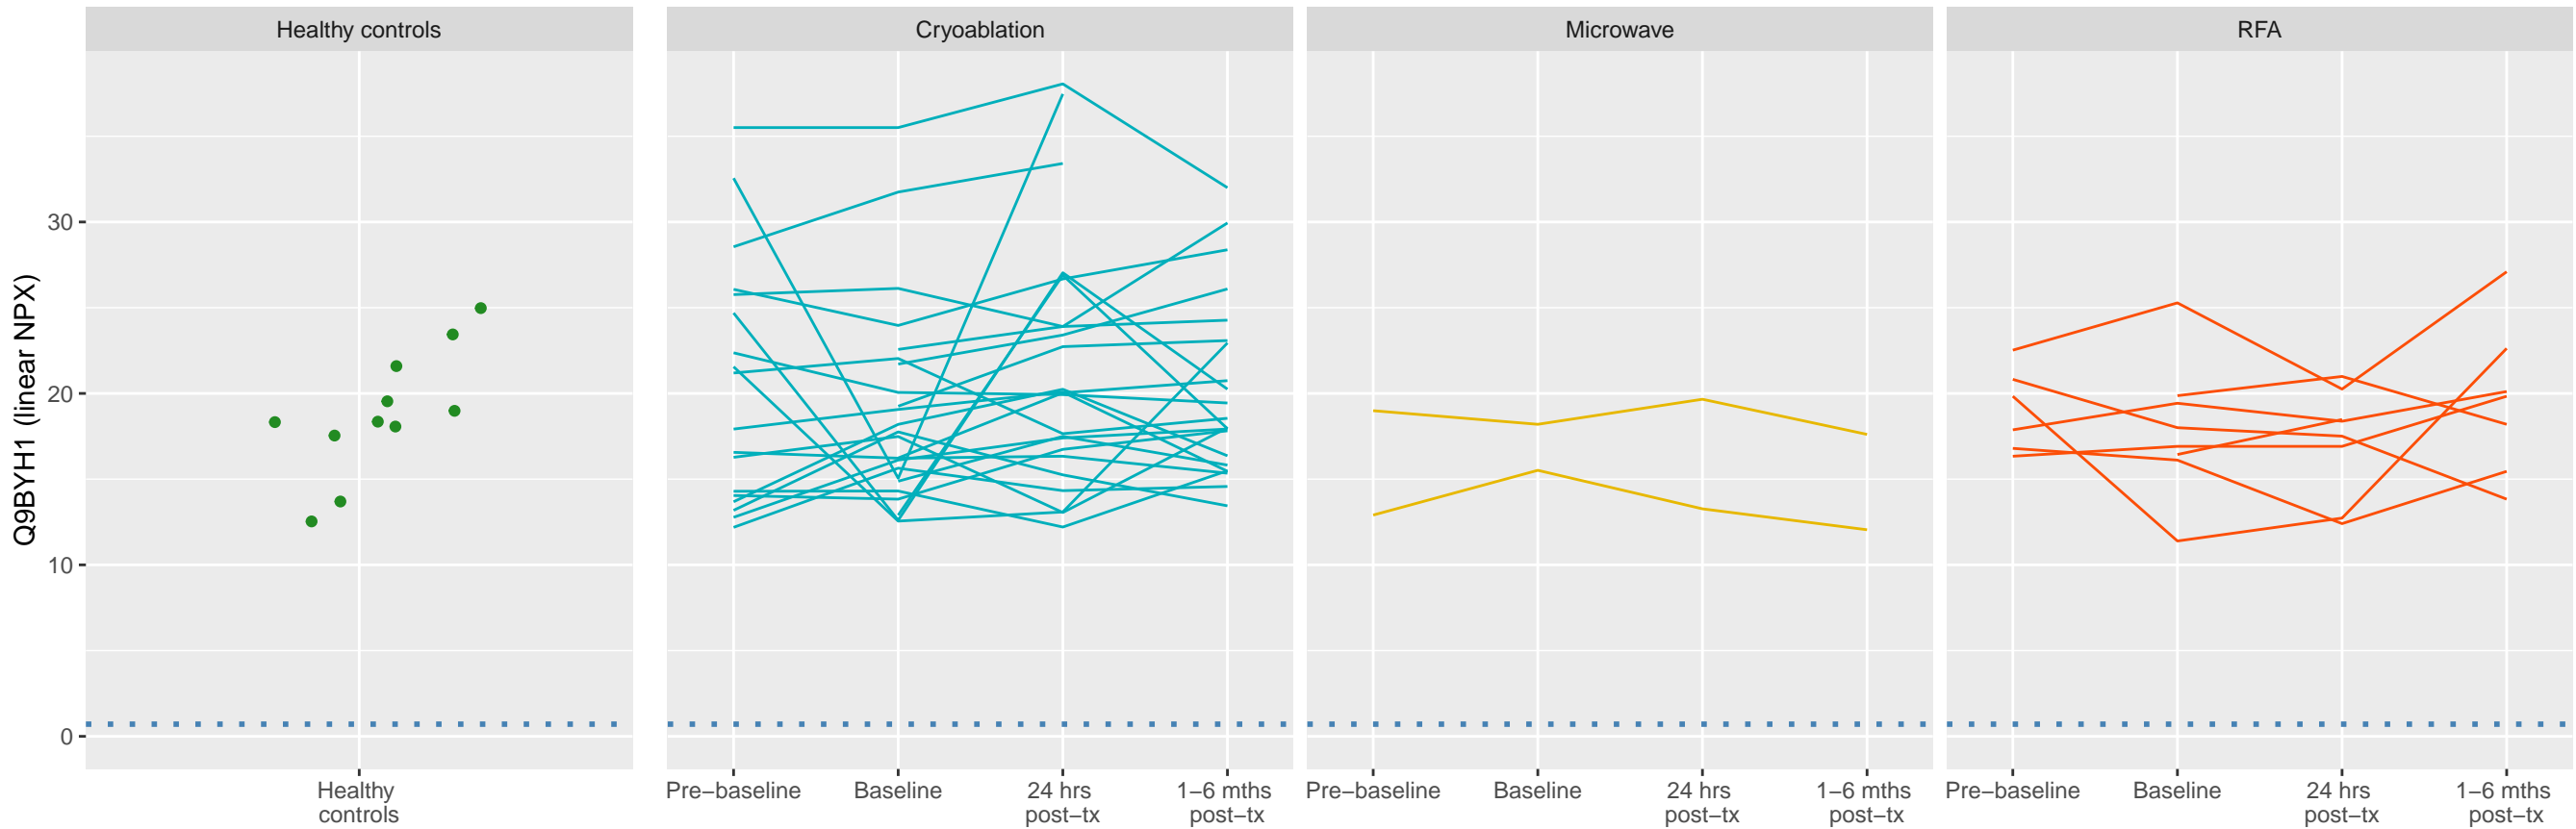

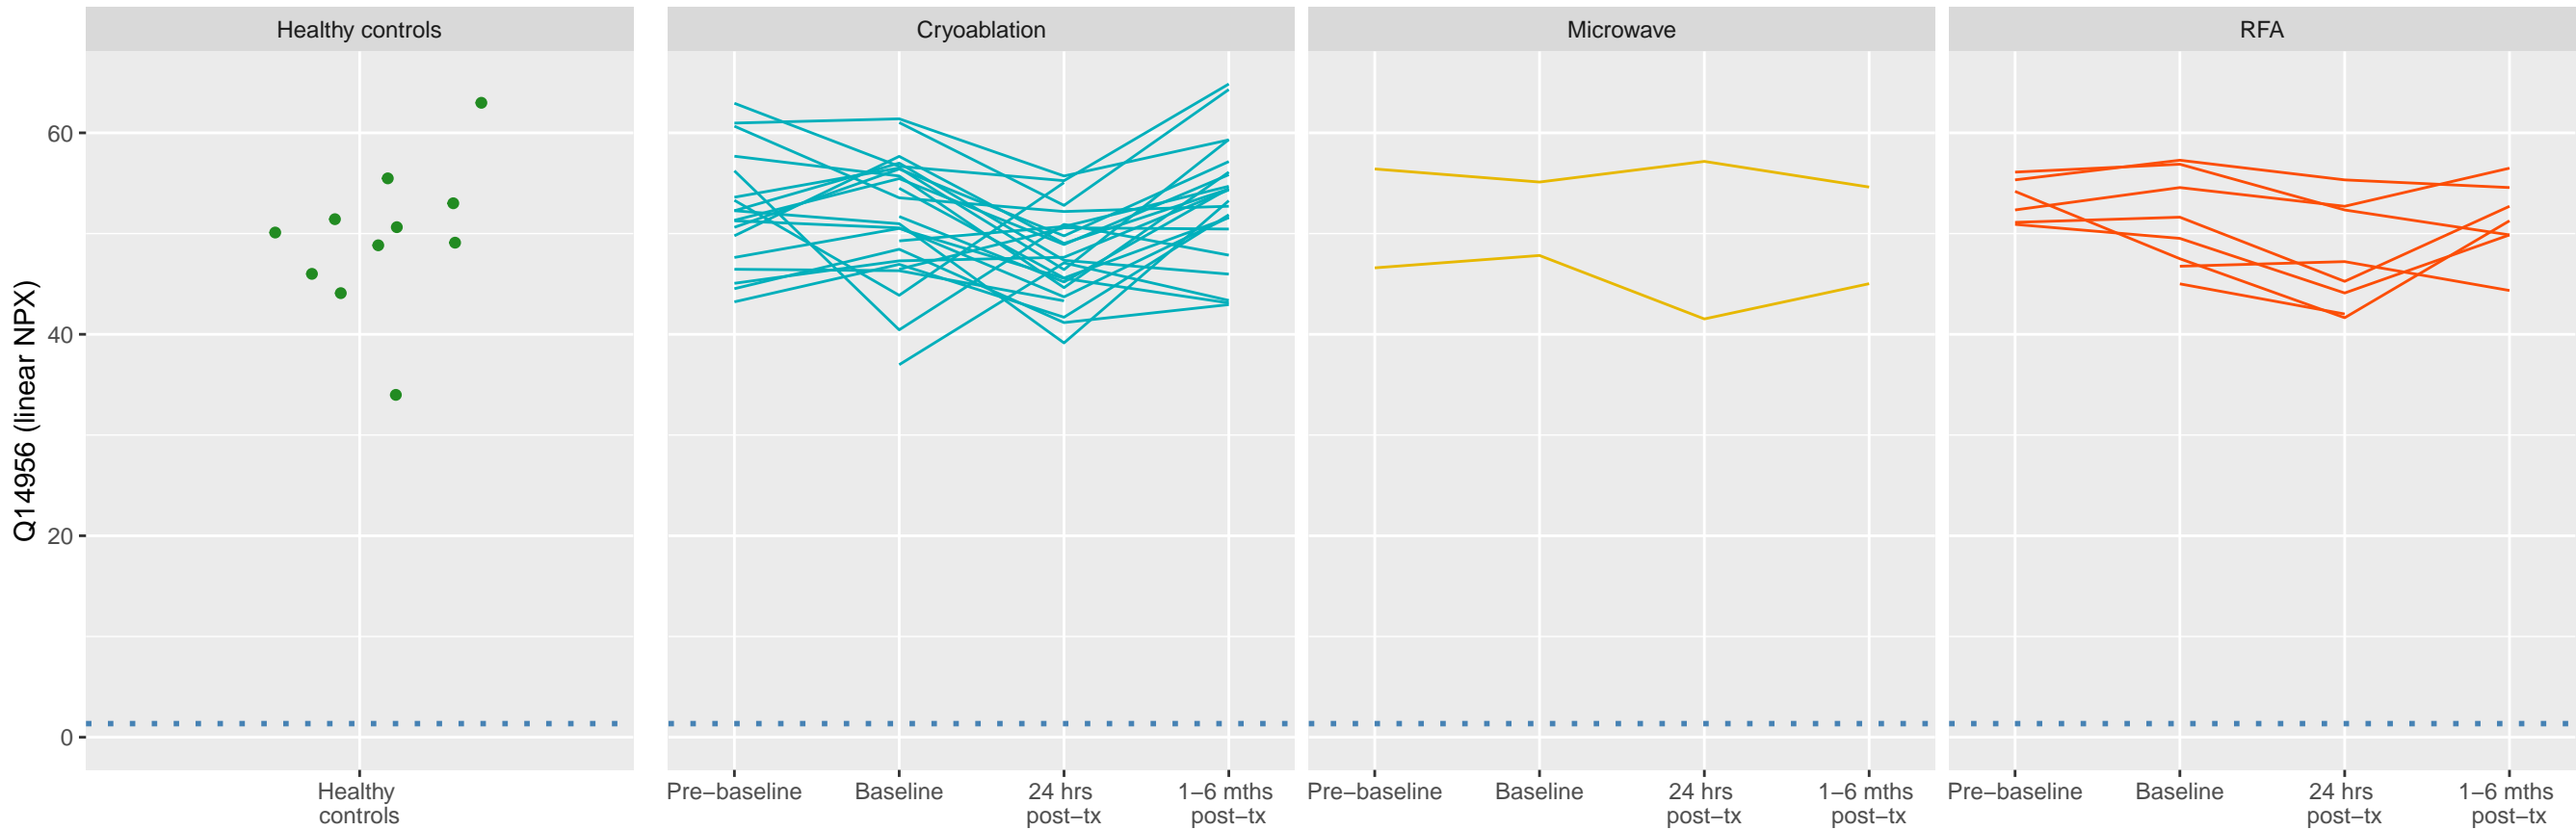

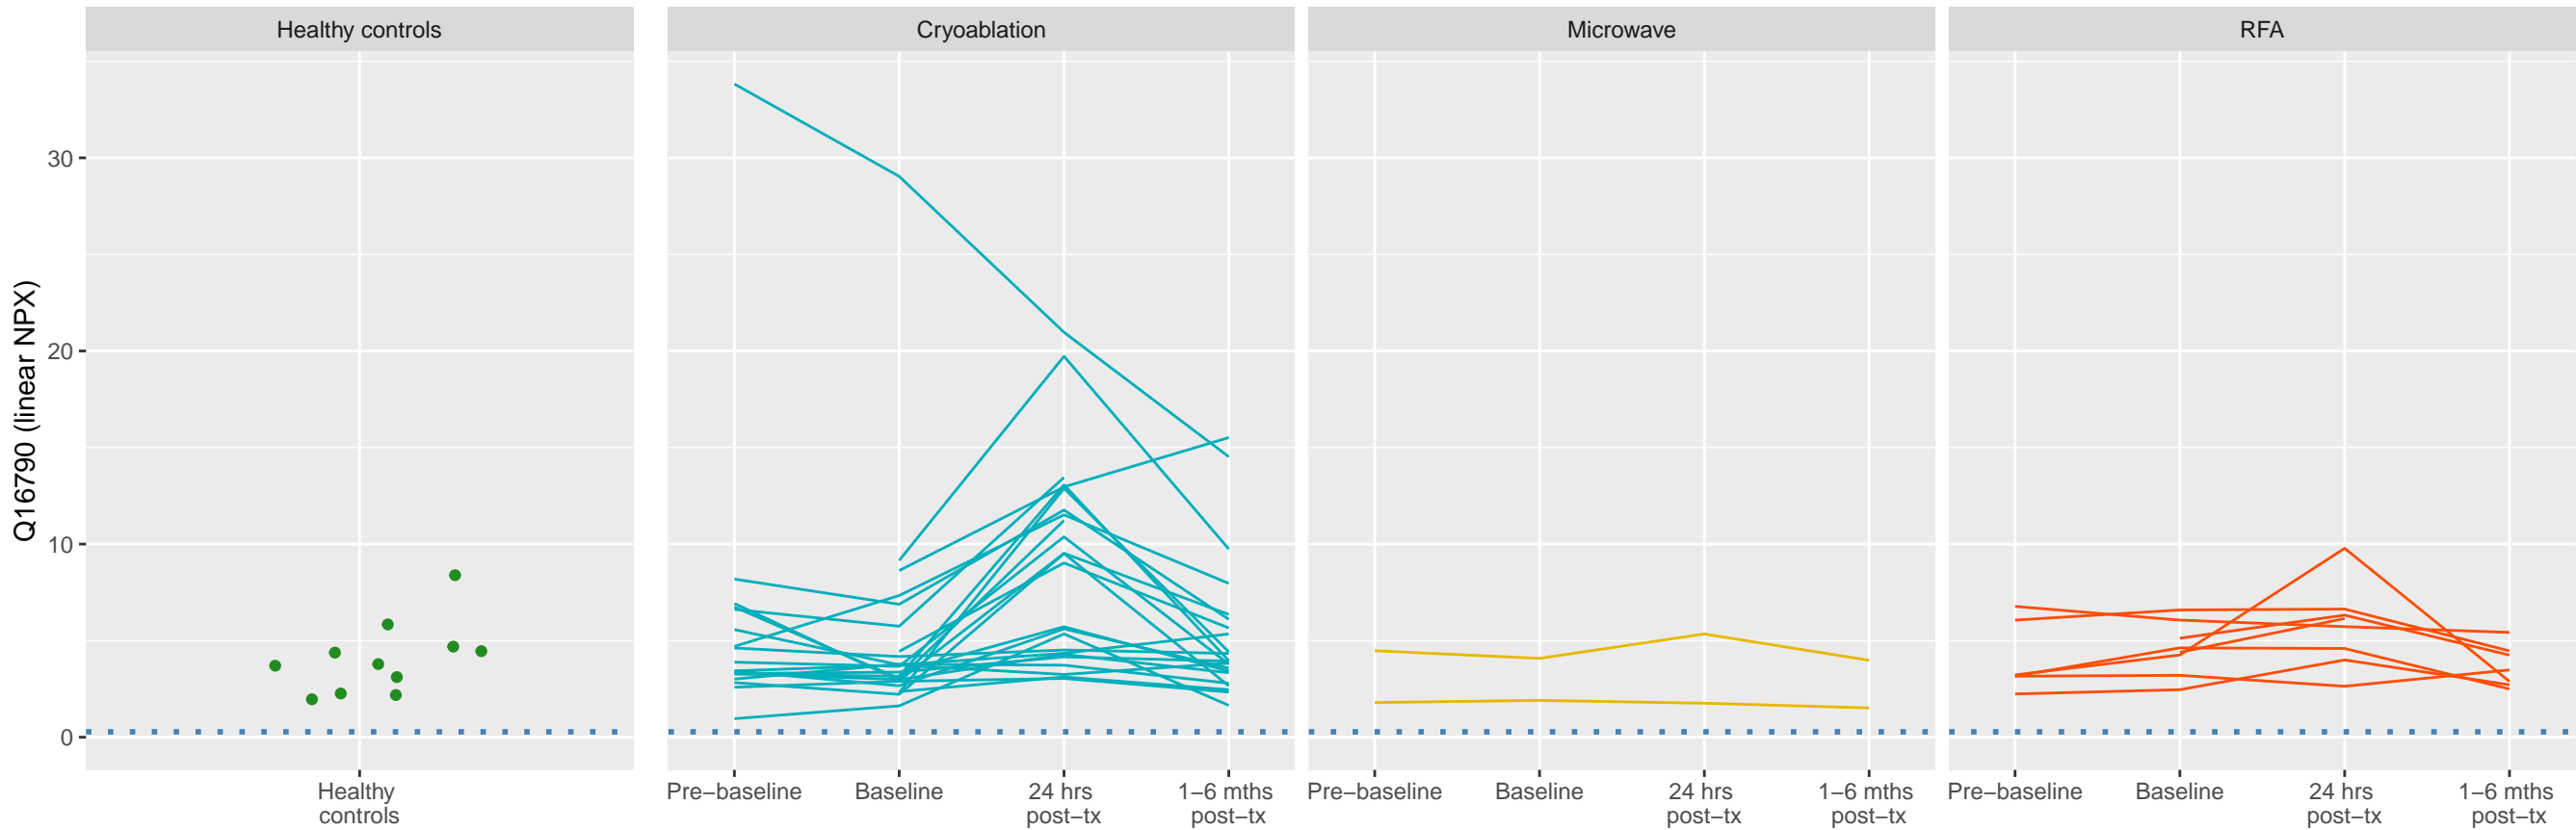

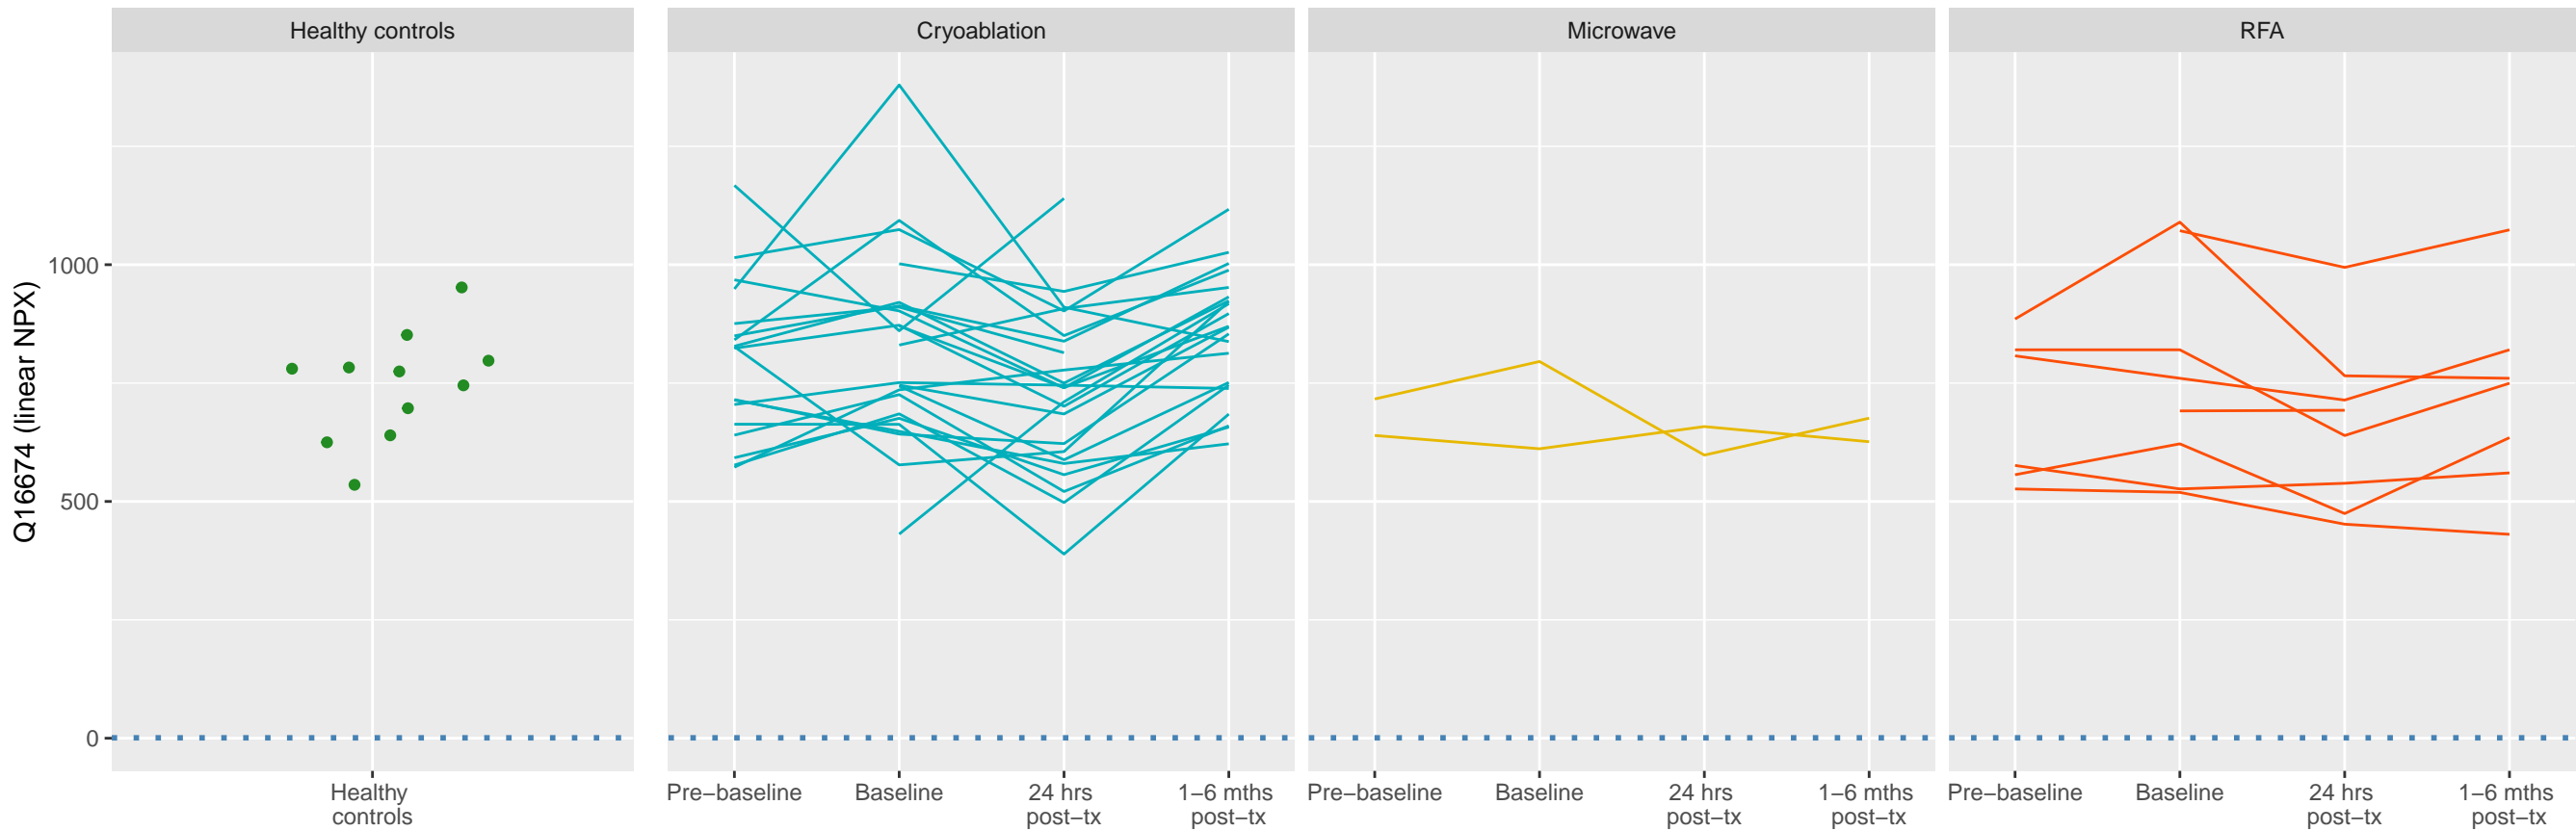



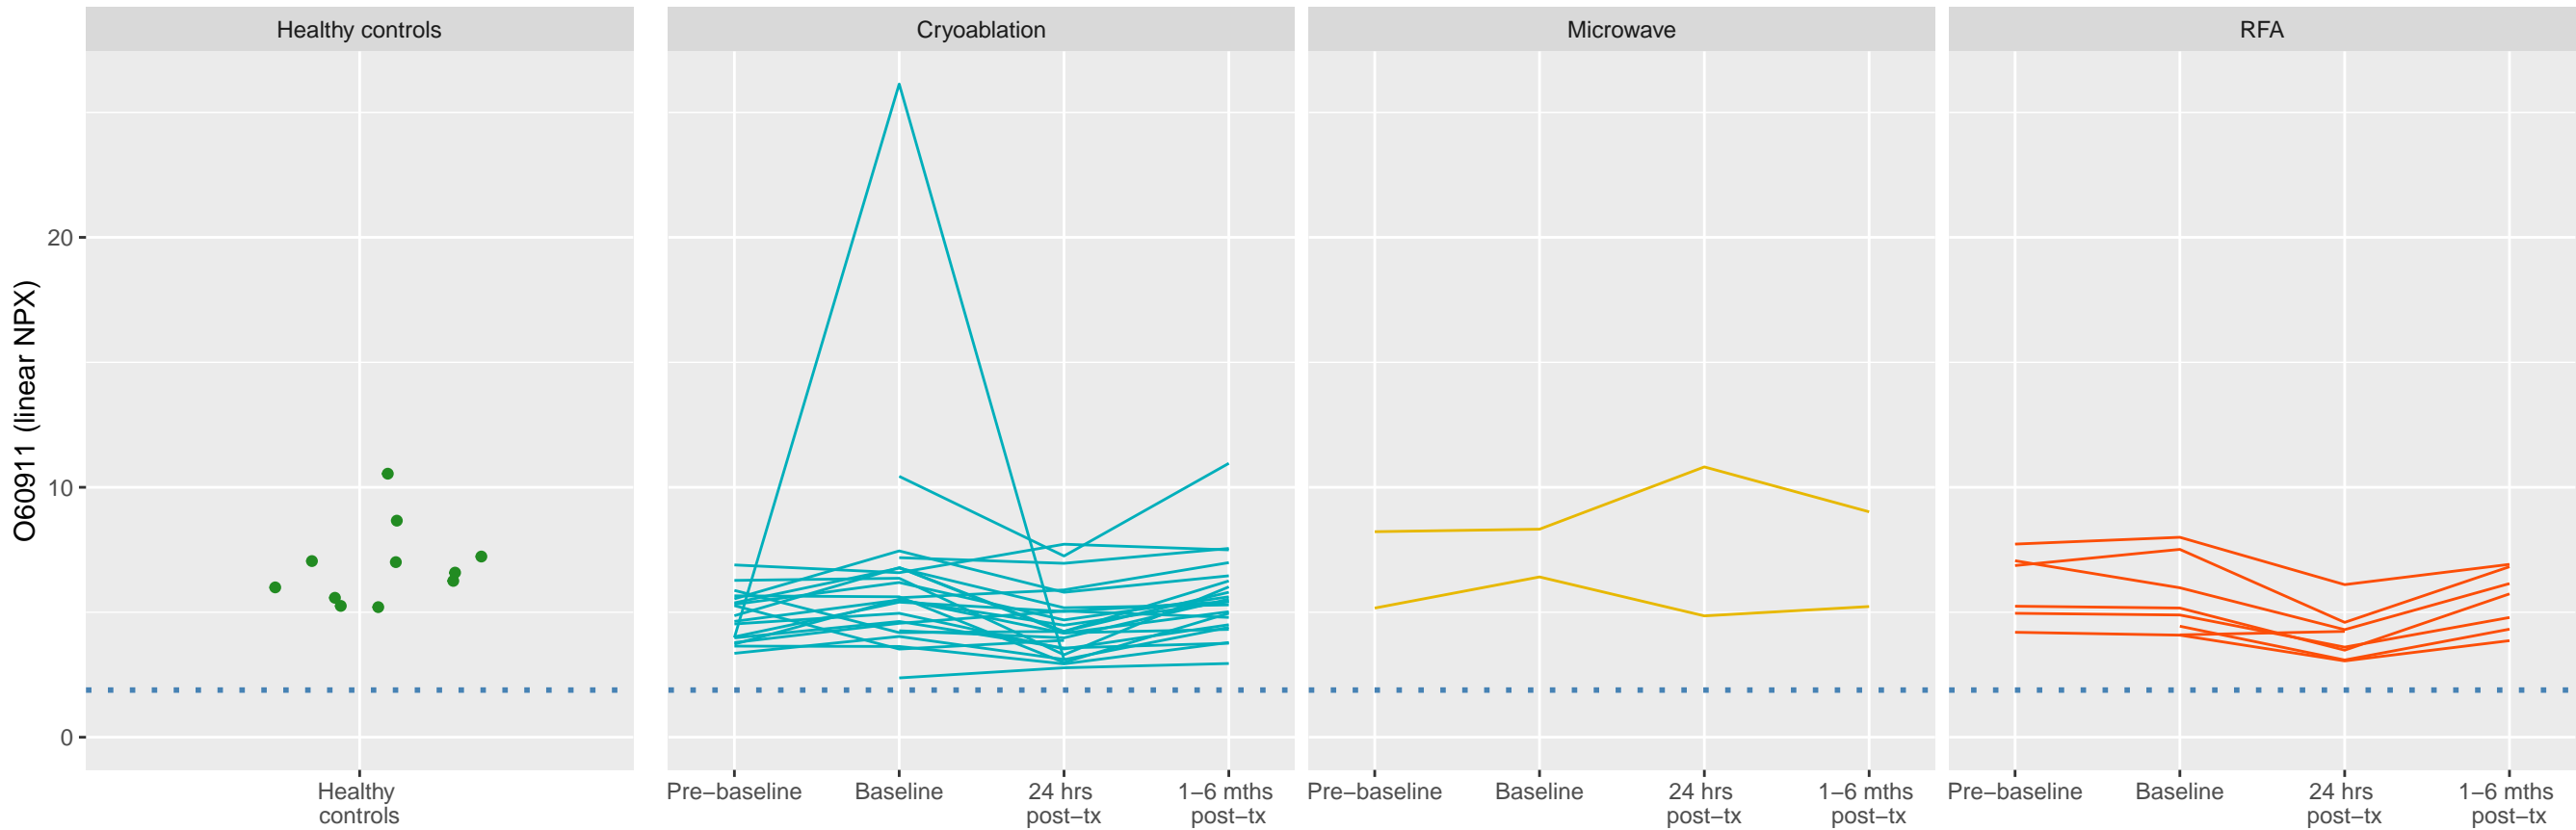

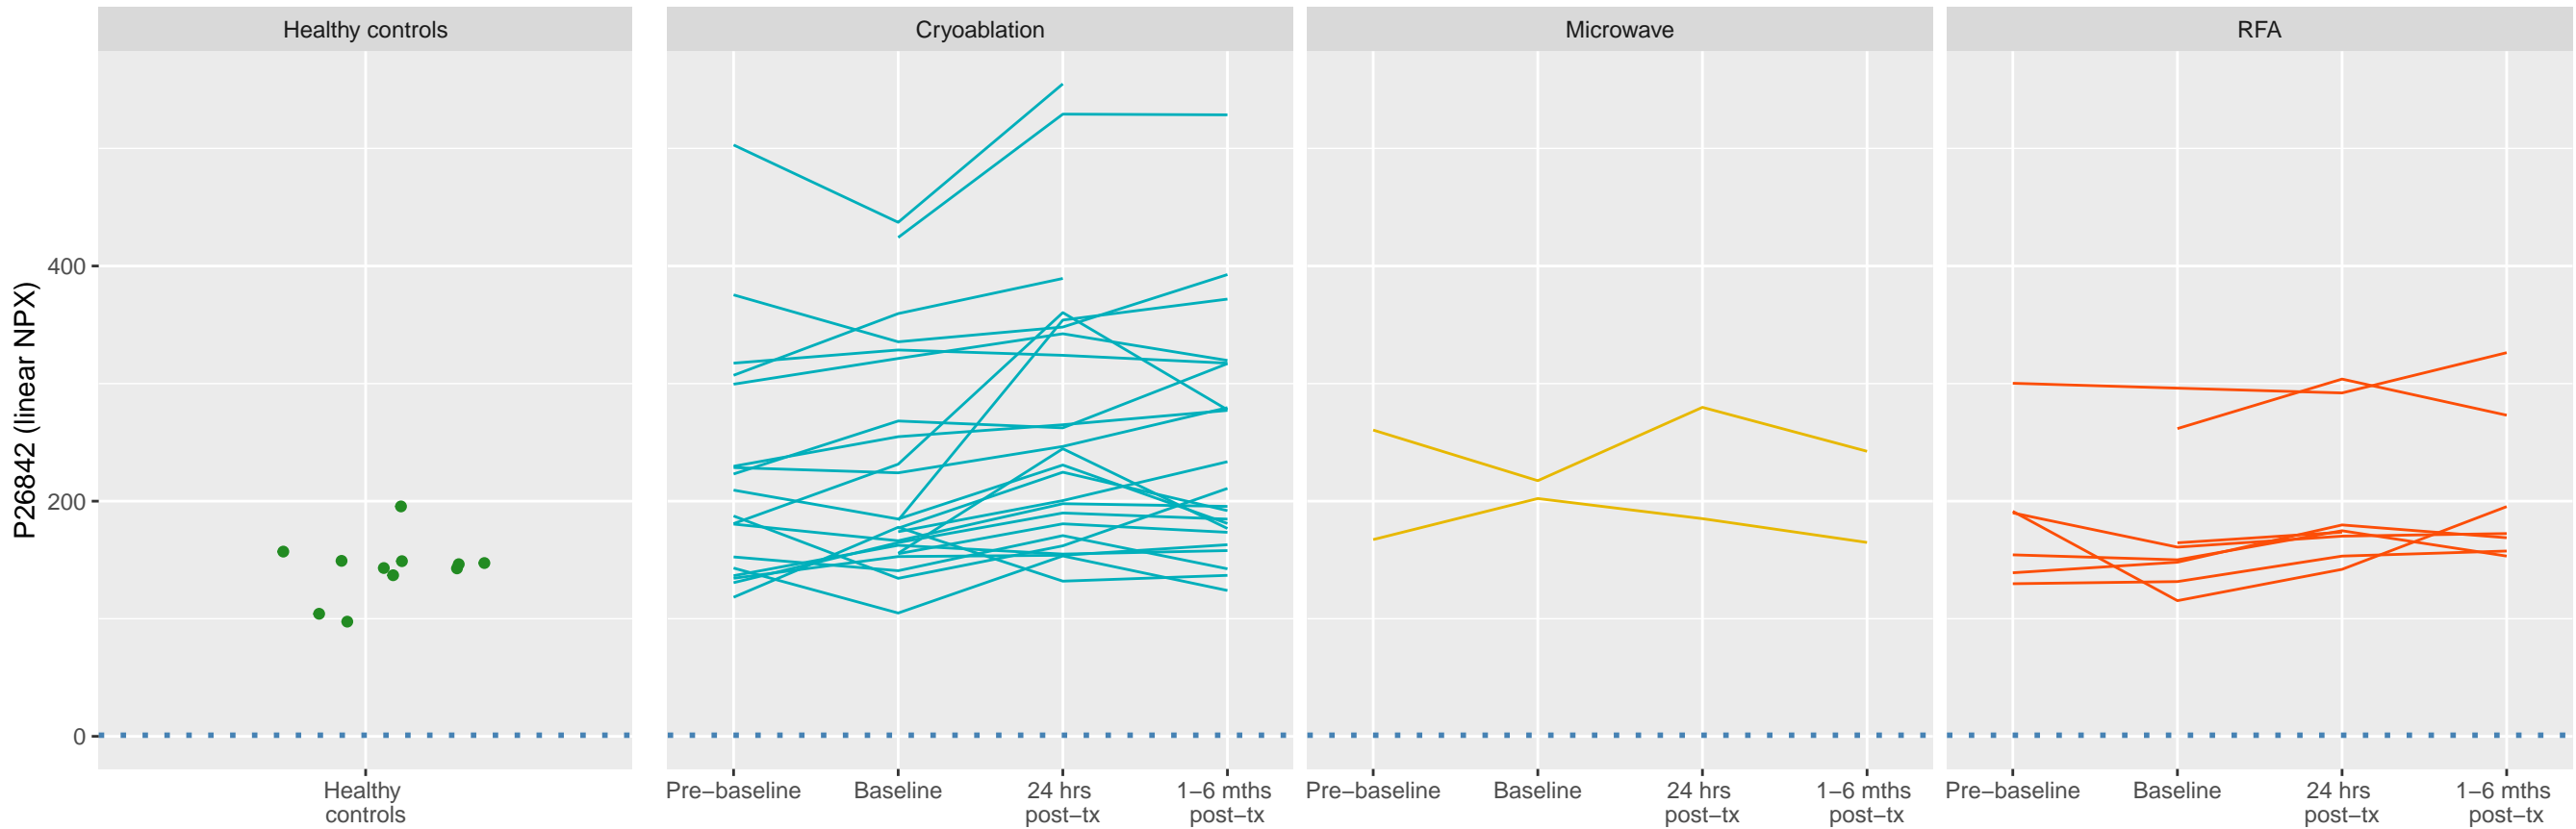

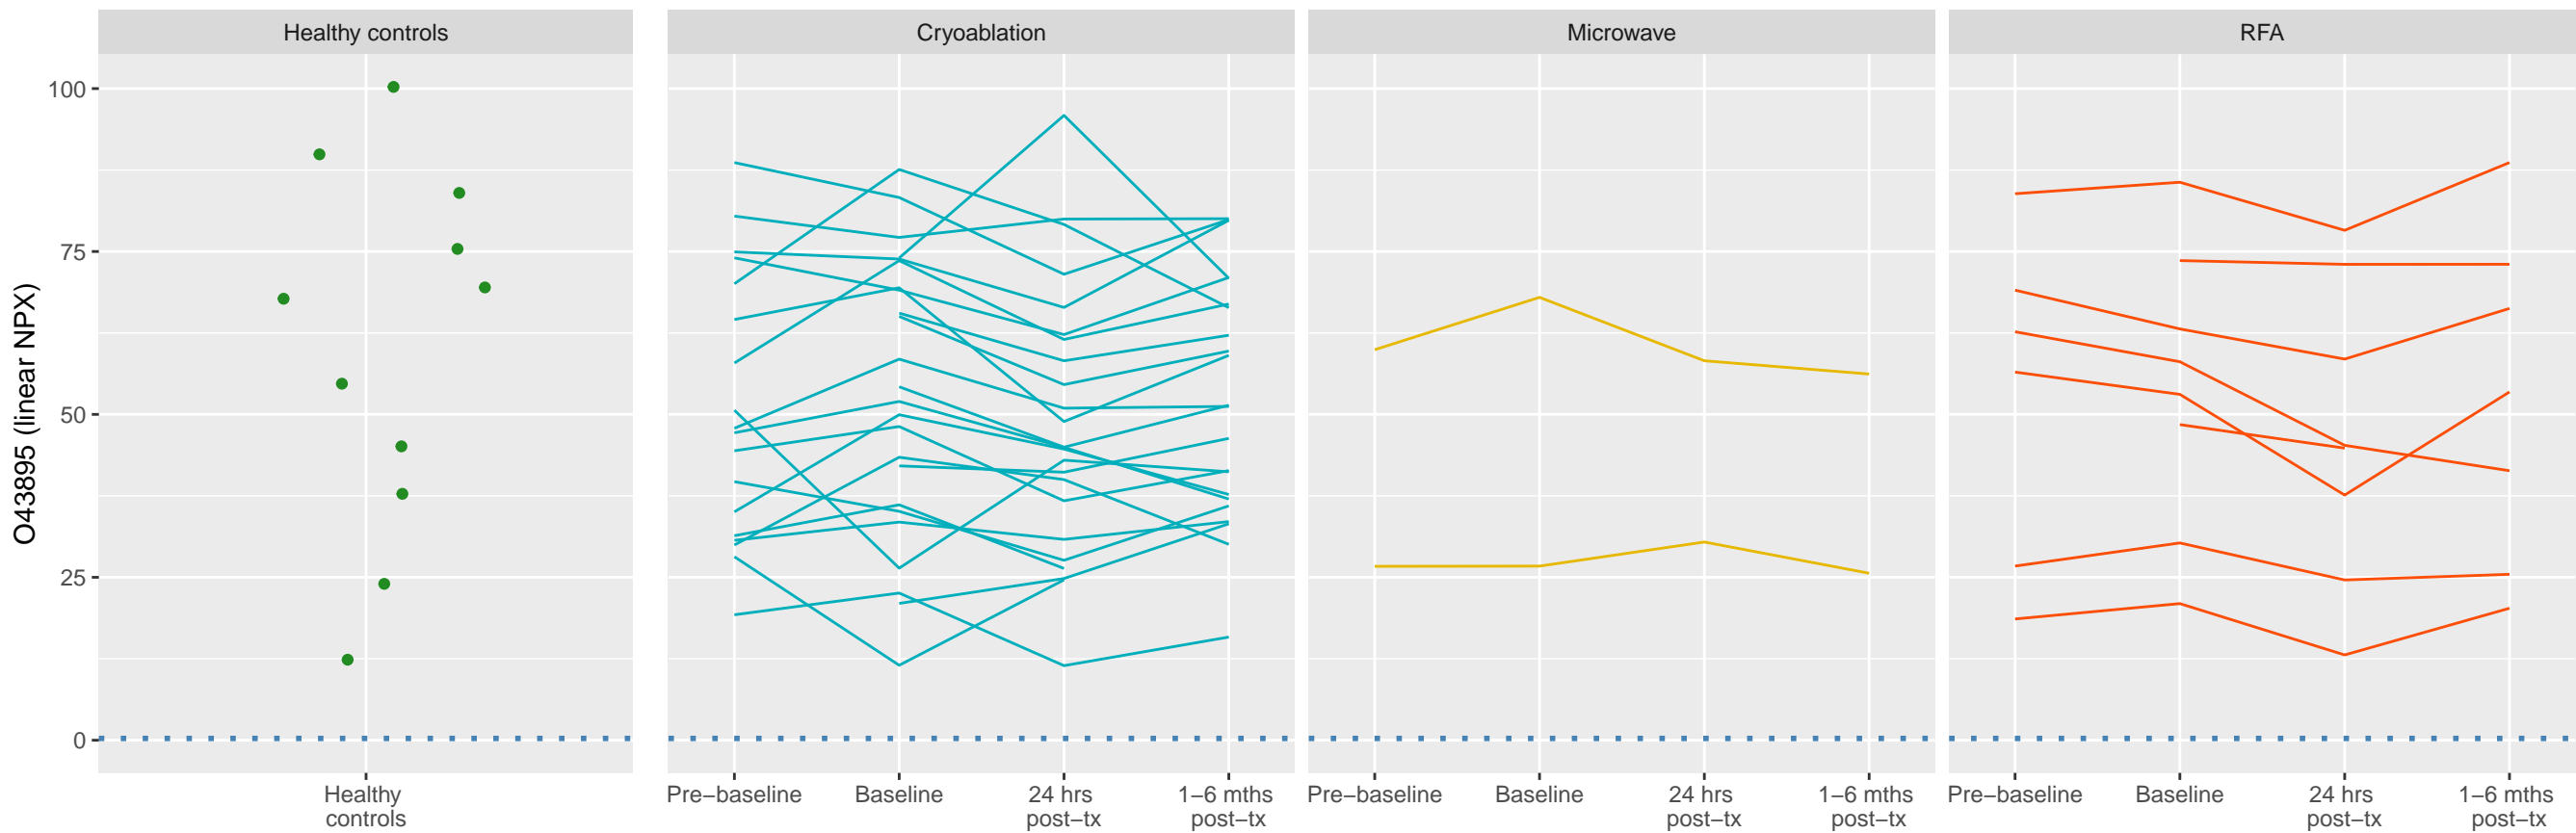

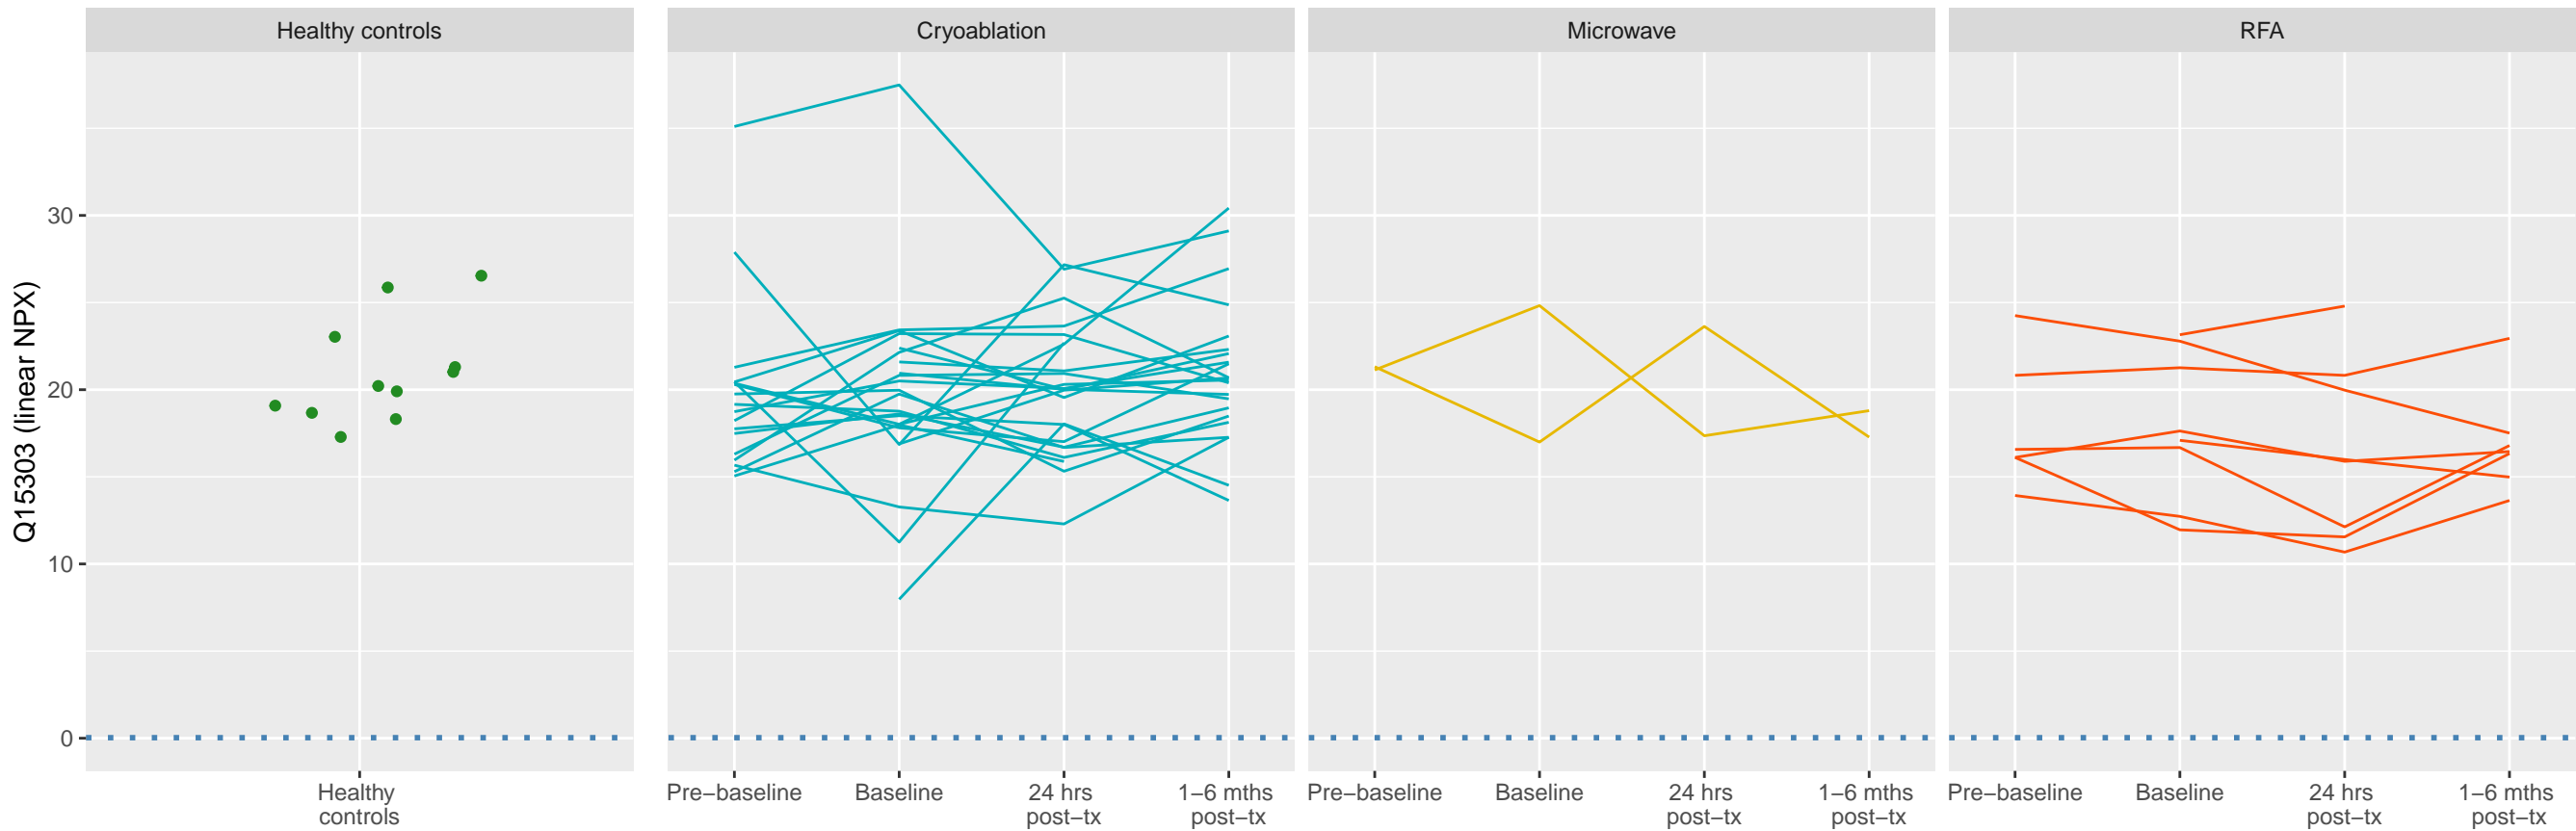

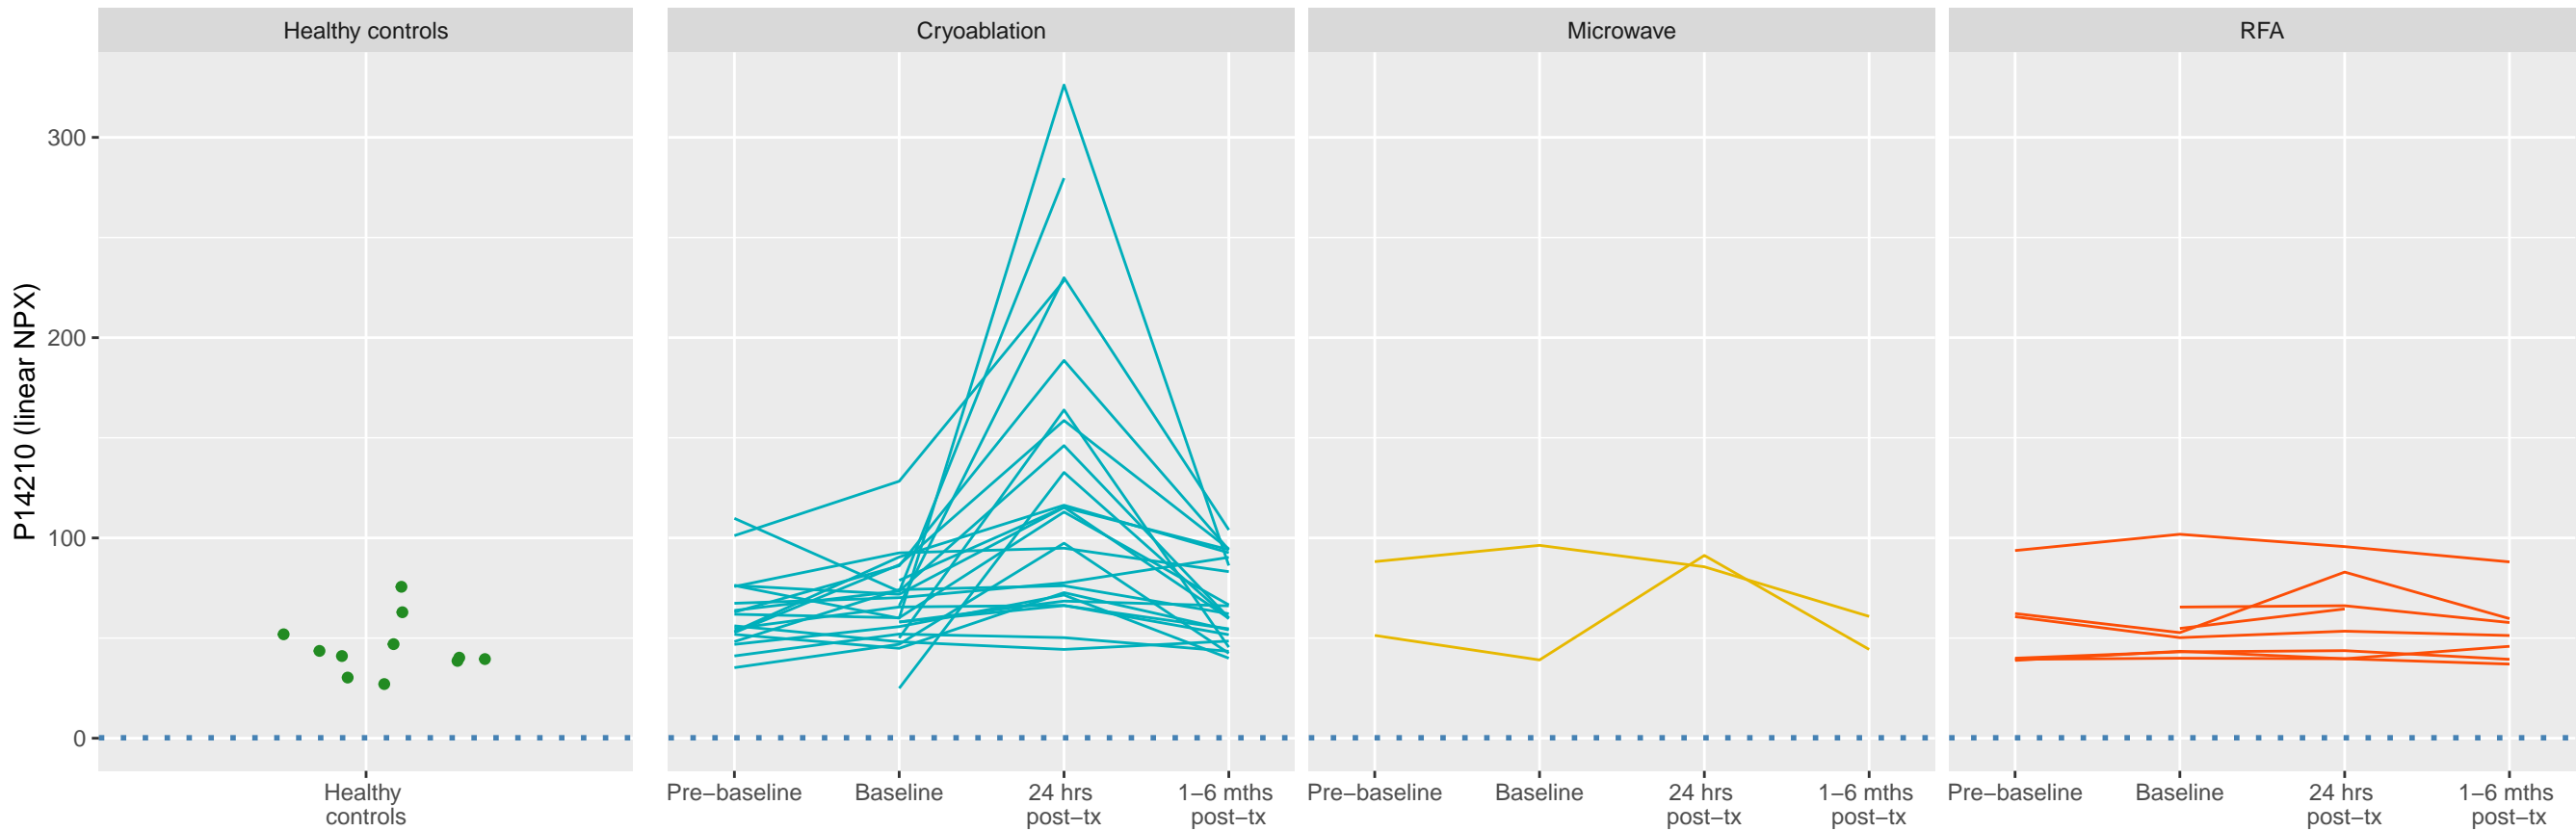

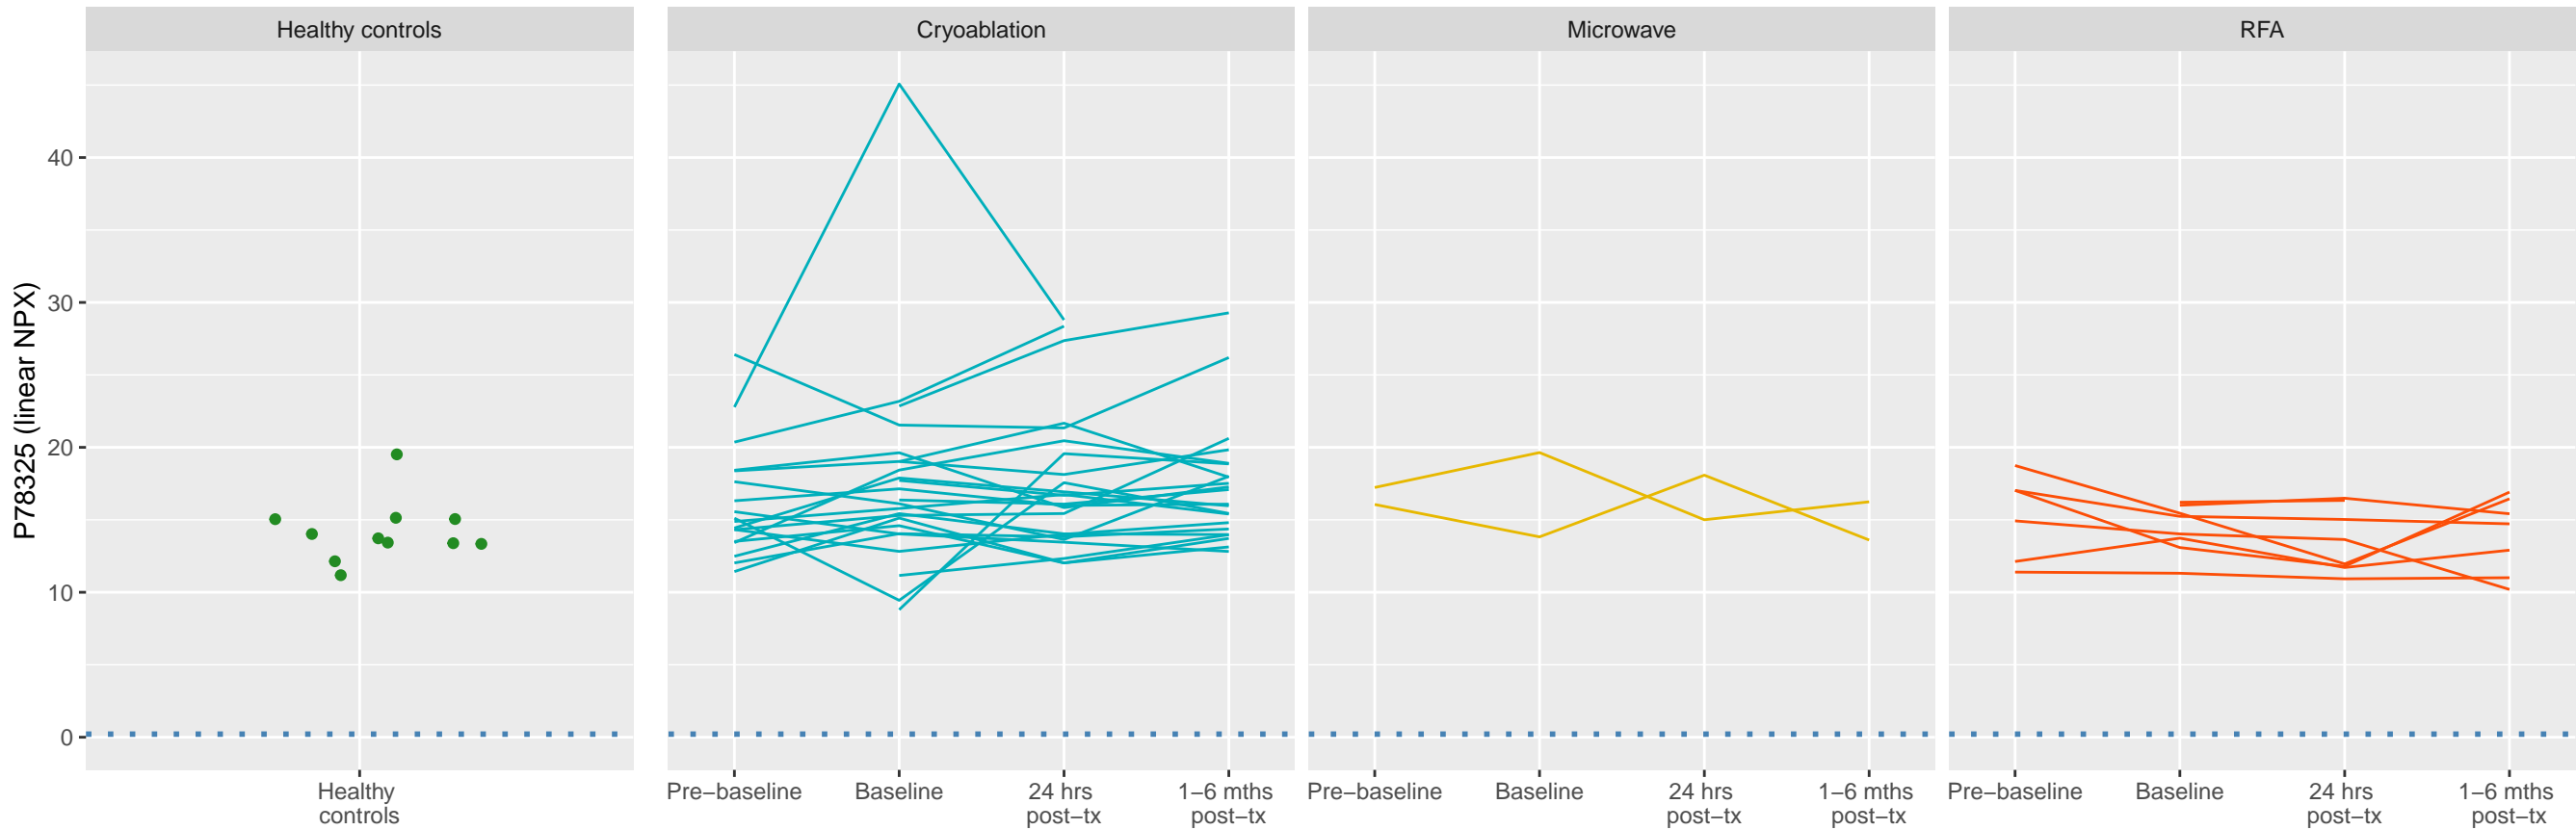

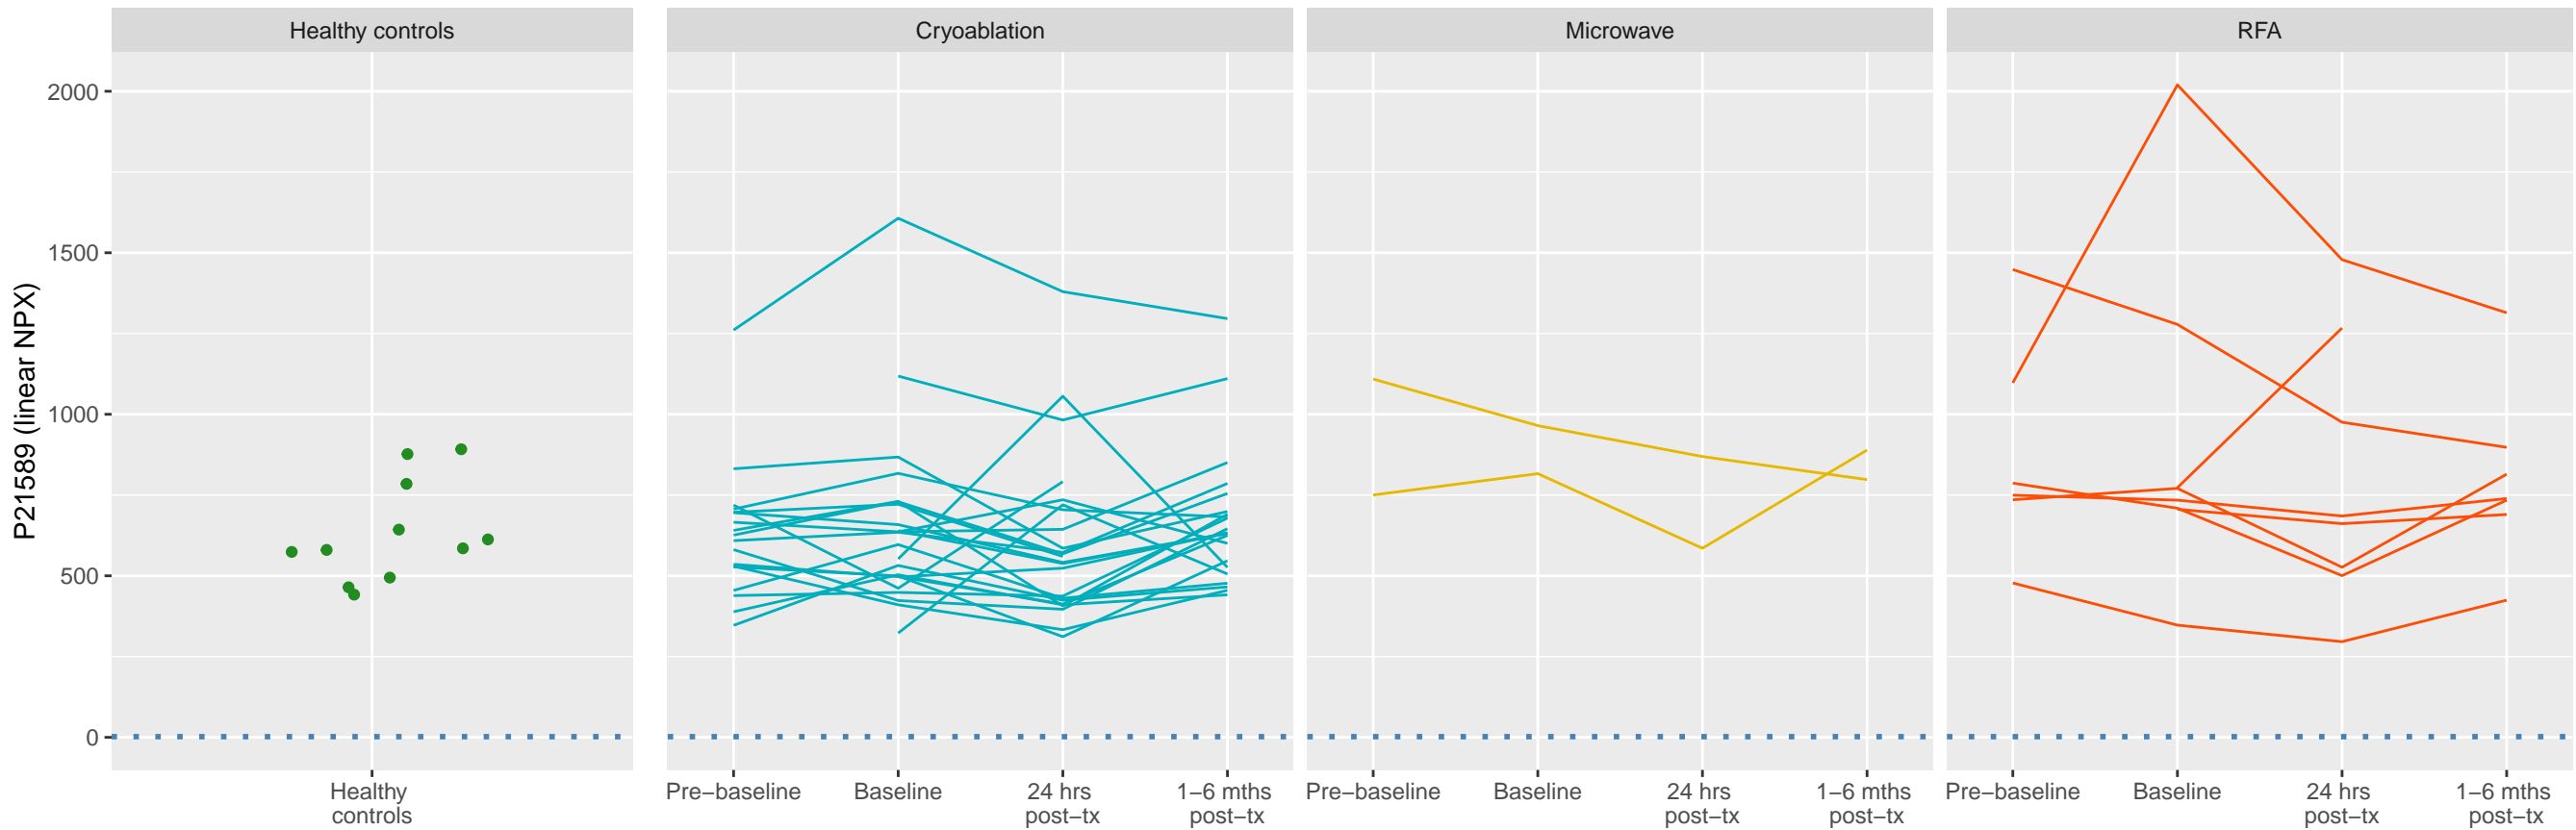

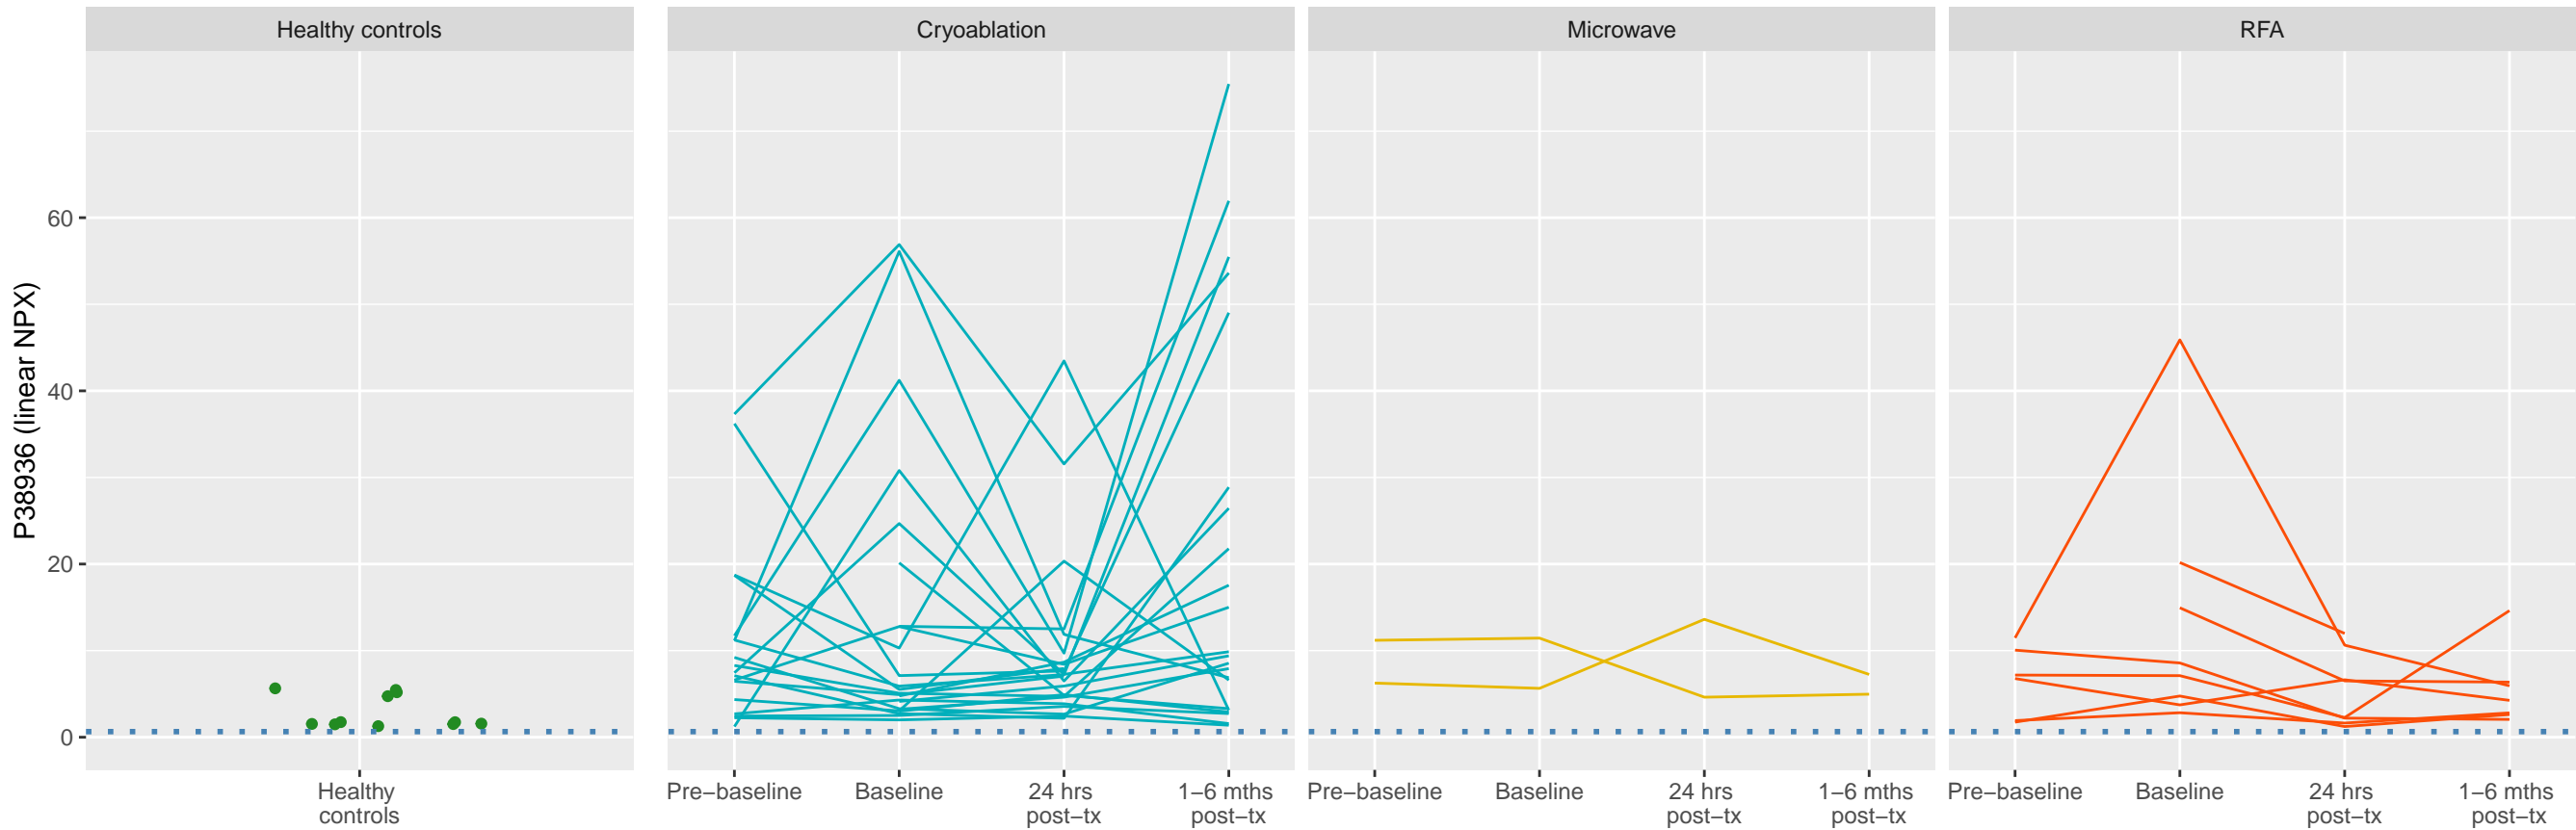



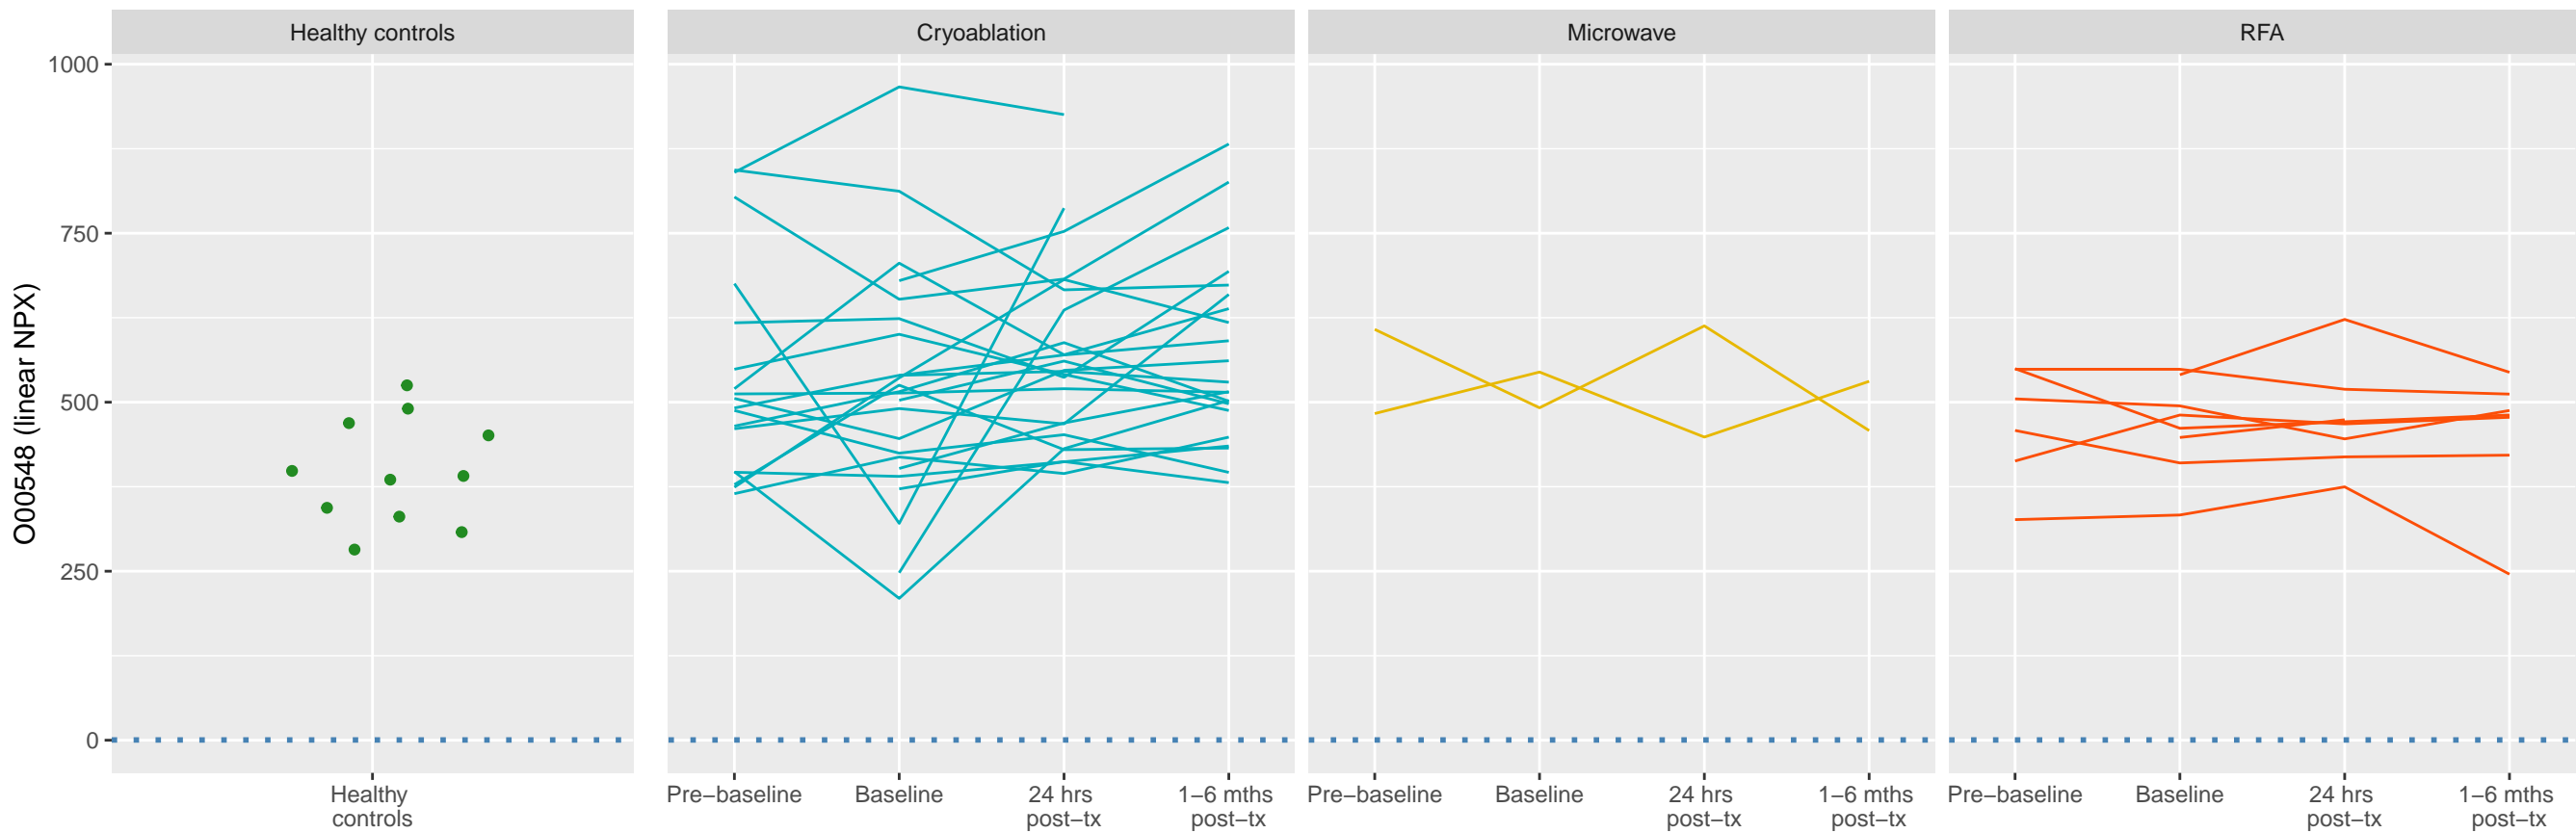

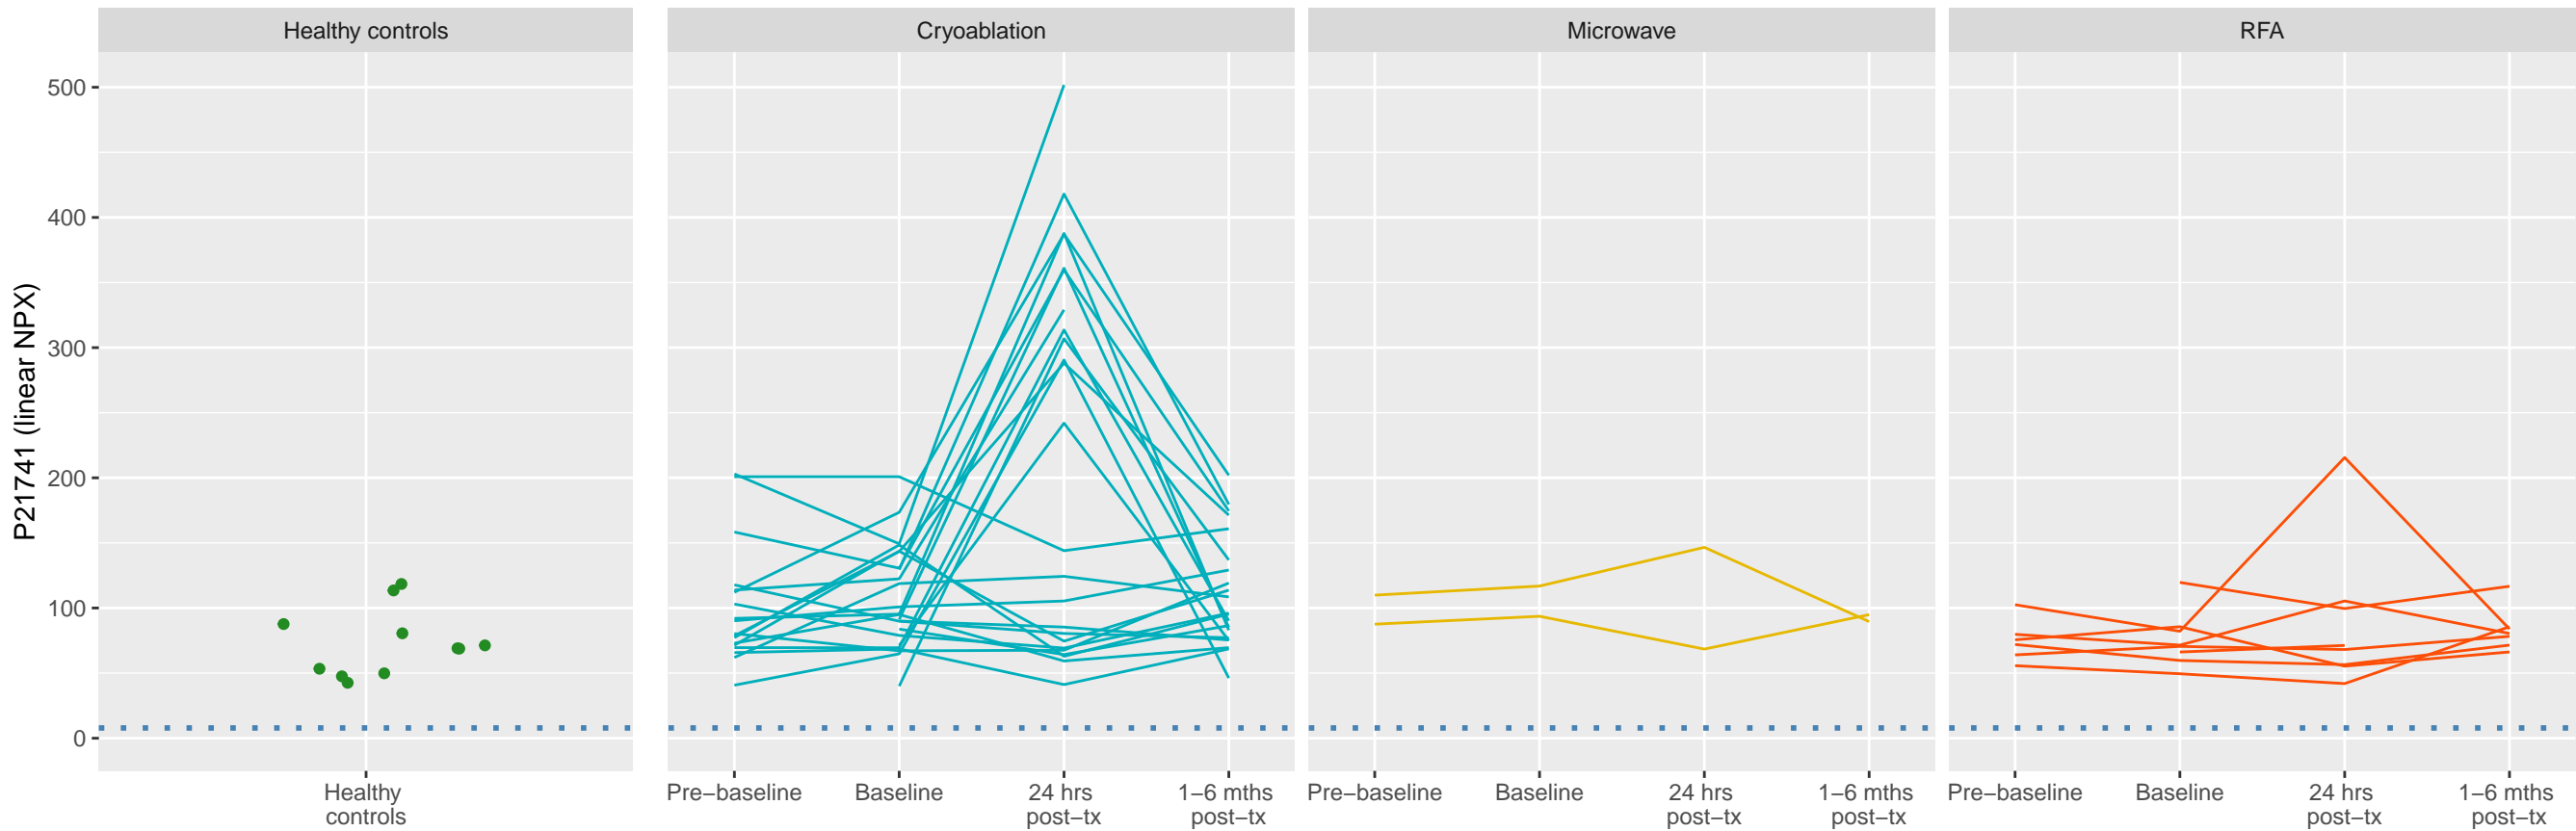

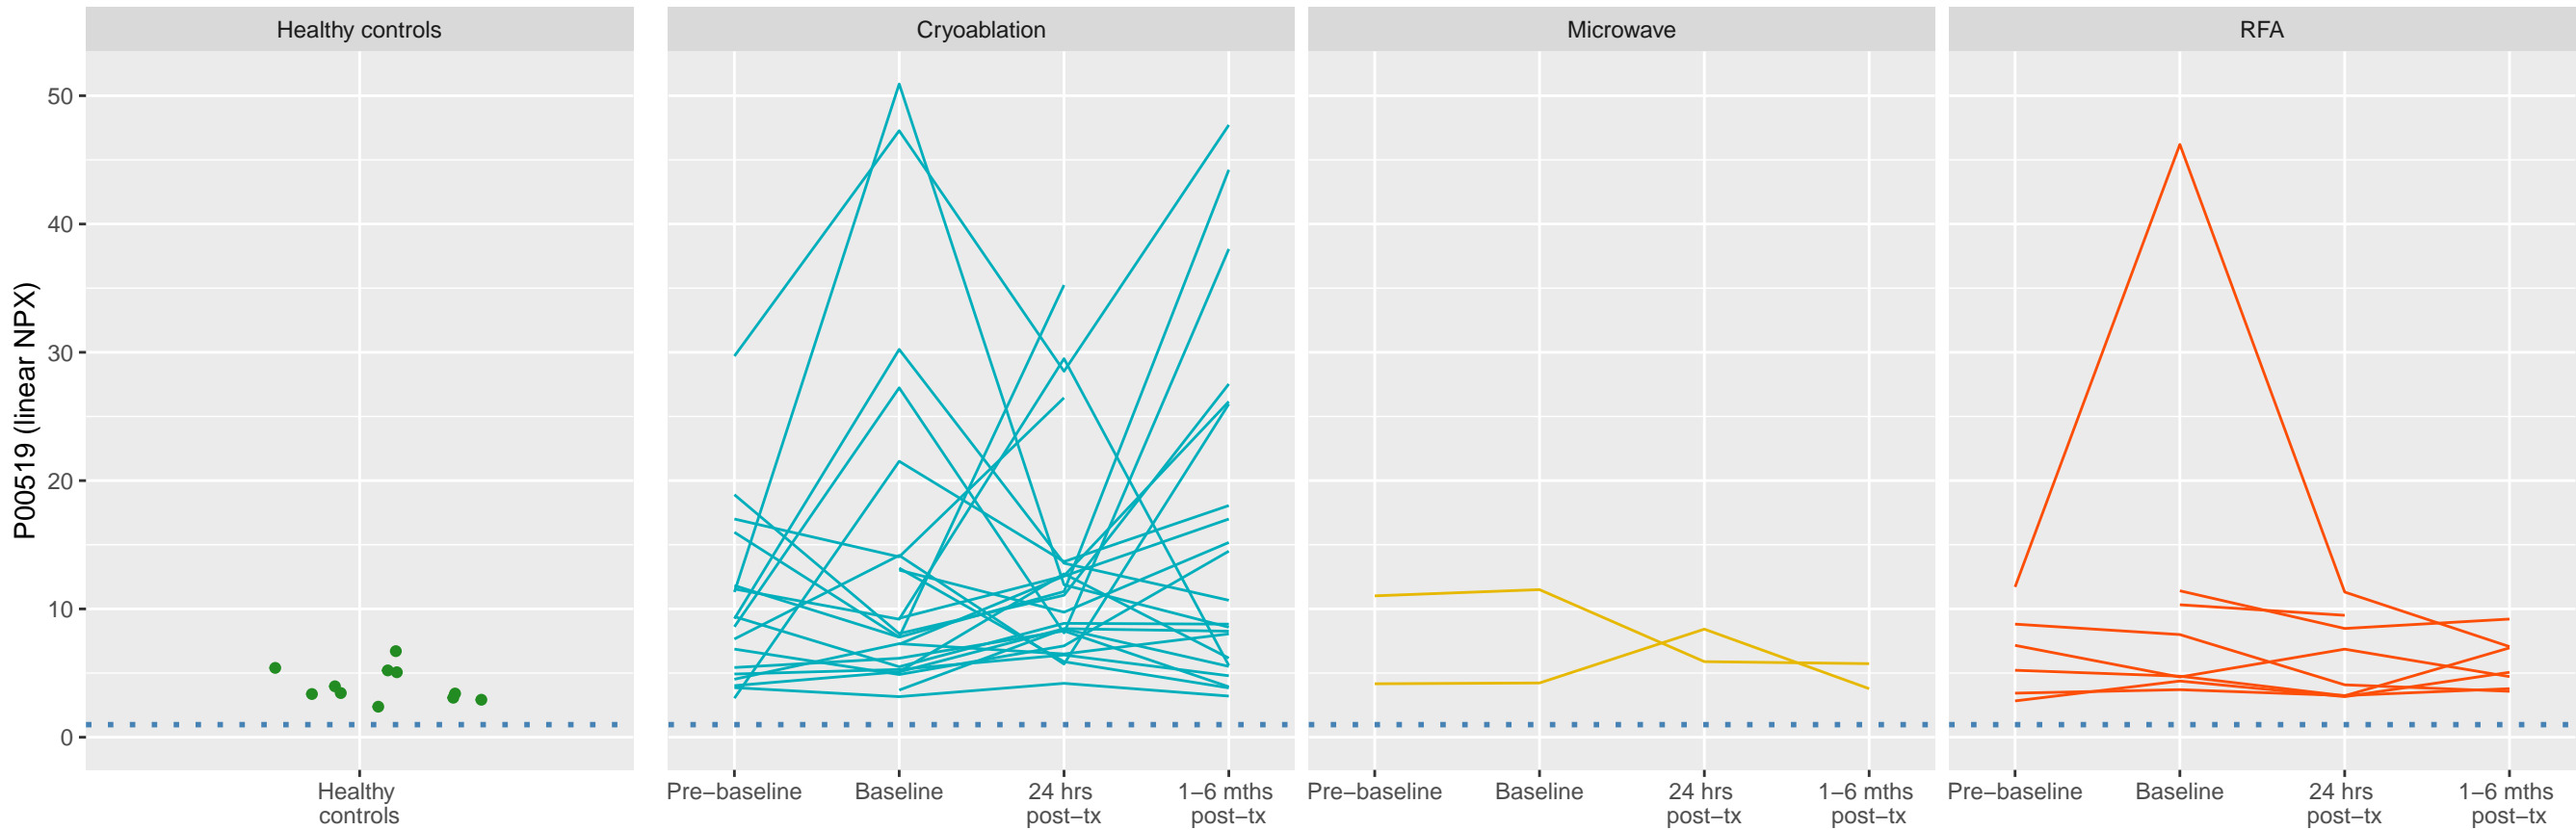

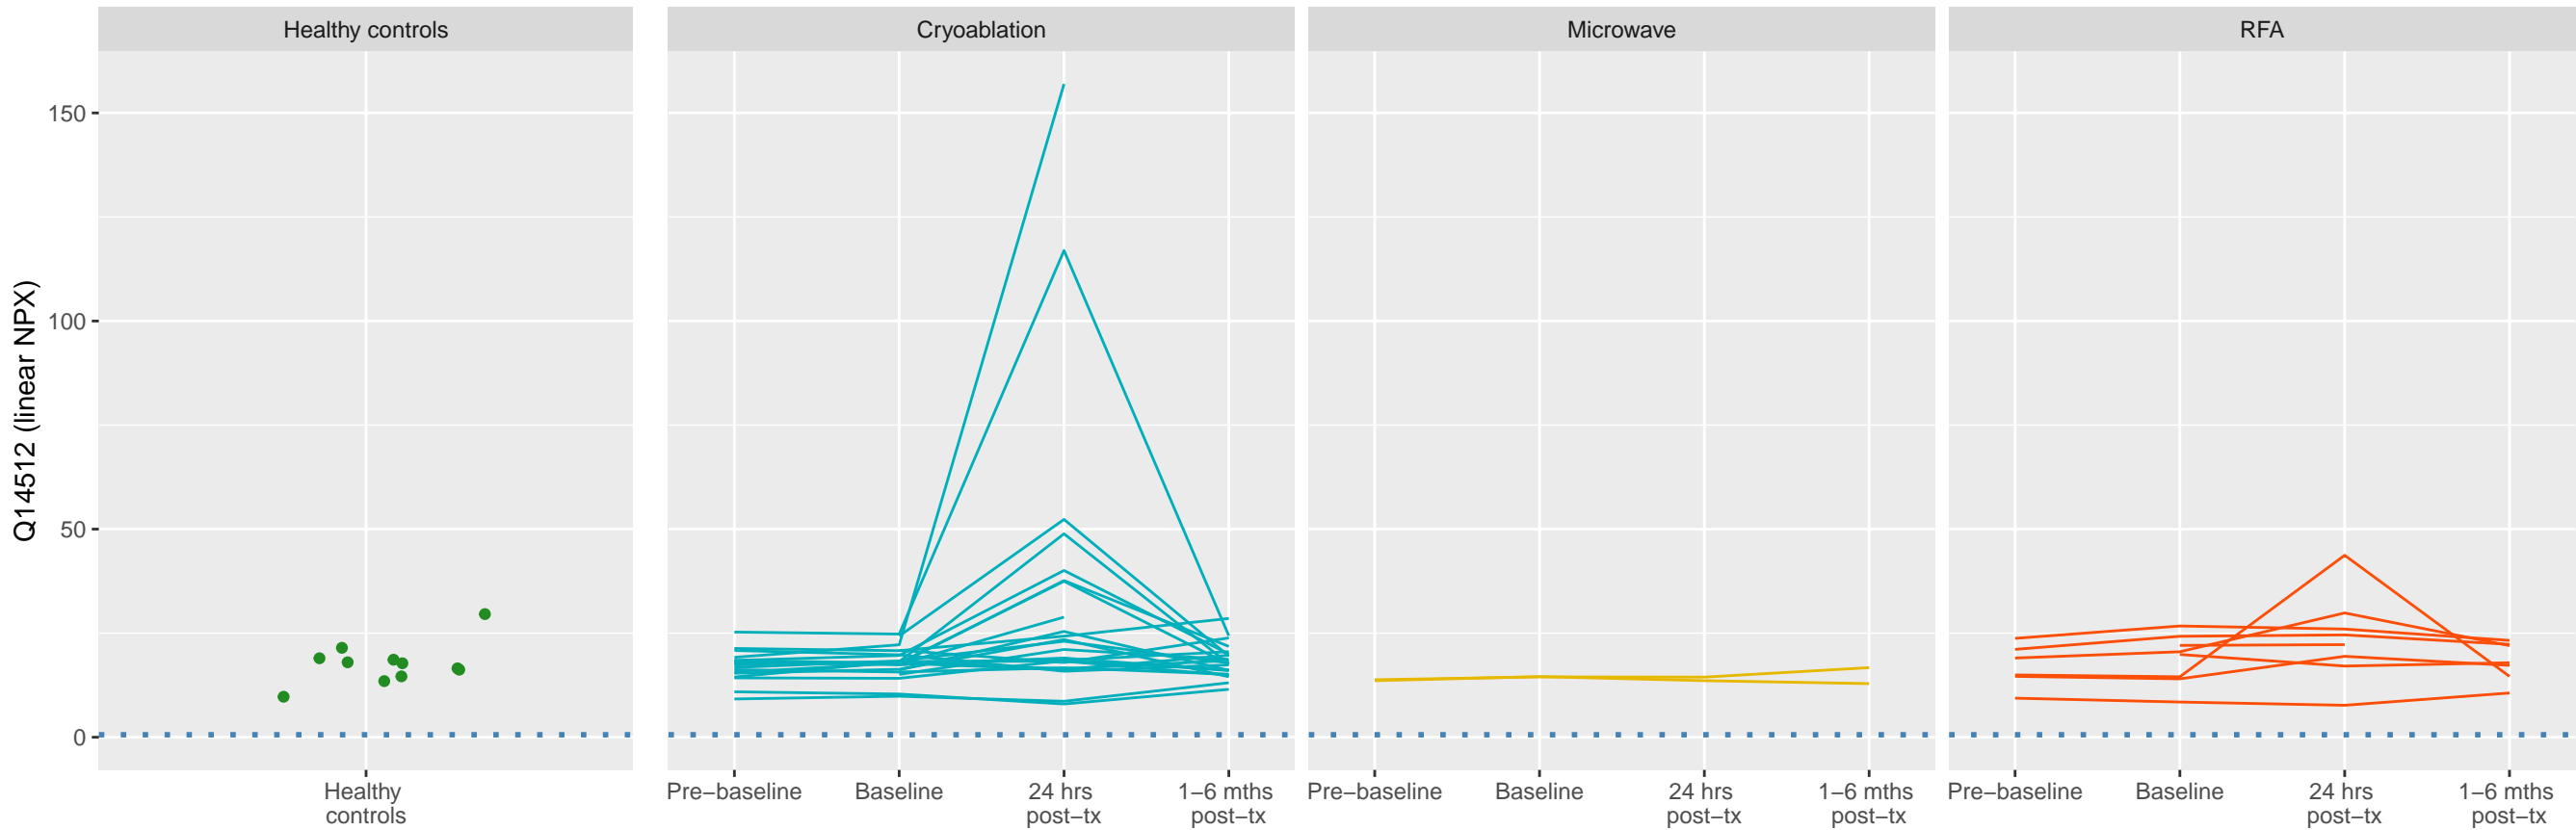

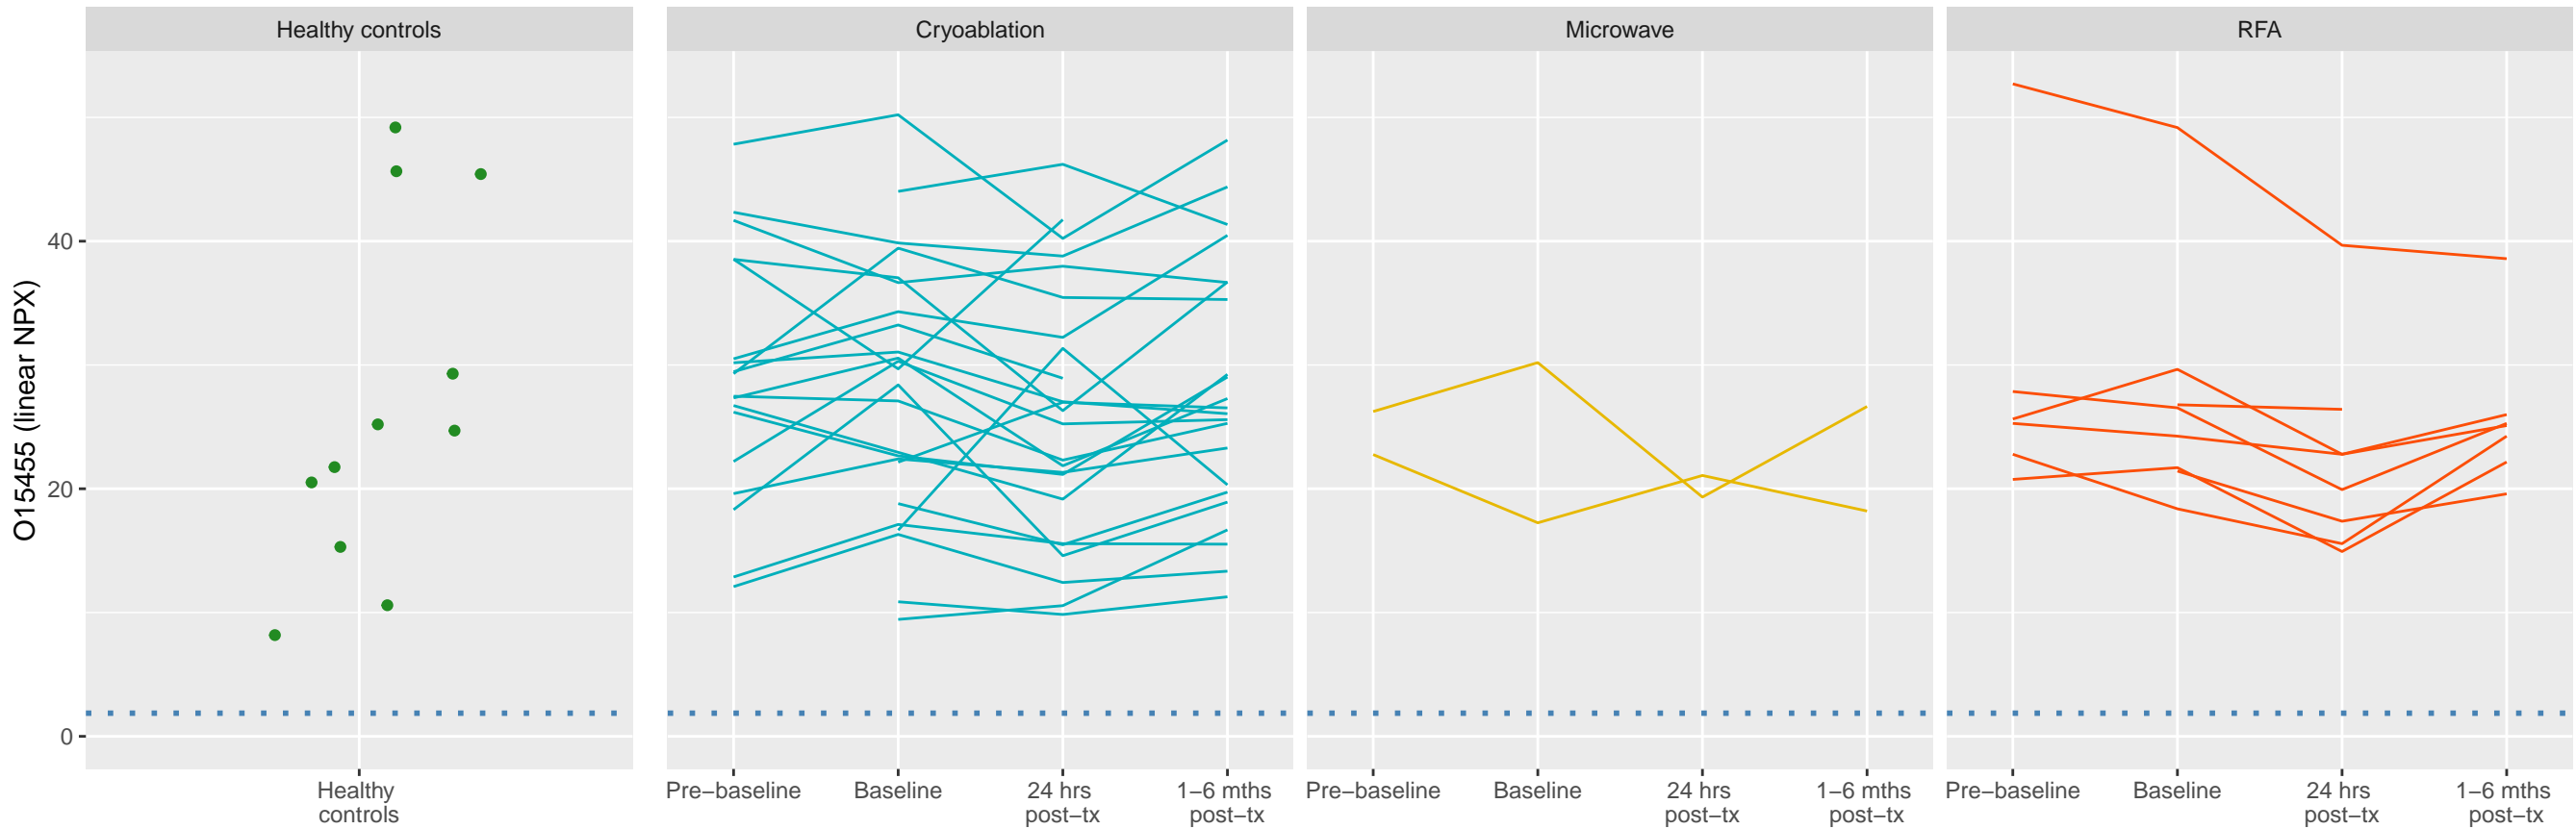

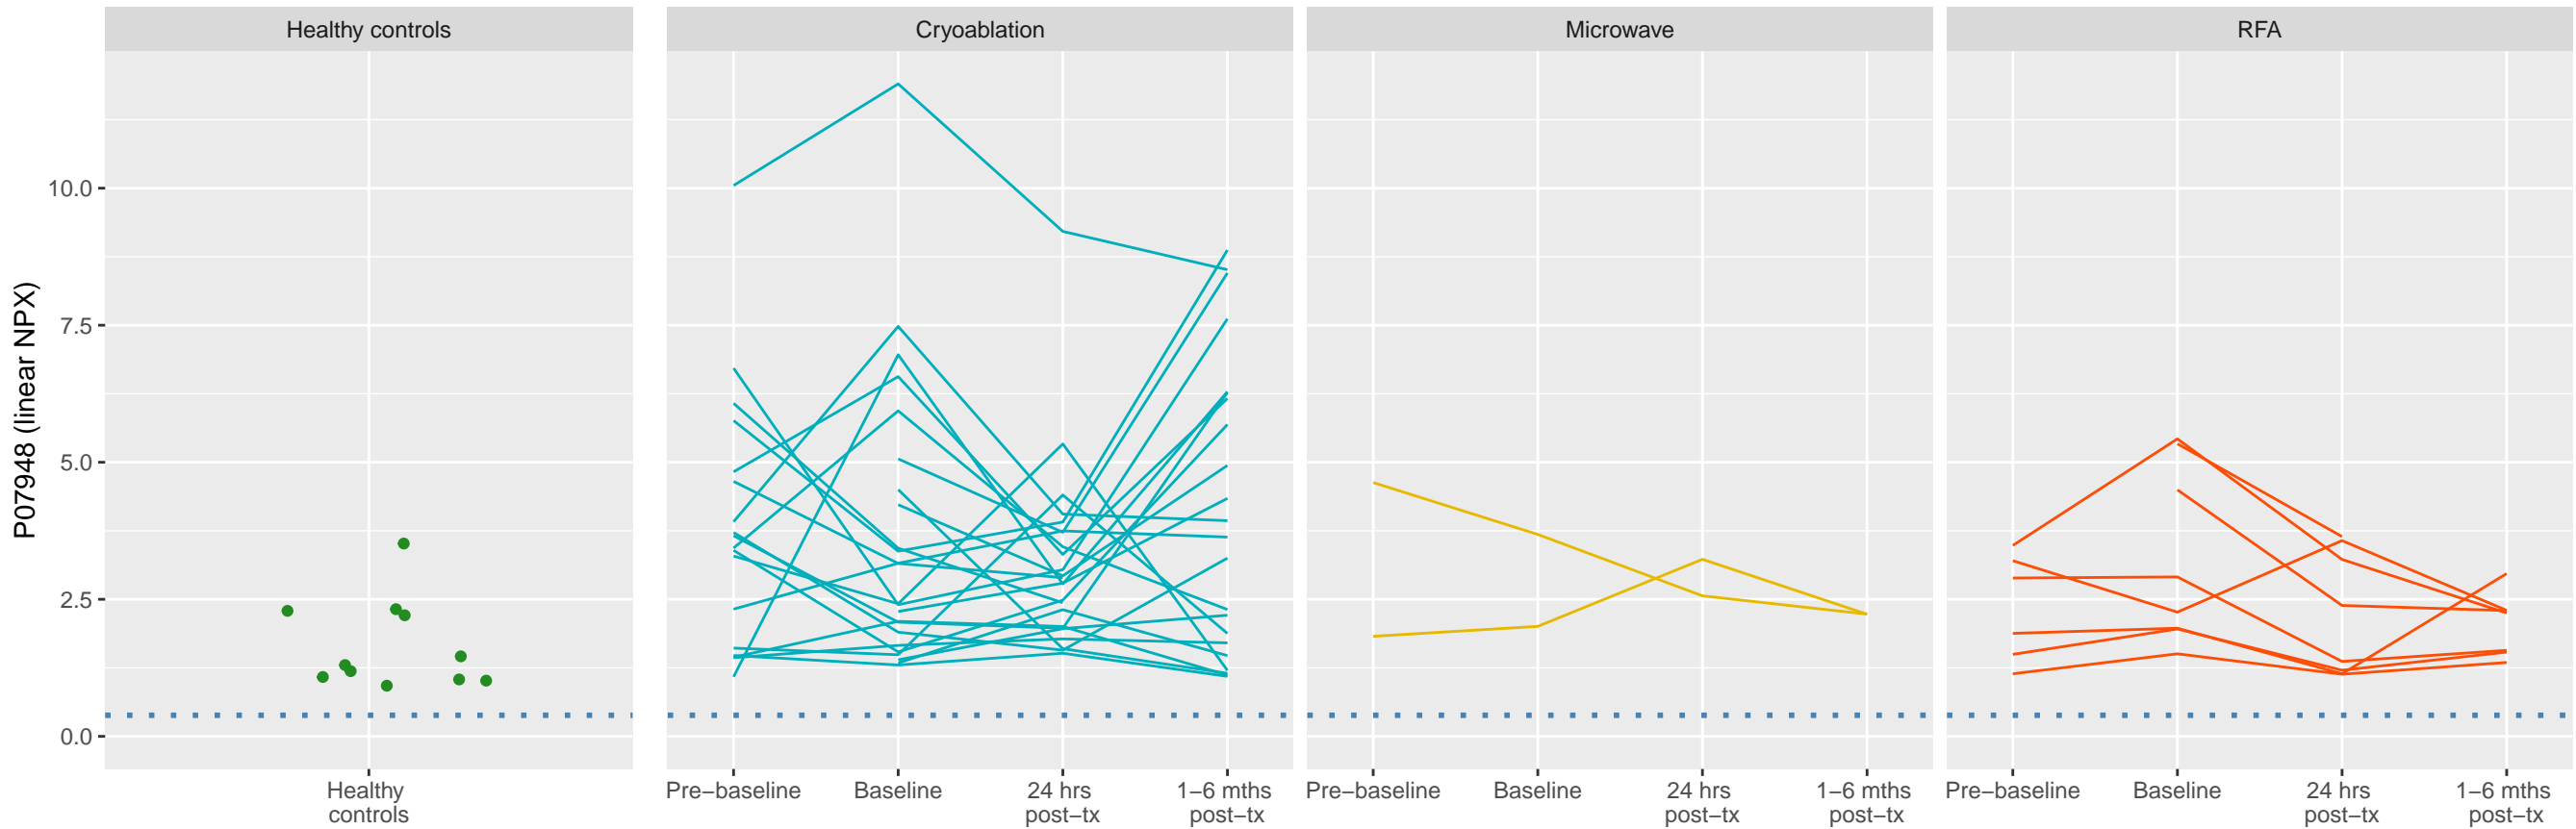

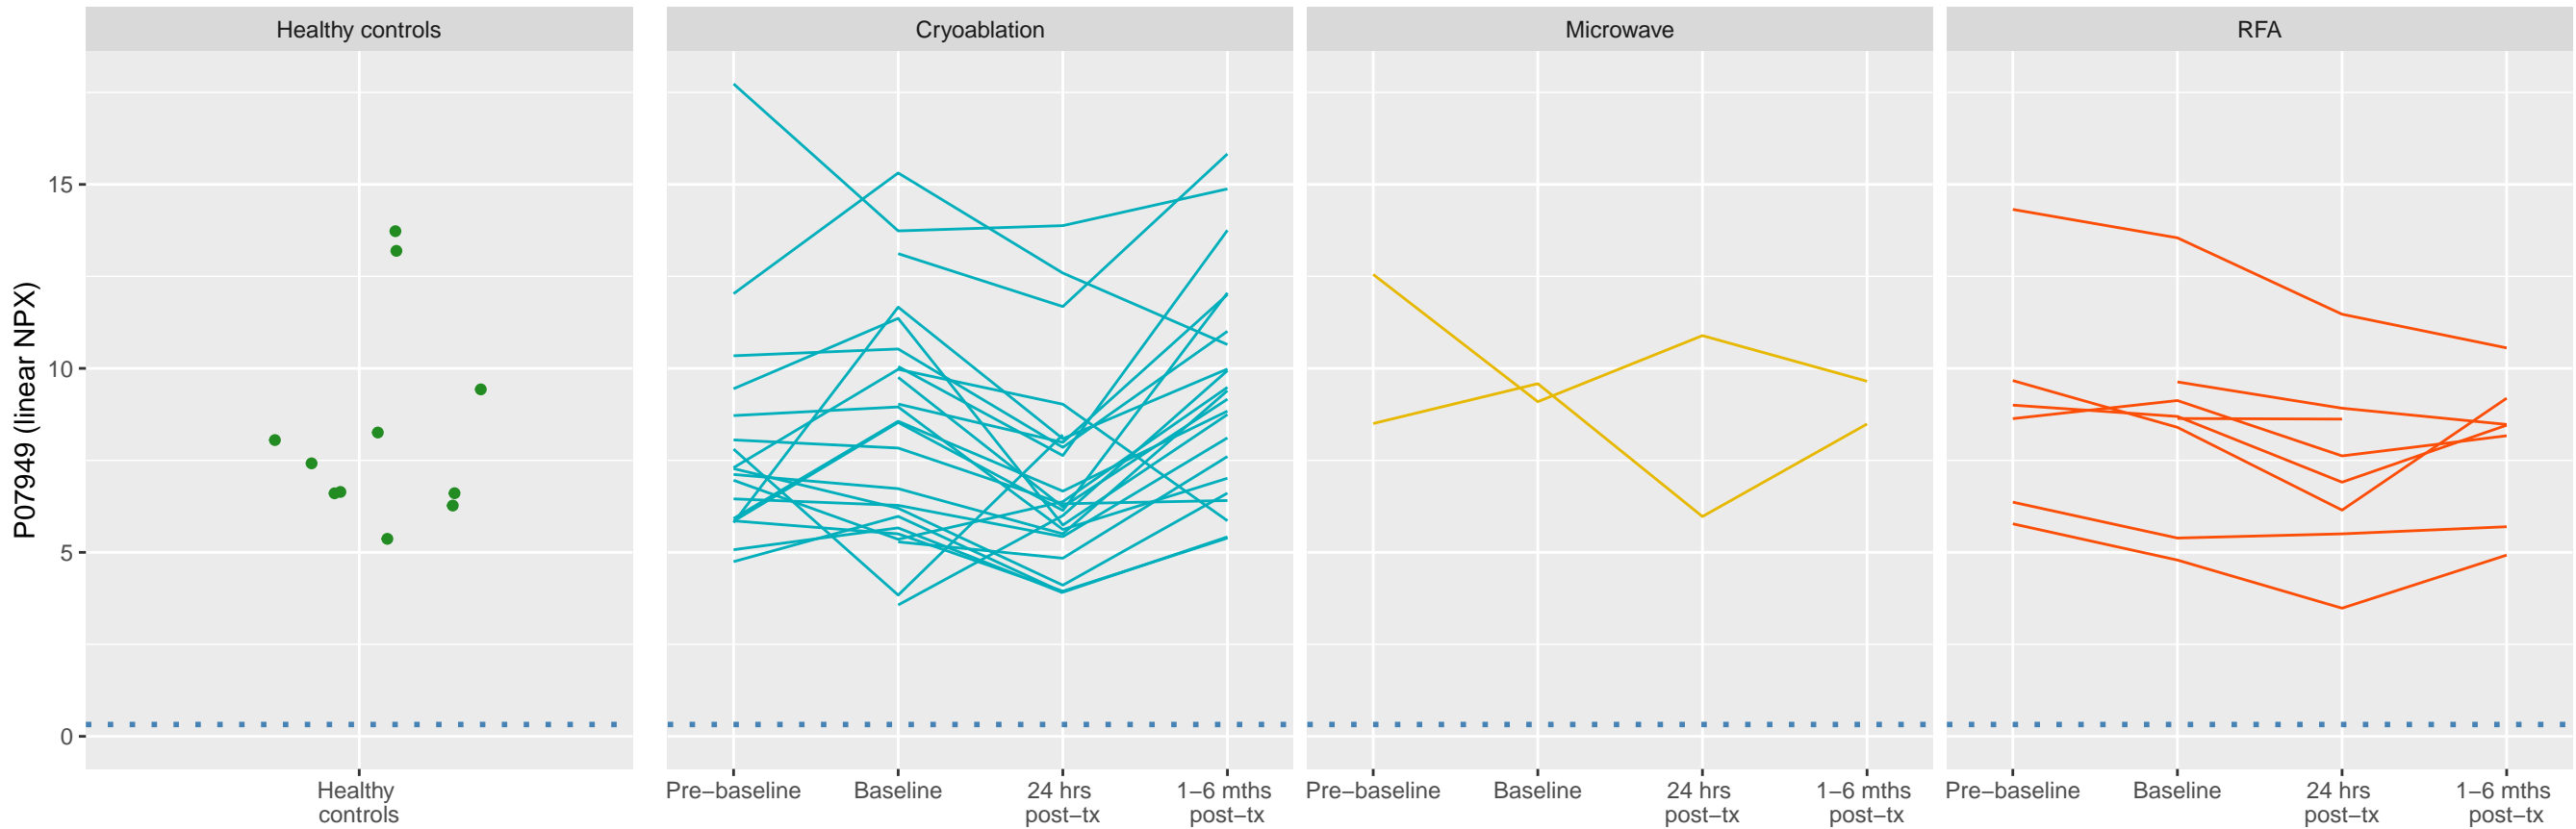

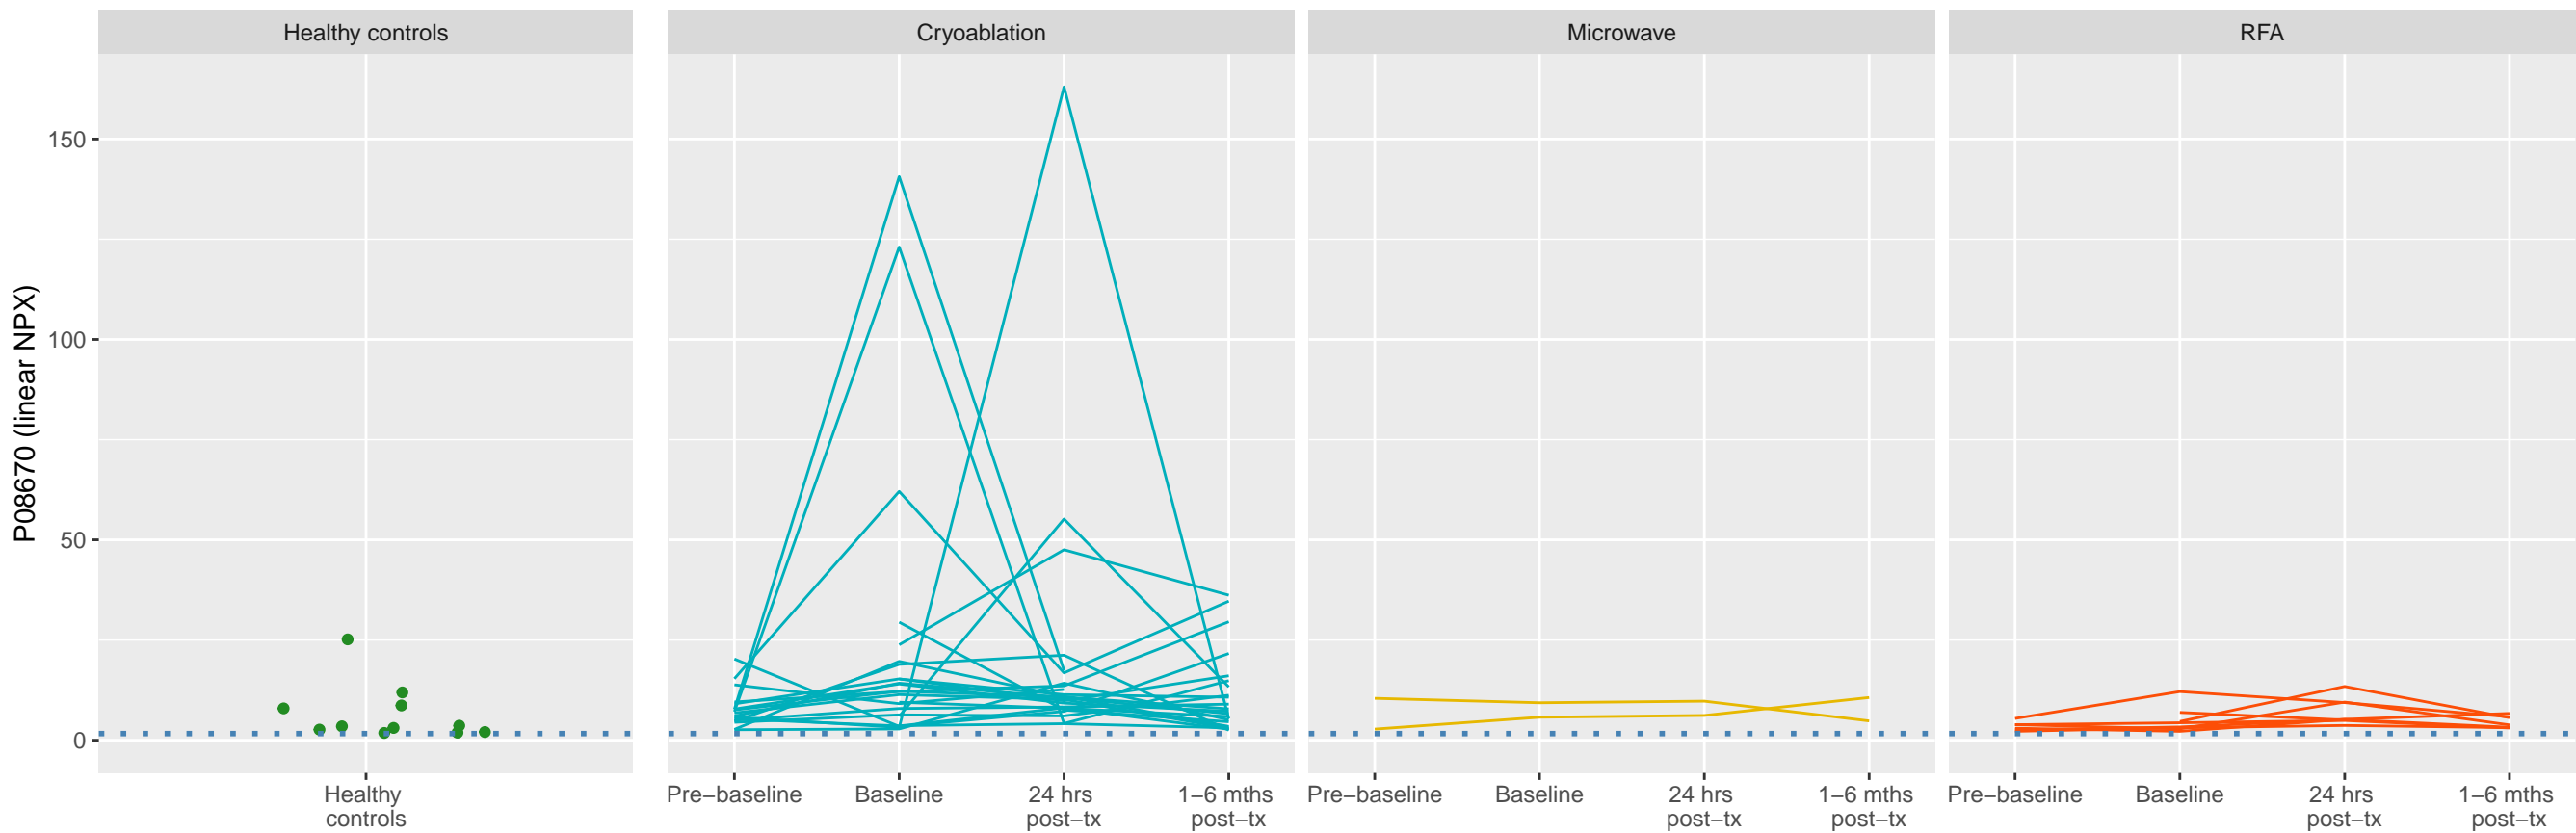



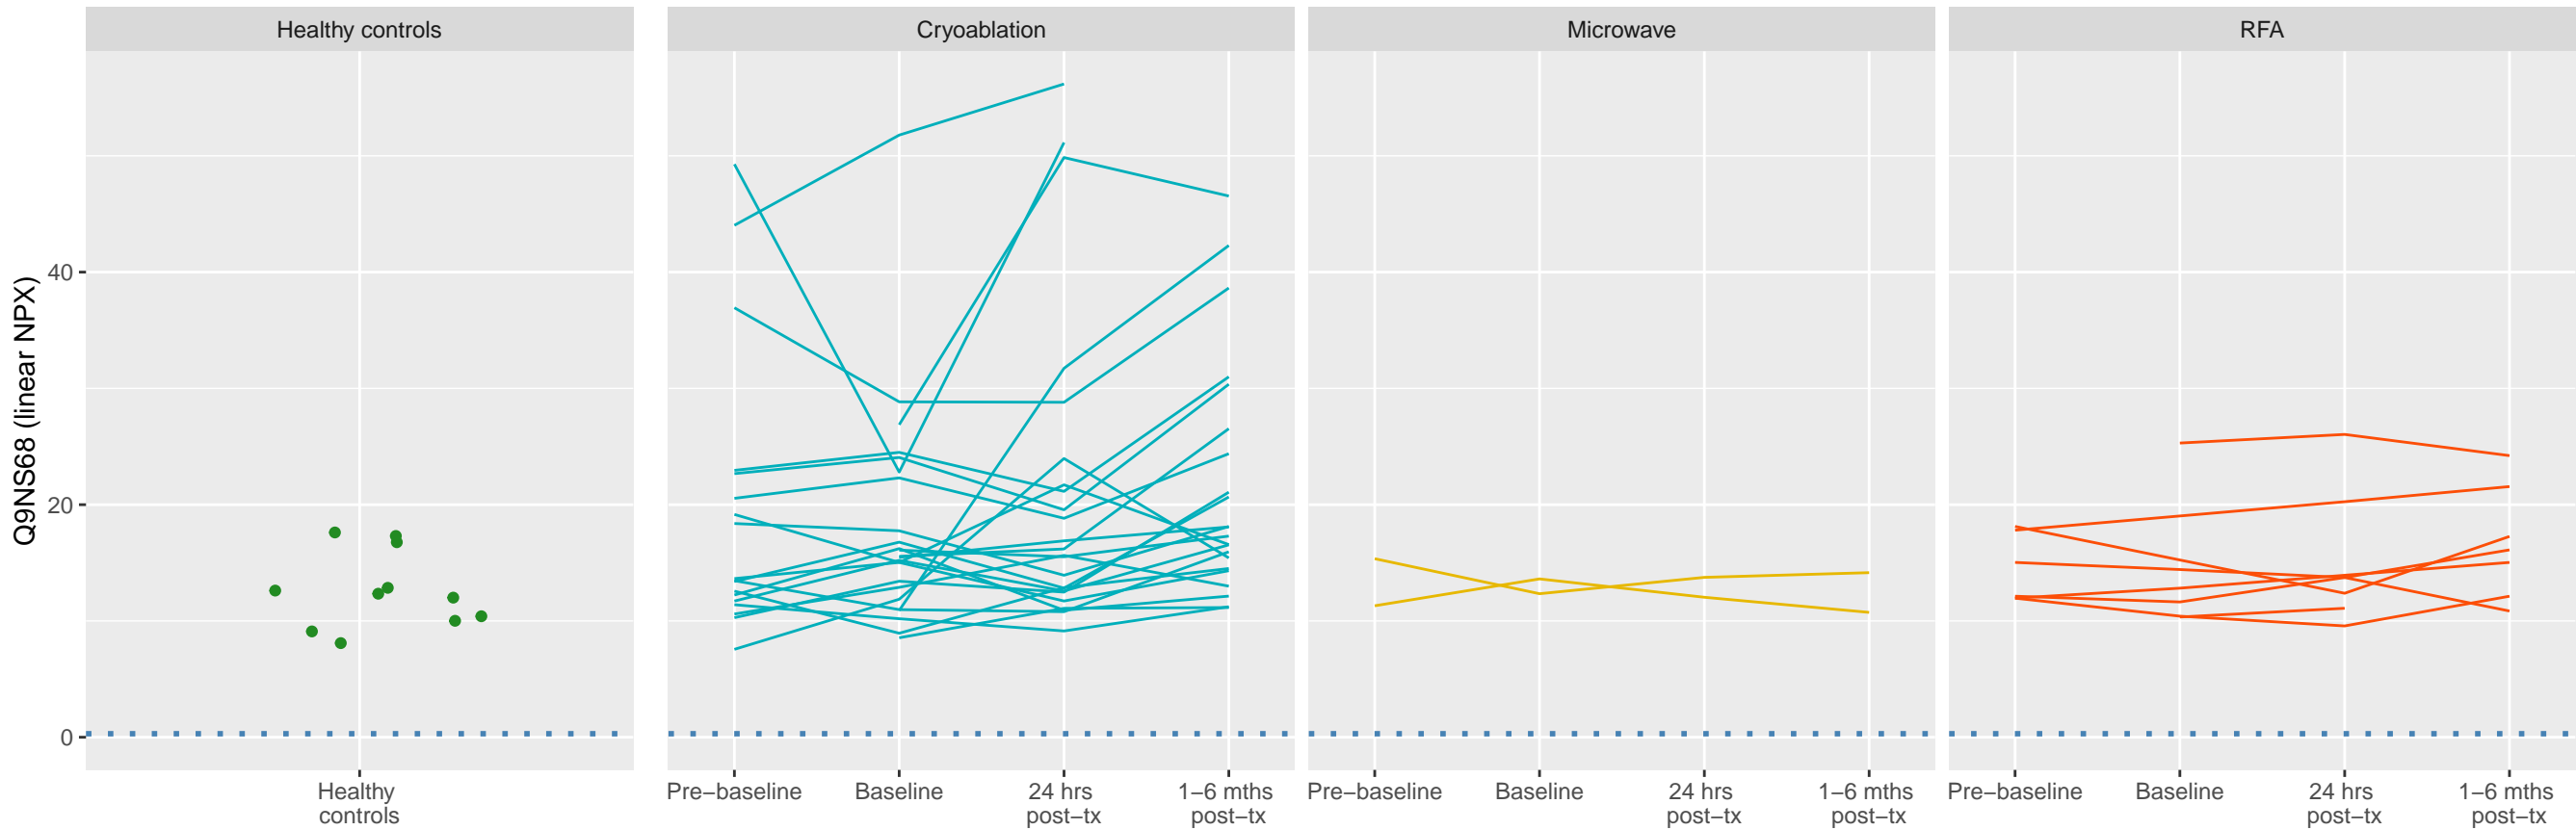

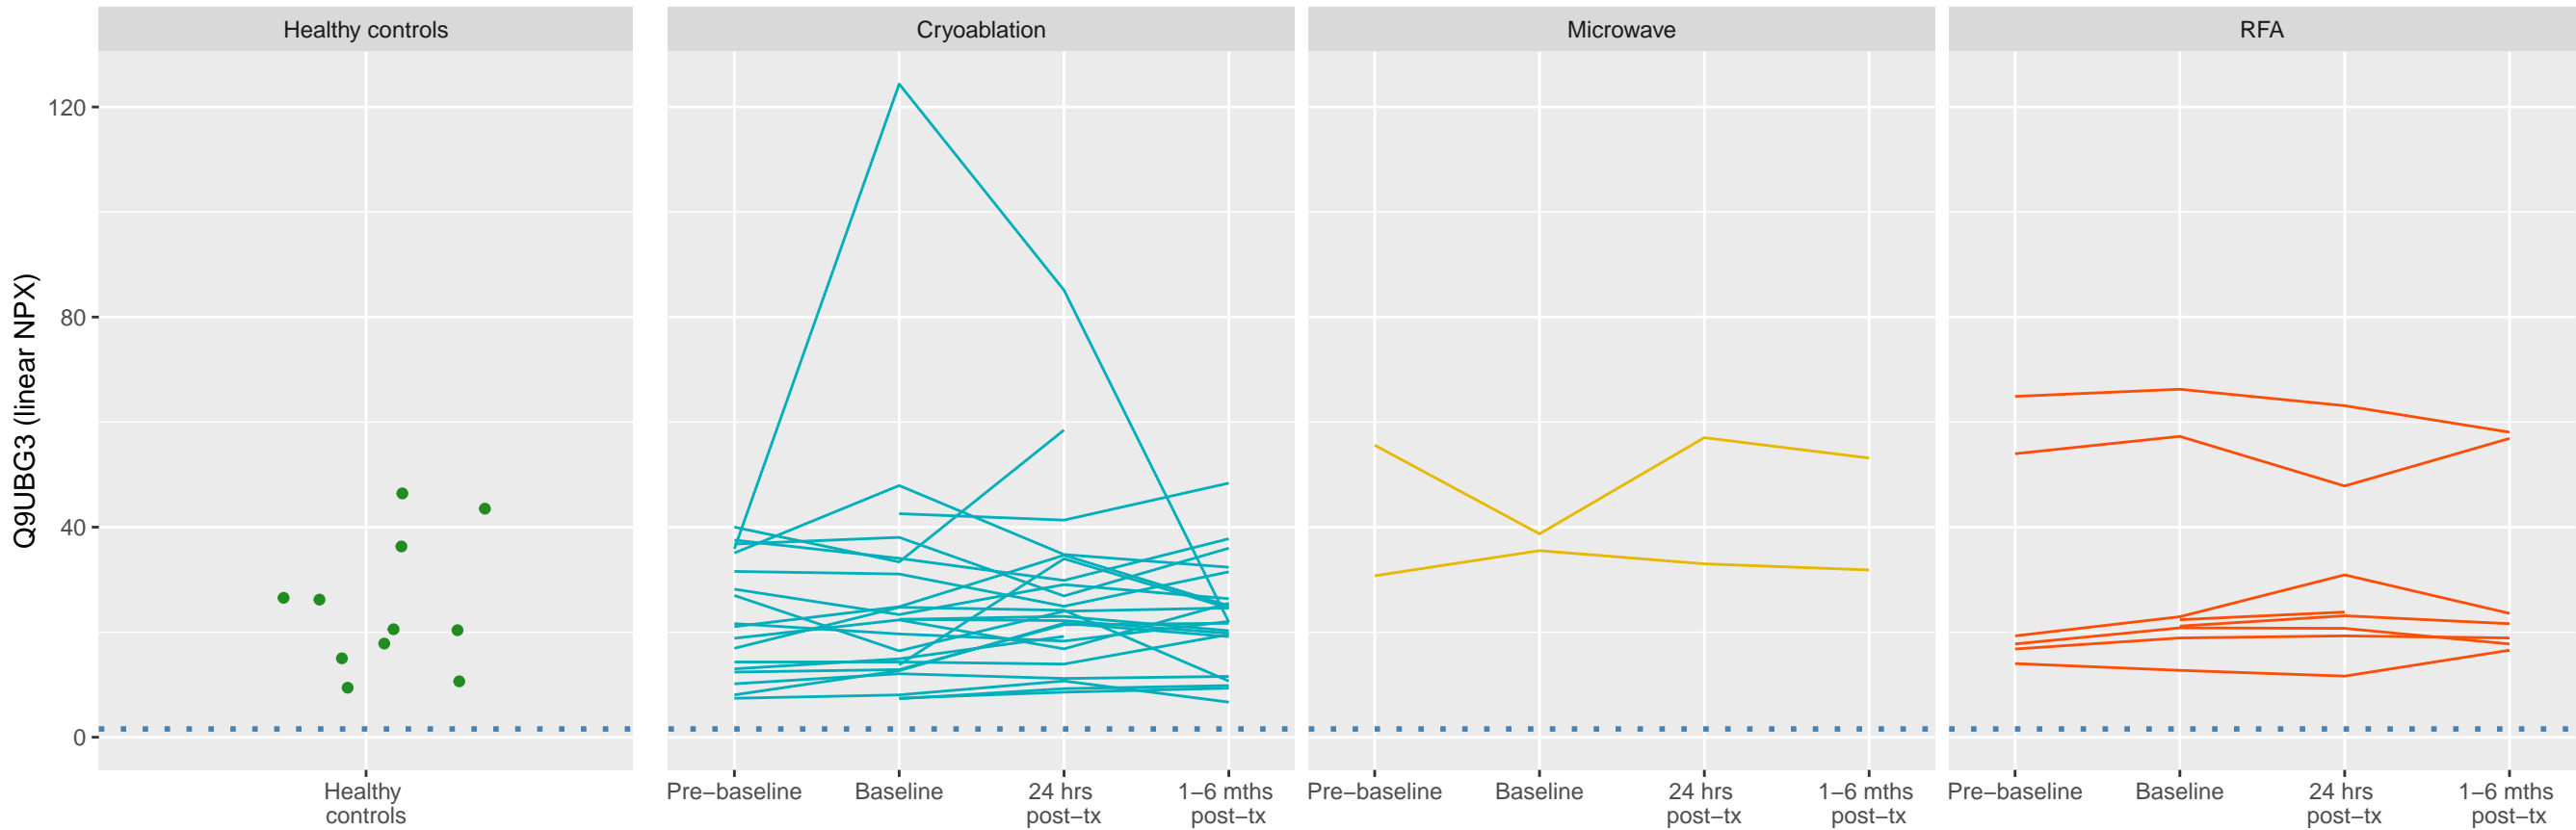

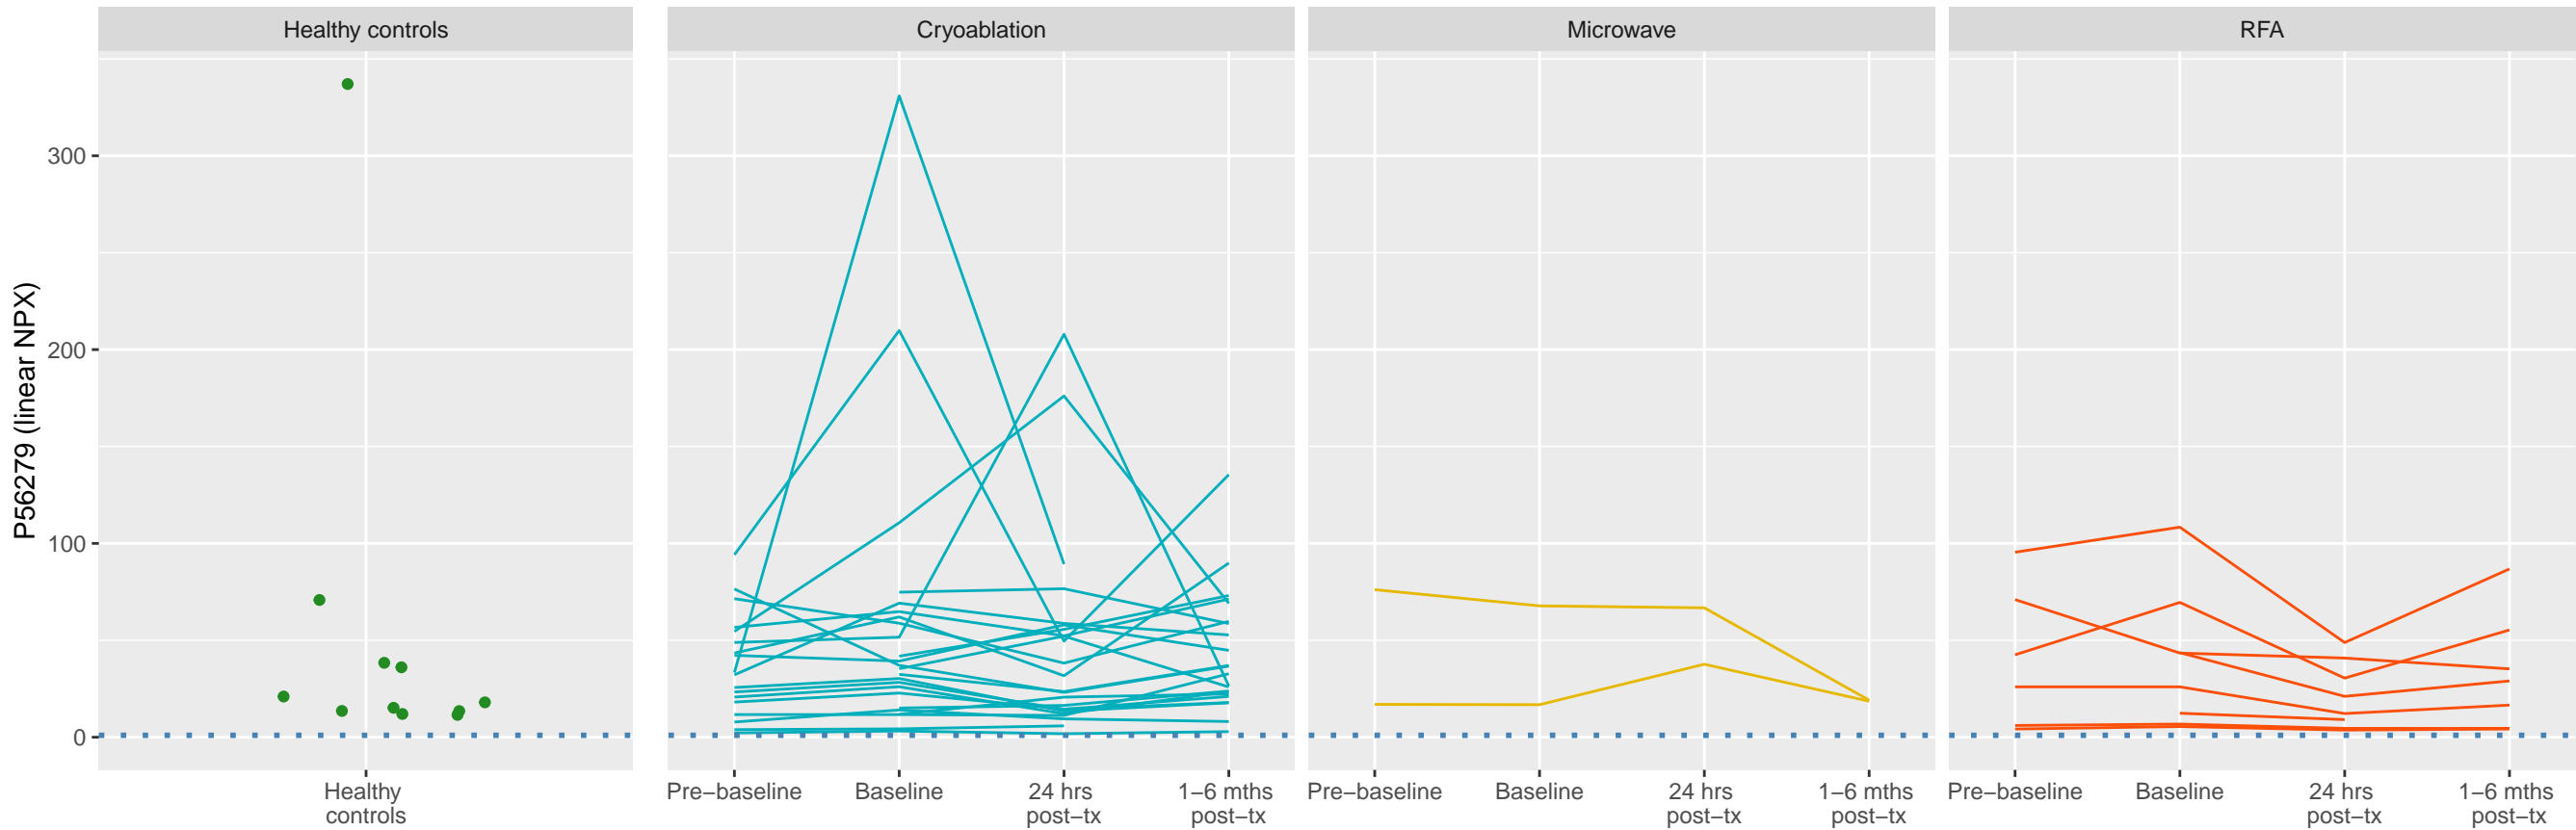

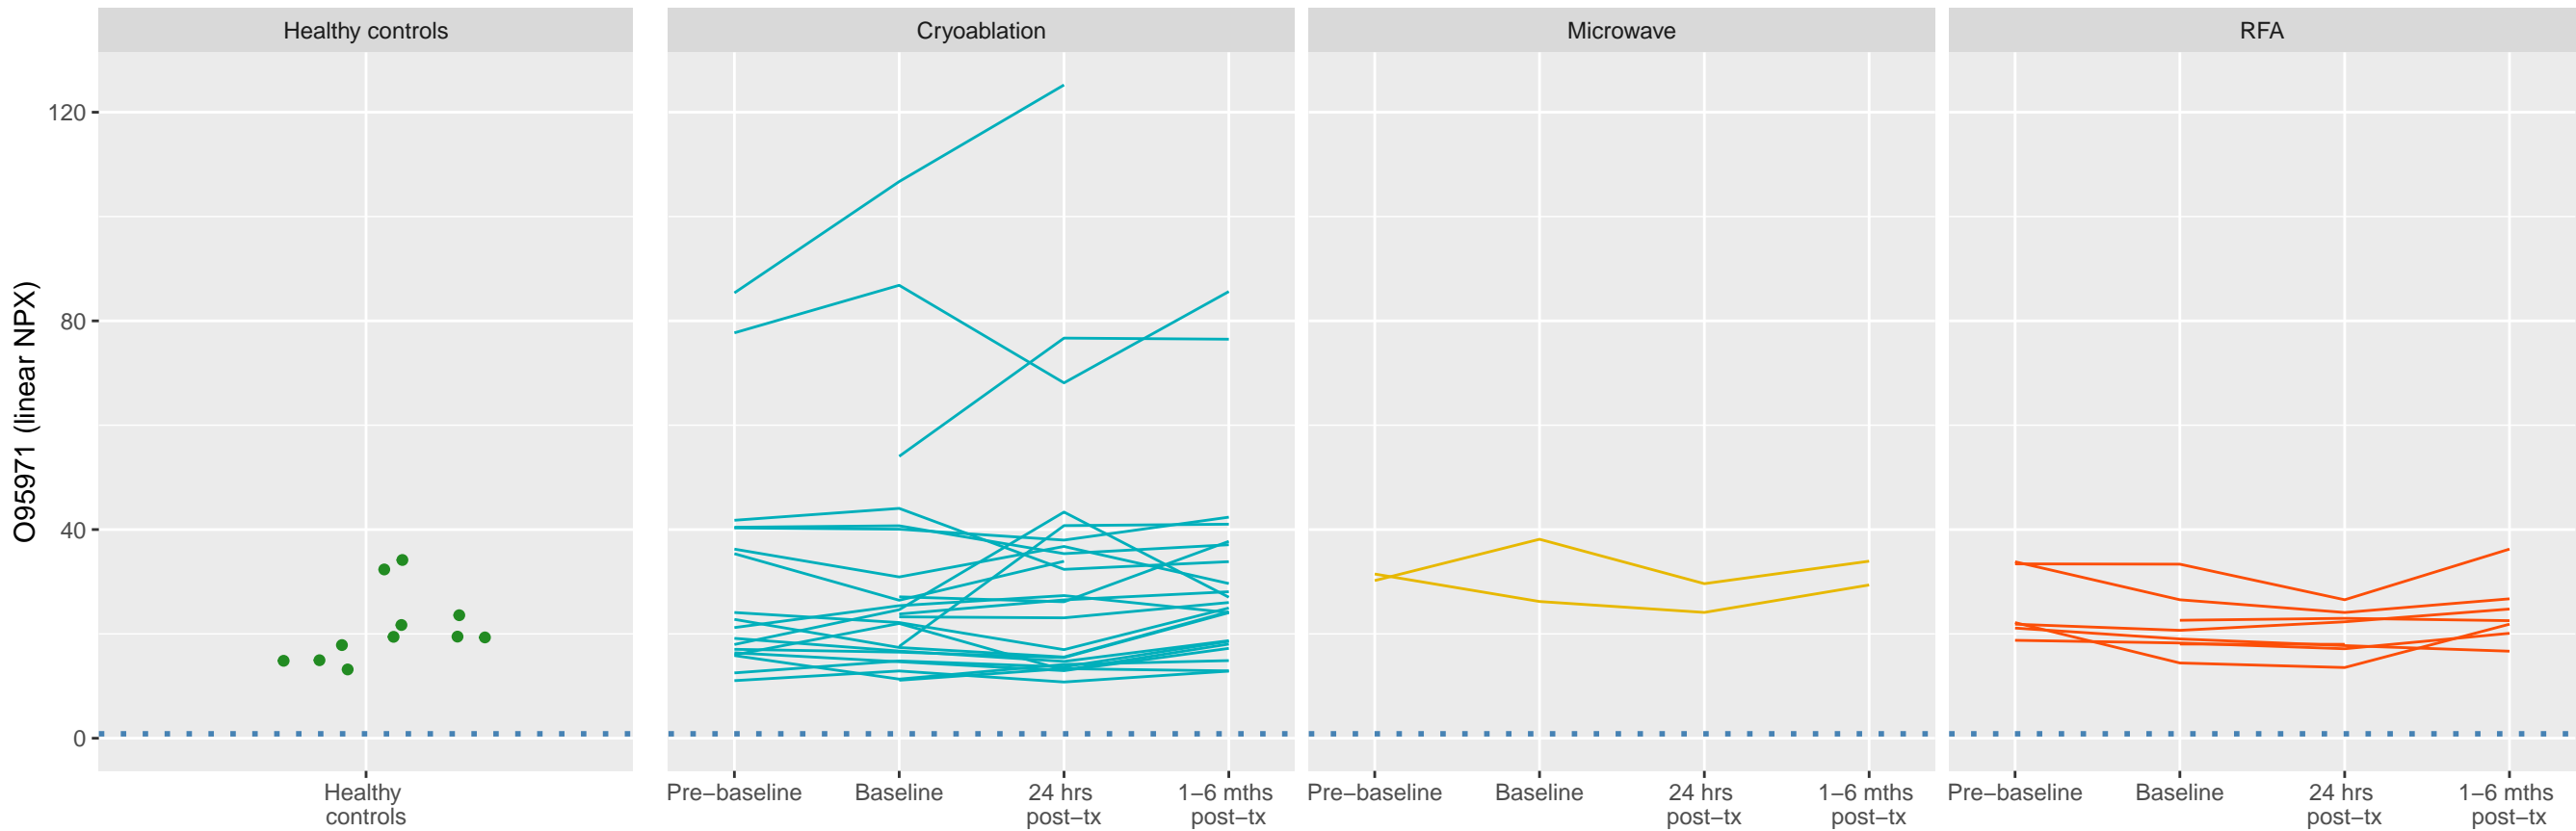

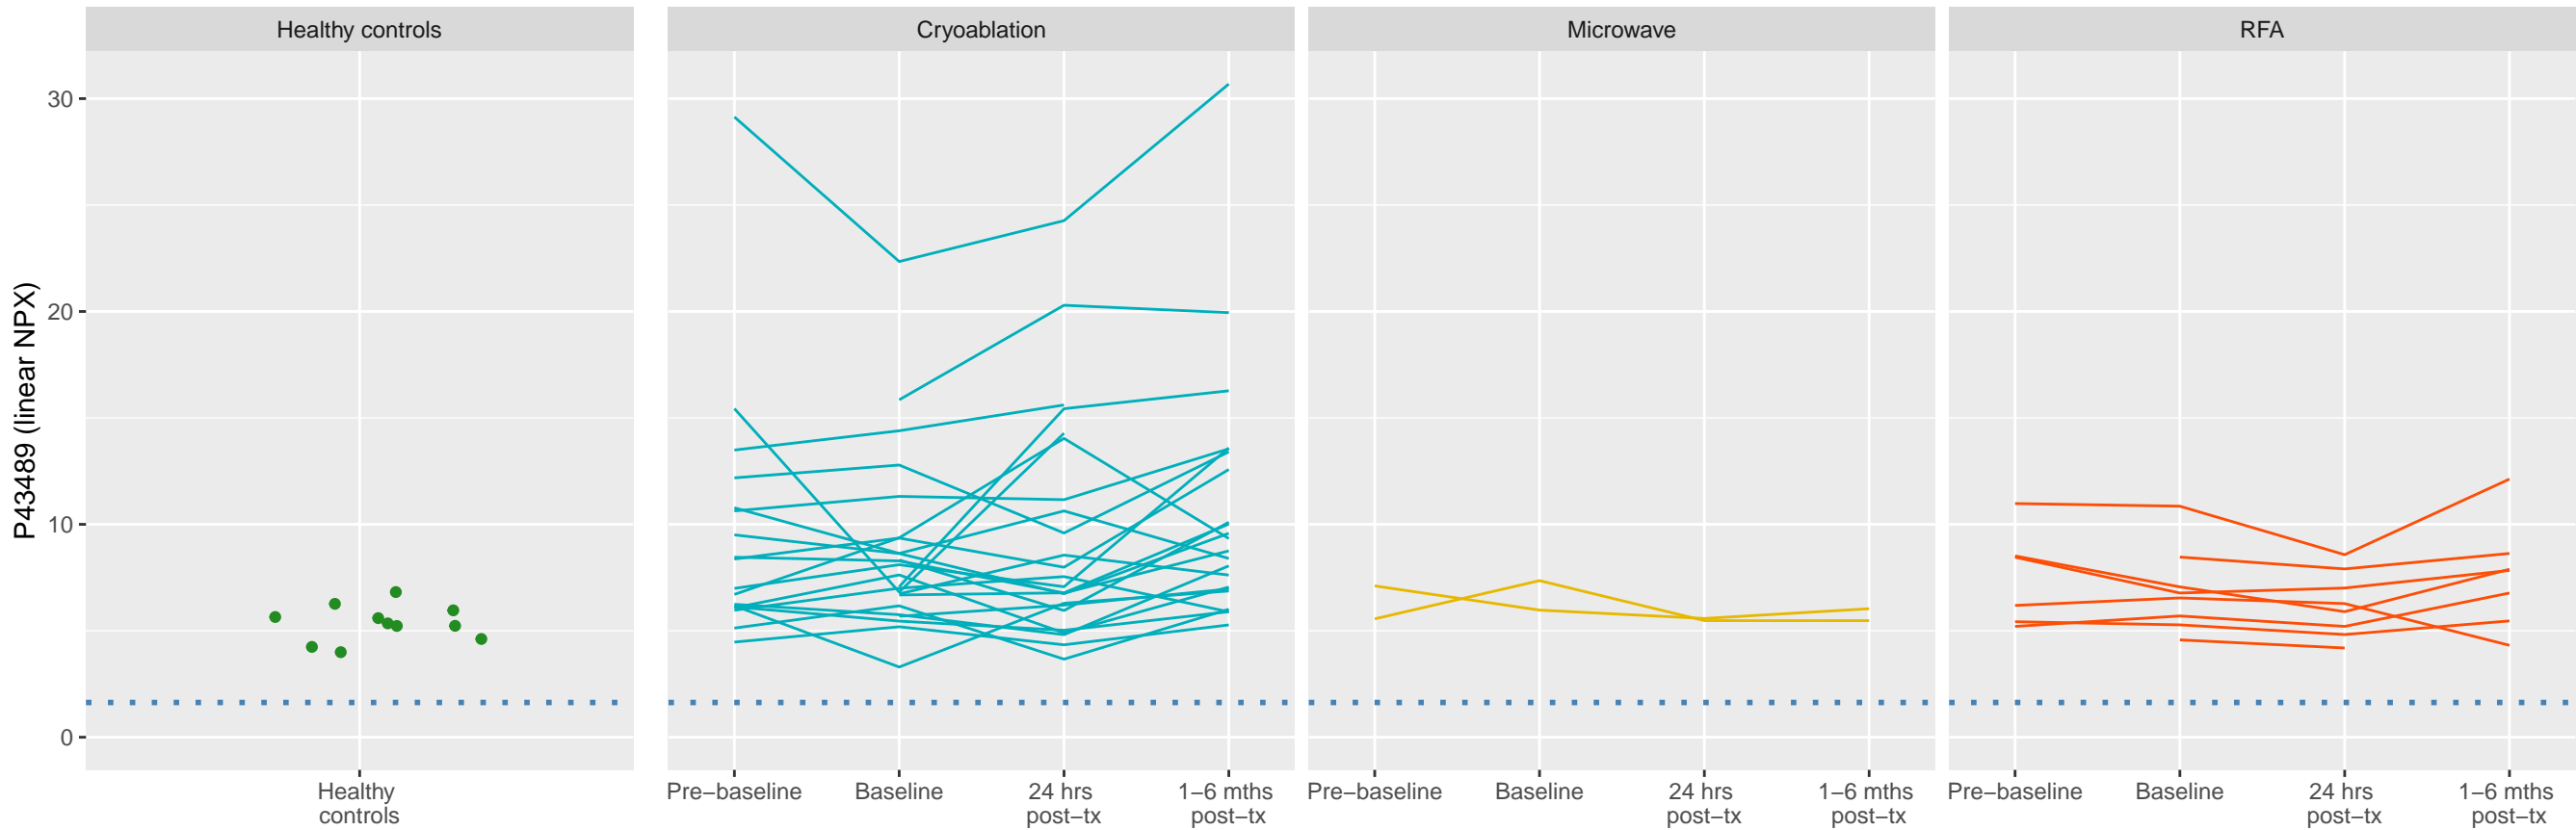

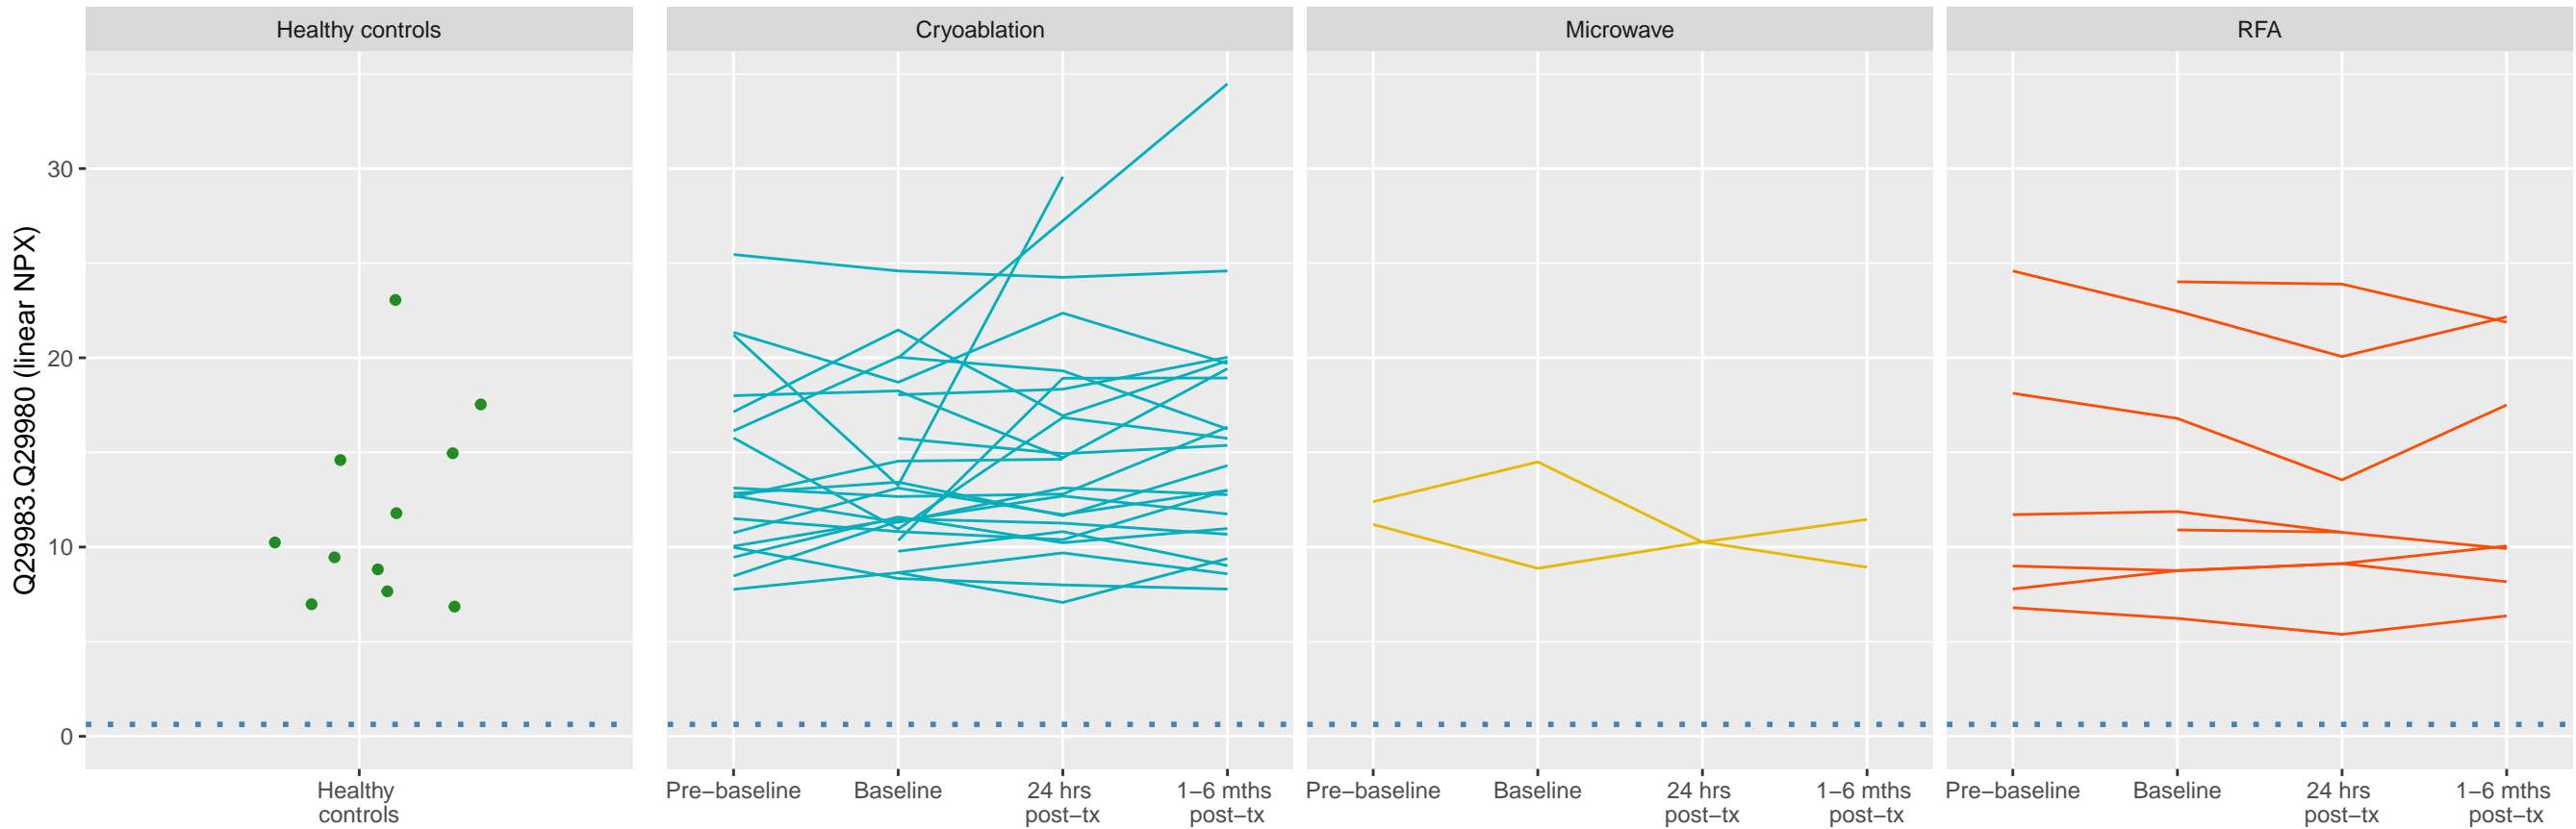

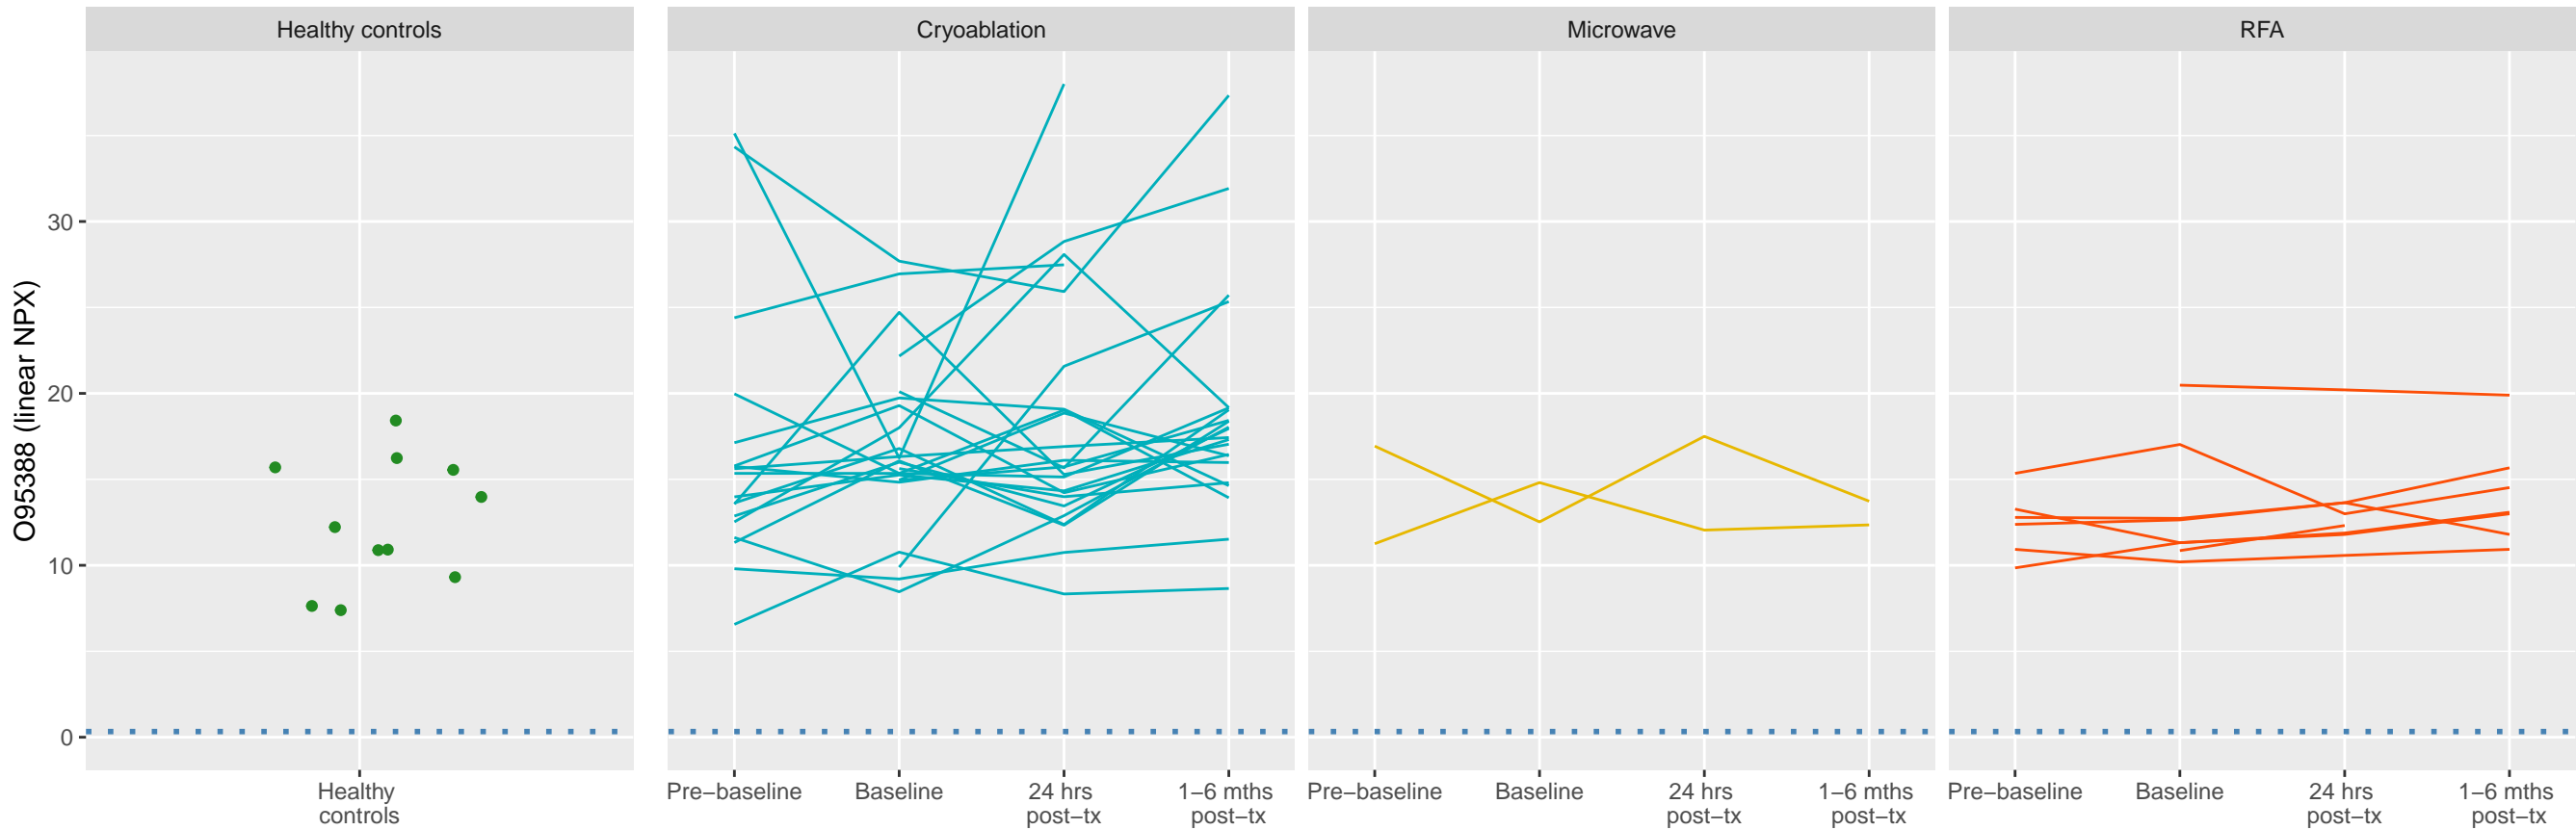

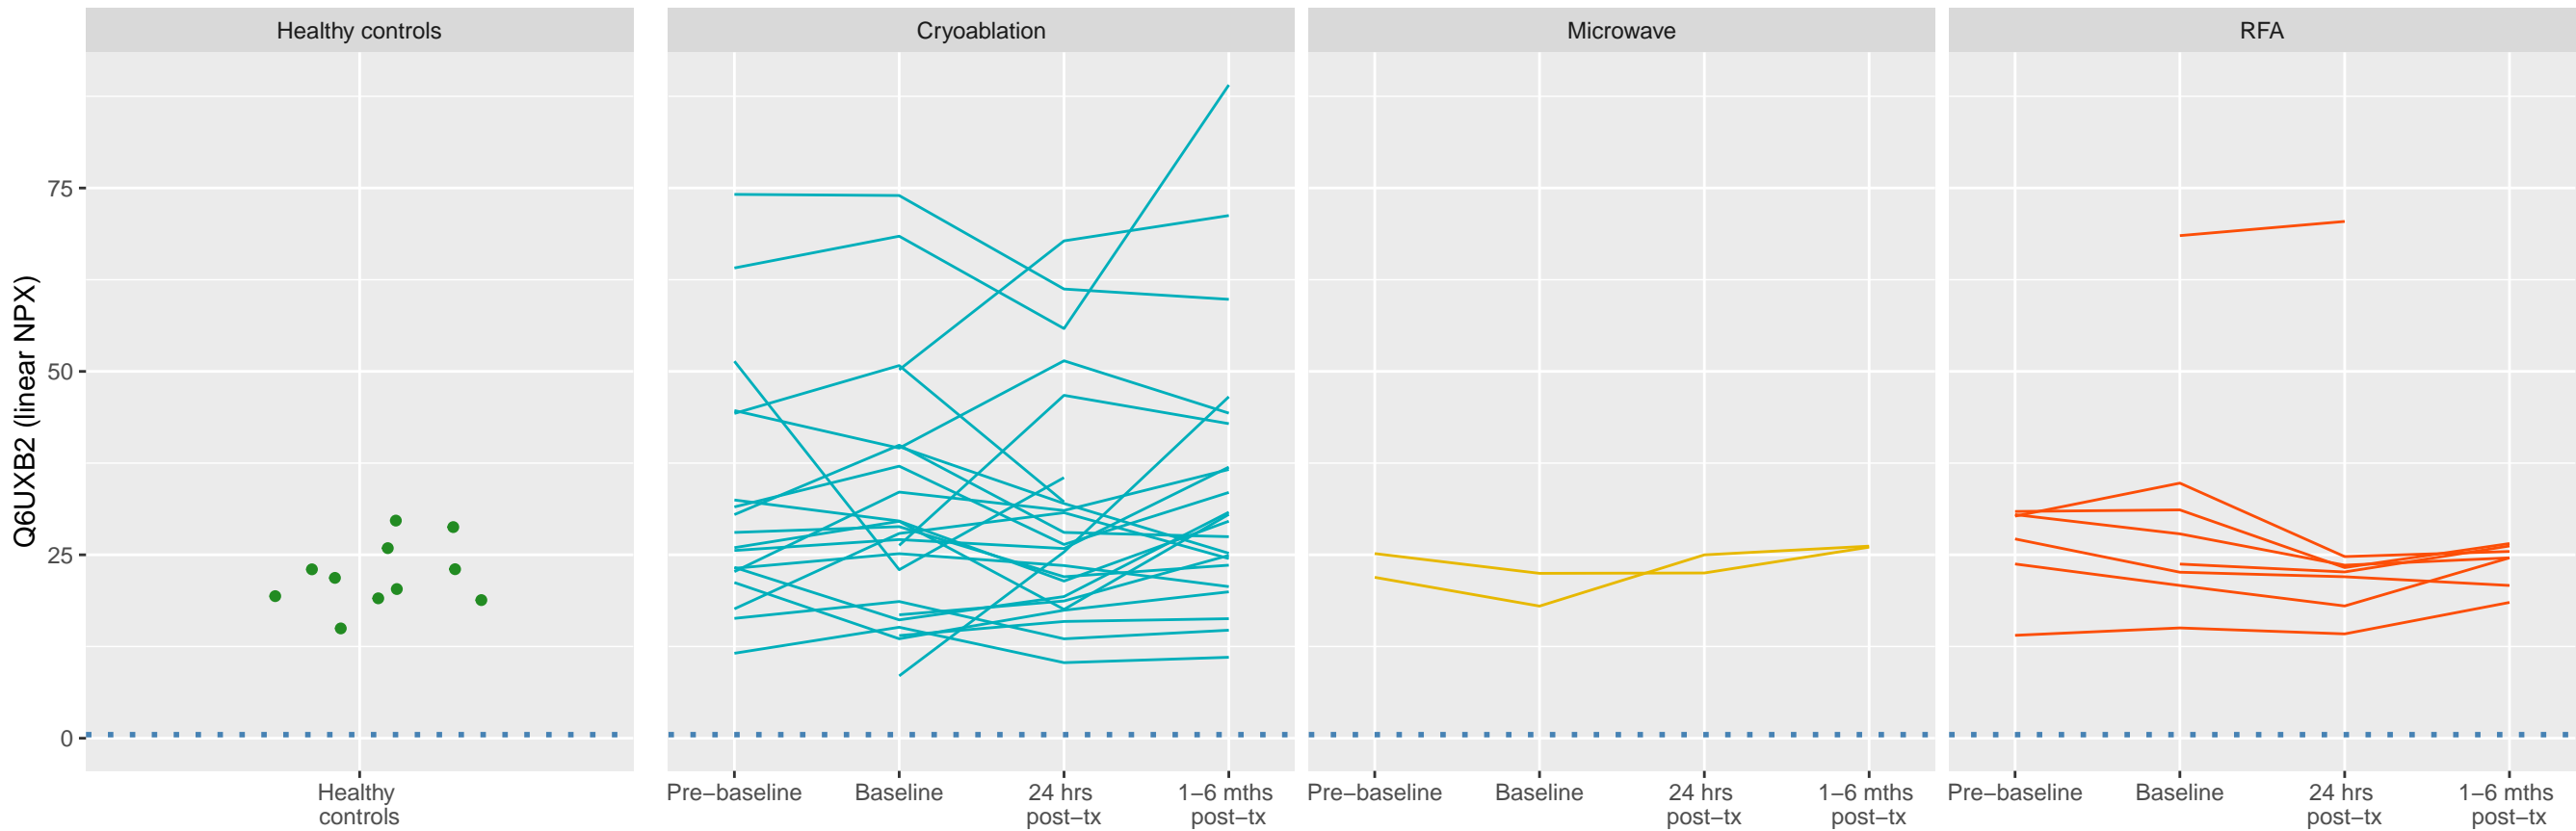



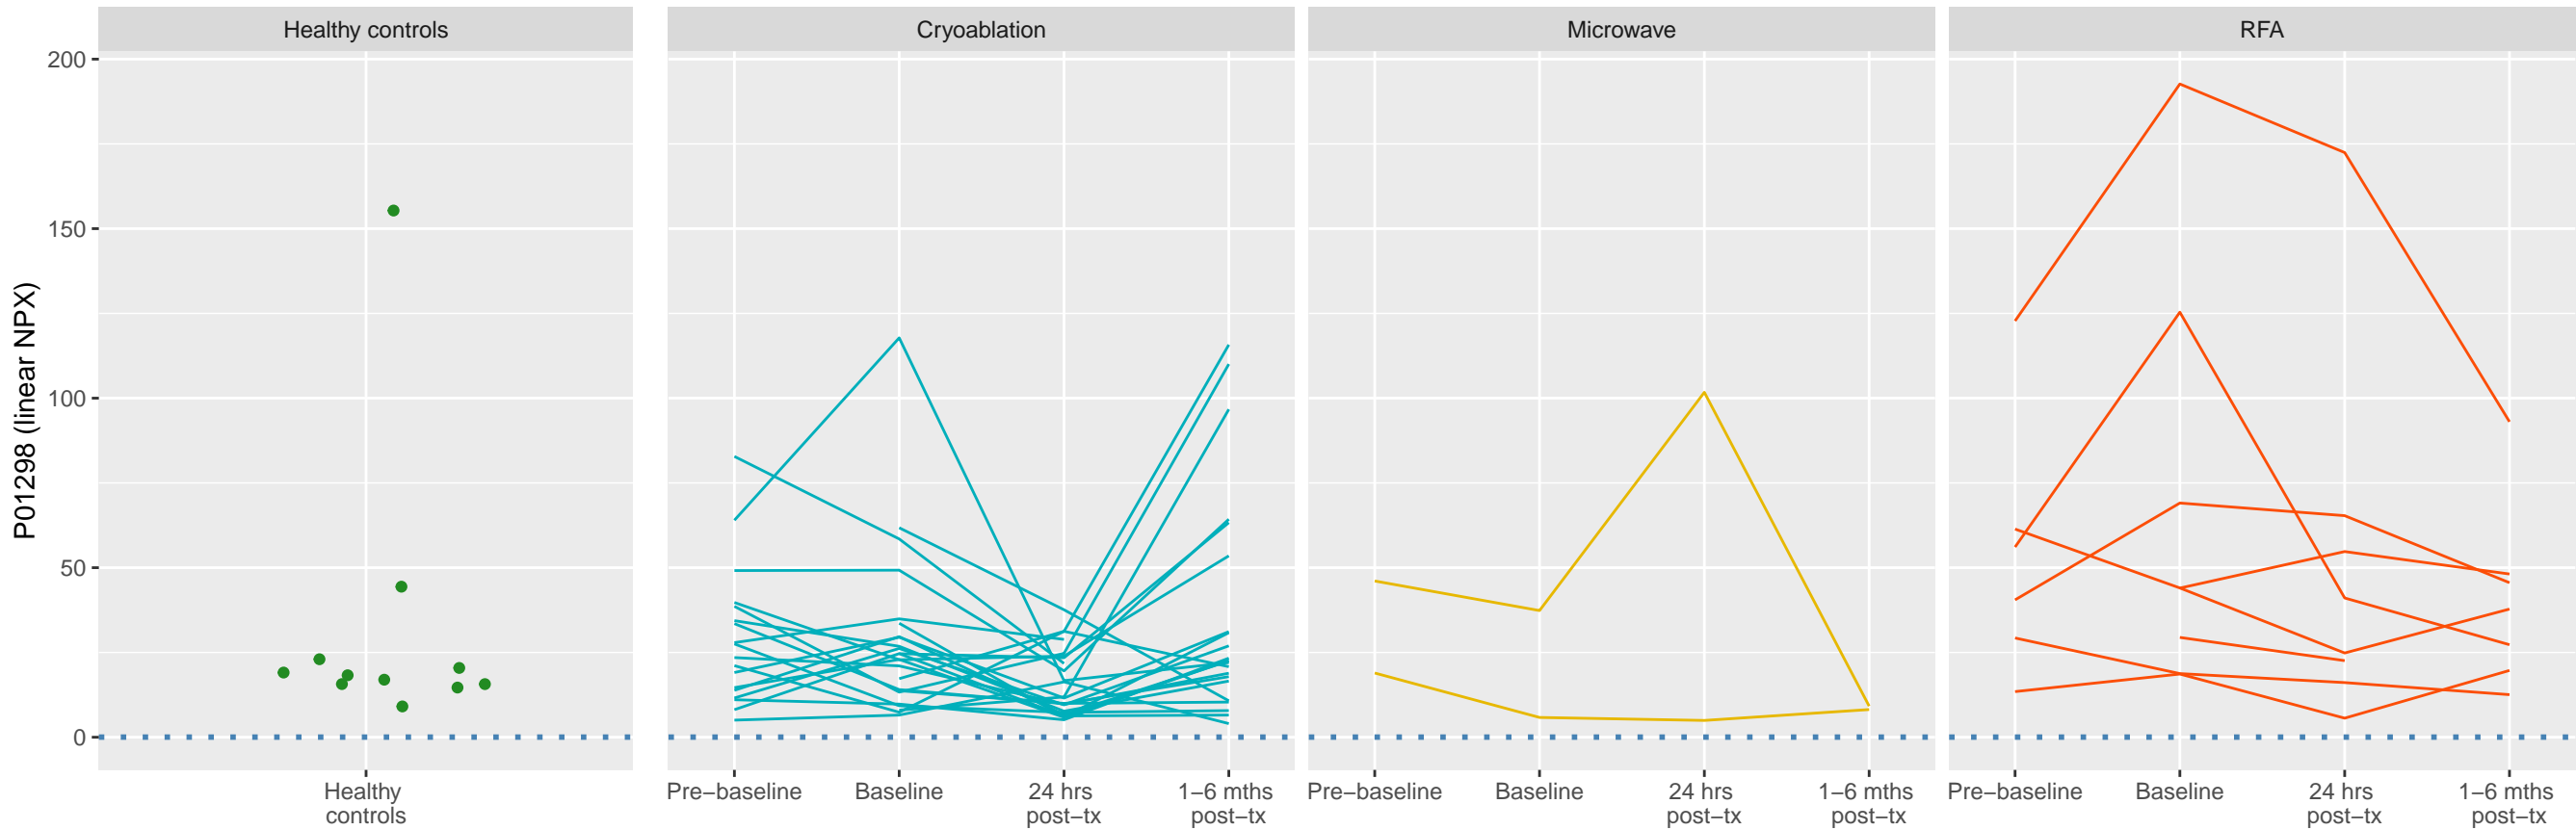

P31949 (linear NPX)

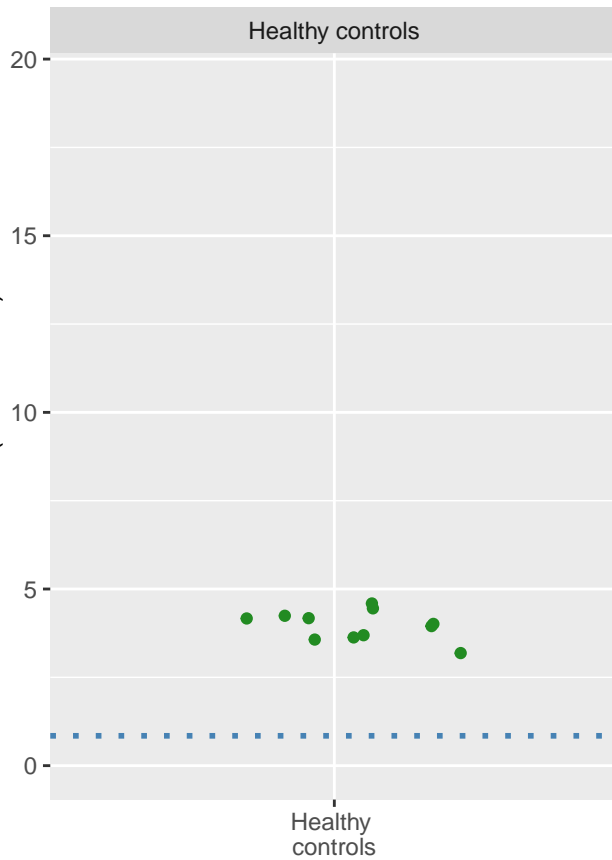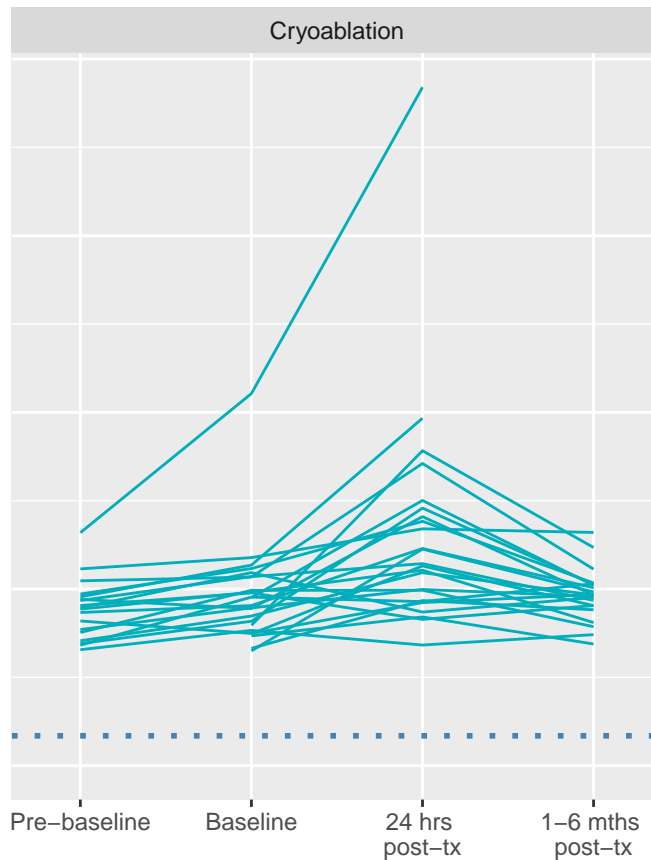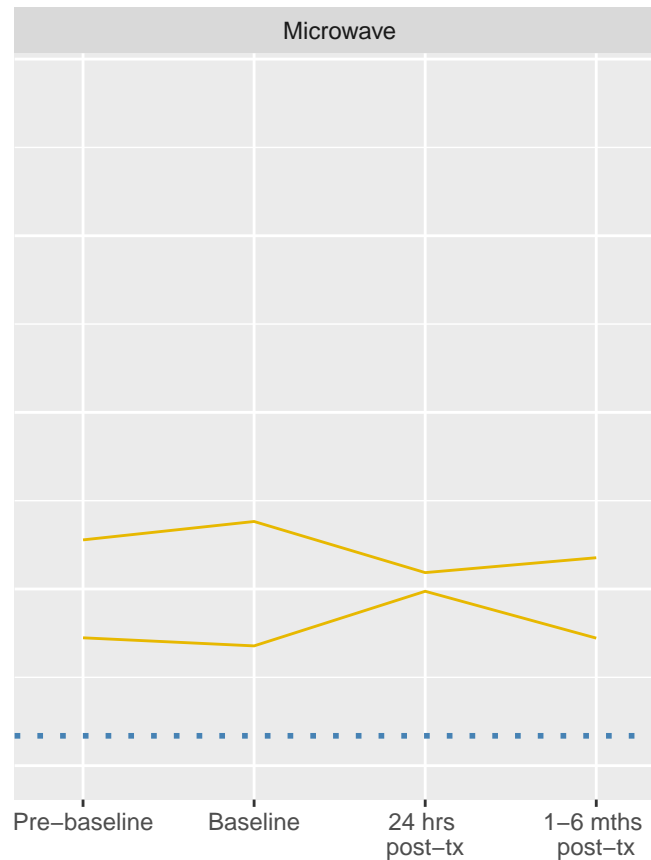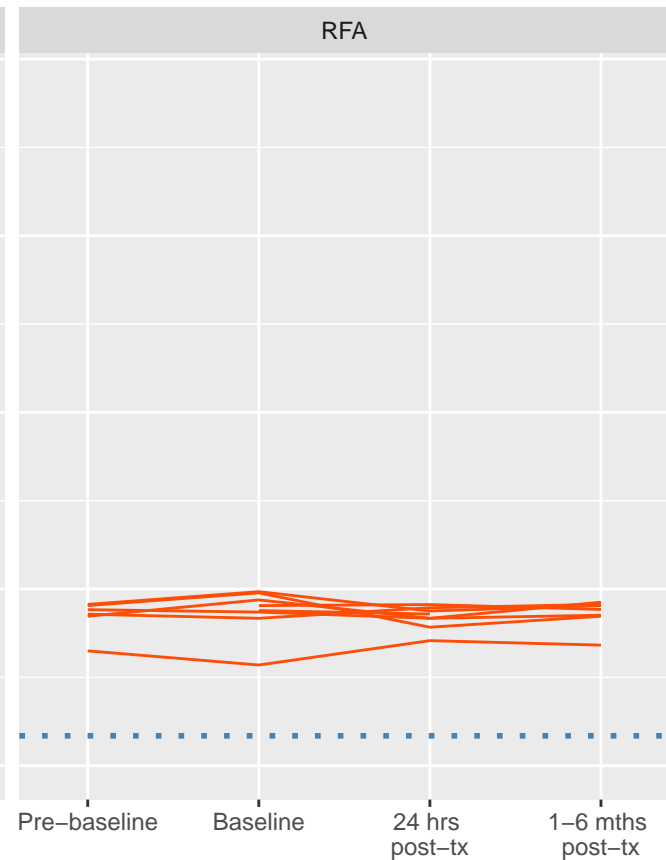

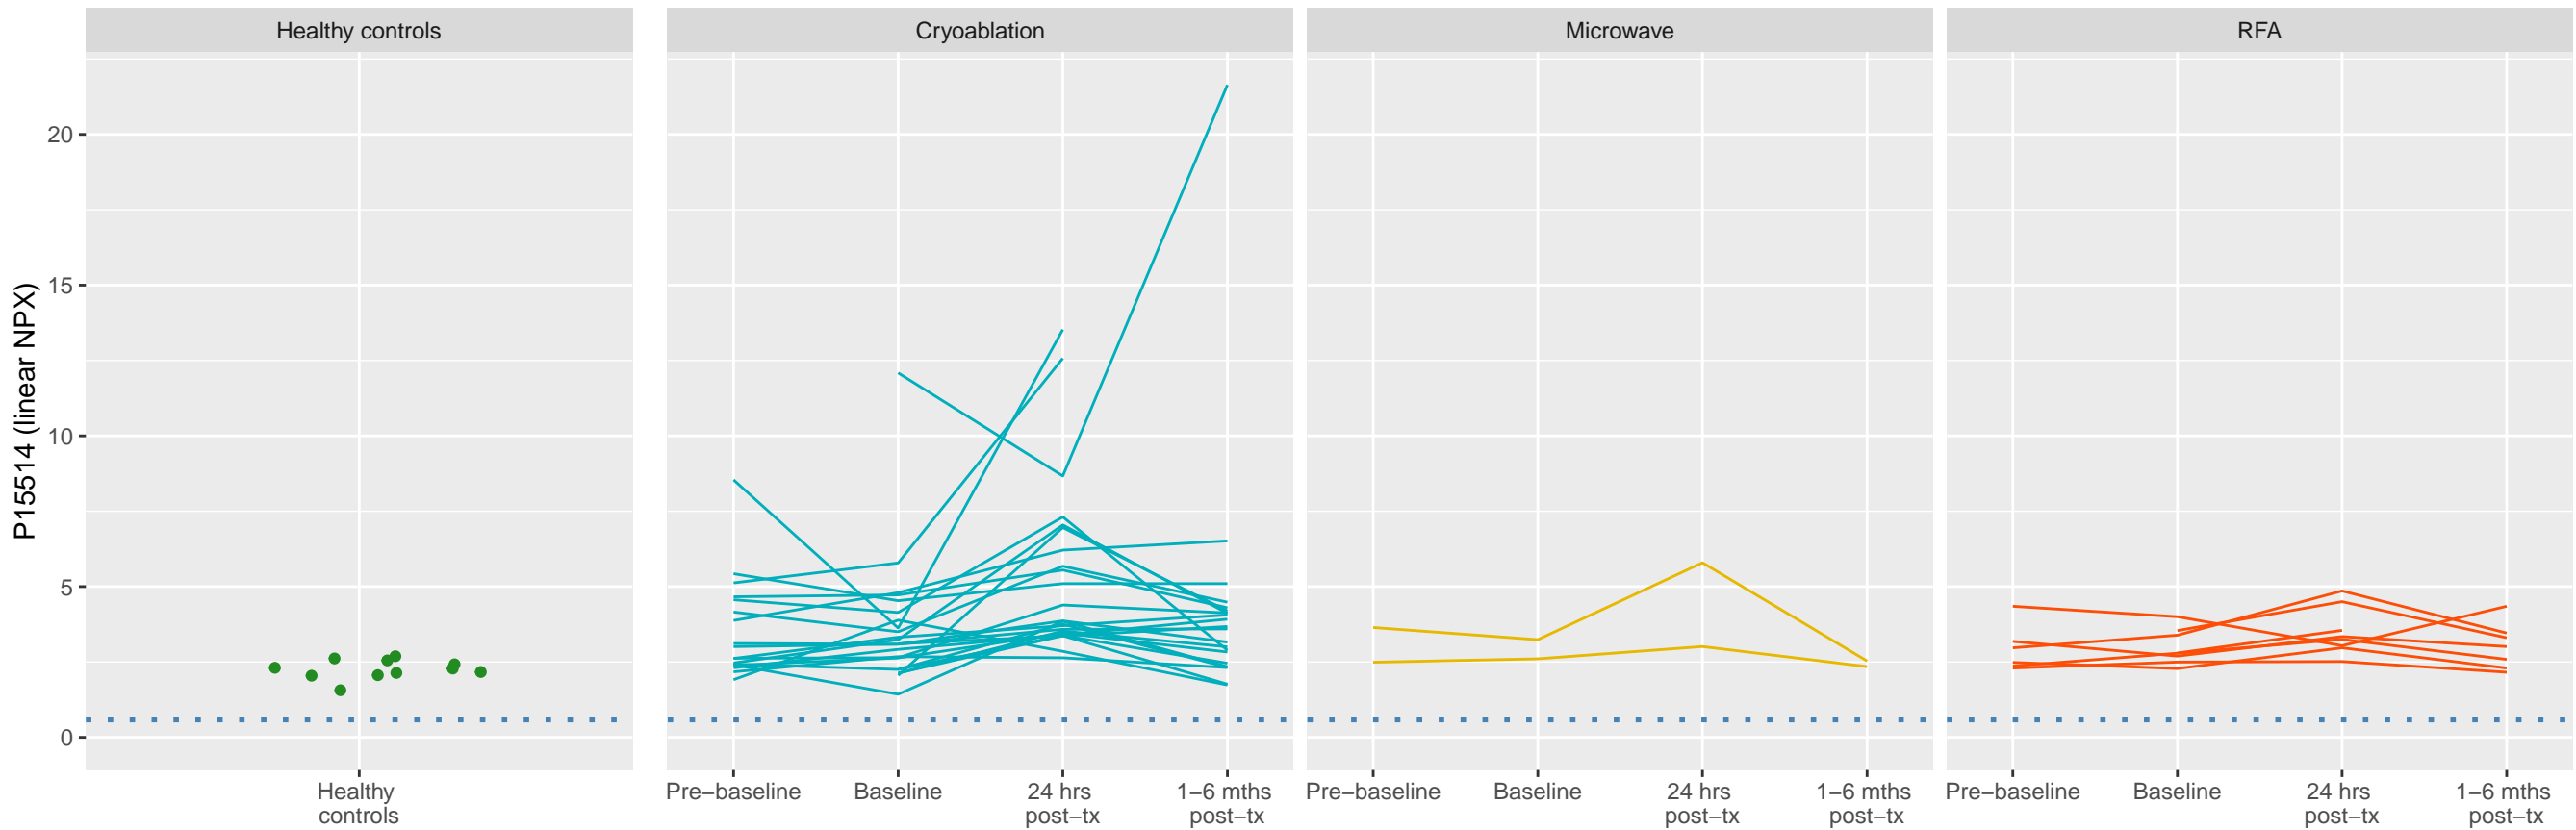

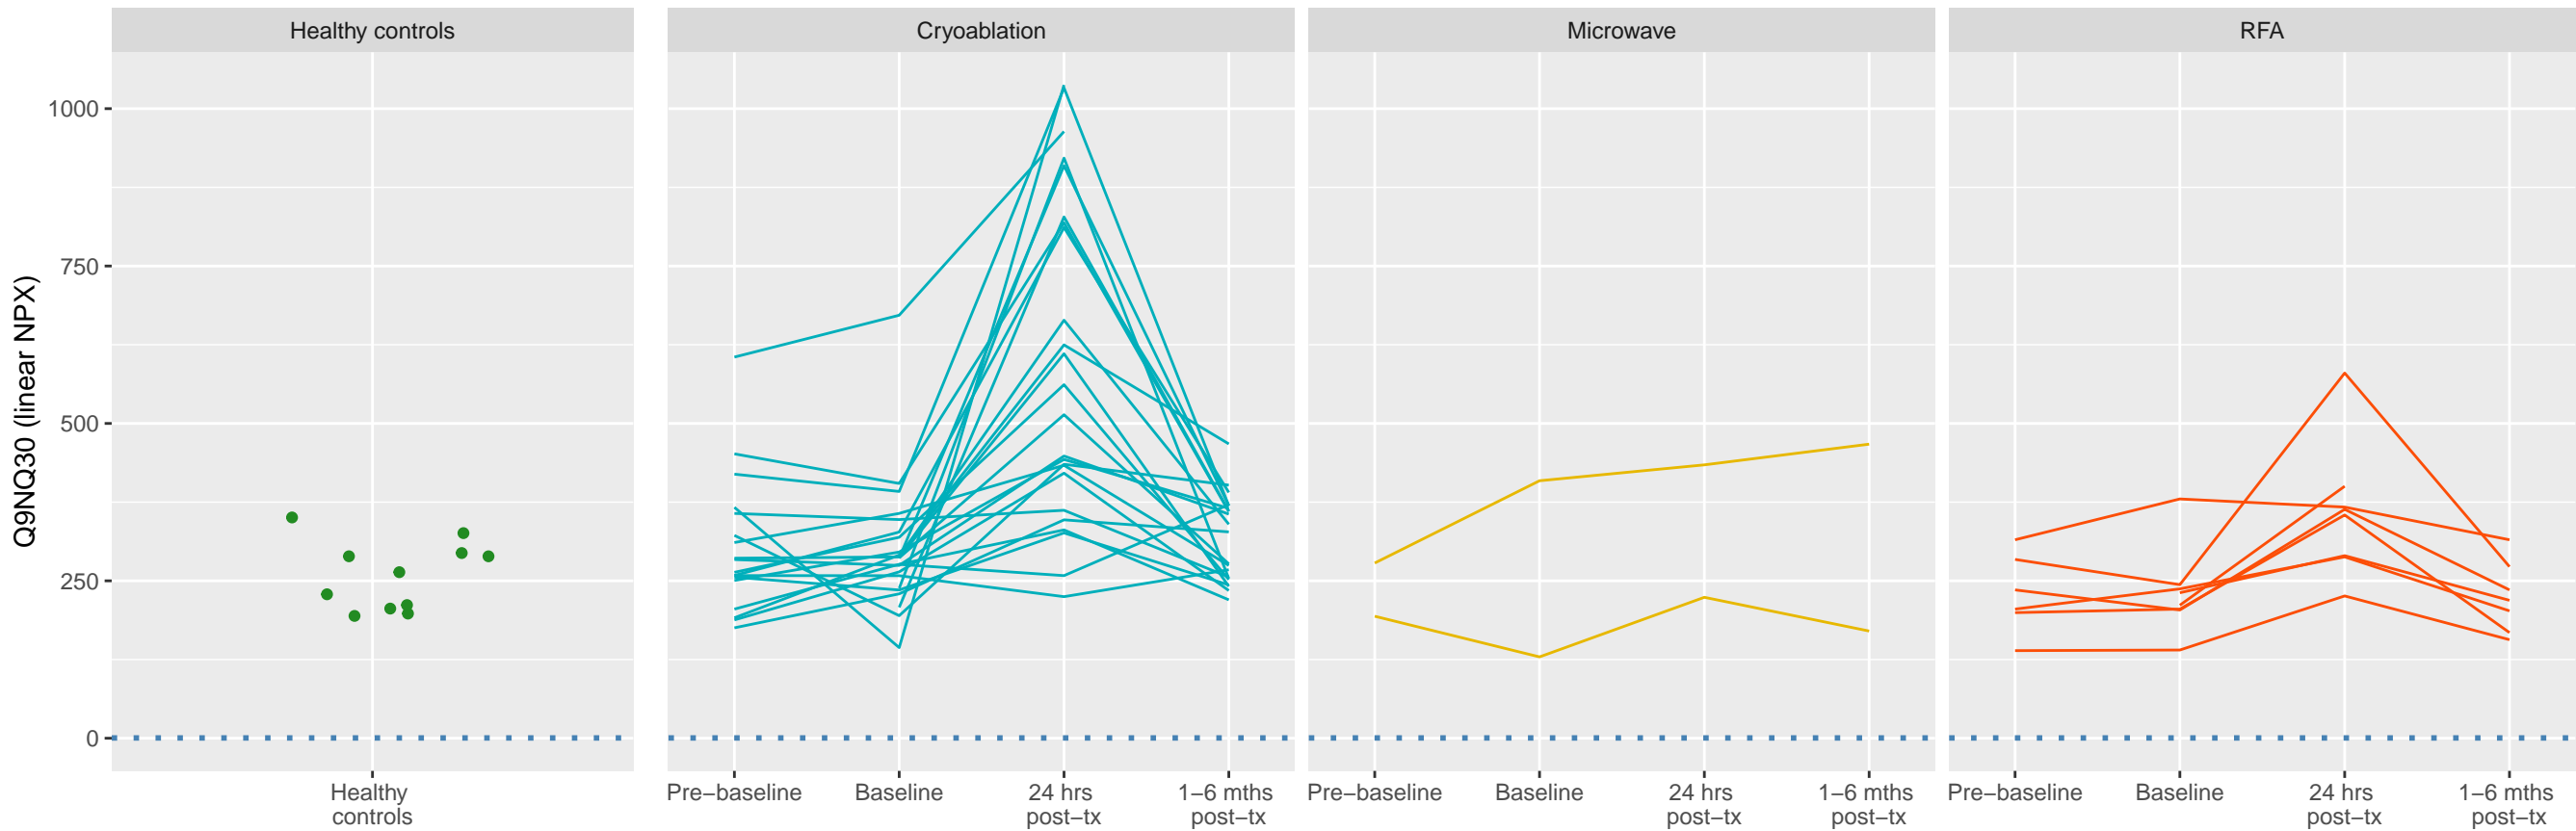

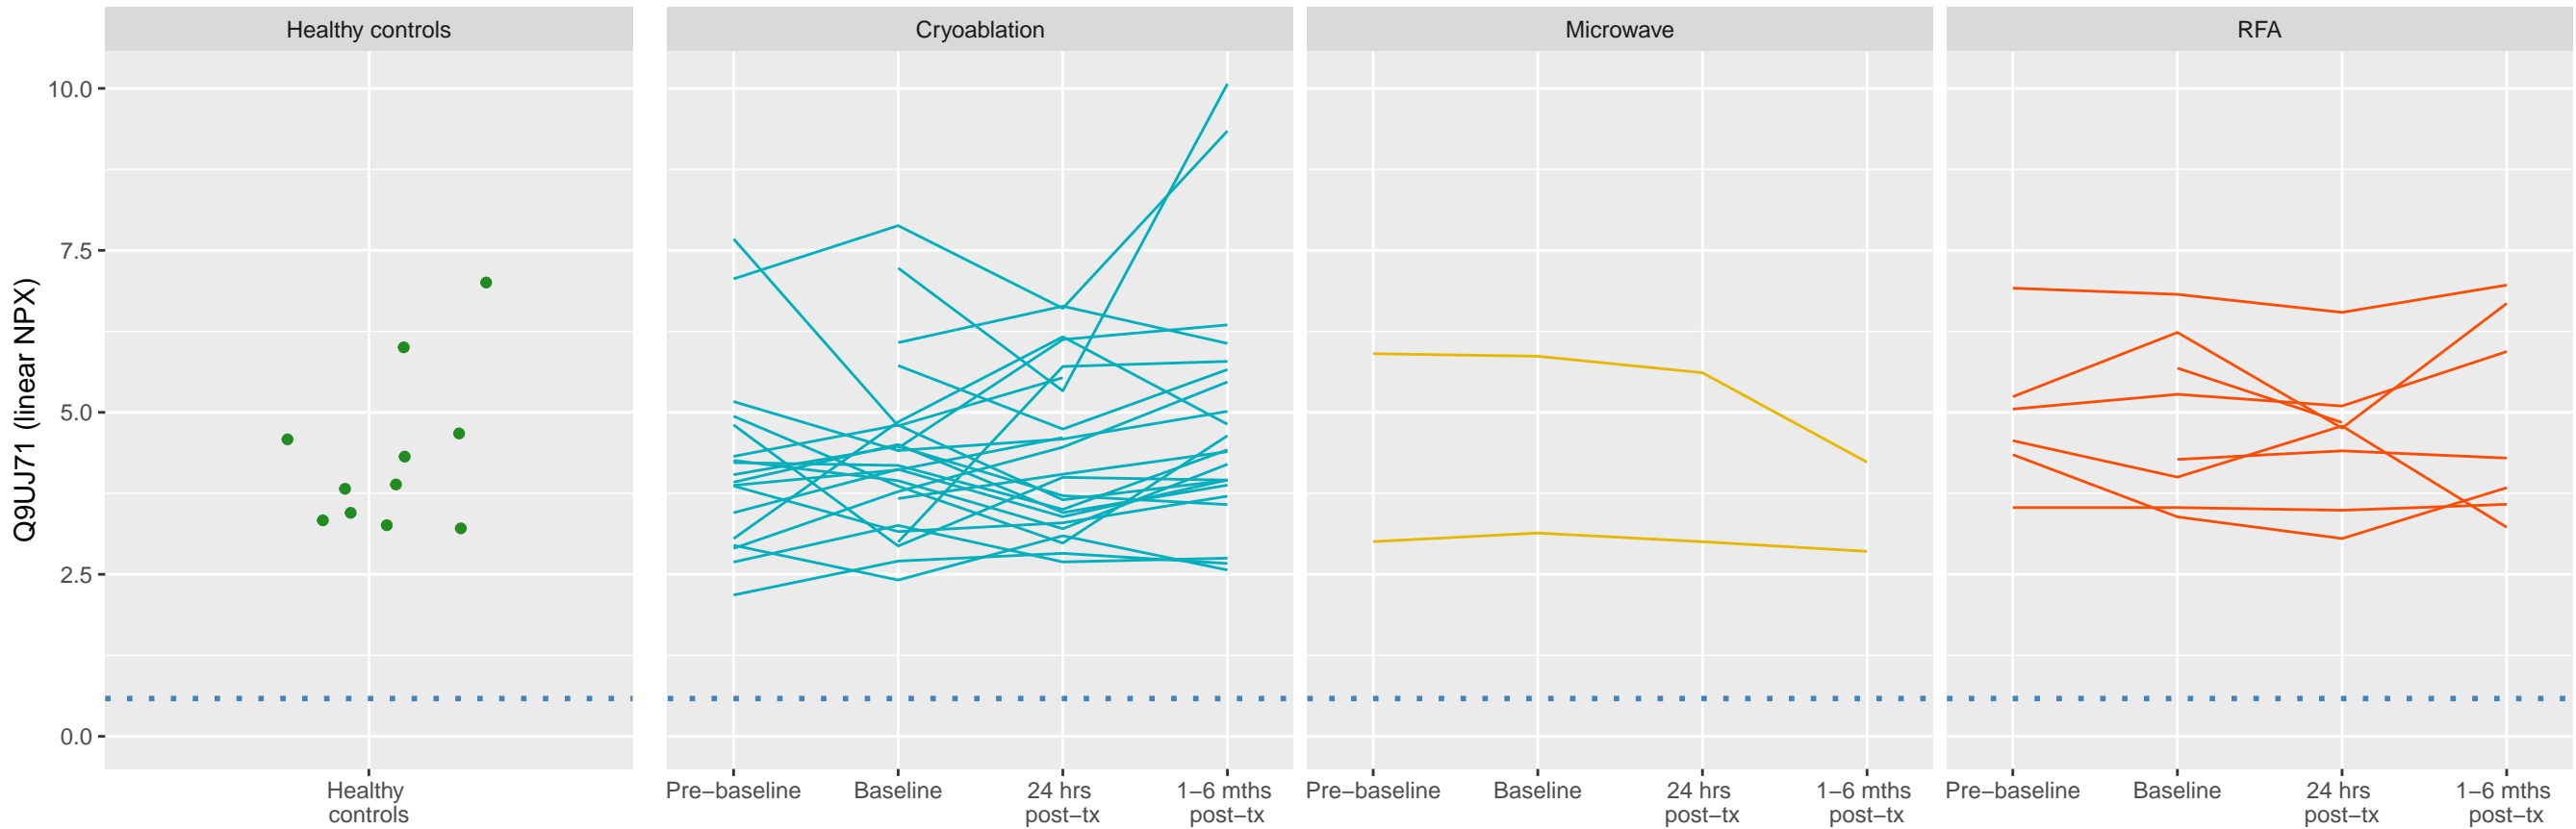

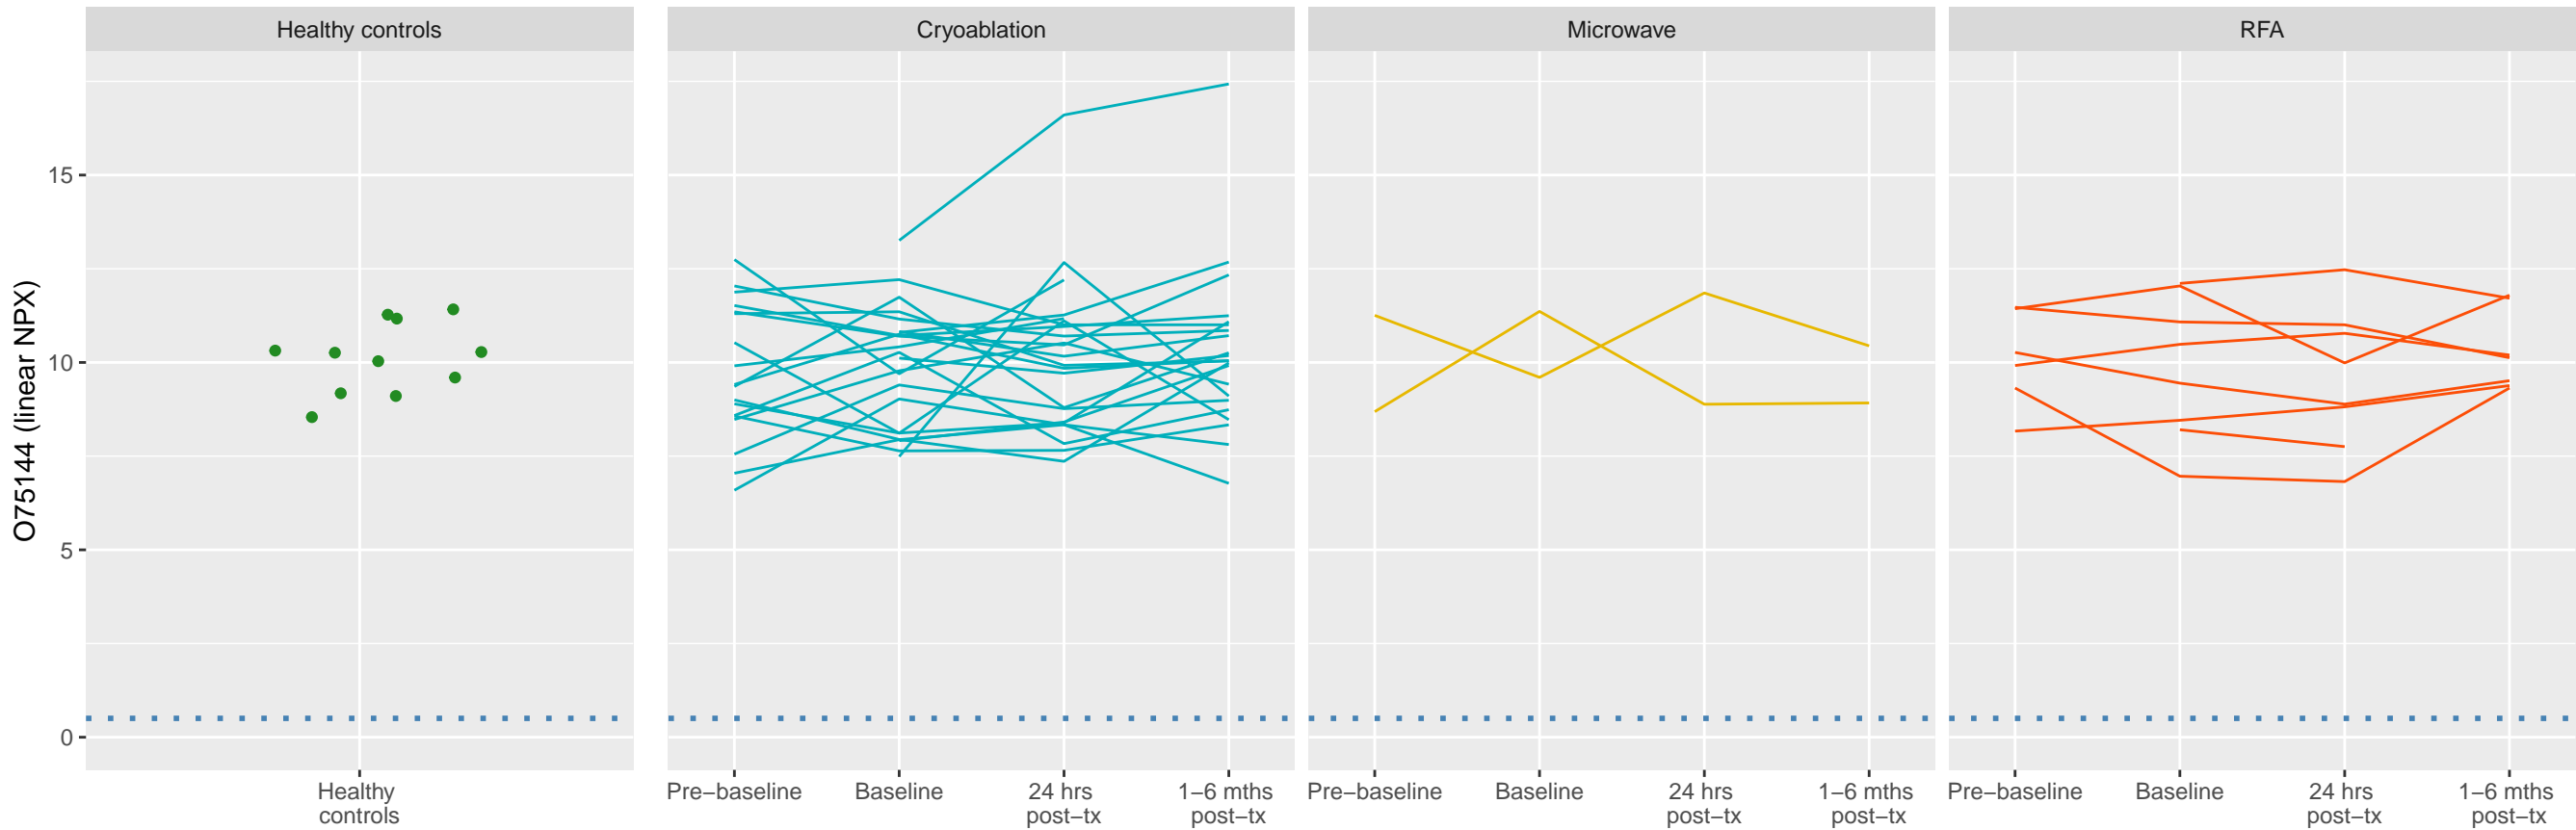

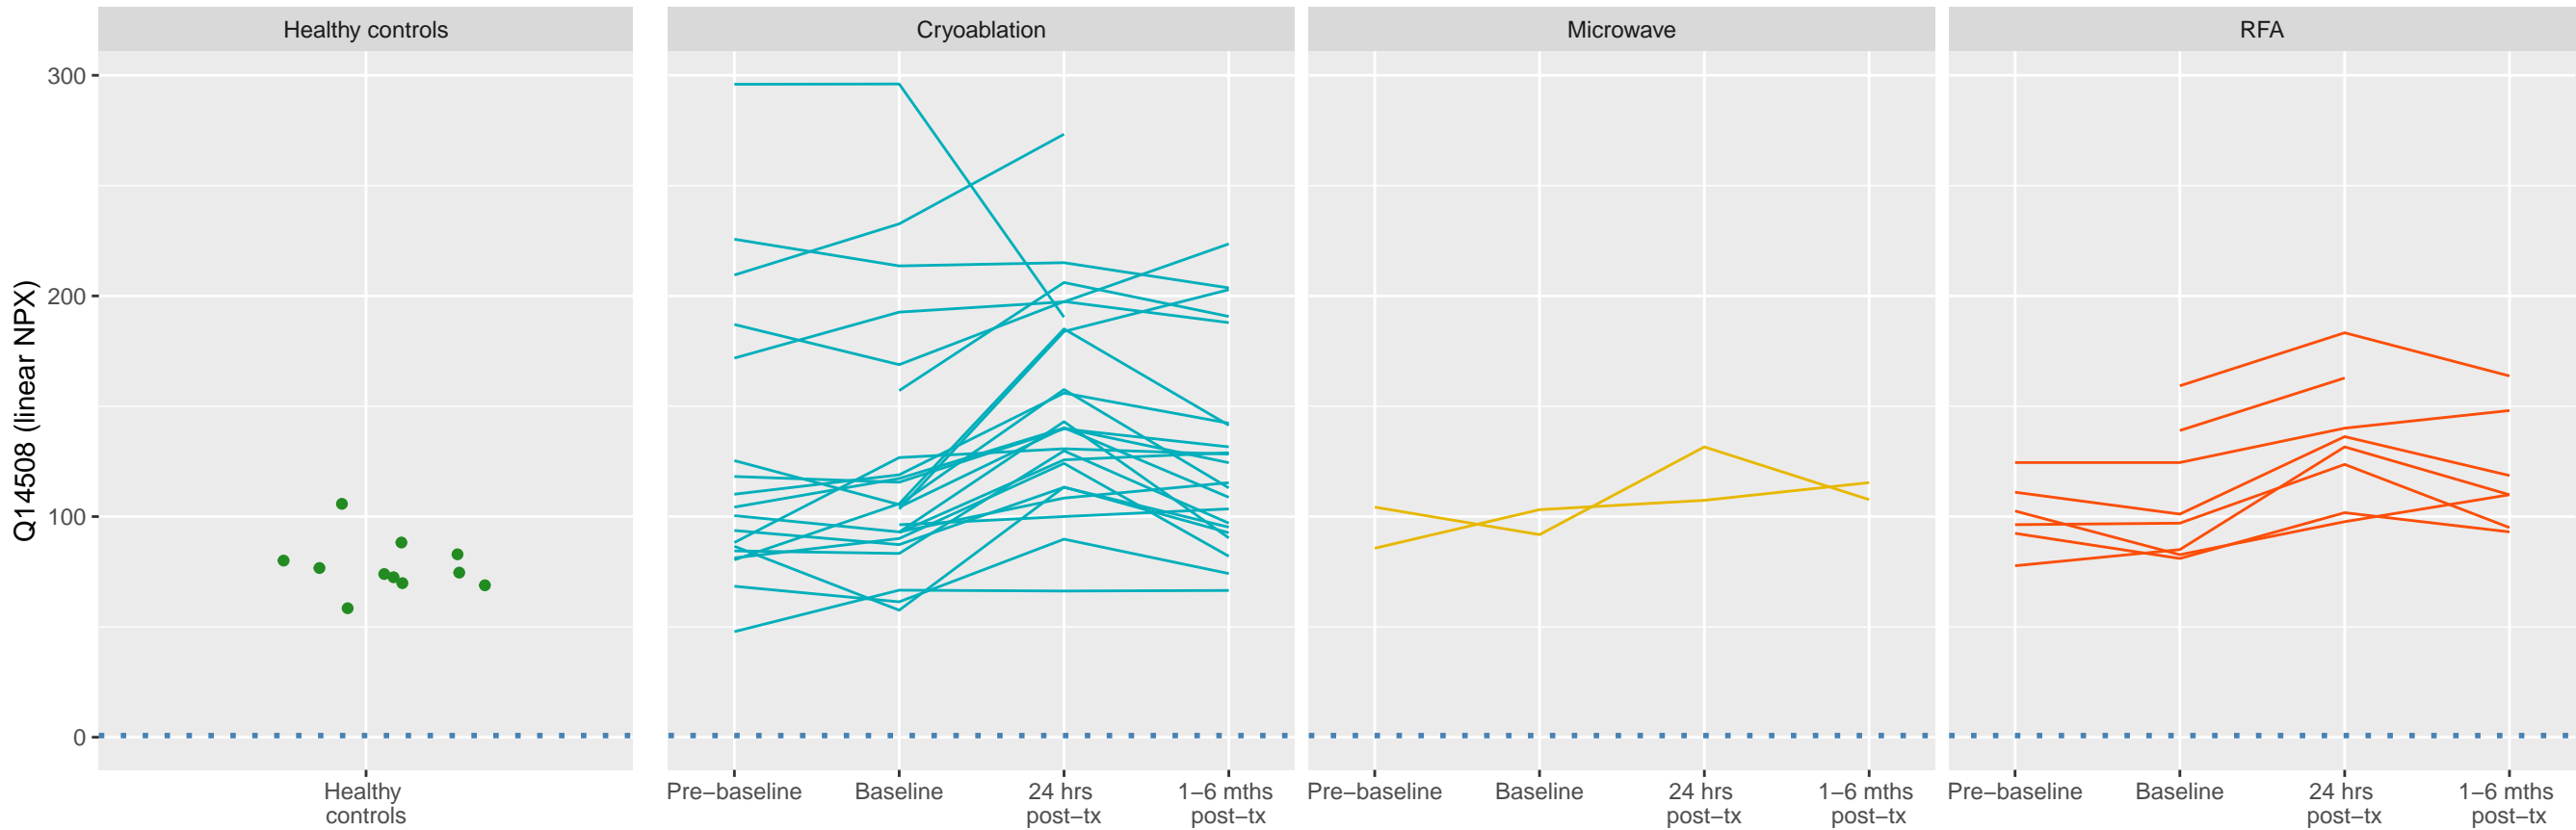

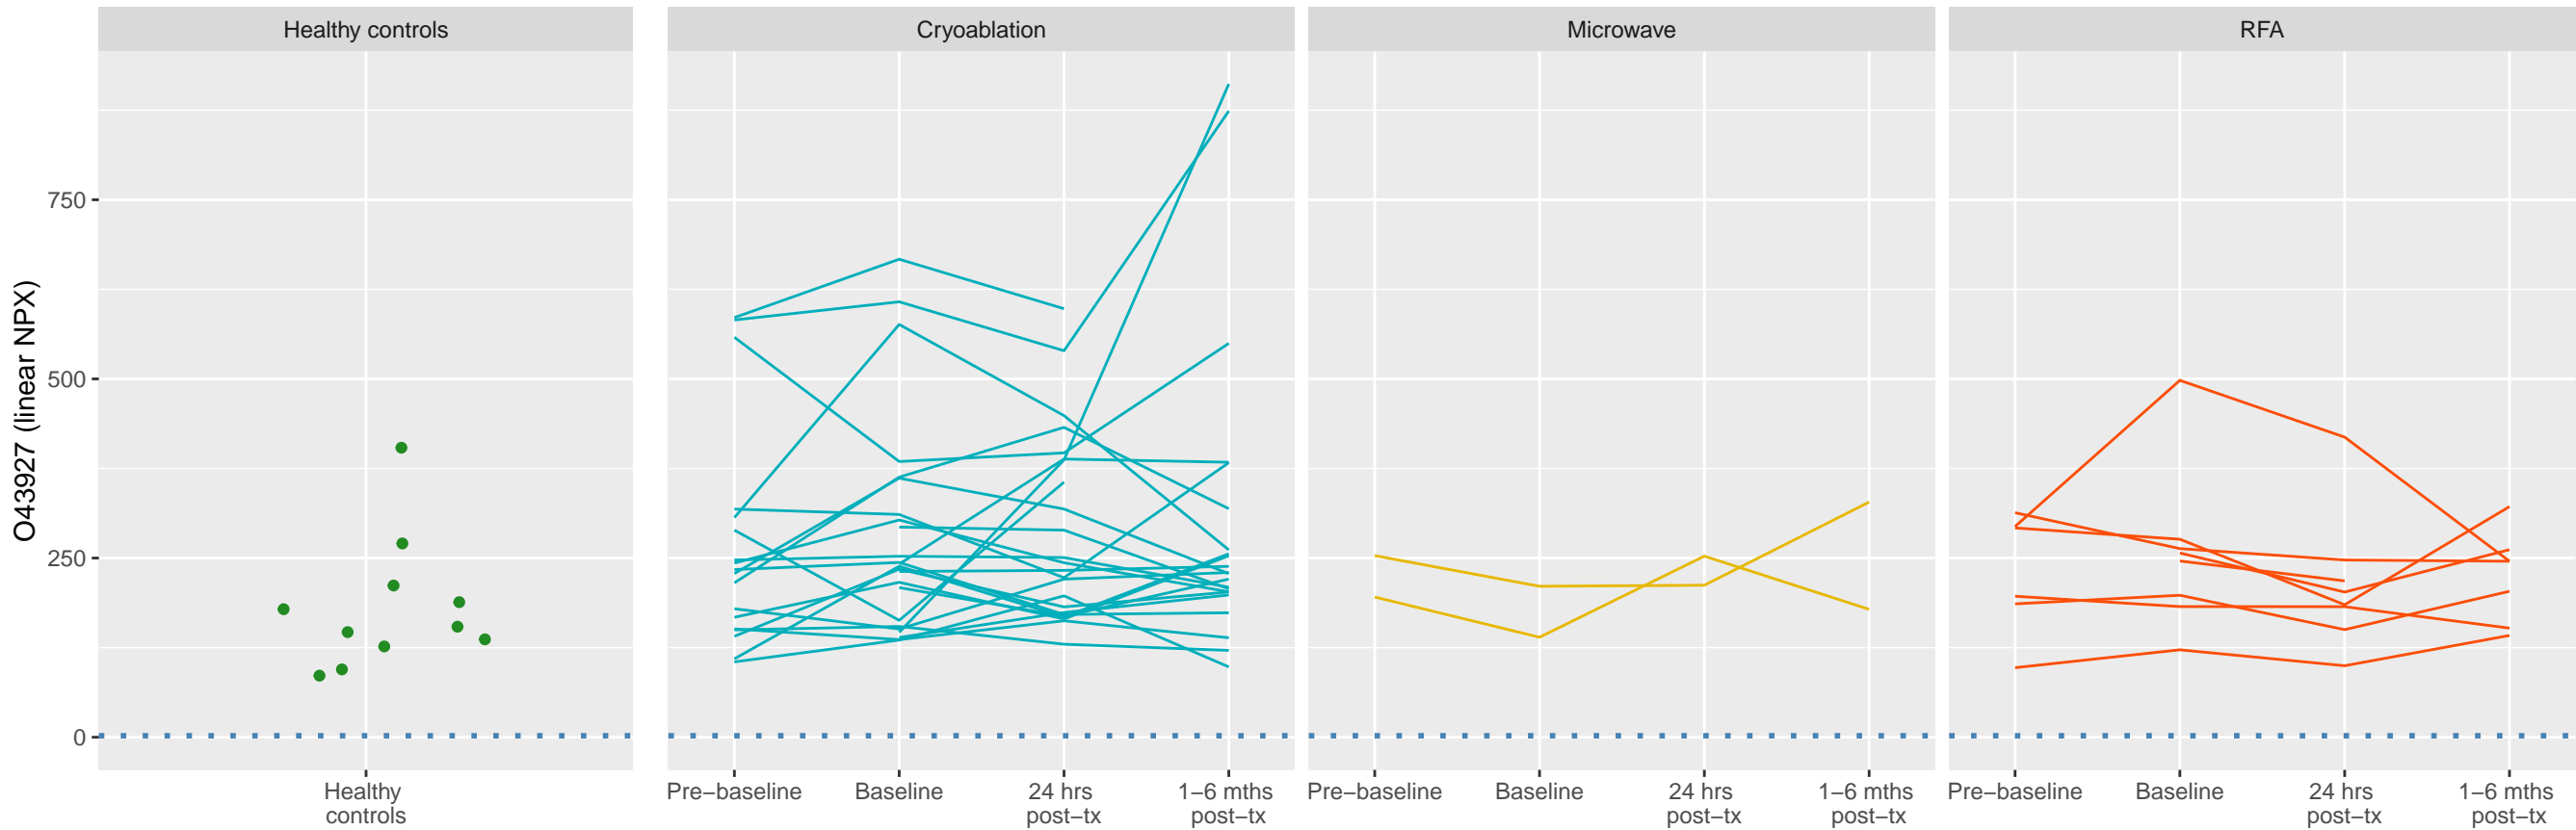



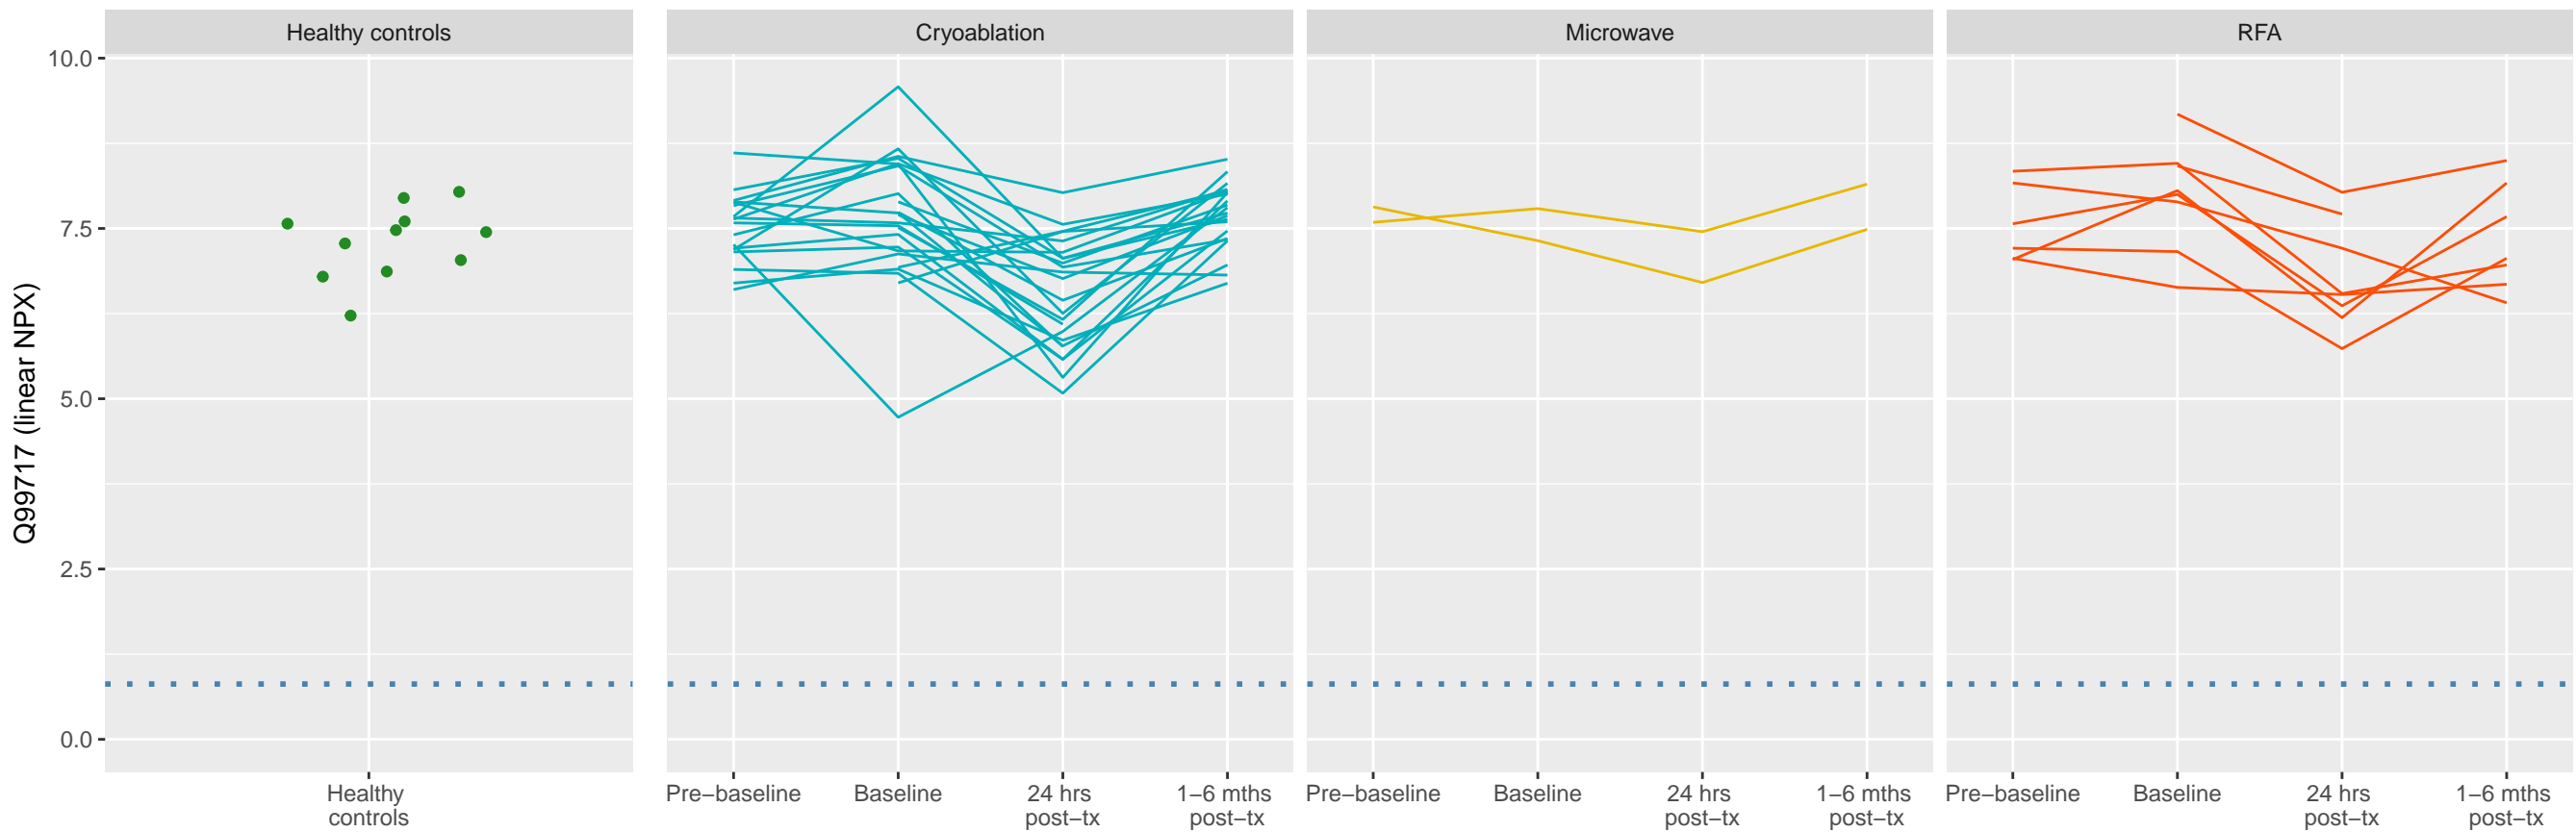

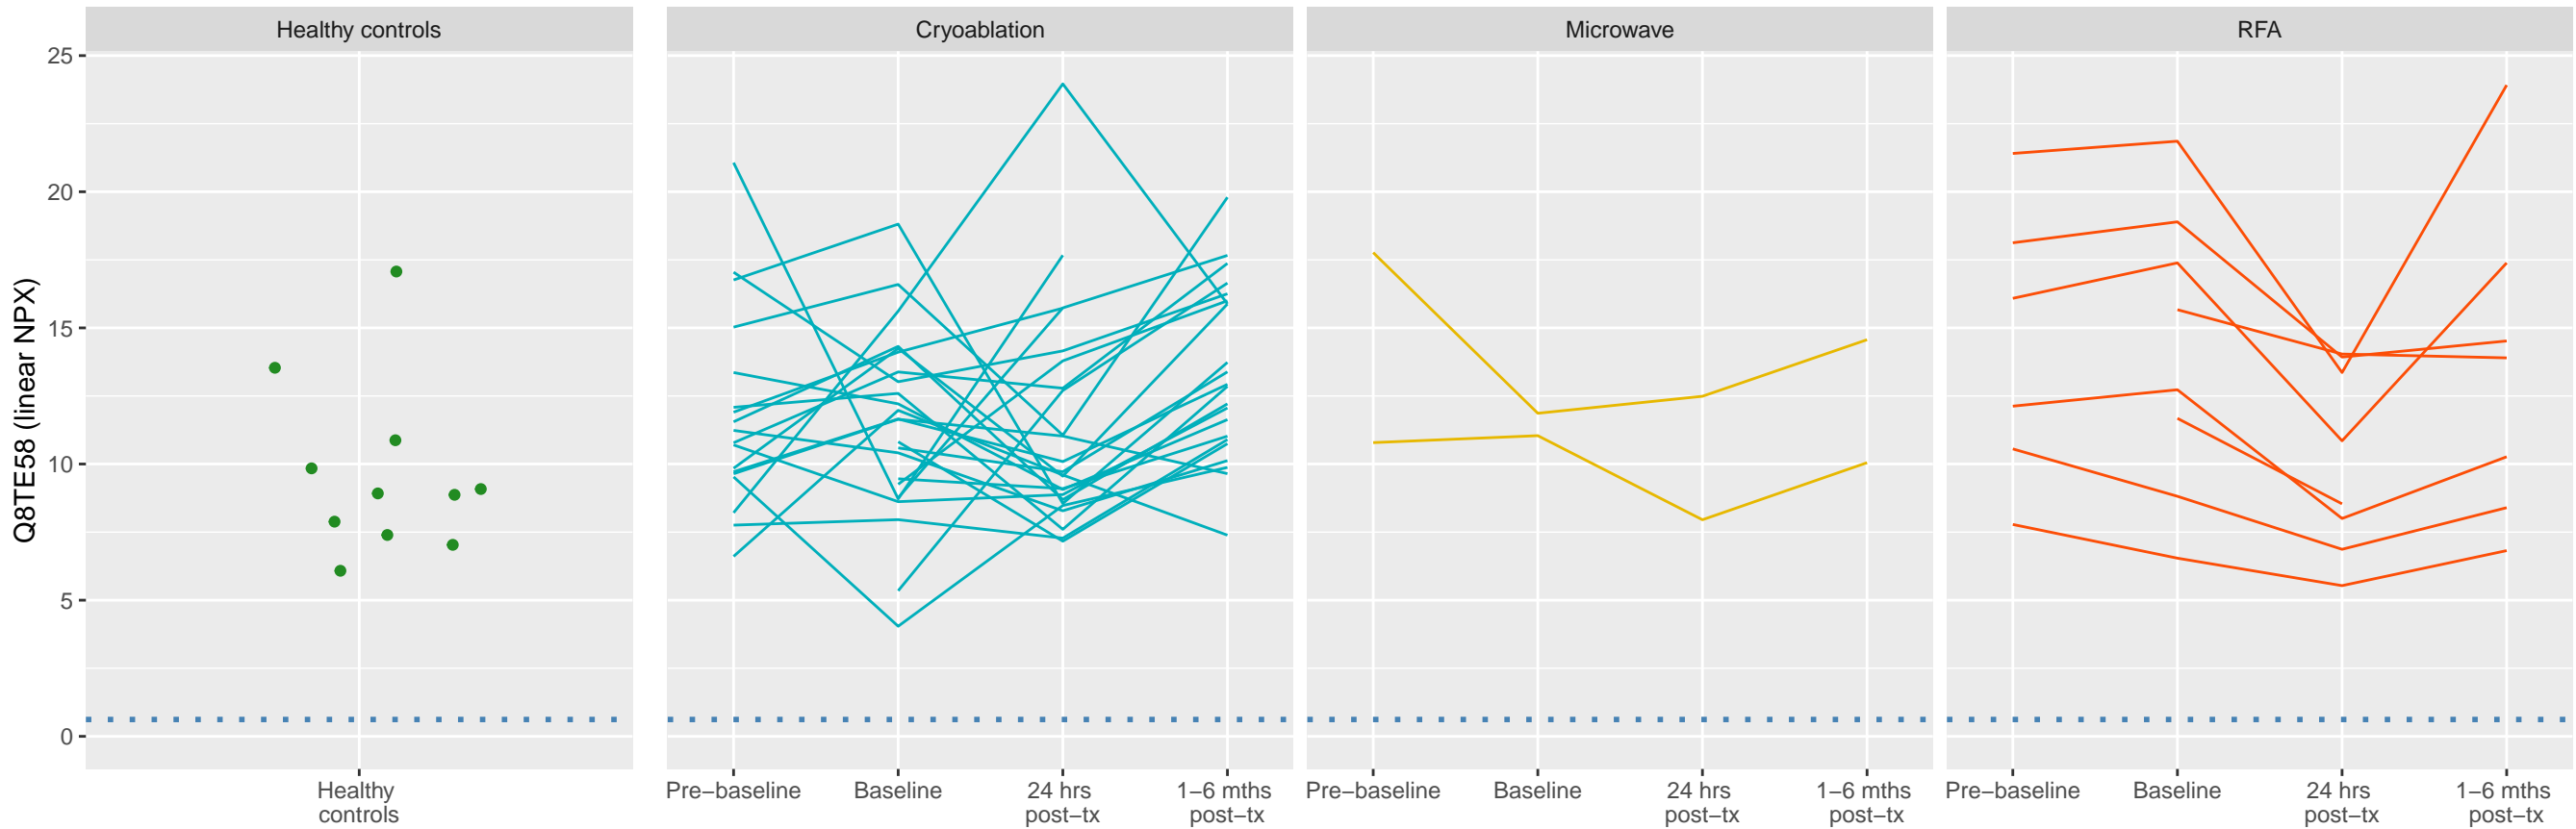

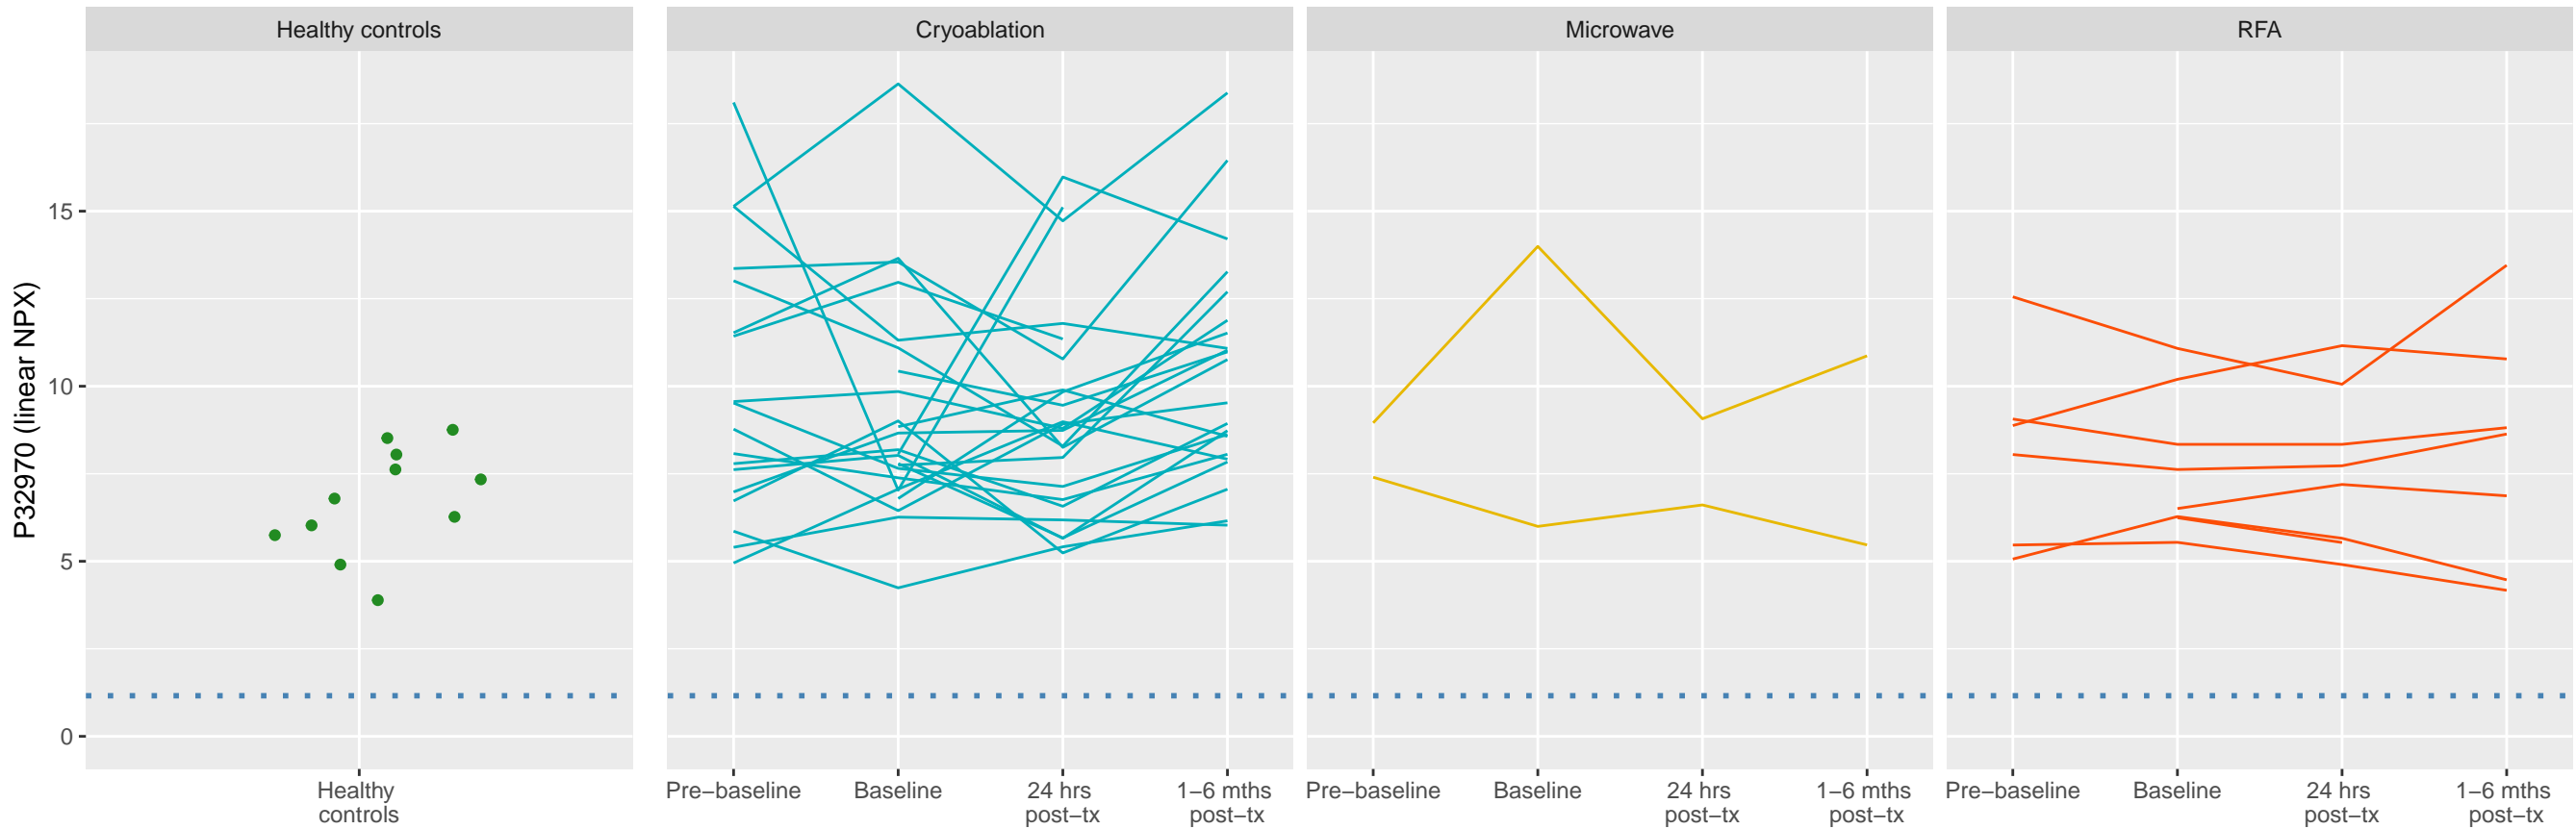

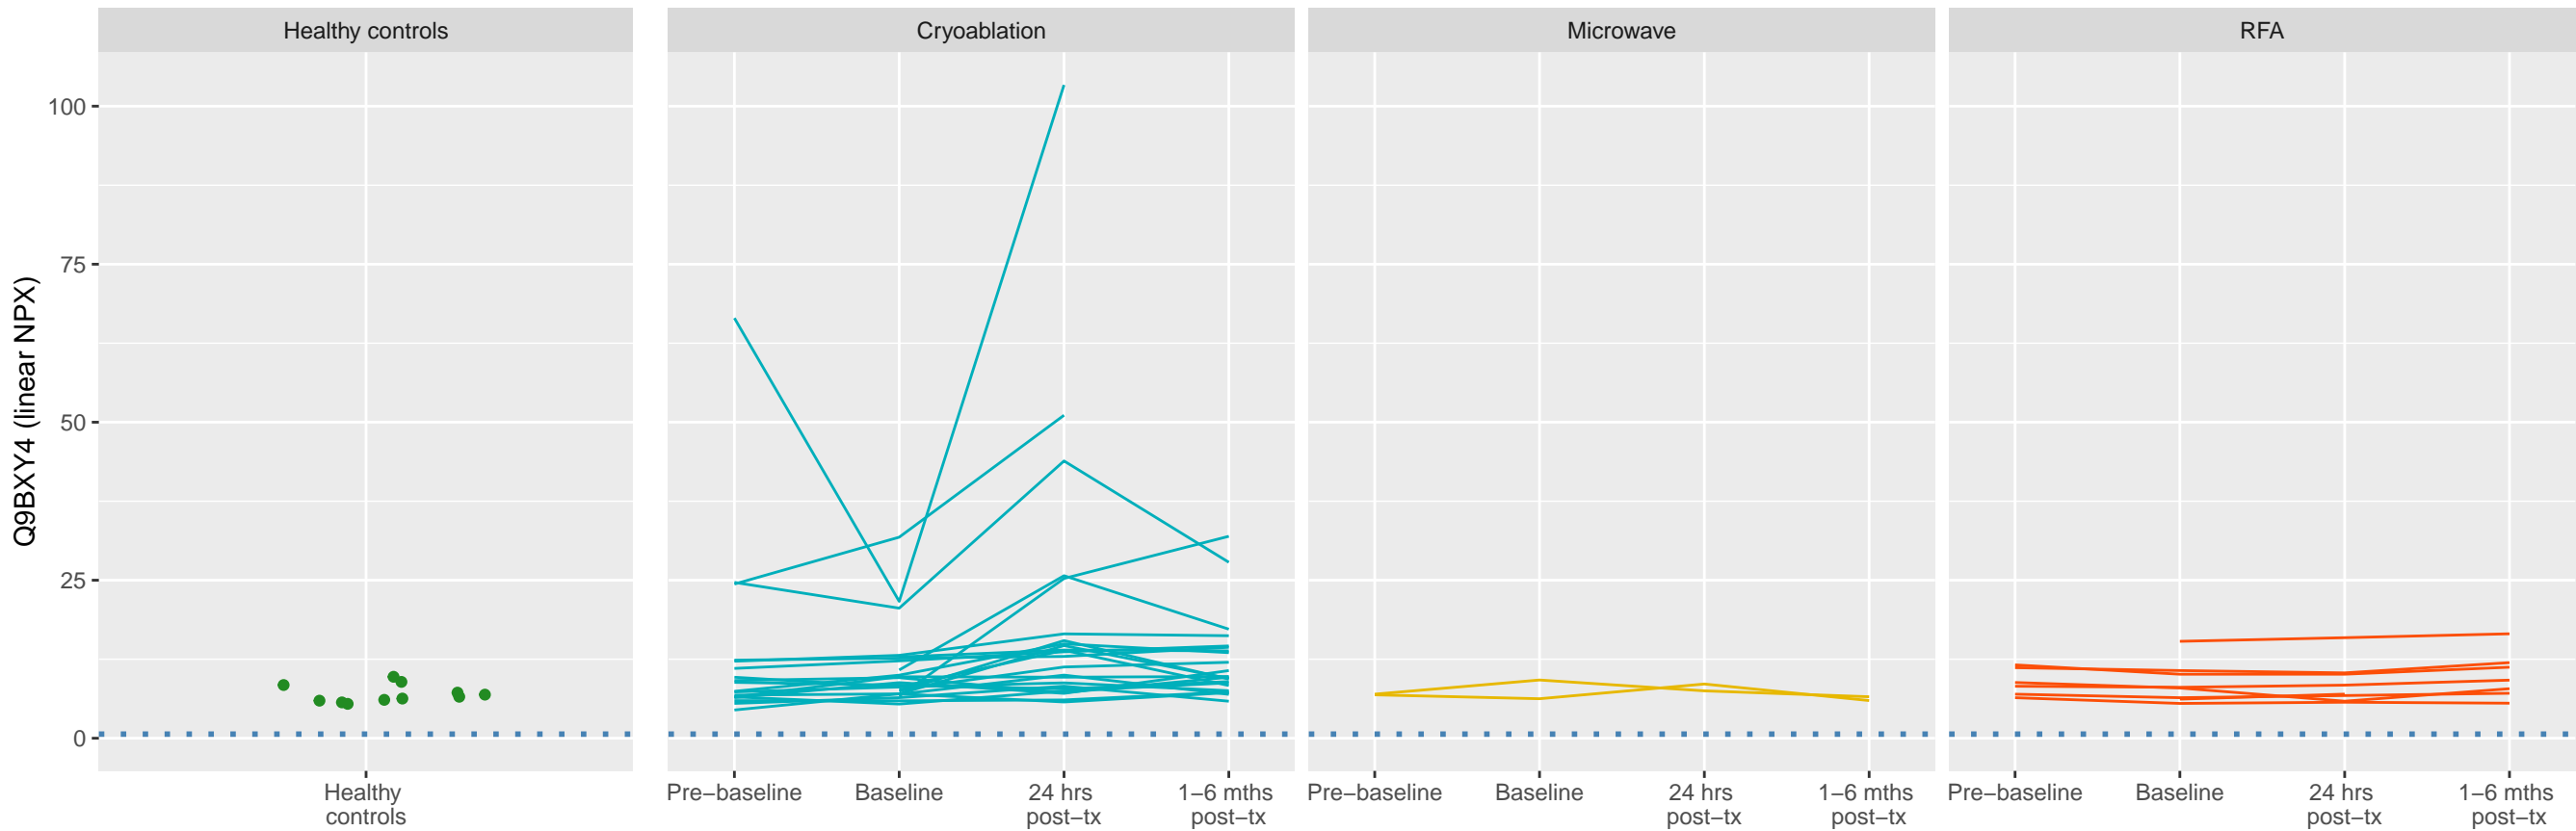

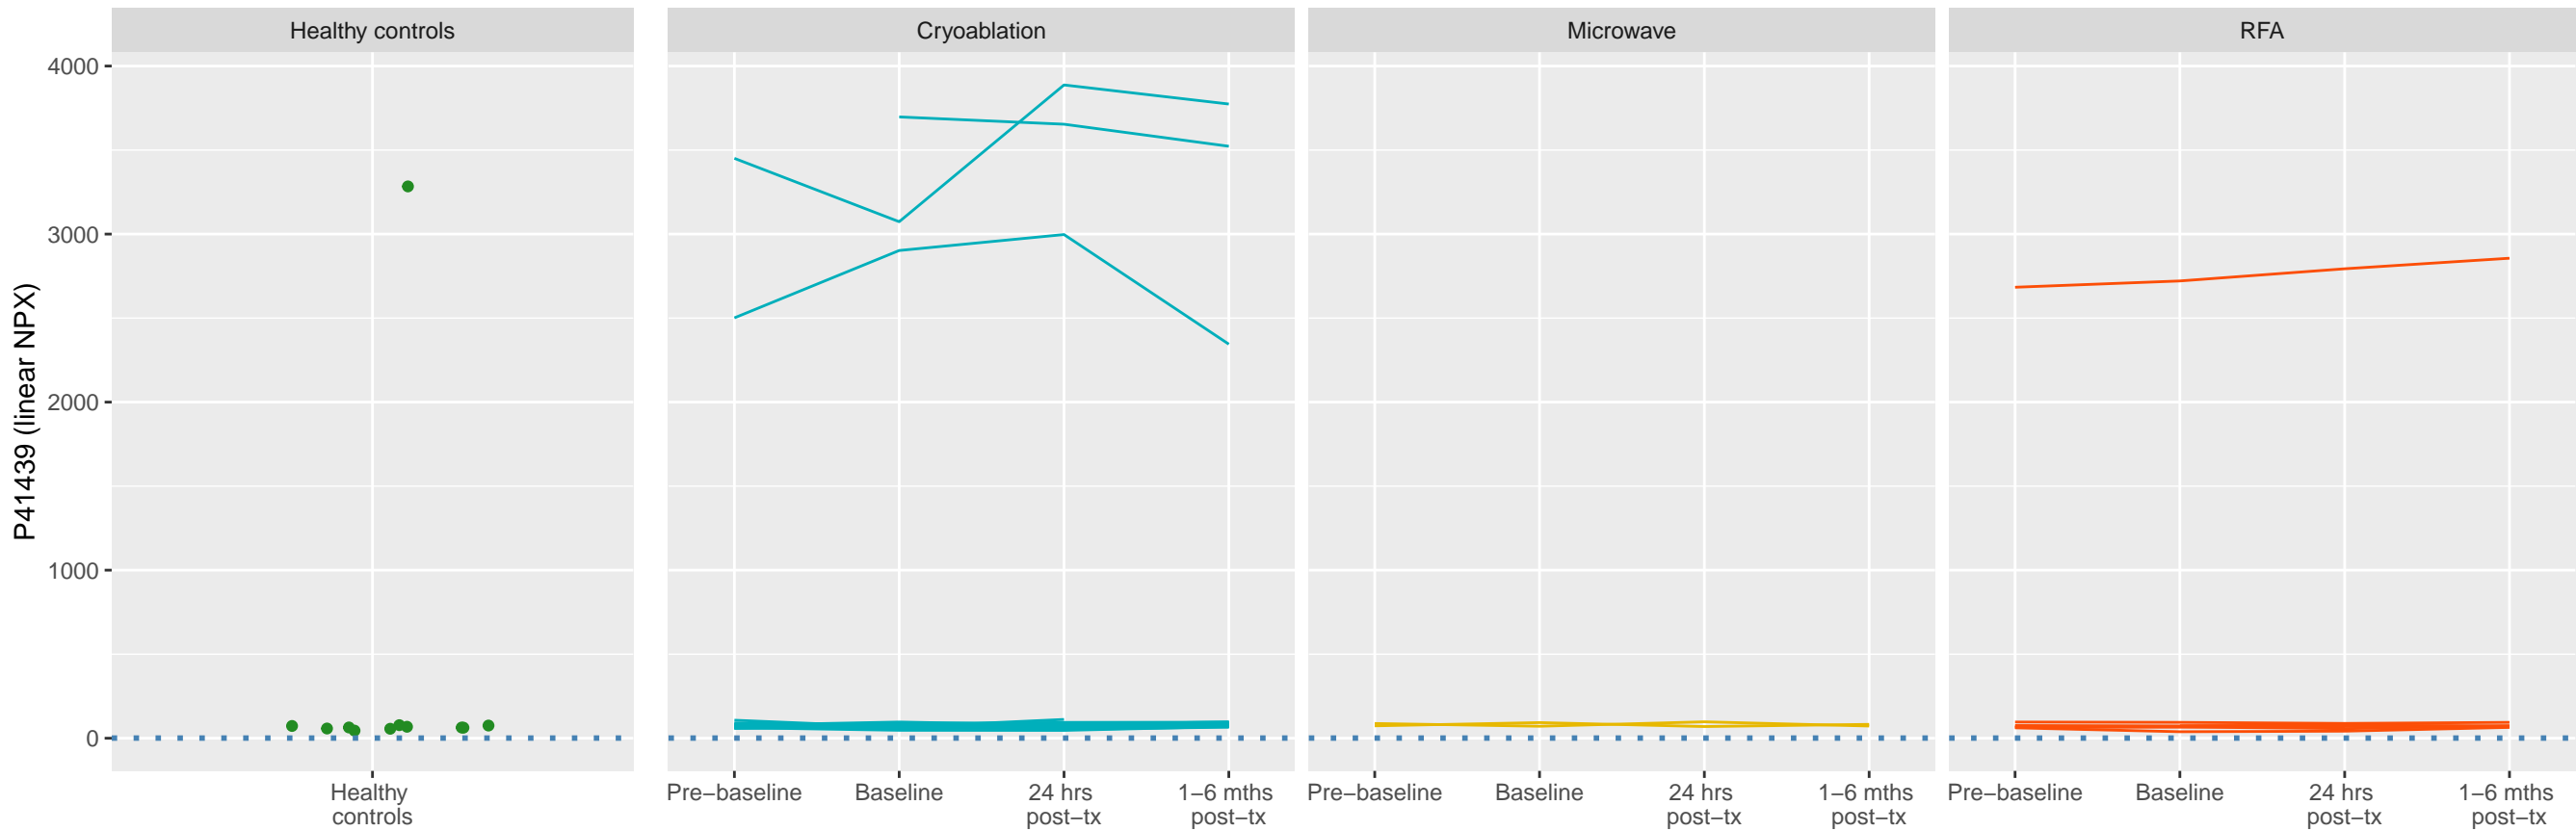

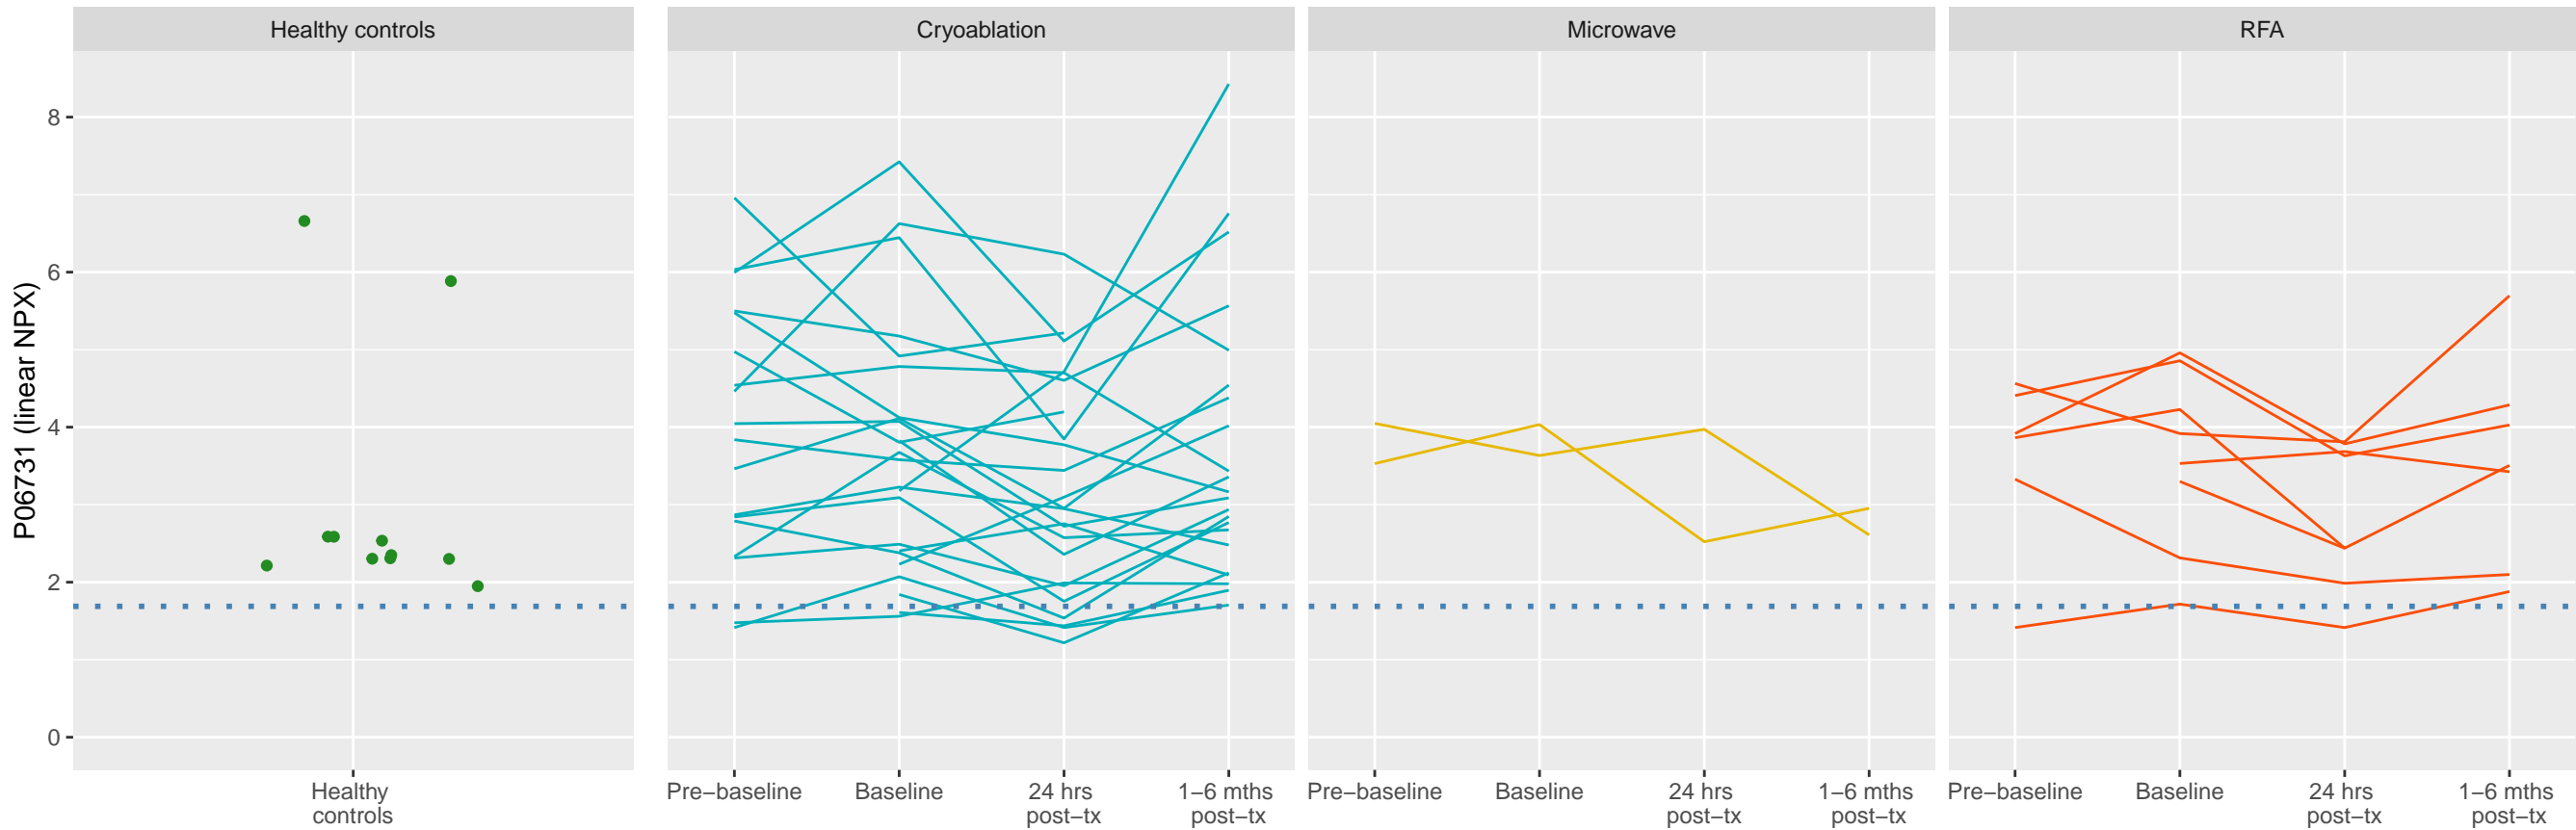

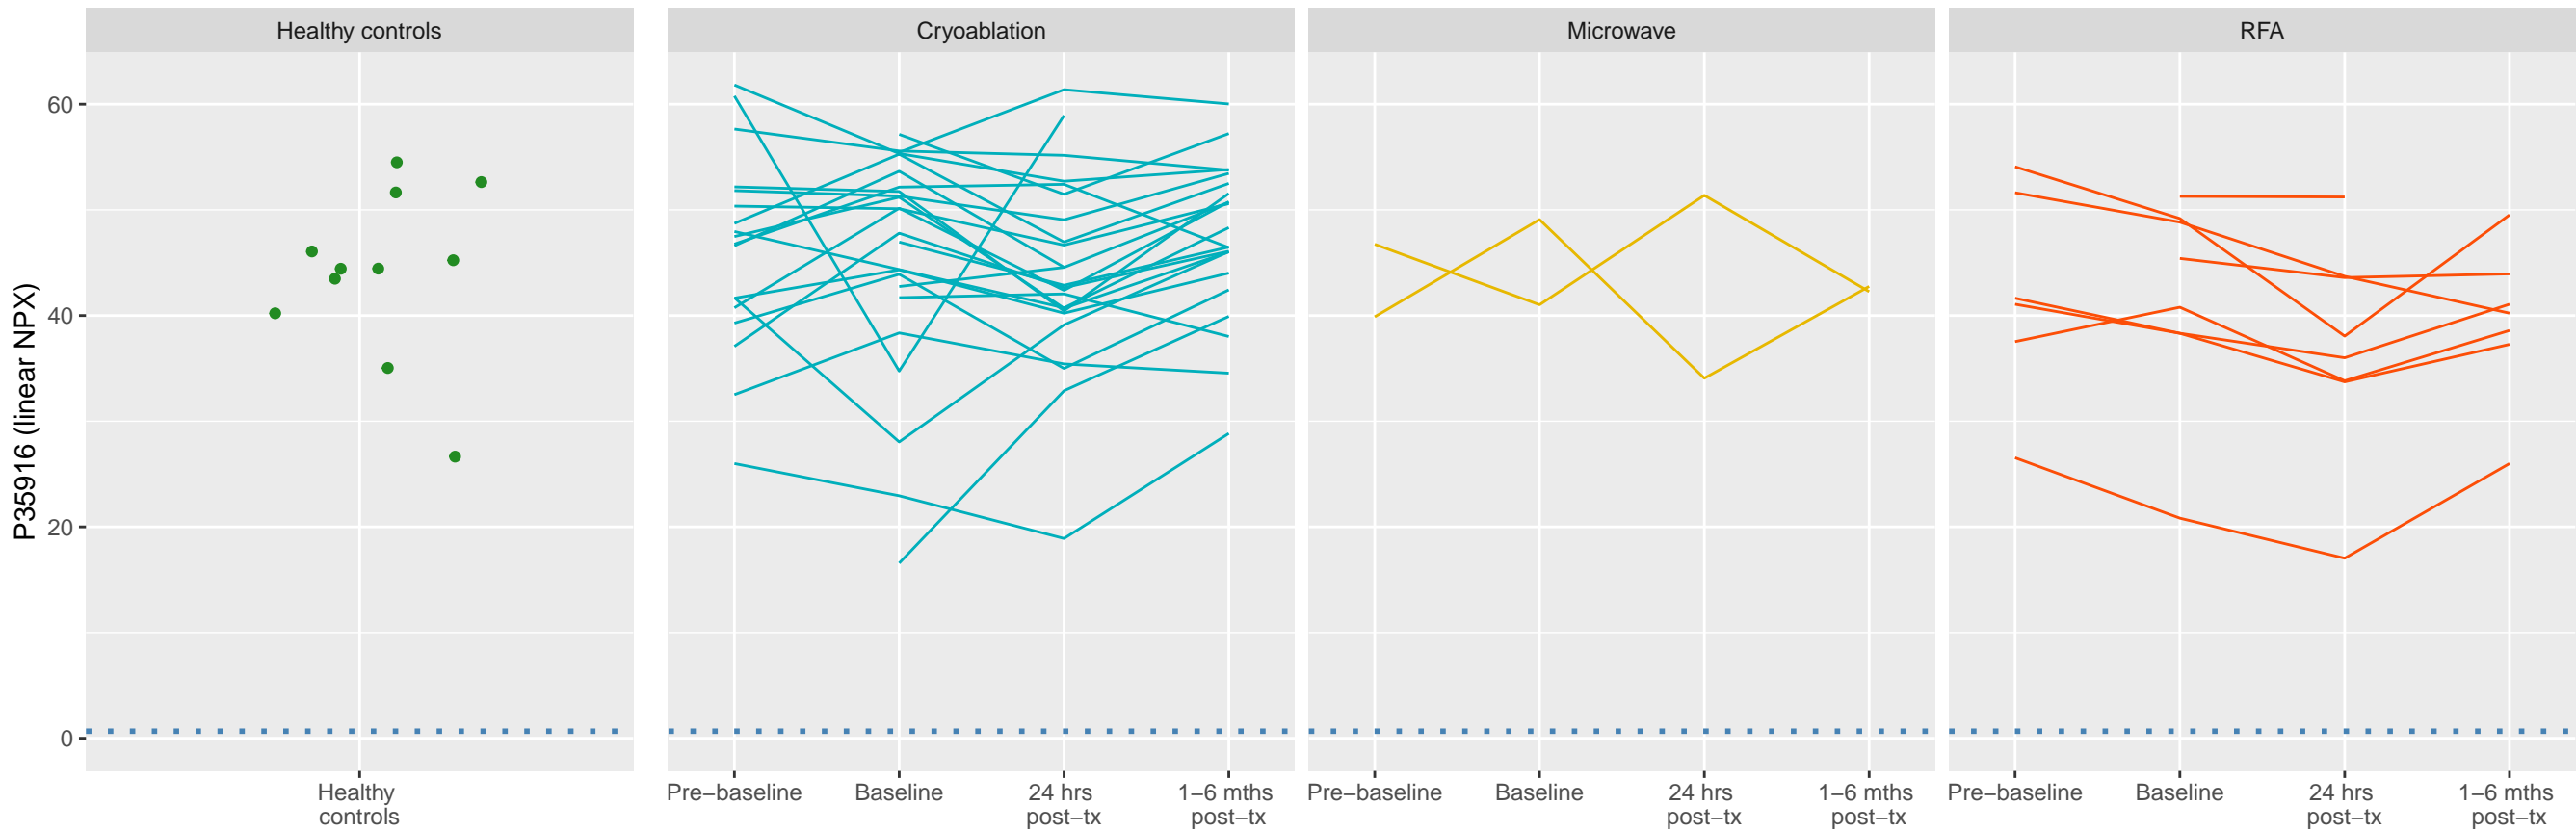

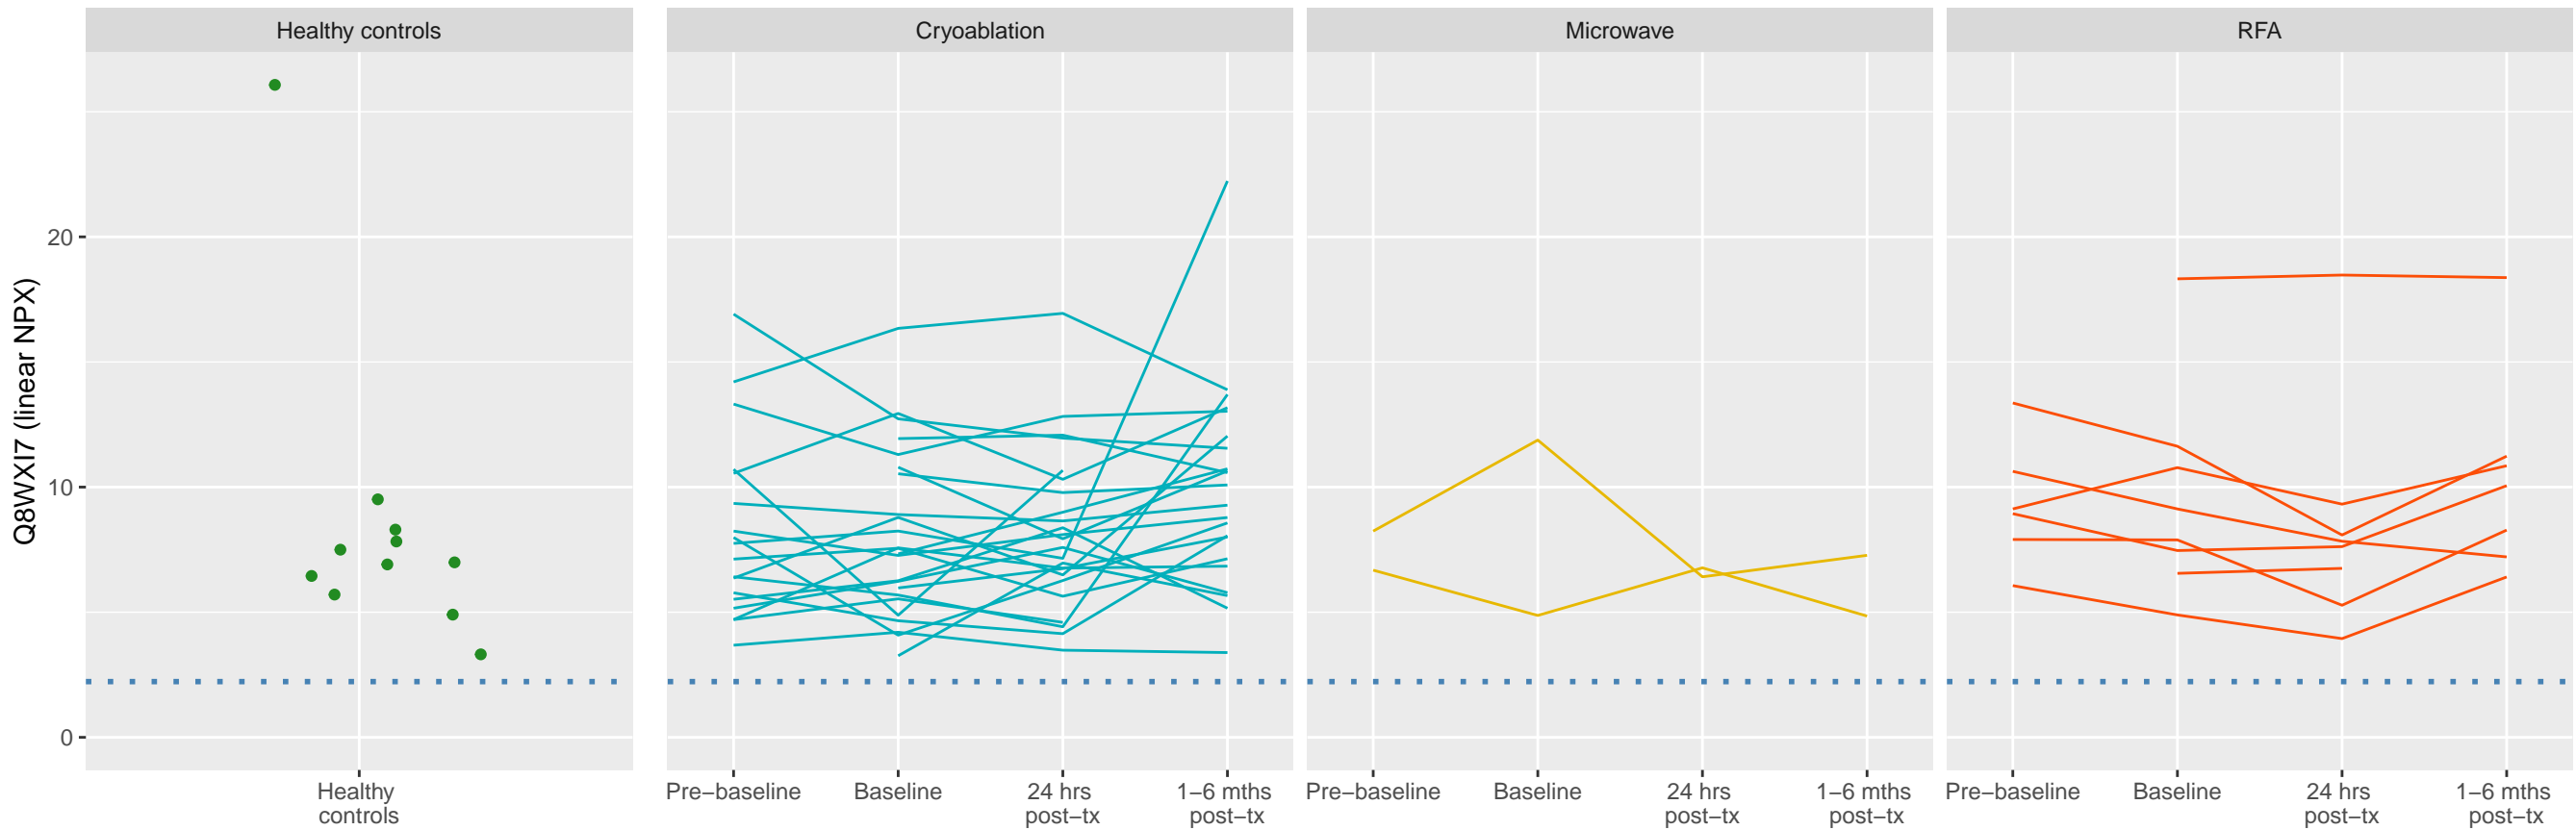



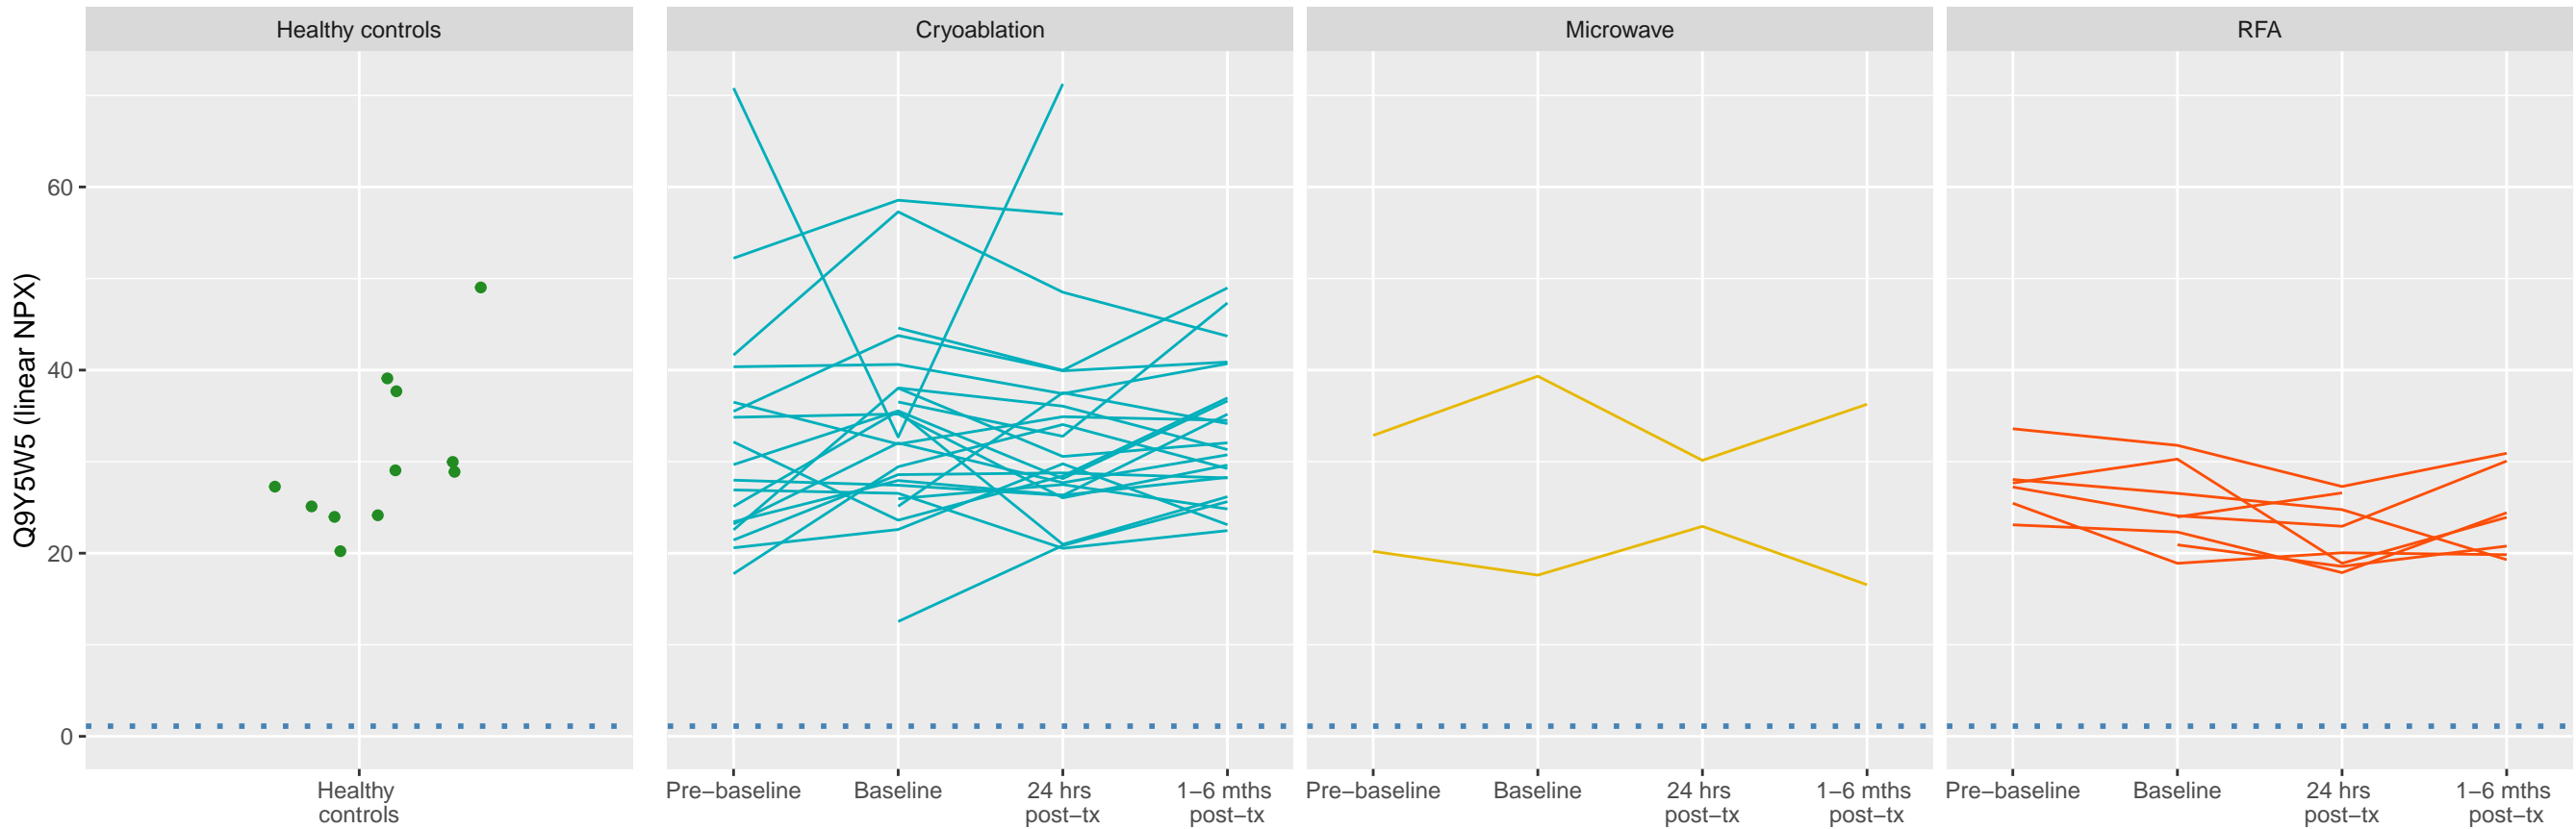

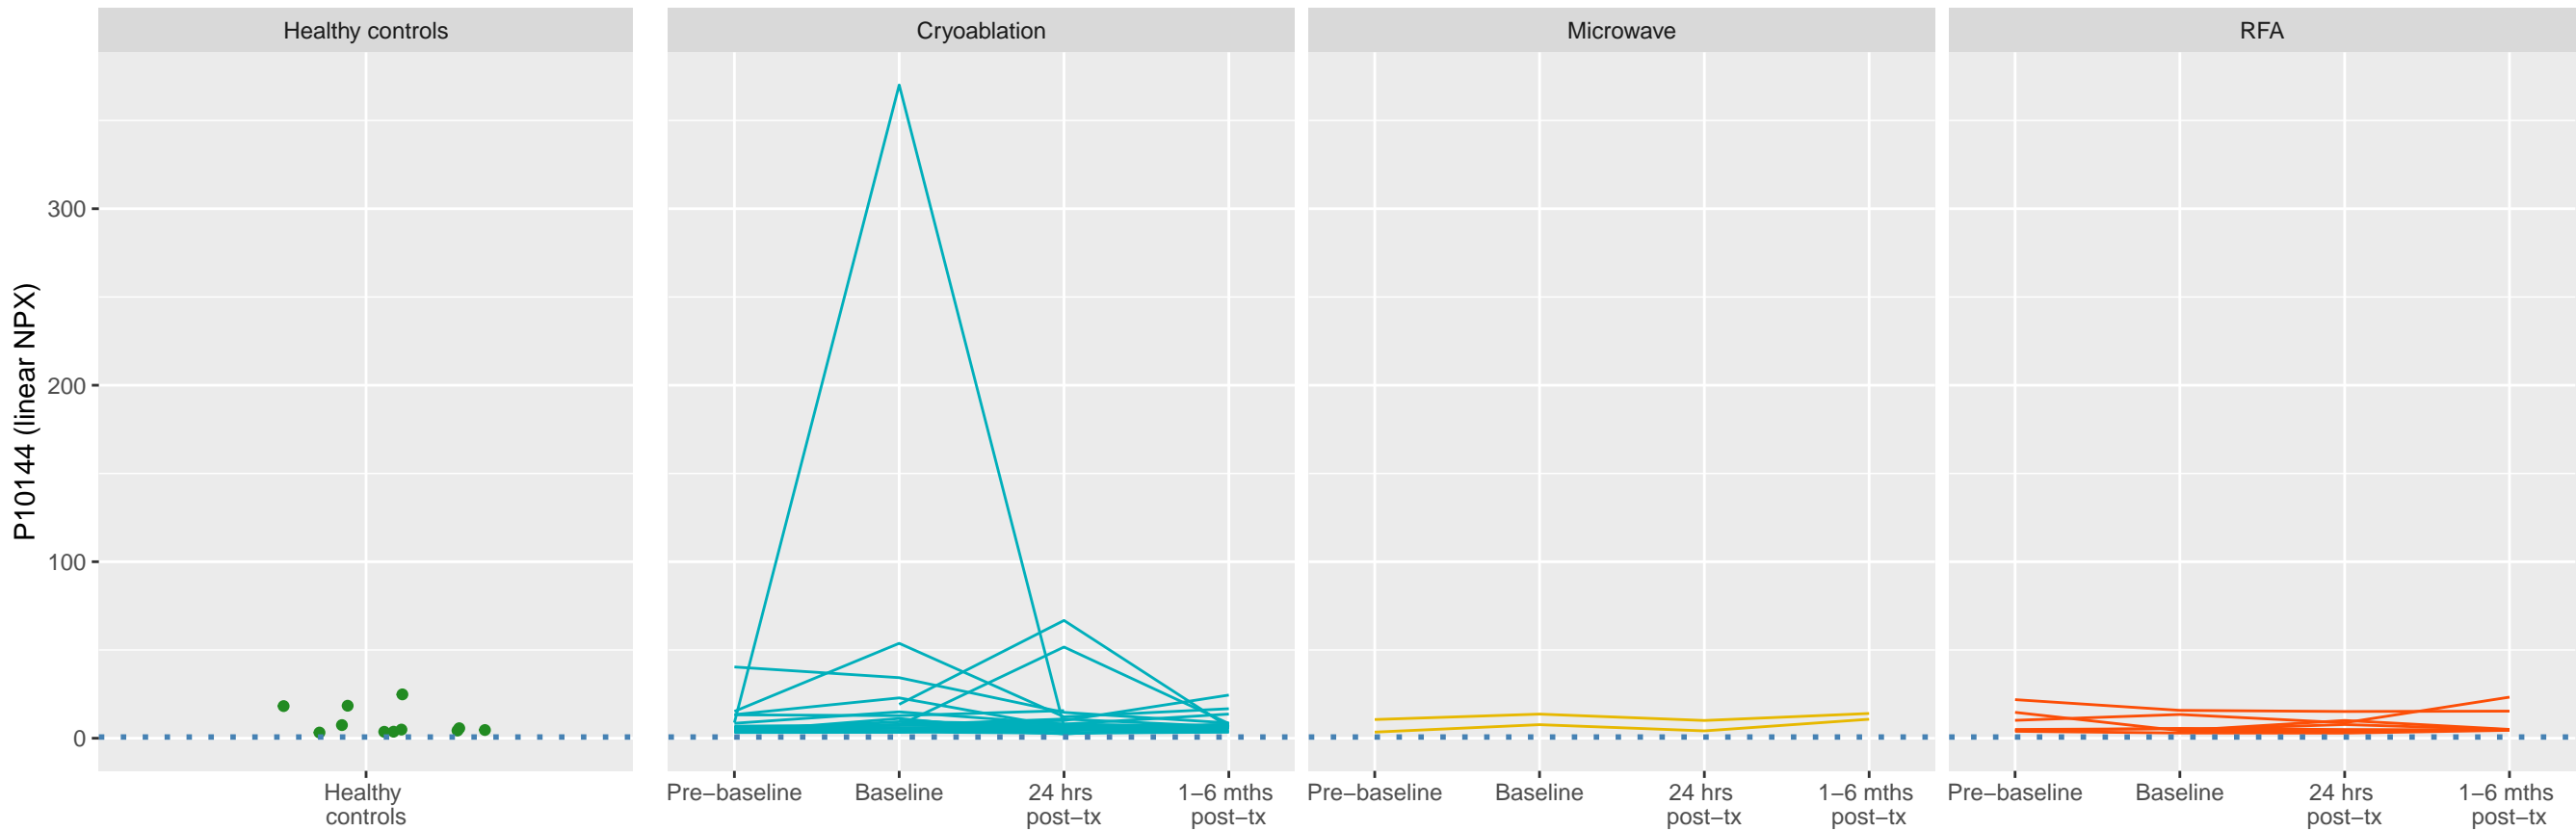

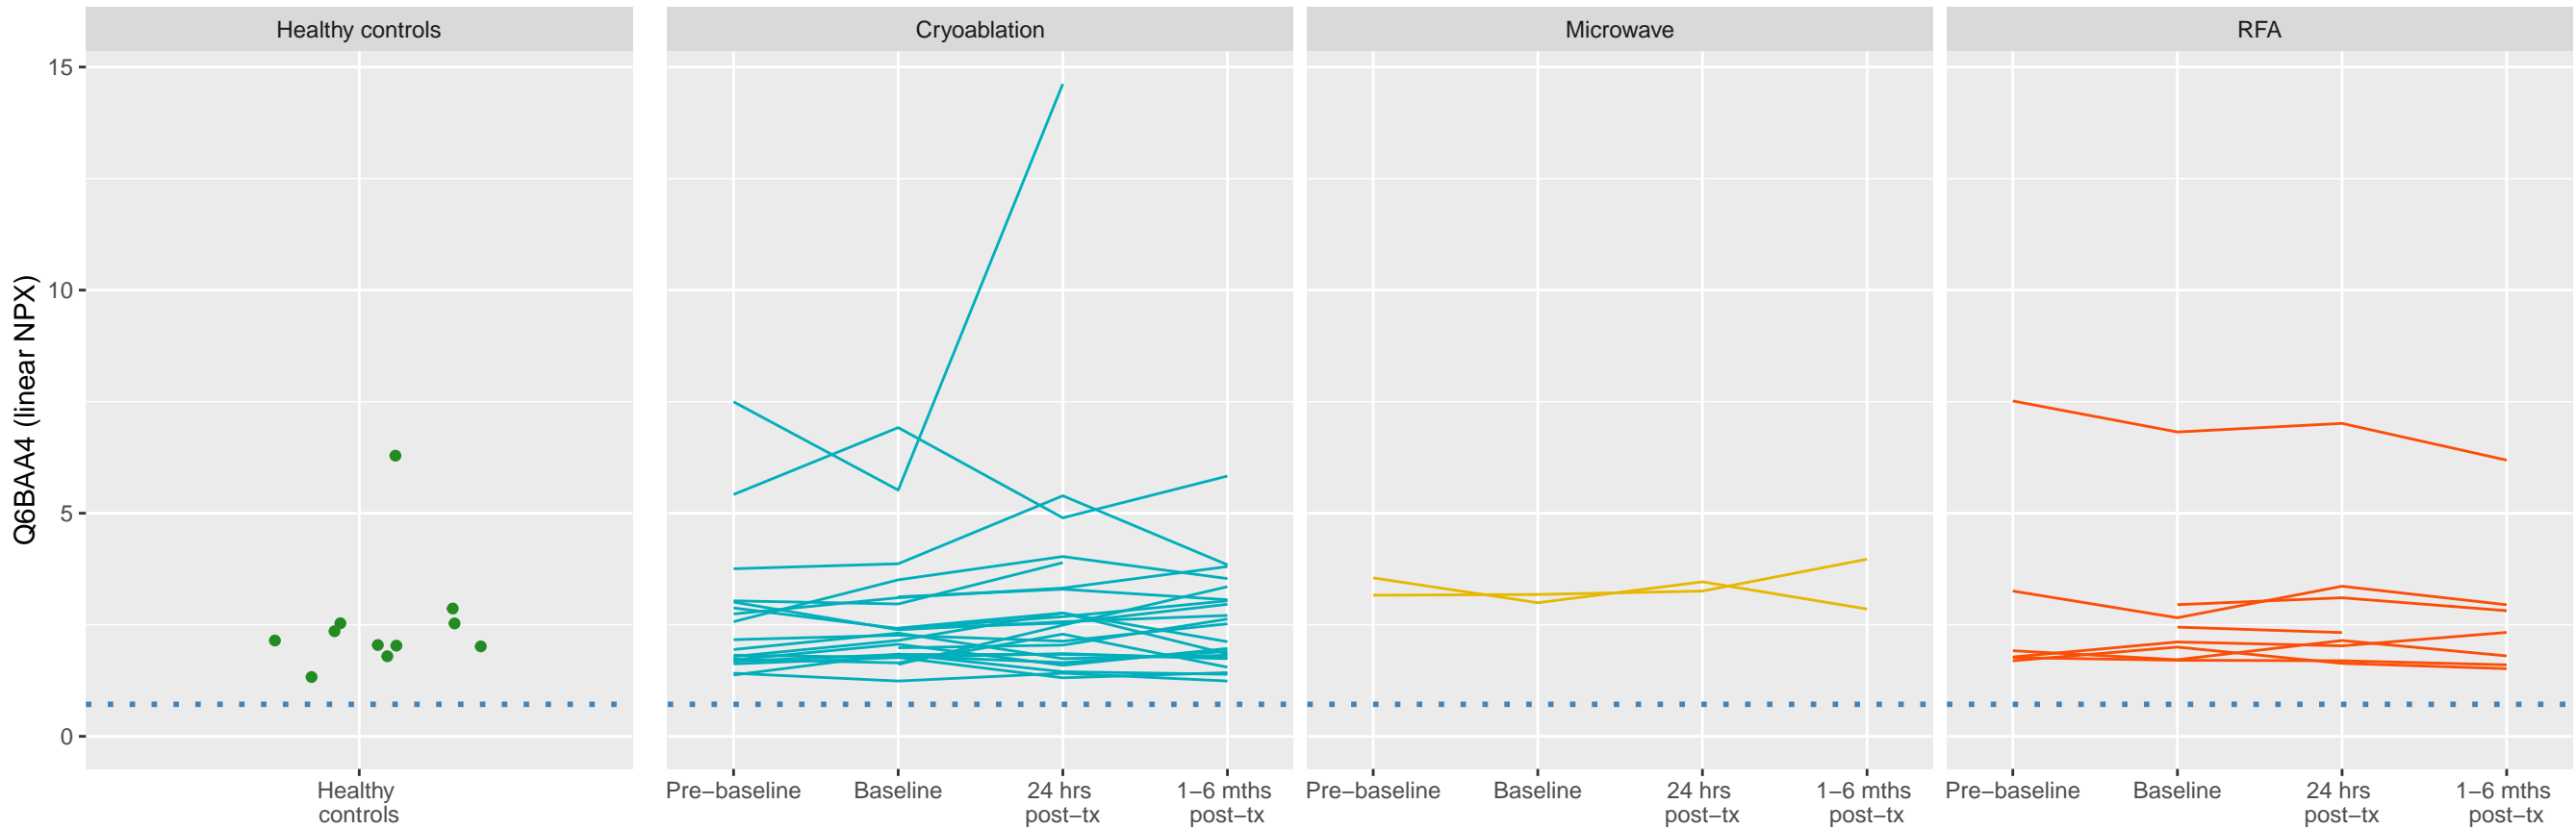

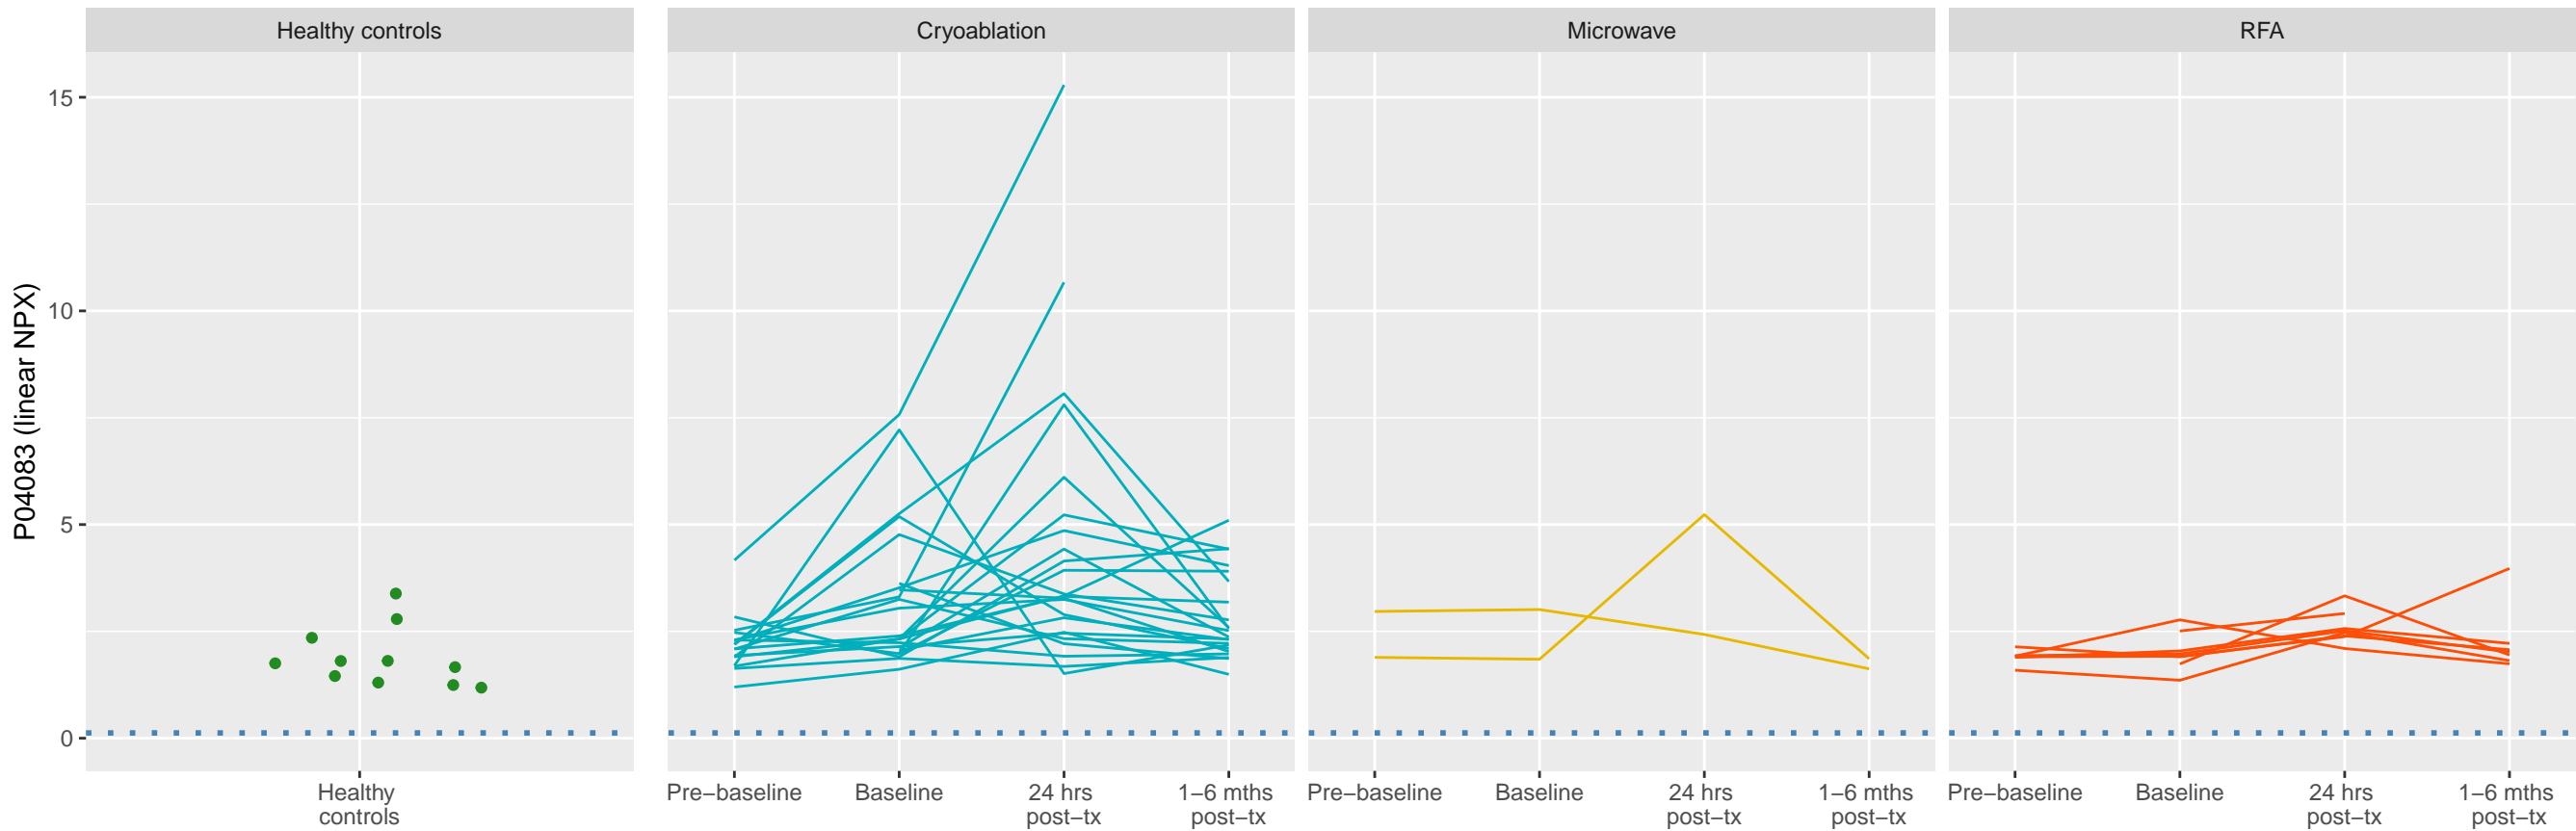

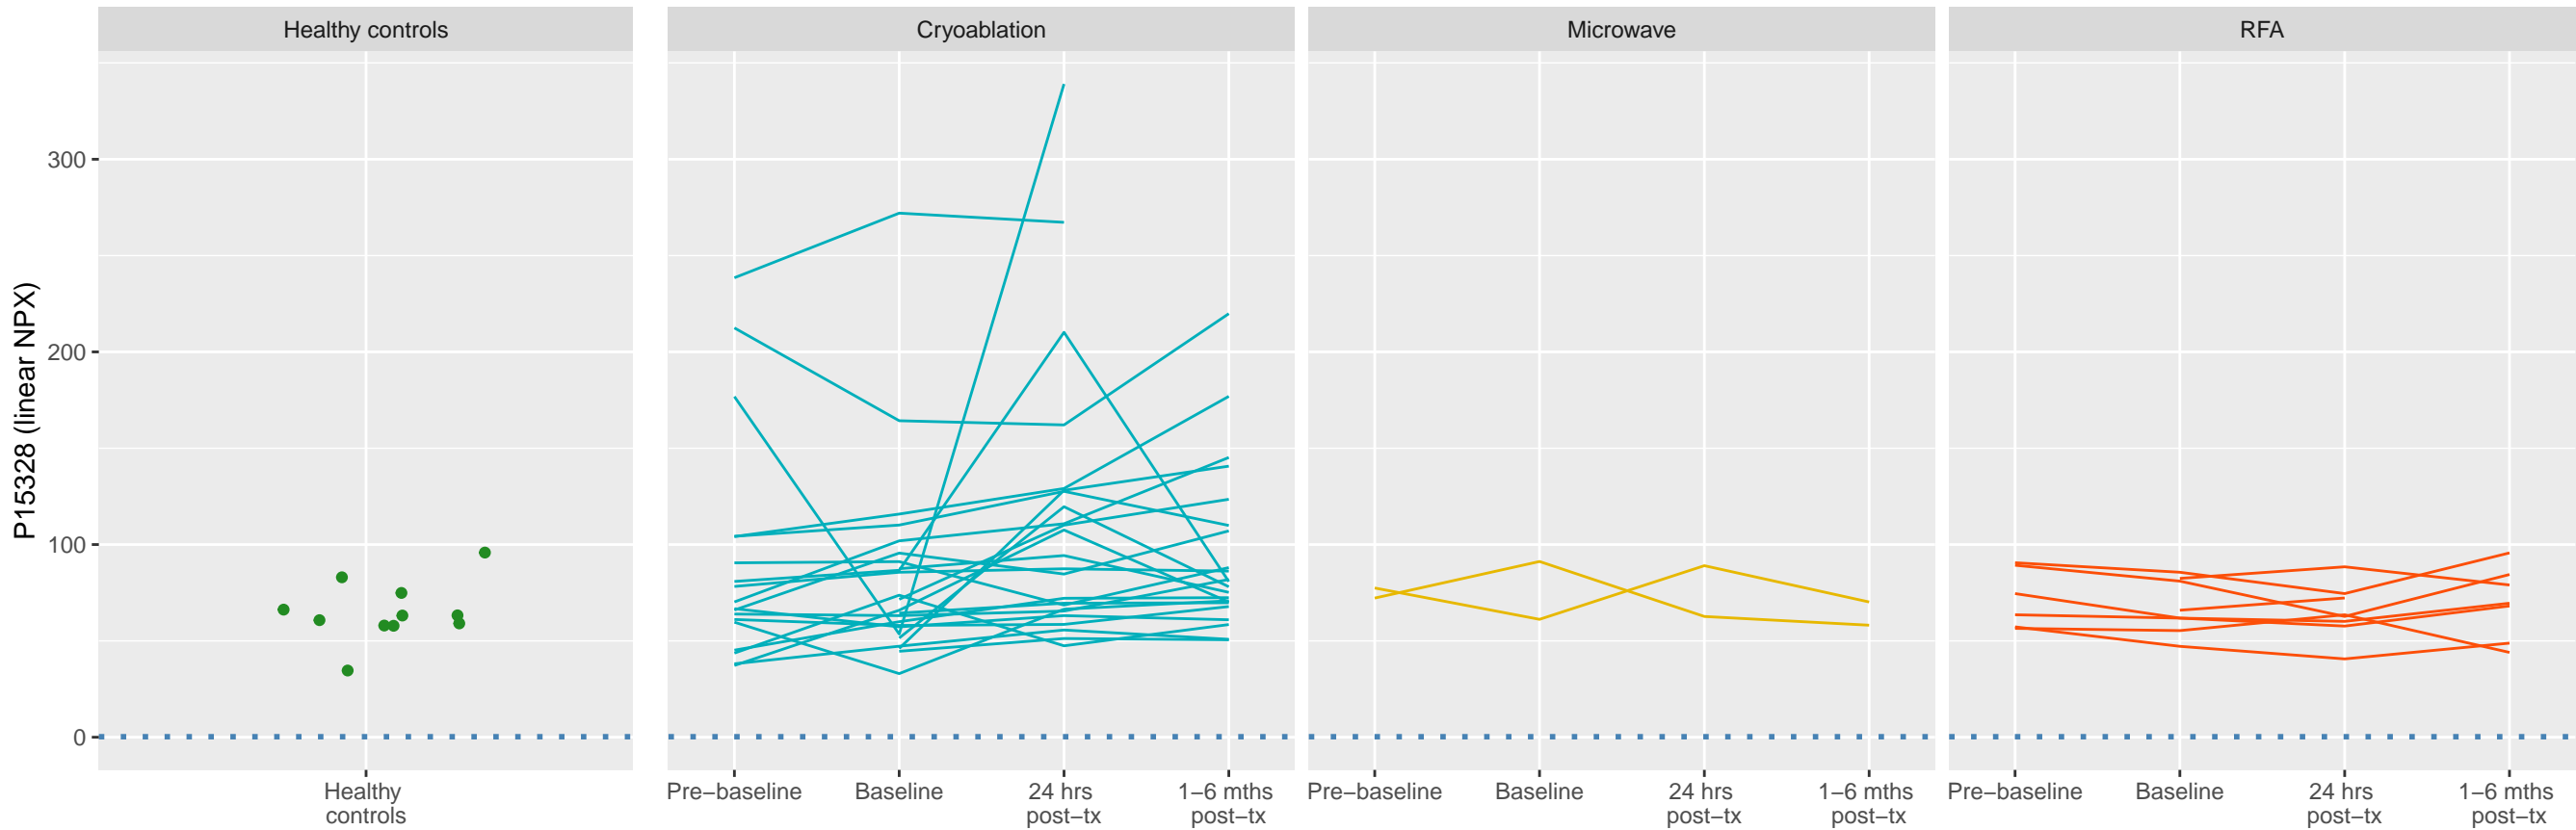

Supplement: s1 [file s1]
