# Supplementary material for: An Exploratory Analysis of Changes in Circulating Plasma Protein Profiles Following Image-Guided Ablation of Renal Tumours Provides Evidence for Effects on Multiple Biological Processes
Source: MDPI journal article supplement (doi:10.3390/cancers13236037), 2021-11-30

**Figure S6.** Longitudinal profiles of plasma proteins which decreased significantly ( $p < 0.05$  and  $q < 0.01$ ; TP3 vs TP2) in patients 24 hours post-CRYO ( $n=24$  patients as one TP3 sample failed analytical QC). Results for each protein are expressed as a % of the reference baseline (TP2; 100%).

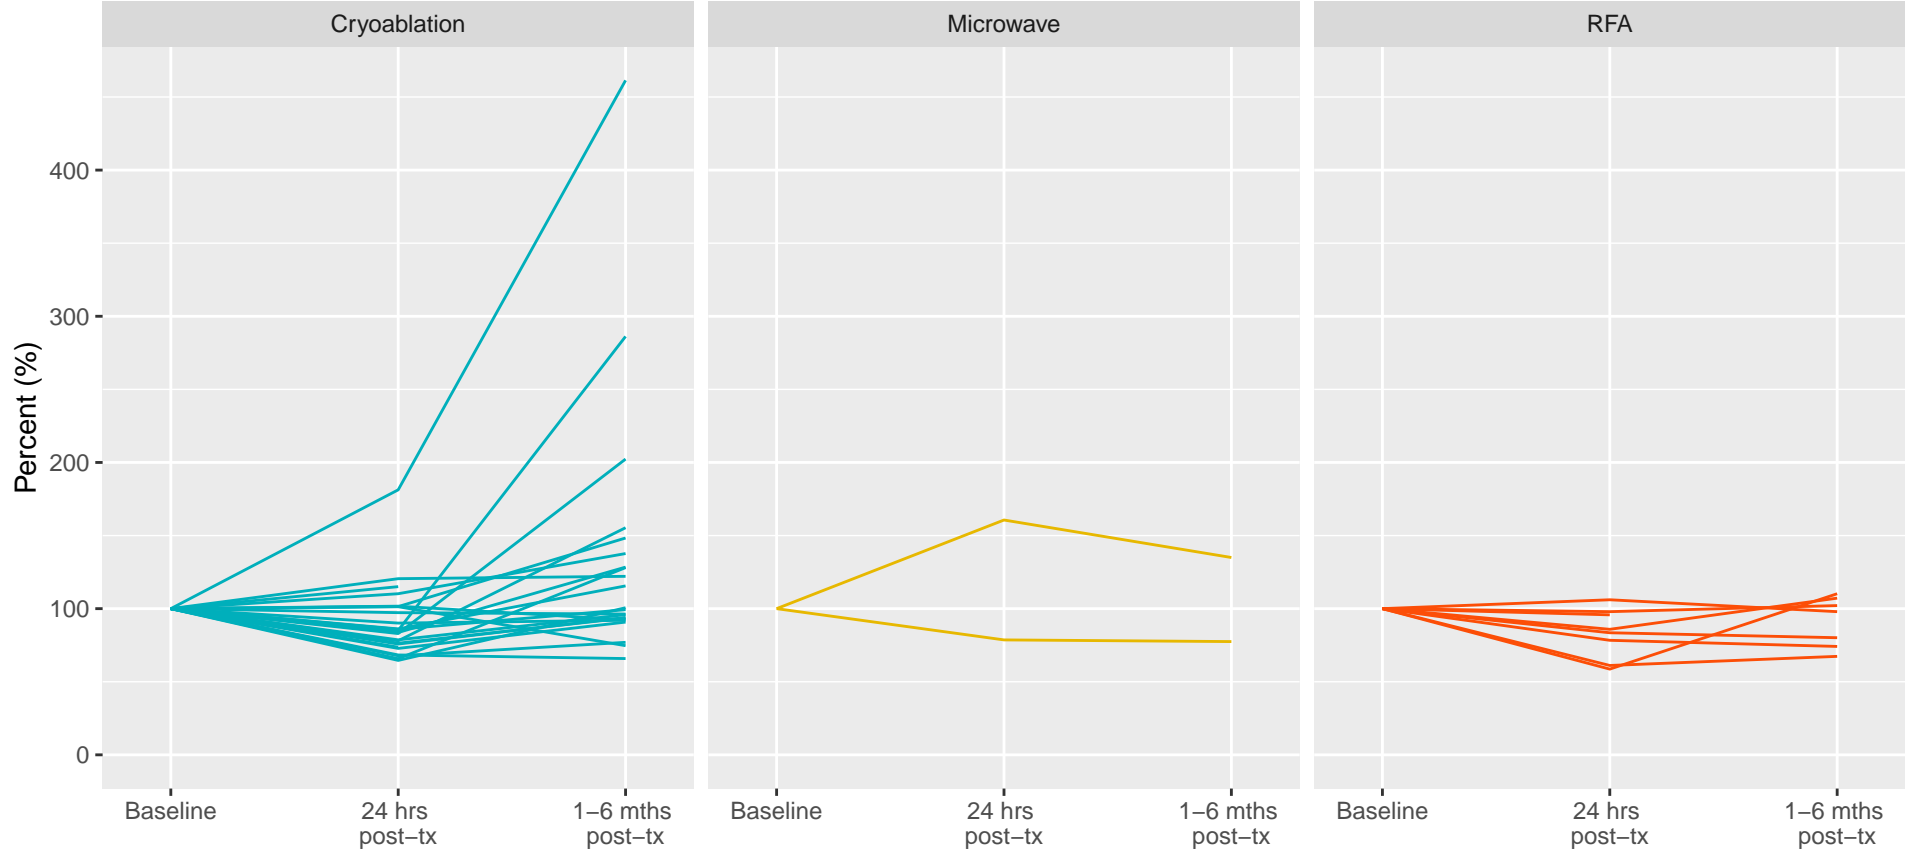

Uniprot ID: Q15389, analyte: ANGPT1

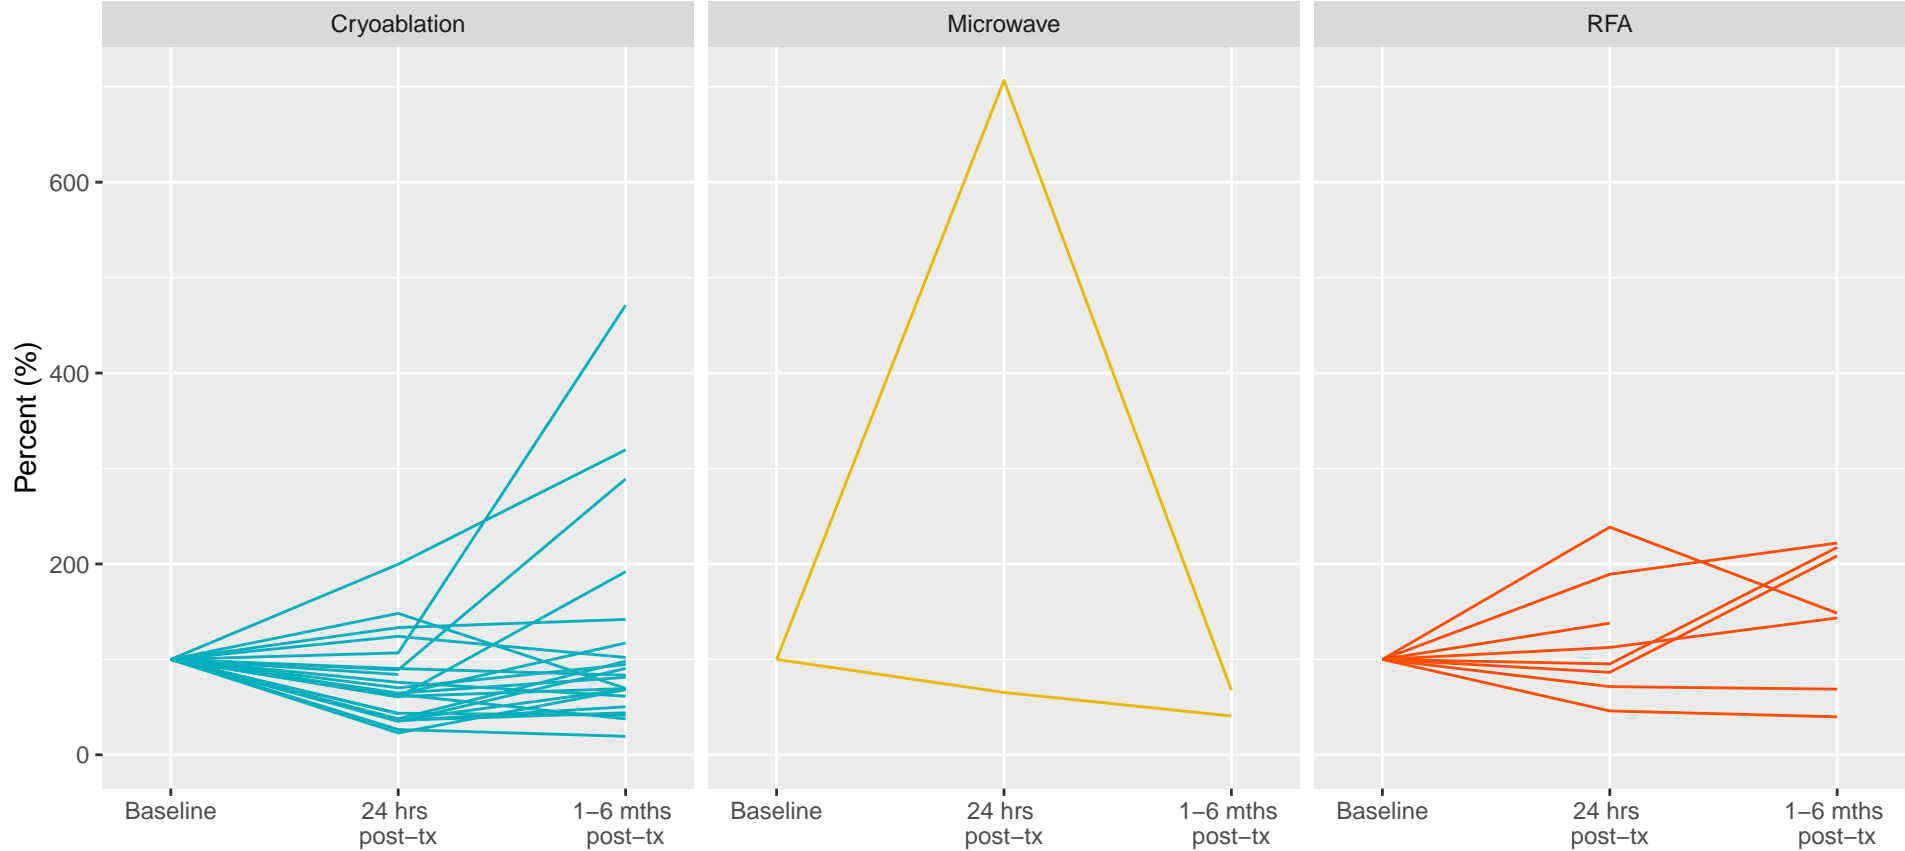

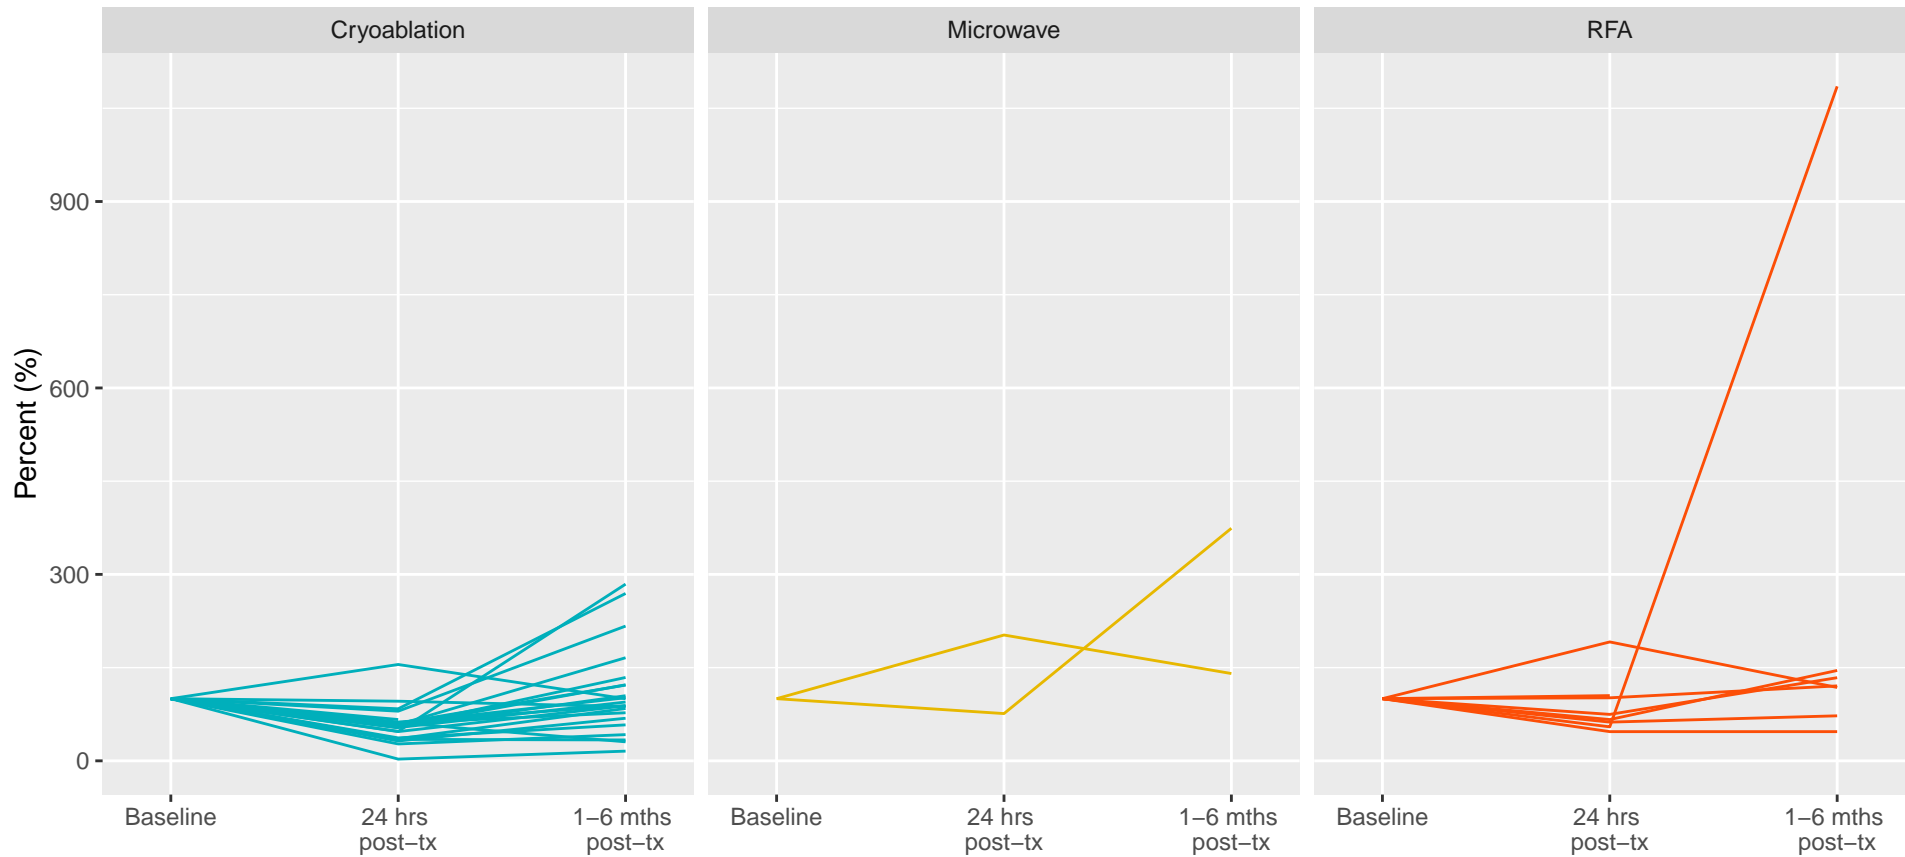

Uniprot ID: Q99616, analyte: MCP-4

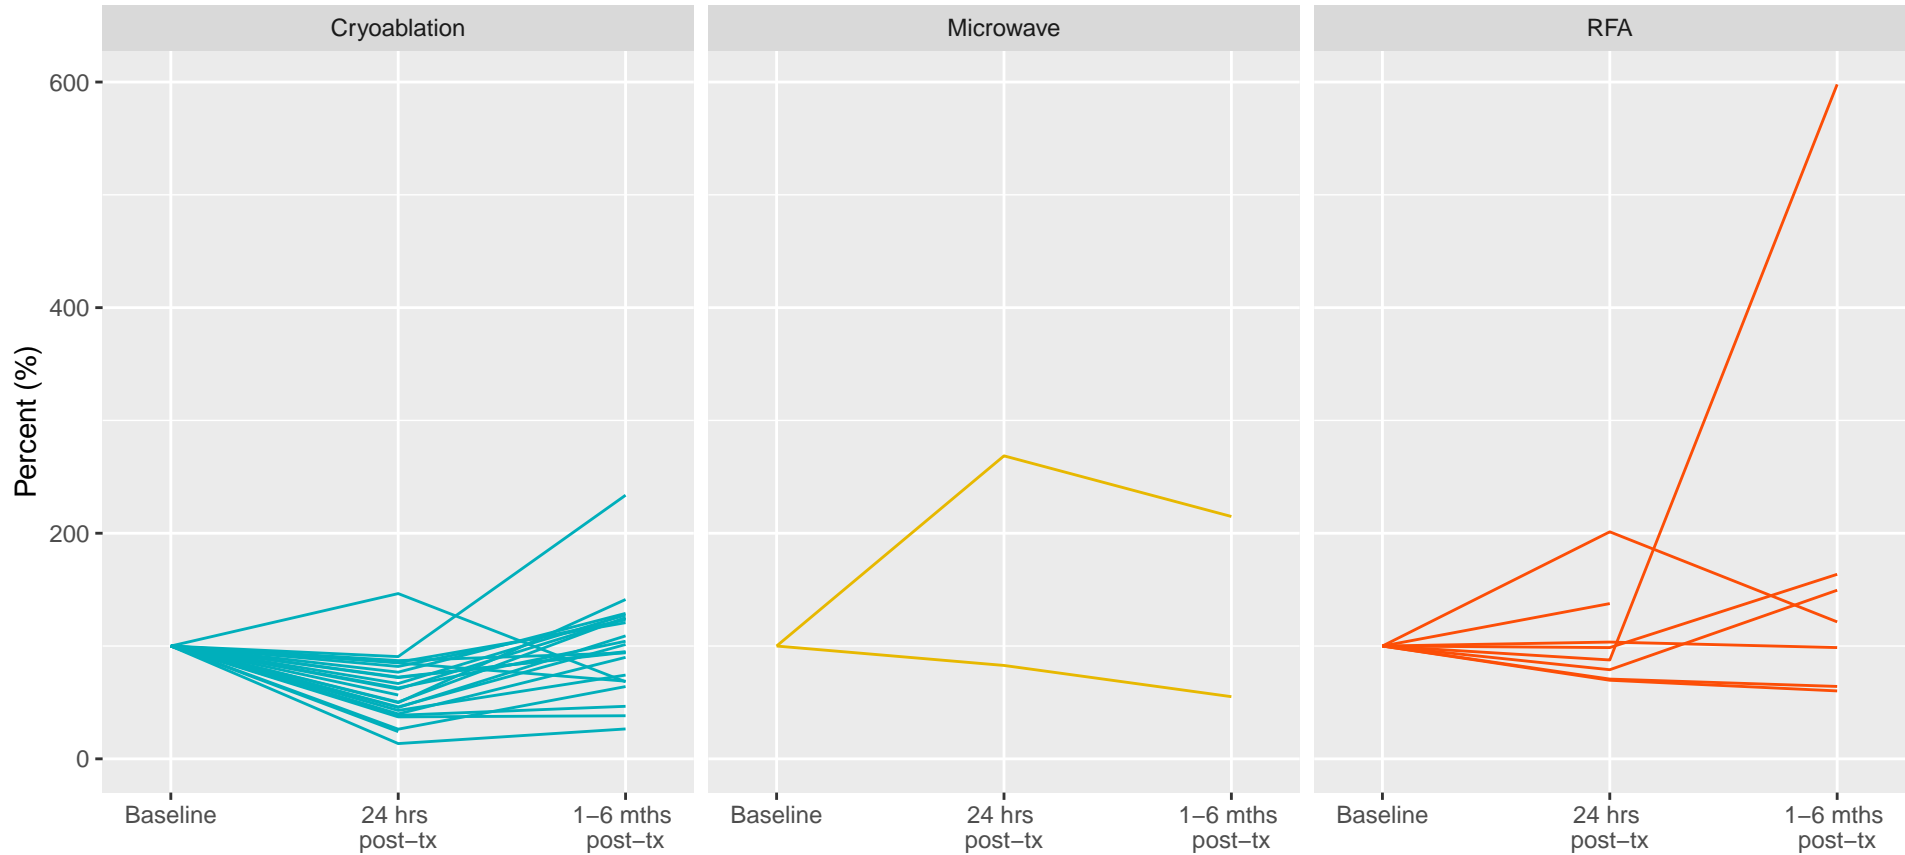

Uniprot ID: P50591, analyte: TRAIL

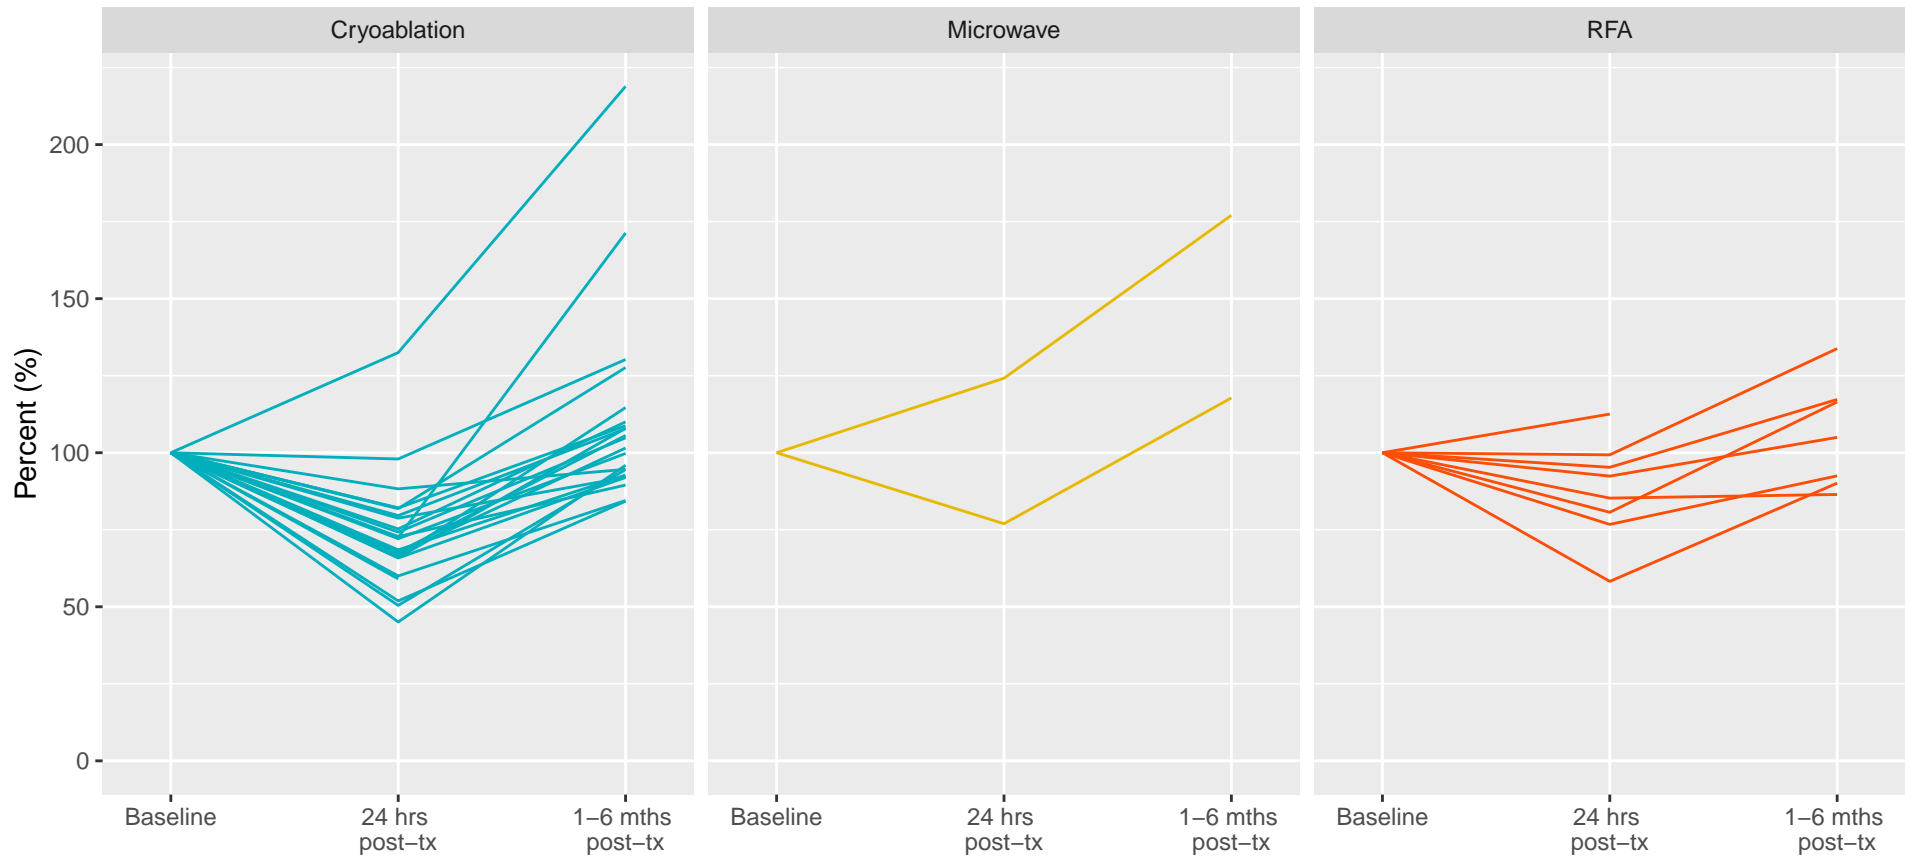

## Uniprot ID: P09038, analyte: FGF2

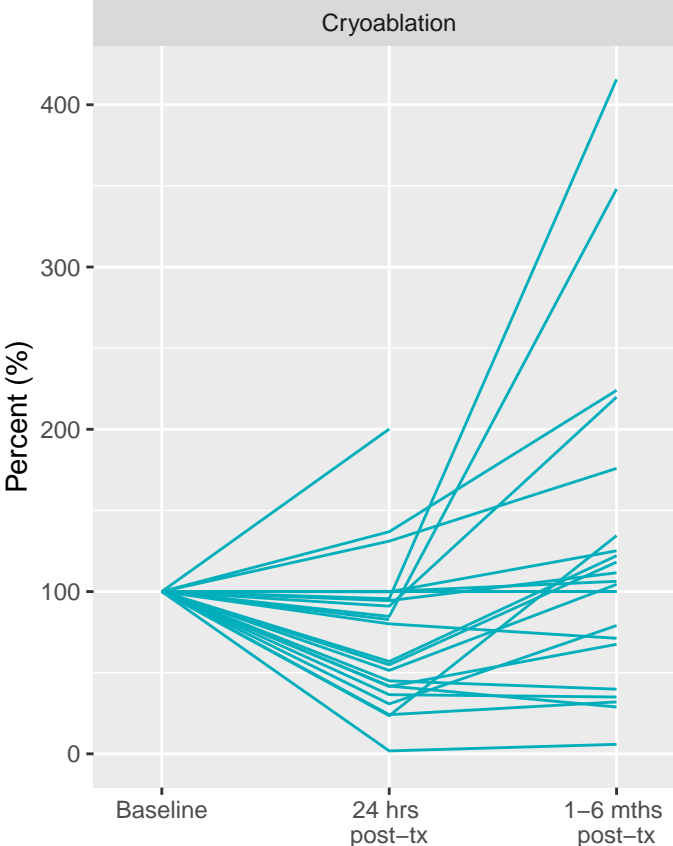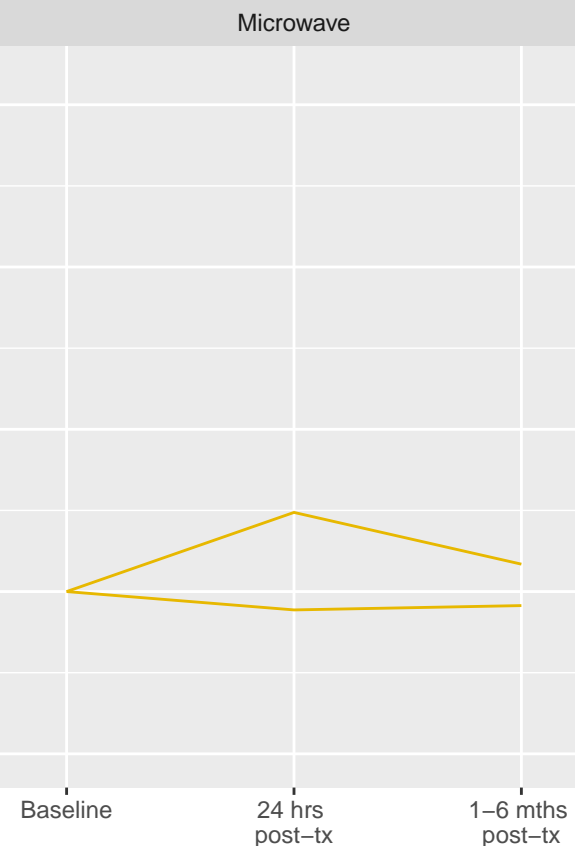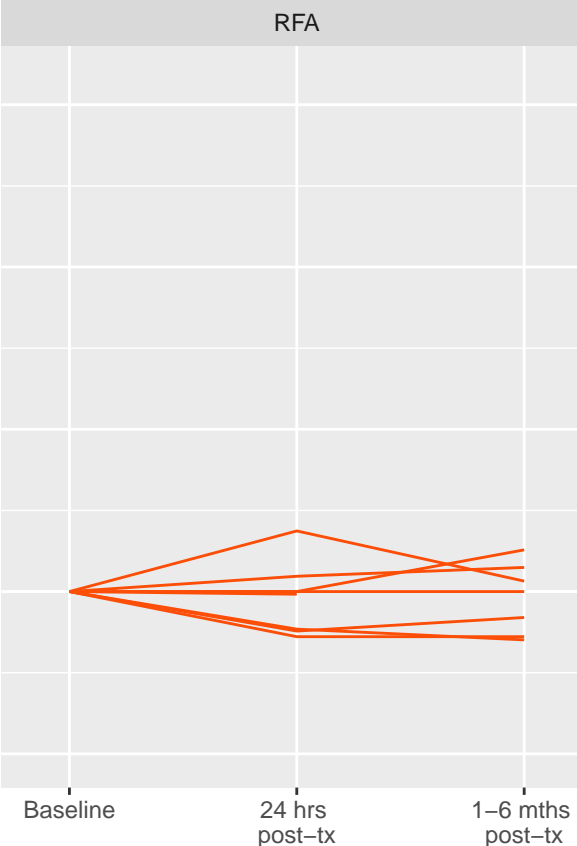





Uniprot ID: P48023, analyte: FASLG

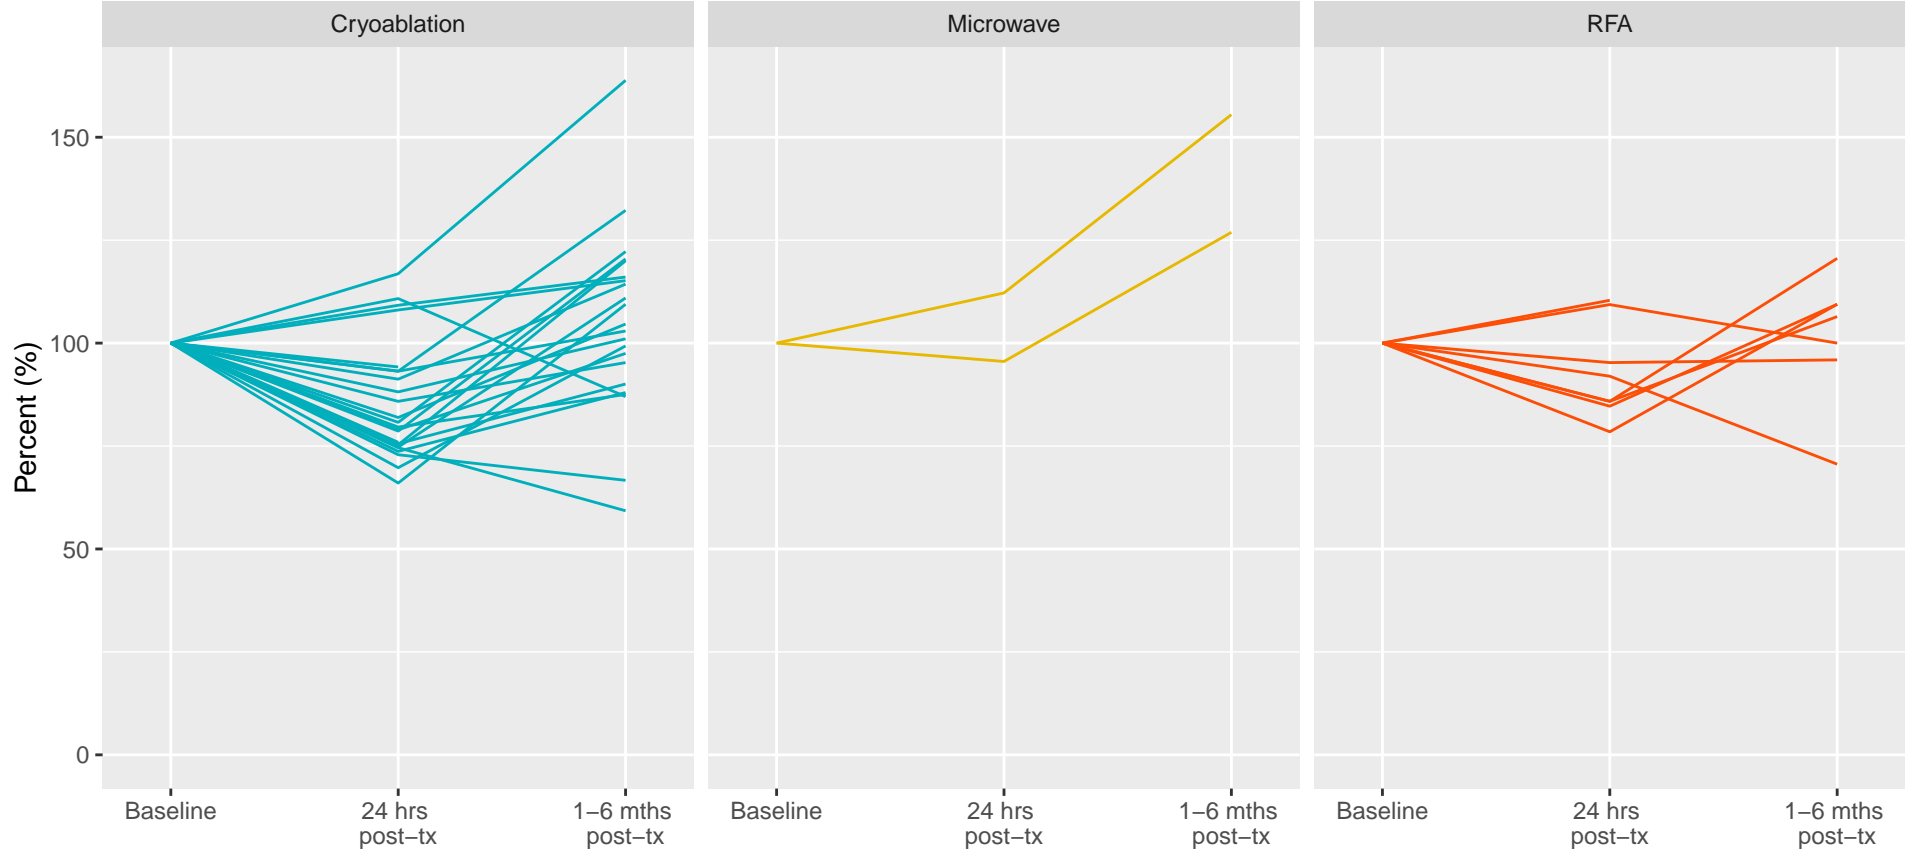

Uniprot ID: P80075, analyte: MCP-2

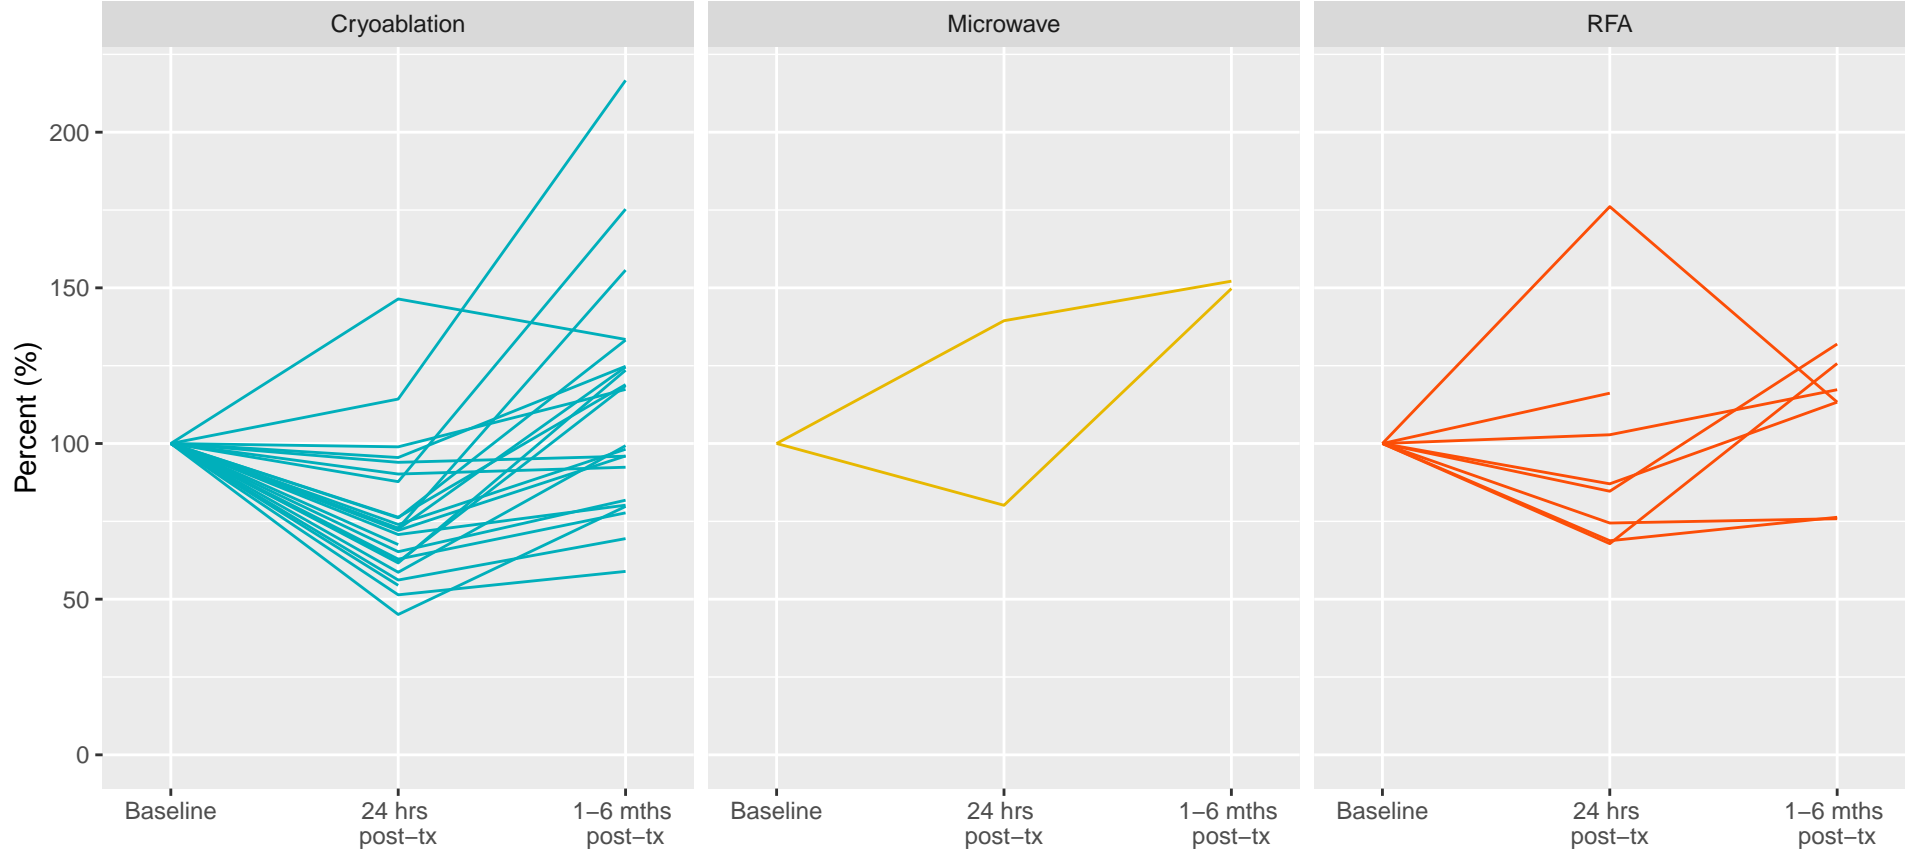

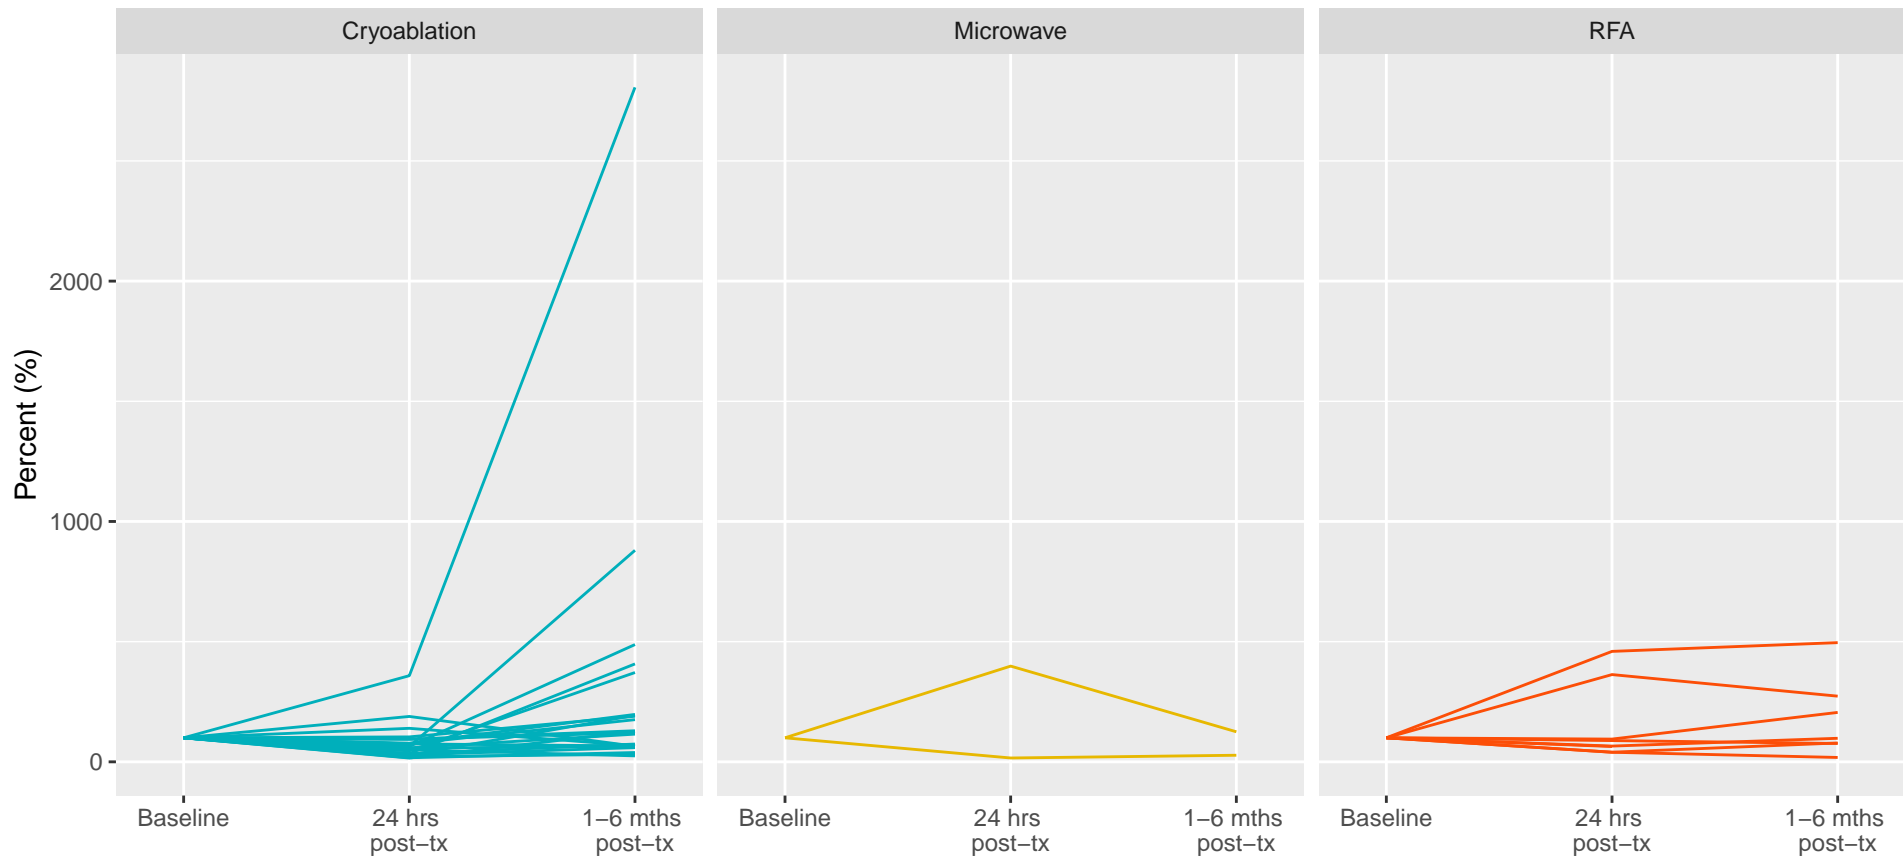

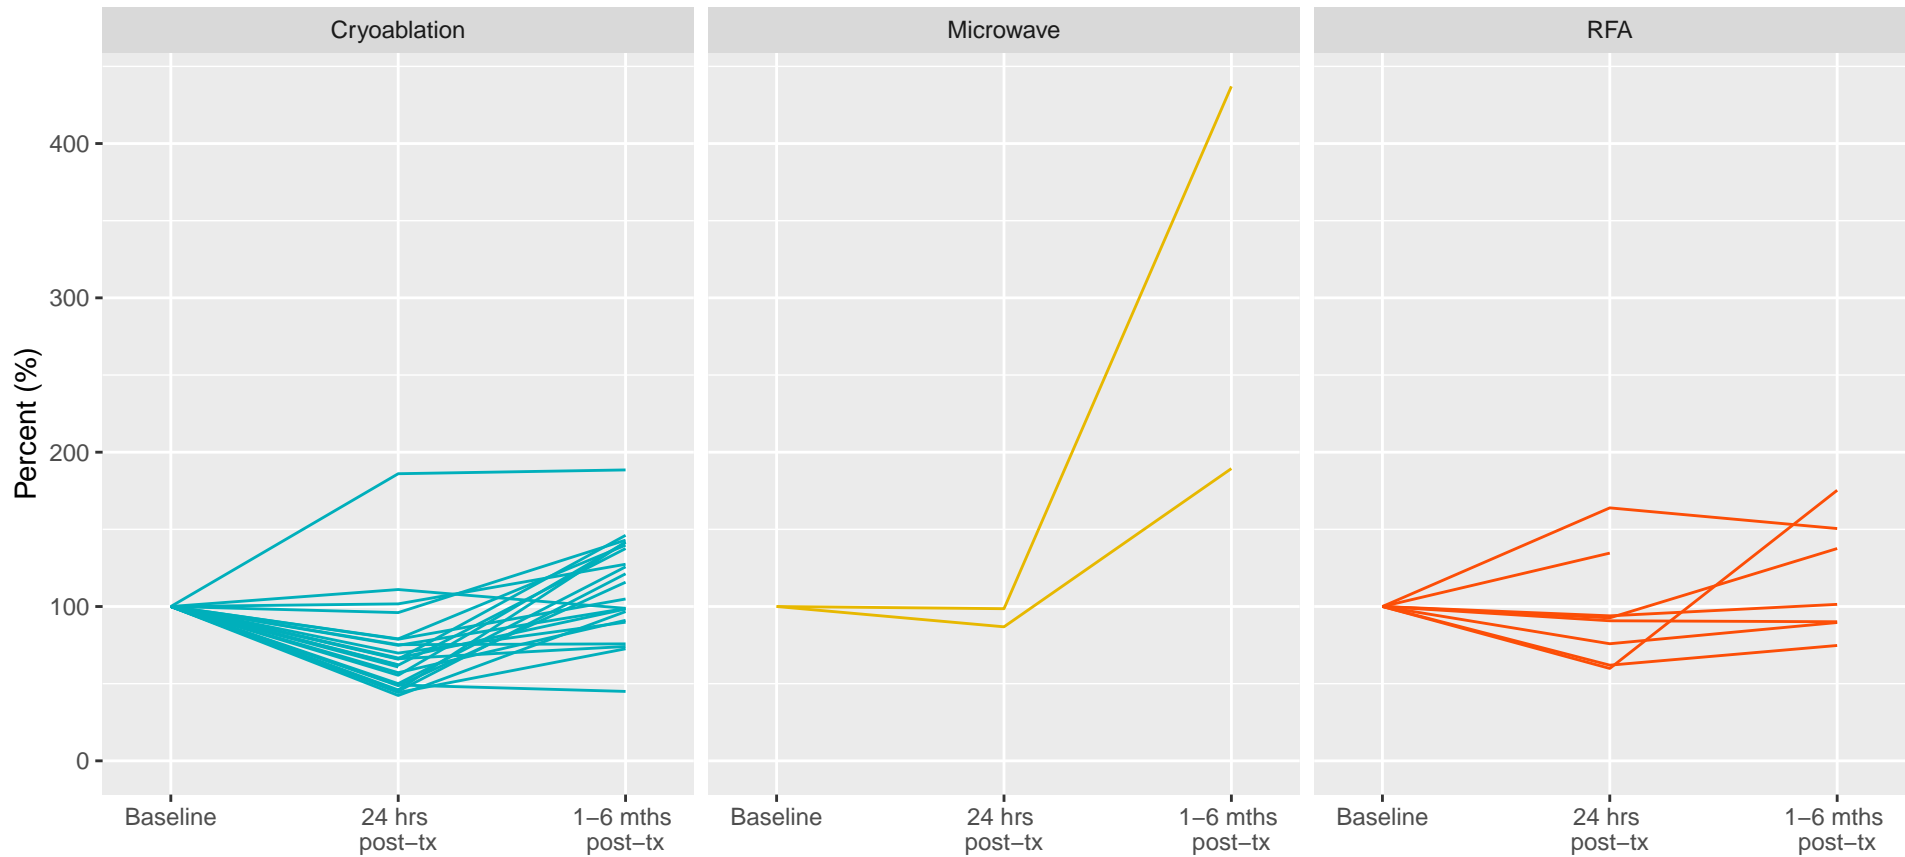

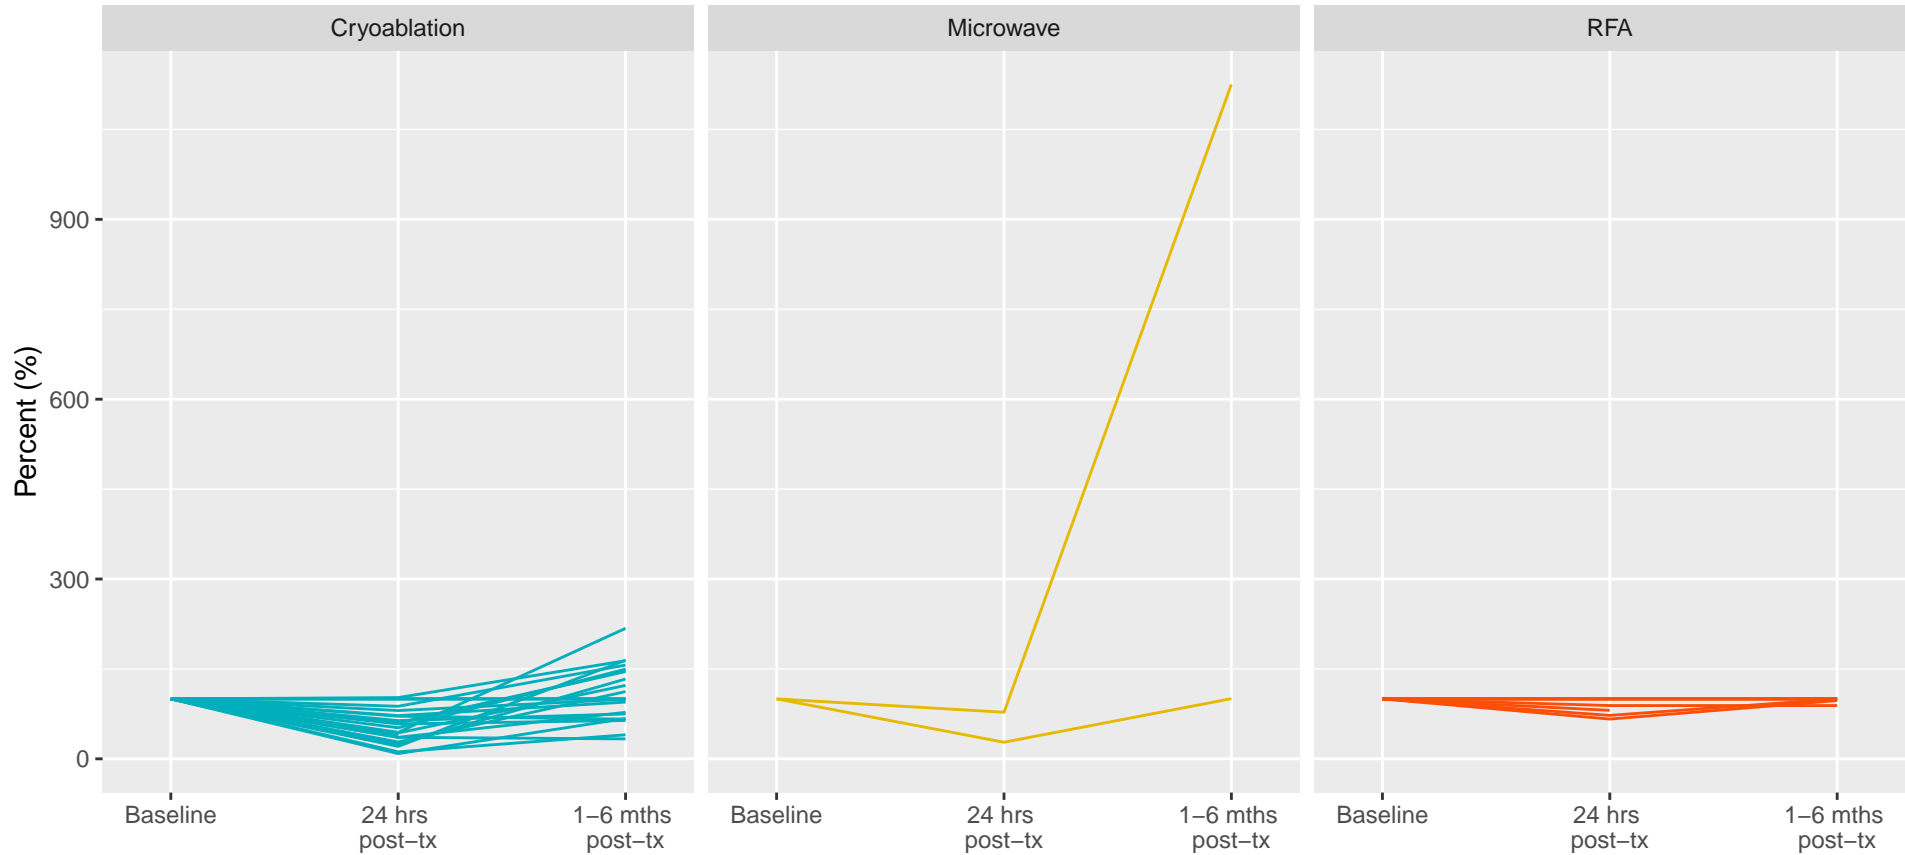

Uniprot ID: P39900, analyte: MMP12

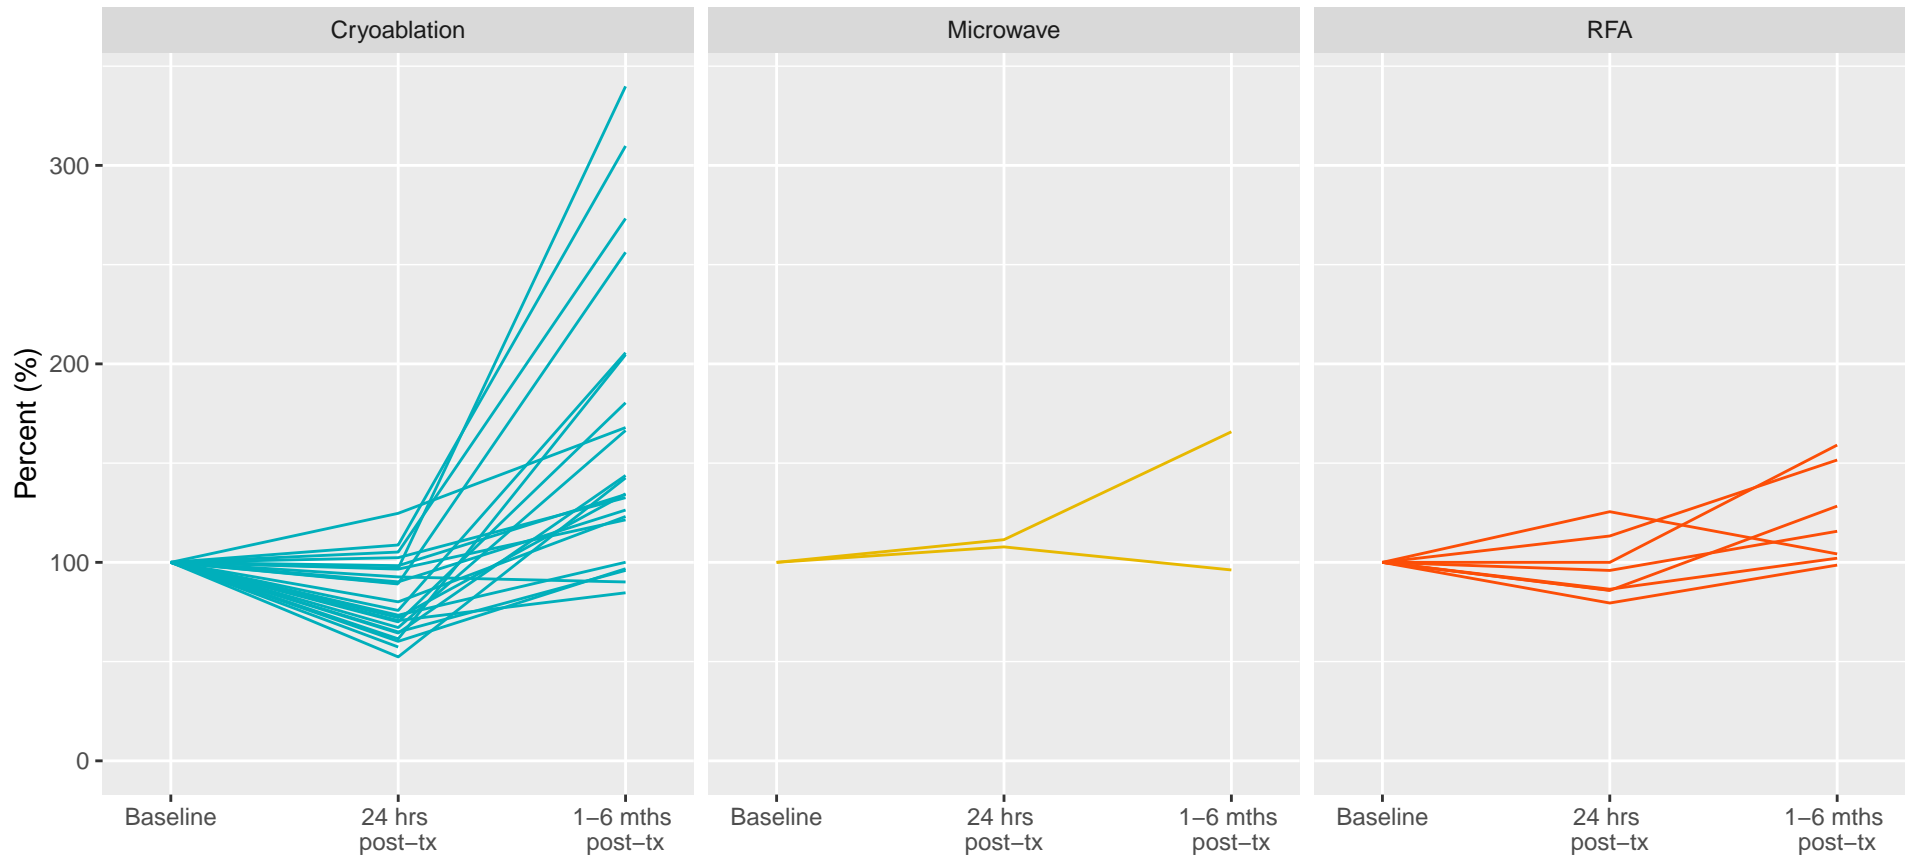

Uniprot ID: P35968, analyte: VEGFR-2

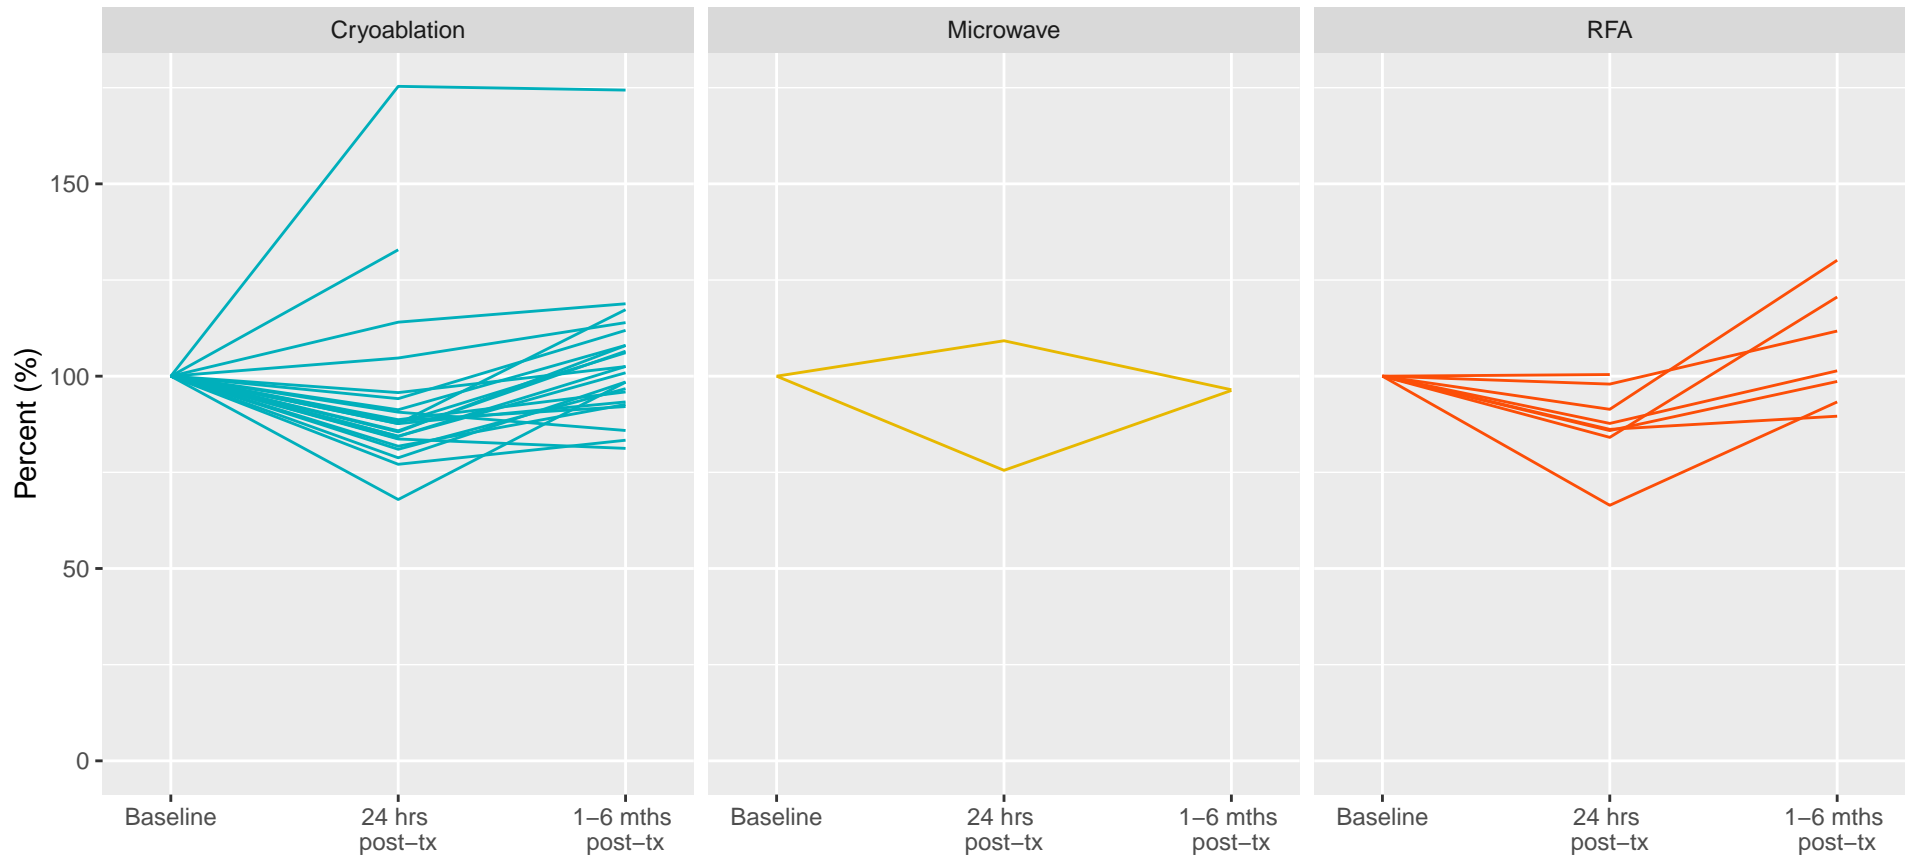

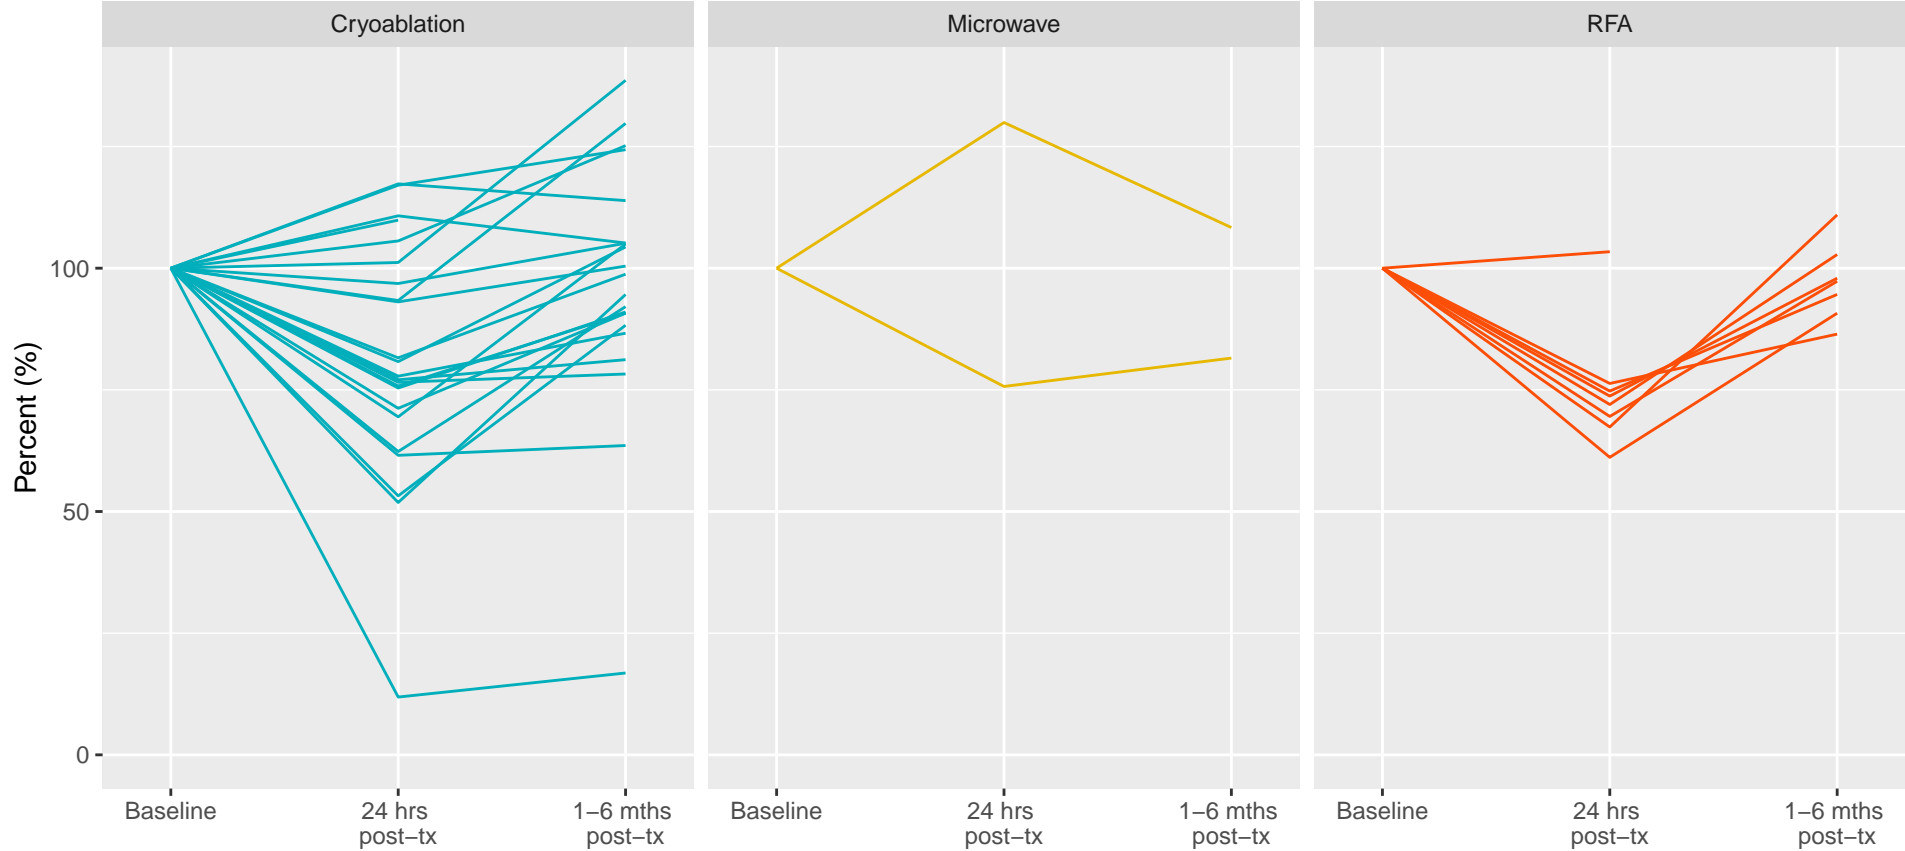



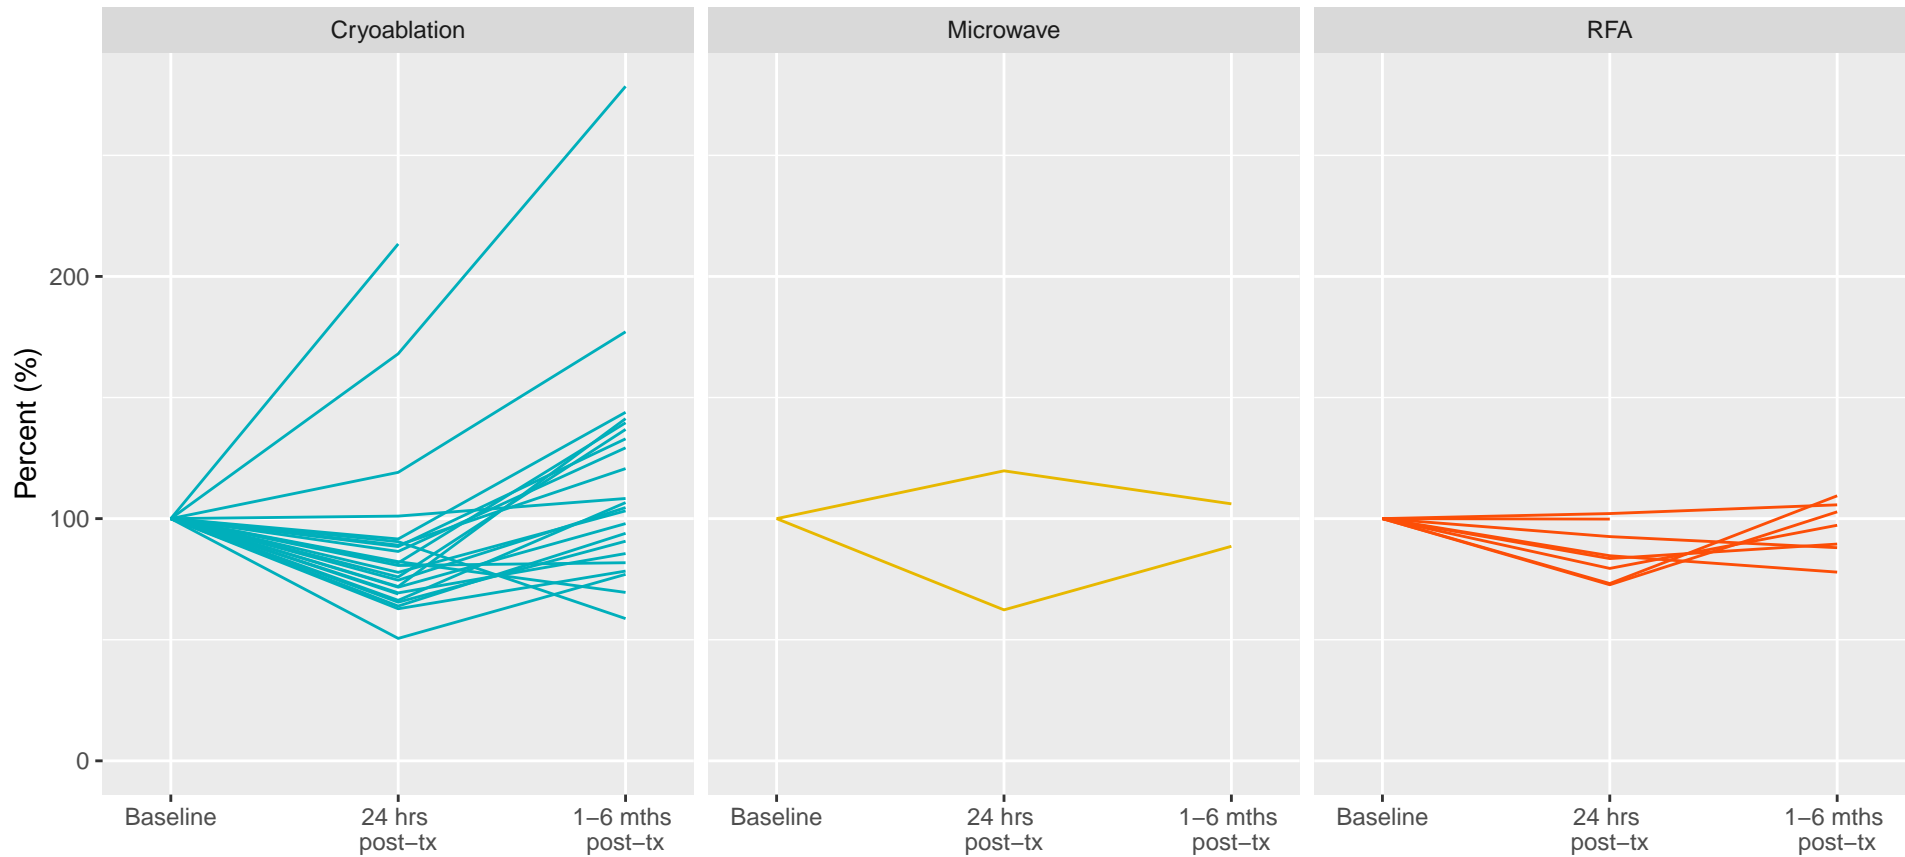

Uniprot ID: Q99717, analyte: MAD homolog 5

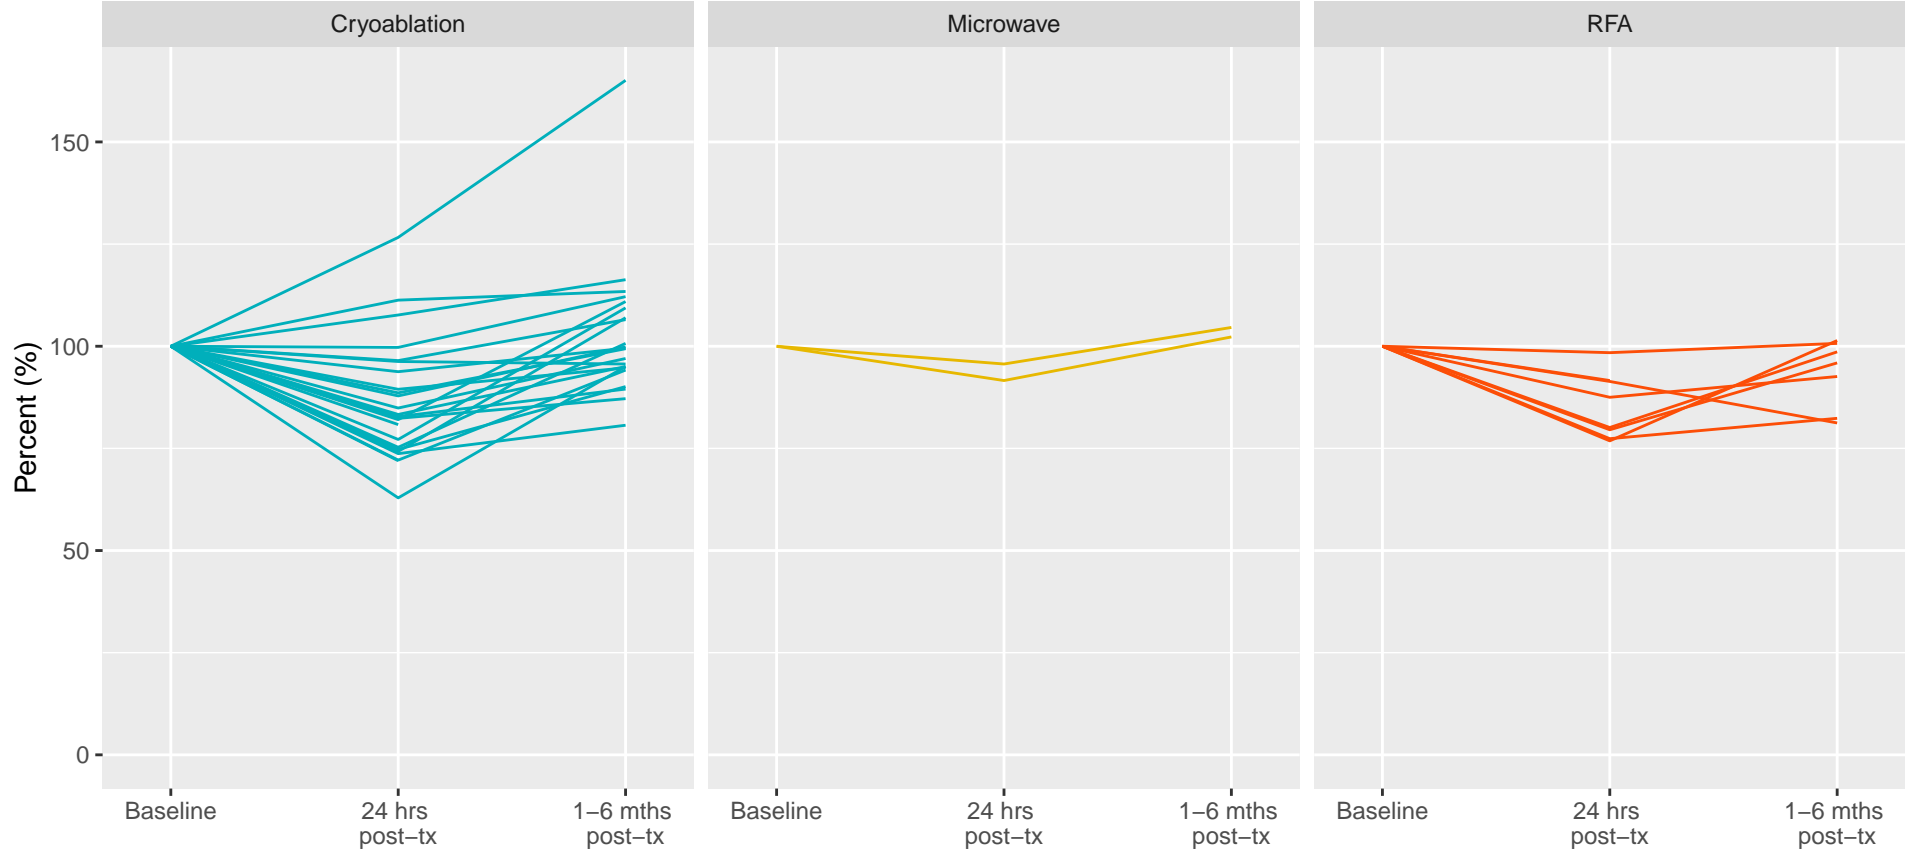

Supplement: s1 [file s1]
