# Supplementary material for: An Exploratory Analysis of Changes in Circulating Plasma Protein Profiles Following Image-Guided Ablation of Renal Tumours Provides Evidence for Effects on Multiple Biological Processes
Source: MDPI journal article supplement (doi:10.3390/cancers13236037), 2021-11-30

**Figure S8.** Longitudinal profiles of all plasma proteins on the Immunooncology panel, prior to and post-ablation. Results for each protein are shown as linear NPX values and are shown for patients receiving CRYO (n=25) with the three patients who developed acute complications post-CRYO highlighted. Dotted lines indicate the lower limit of quantitation.

# Uniprot ID: P10145, analyte:IL8

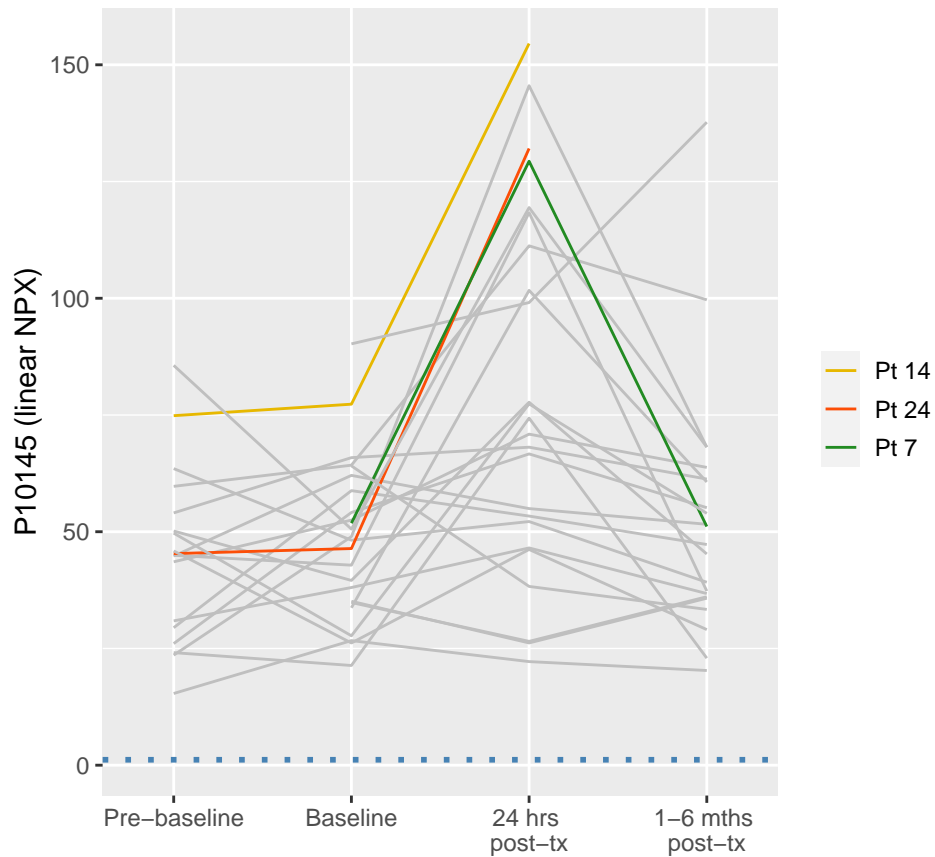

# Uniprot ID: Q07011, analyte:TNFRSF9

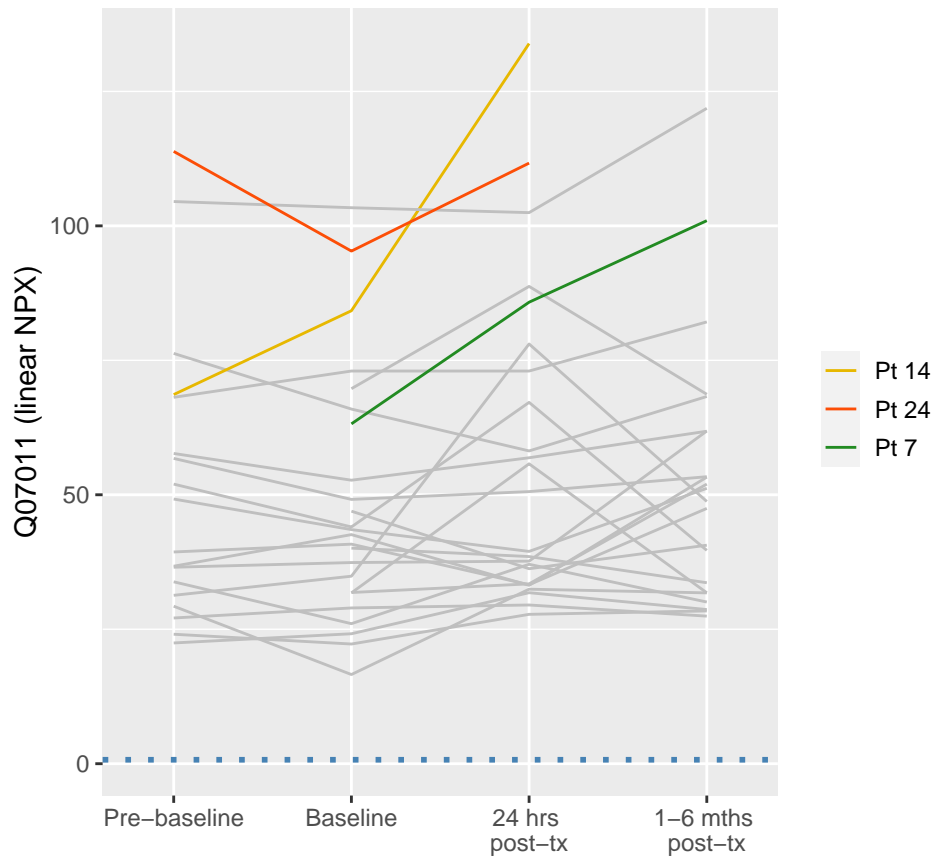

# Uniprot ID: Q02763, analyte:TIE2

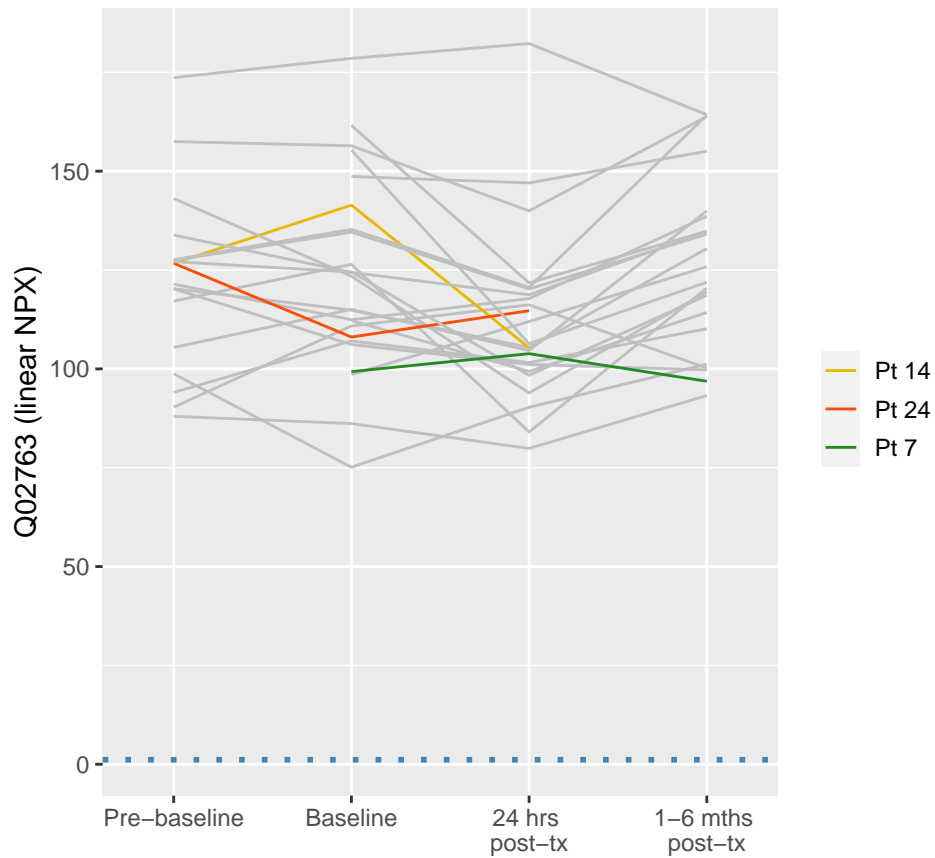

# Uniprot ID: P80098, analyte:MCP-3

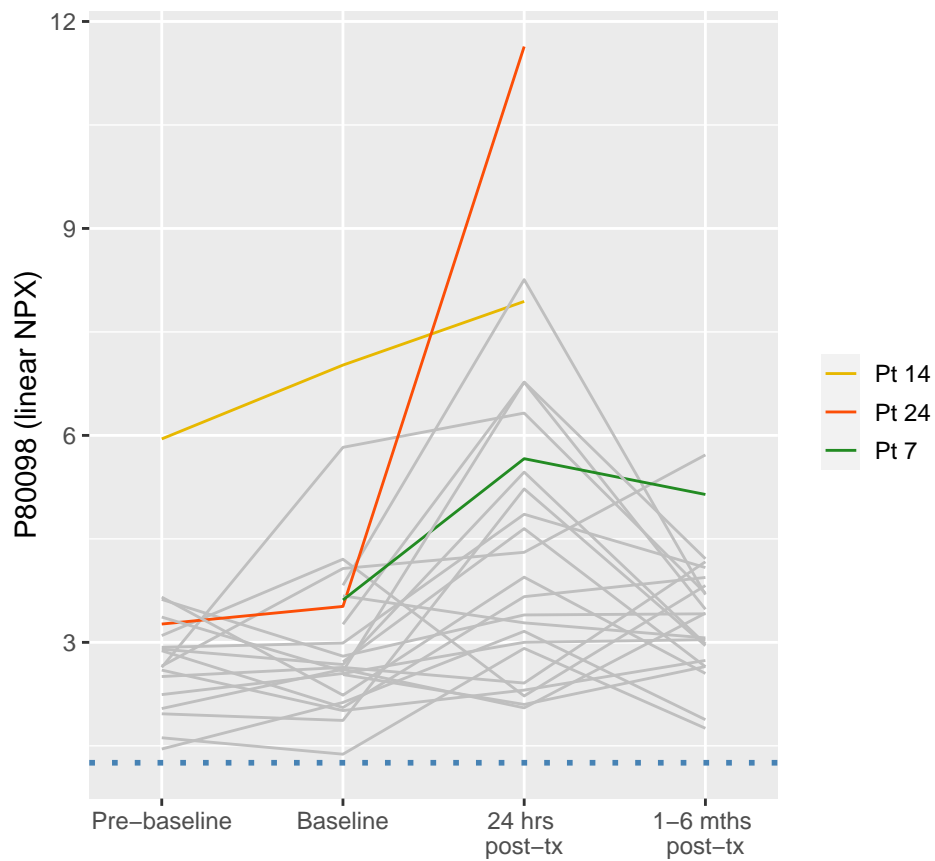

# Uniprot ID: P29965, analyte:CD40-L

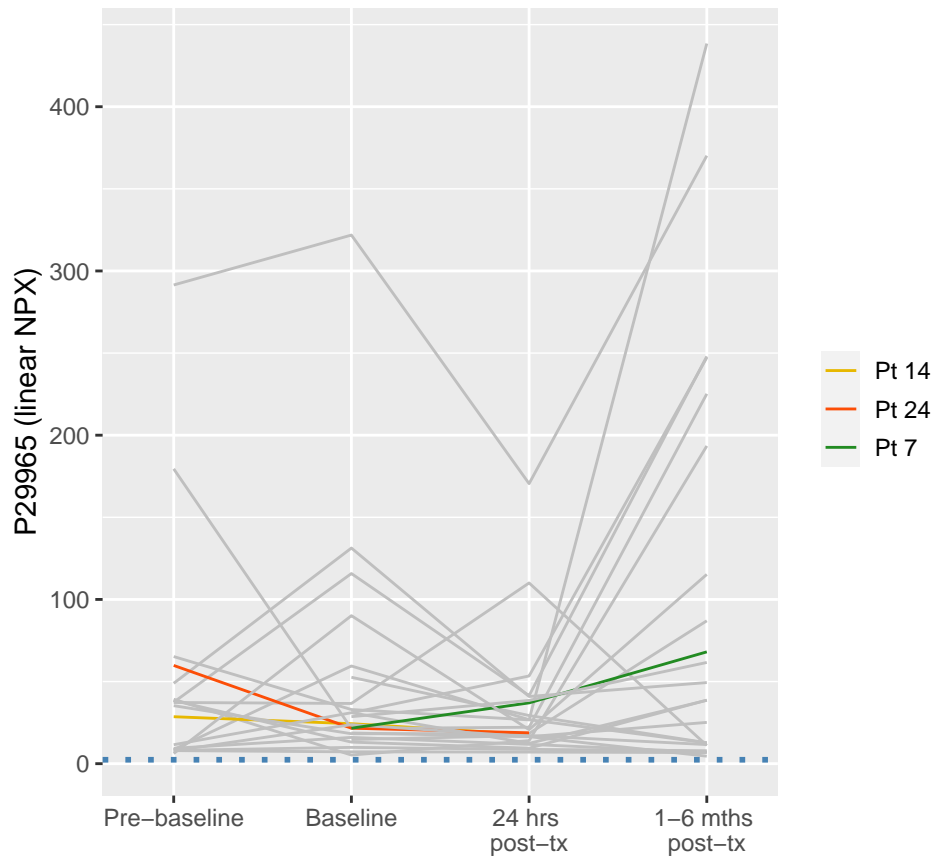

# Uniprot ID: Q9BZW8, analyte:CD244

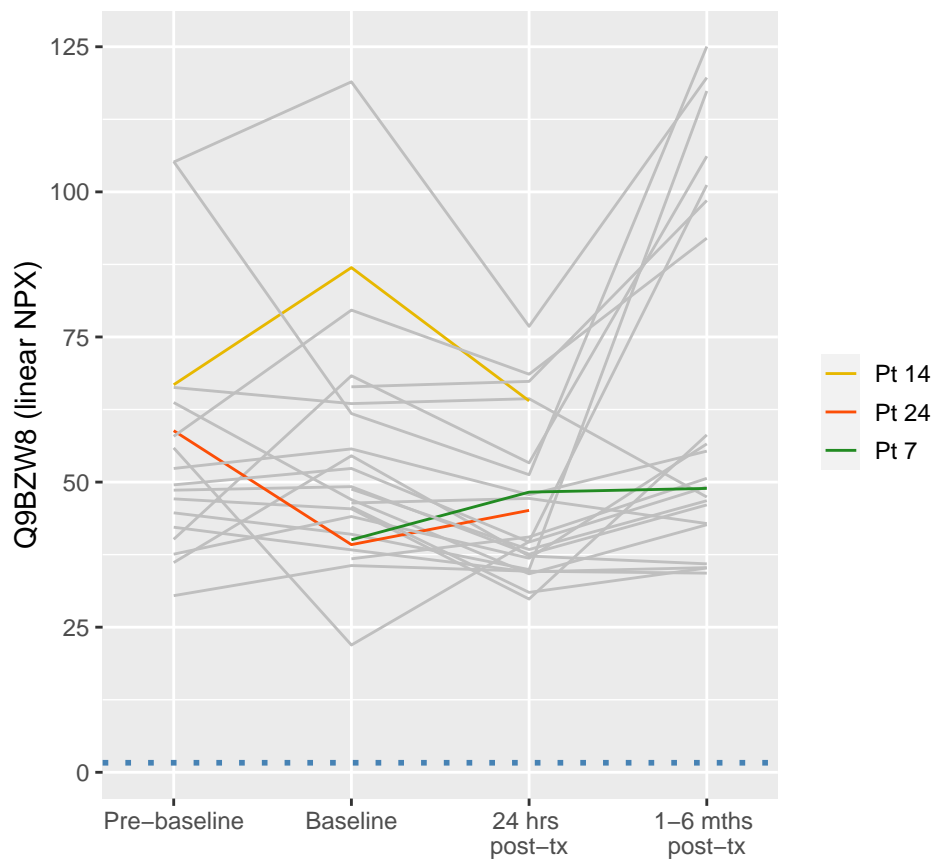

# Uniprot ID: P01133, analyte:EGF

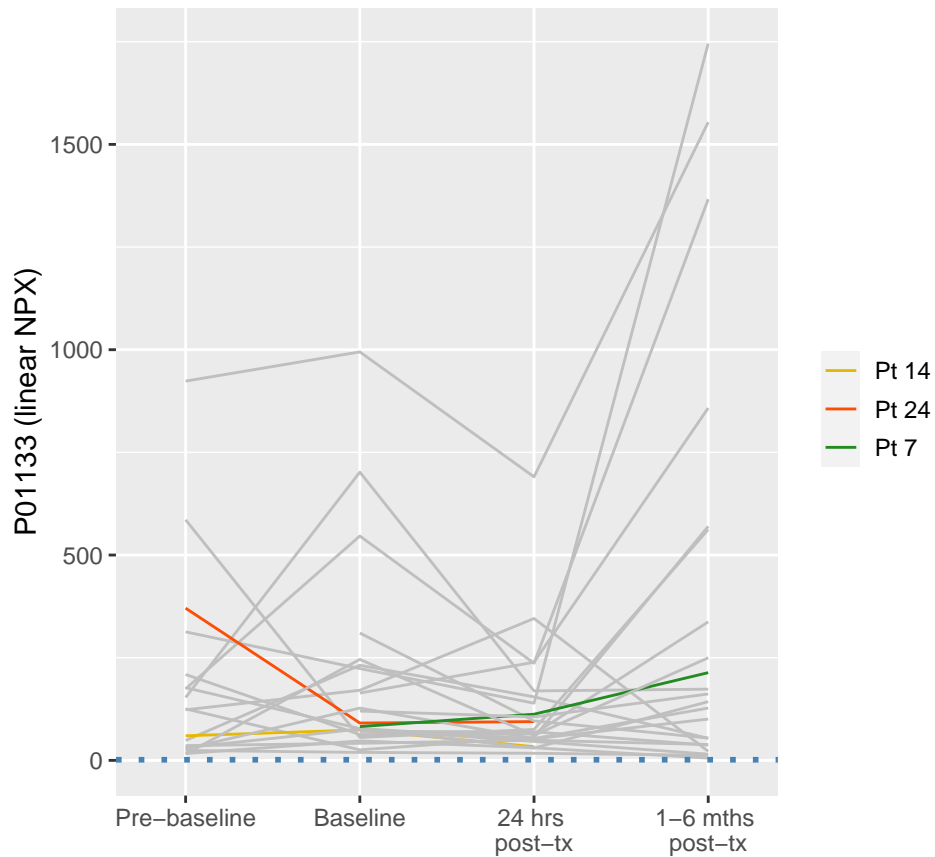



# Uniprot ID: Q15389, analyte:ANGPT1

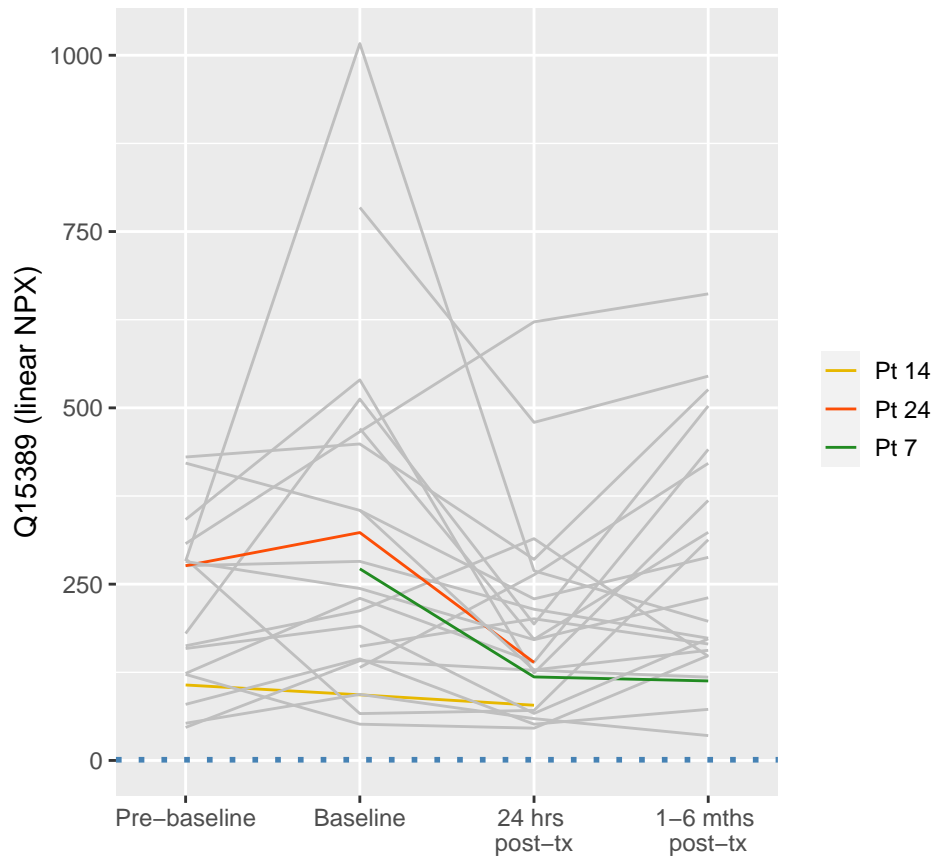

# Uniprot ID: P13232, analyte:IL7

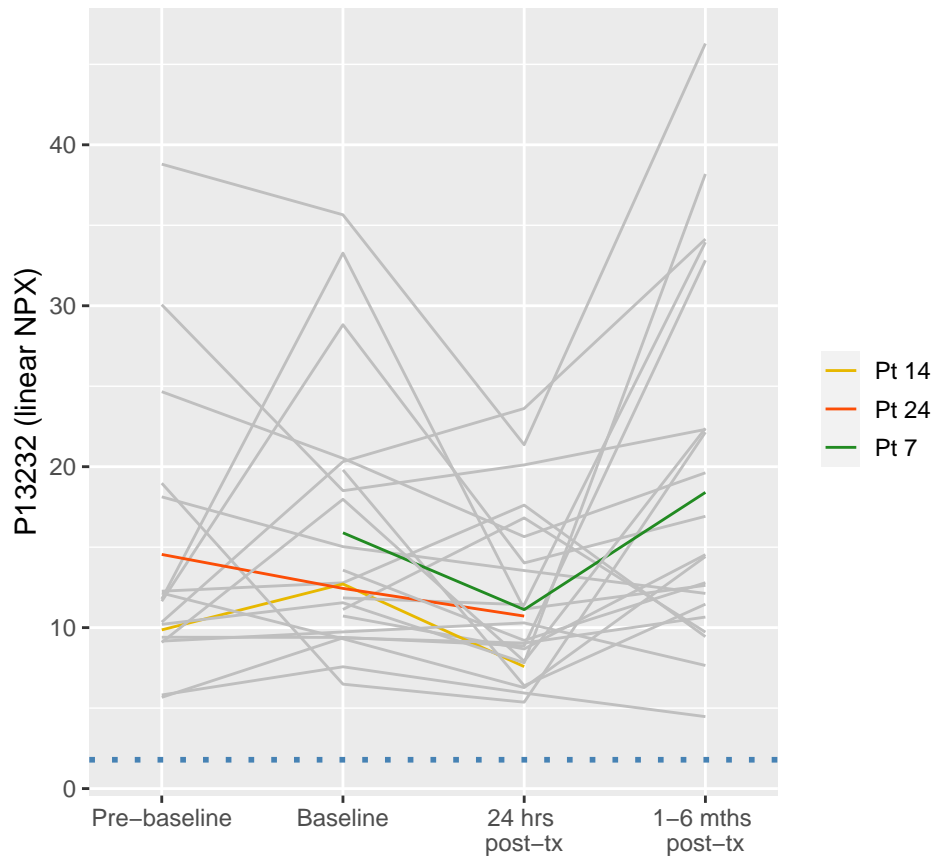

# Uniprot ID: P49763, analyte:PGF

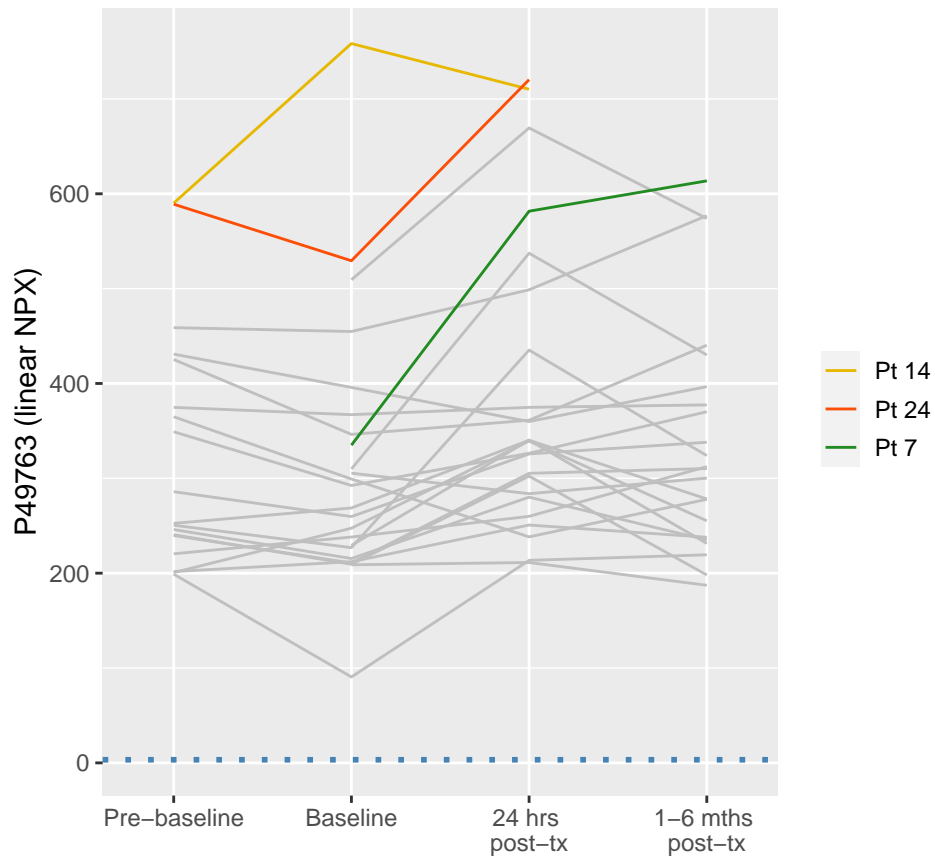

# Uniprot ID: P05231, analyte:IL6

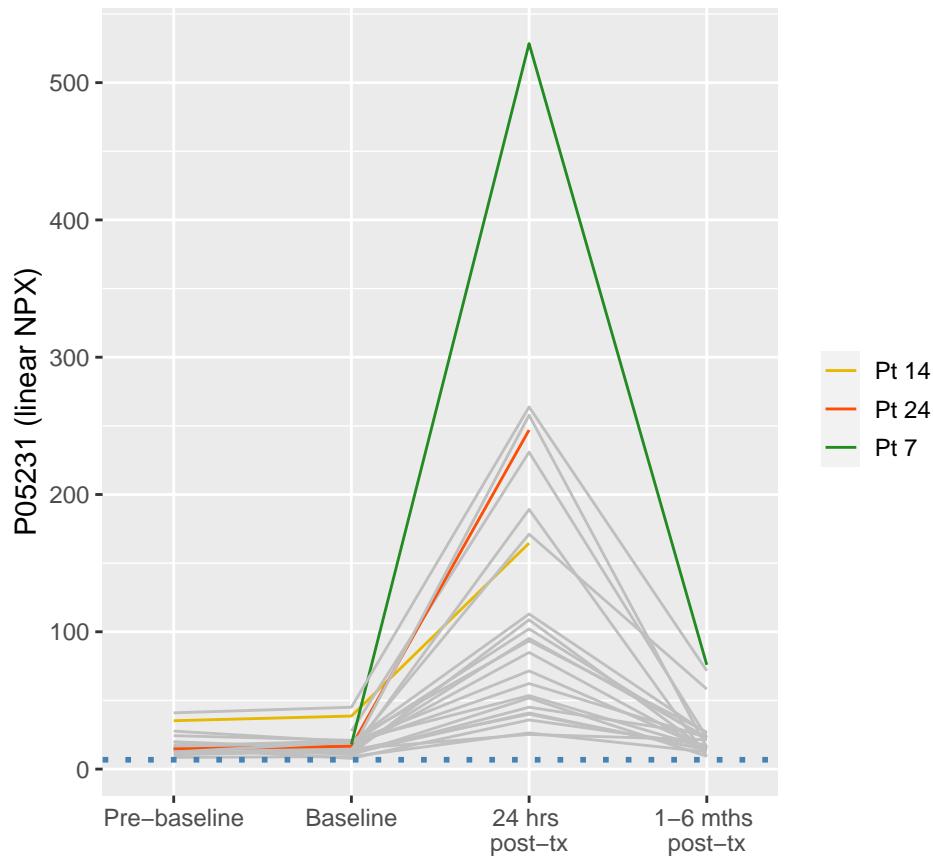

# Uniprot ID: Q9Y653, analyte:ADGRG1

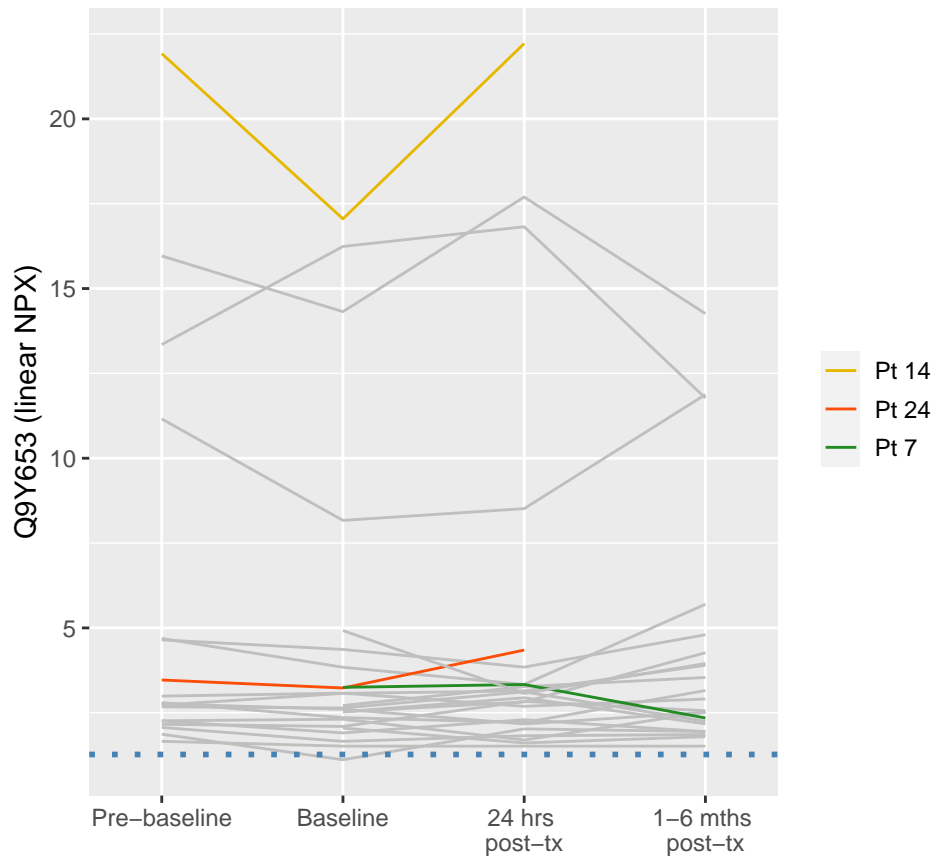

# Uniprot ID: P13500, analyte:MCP-1

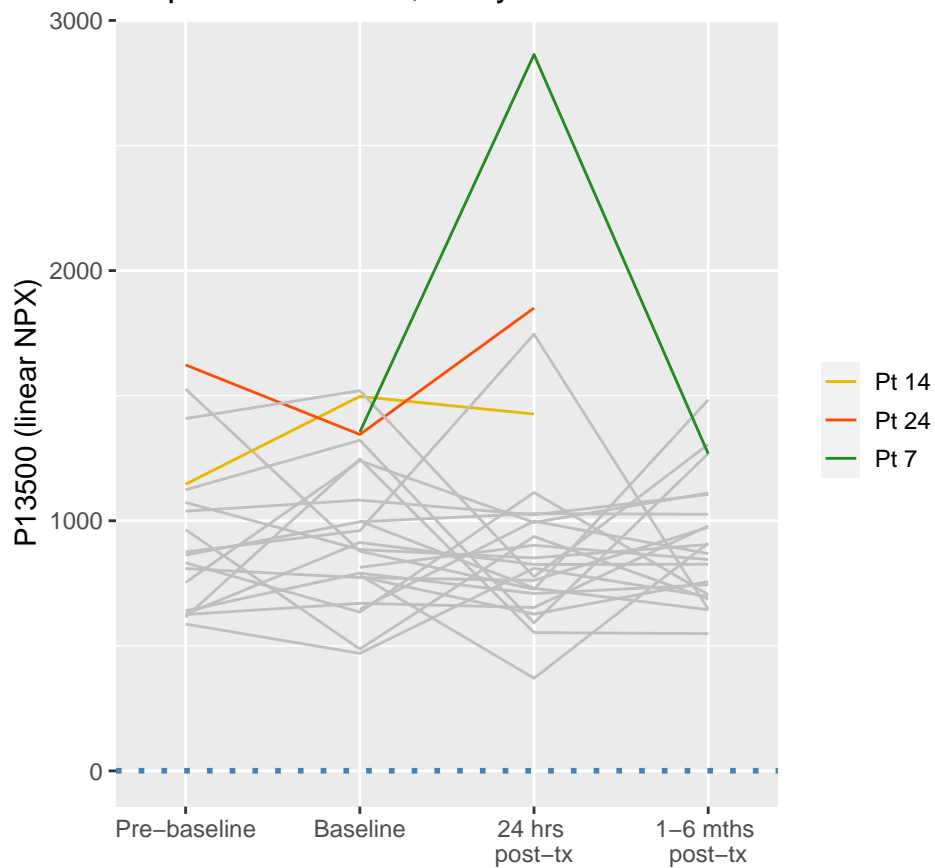

# Uniprot ID: O95727, analyte: CRTAM

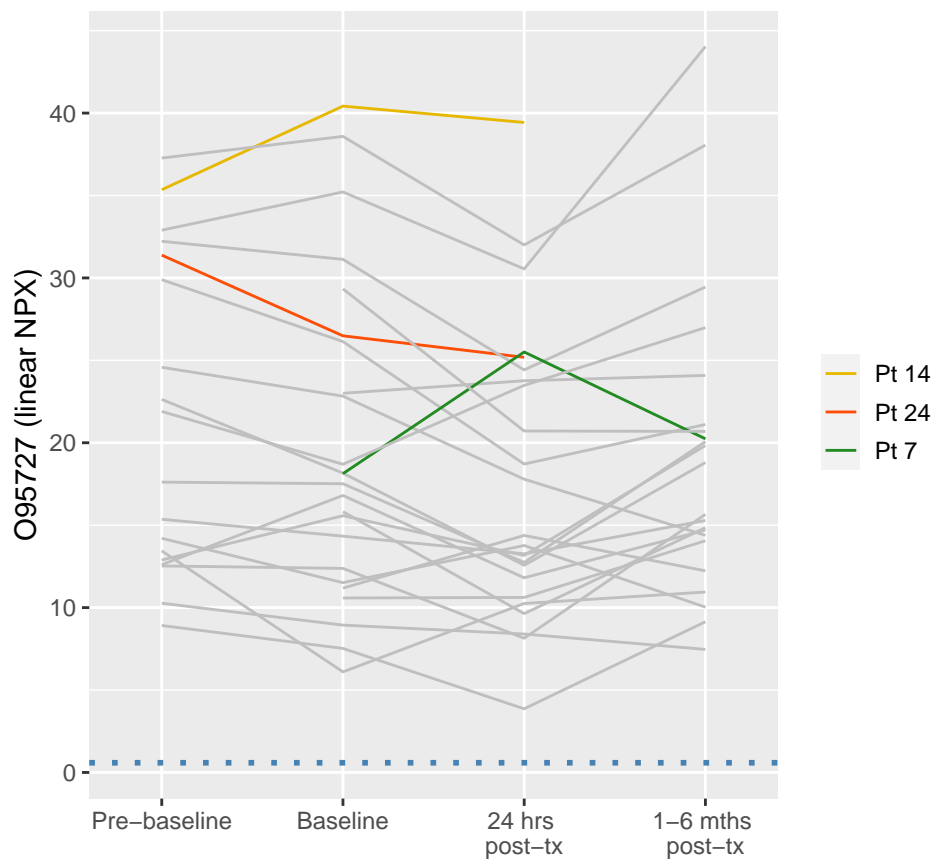

# Uniprot ID: O14625, analyte:CXCL11

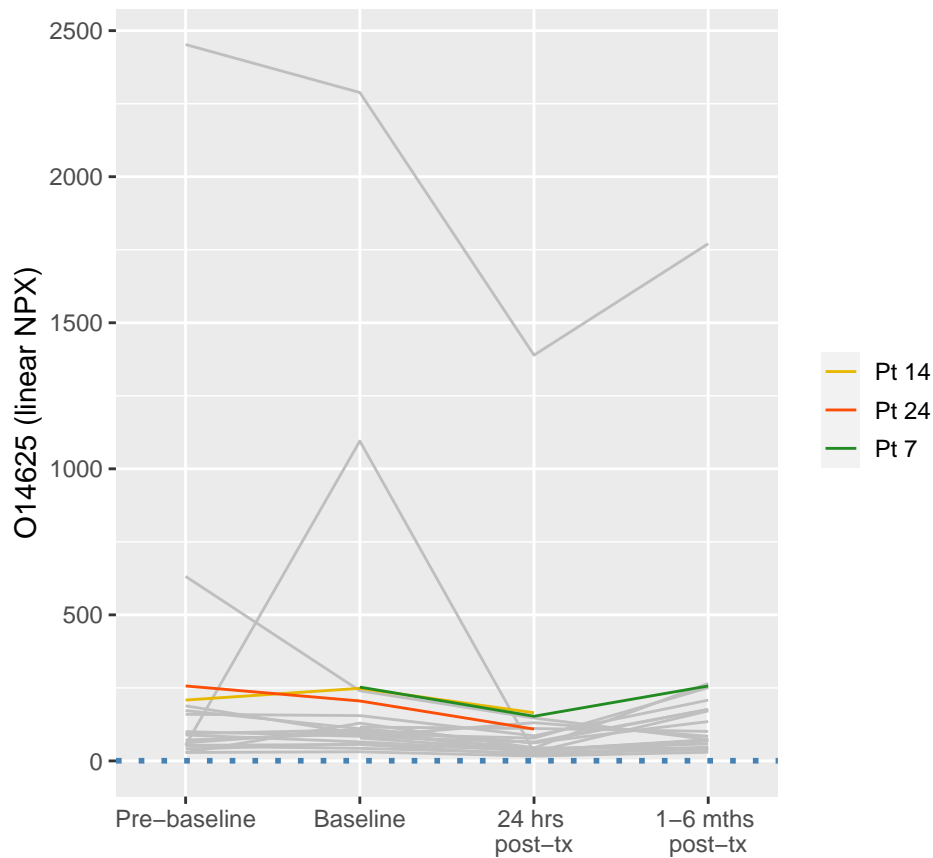



# Uniprot ID: Q99616, analyte:MCP-4

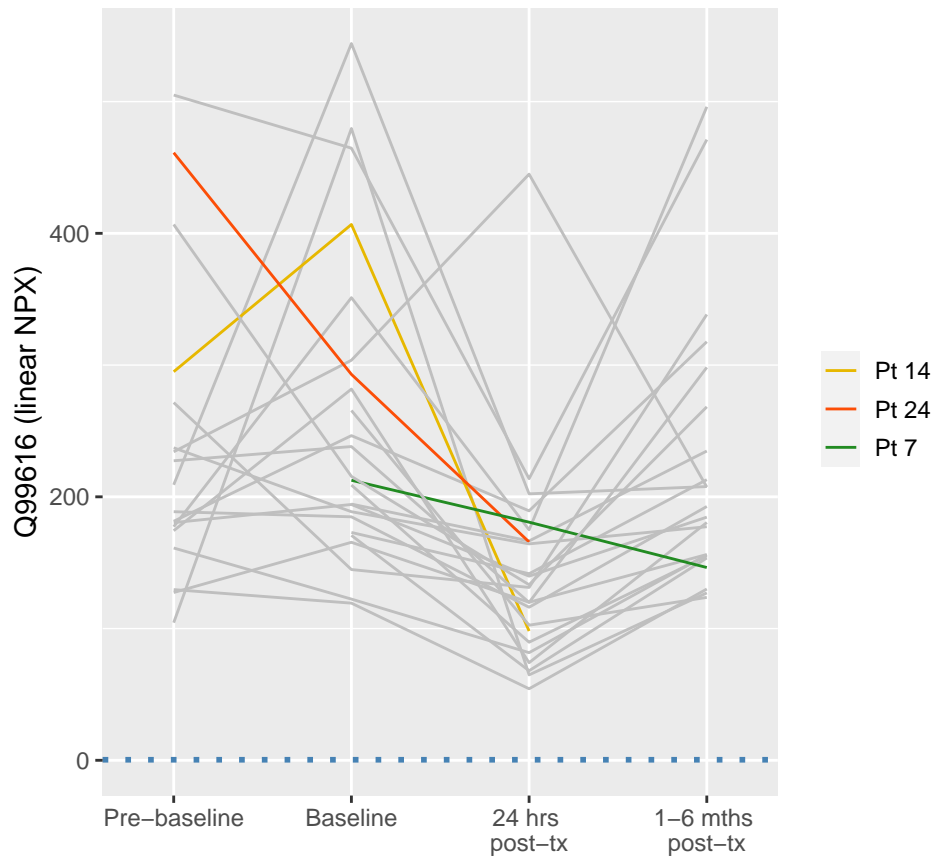

# Uniprot ID: P50591, analyte:TRAIL

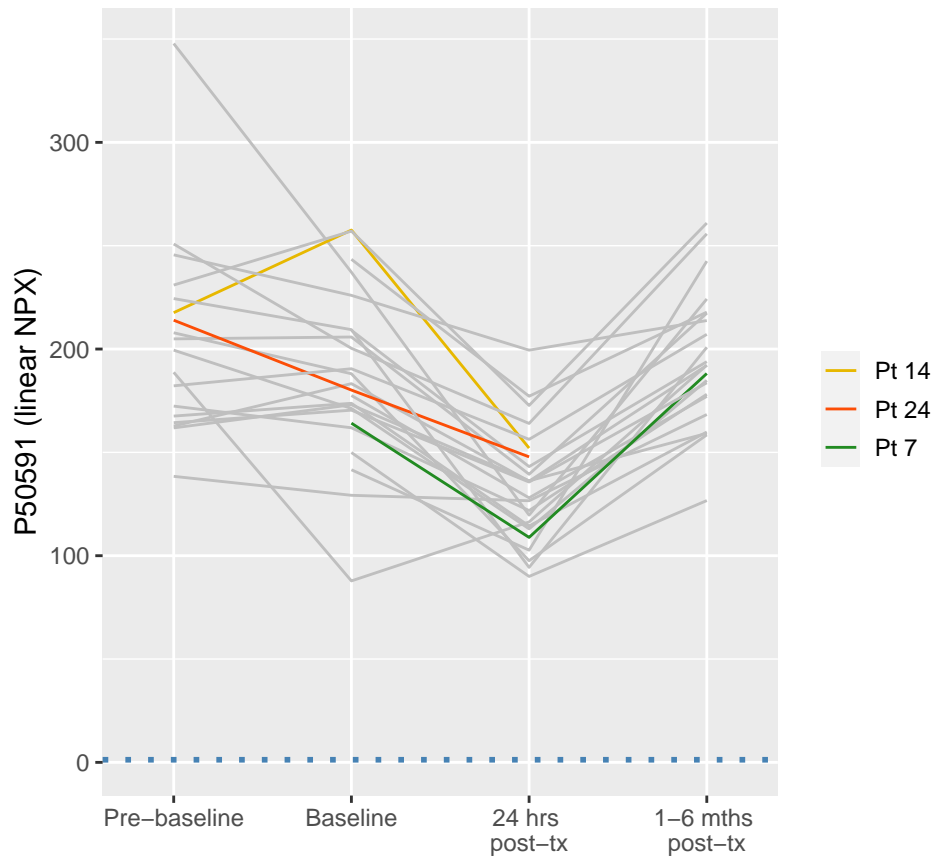

# Uniprot ID: P09038, analyte:FGF2

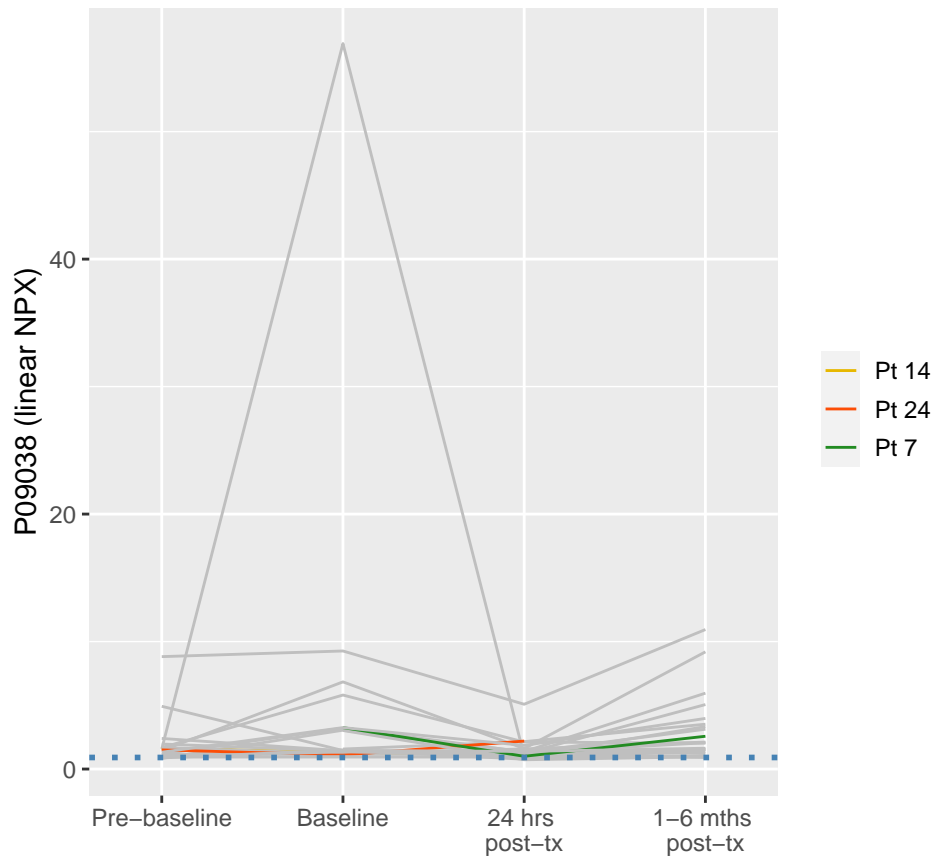

# Uniprot ID: Q07325, analyte:CXCL9

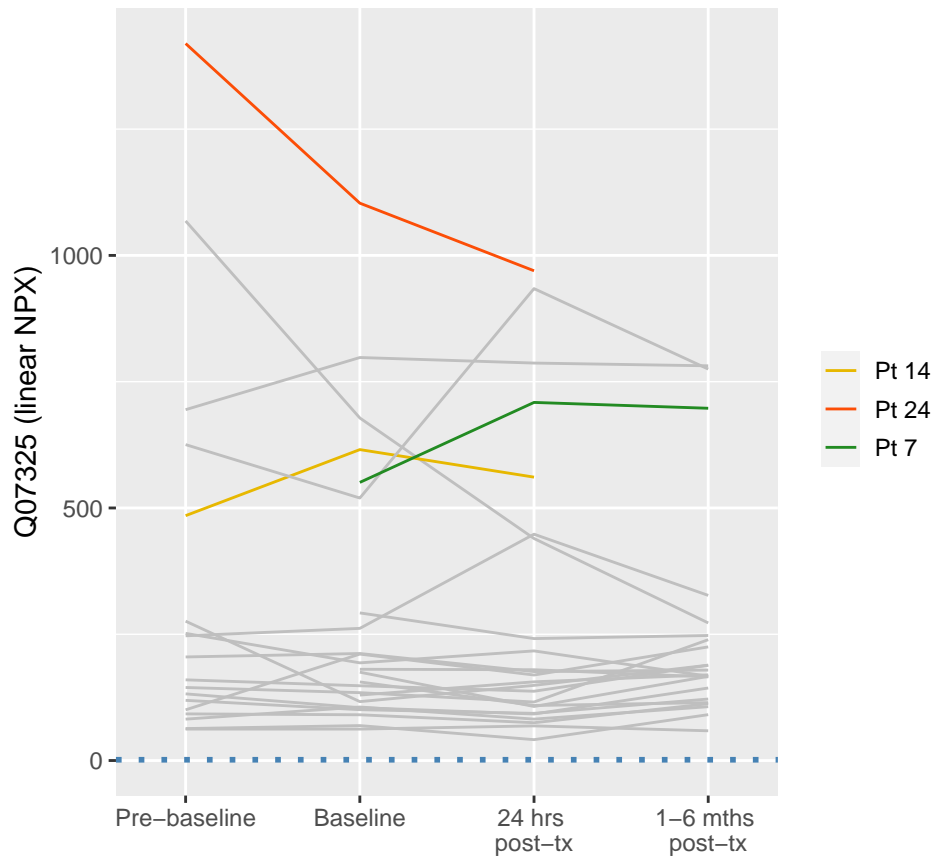

# Uniprot ID: P01732, analyte:CD8A

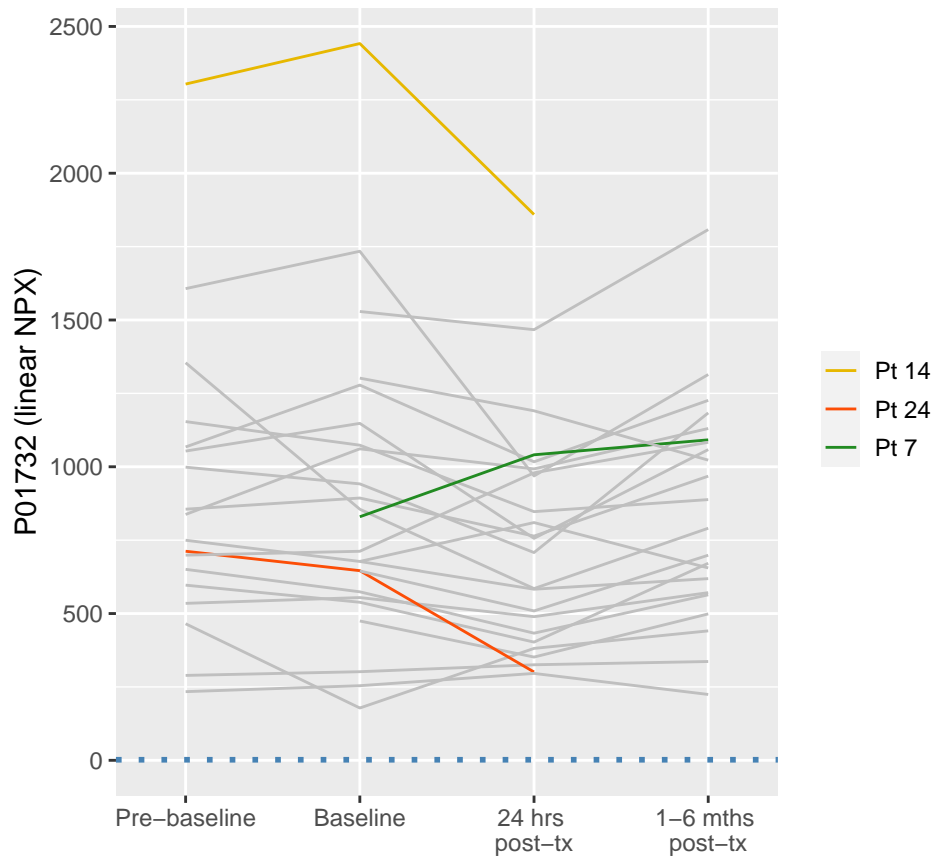

# Uniprot ID: Q16790, analyte:CAIX

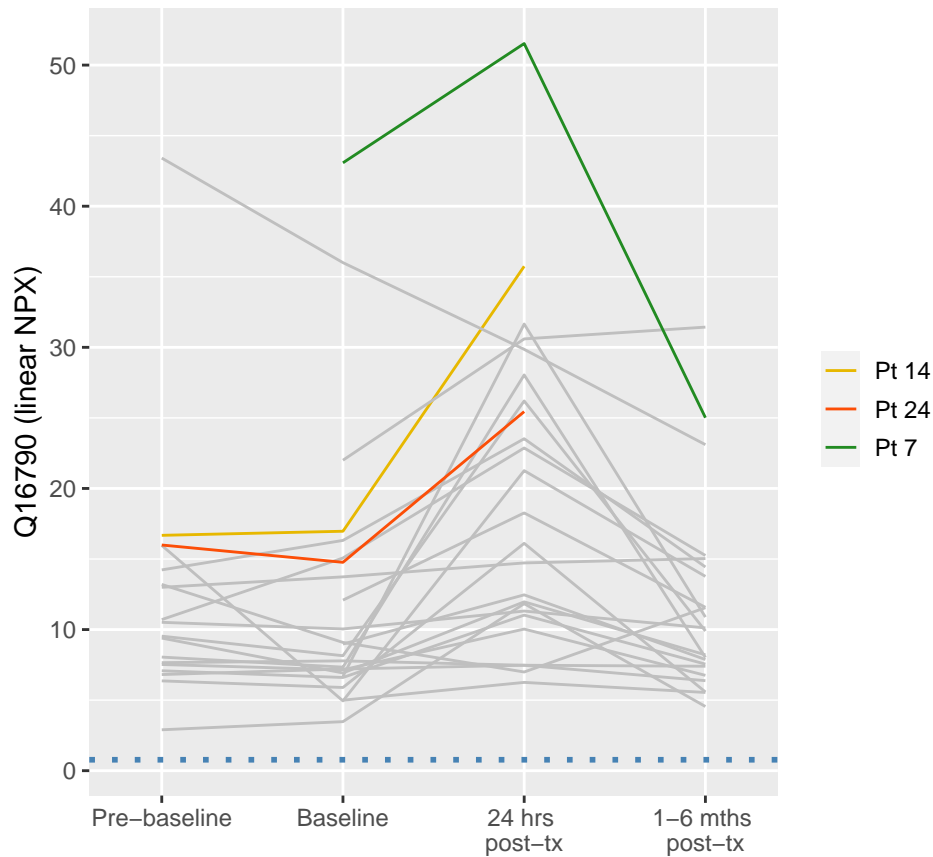

# Uniprot ID: Q8WXI7, analyte:MUC-16

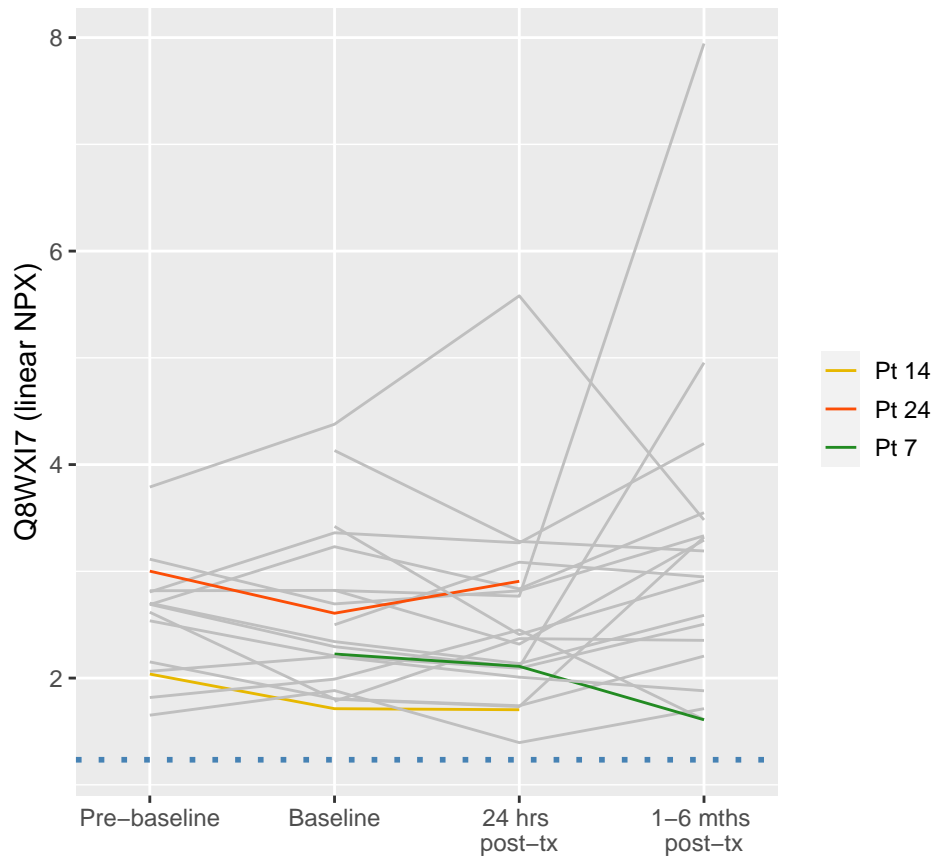

# Uniprot ID: P00813, analyte:ADA

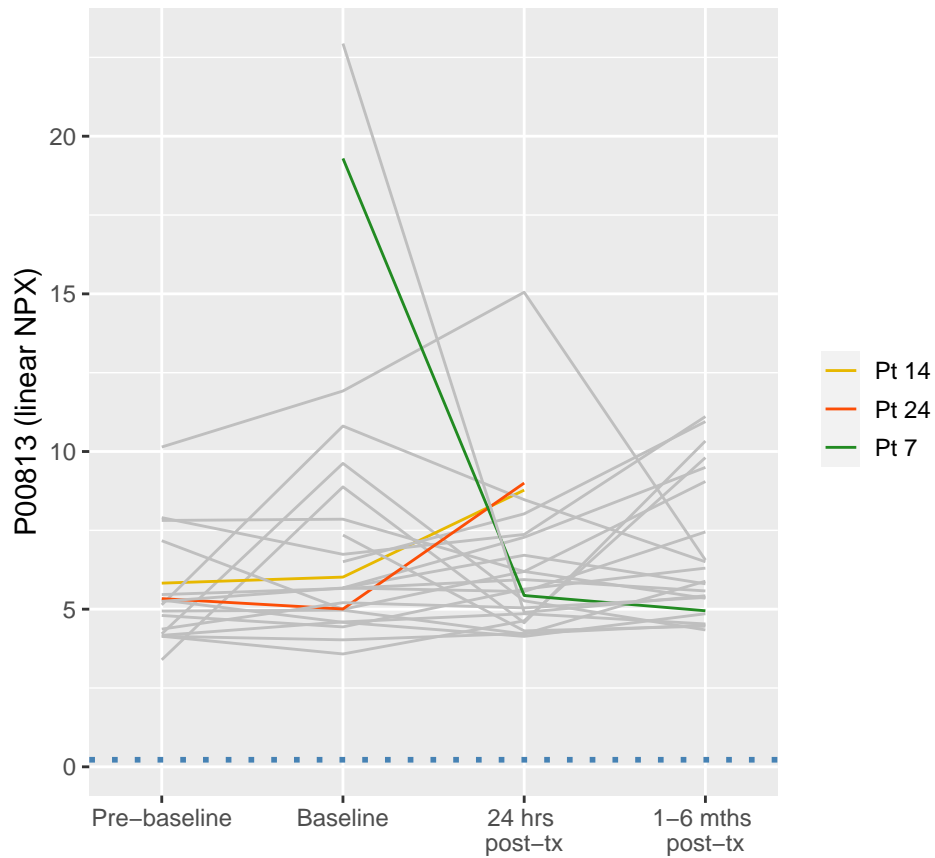



# Uniprot ID: P01730, analyte:CD4

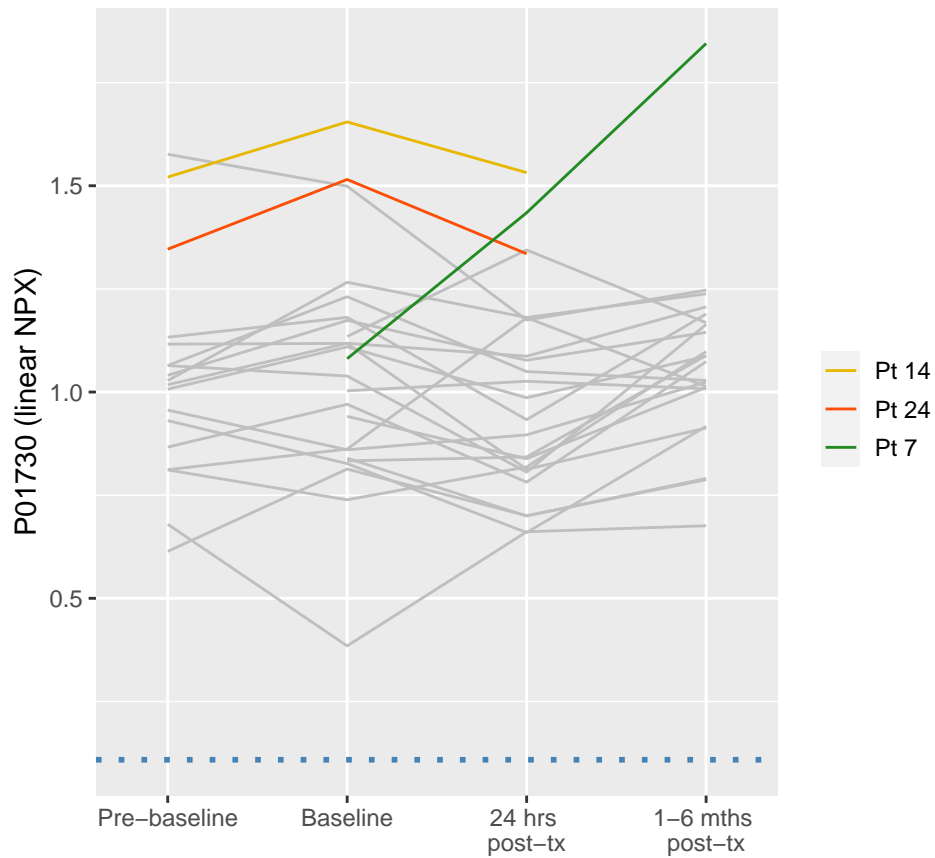

# Uniprot ID: P29474, analyte:NOS3

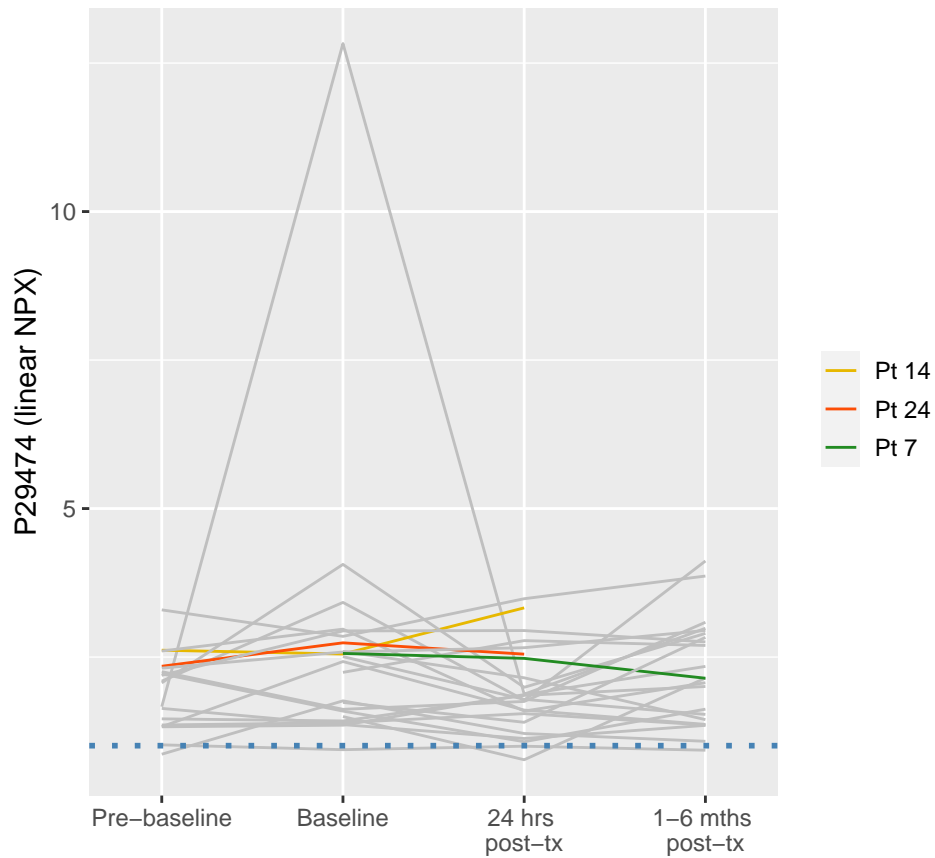

# Uniprot ID: O00182, analyte:Gal-9

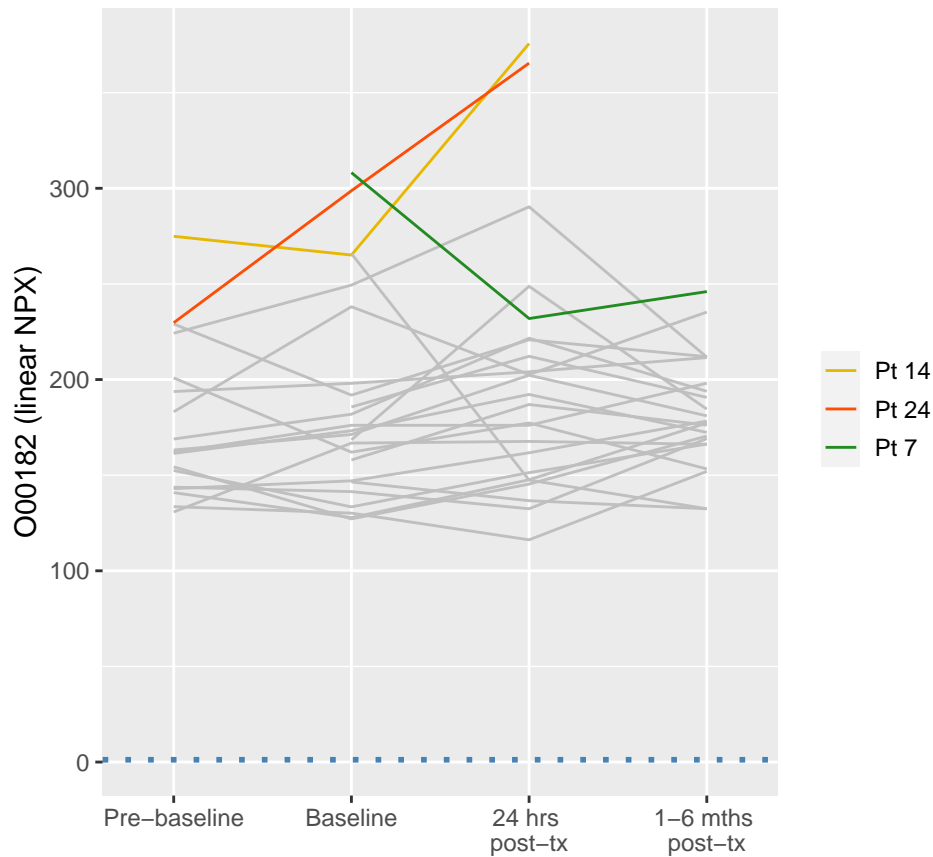

# Uniprot ID: P35968, analyte:VEGFR-2

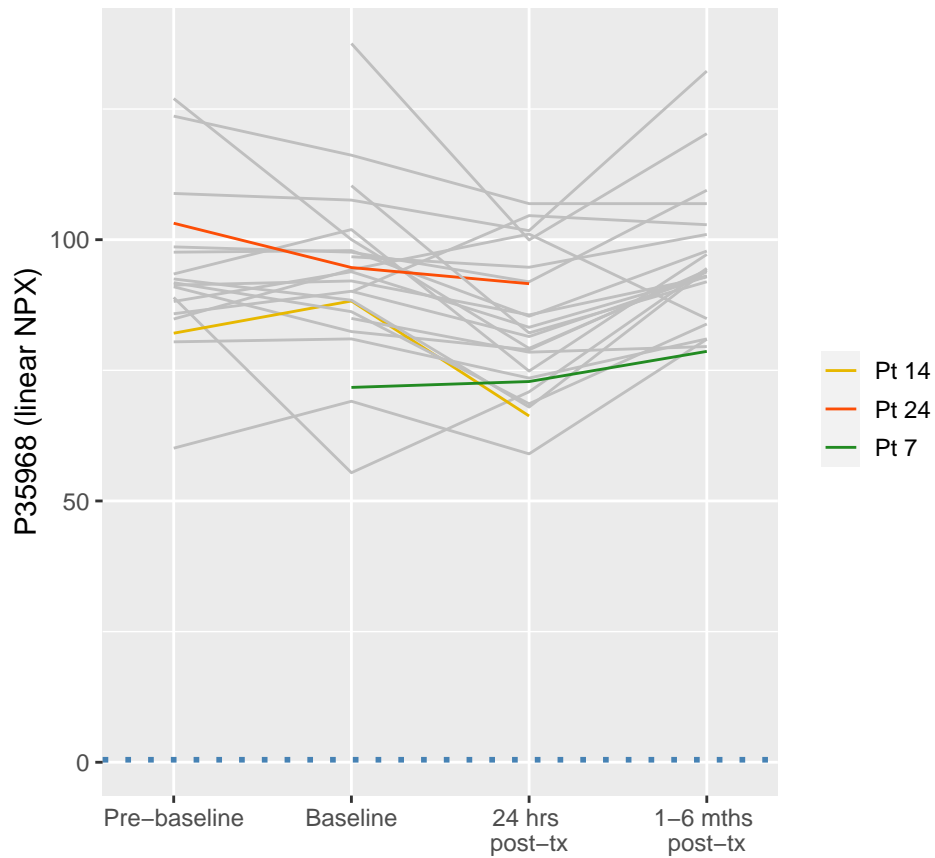

# Uniprot ID: P25942, analyte:CD40

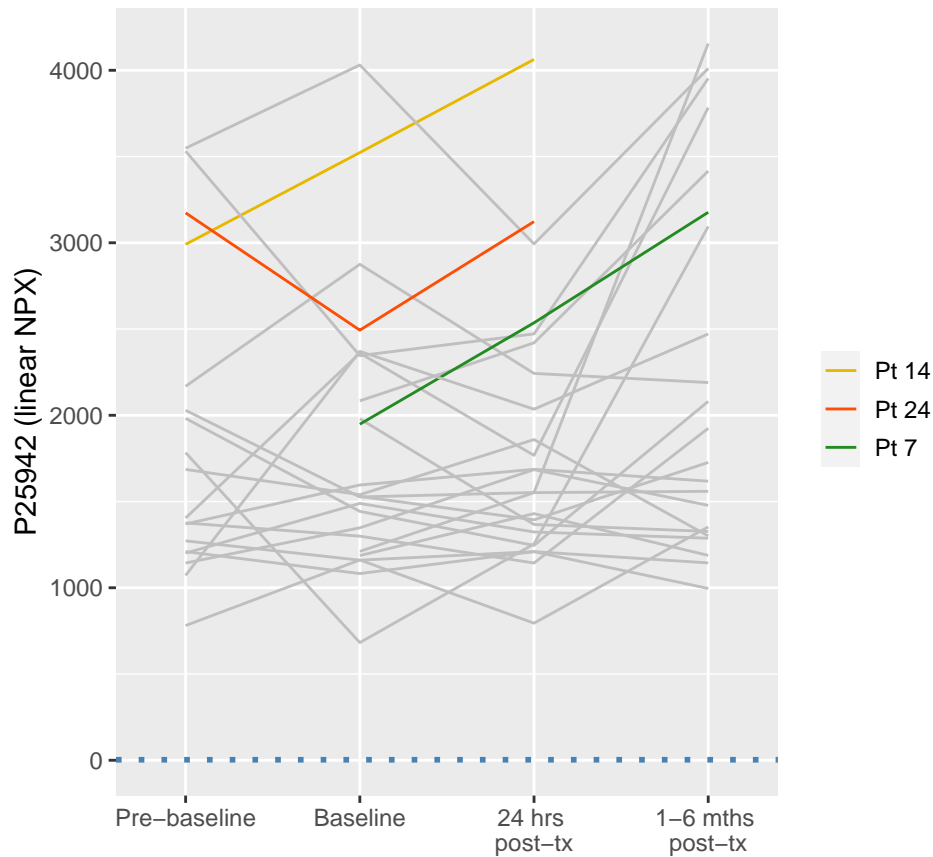

# Uniprot ID: Q14116, analyte:IL18

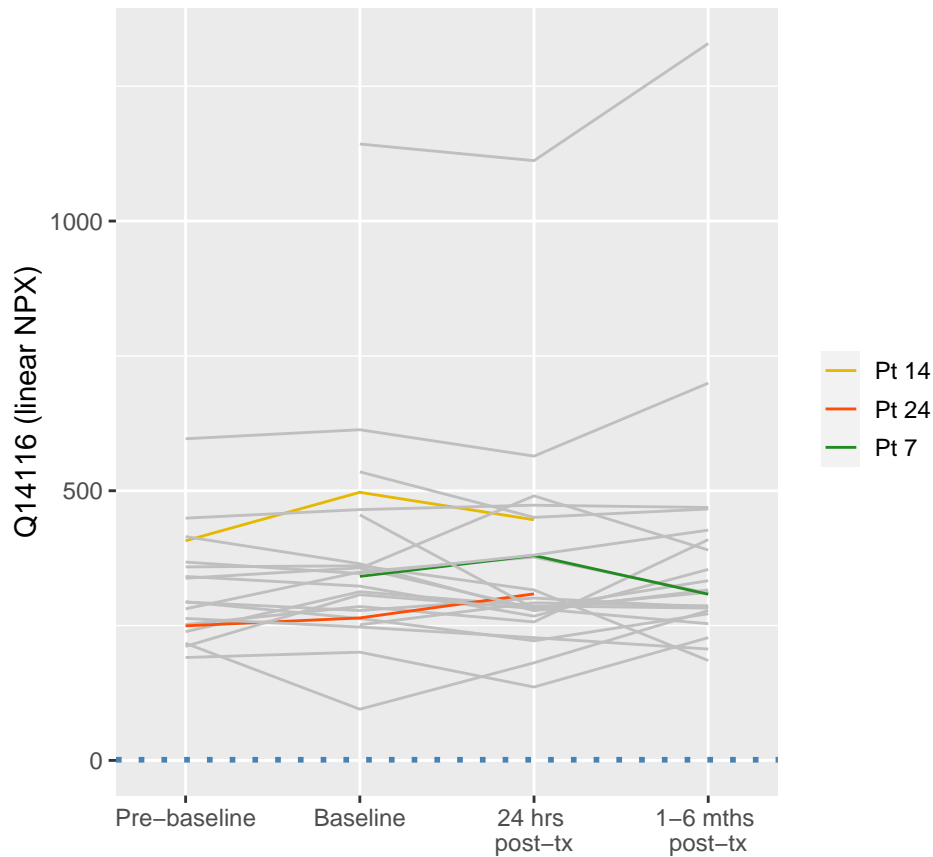

# Uniprot ID: P20718, analyte:GZMH

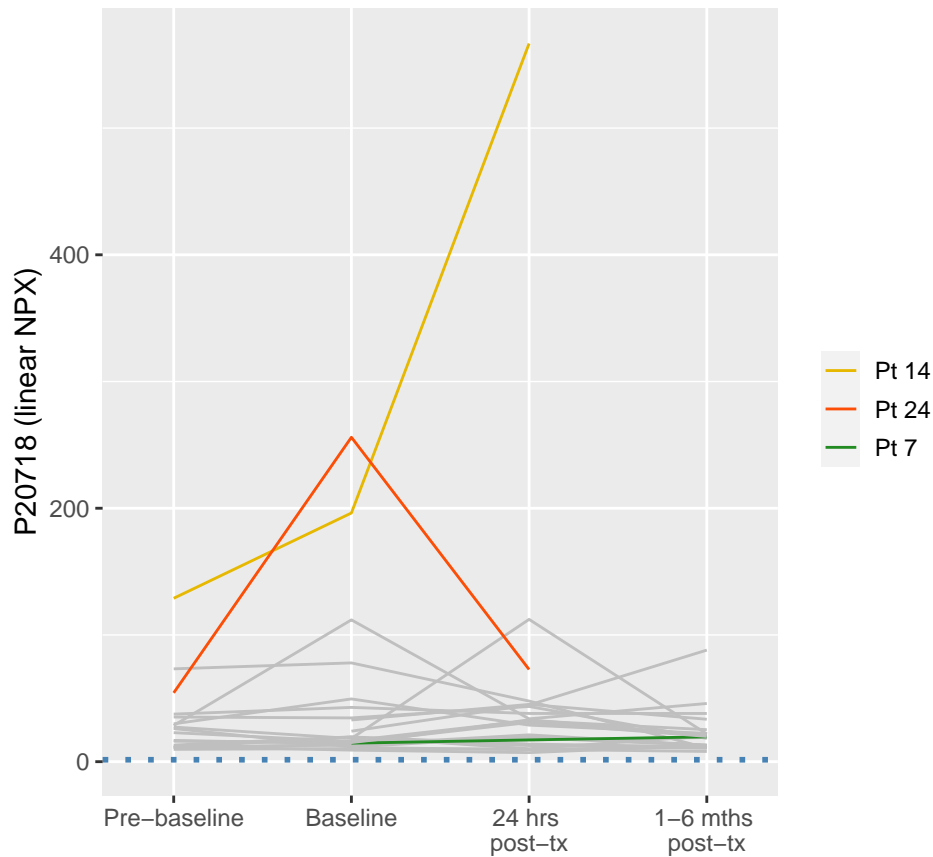

# Uniprot ID: P43629, analyte:KIR3DL1

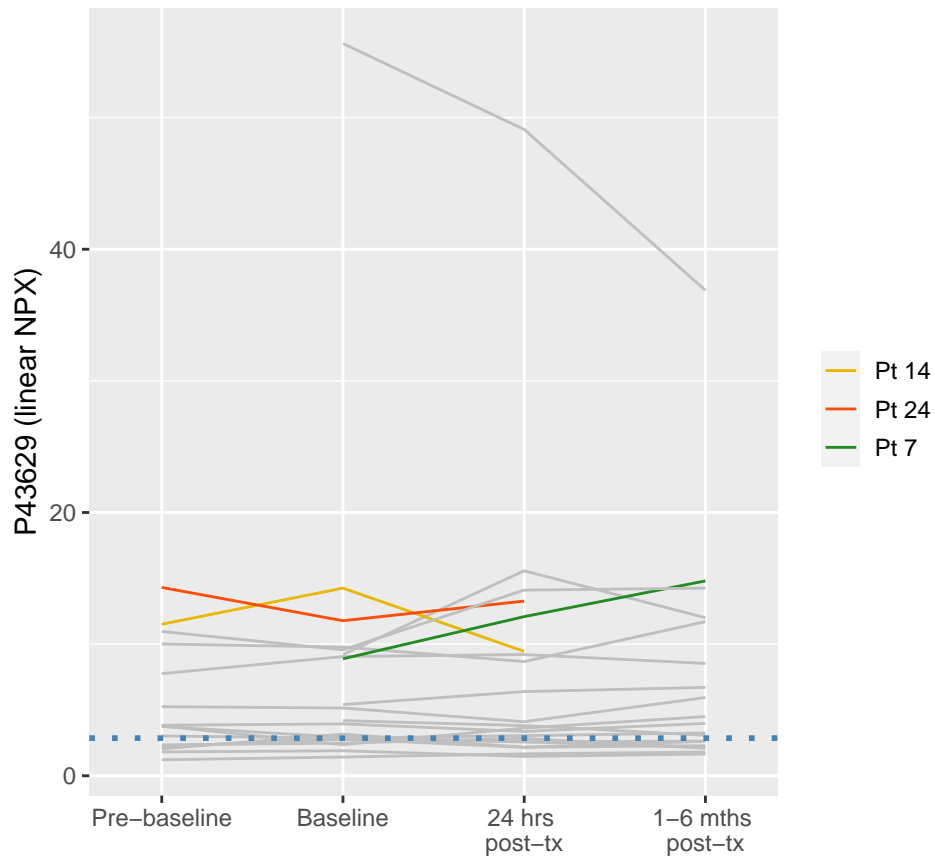



# Uniprot ID: P01137, analyte:LAP TGF-beta-1

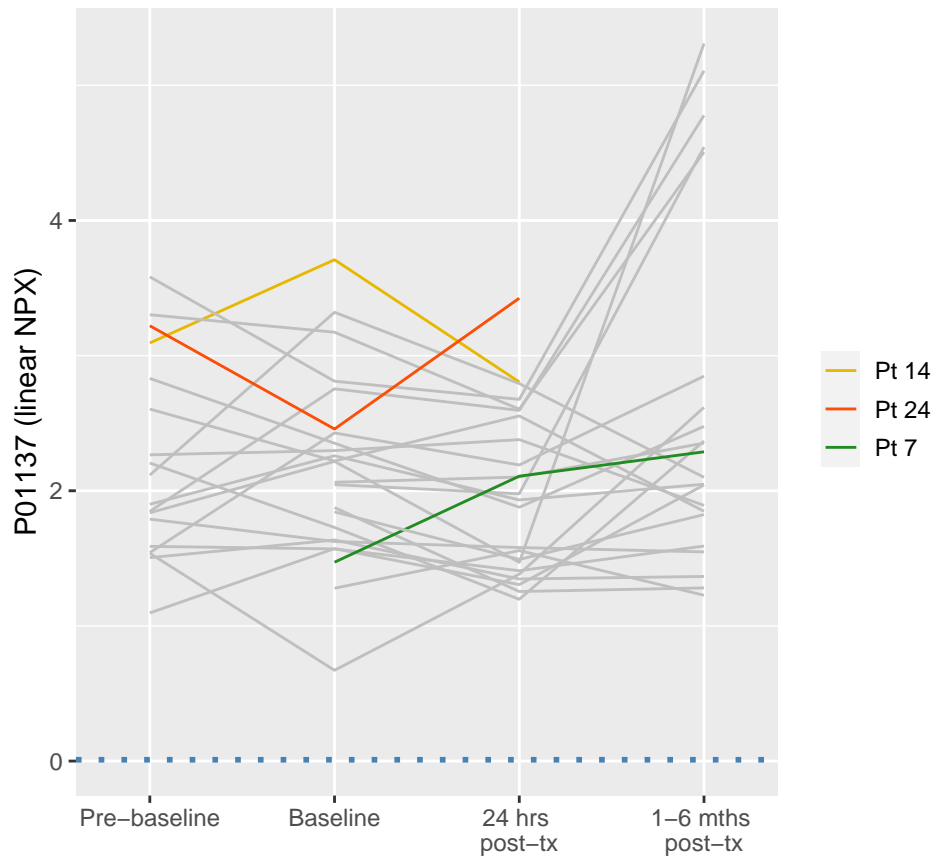

# Uniprot ID: P09341, analyte:CXCL1

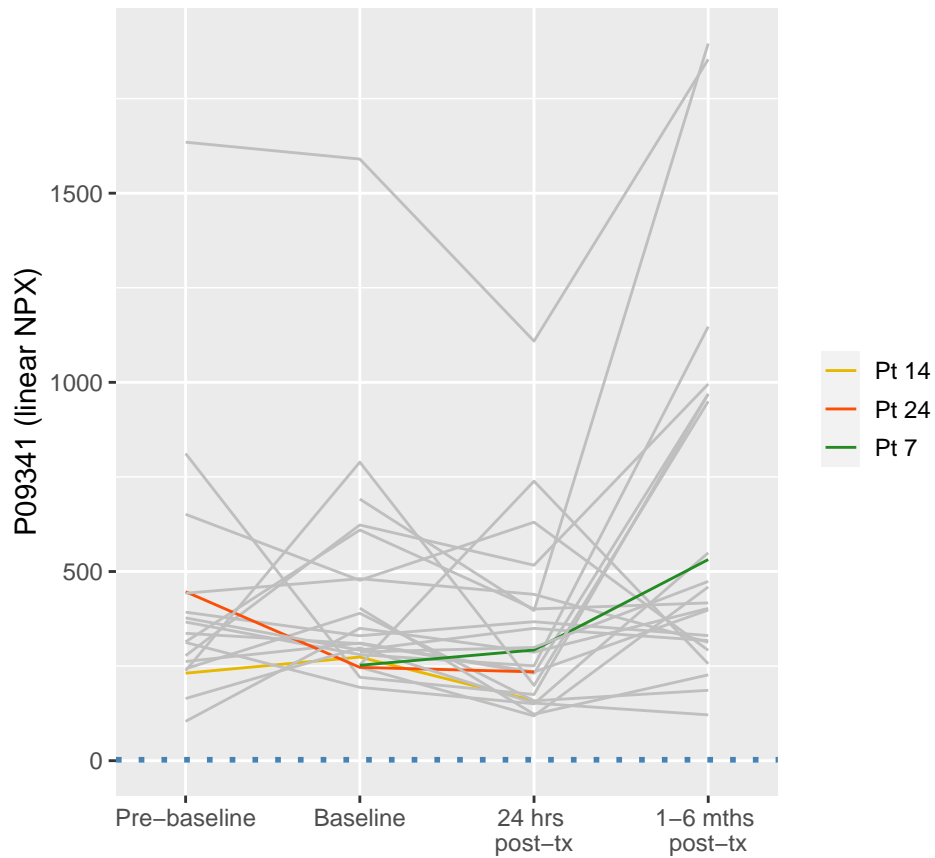

# Uniprot ID: O43557, analyte:TNFSF14

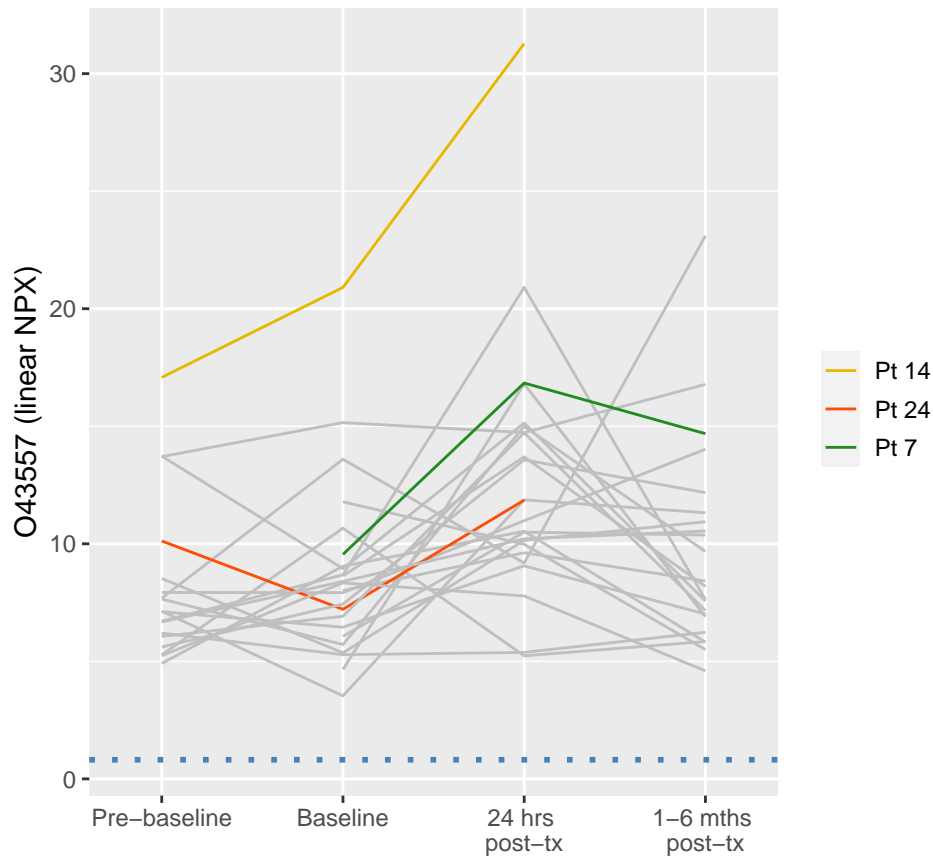

# Uniprot ID: O43508, analyte:TWEAK

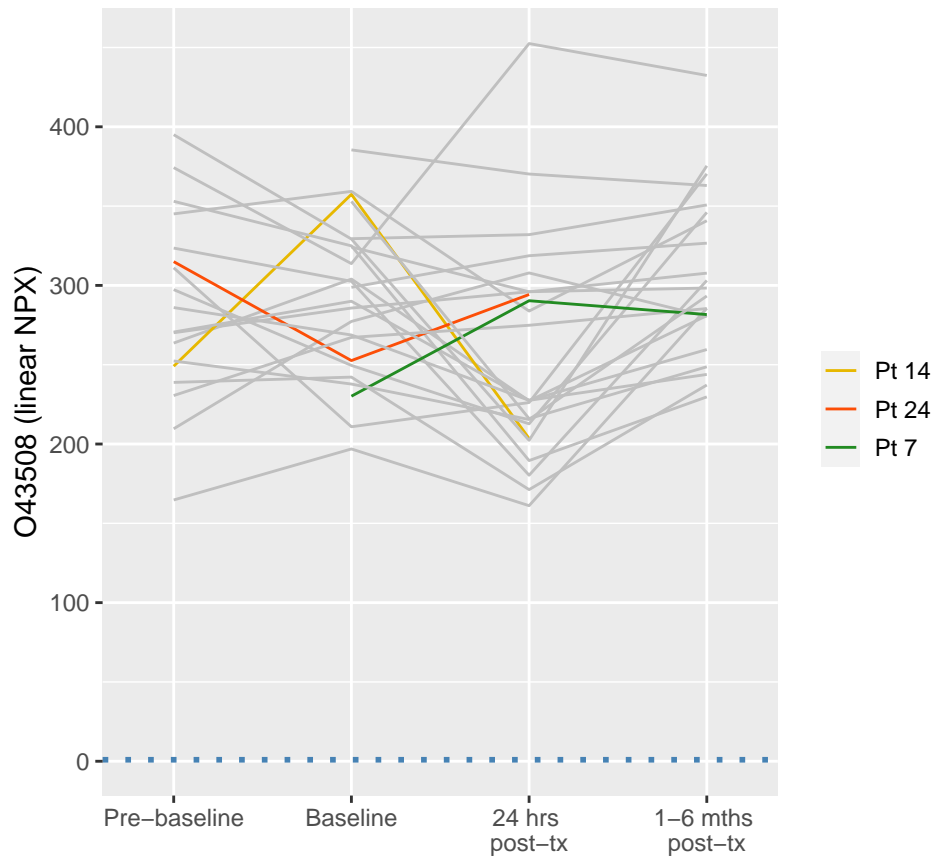

# Uniprot ID: P01127, analyte:PDGF subunit B

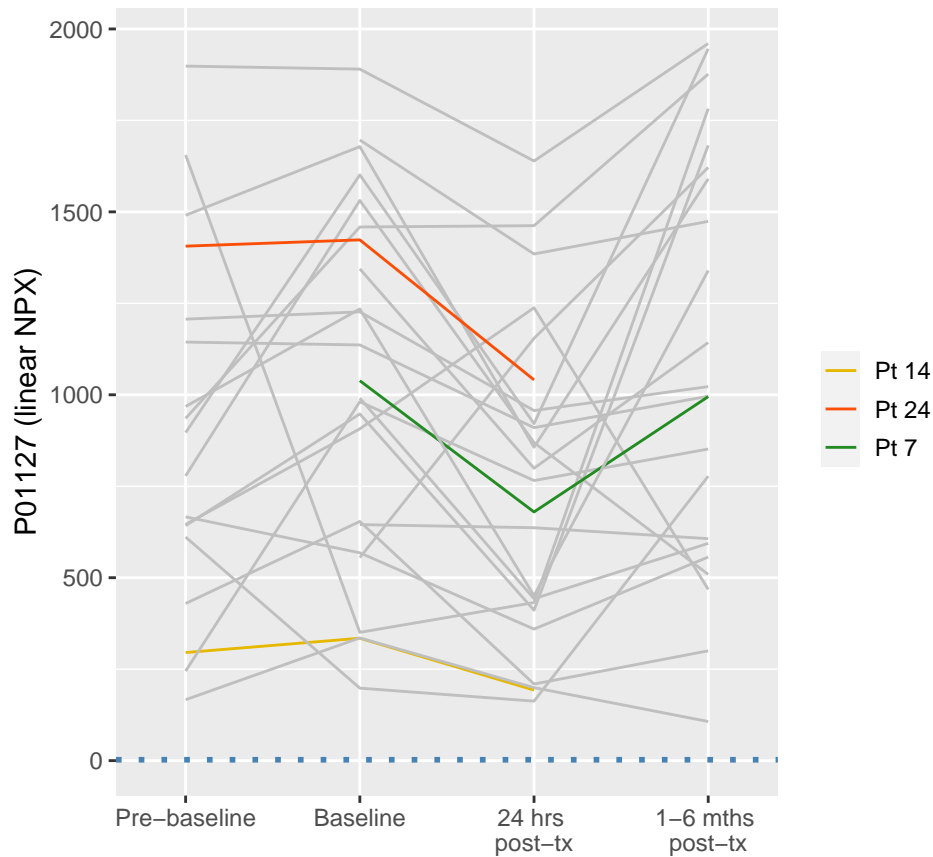

# Uniprot ID: Q15116, analyte:PDCD1

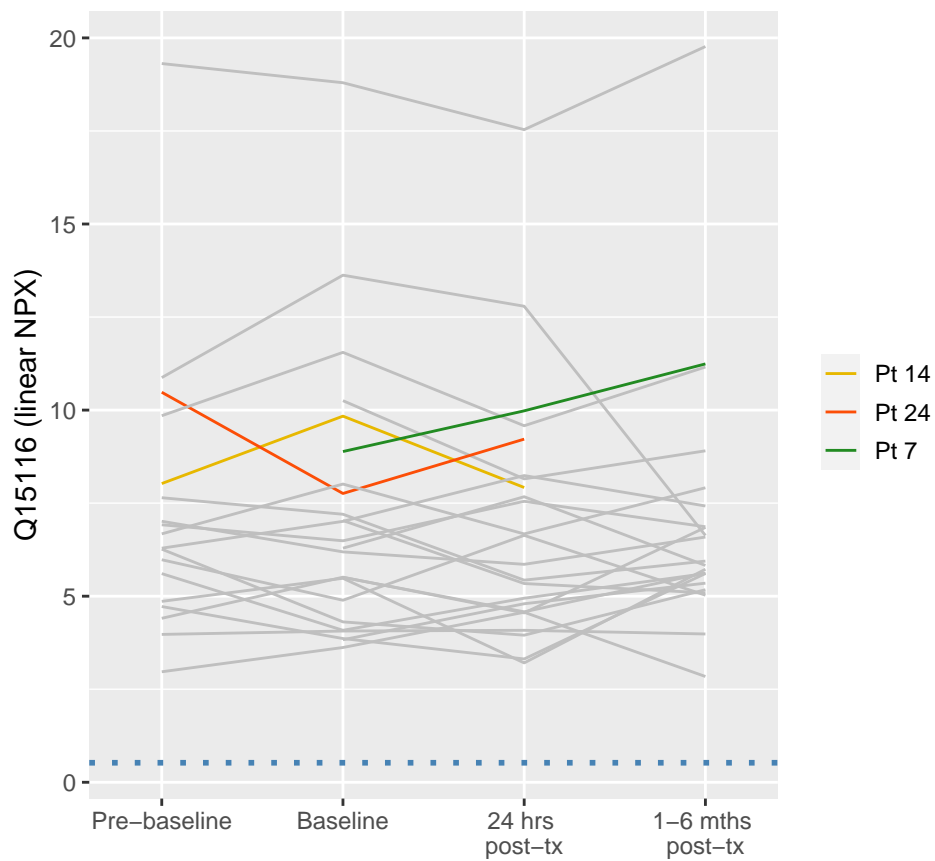

# Uniprot ID: P48023, analyte:FASLG

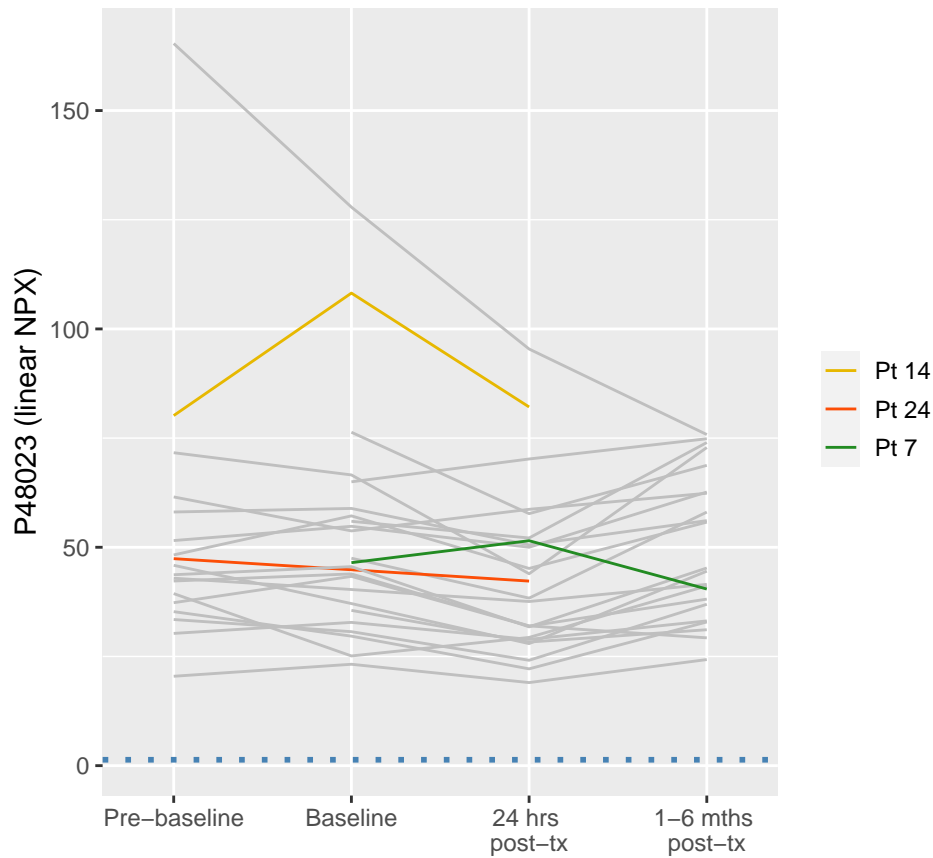

# Uniprot ID: Q99731, analyte:CCL19

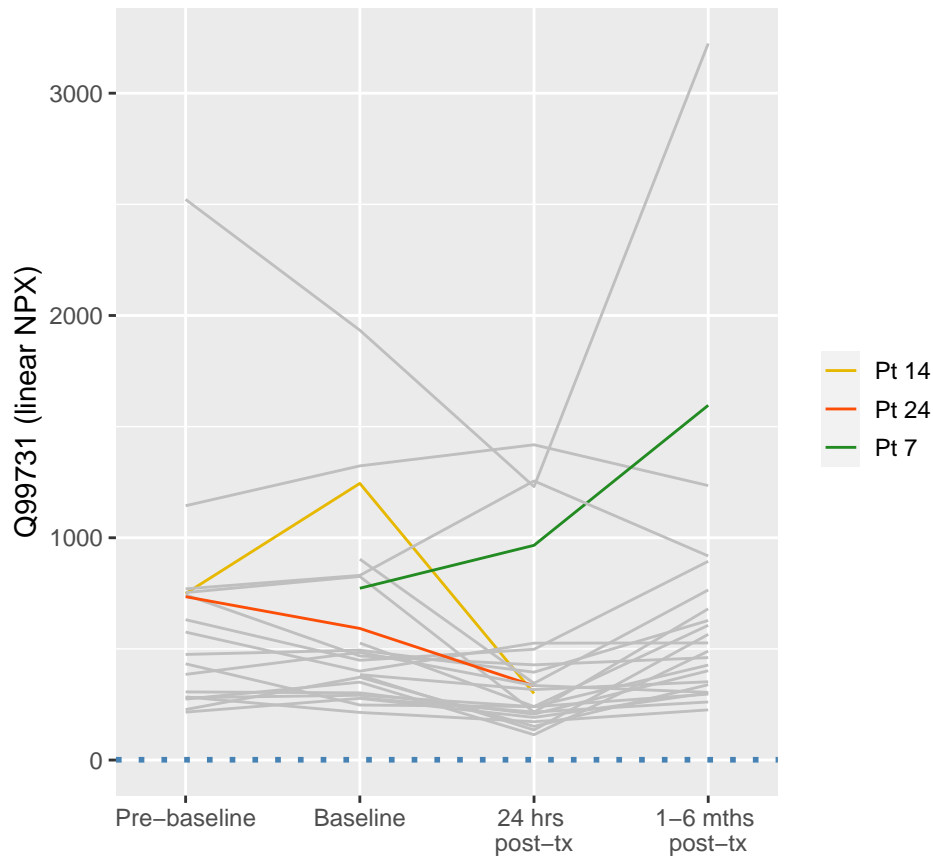



# Uniprot ID: P80075, analyte:MCP-2

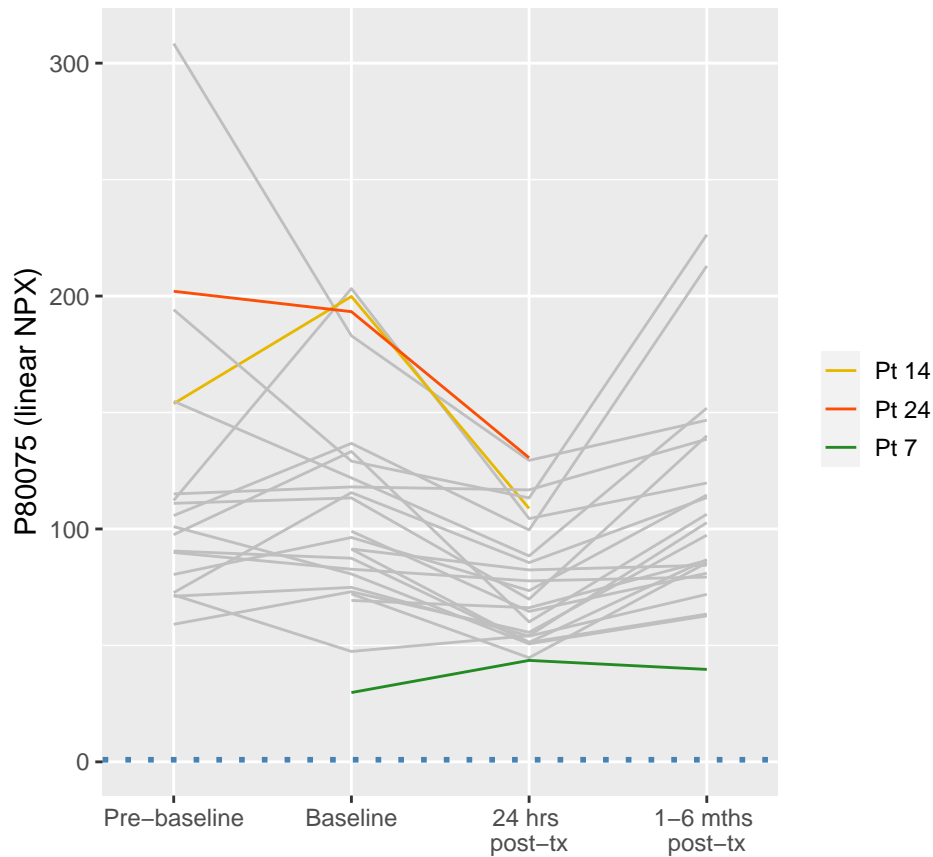

# Uniprot ID: P13236, analyte:CCL4

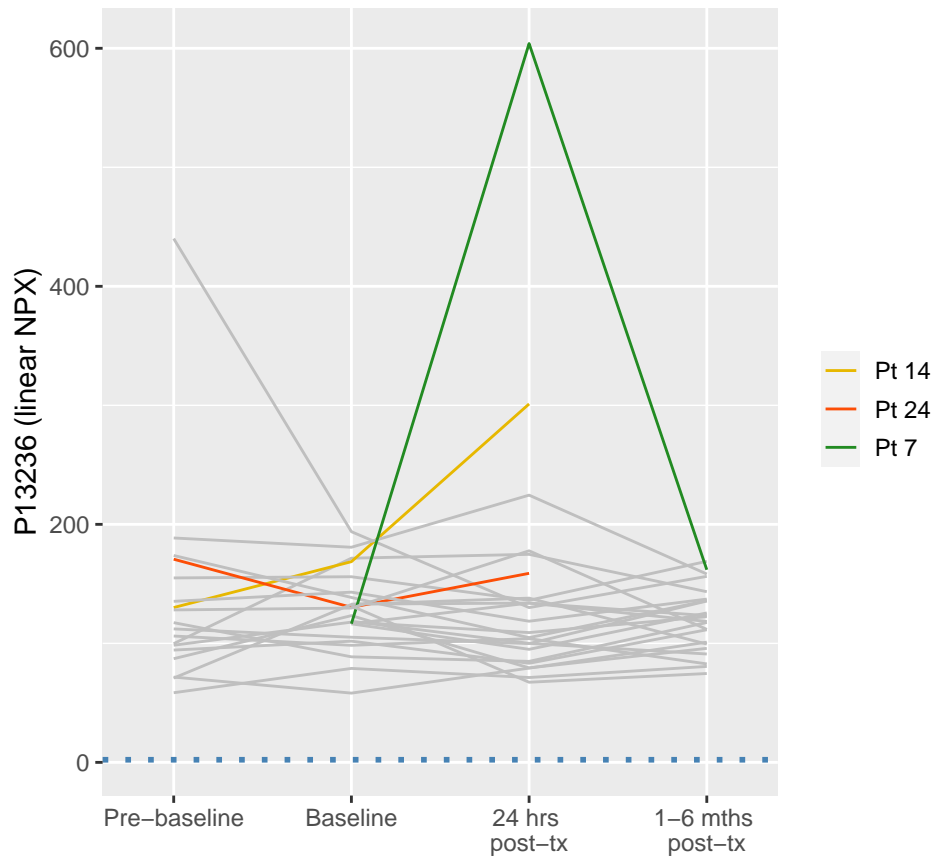

# Uniprot ID: P40933, analyte:IL15

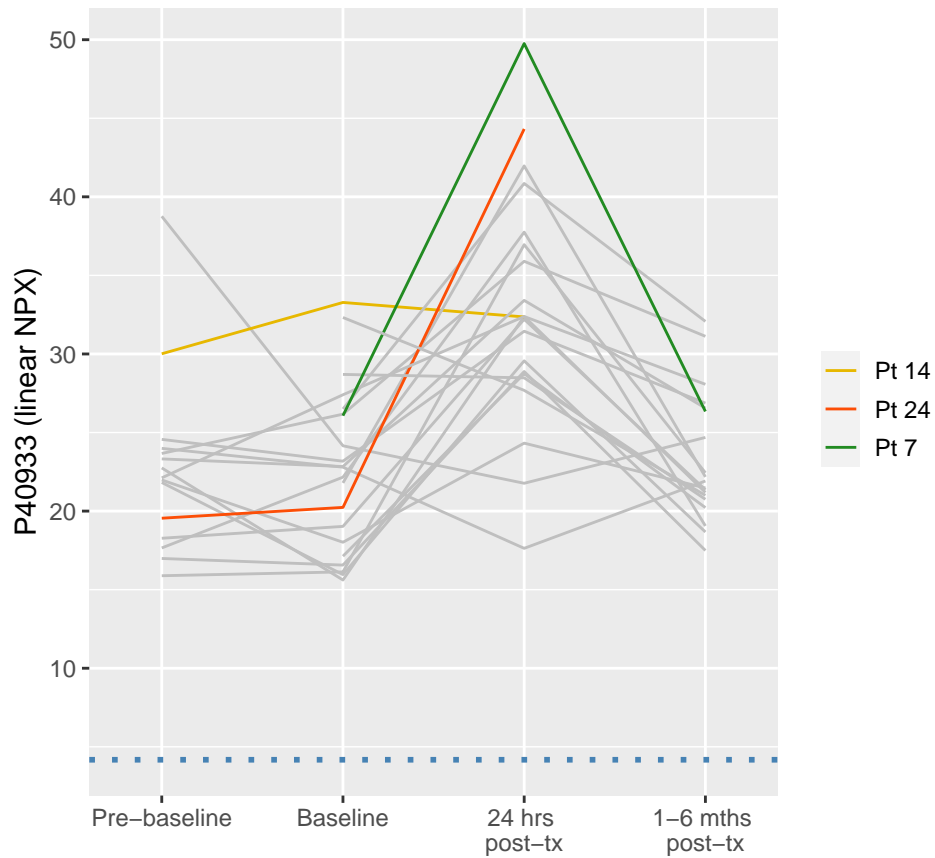

# Uniprot ID: P09382, analyte:Gal-1

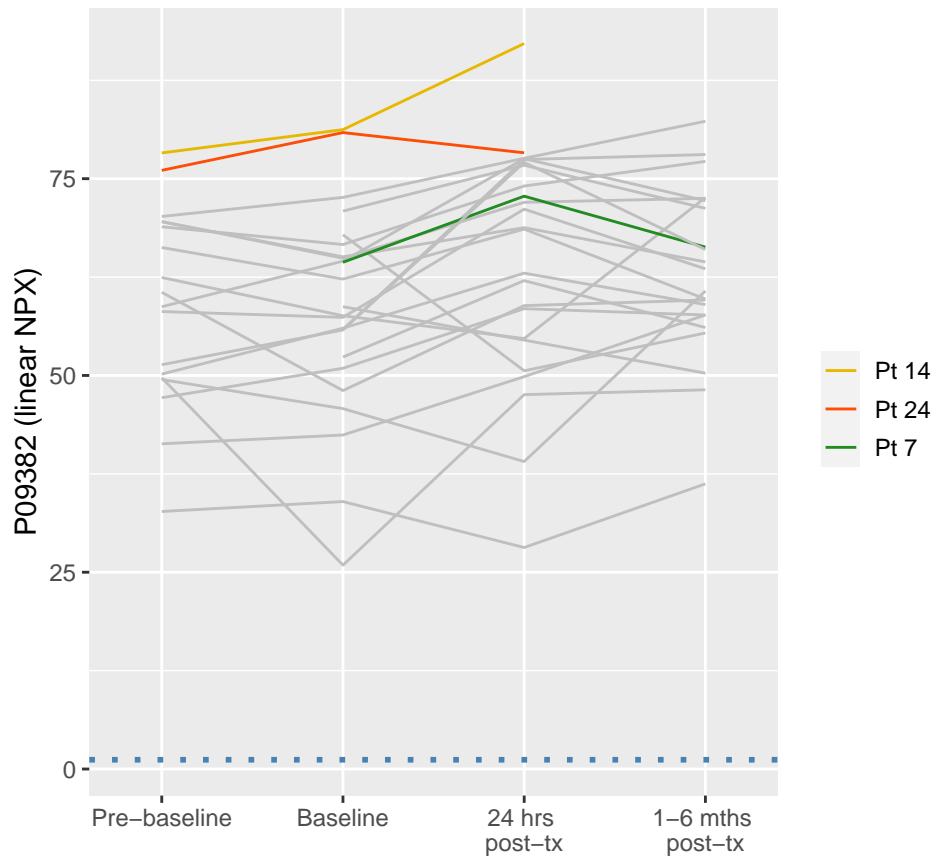

# Uniprot ID: Q9NZQ7, analyte:PD-L1

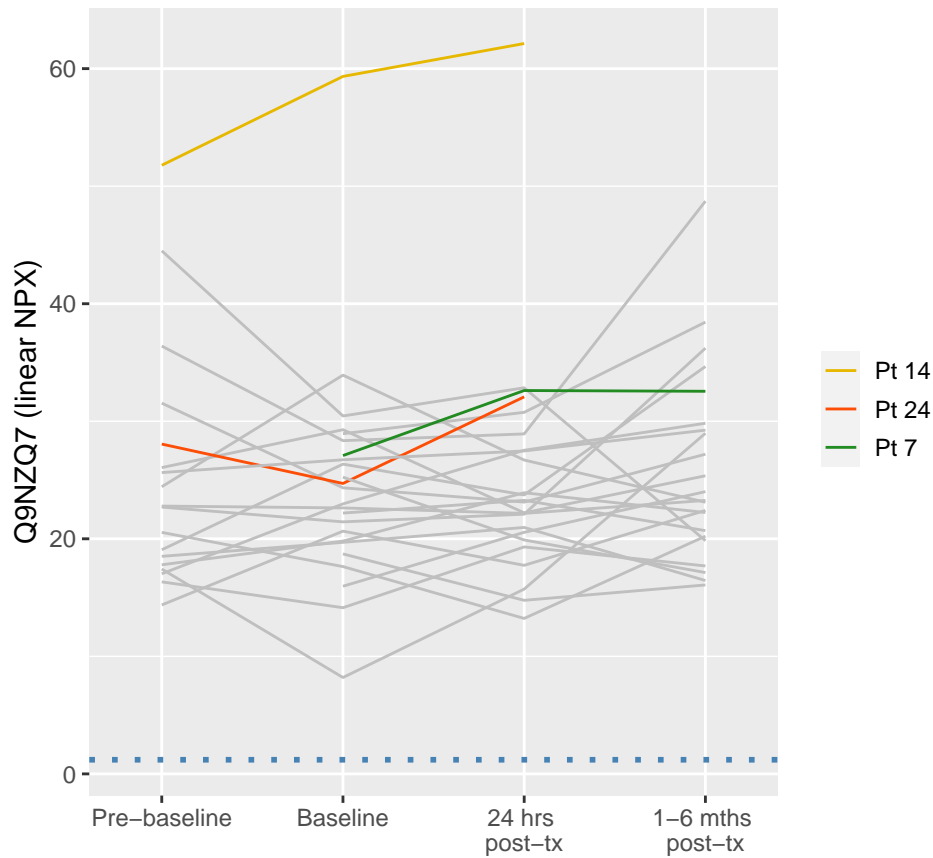

# Uniprot ID: P26842, analyte:CD27

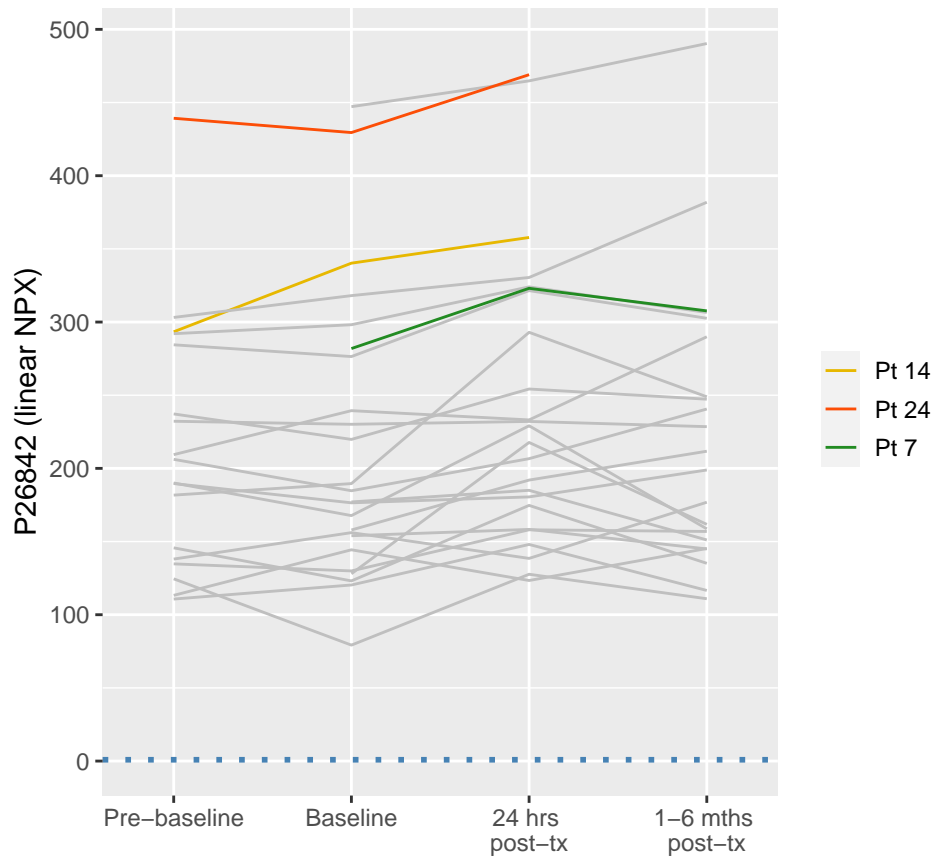

# Uniprot ID: P42830, analyte:CXCL5

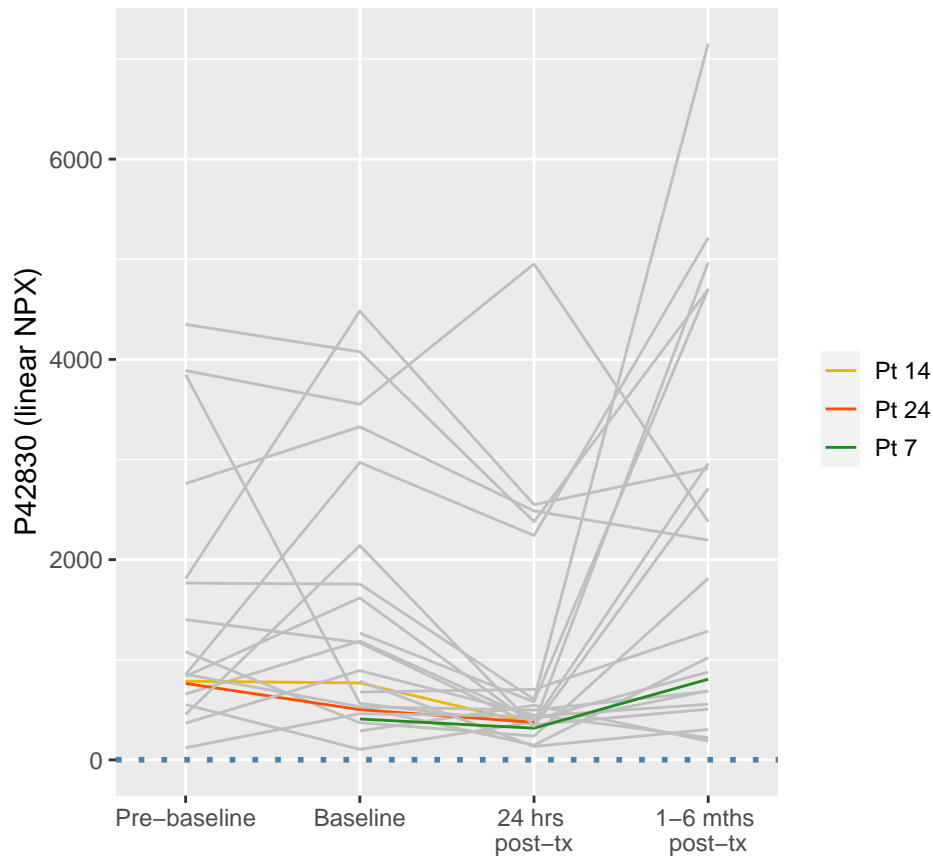

# Uniprot ID: P05113, analyte:IL5

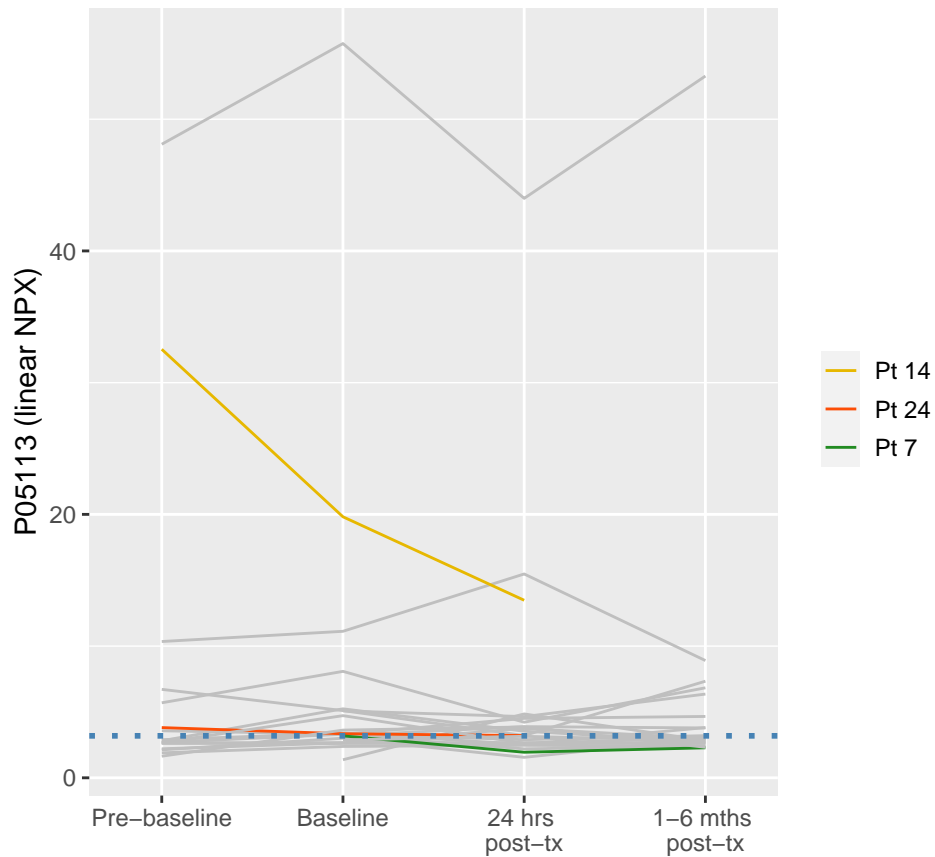



# Uniprot ID: P14210, analyte:HGF

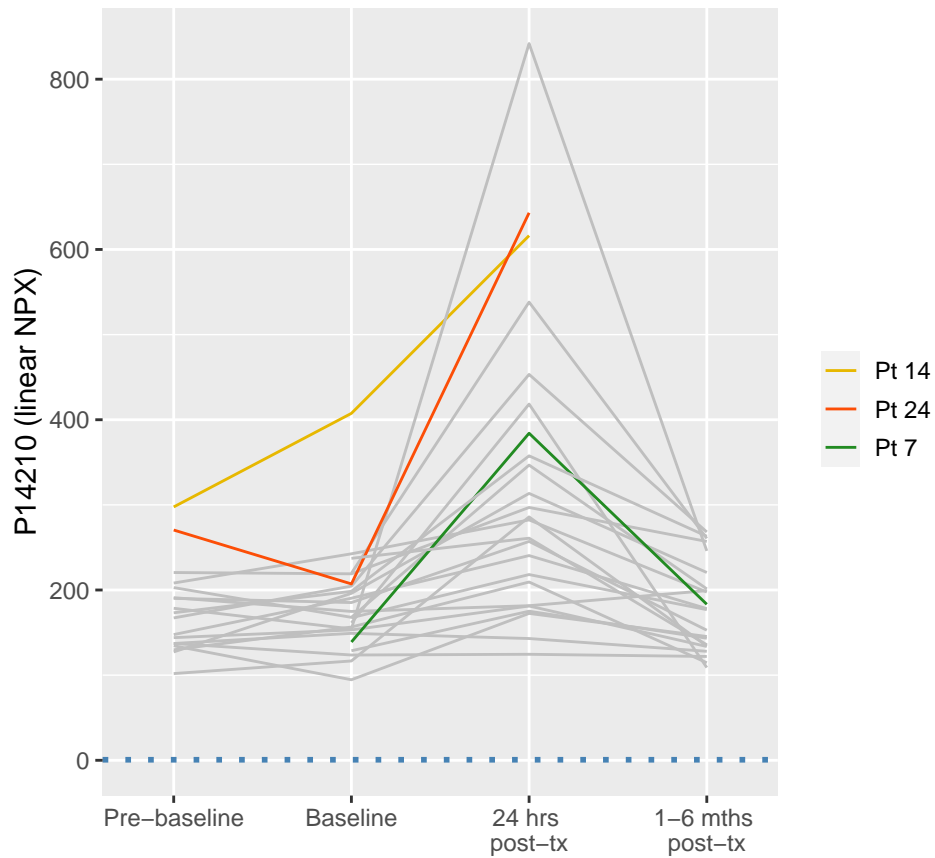

# Uniprot ID: P12544, analyte:GZMA

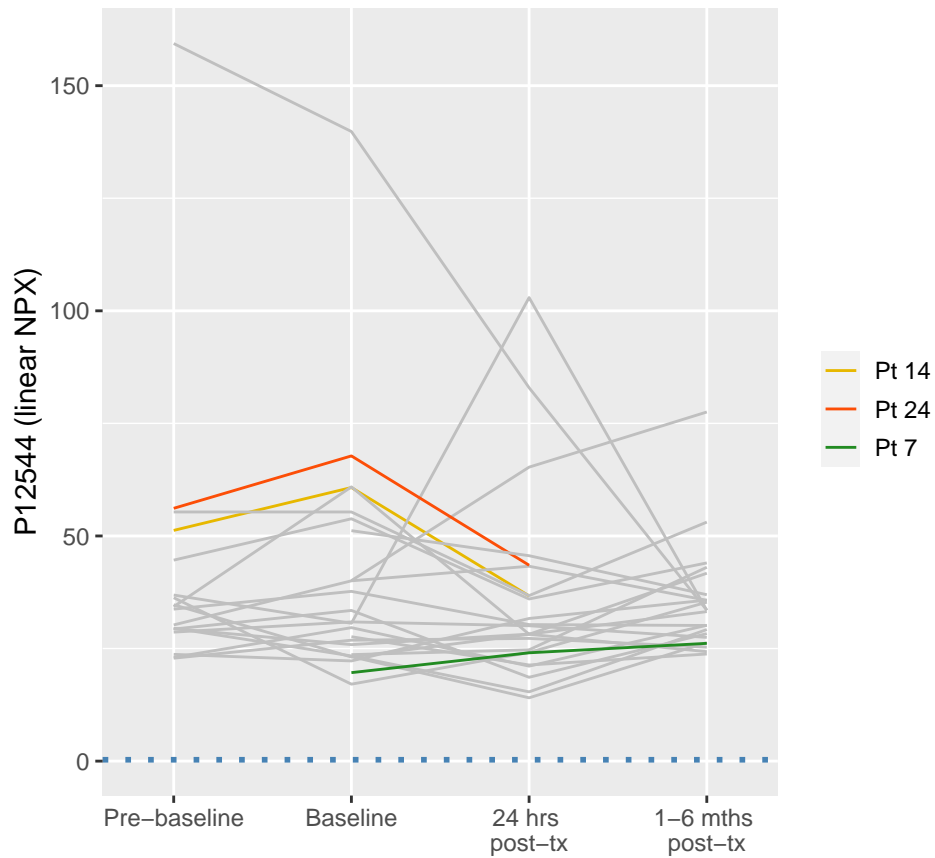

# Uniprot ID: P09601, analyte:HO-1

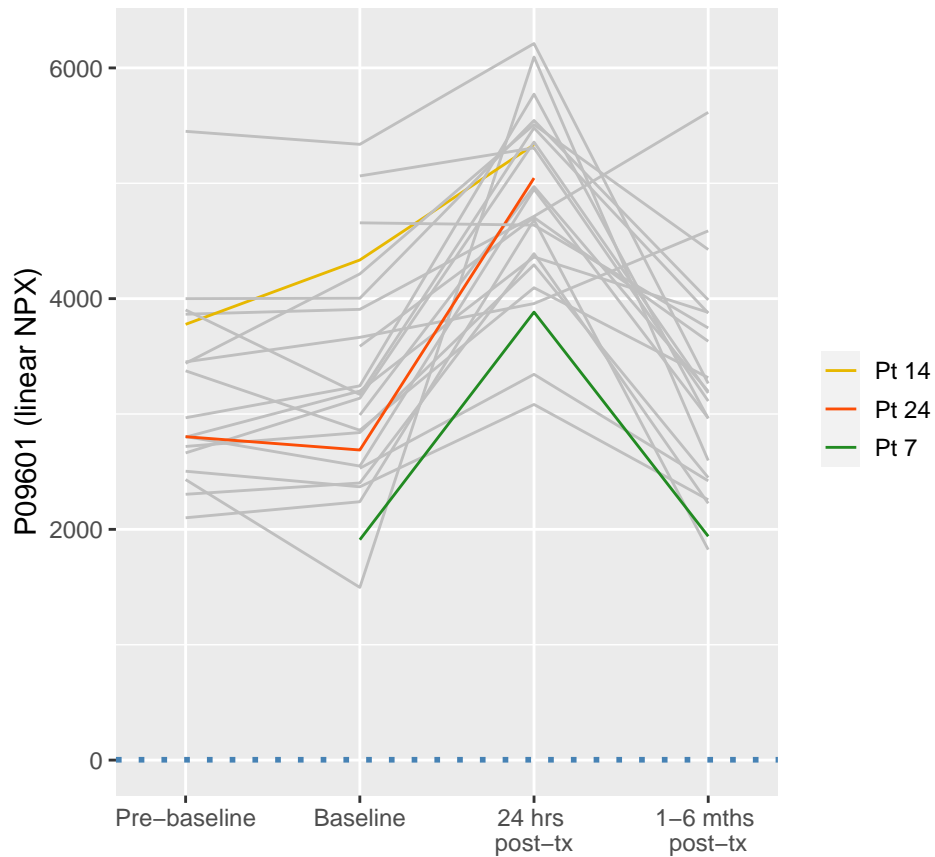

# Uniprot ID: P78423, analyte:CX3CL1

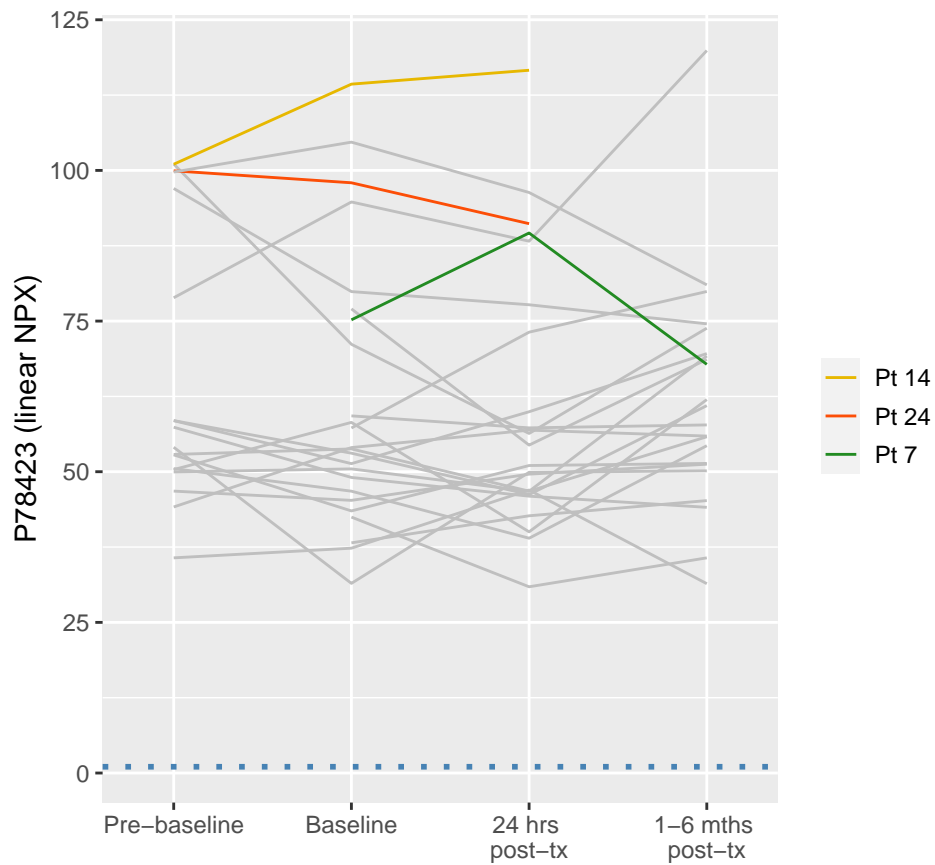

# Uniprot ID: P02778, analyte:CXCL10

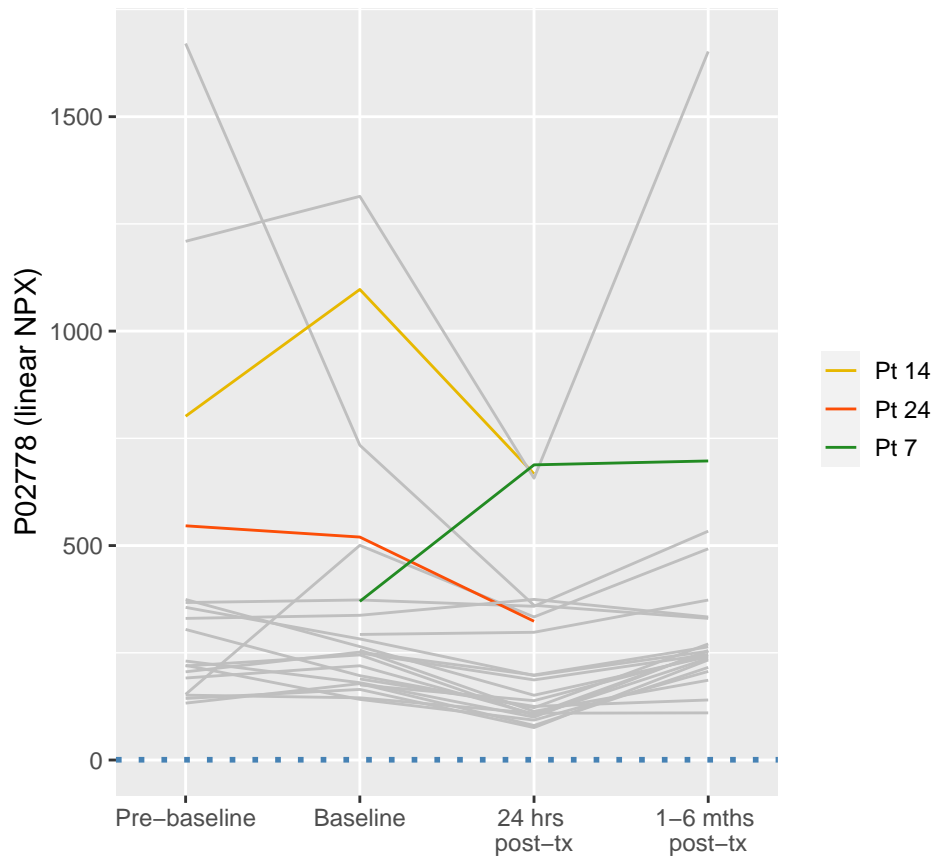

# Uniprot ID: P32970, analyte:CD70

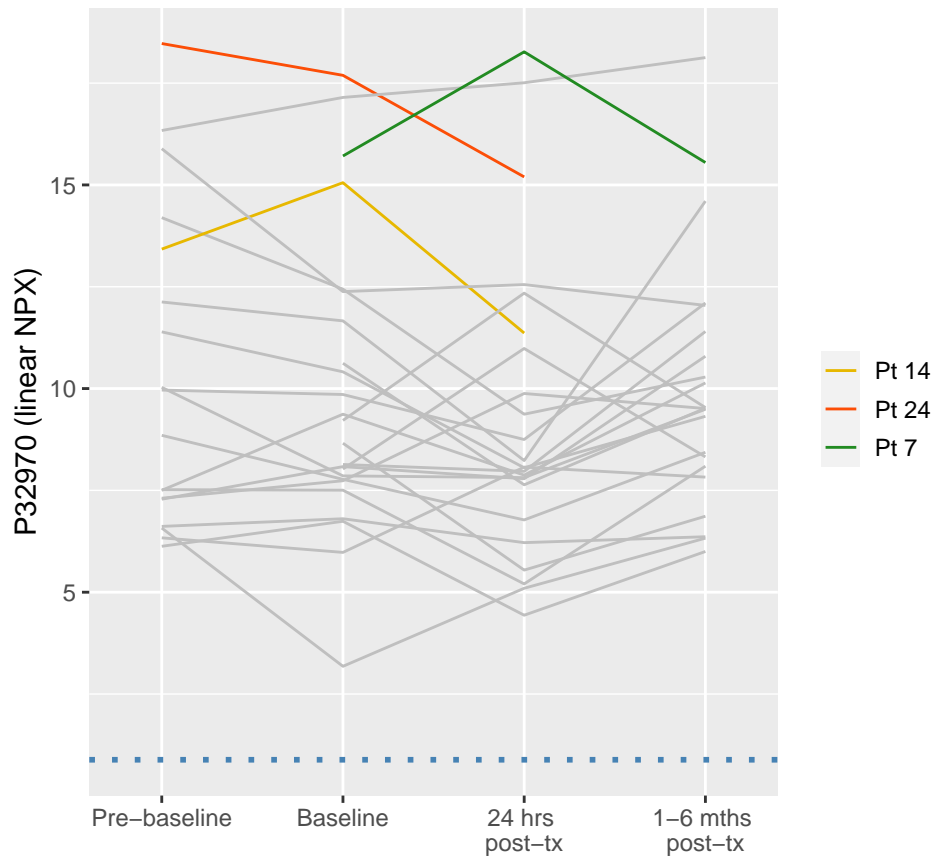

# Uniprot ID: P22301, analyte:IL10

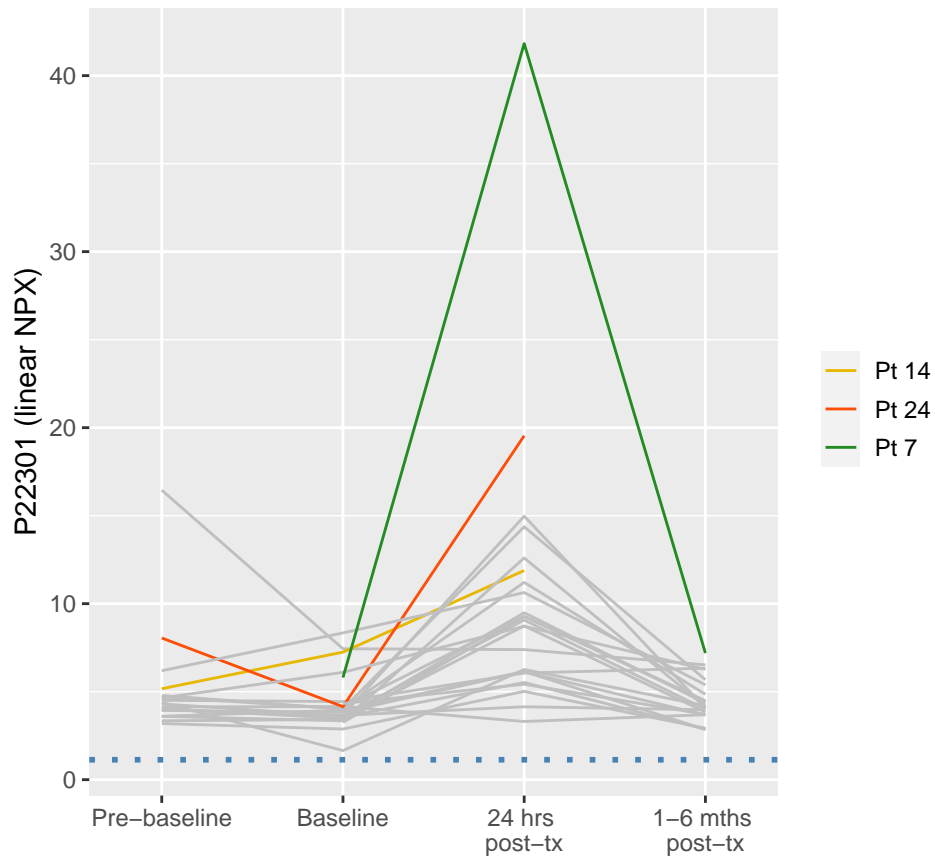

# Uniprot ID: Q9NP84, analyte:TNFRSF12A

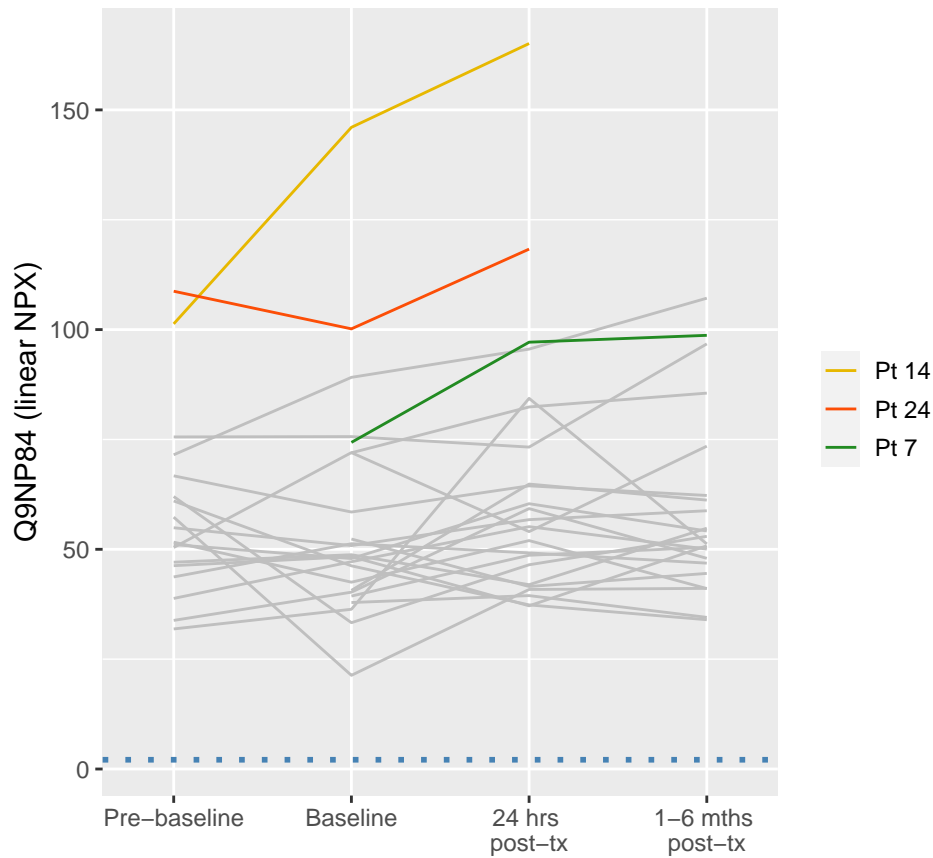



# Uniprot ID: P55773, analyte:CCL23

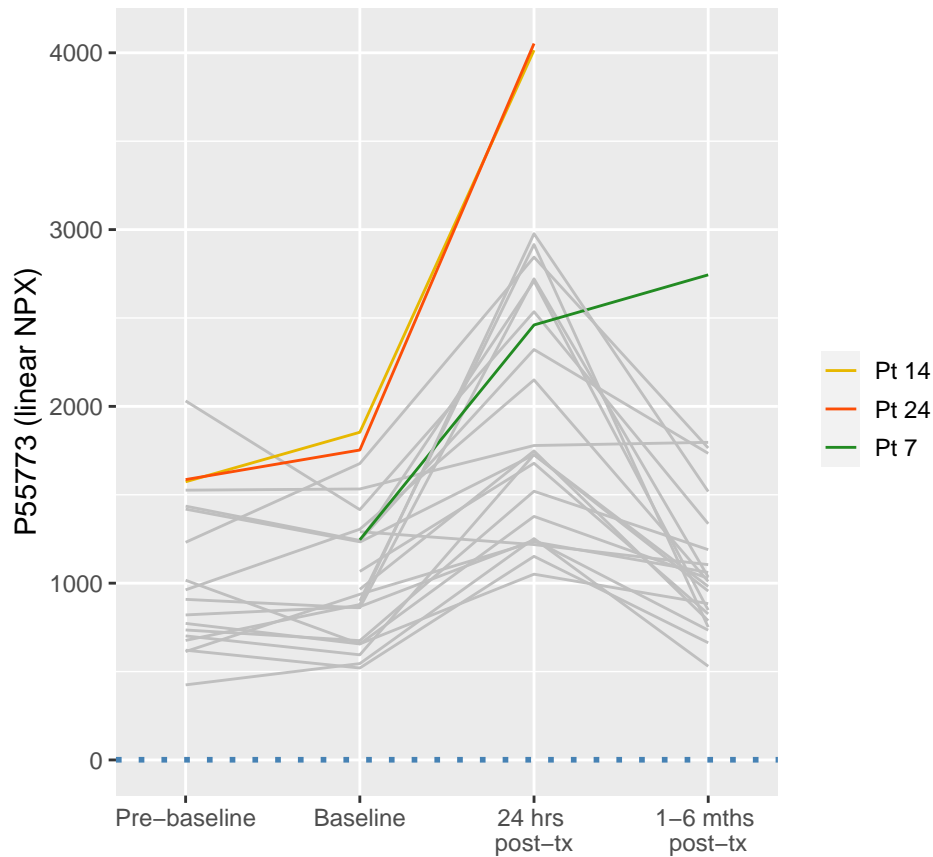

# Uniprot ID: P06127, analyte:CD5

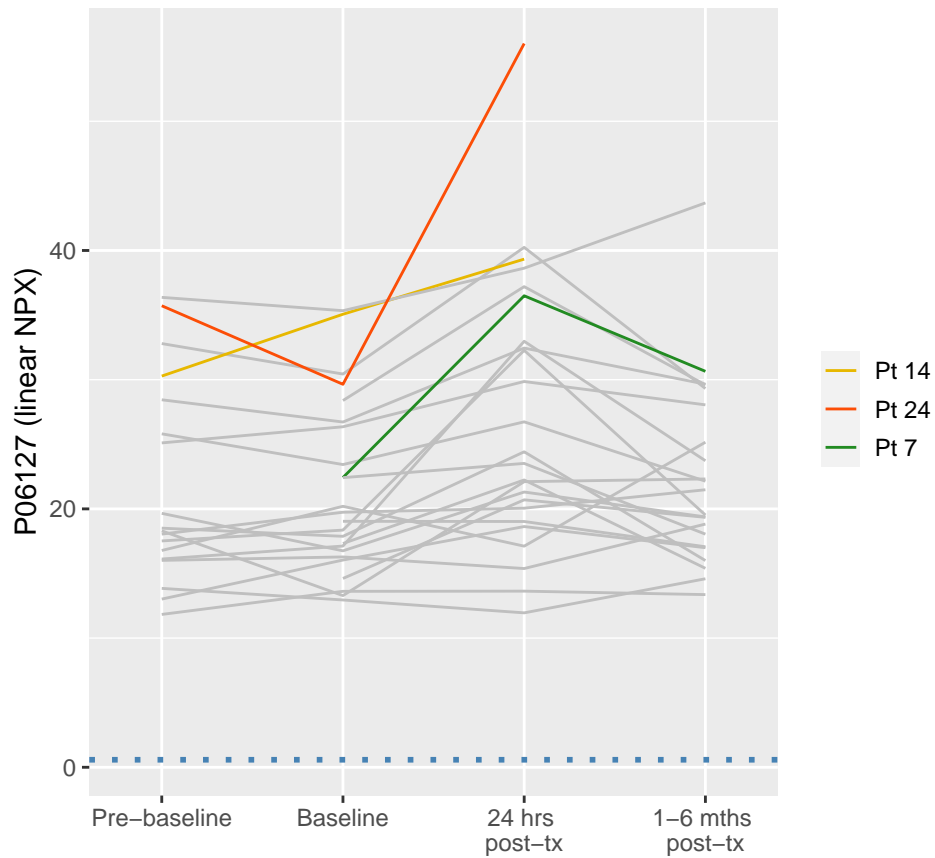

# Uniprot ID: P10147, analyte:CCL3

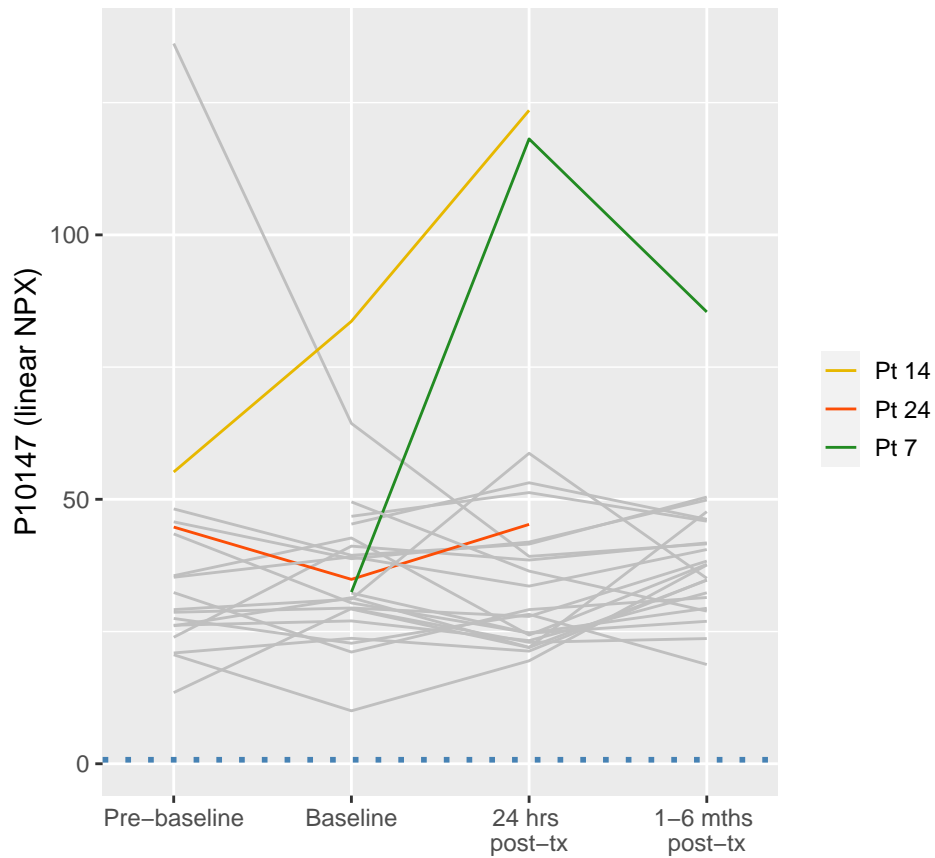

# Uniprot ID: P09237, analyte:MMP7

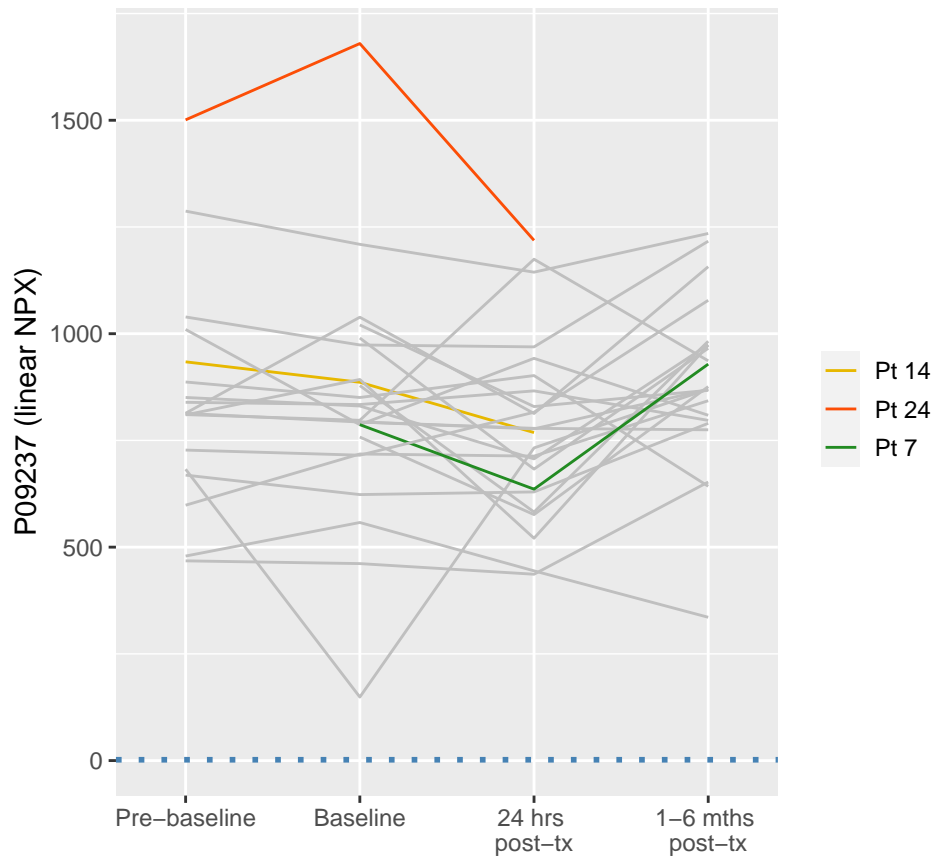

# Uniprot ID: P05089, analyte:ARG1

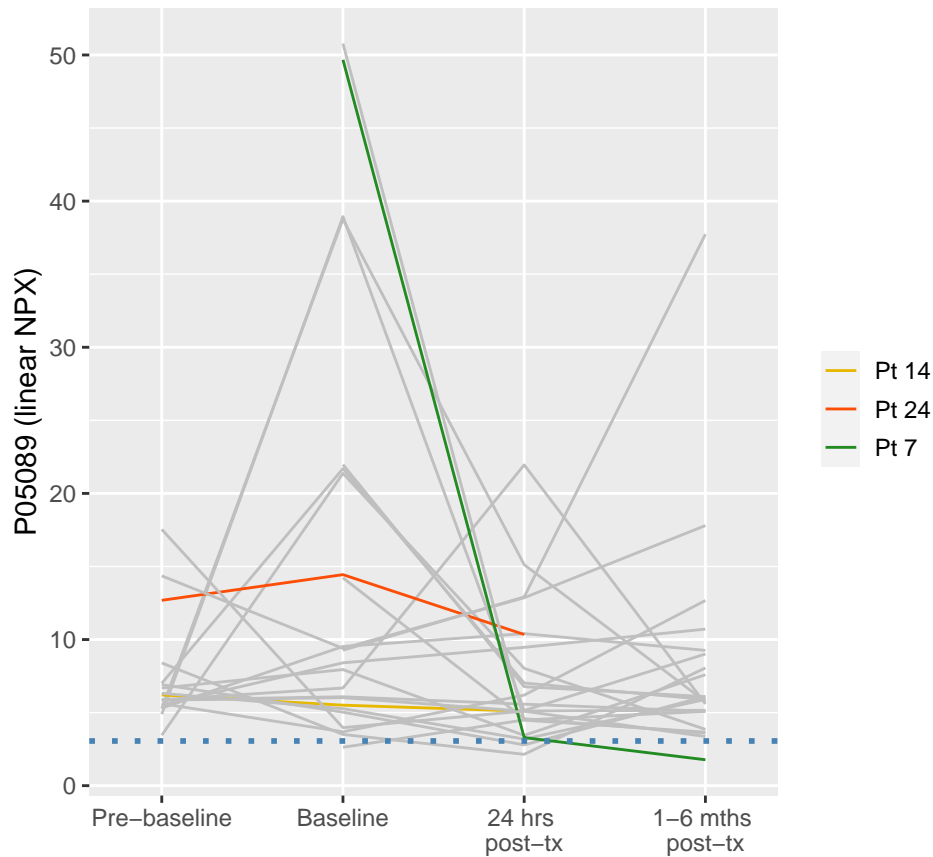

# Uniprot ID: O76036, analyte:NCR1

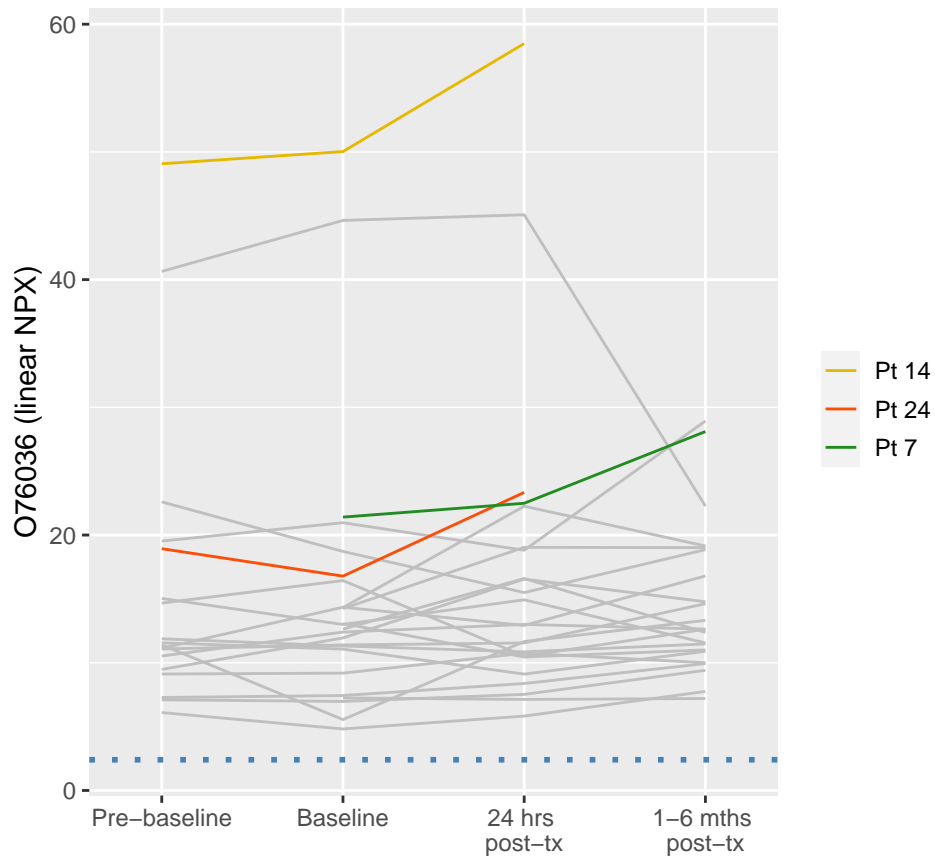

# Uniprot ID: P07585, analyte:DCN

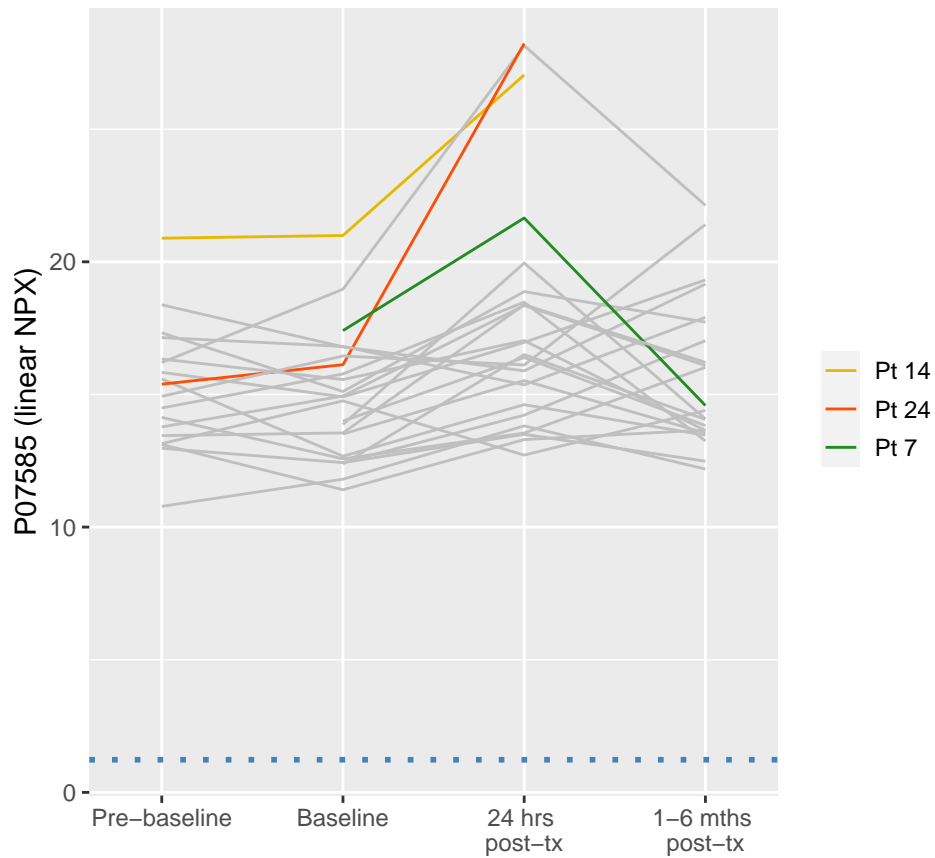

# Uniprot ID: O75509, analyte:TNFRSF21

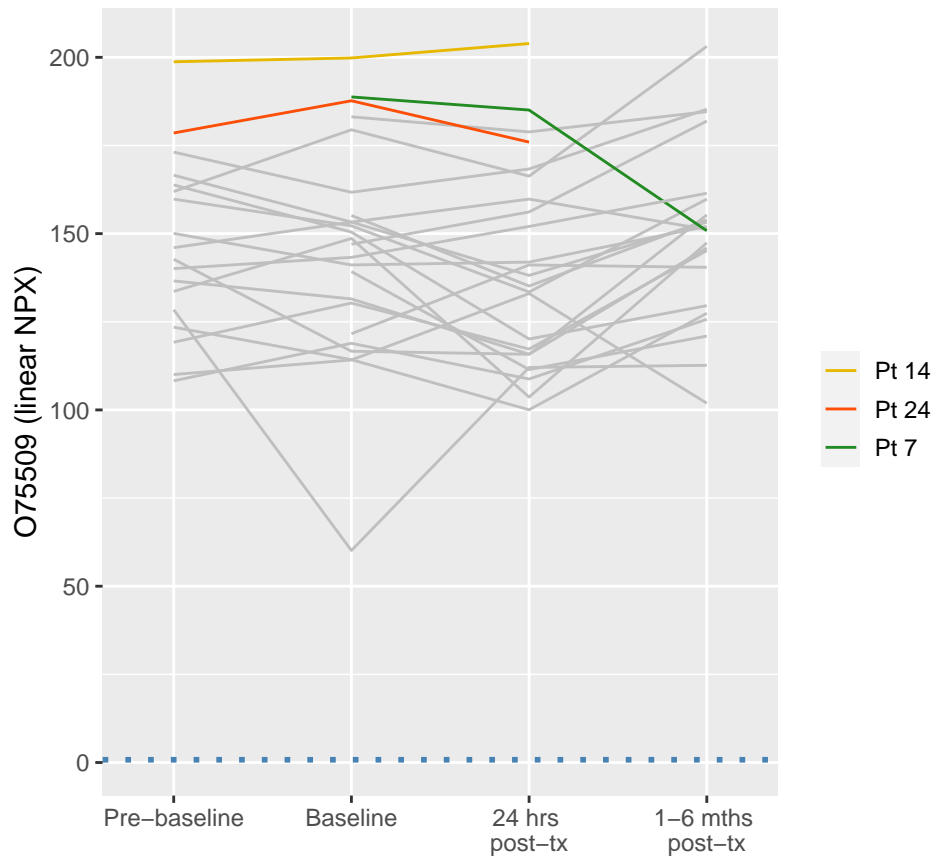



# Uniprot ID: P43489, analyte:TNFRSF4

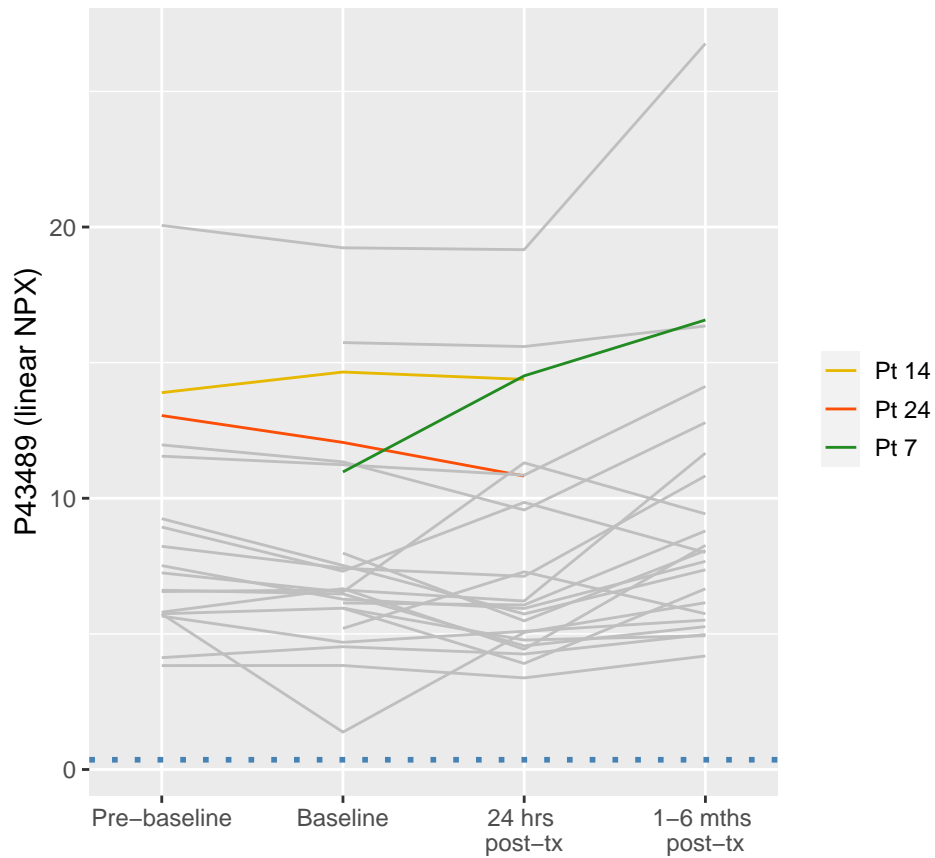

# Uniprot ID: Q29983.Q29980, analyte:MIC-A/B

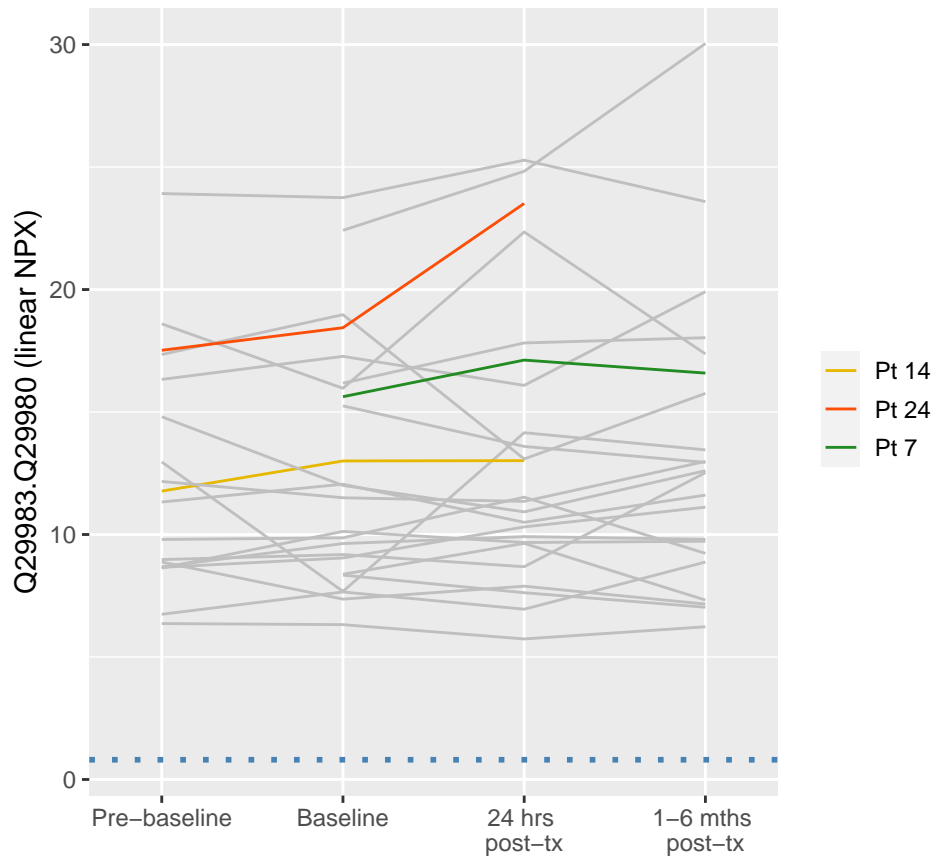

# Uniprot ID: Q92583, analyte:CCL17

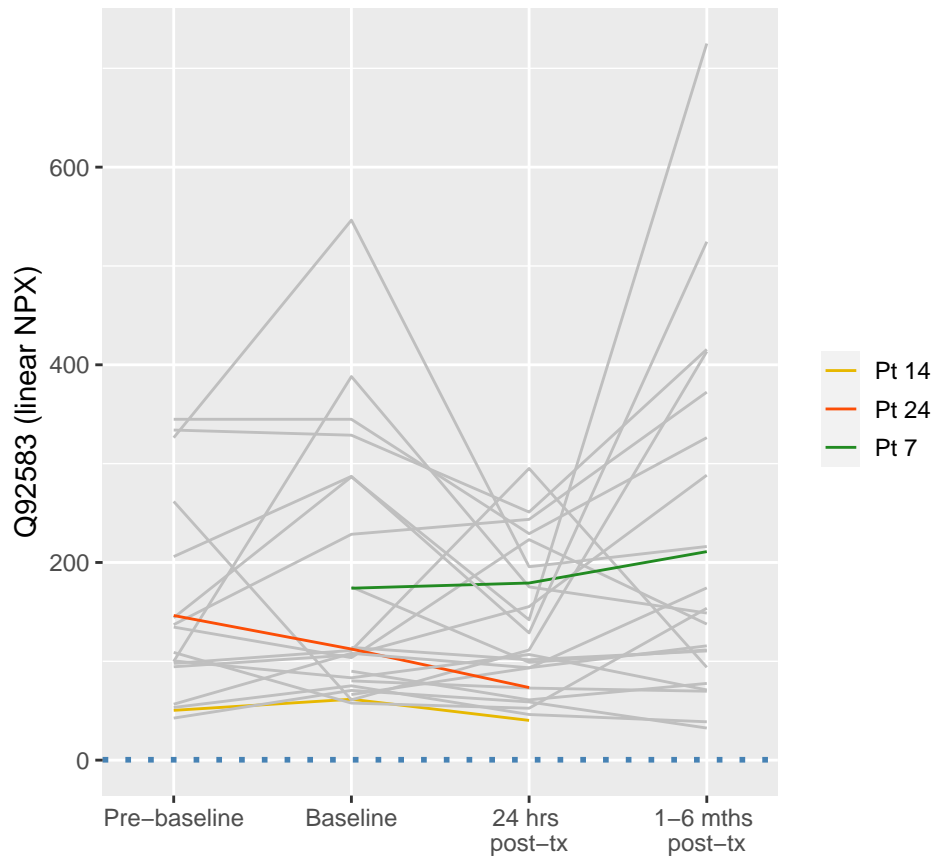

# Uniprot ID: O15123, analyte:ANGPT2

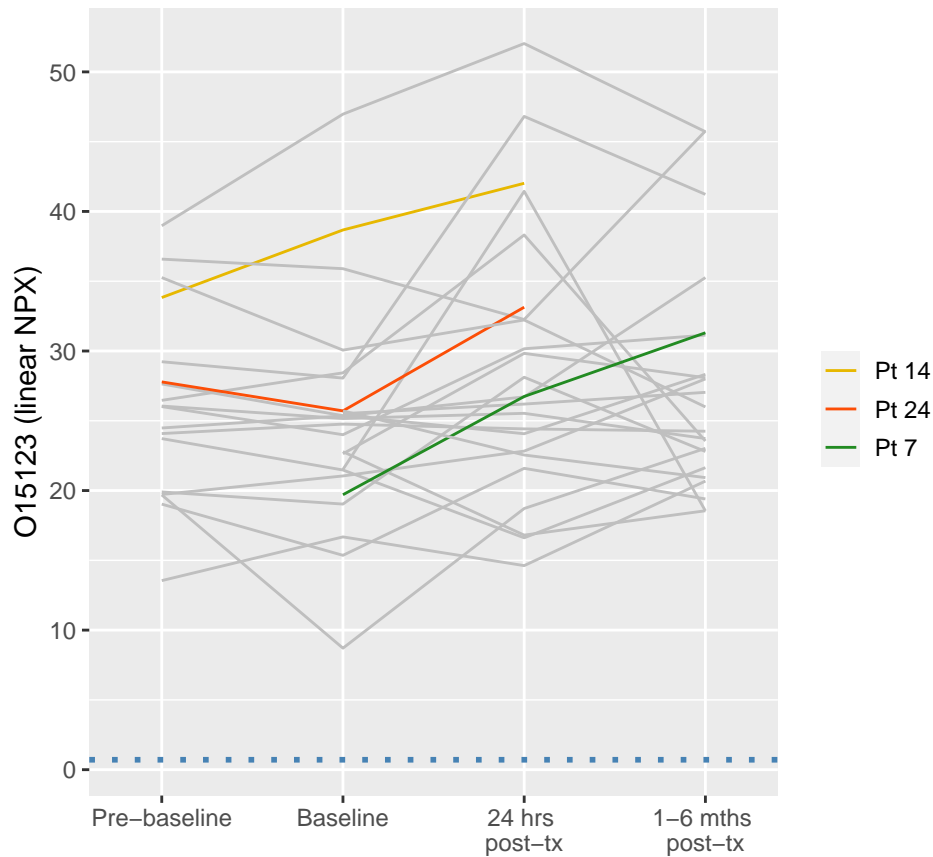

# Uniprot ID: P21246, analyte:PTN

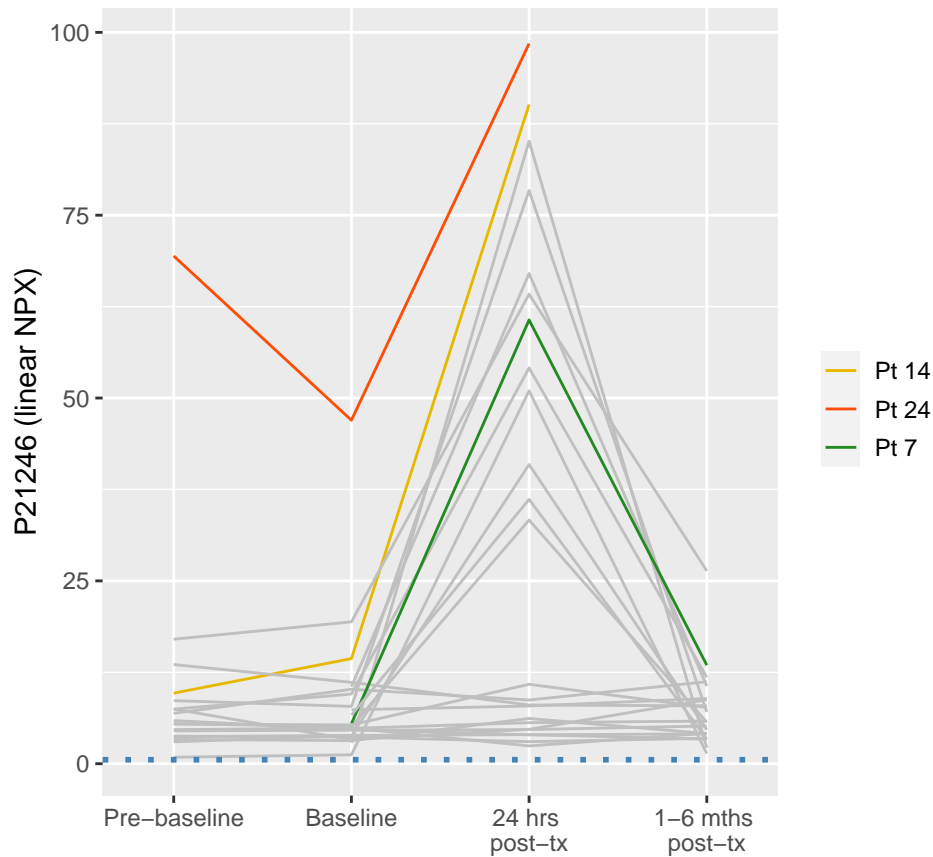

# Uniprot ID: P48061, analyte: CXCL12

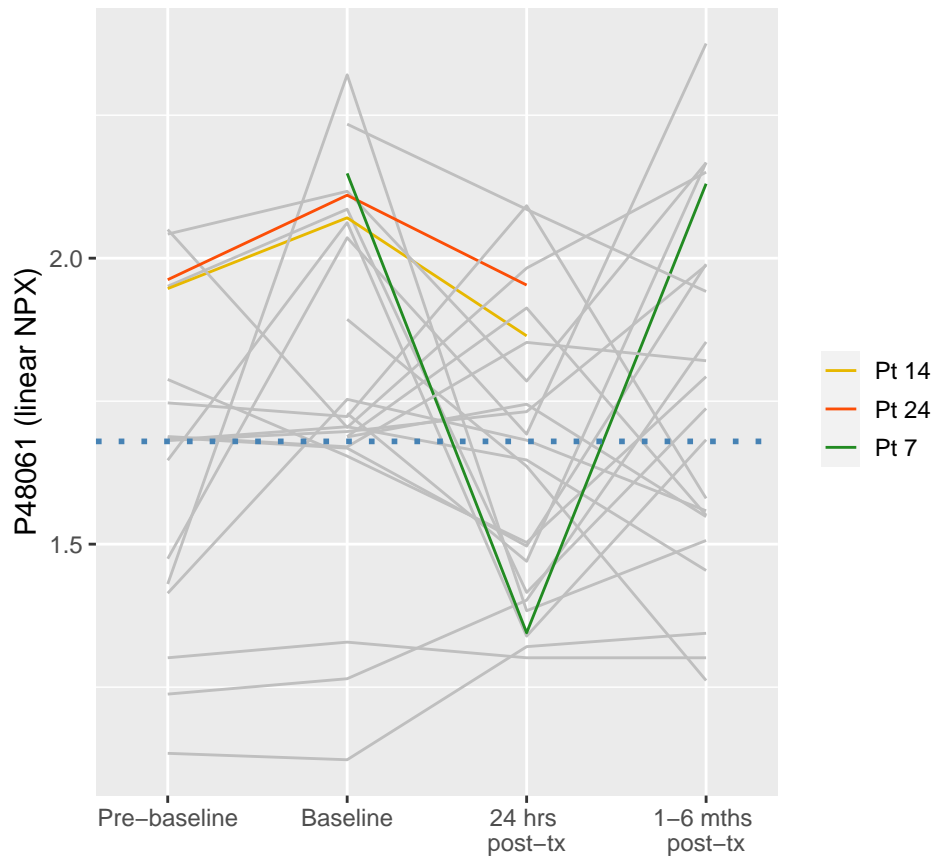

# Uniprot ID: P01579, analyte:IFN-gamma

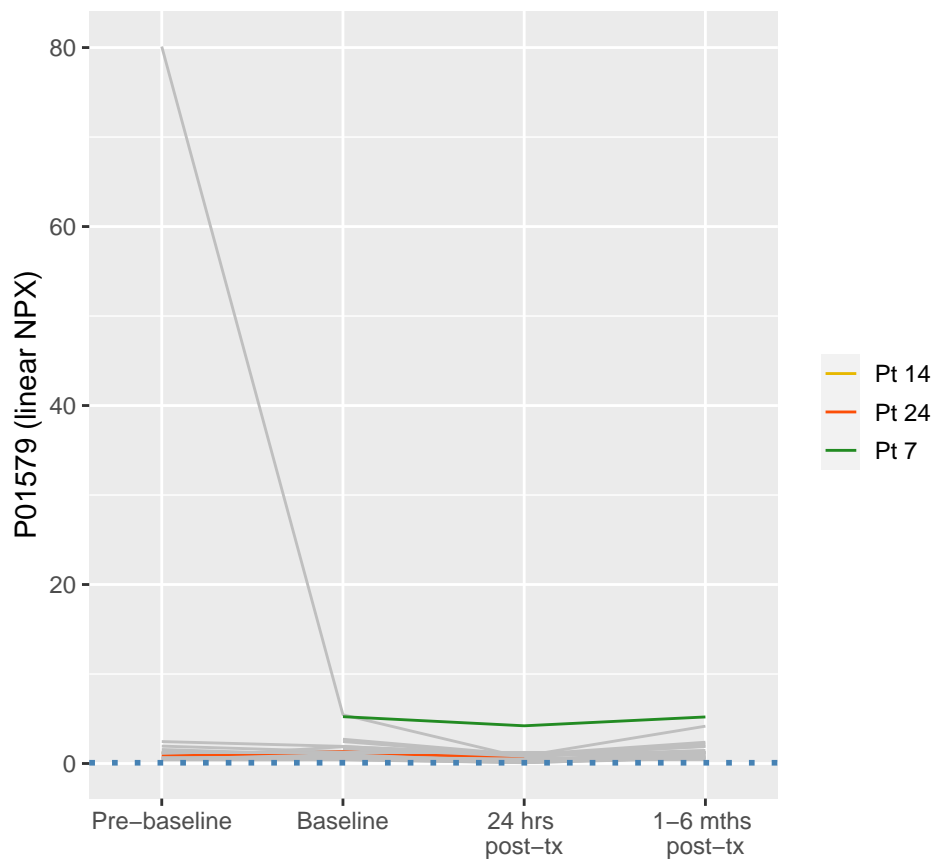

# Uniprot ID: Q9UQV4, analyte:LAMP3

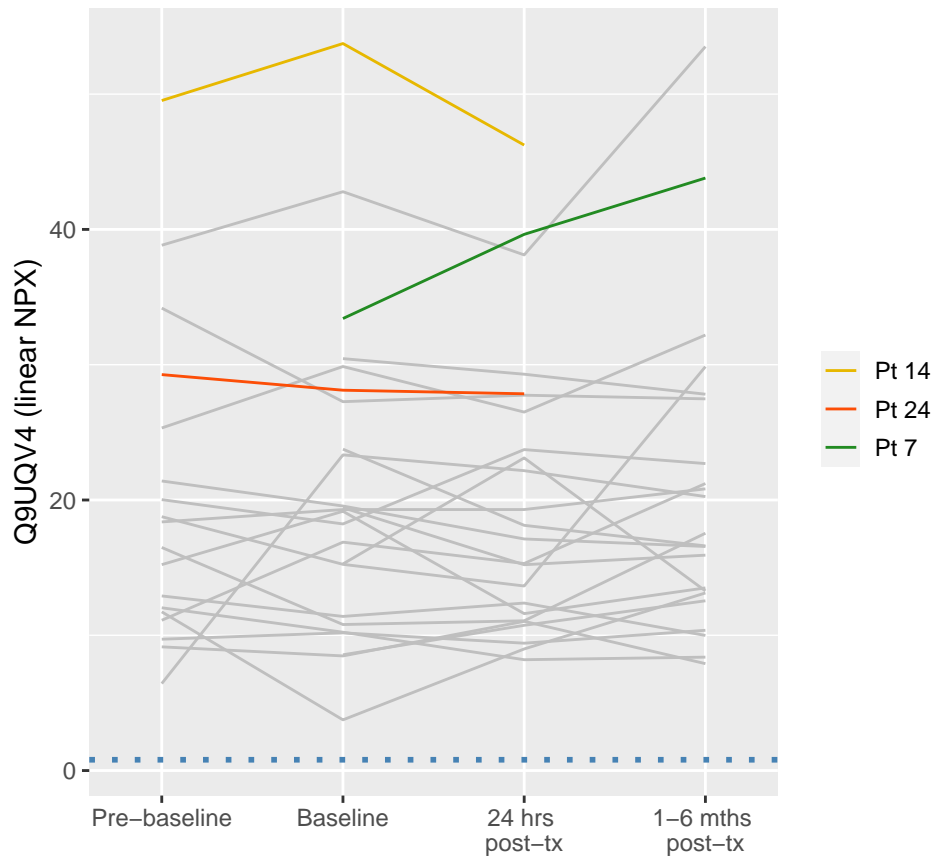



# Uniprot ID: Q14790, analyte:CASP-8

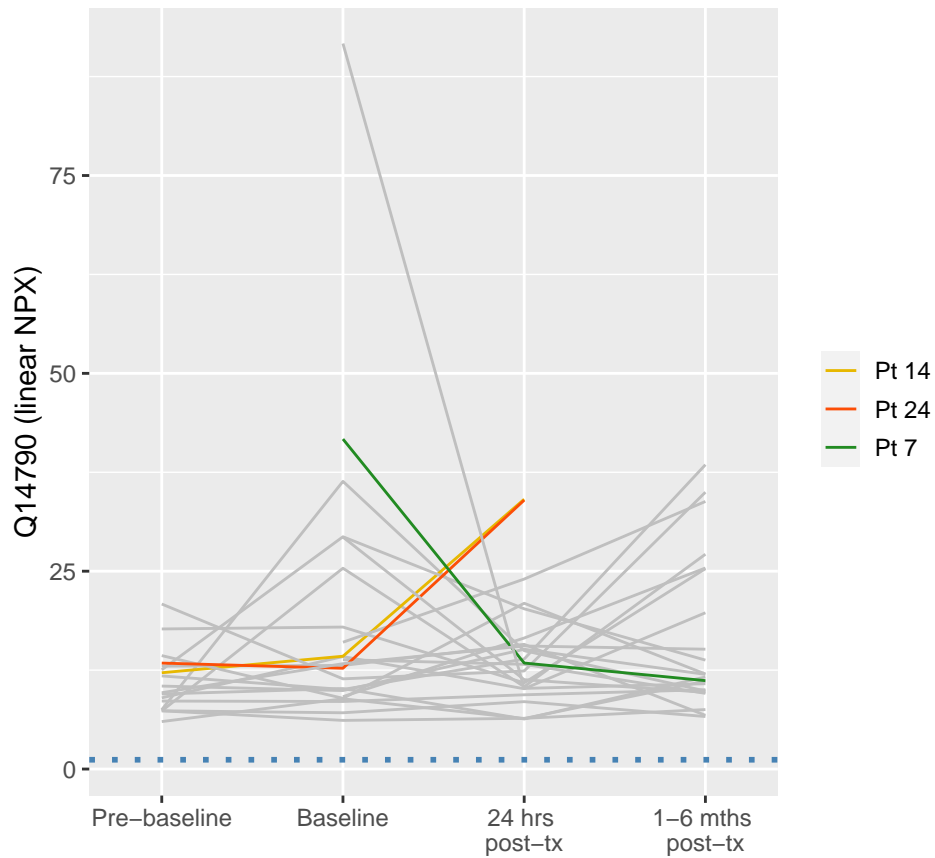

# Uniprot ID: O75144, analyte:ICOSLG

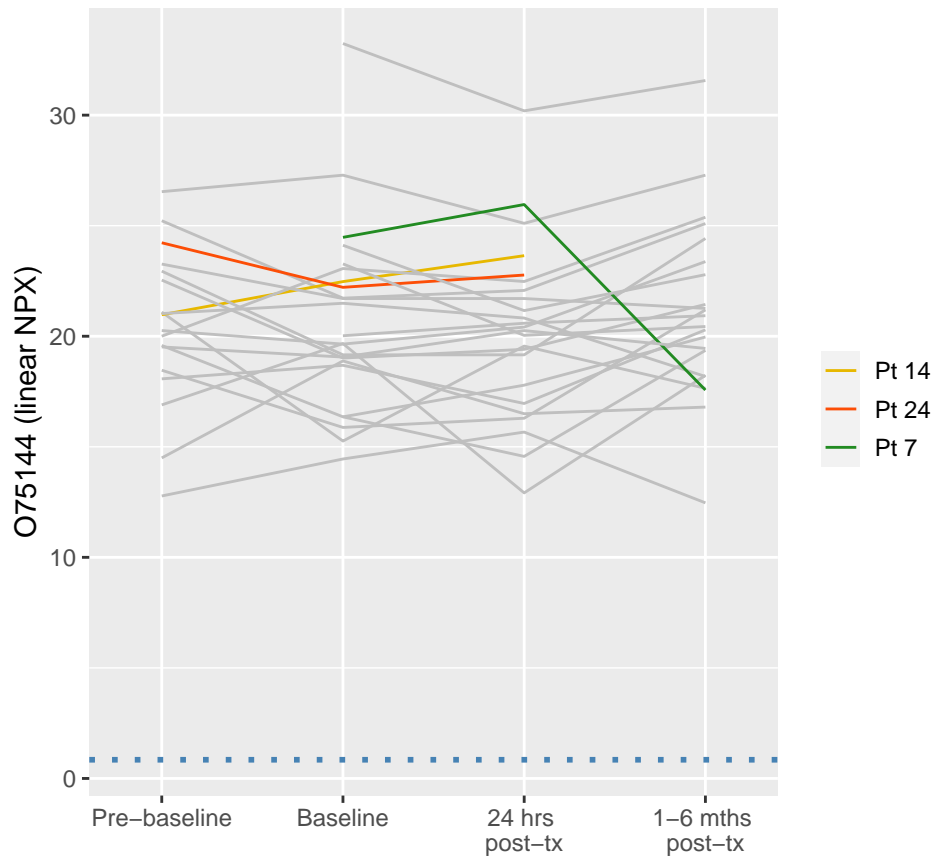

# Uniprot ID: P39900, analyte:MMP12

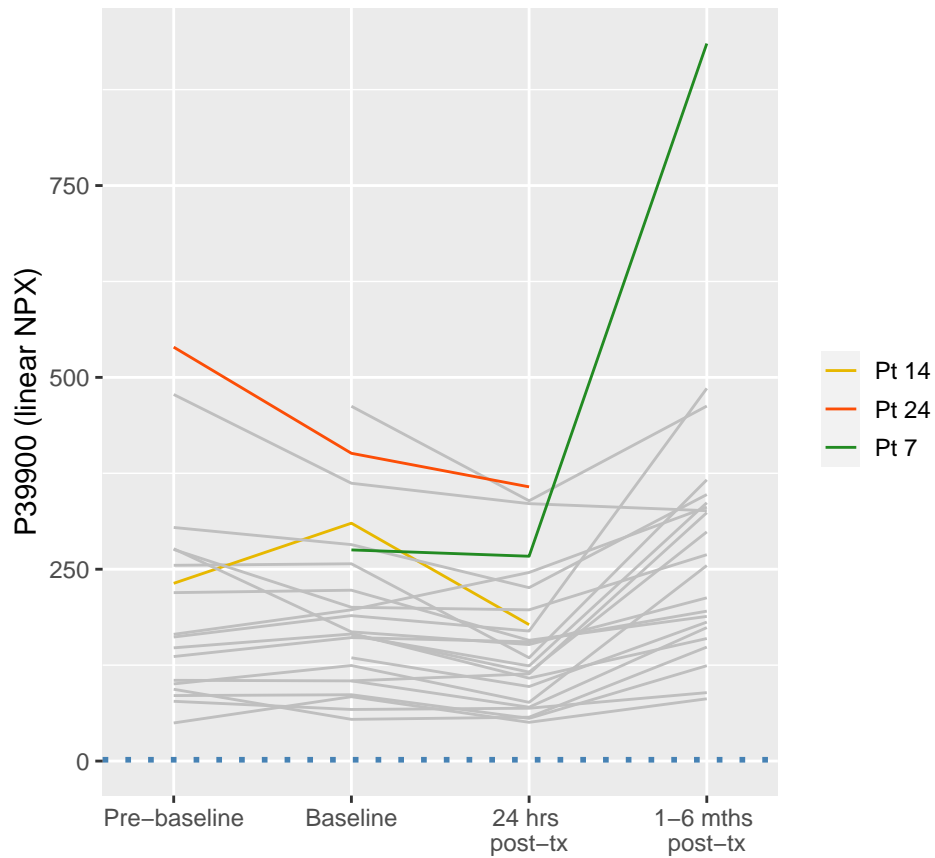

# Uniprot ID: O43927, analyte:CXCL13

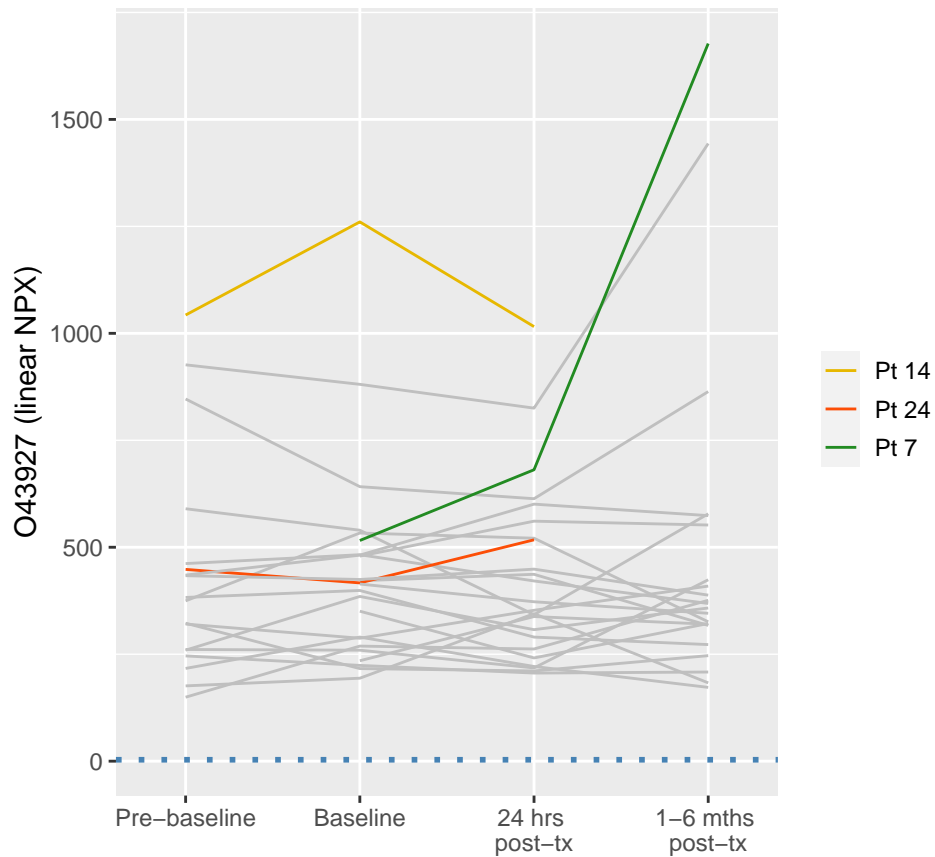

# Uniprot ID: Q9BQ51, analyte:PD-L2

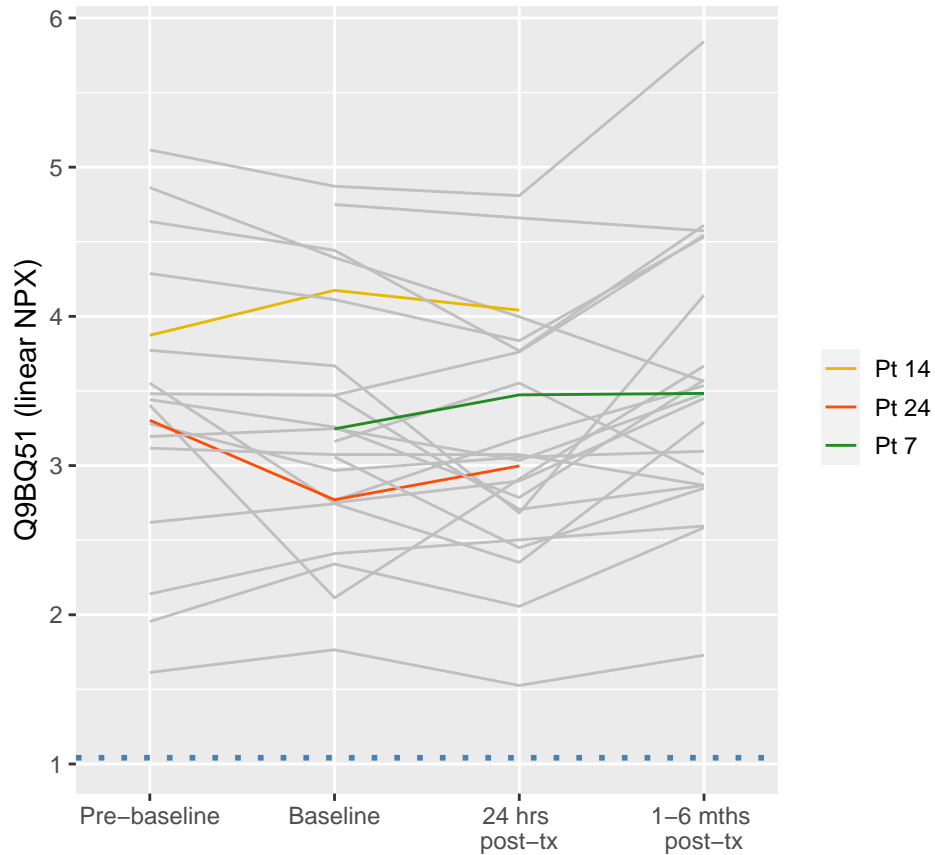

# Uniprot ID: P15692, analyte:VEGFA

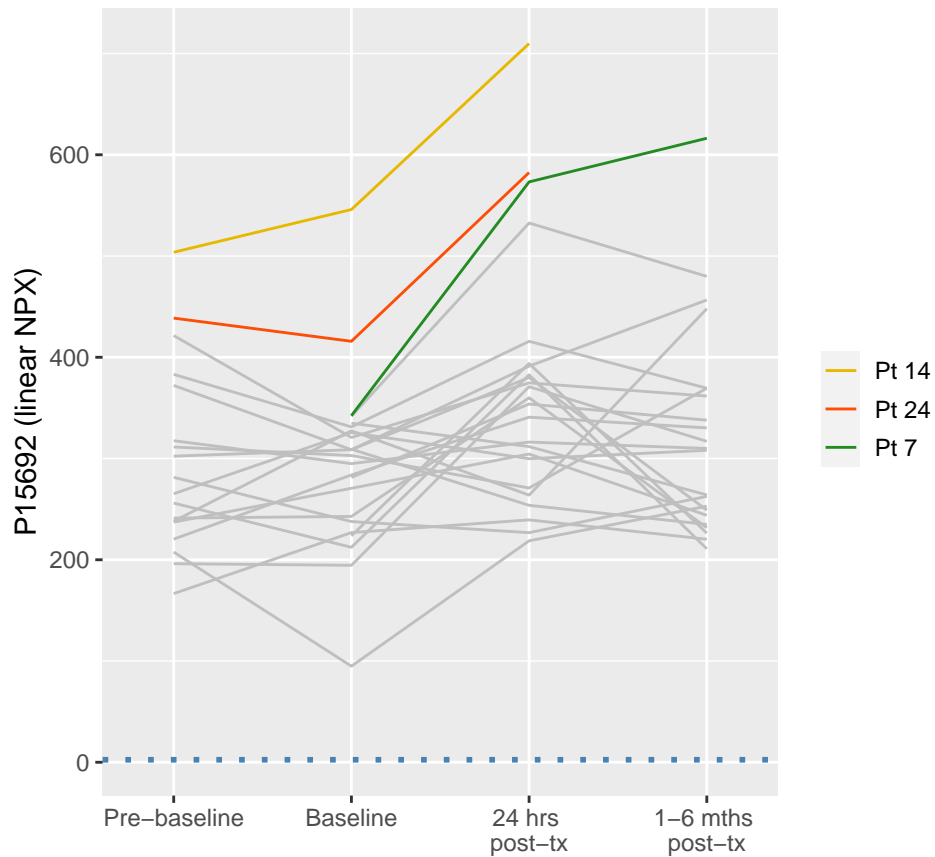

# Uniprot ID: P18627, analyte:LAG3

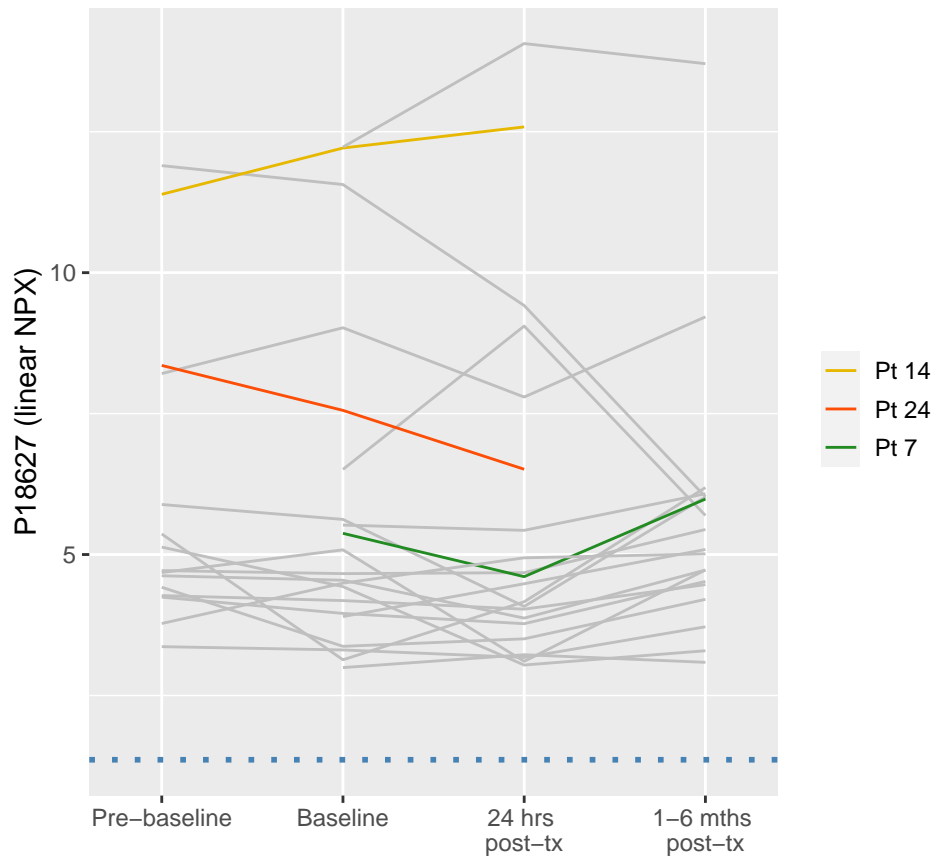

# Uniprot ID: P42701, analyte:IL12RB1

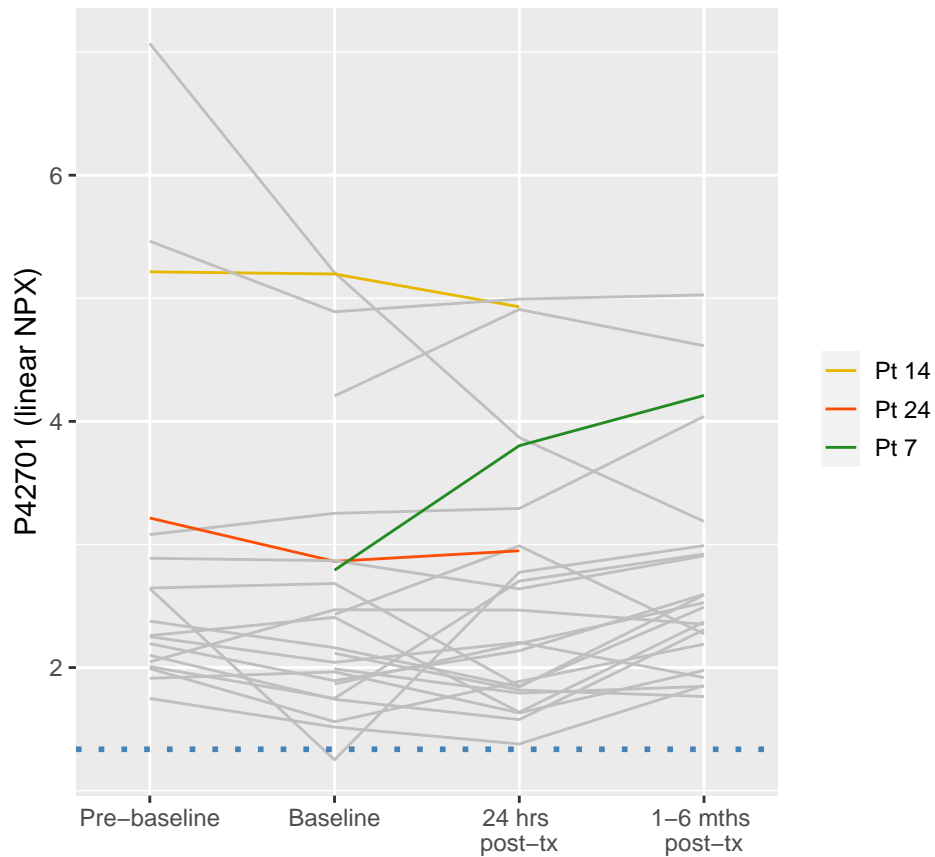



# Uniprot ID: P78556, analyte:CCL20

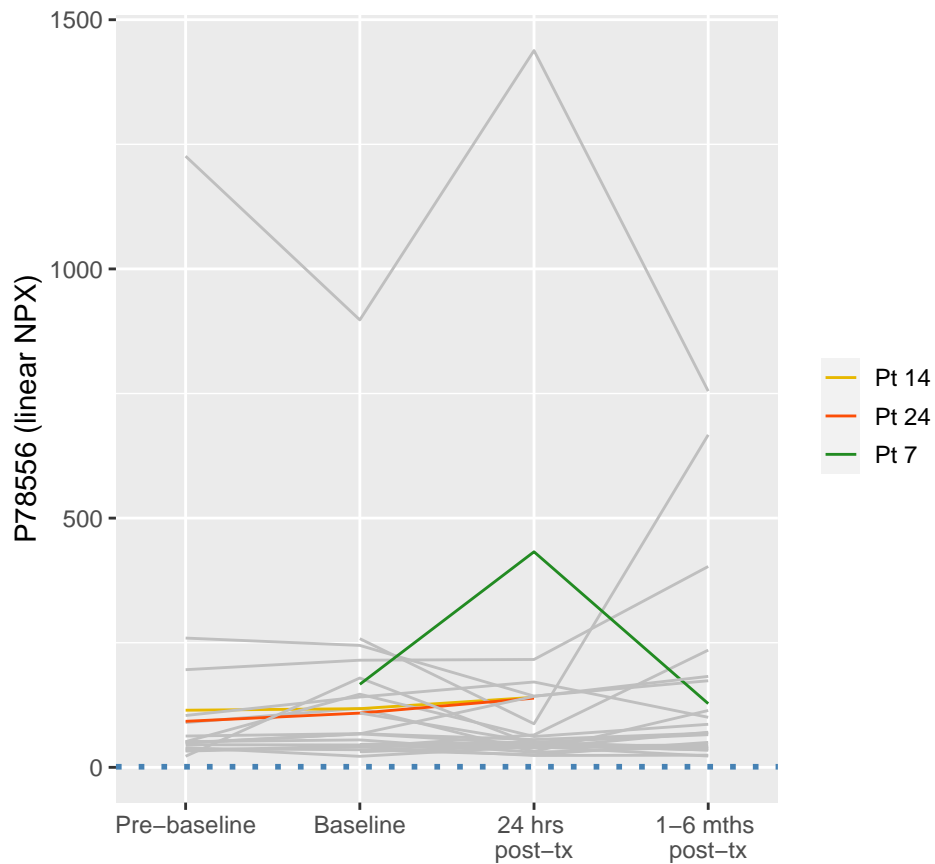

# Uniprot ID: P01375, analyte:TNF

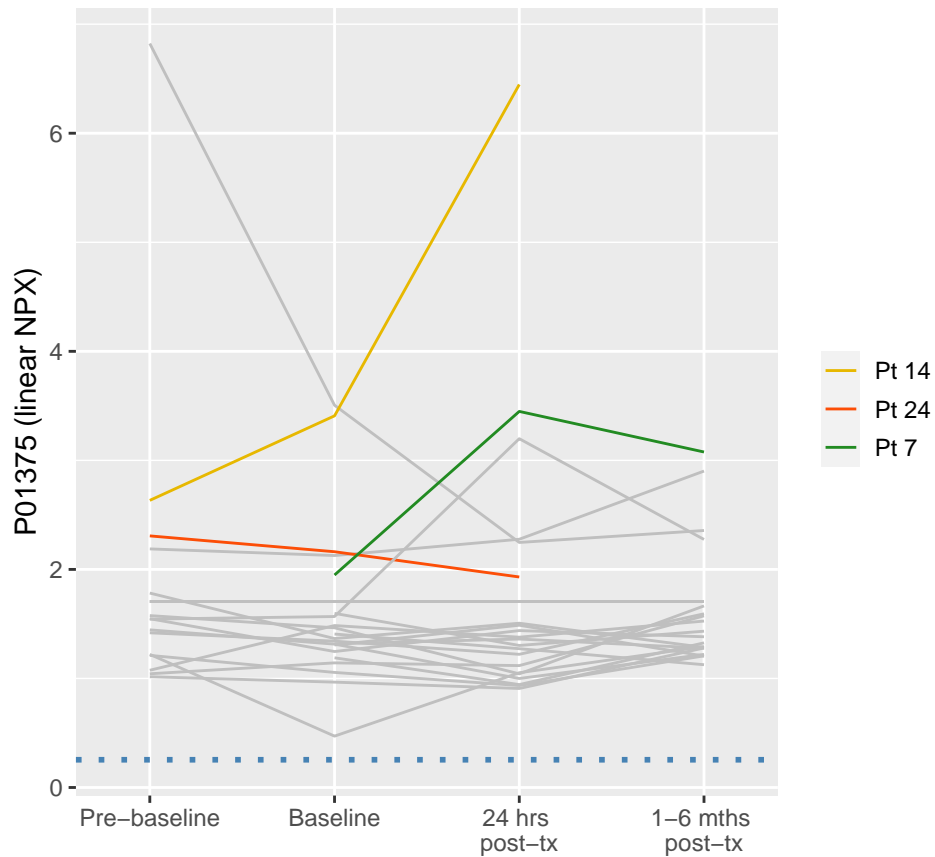

# Uniprot ID: Q13241, analyte:KLRD1

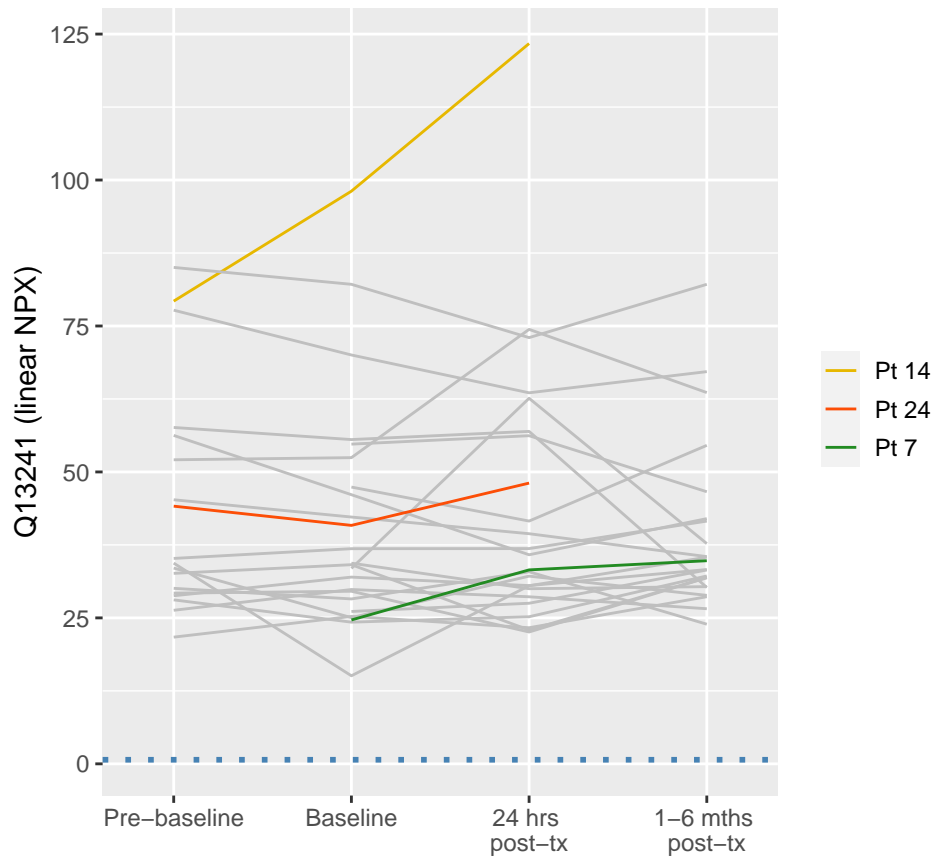

# Uniprot ID: P10144, analyte:GZMB

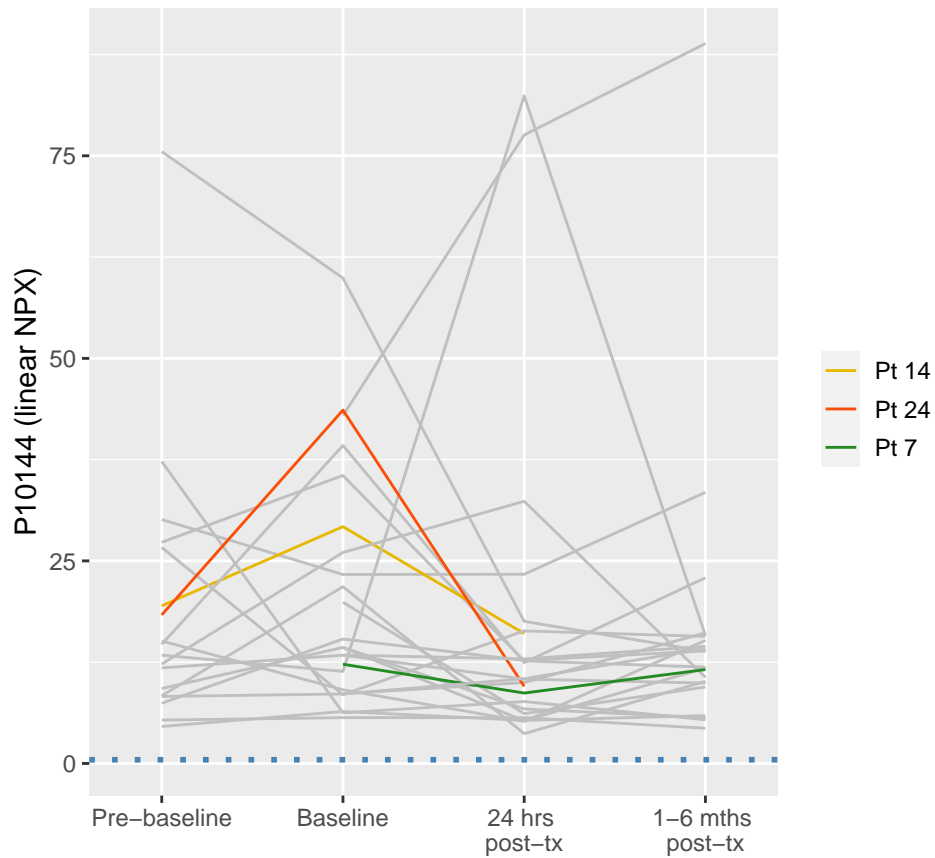

# Uniprot ID: Q01151, analyte:CD83

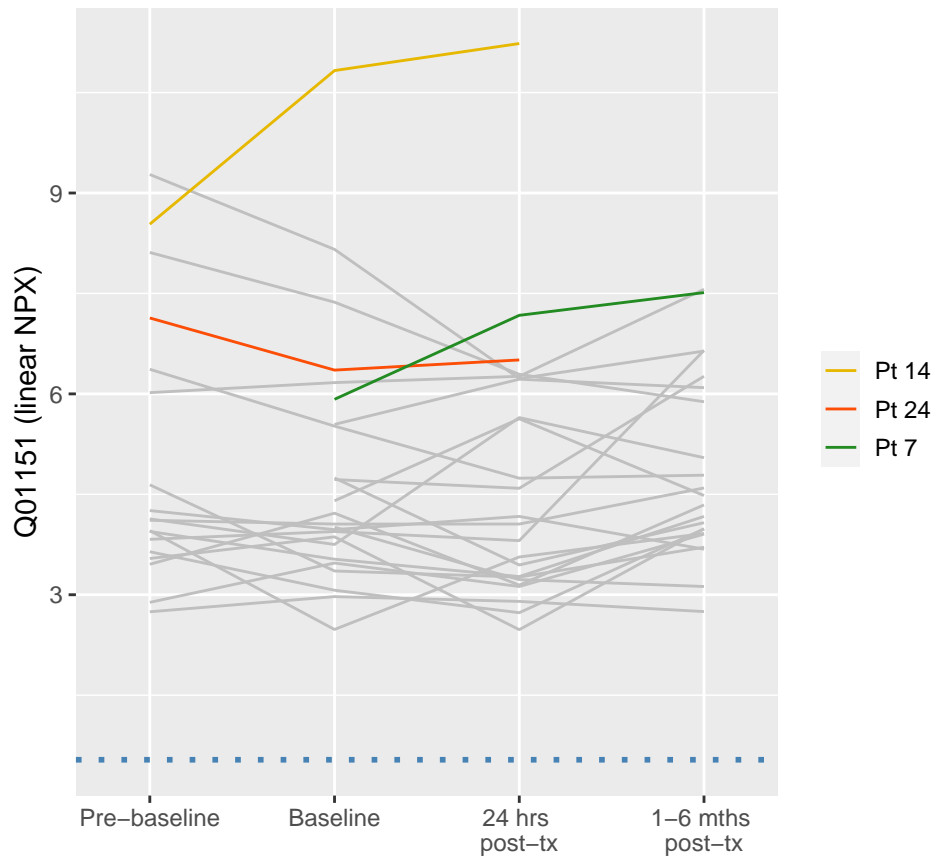

# Uniprot ID: P29459.P29460, analyte:IL12

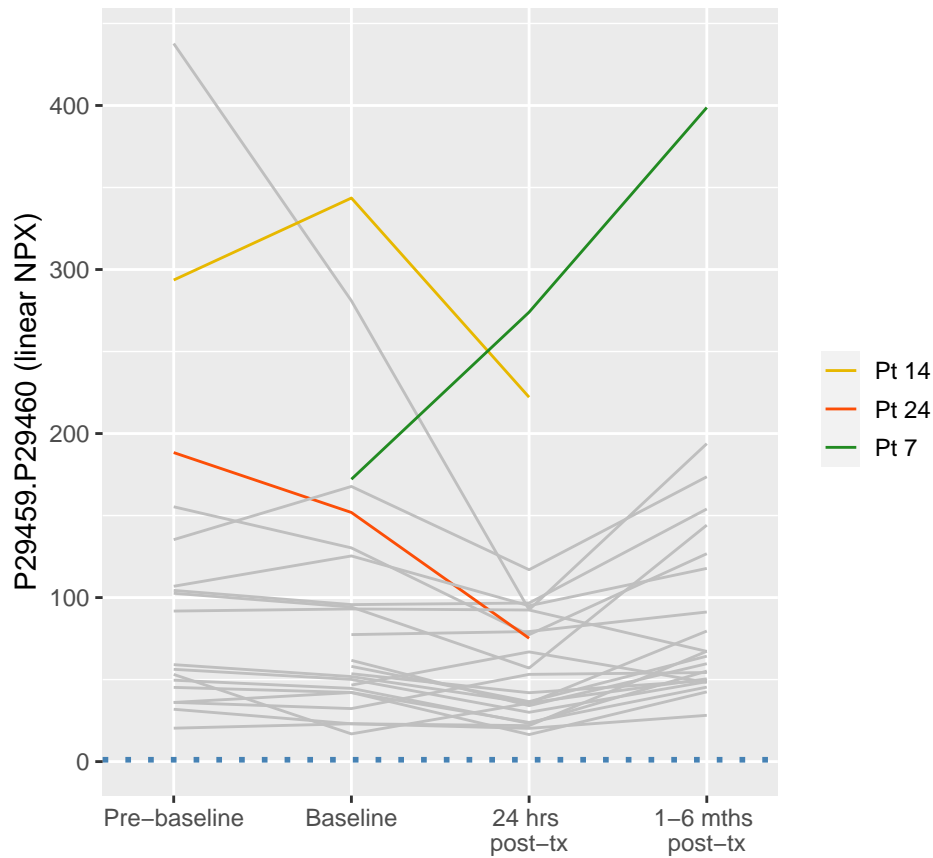

# Uniprot ID: P09603, analyte:CSF-1

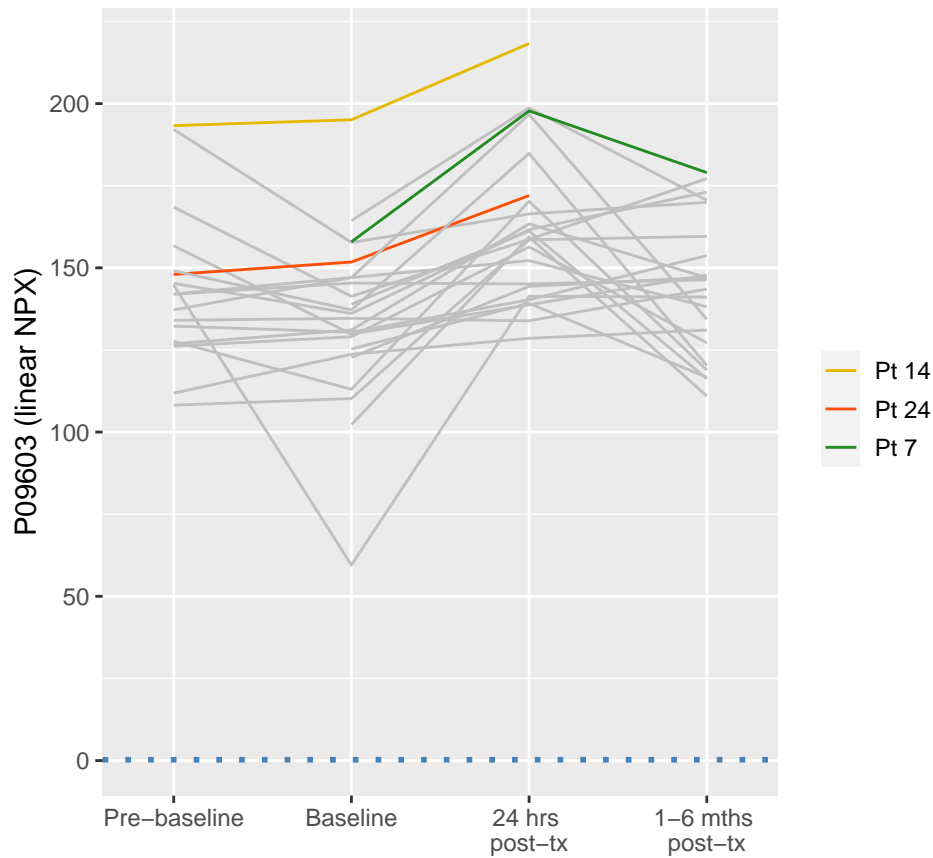

Supplement: s1 [file s1]
