# Supplementary material for: An Exploratory Analysis of Changes in Circulating Plasma Protein Profiles Following Image-Guided Ablation of Renal Tumours Provides Evidence for Effects on Multiple Biological Processes
Source: MDPI journal article supplement (doi:10.3390/cancers13236037), 2021-11-30

**Figure S3.** Longitudinal profiles of all plasma proteins on the Immunooncology panel, prior to and post-ablation. Results for each protein are expressed as a % of the reference baseline (TP2; 100%) and are shown for patients receiving CRYO (n=25), MWA (n=2) and RFA (n=8).

# Uniprot ID: P10145, analyte: IL8

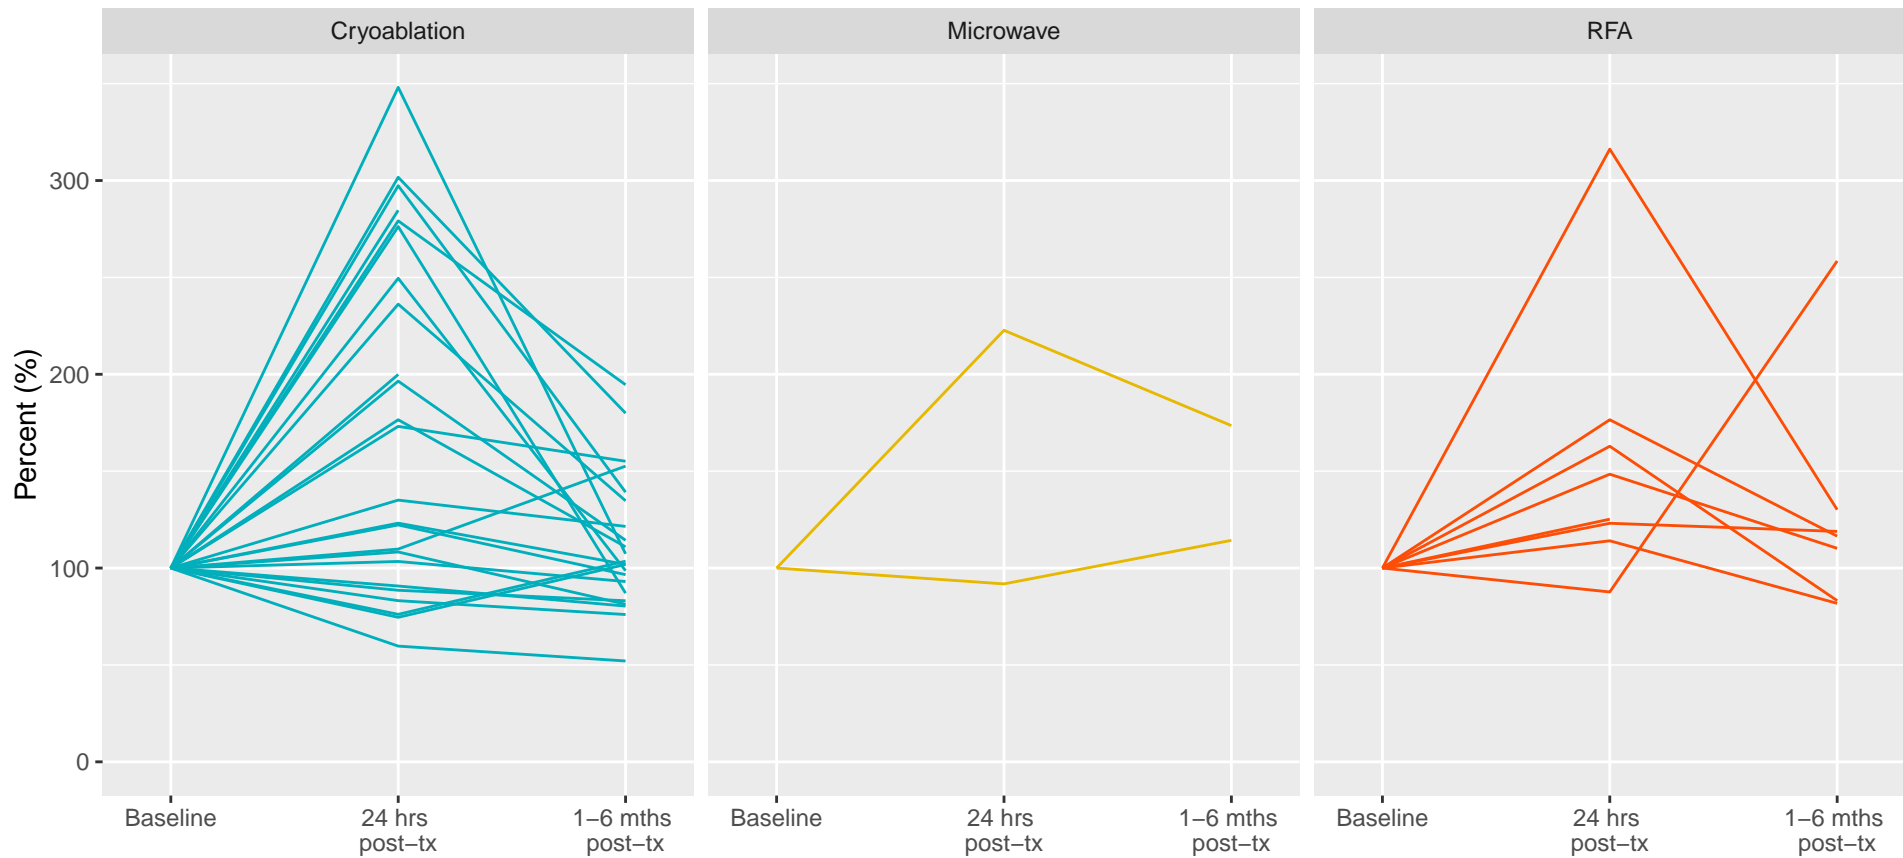

Uniprot ID: Q07011, analyte: TNFRSF9

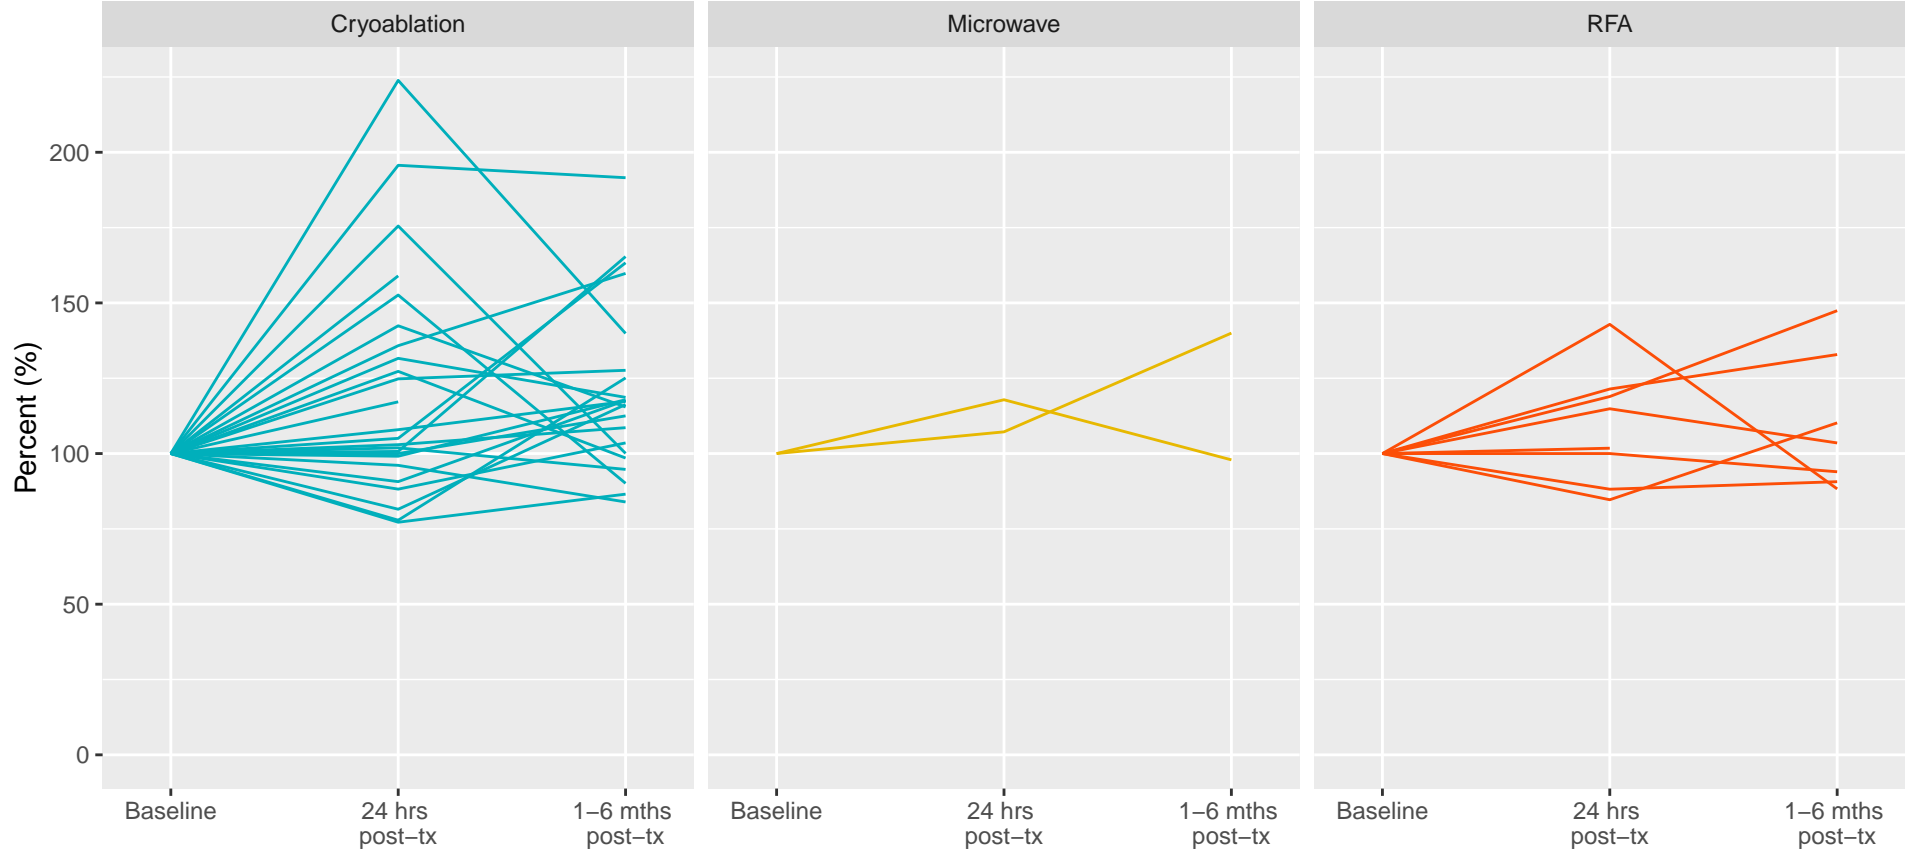

Uniprot ID: Q02763, analyte: TIE2

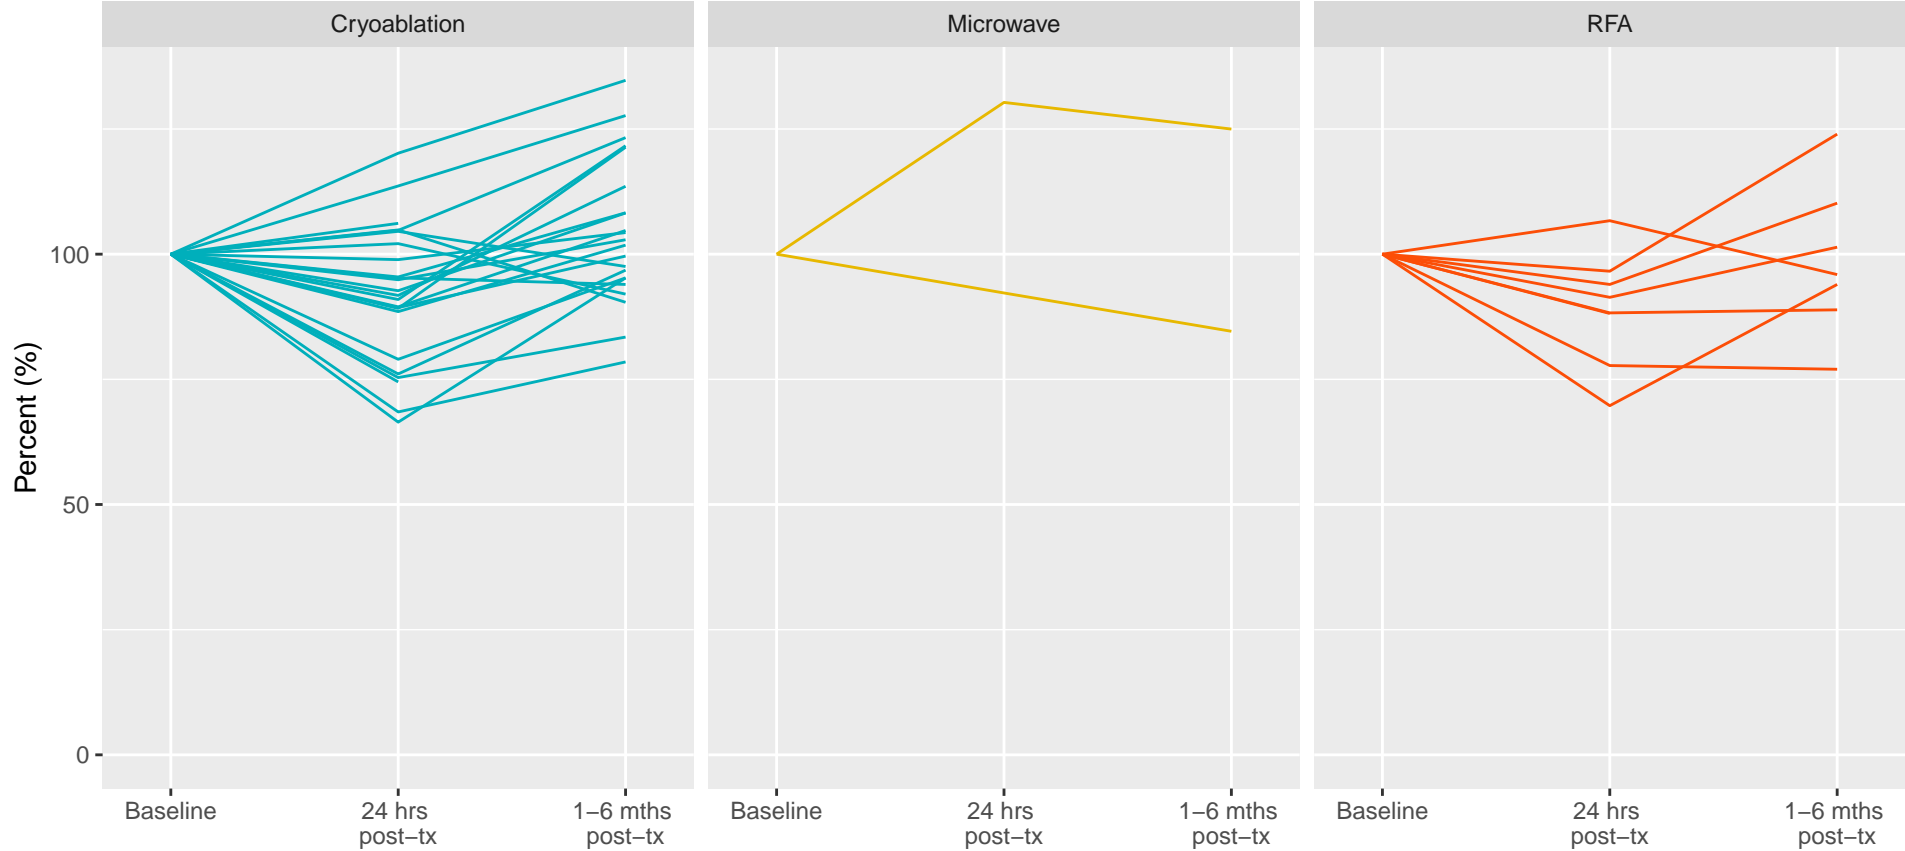

Uniprot ID: P80098, analyte: MCP-3

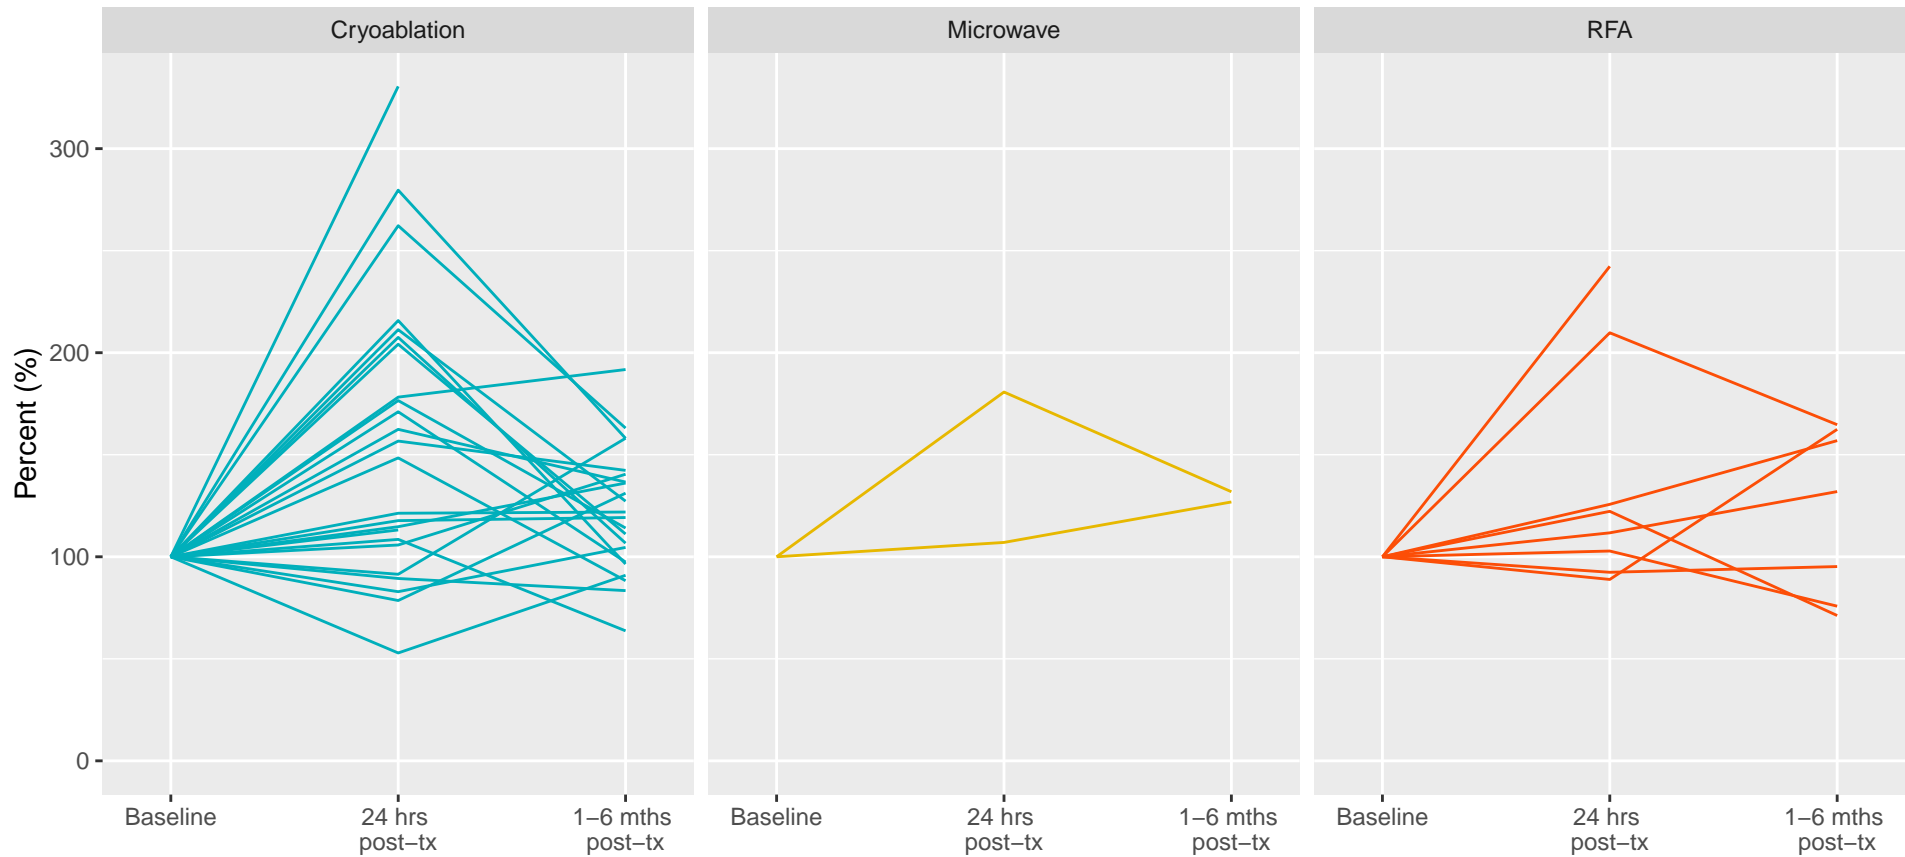

# Uniprot ID: P29965, analyte: CD40-L

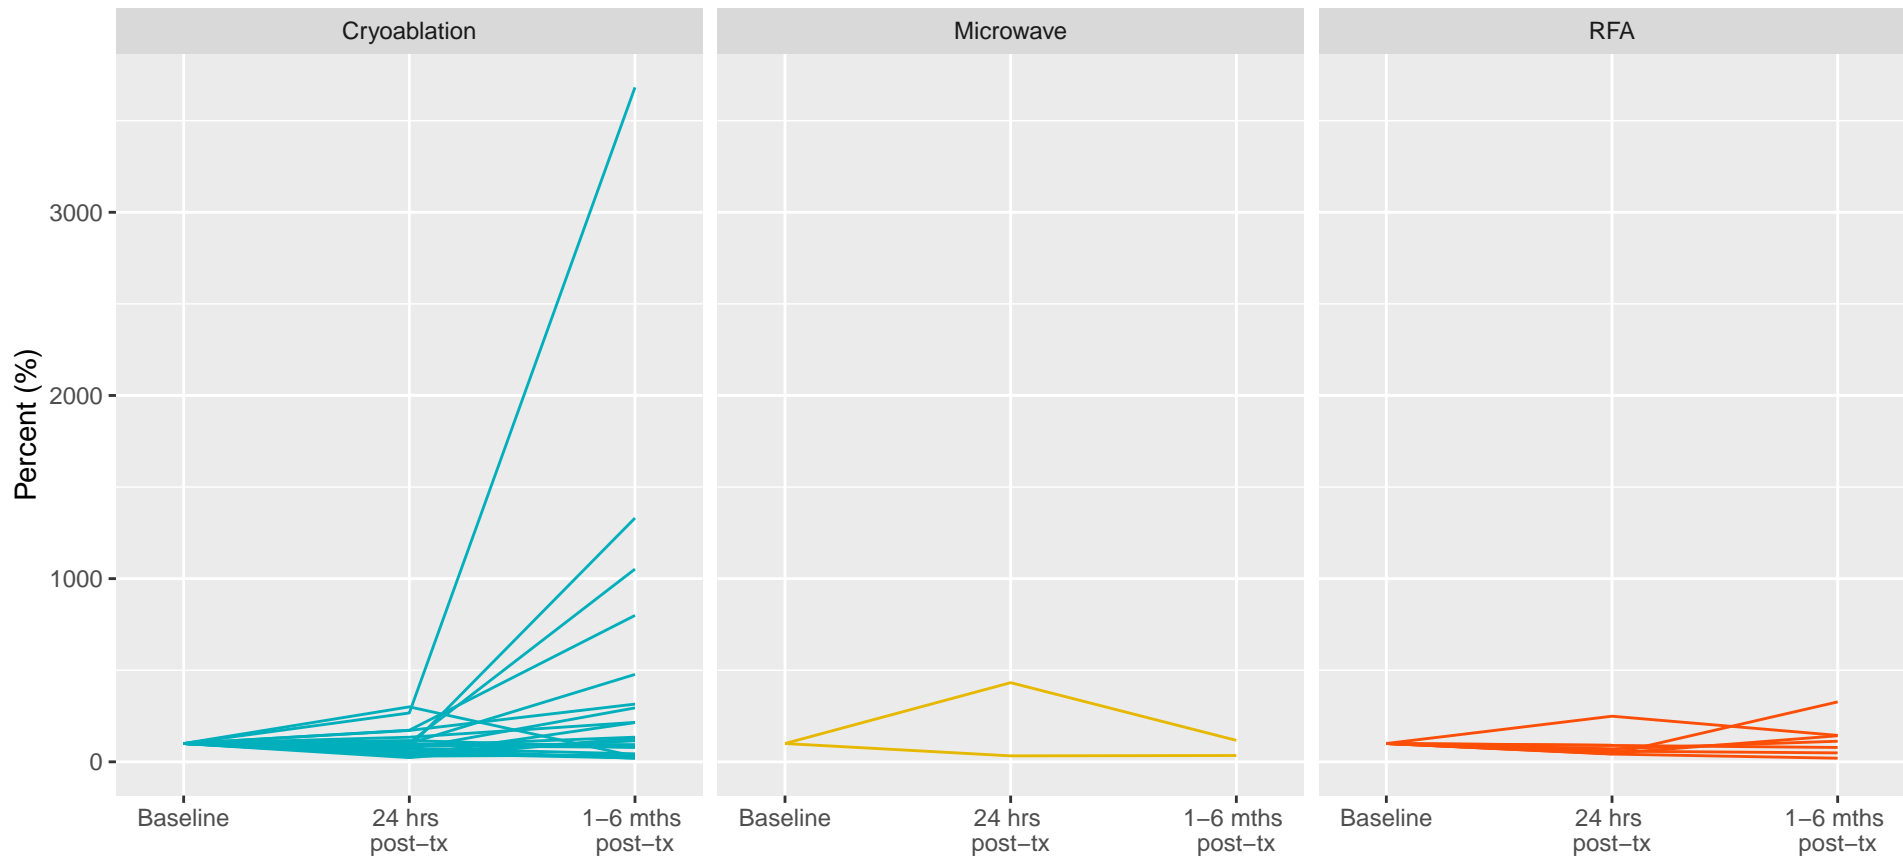

Uniprot ID: Q9BZW8, analyte: CD244

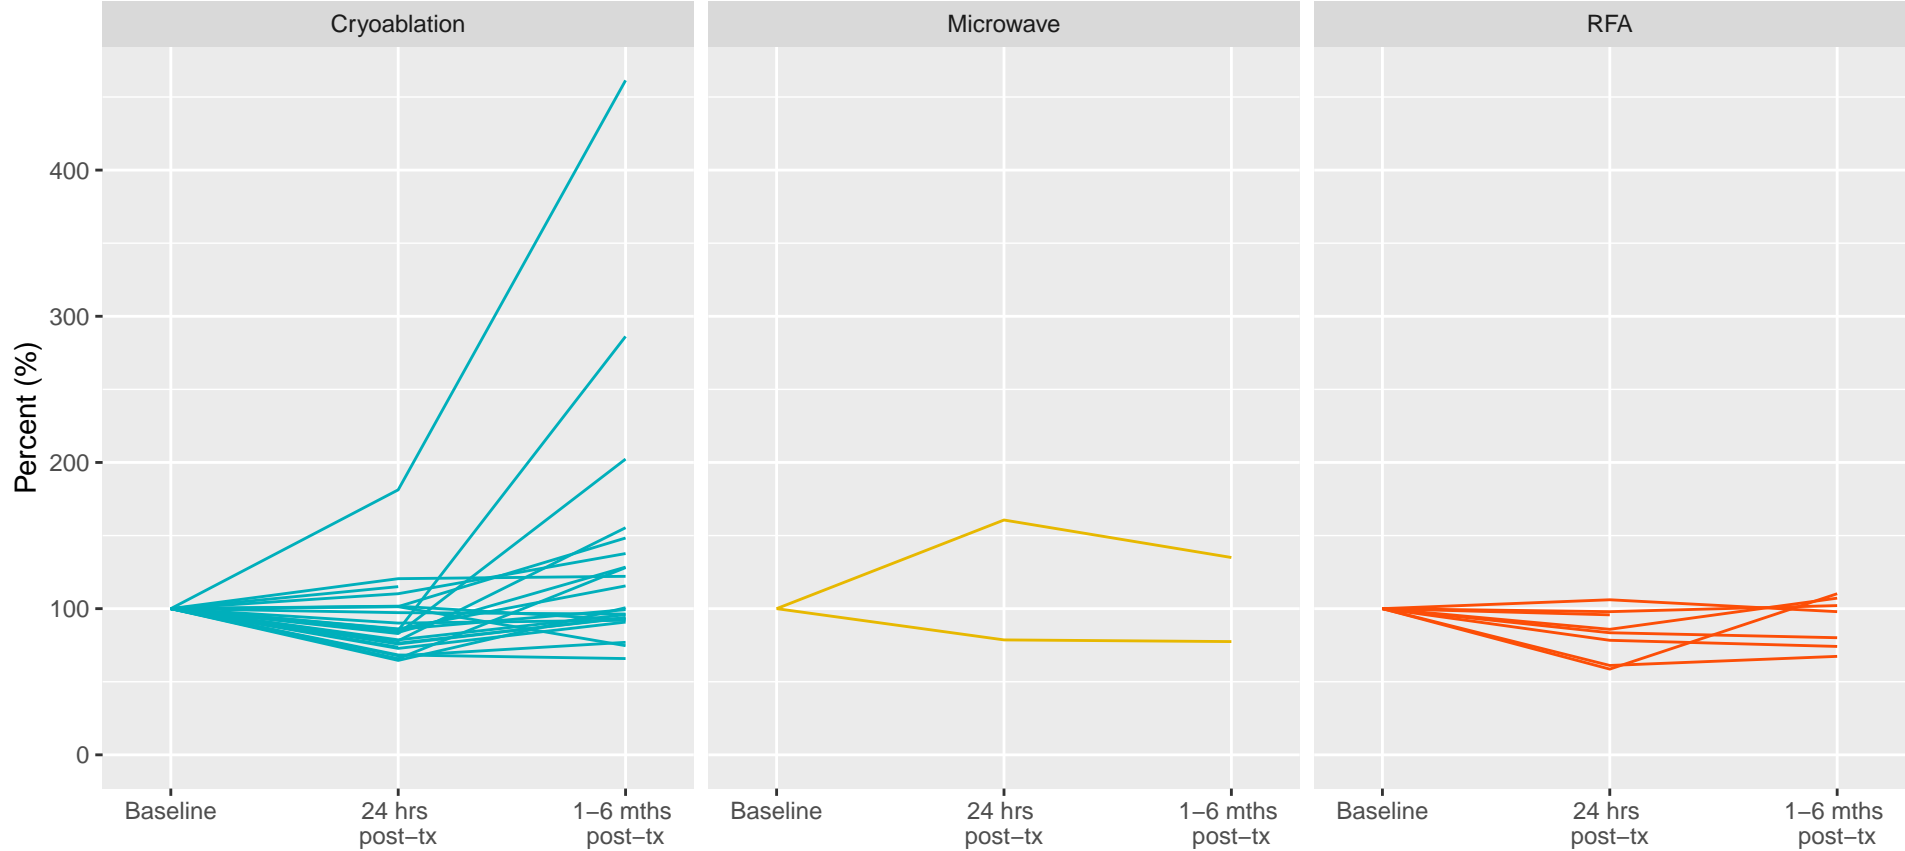

# Uniprot ID: P01133, analyte: EGF

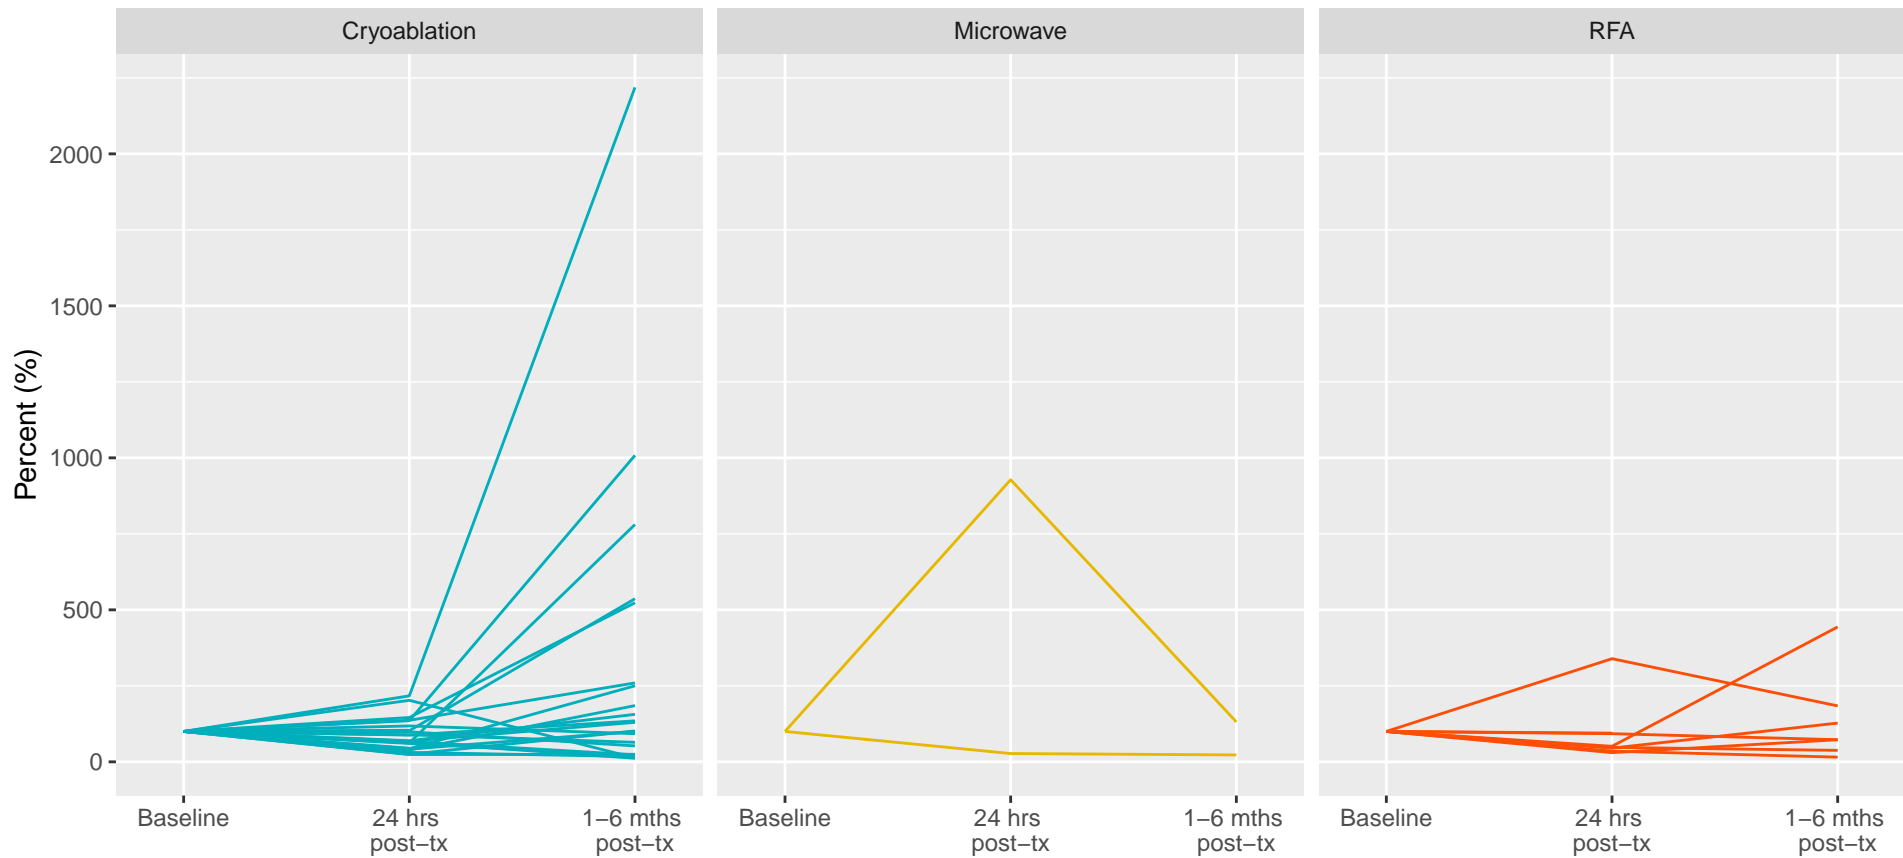



Uniprot ID: Q15389, analyte: ANGPT1

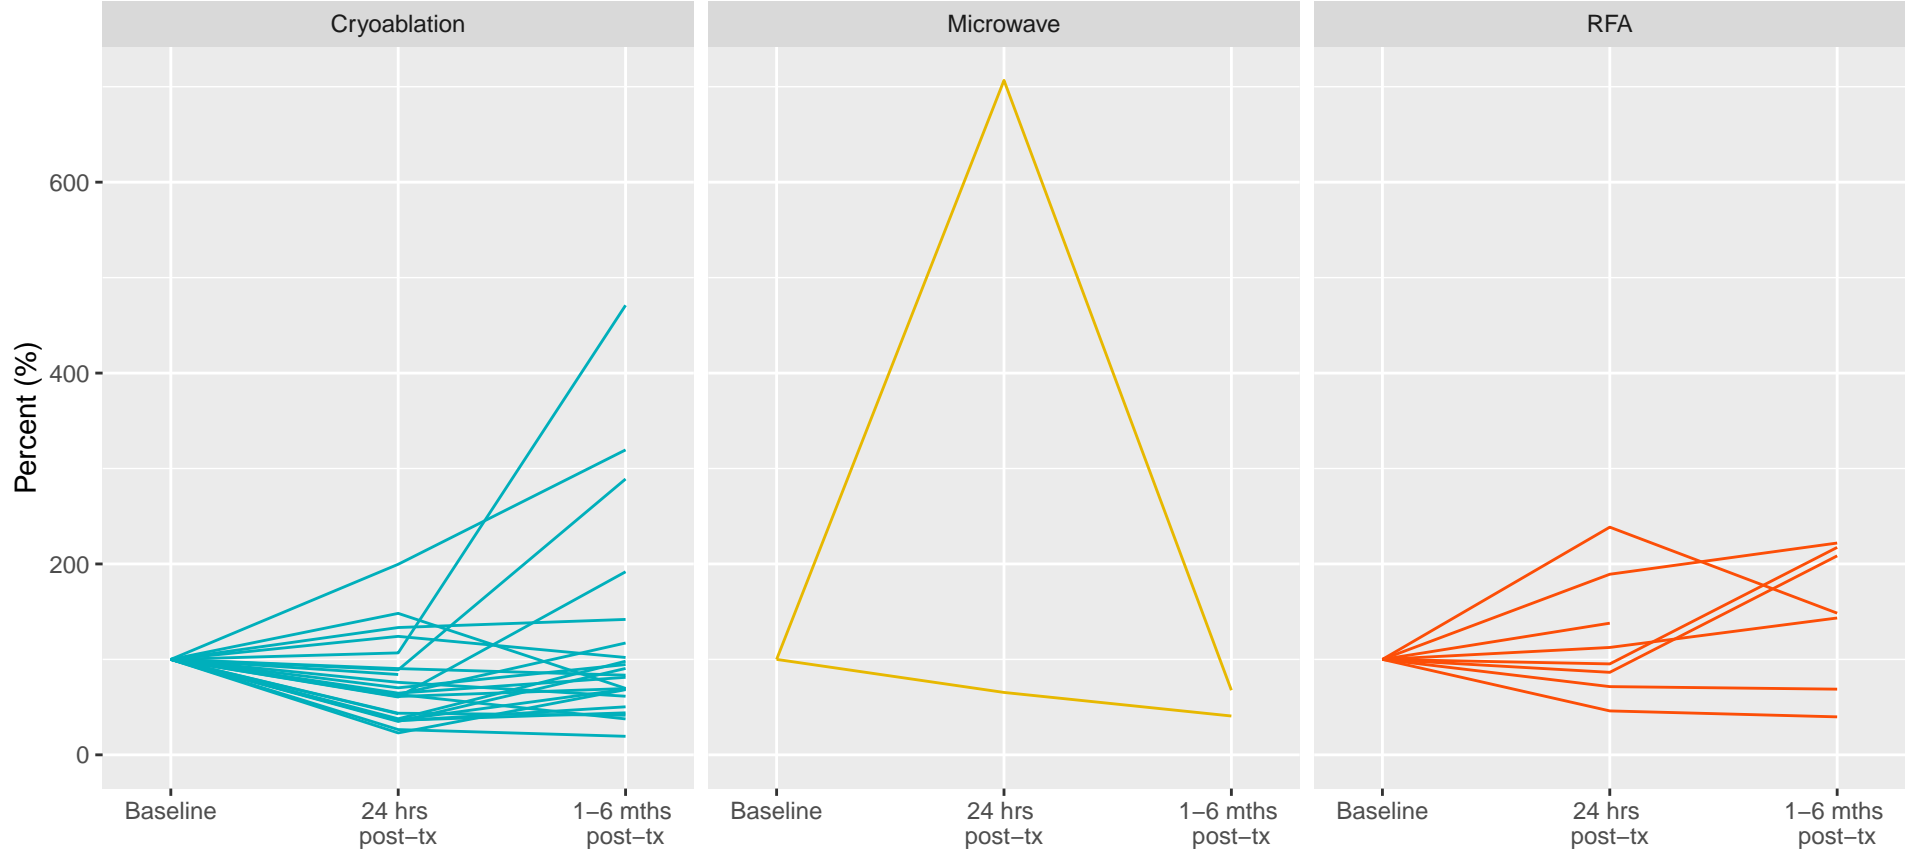

Uniprot ID: P13232, analyte: IL7

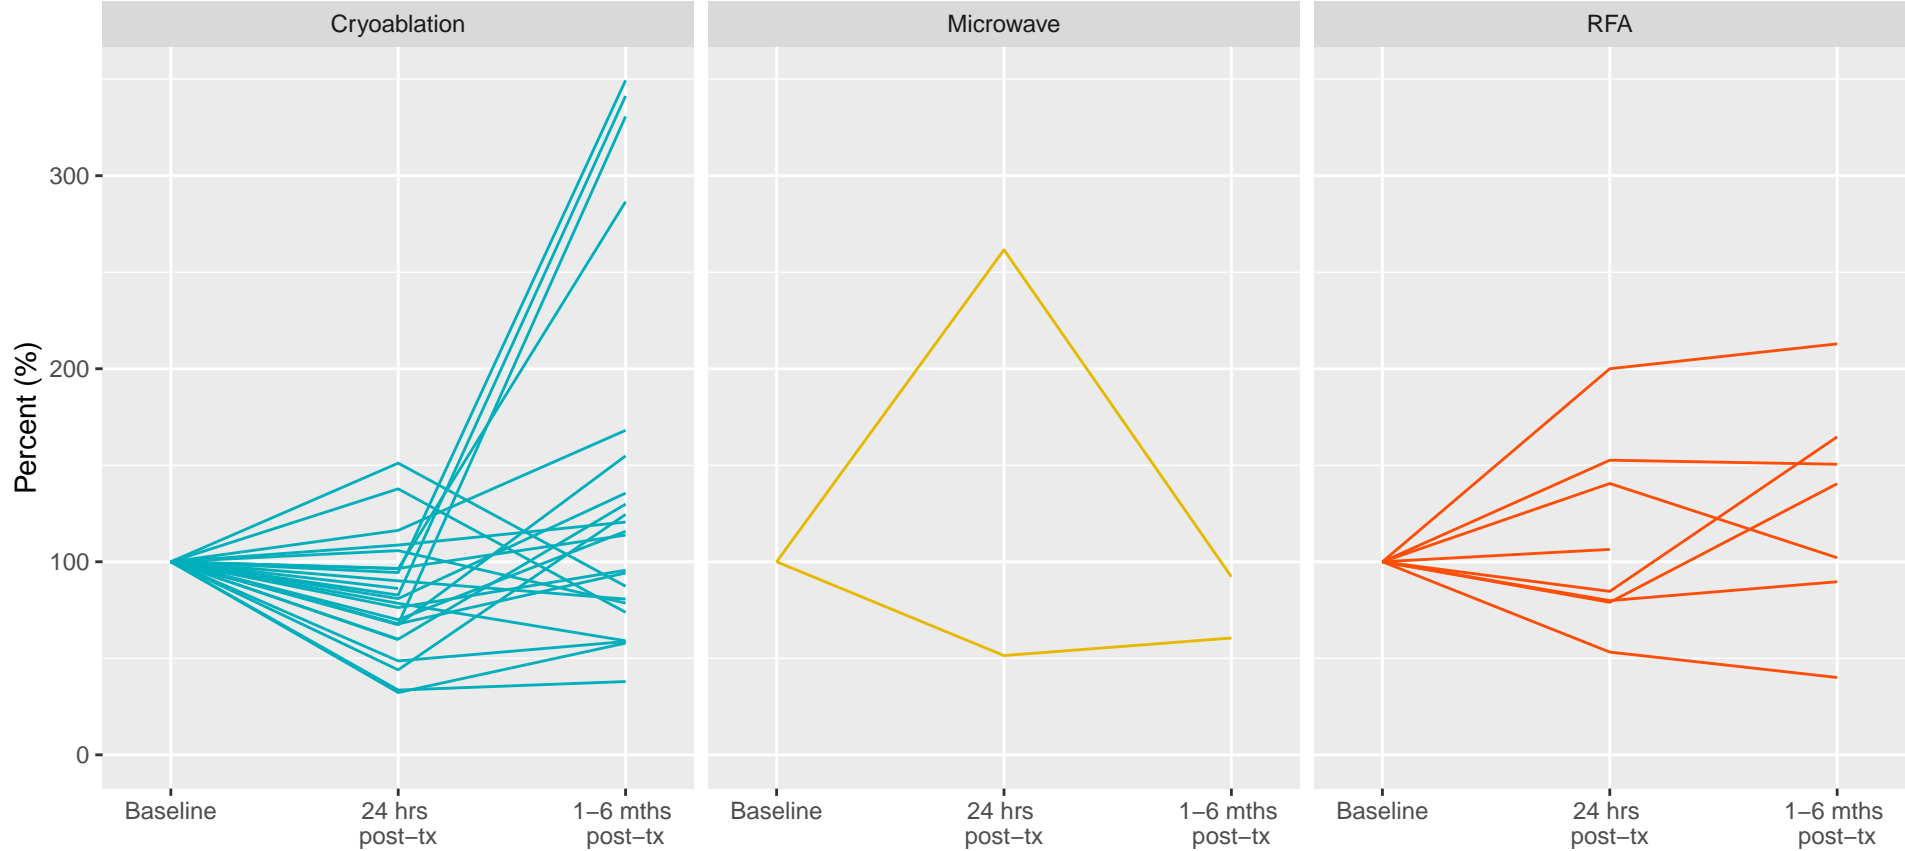

Uniprot ID: P49763, analyte: PGF

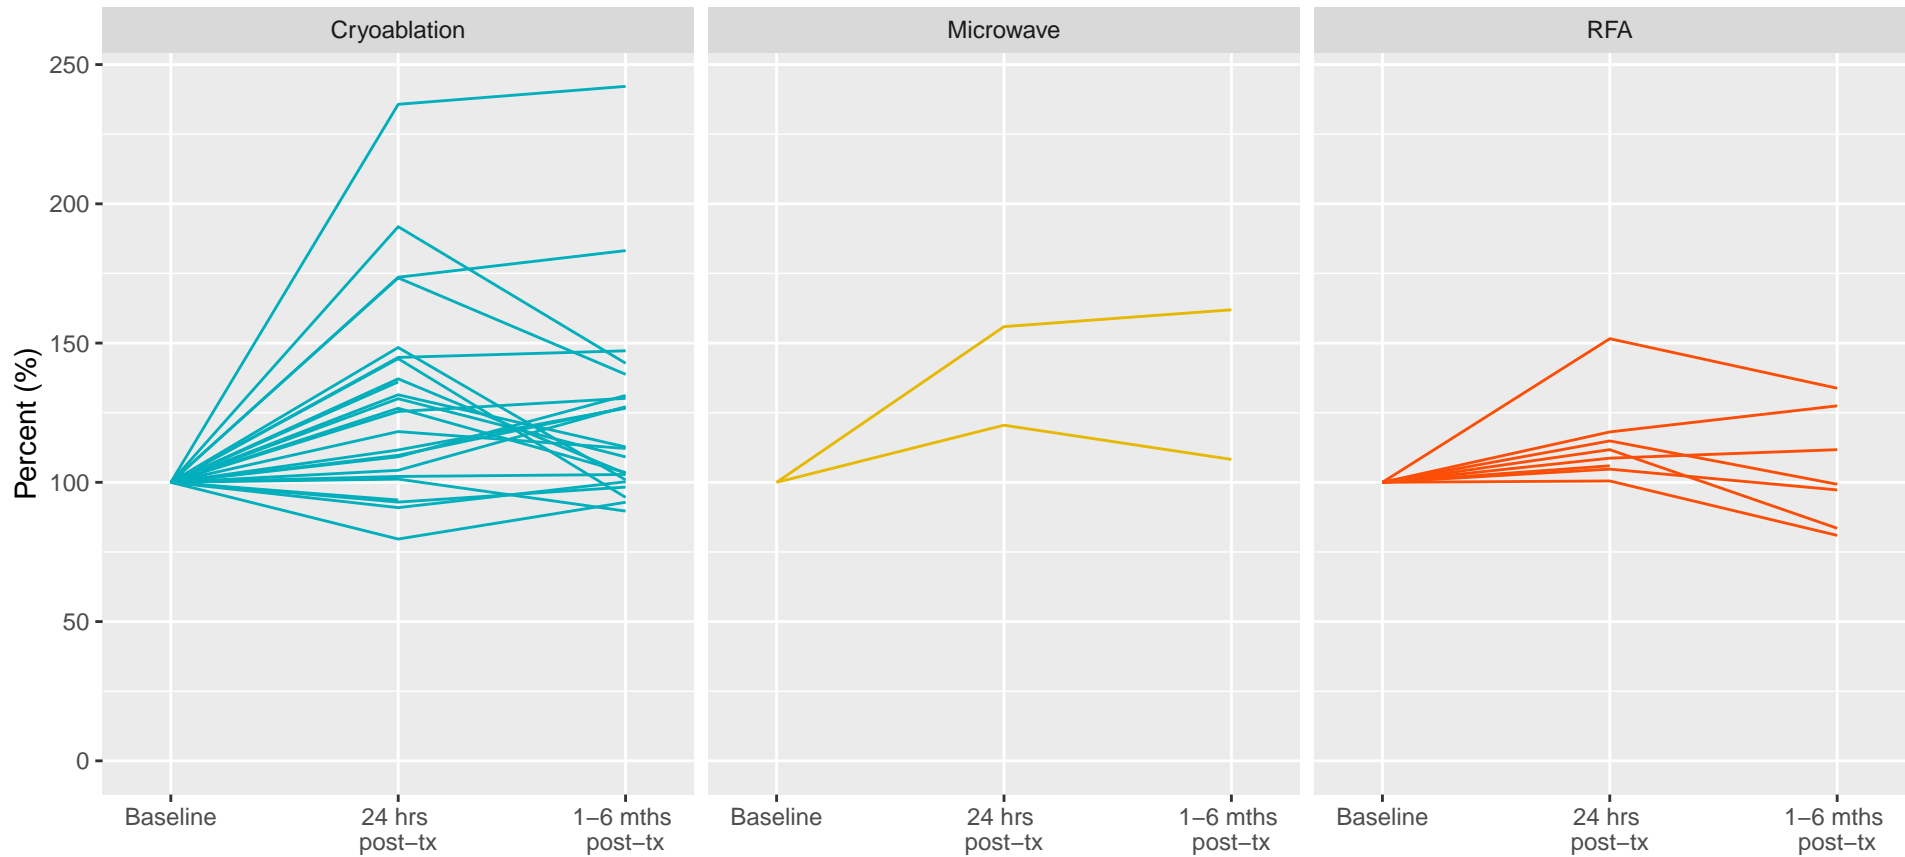

# Uniprot ID: P05231, analyte: IL6

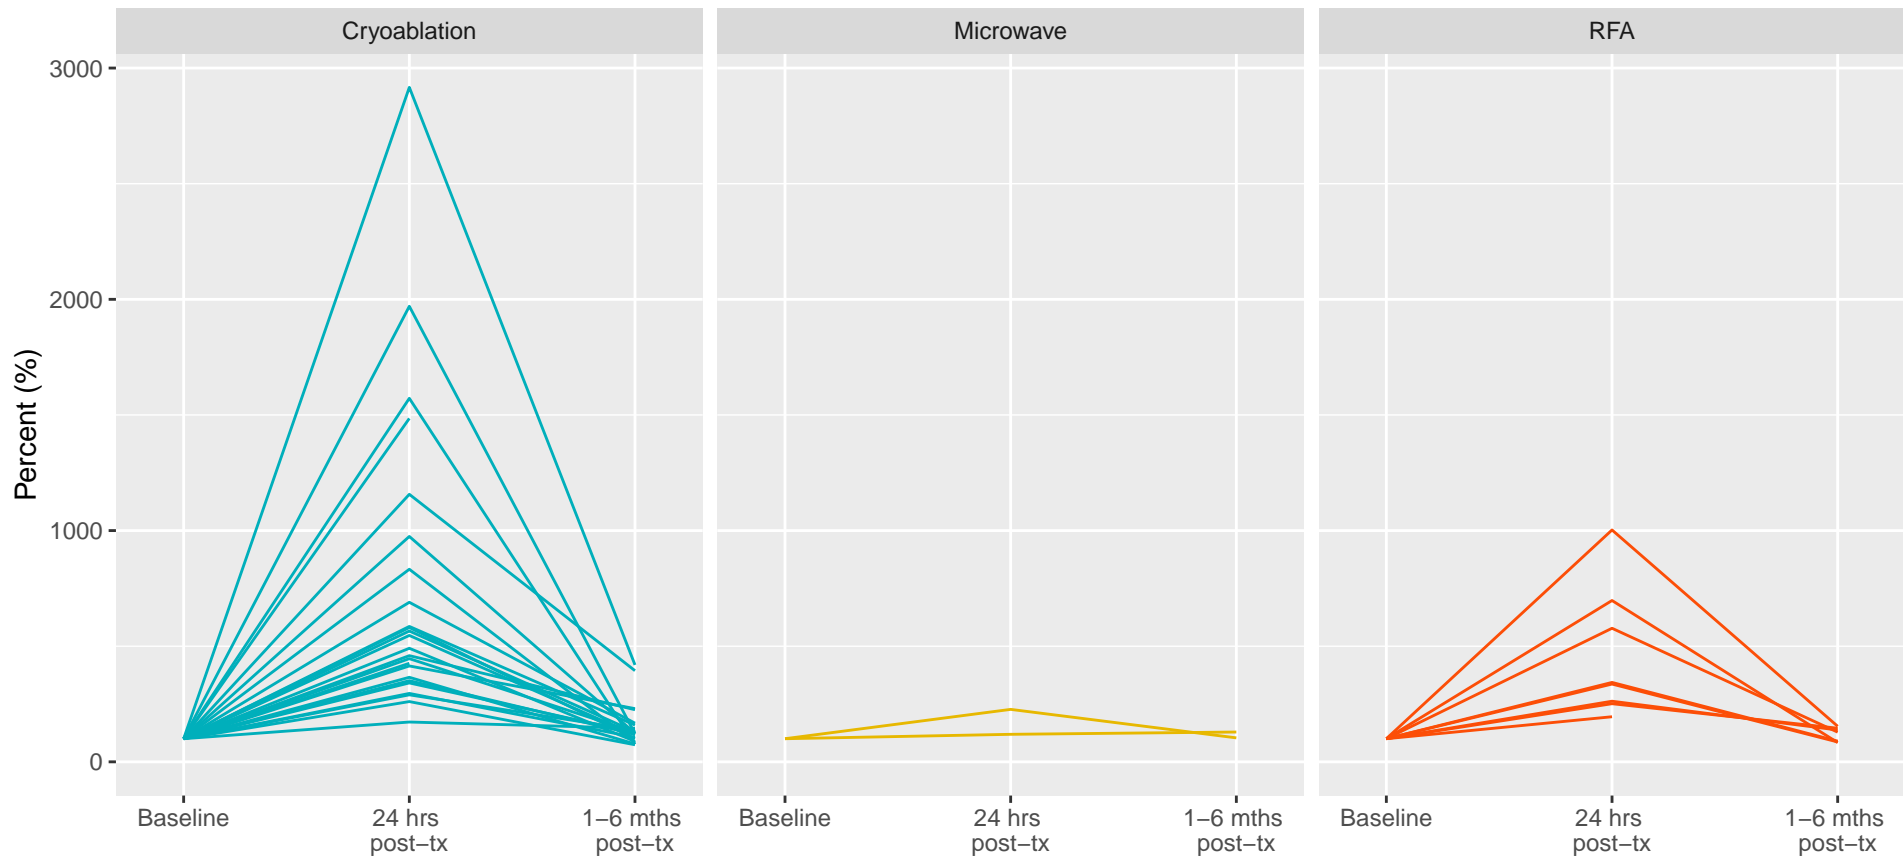

Uniprot ID: Q9Y653, analyte: ADGRG1

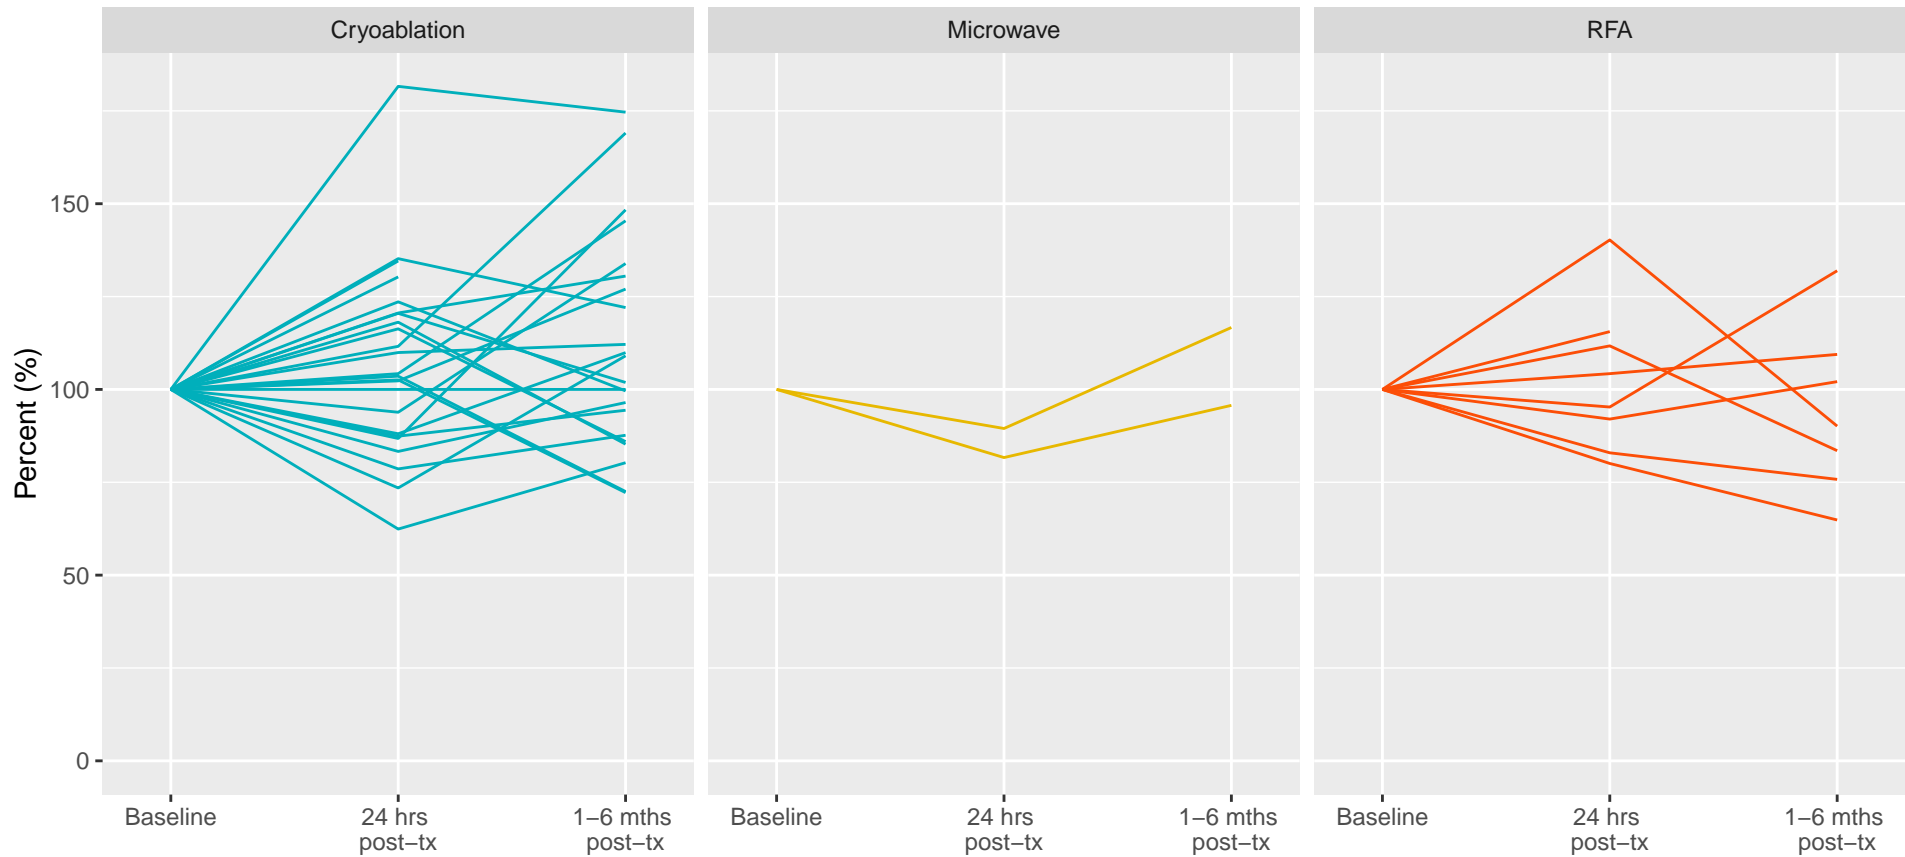



Uniprot ID: O95727, analyte: CRTAM

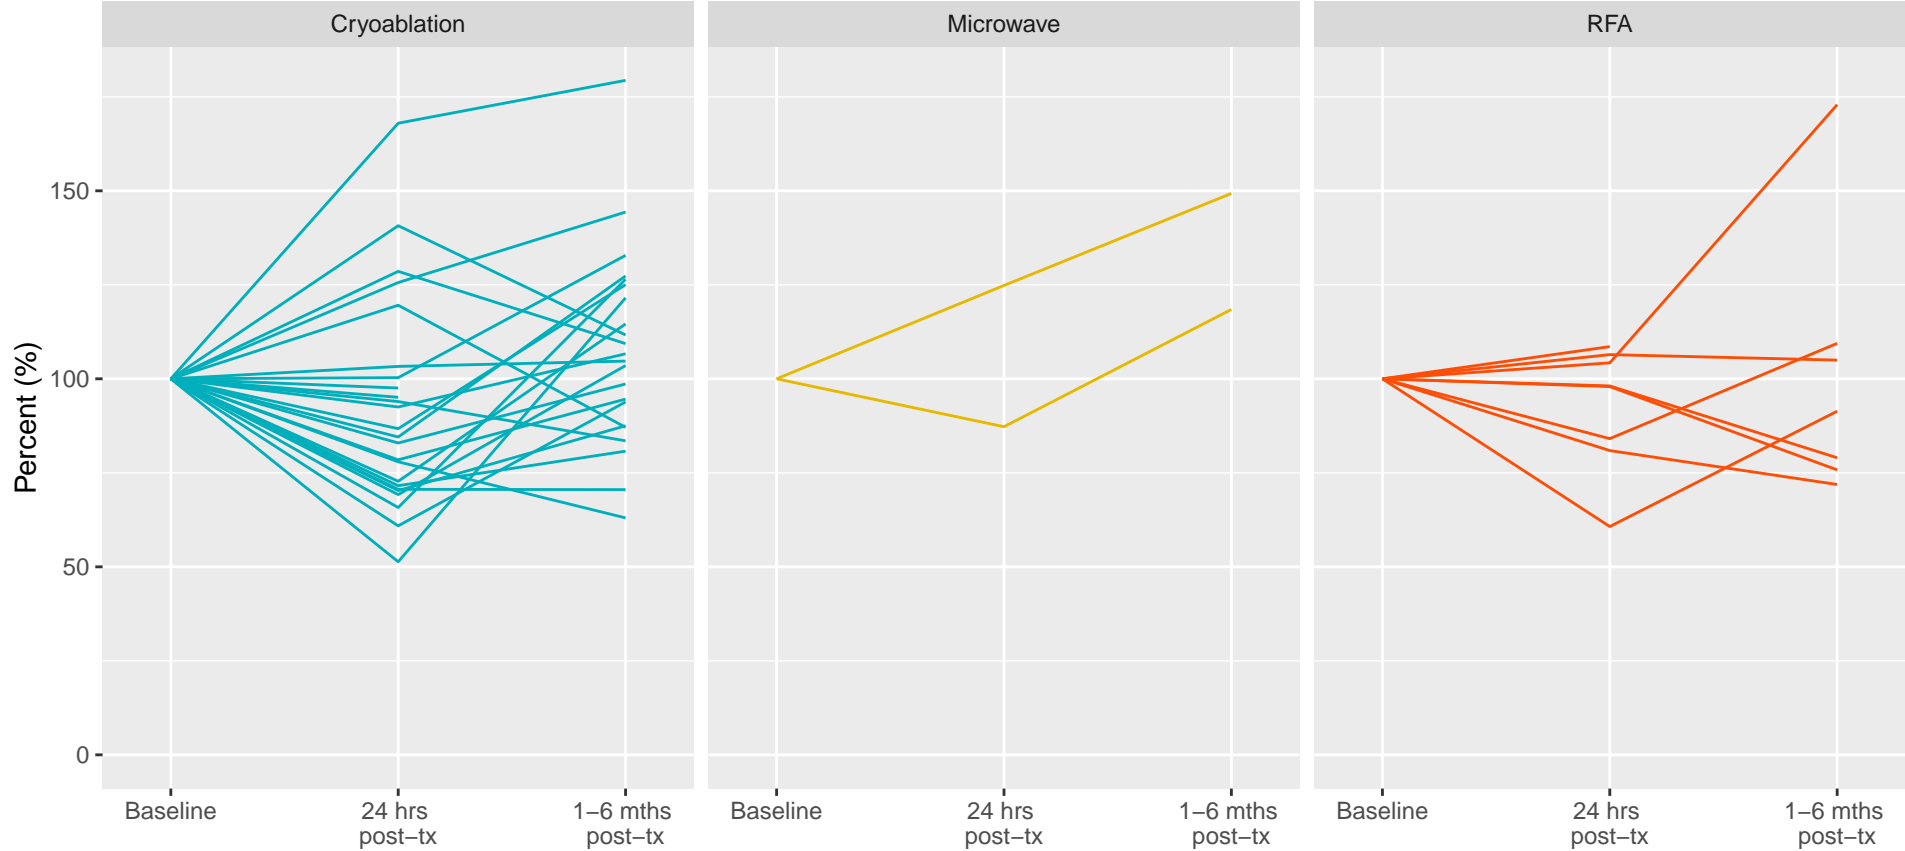

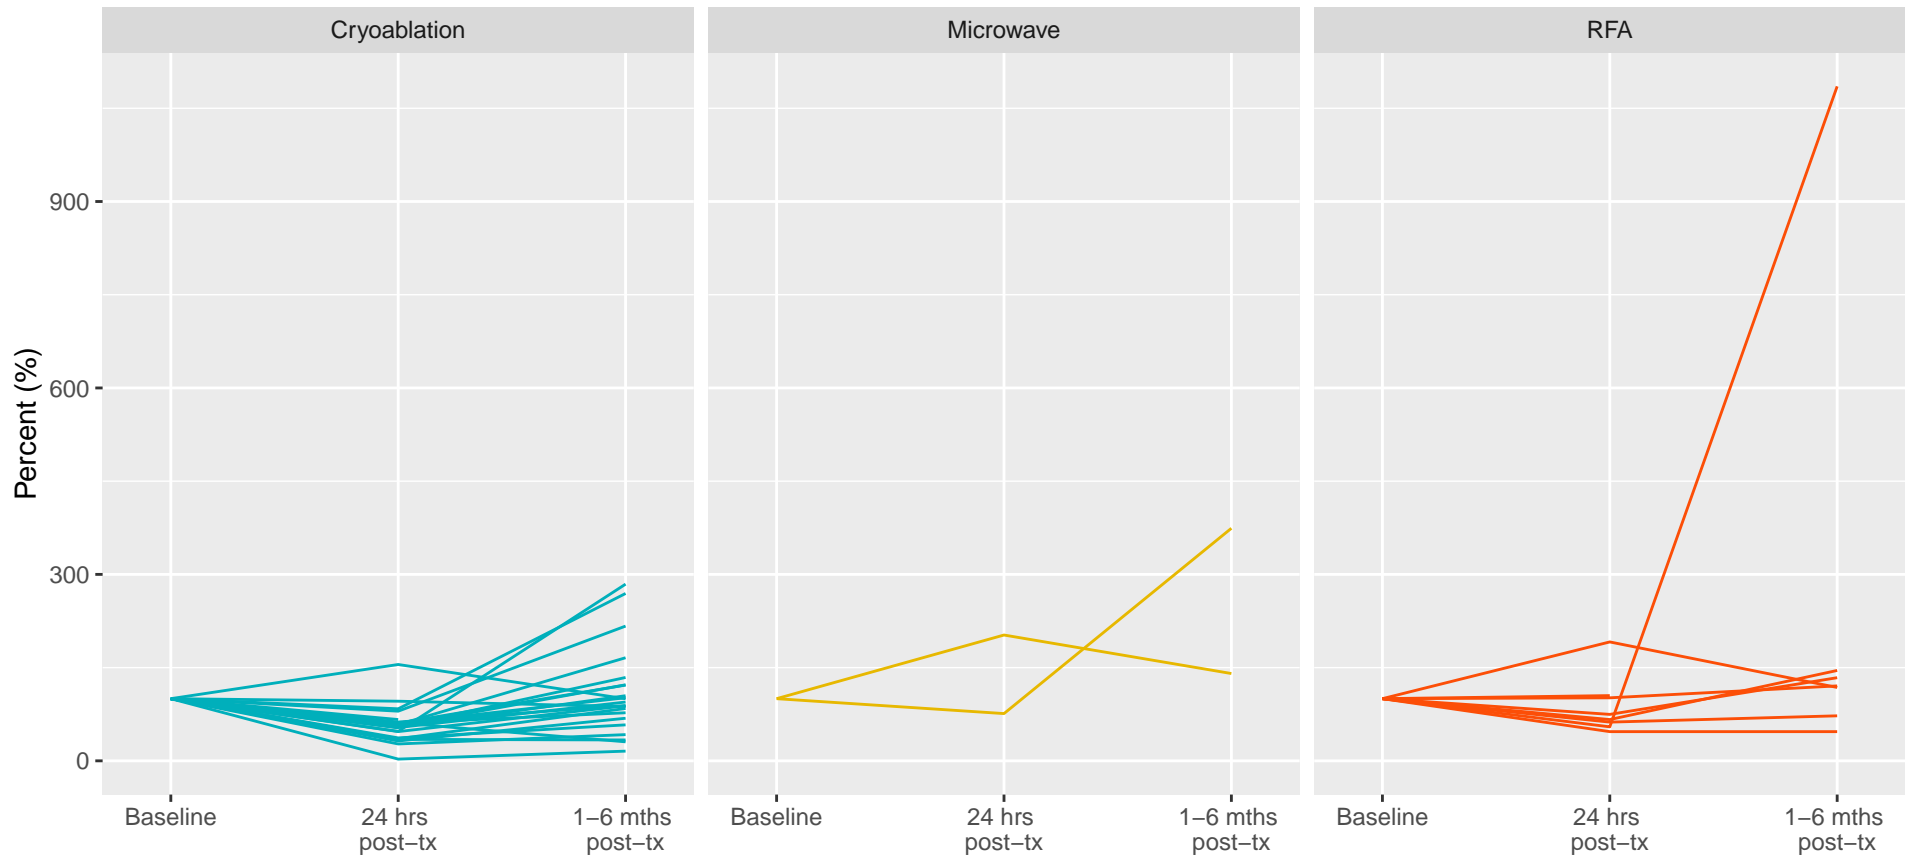



Uniprot ID: Q99616, analyte: MCP-4

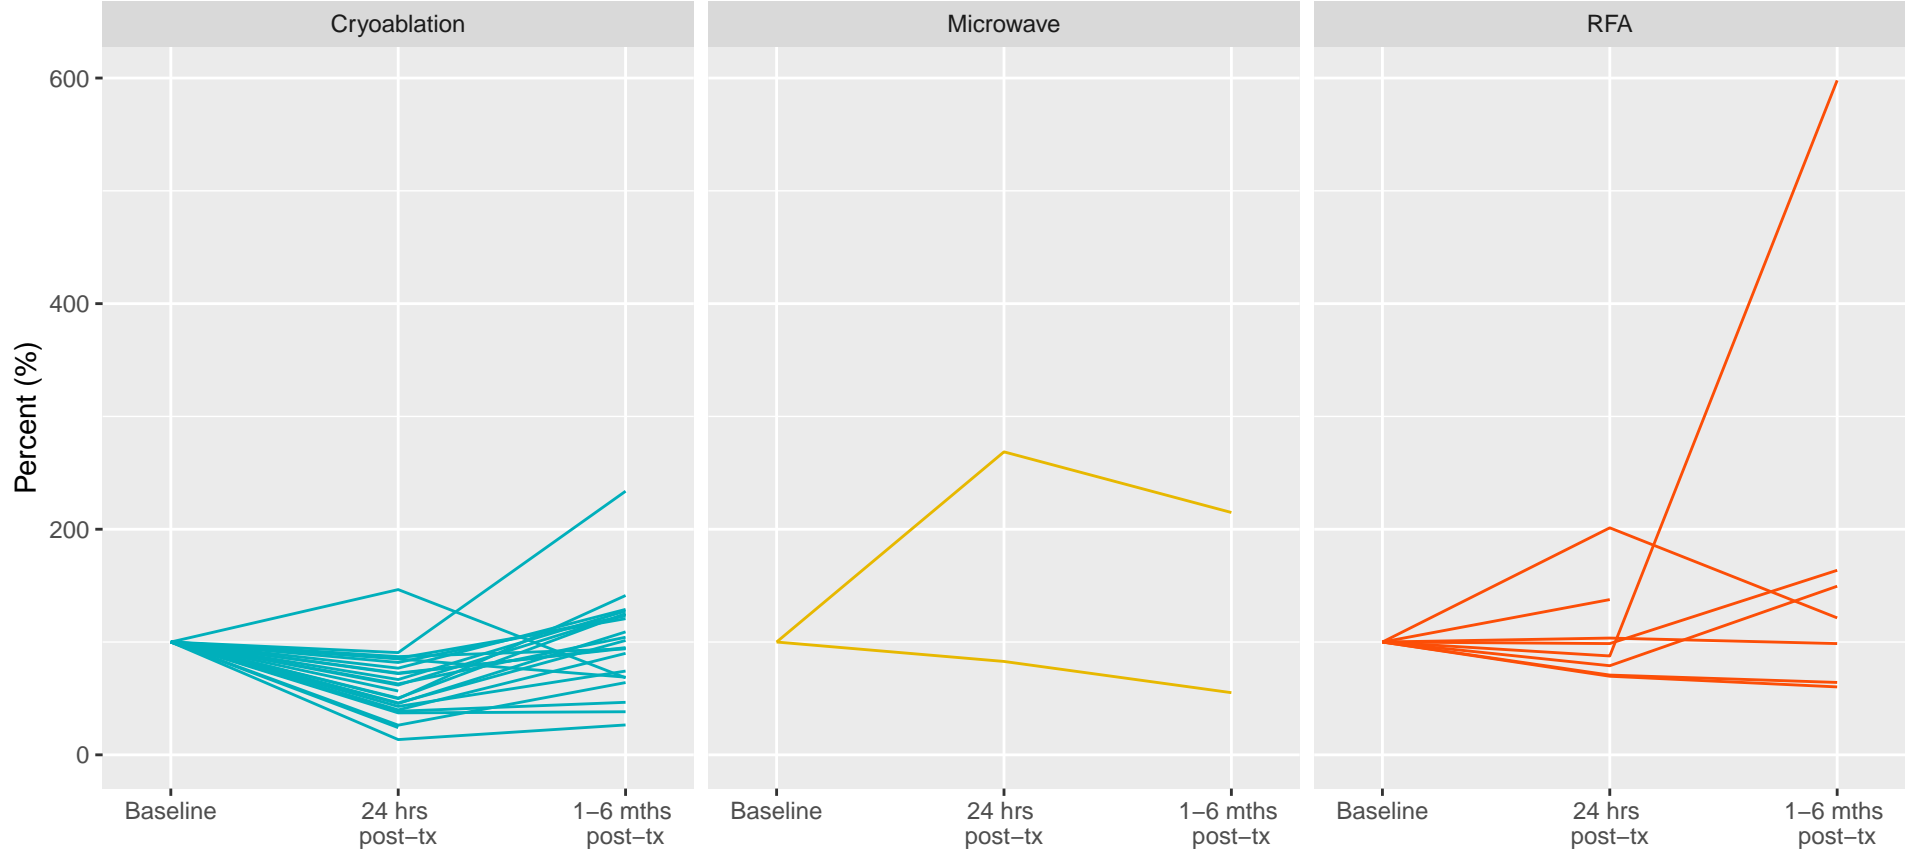

Uniprot ID: P50591, analyte: TRAIL

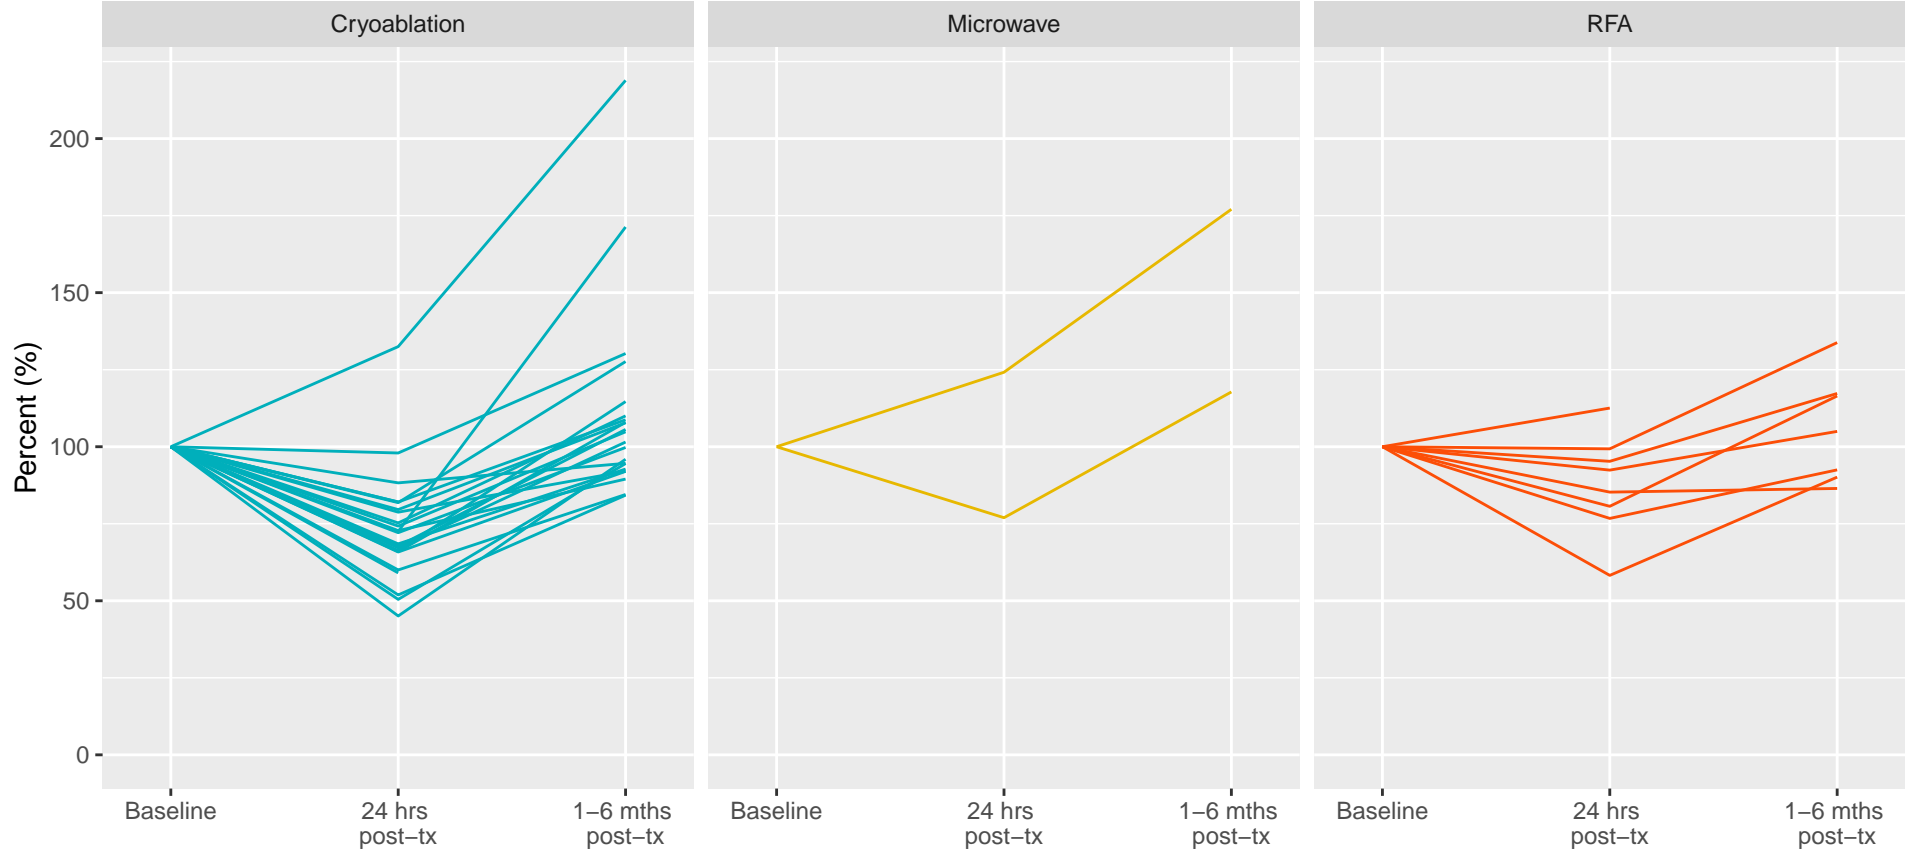

## Uniprot ID: P09038, analyte: FGF2

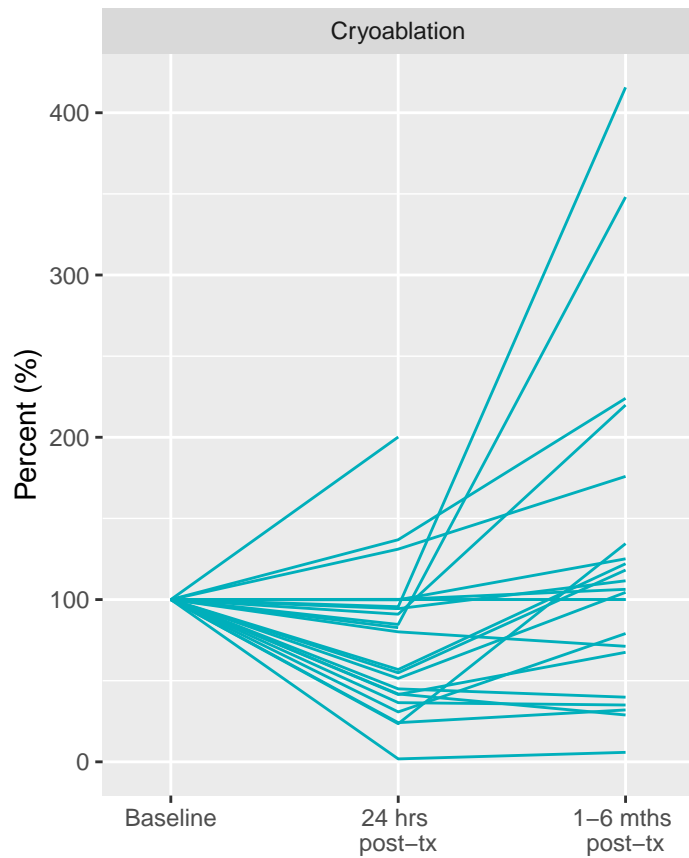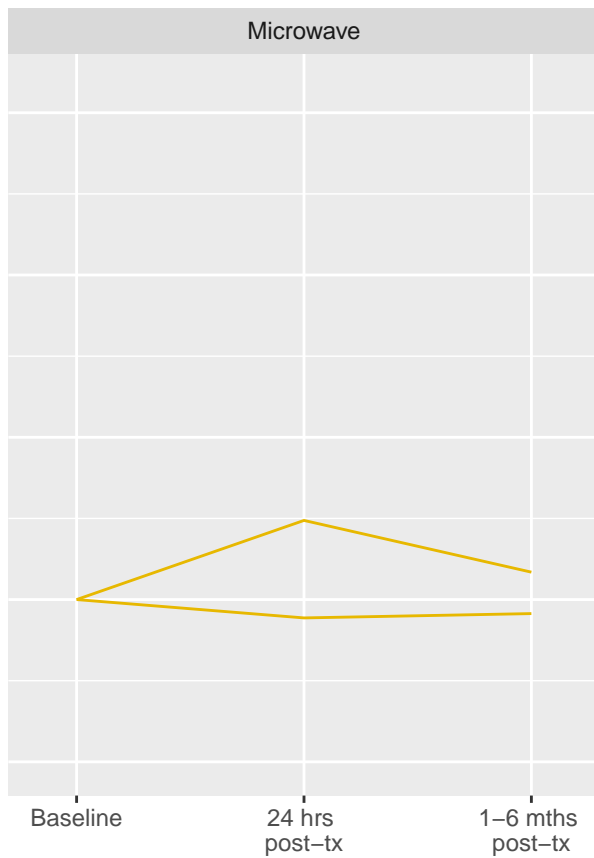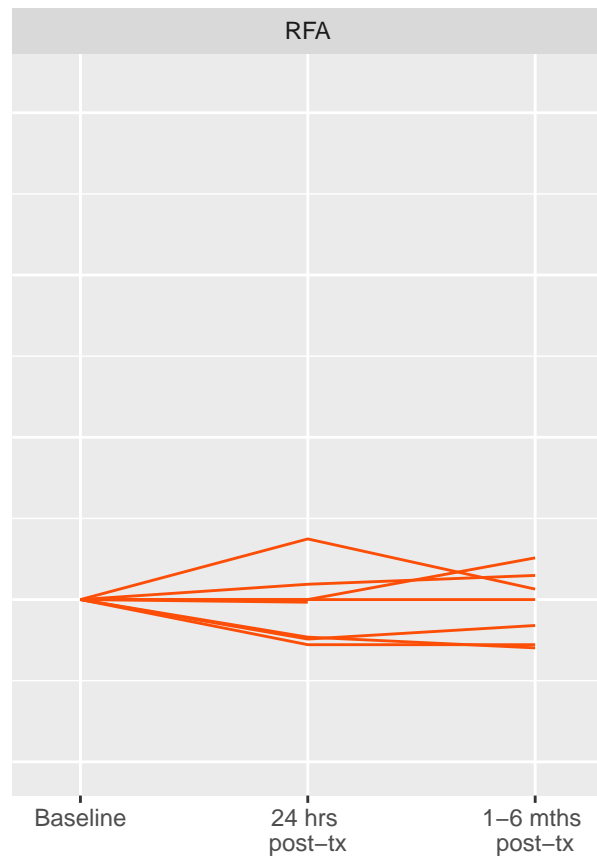

# Uniprot ID: Q07325, analyte: CXCL9

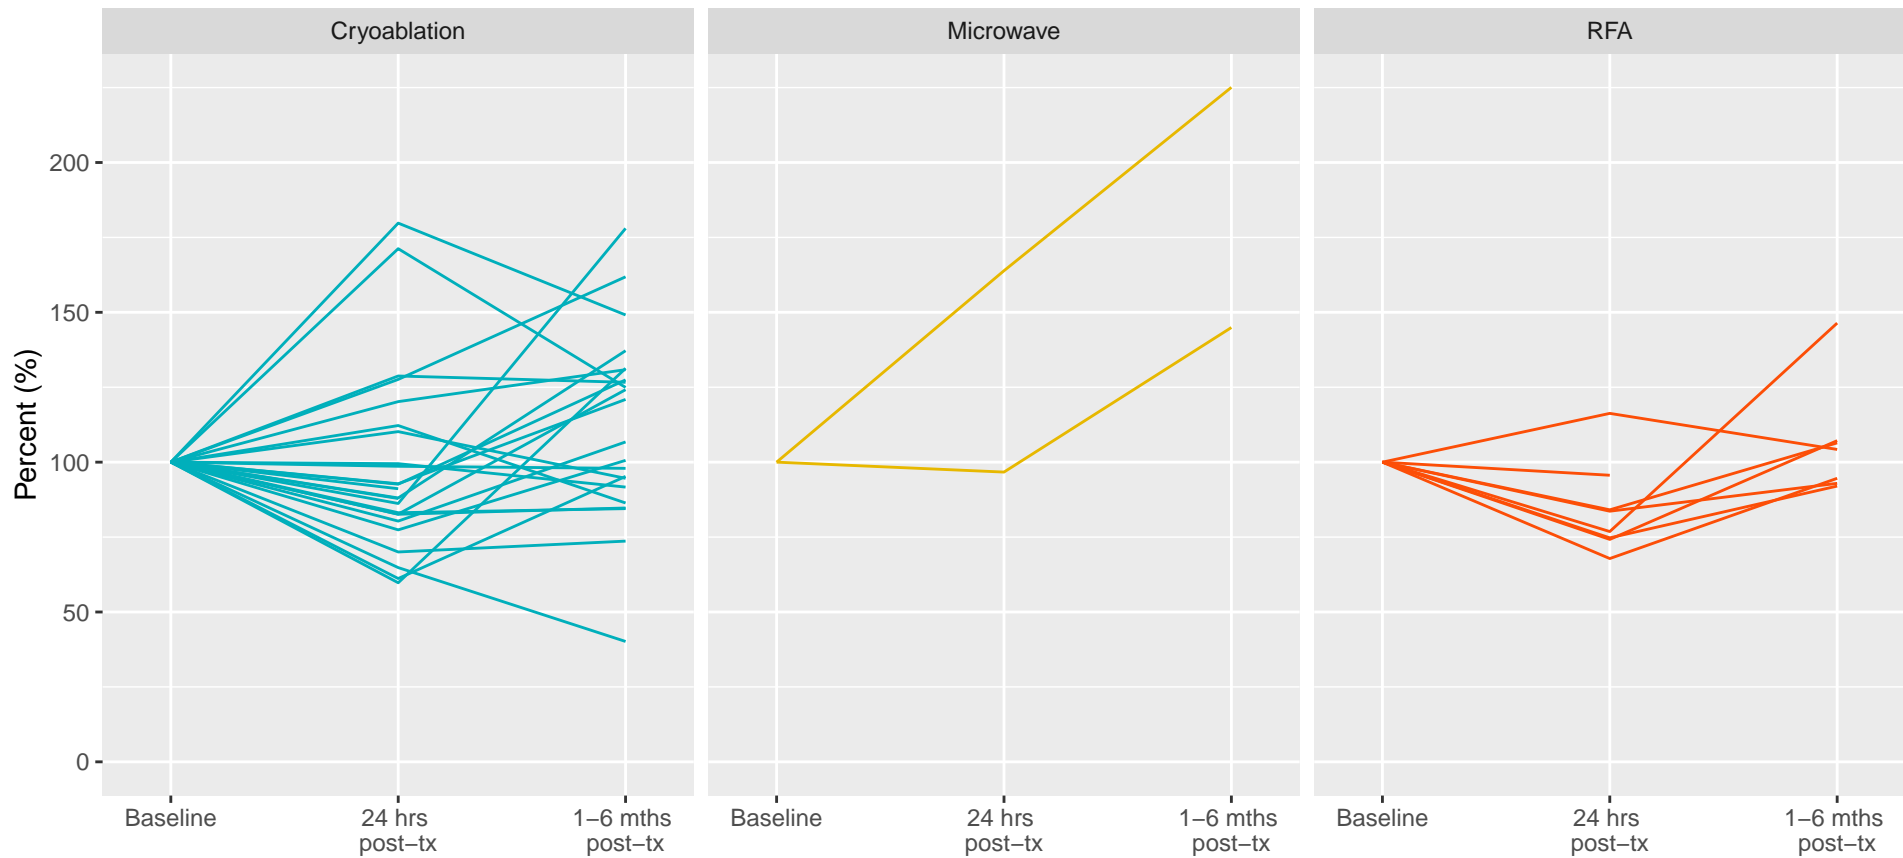

# Uniprot ID: P01732, analyte: CD8A

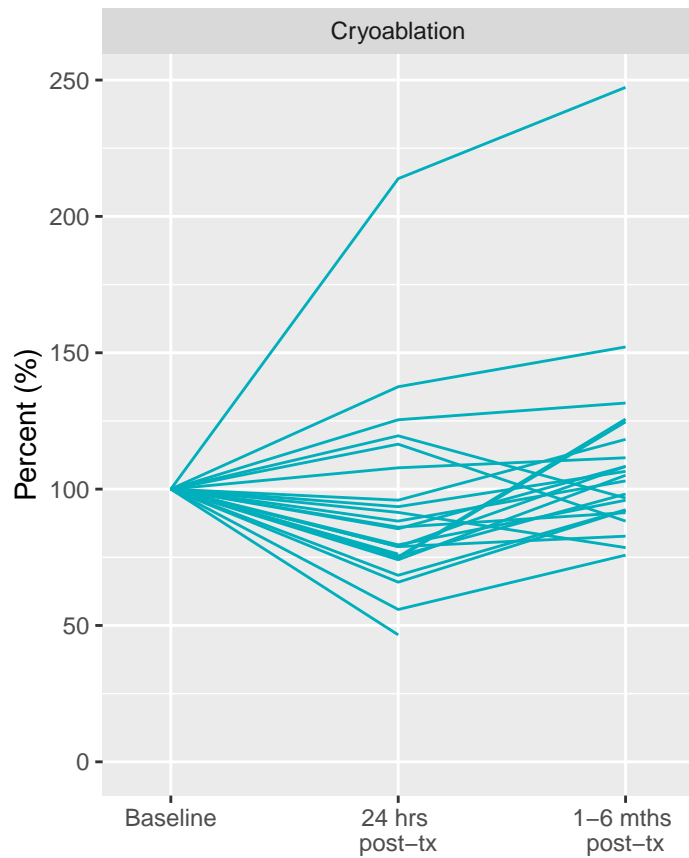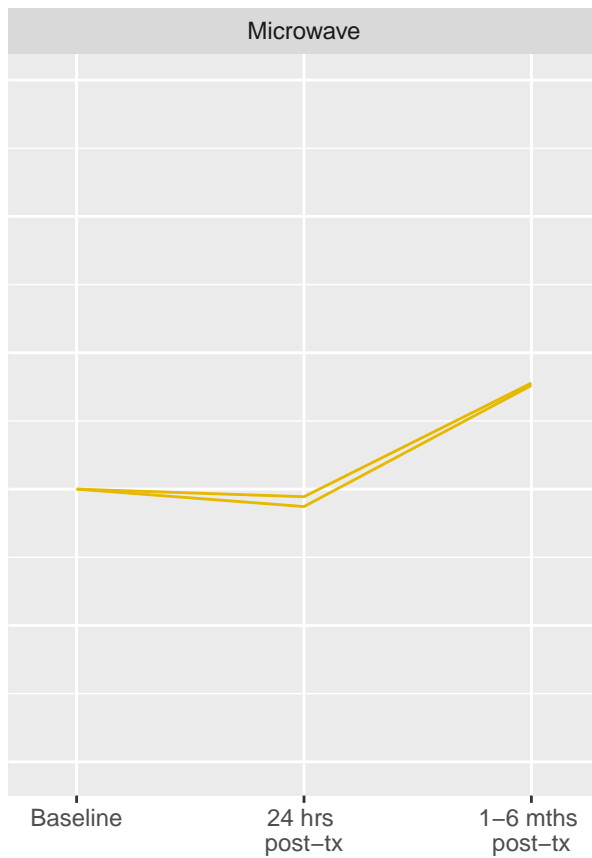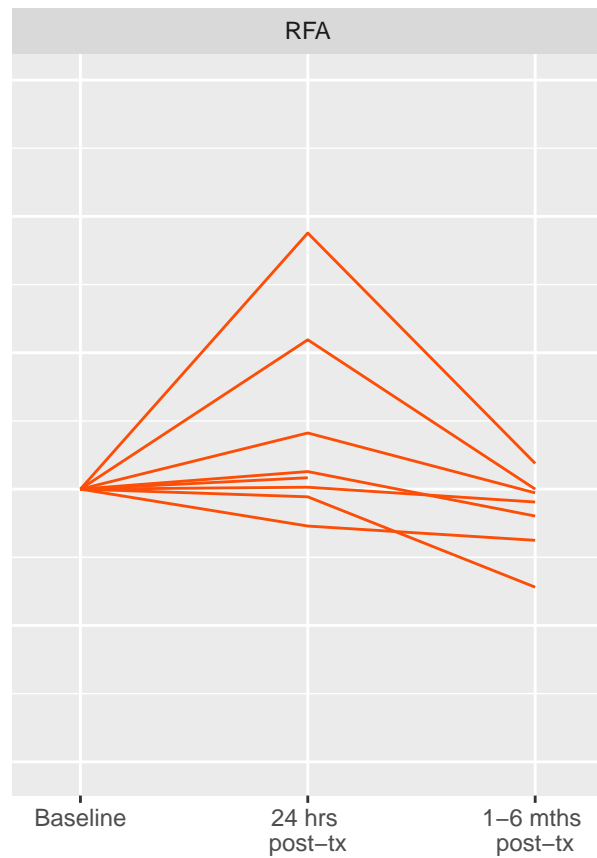

Uniprot ID: Q16790, analyte: CAIX

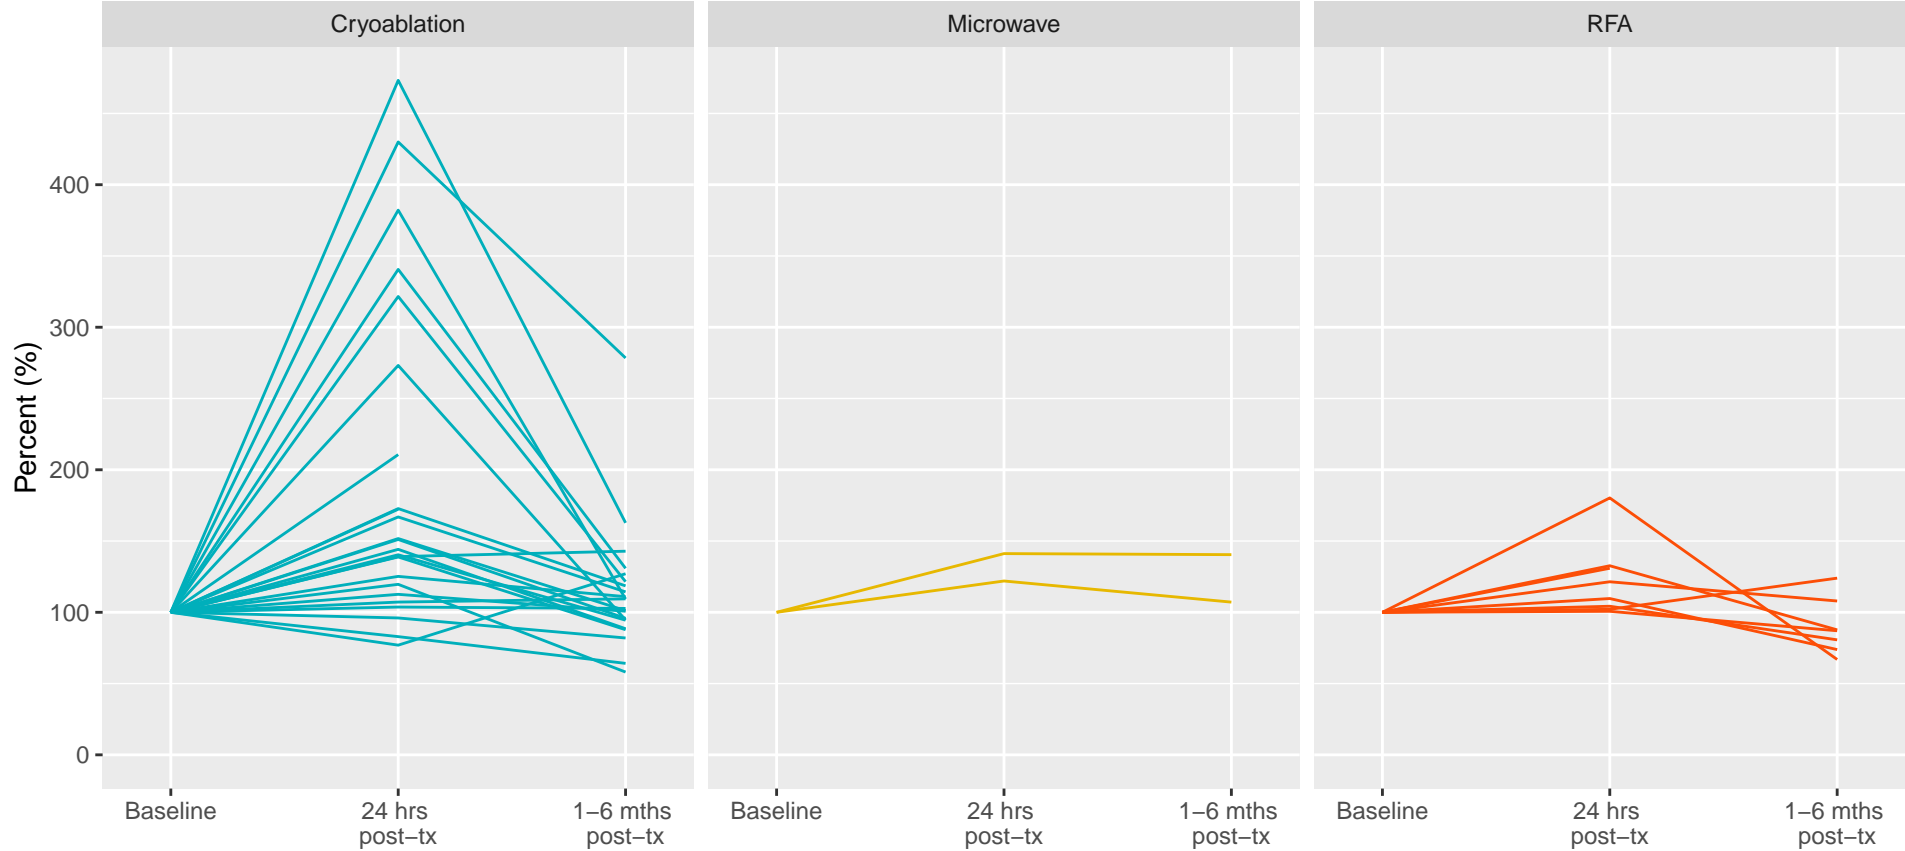

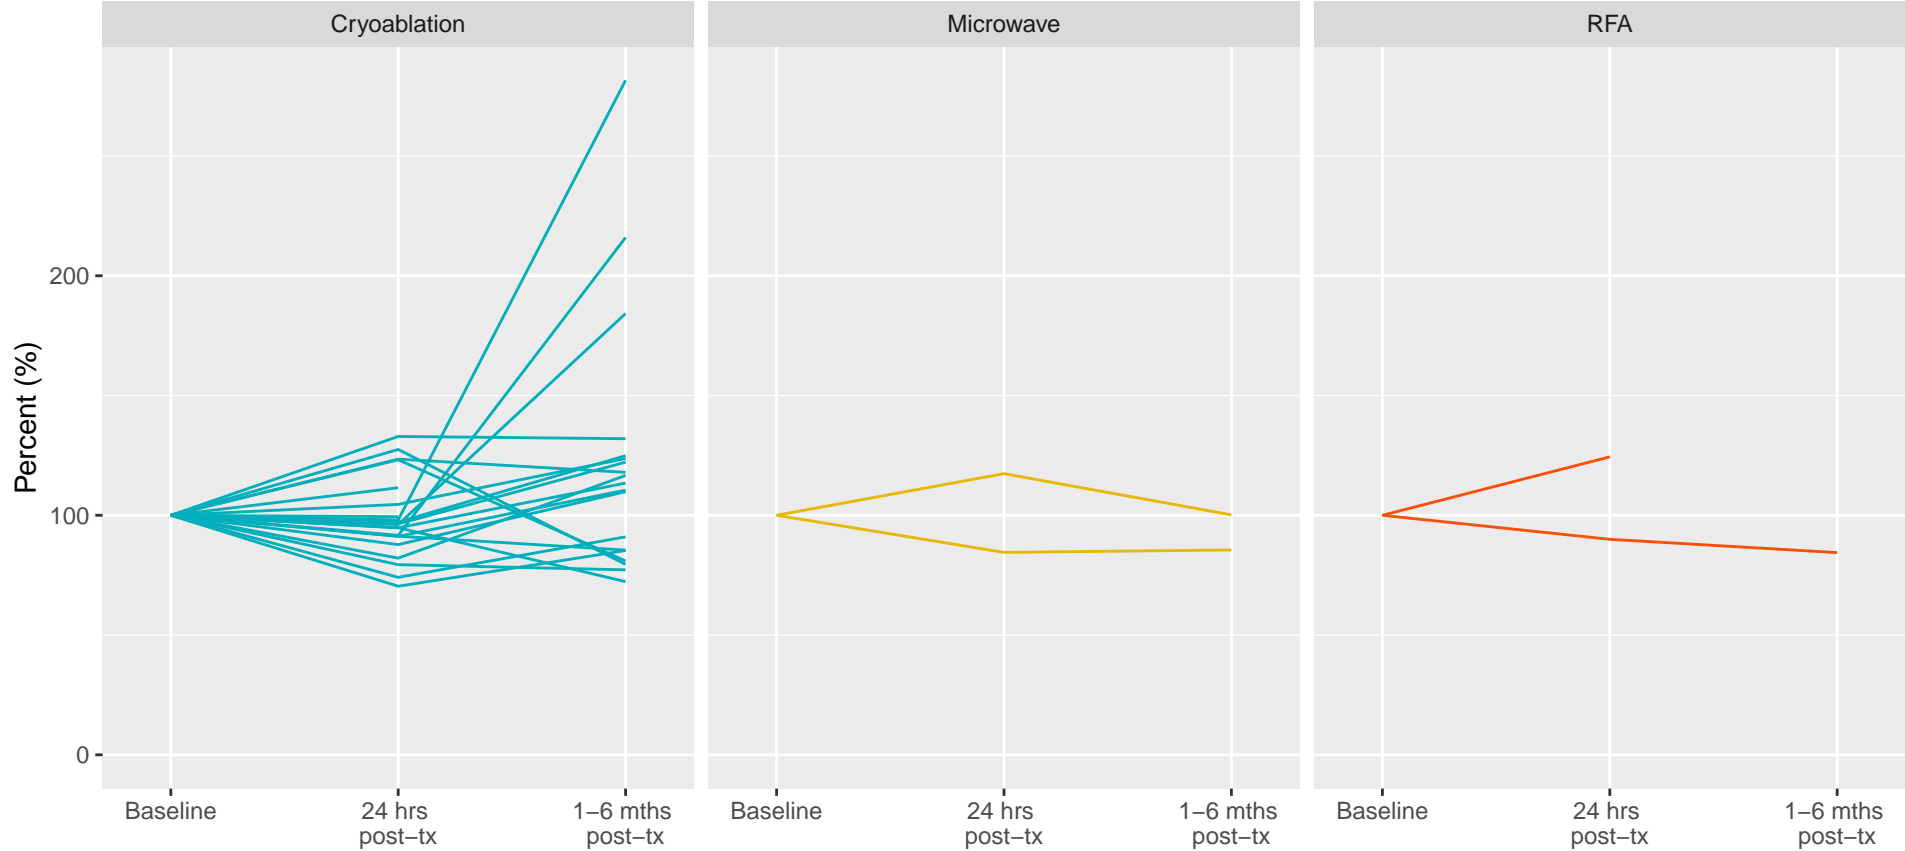

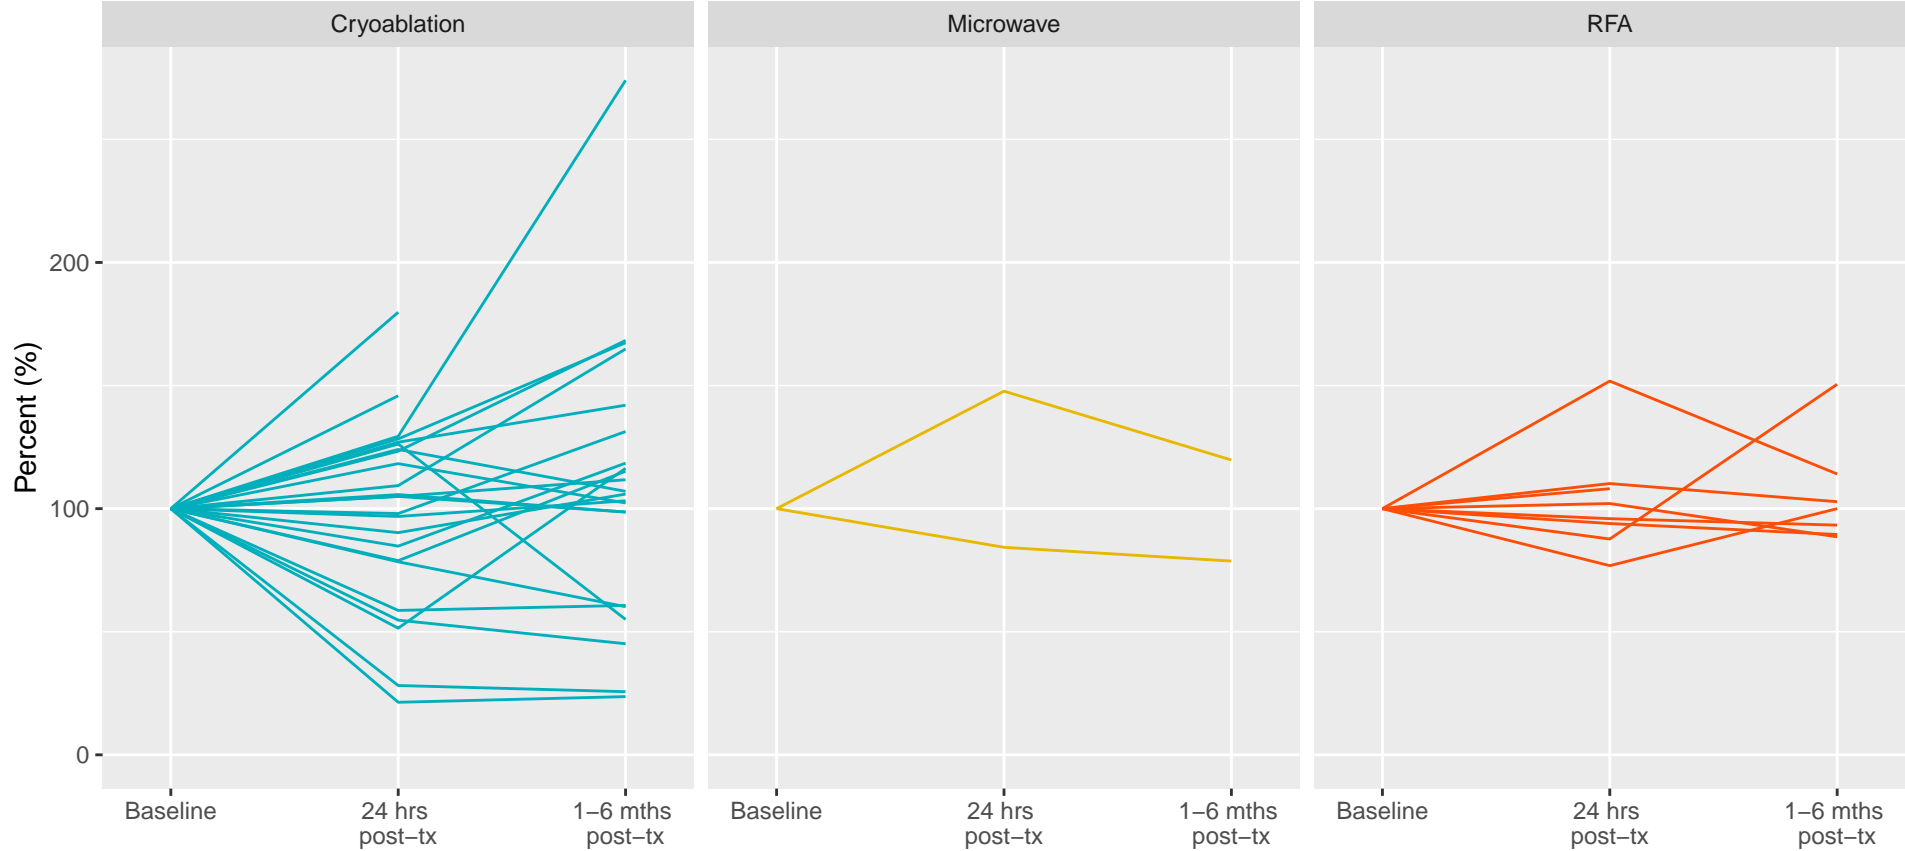



Uniprot ID: P01730, analyte: CD4

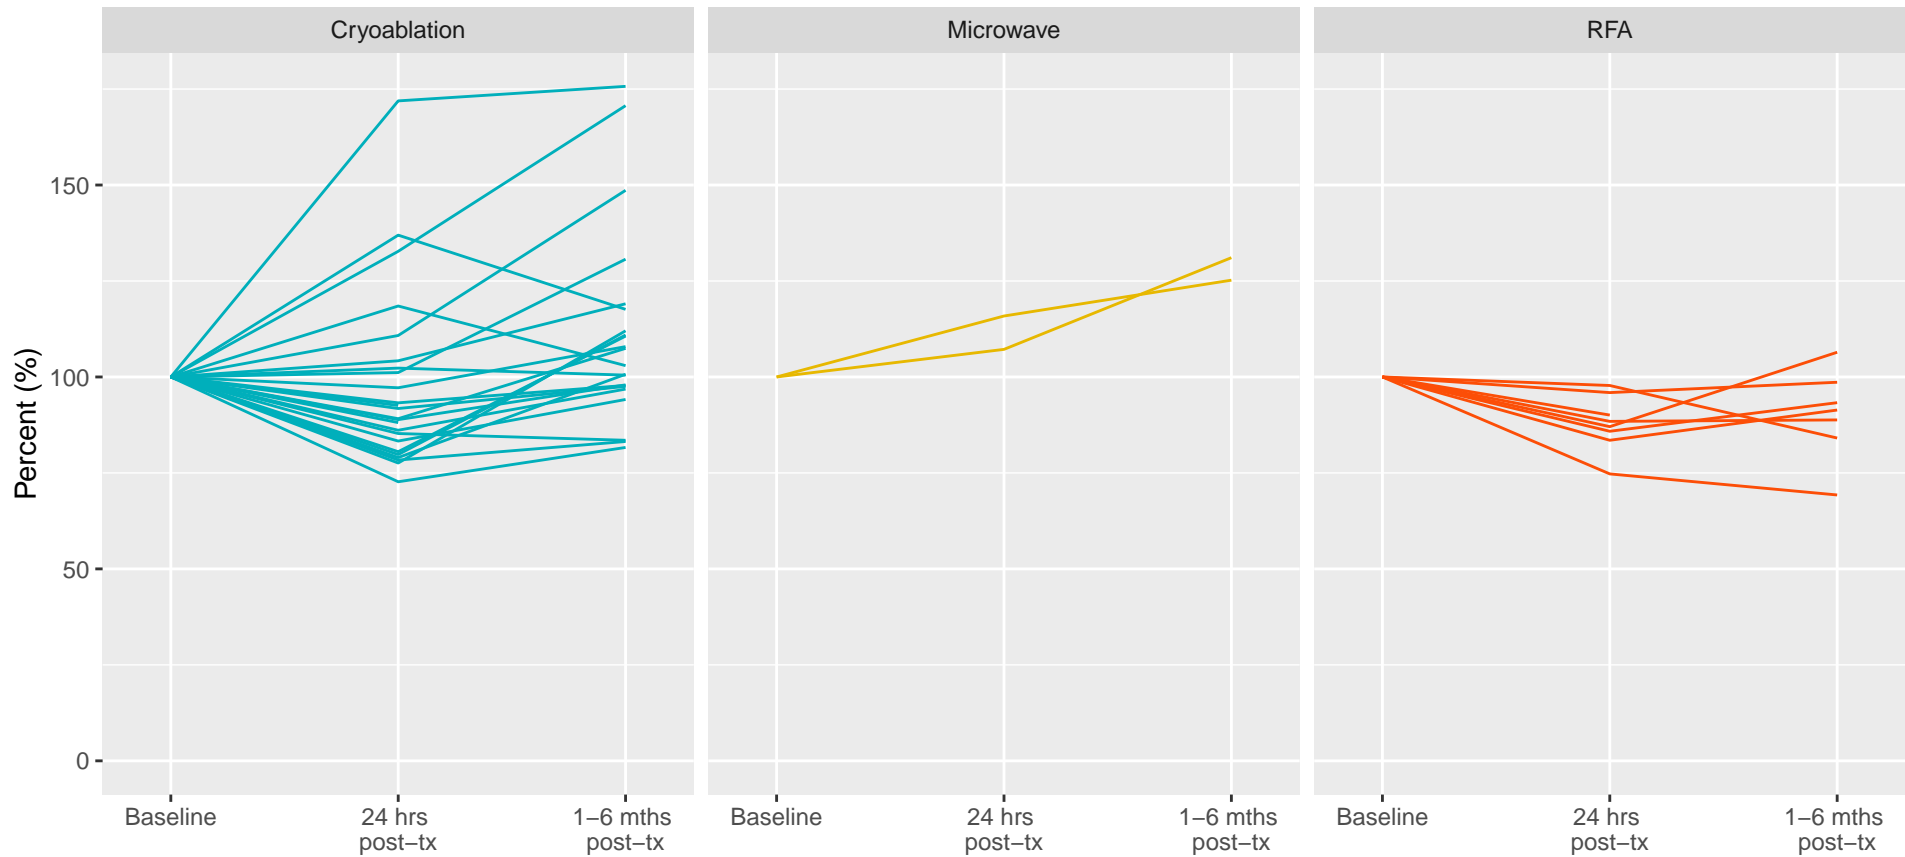

Uniprot ID: P29474, analyte: NOS3

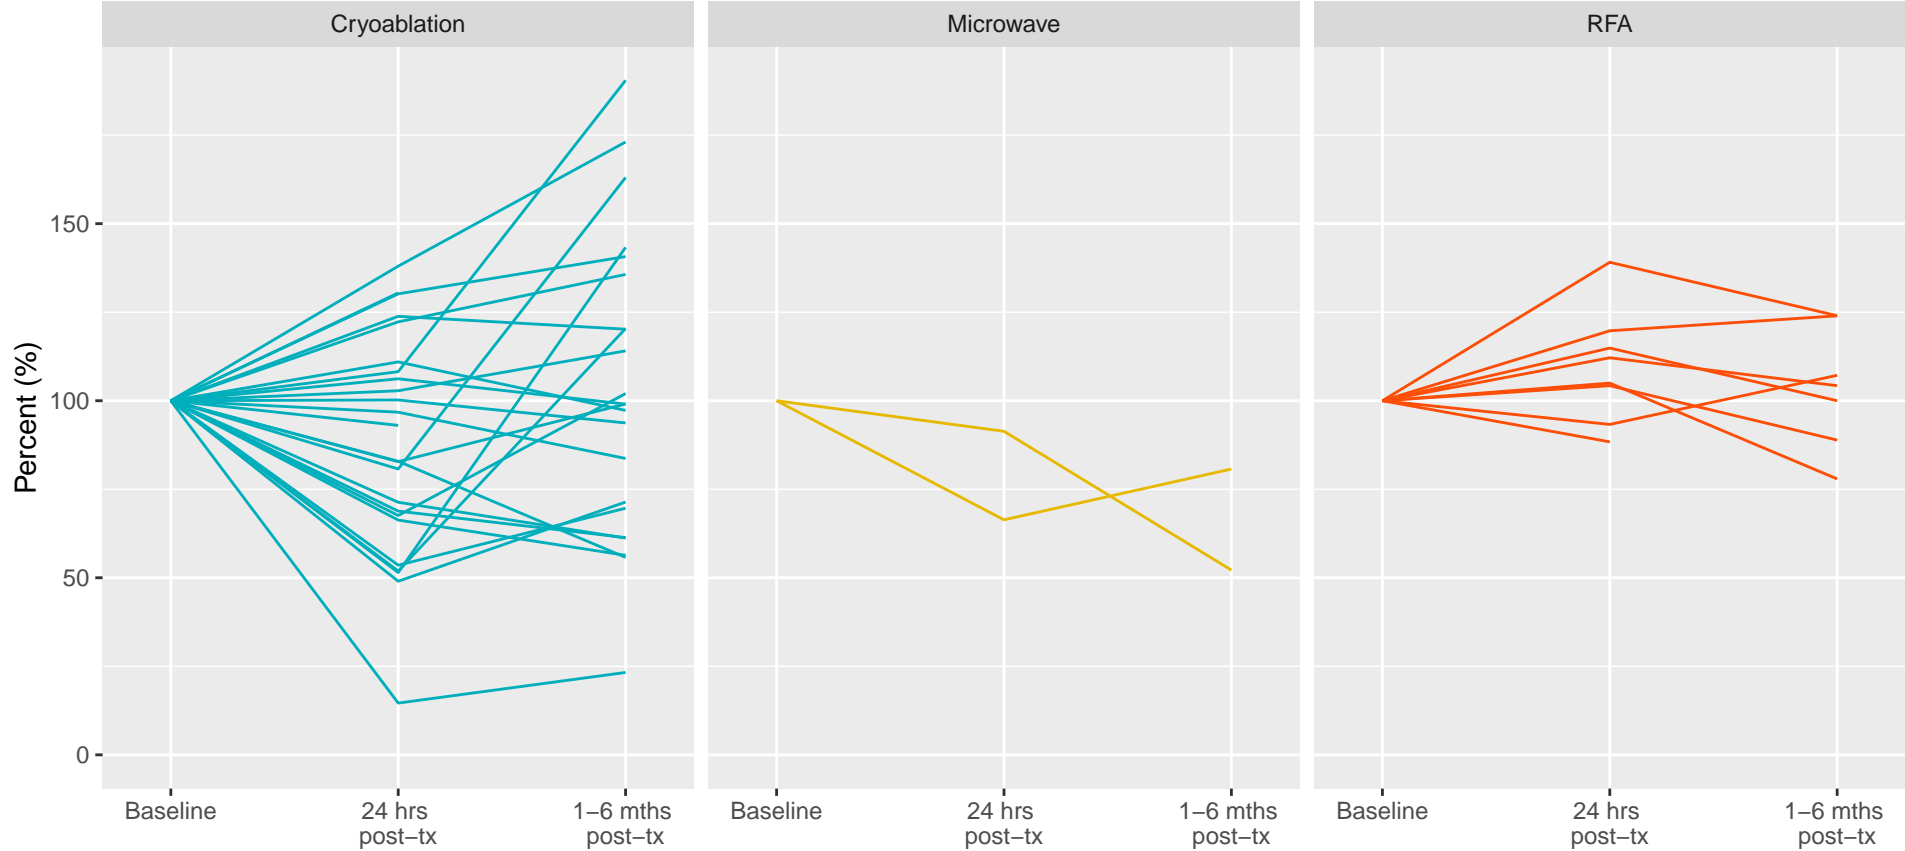

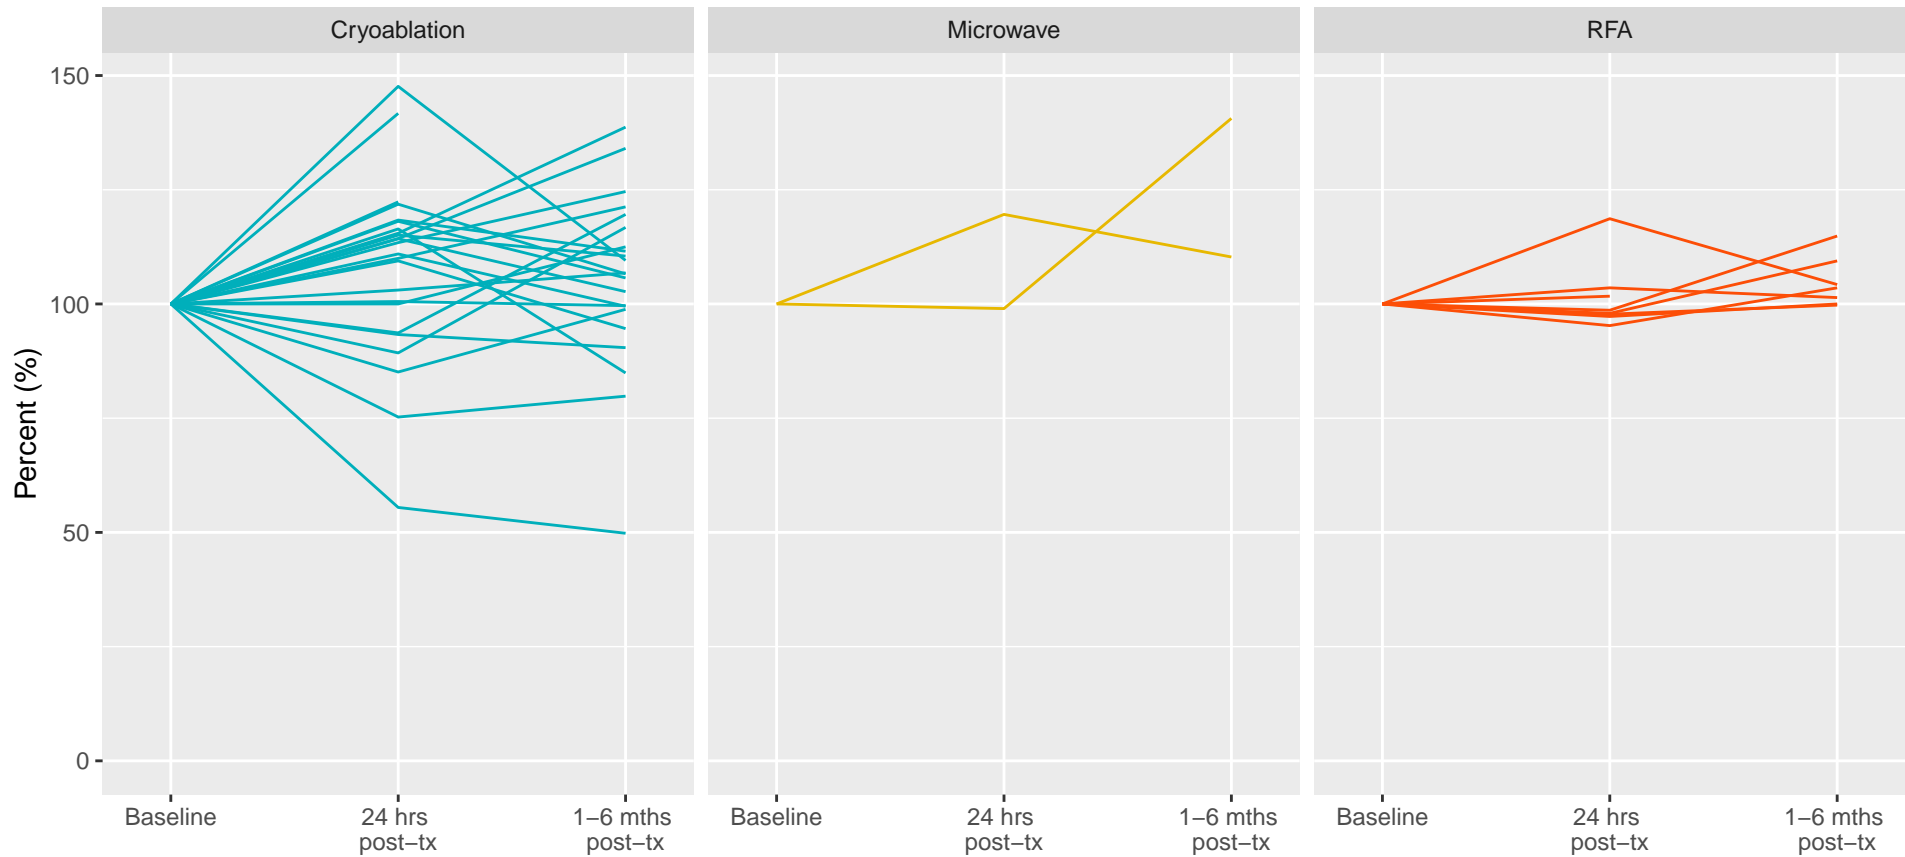

Uniprot ID: P35968, analyte: VEGFR-2

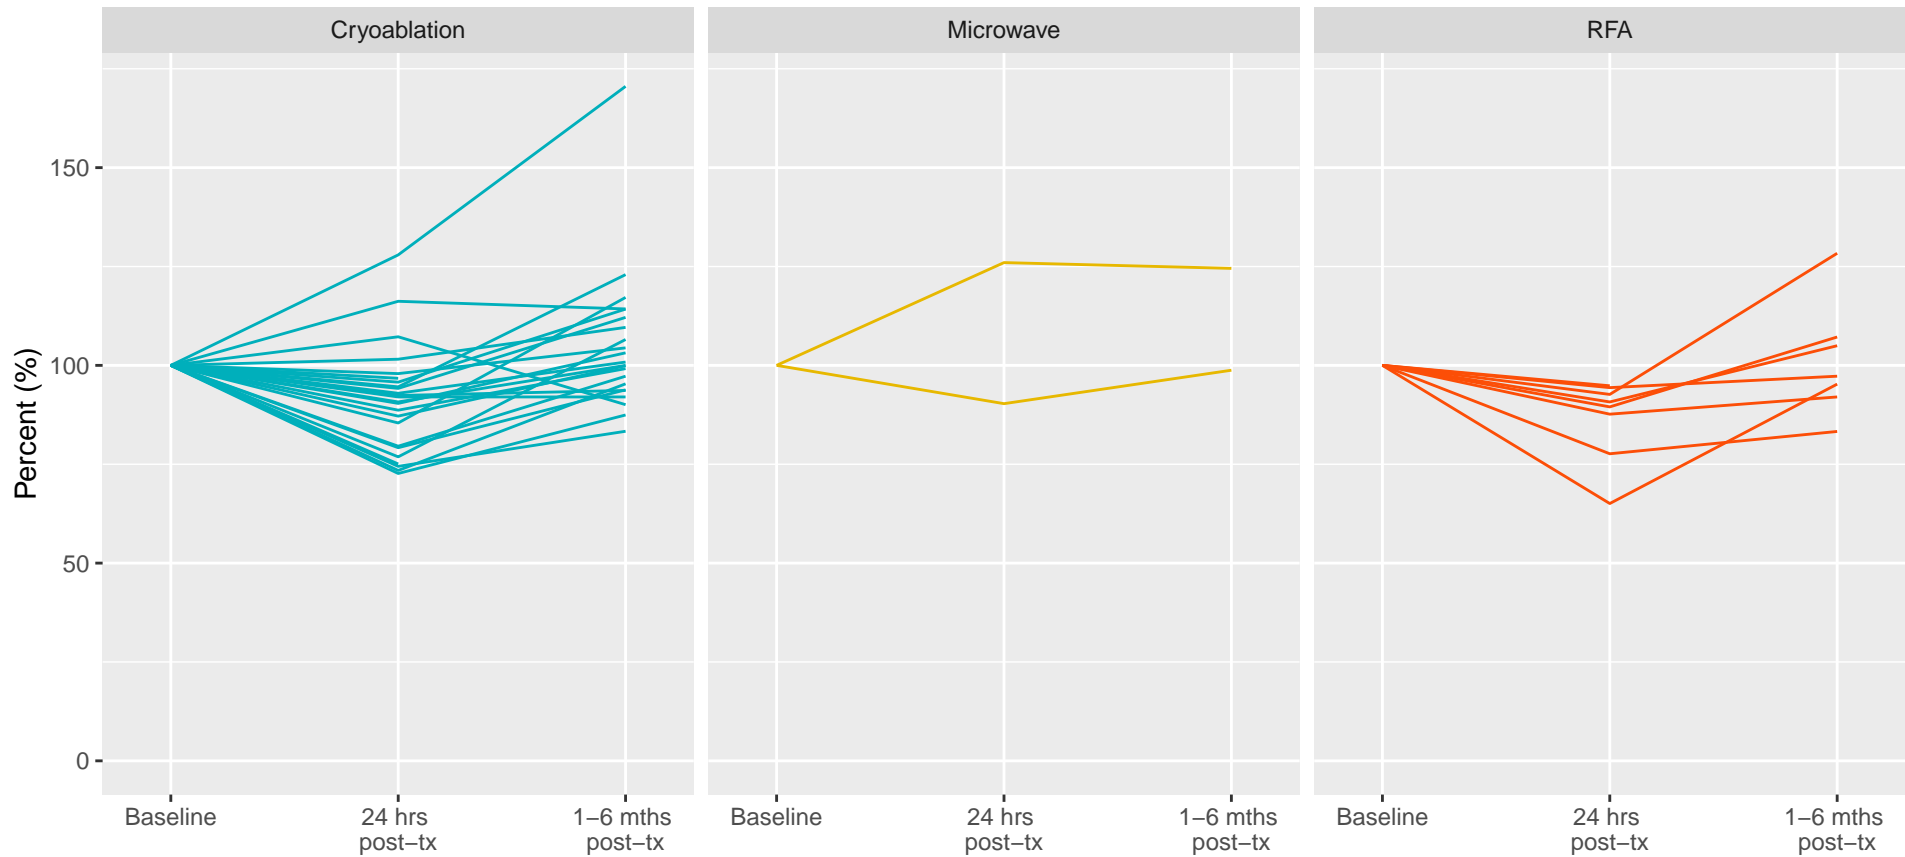

Uniprot ID: P25942, analyte: CD40

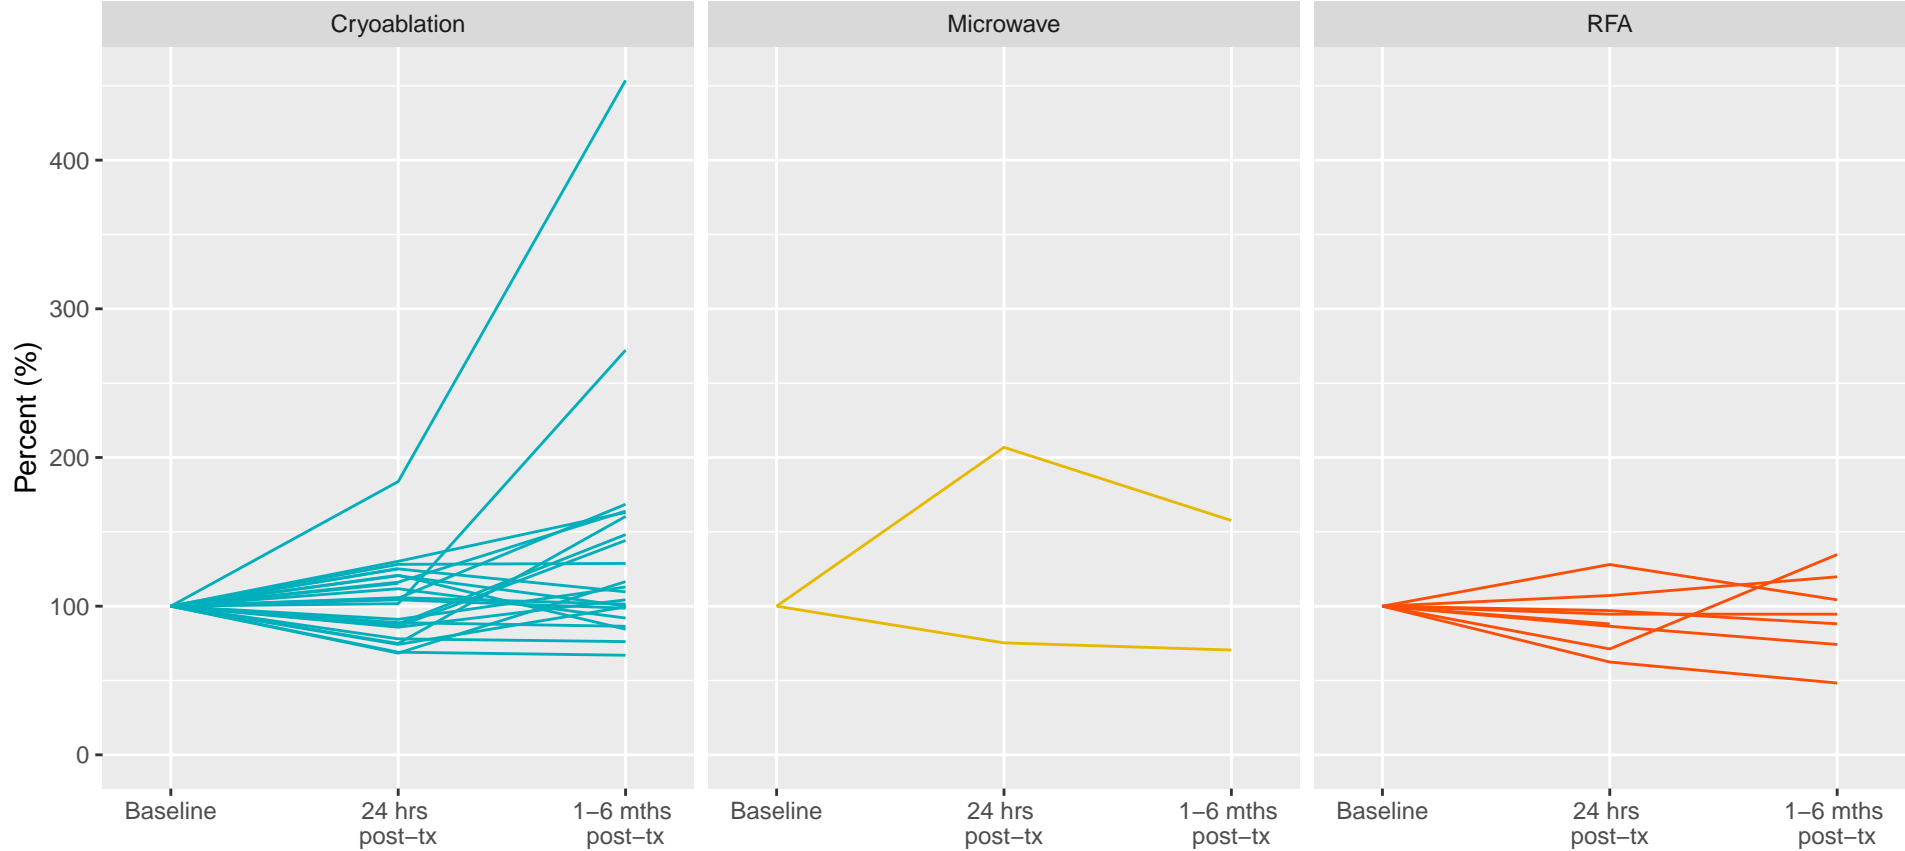

Uniprot ID: Q14116, analyte: IL18

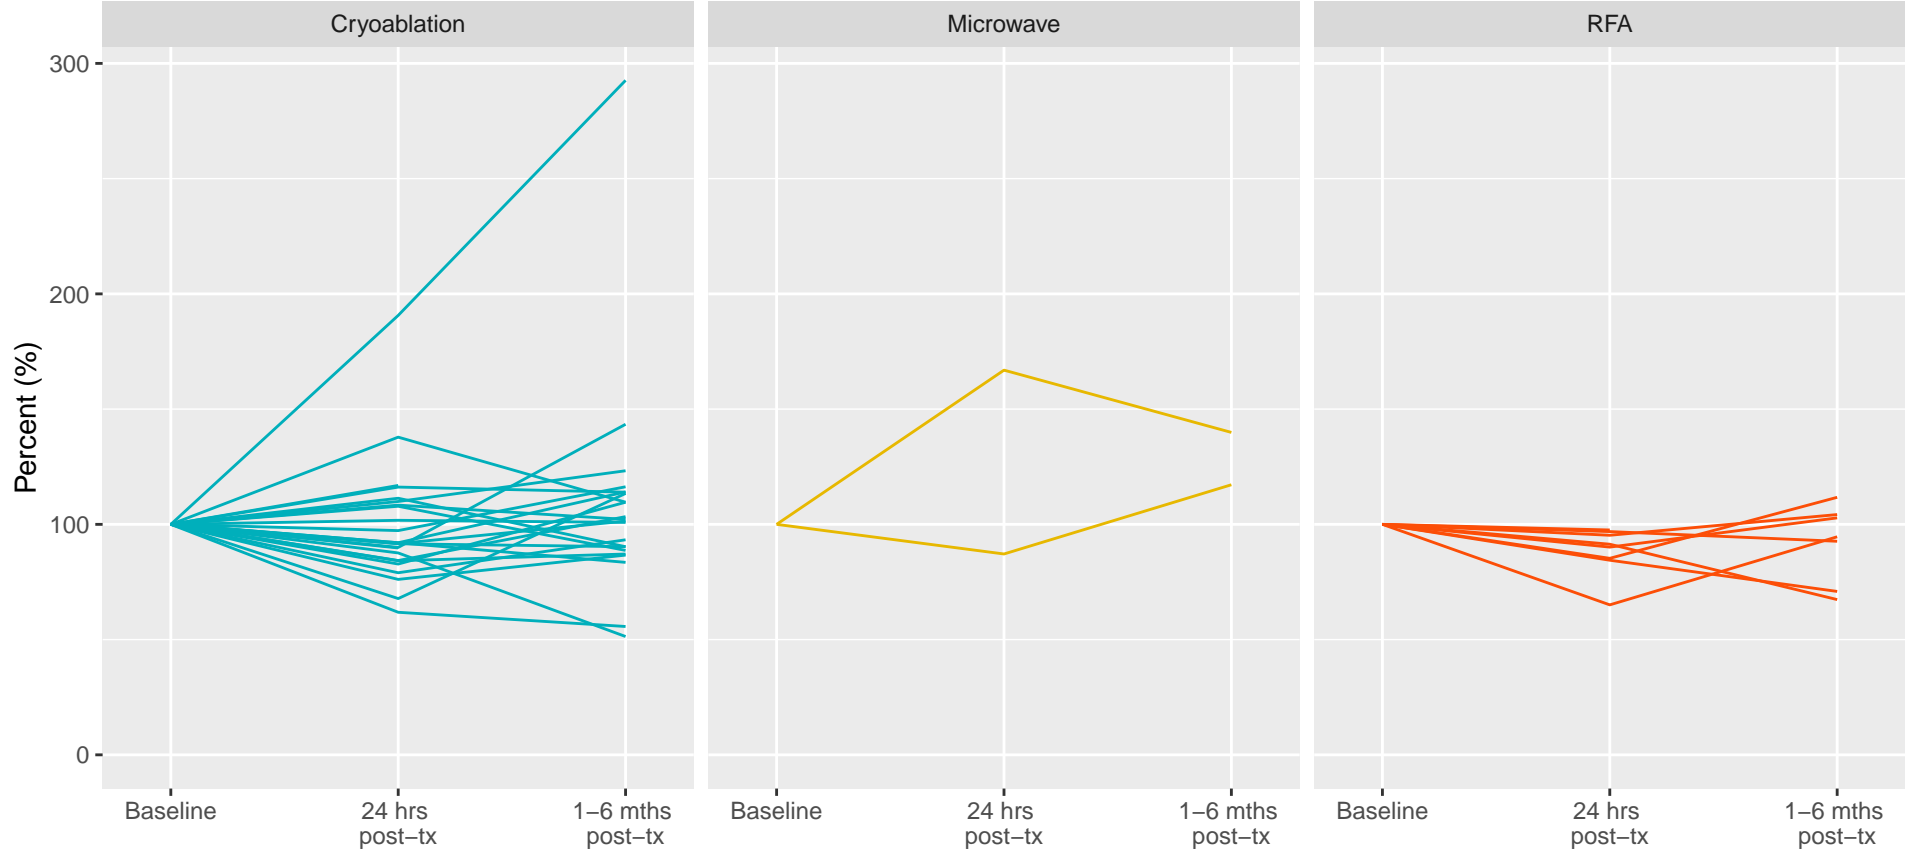

Uniprot ID: P20718, analyte: GZMH

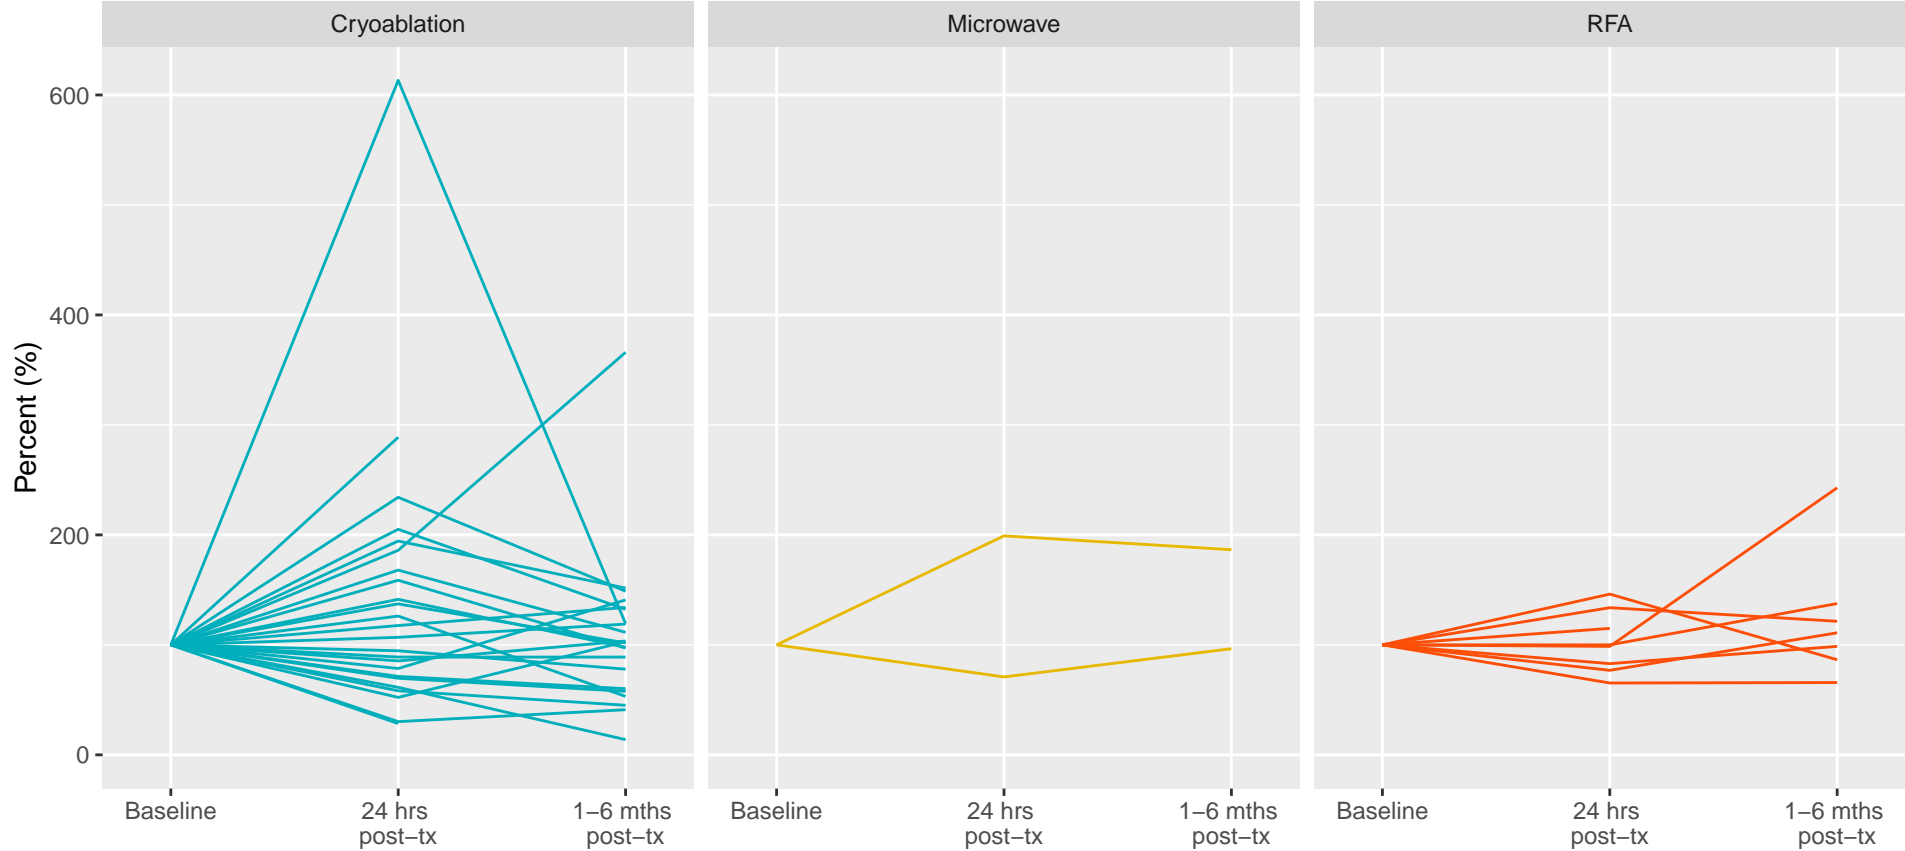

Uniprot ID: P43629, analyte: KIR3DL1

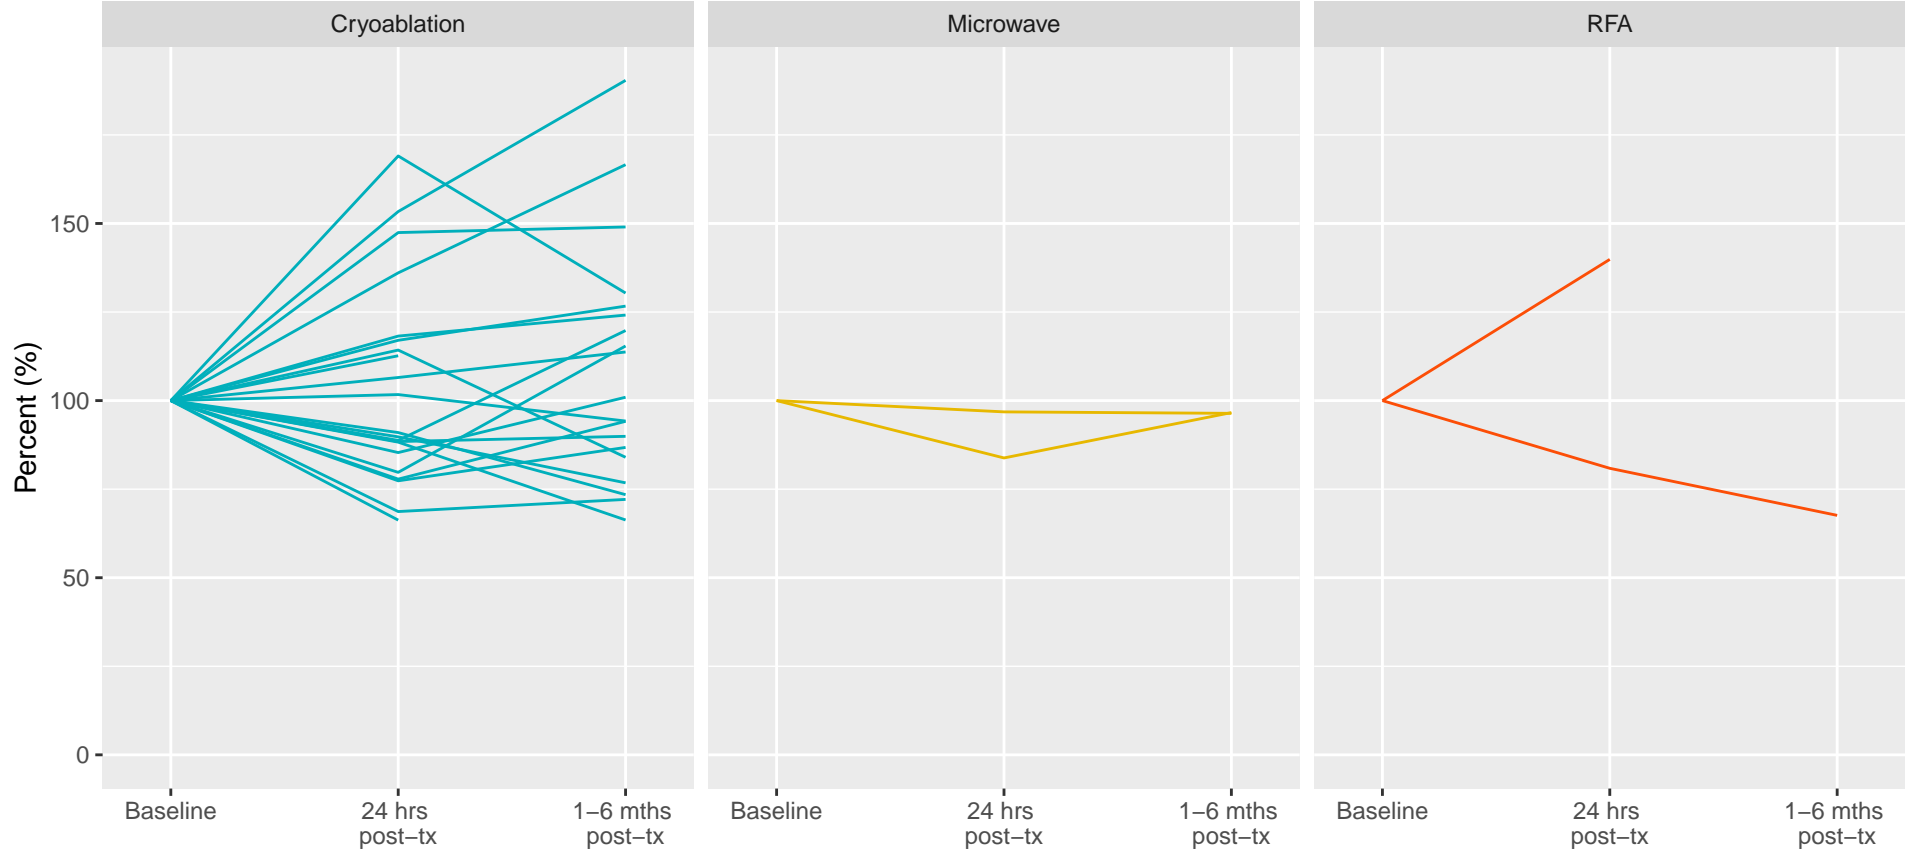



Uniprot ID: P01137, analyte: LAP TGF-beta-1

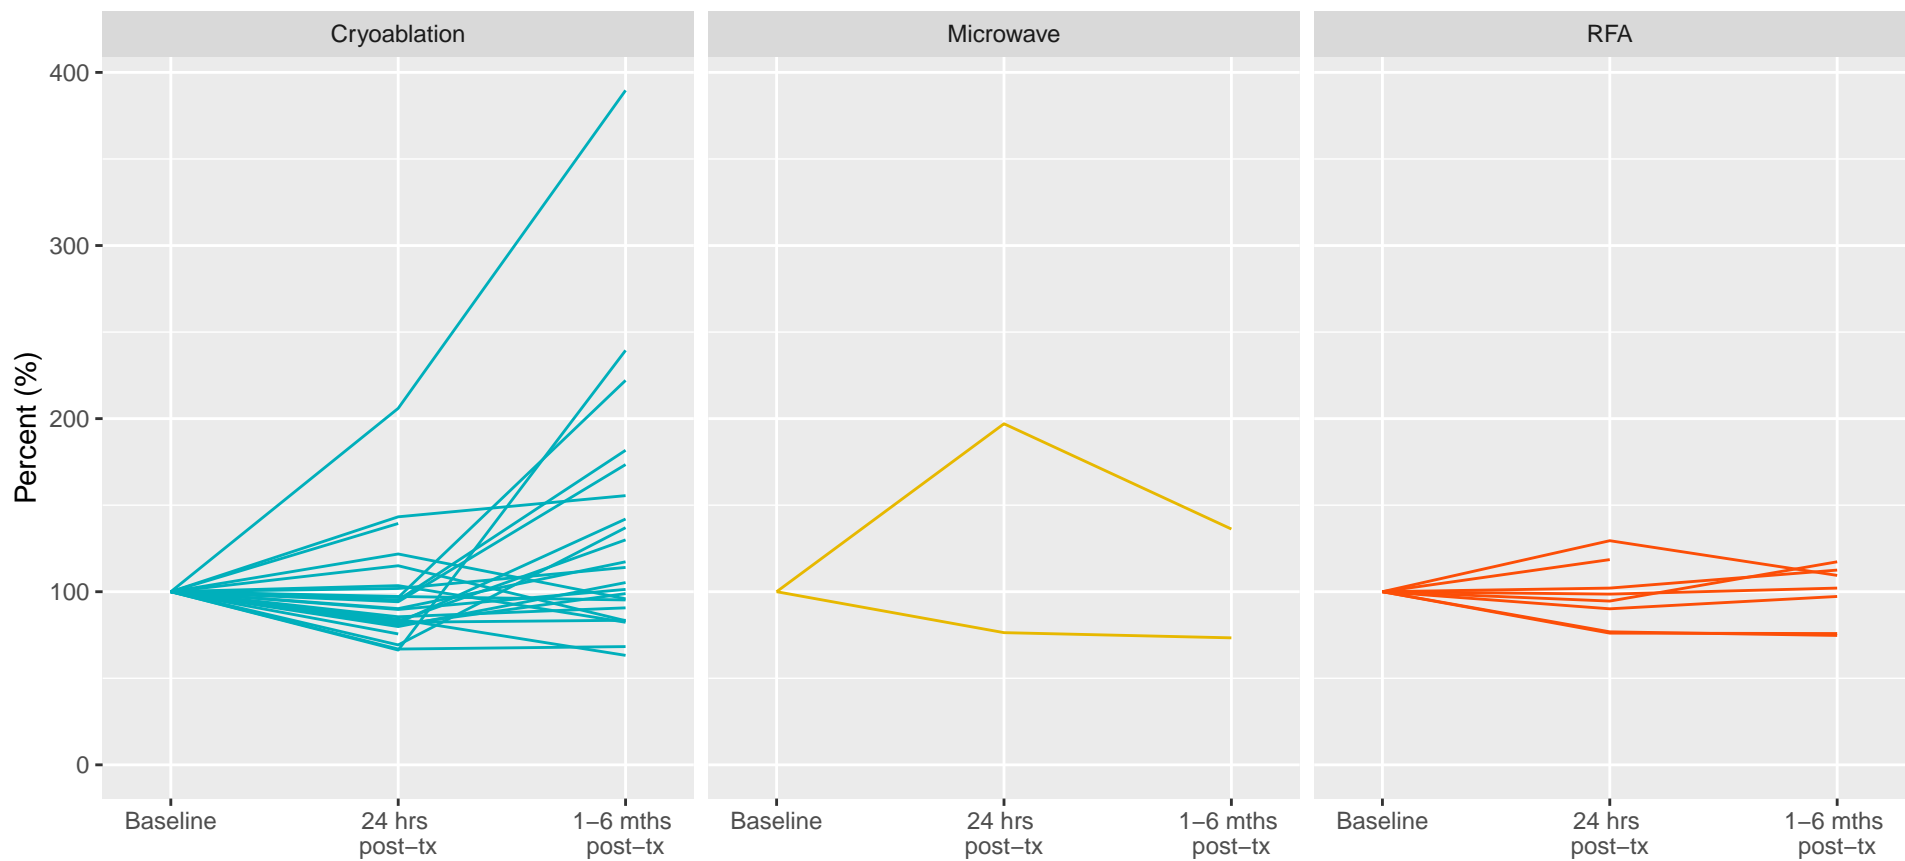

Uniprot ID: P09341, analyte: CXCL1

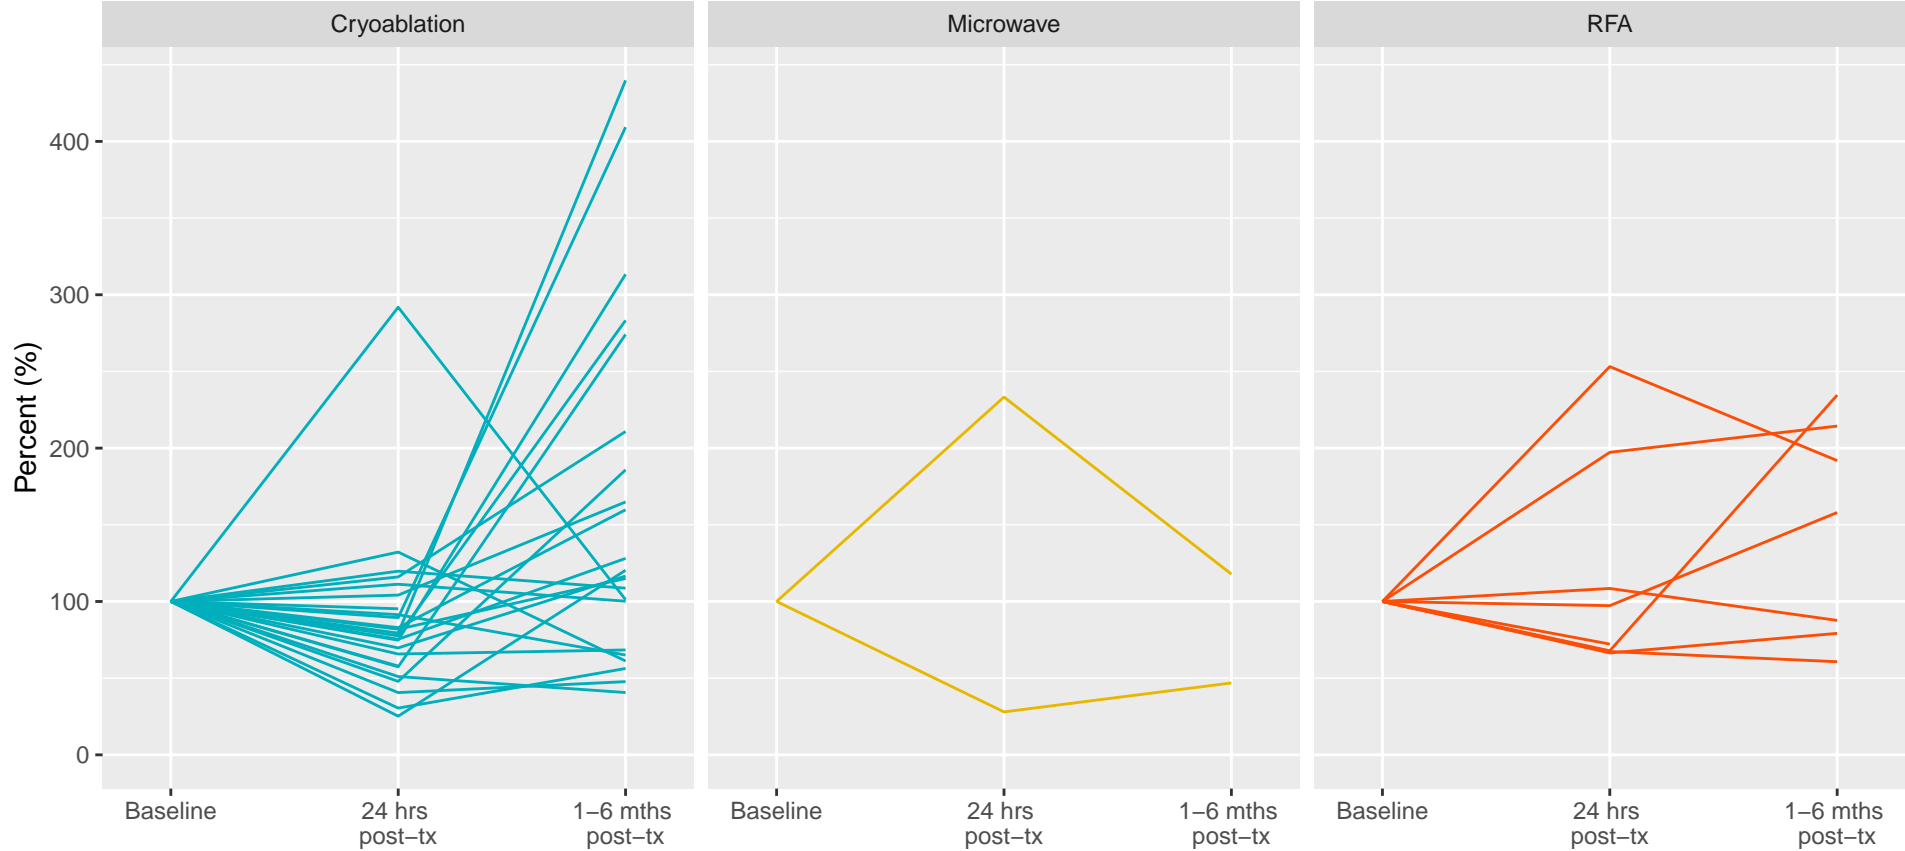

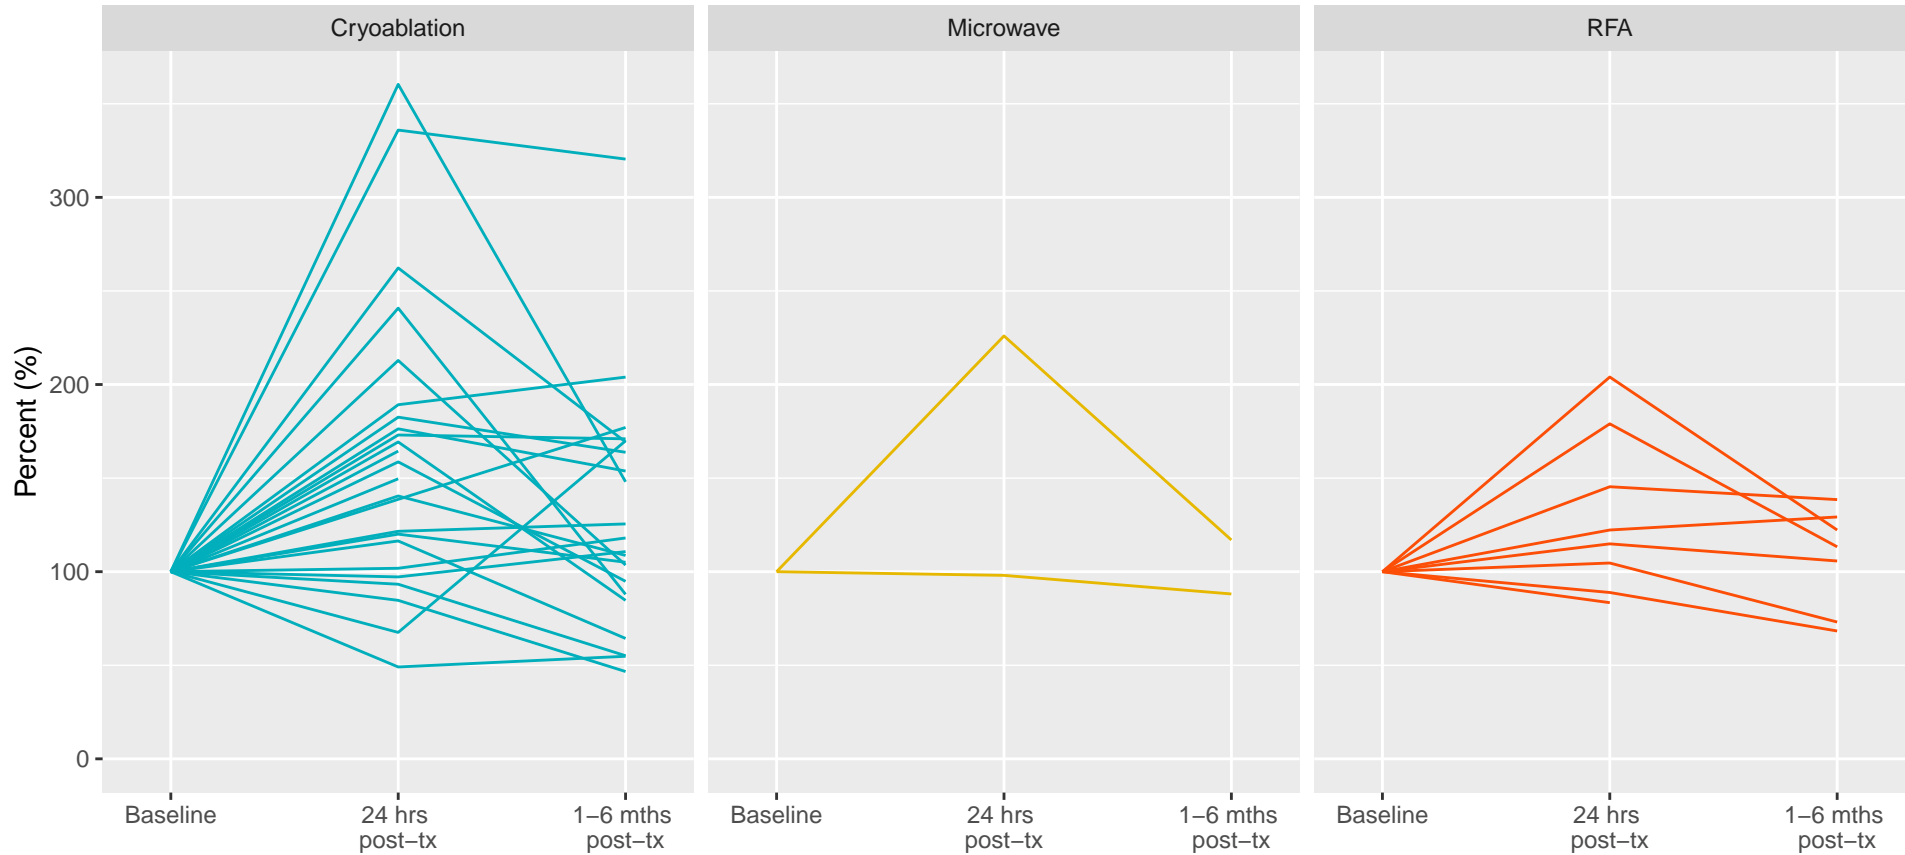

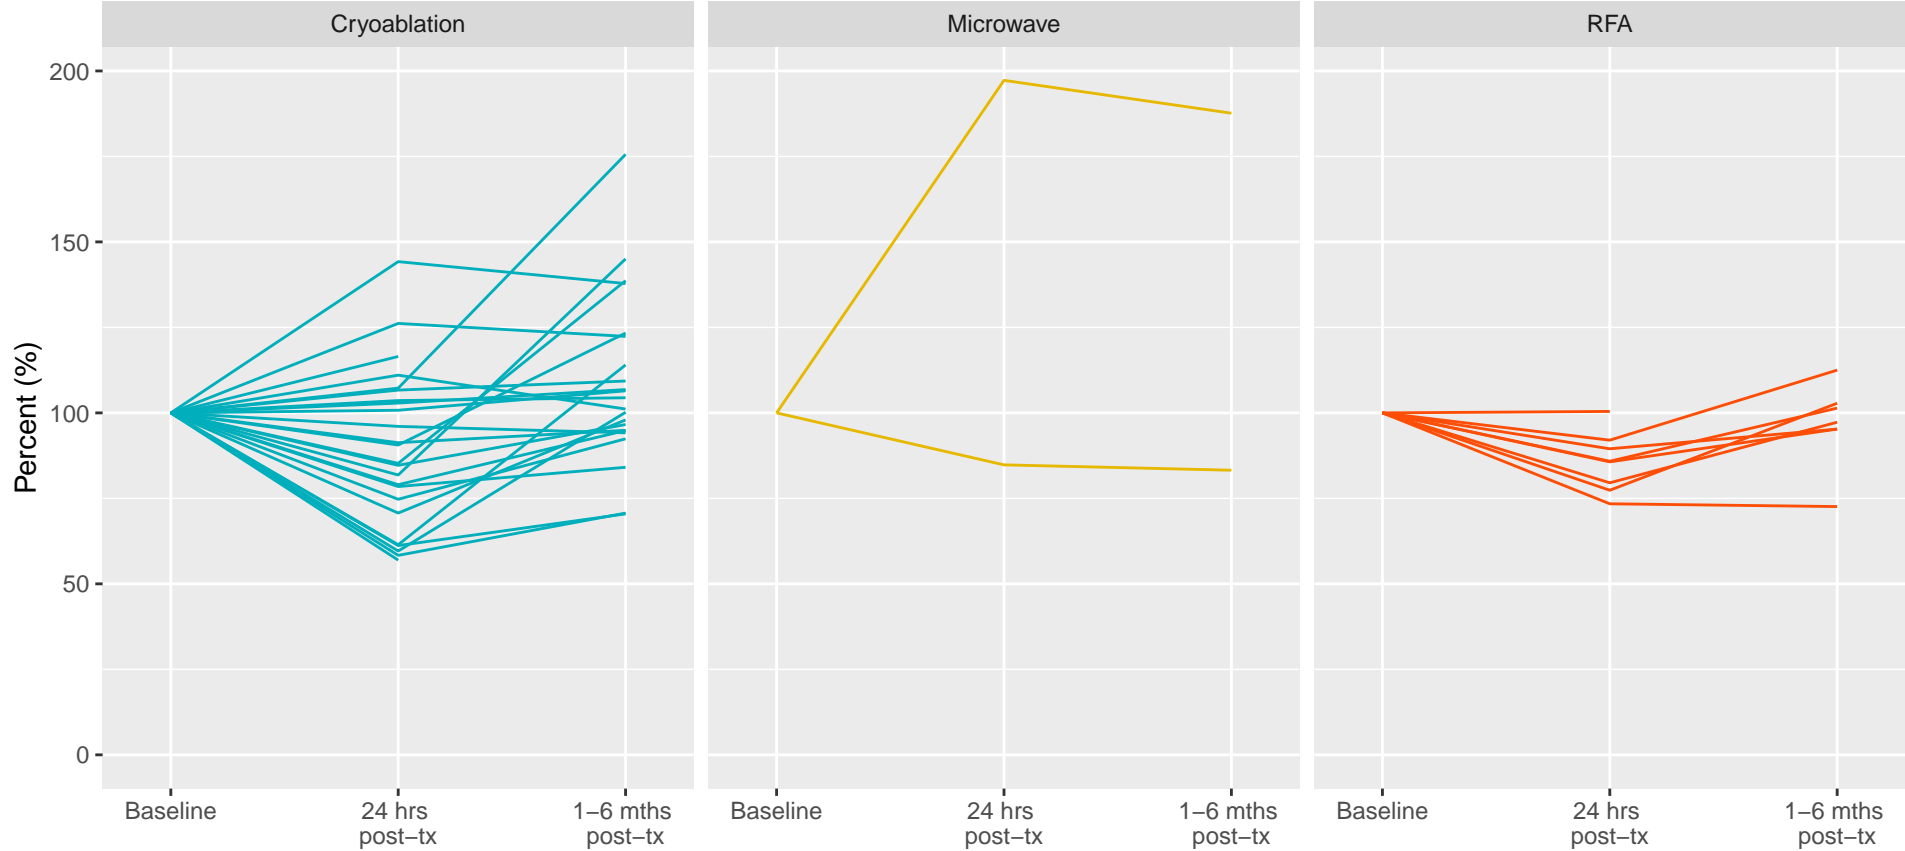

Uniprot ID: P01127, analyte: PDGF subunit B

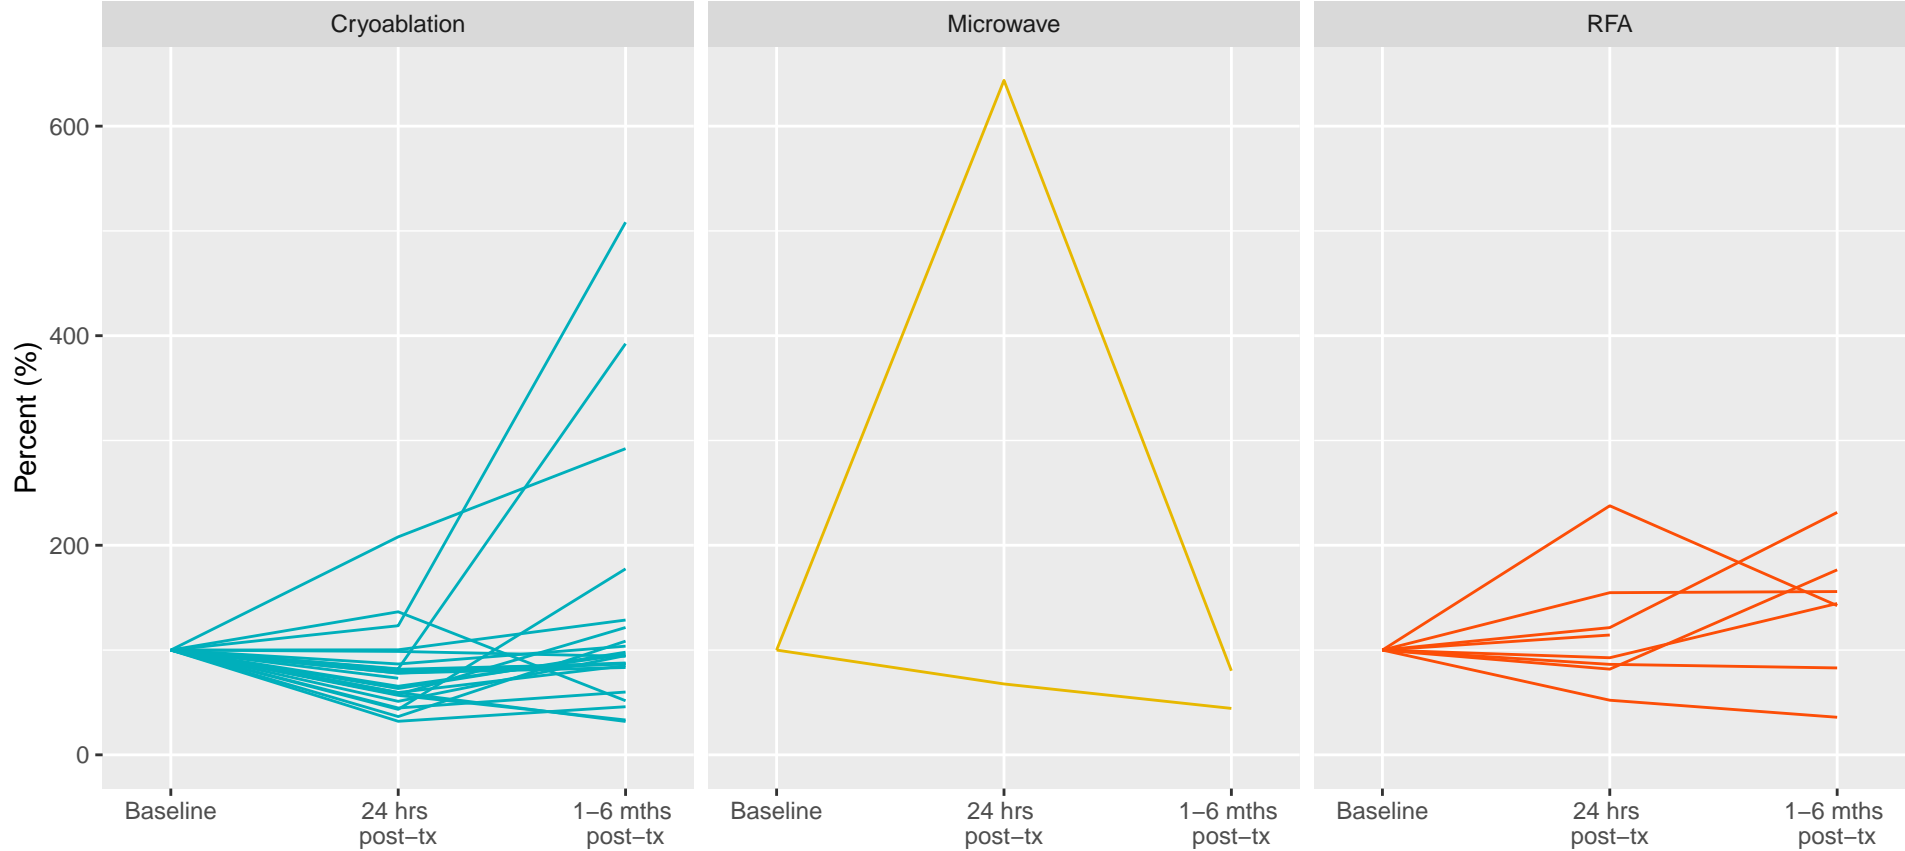

# Uniprot ID: Q15116, analyte: PDCD1

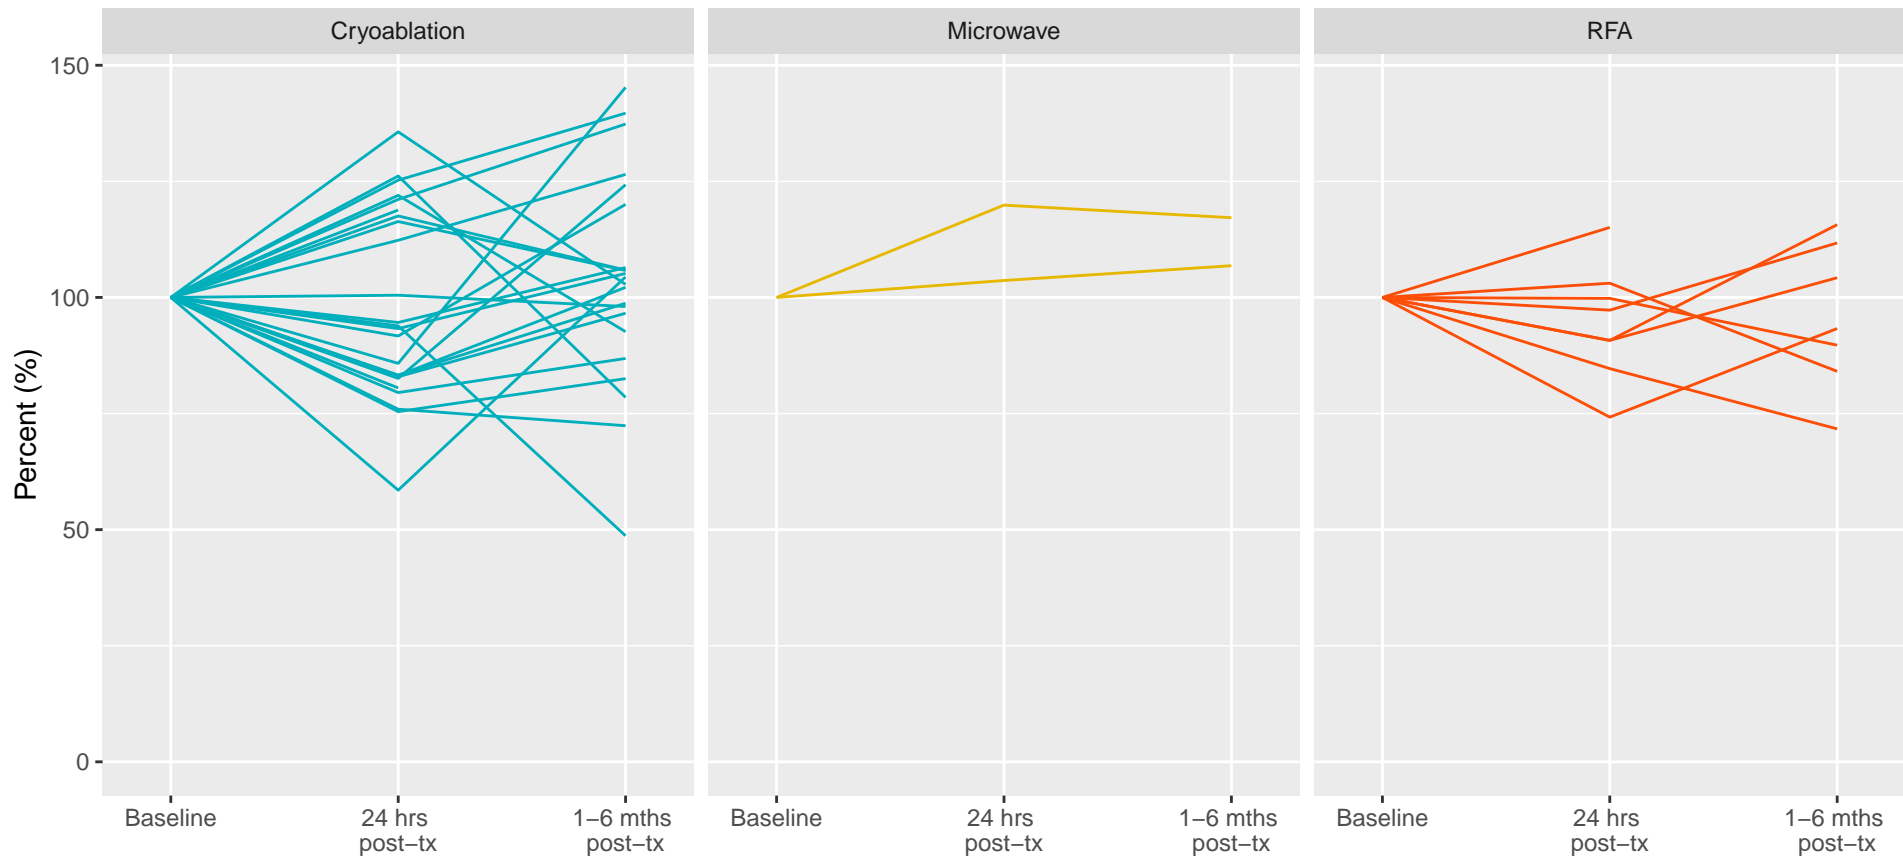

Uniprot ID: P48023, analyte: FASLG

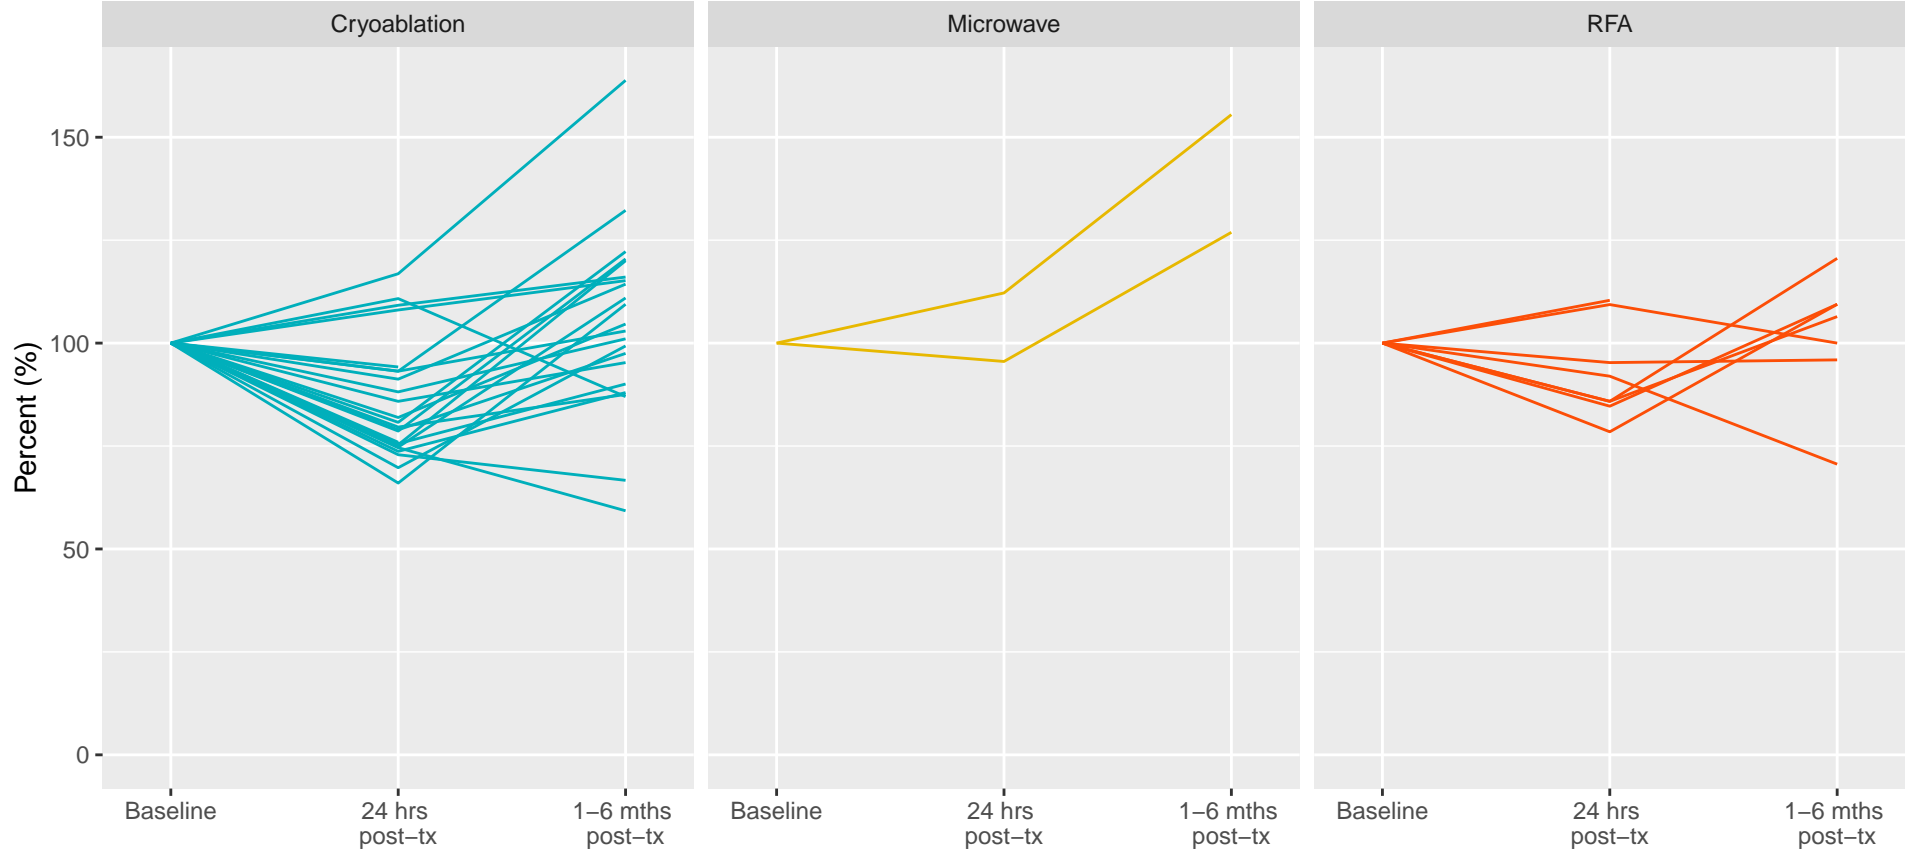

Uniprot ID: P10747, analyte: CD28

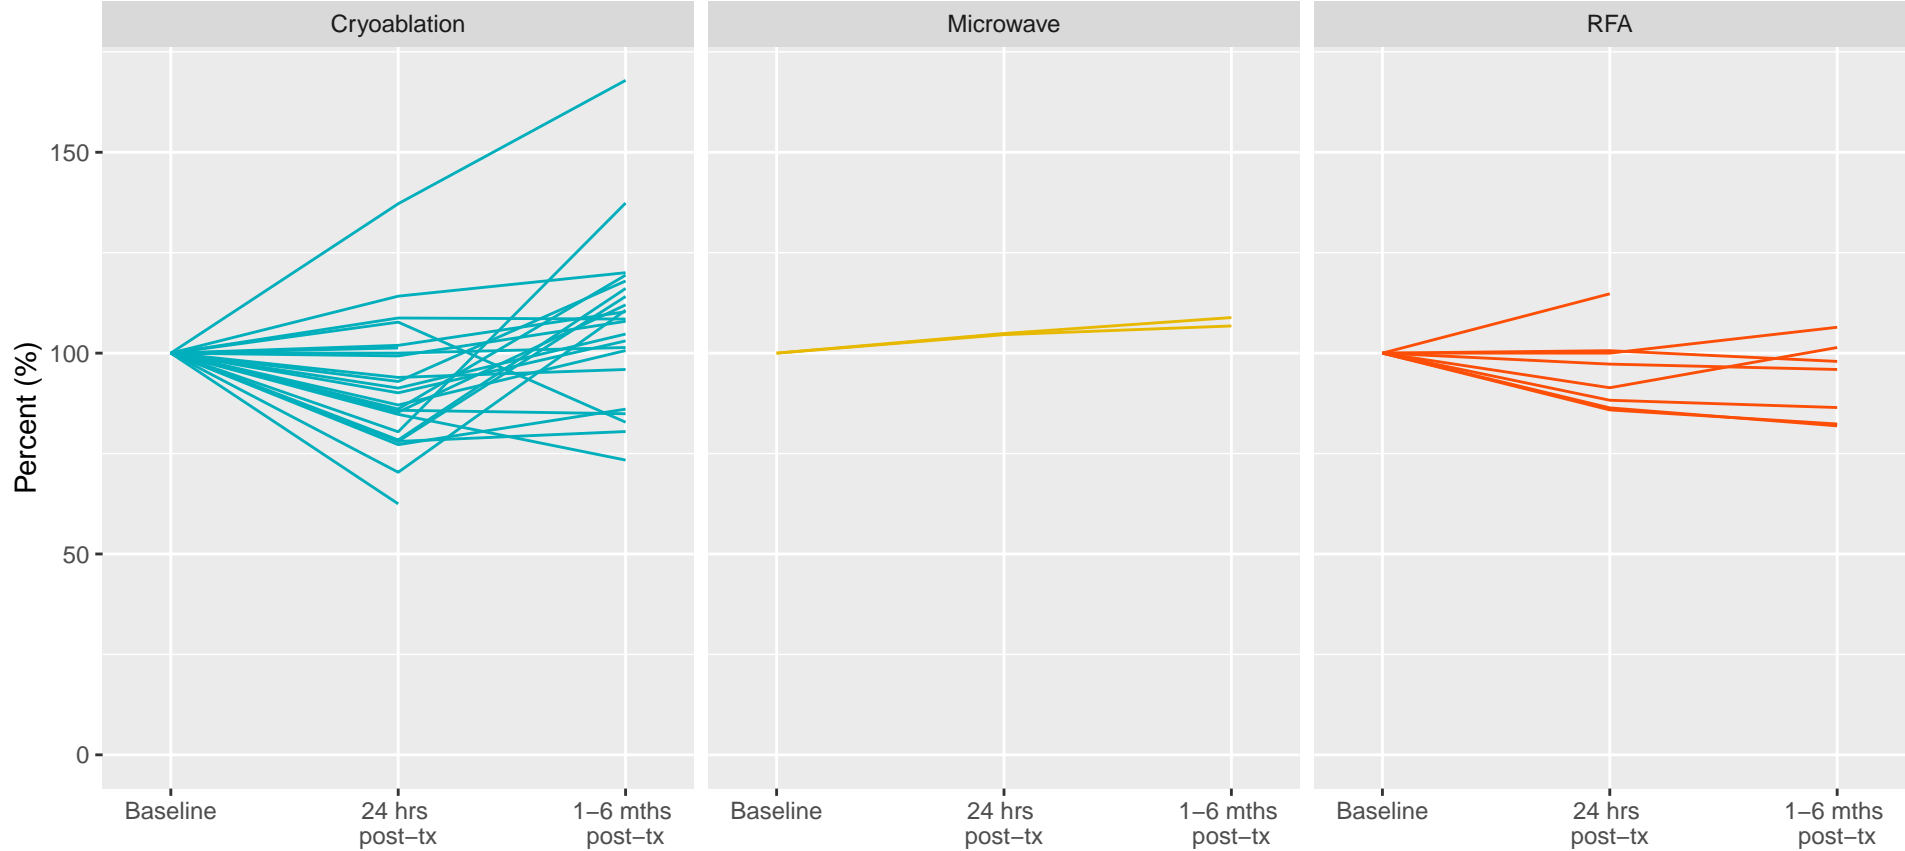



# Uniprot ID: Q99731, analyte: CCL19

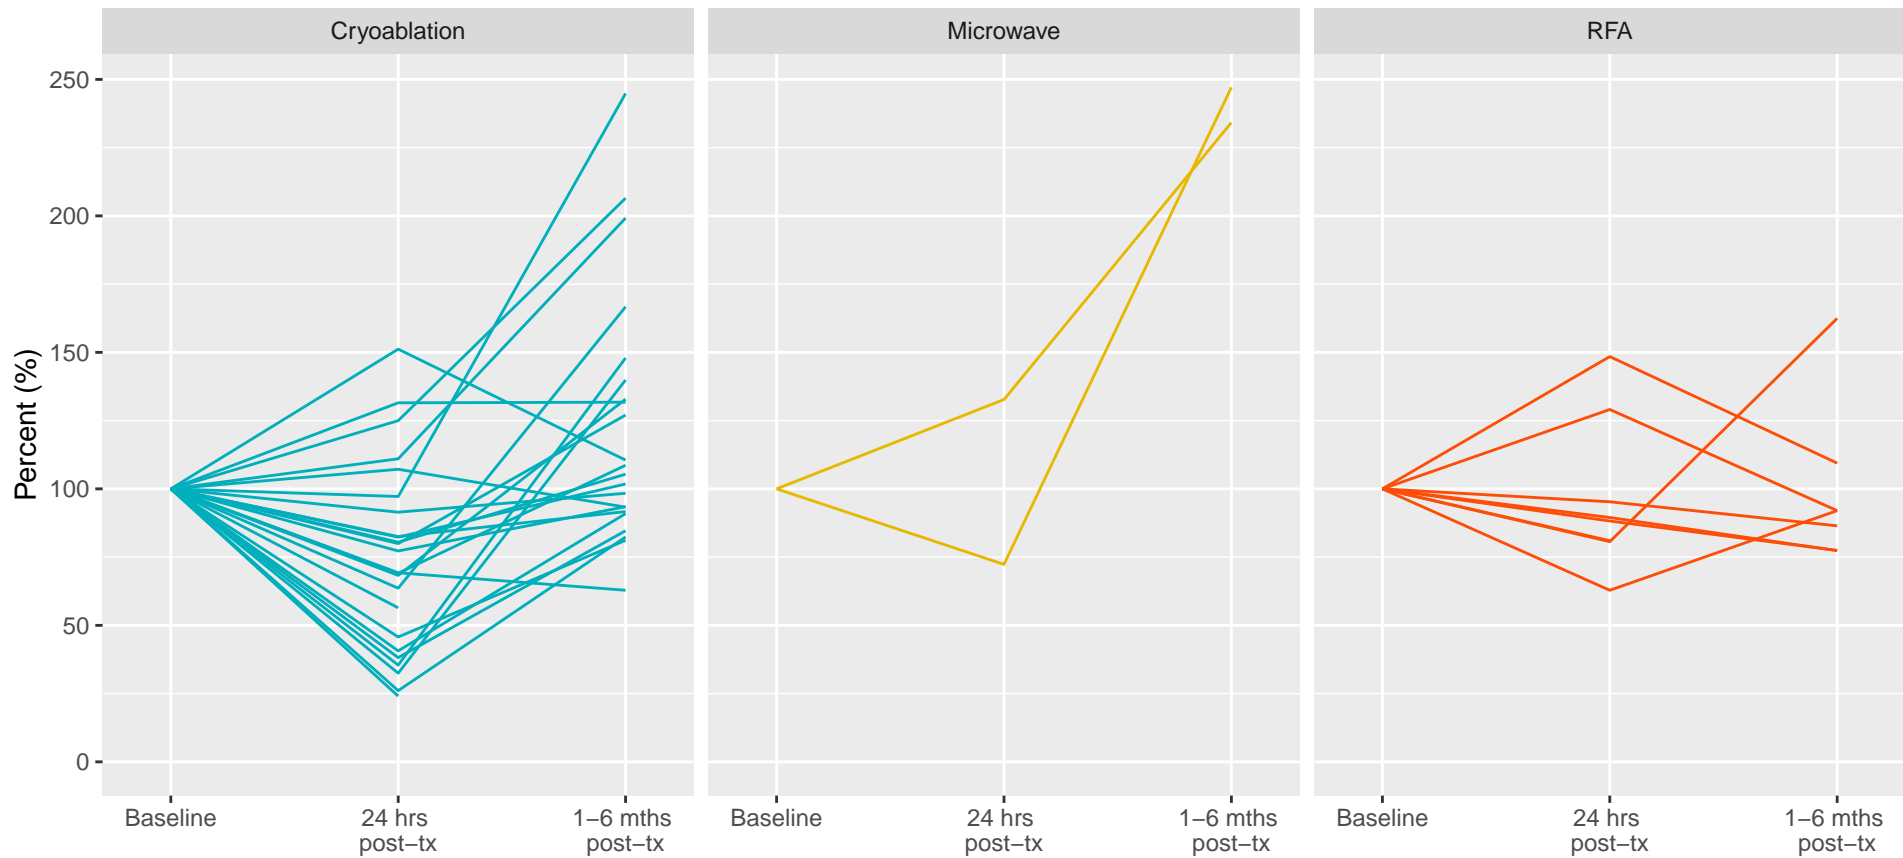

Uniprot ID: P80075, analyte: MCP-2

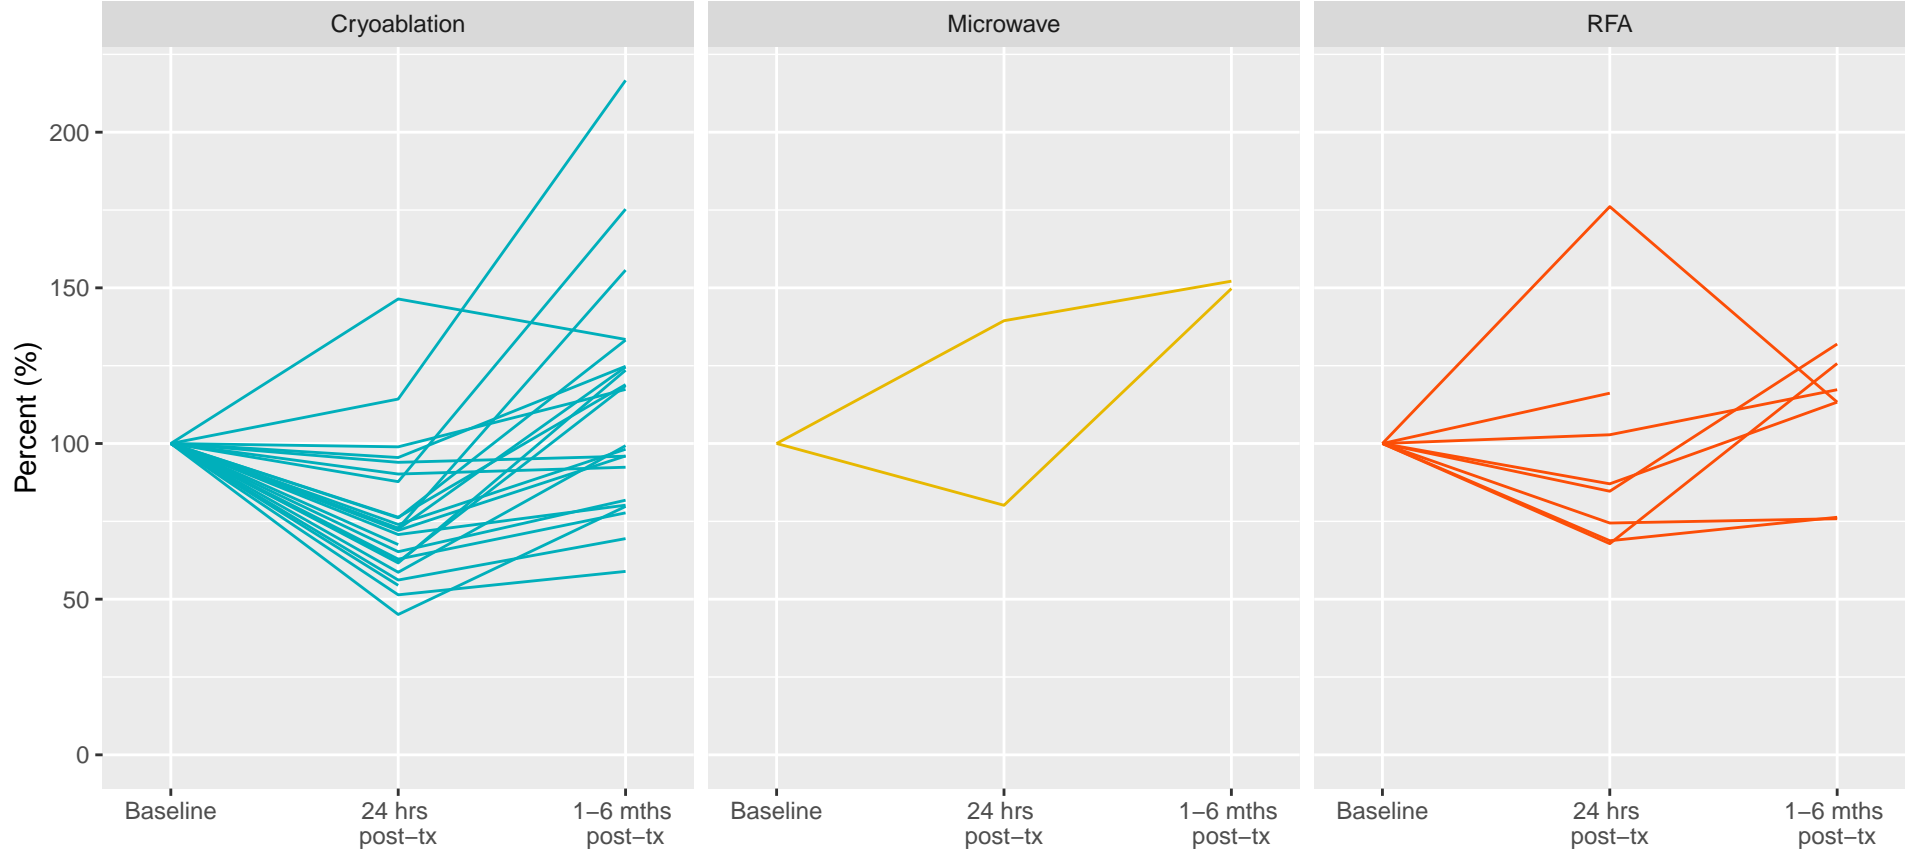

Uniprot ID: P13236, analyte: CCL4

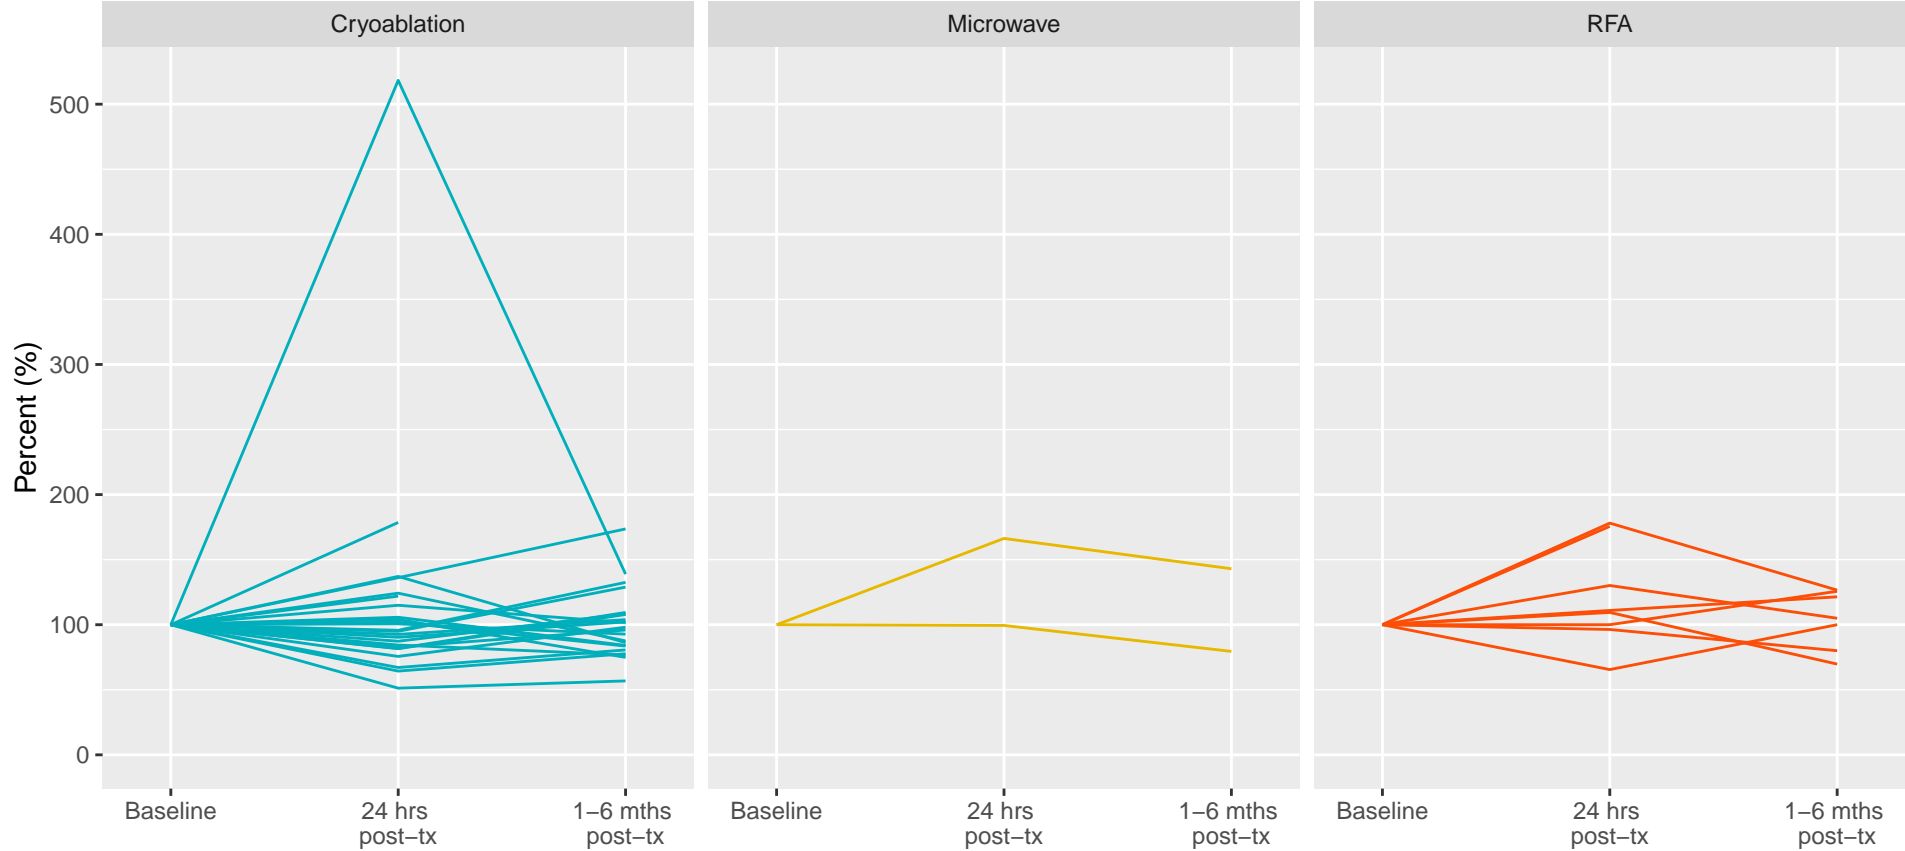

Uniprot ID: P40933, analyte: IL15

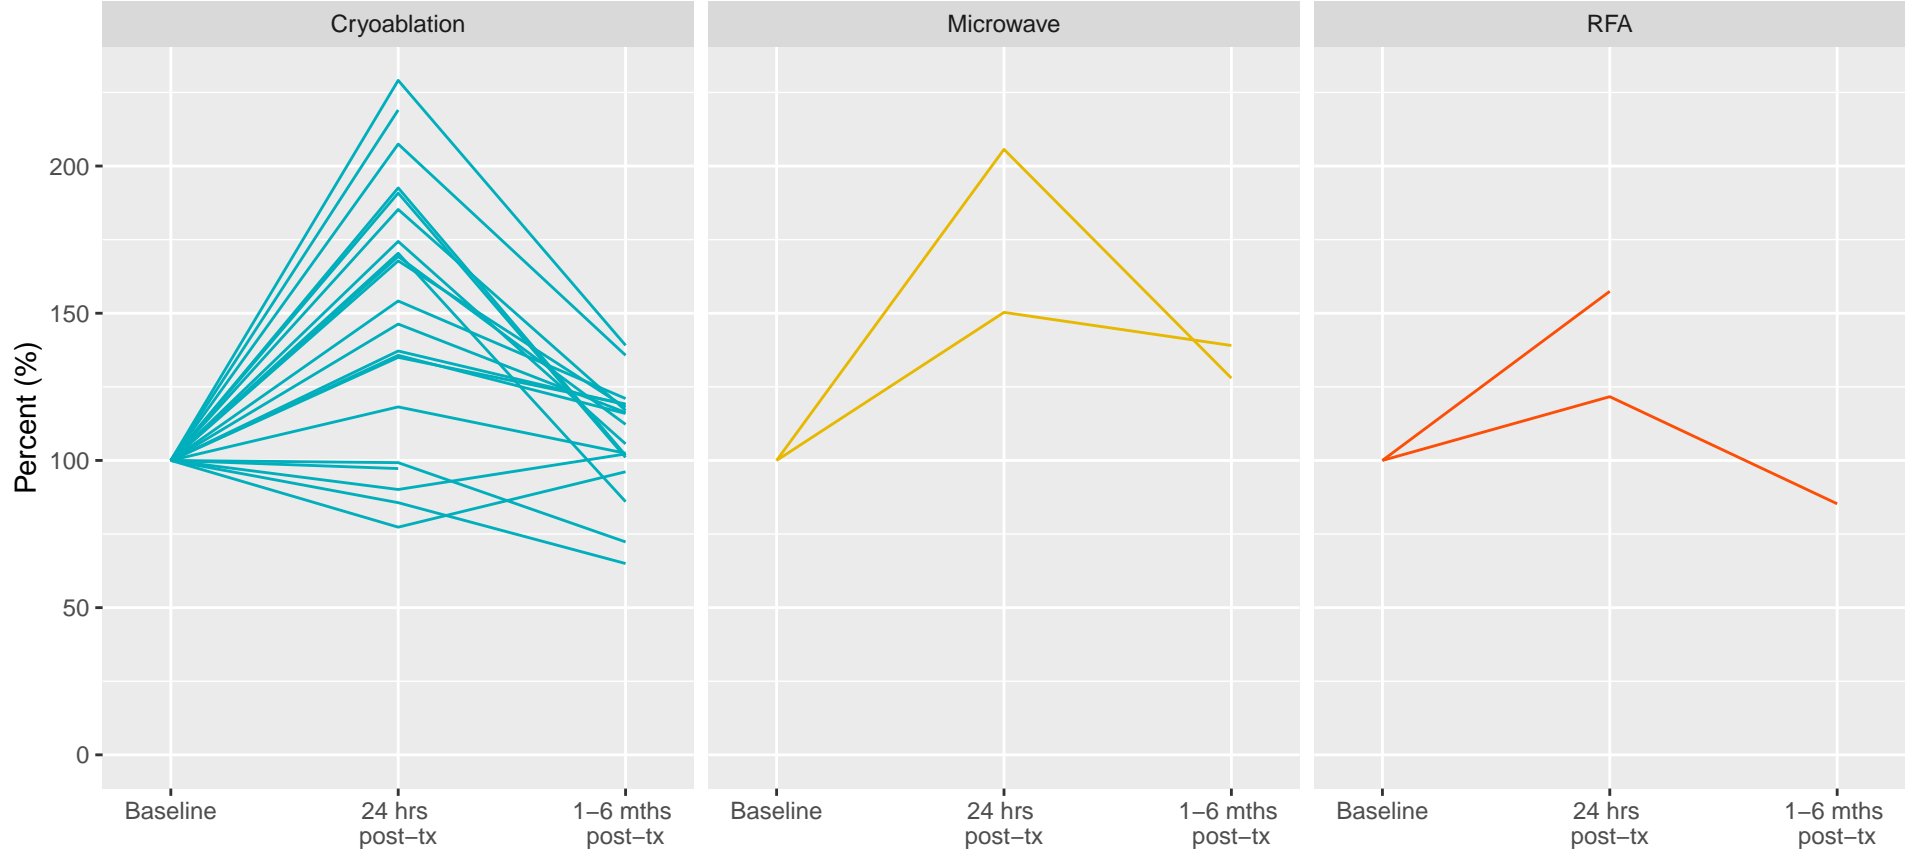

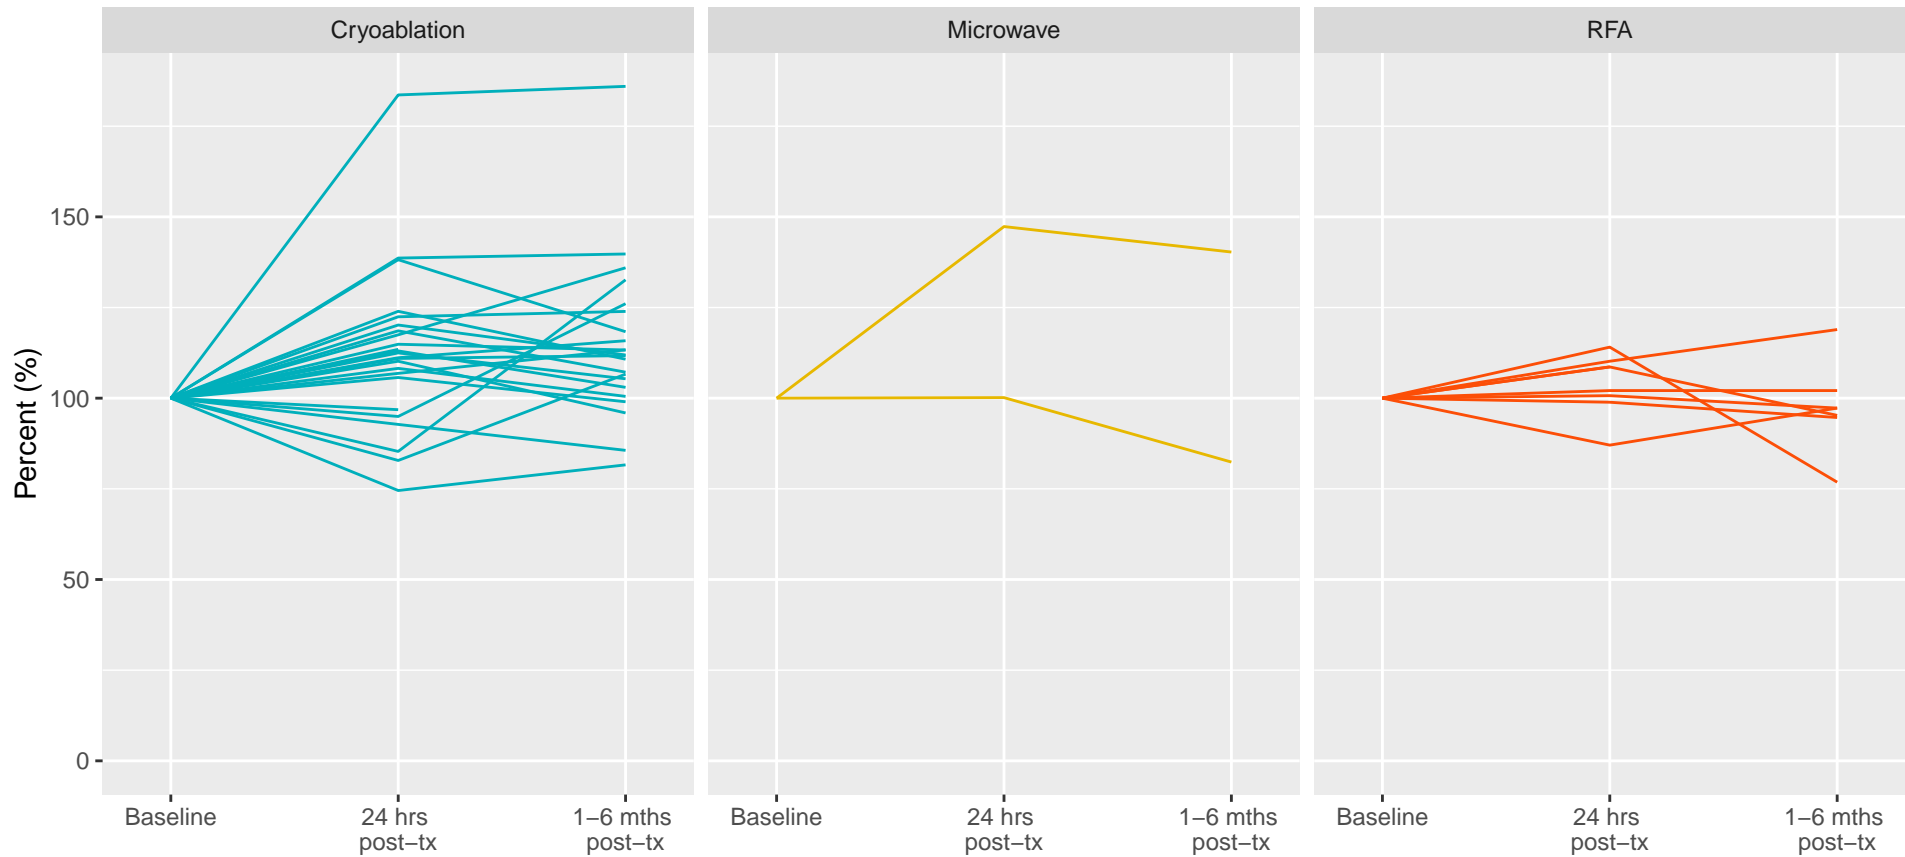

# Uniprot ID: Q9NZQ7, analyte: PD-L1

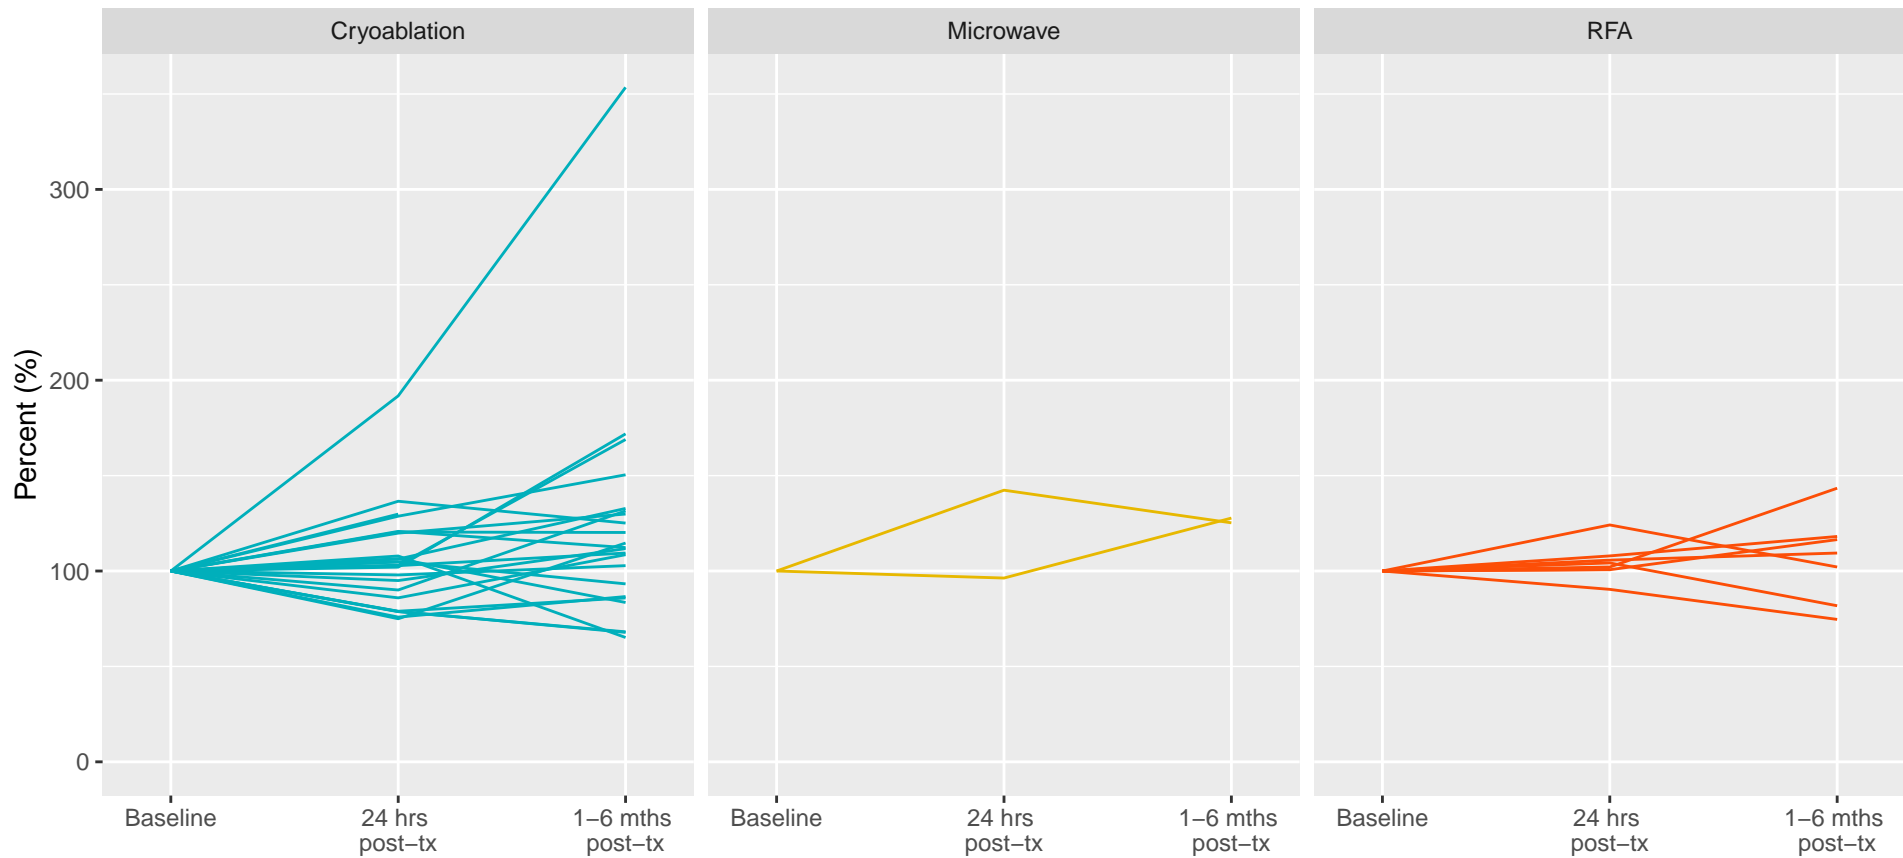

## Uniprot ID: P26842, analyte: CD27

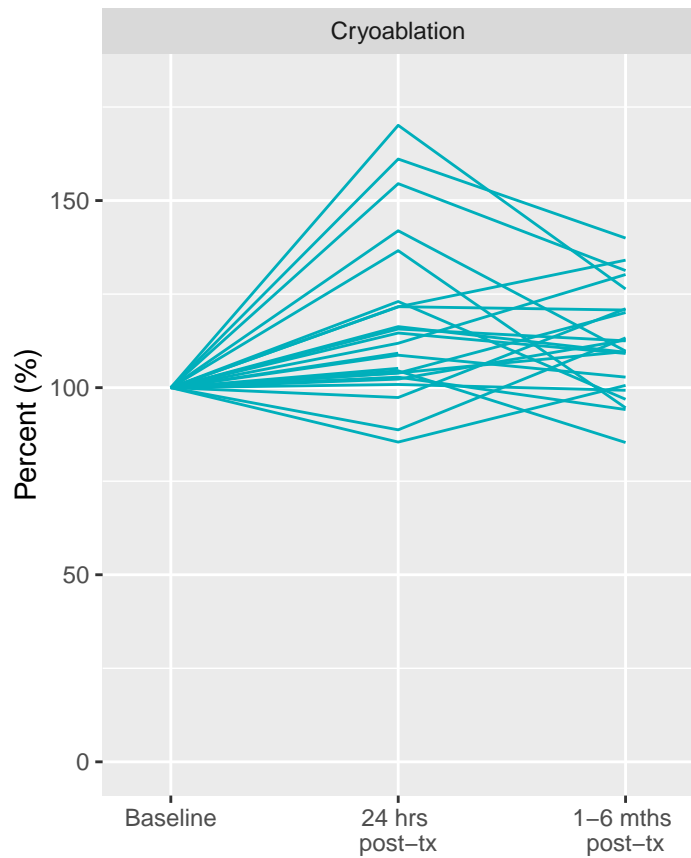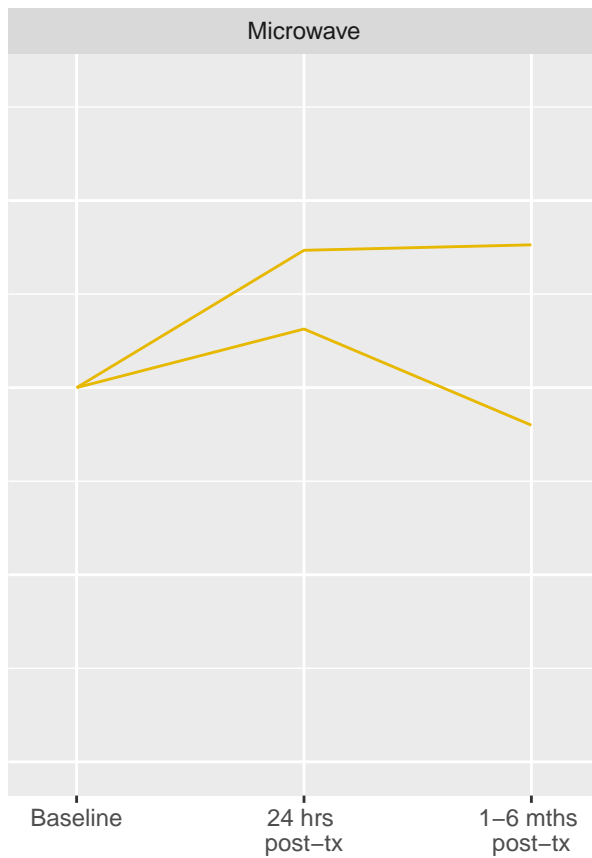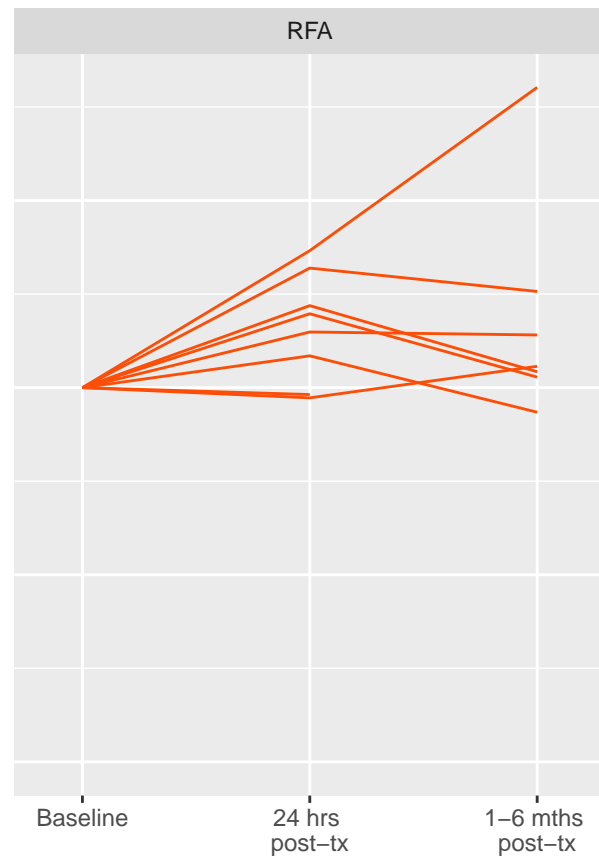

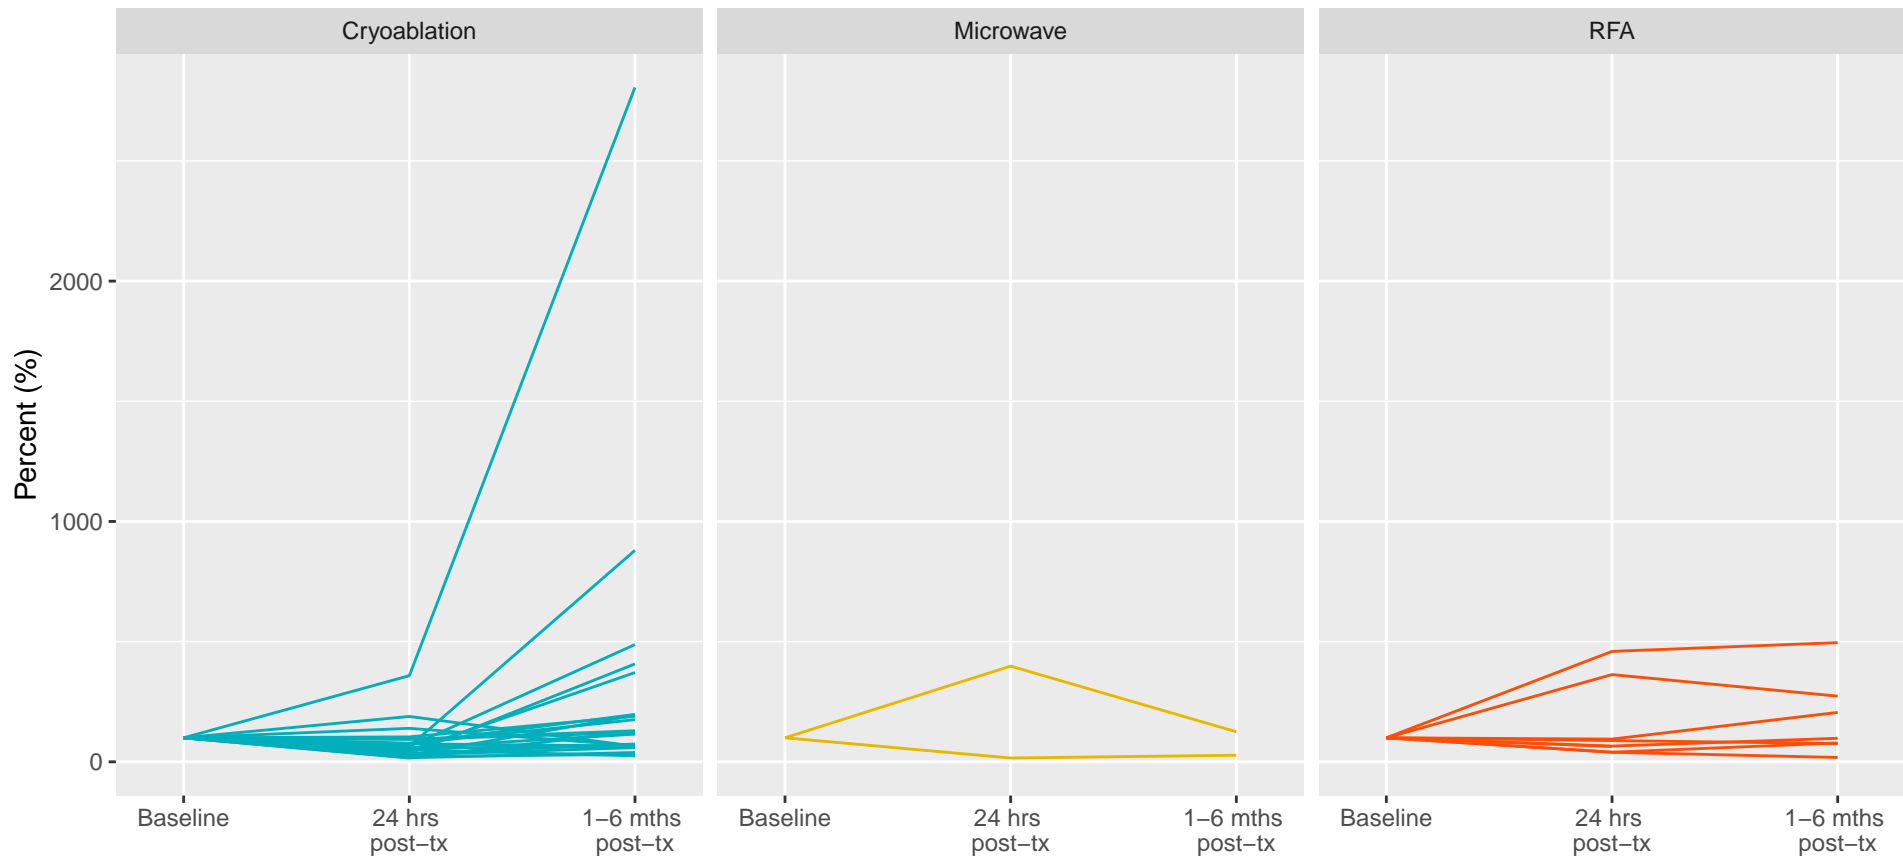



Uniprot ID: P05113, analyte: IL5

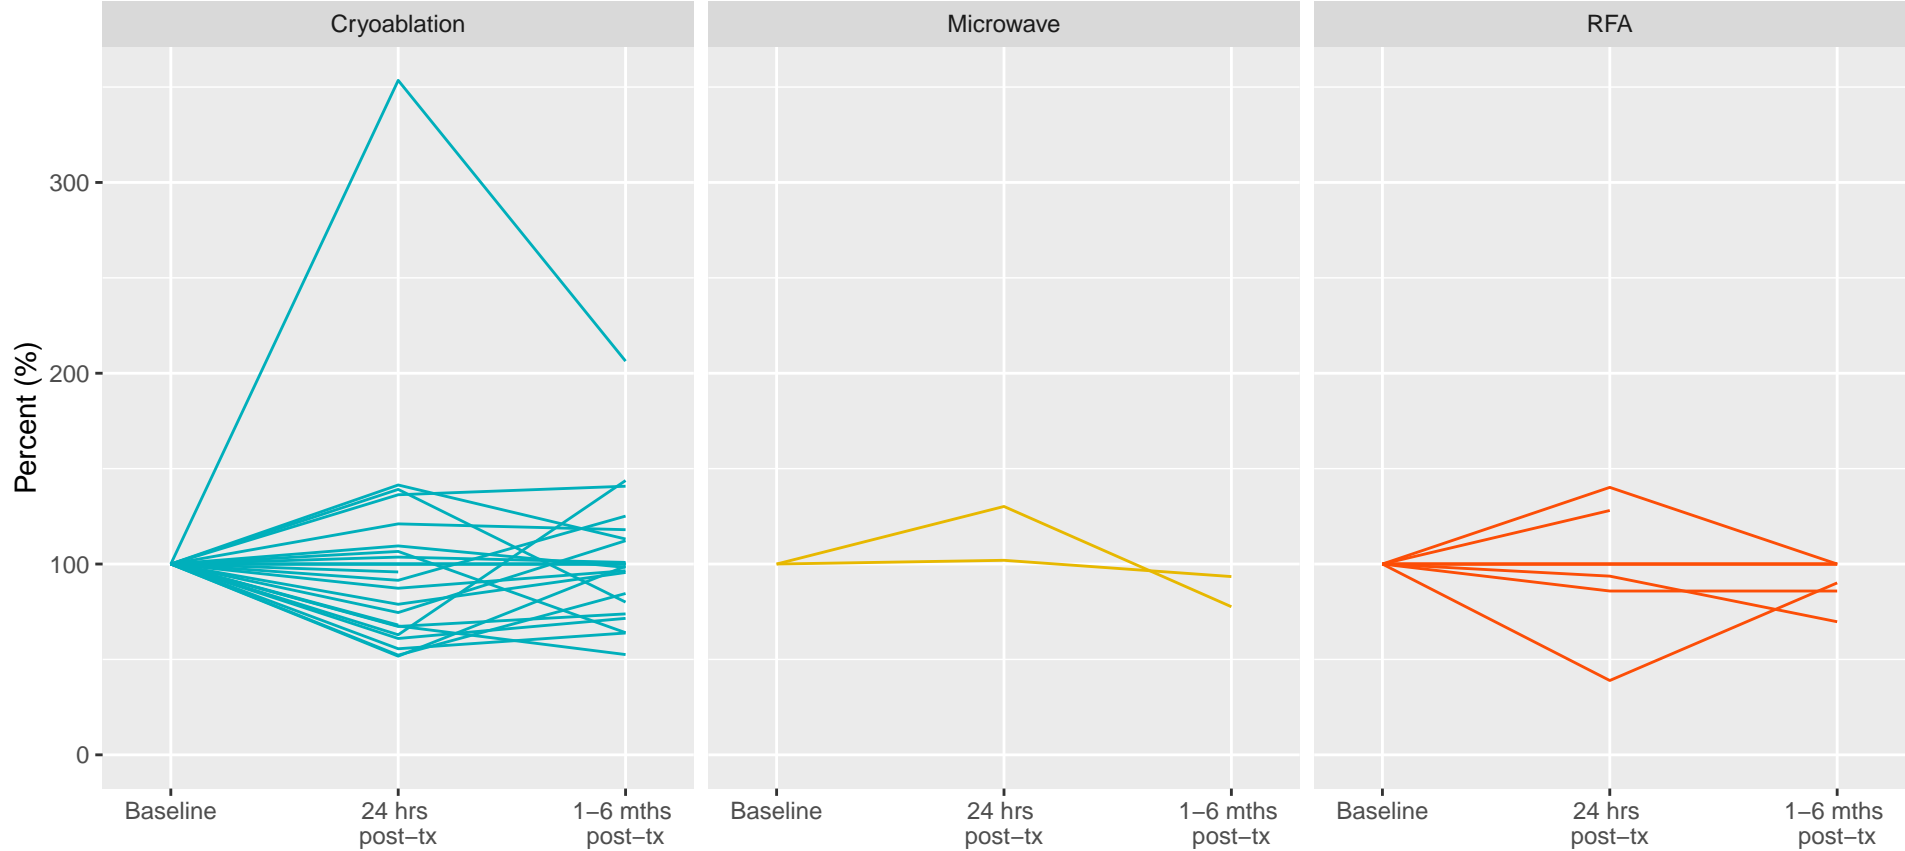

Uniprot ID: P14210, analyte: HGF

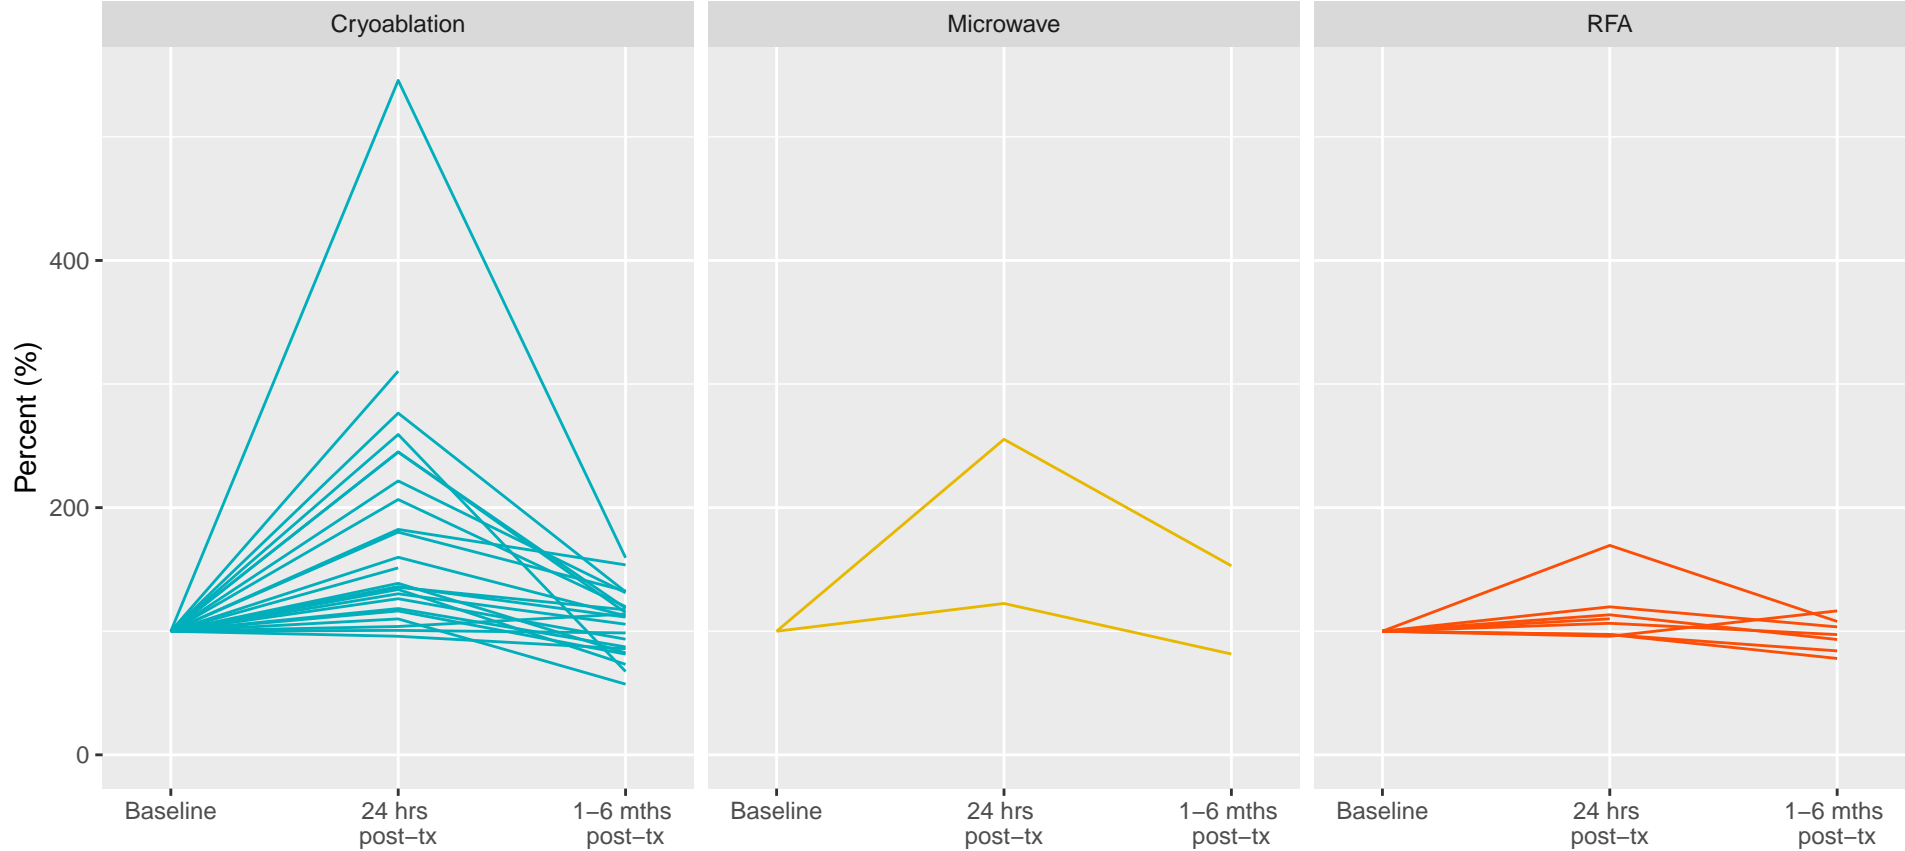

Uniprot ID: P12544, analyte: GZMA

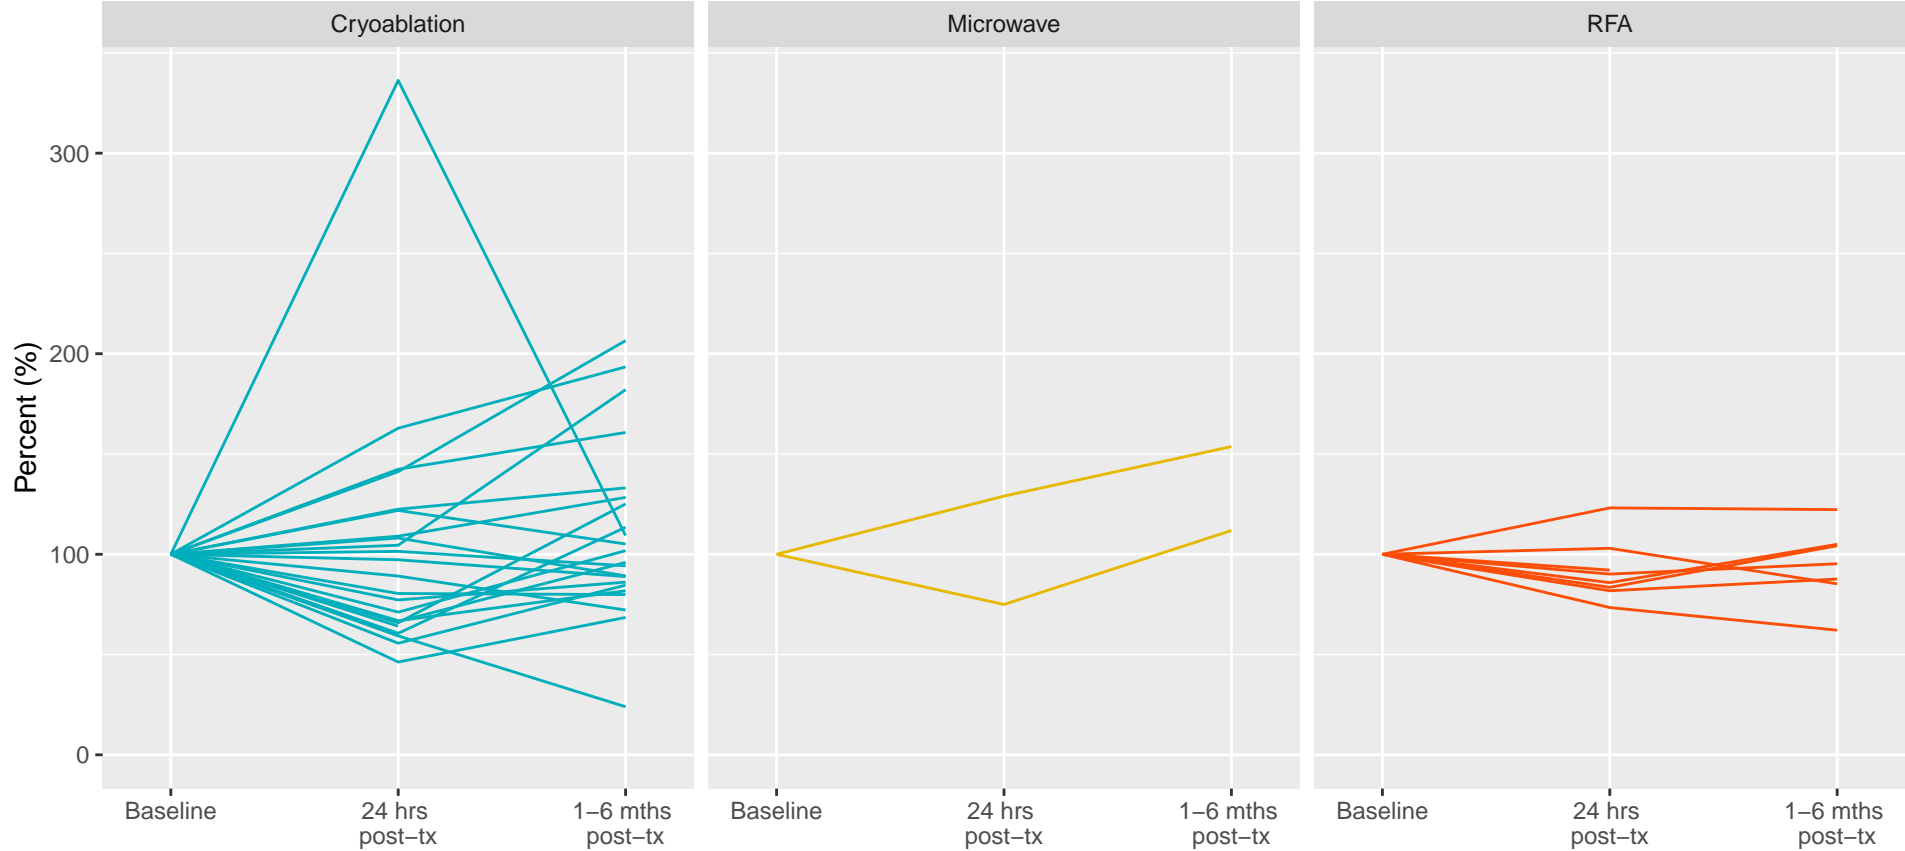

Uniprot ID: P09601, analyte: HO-1

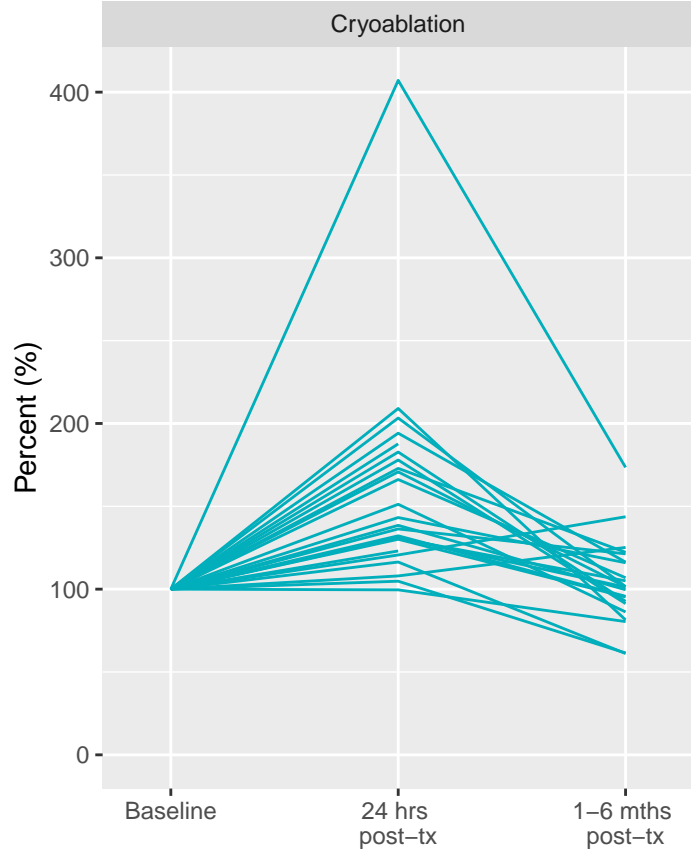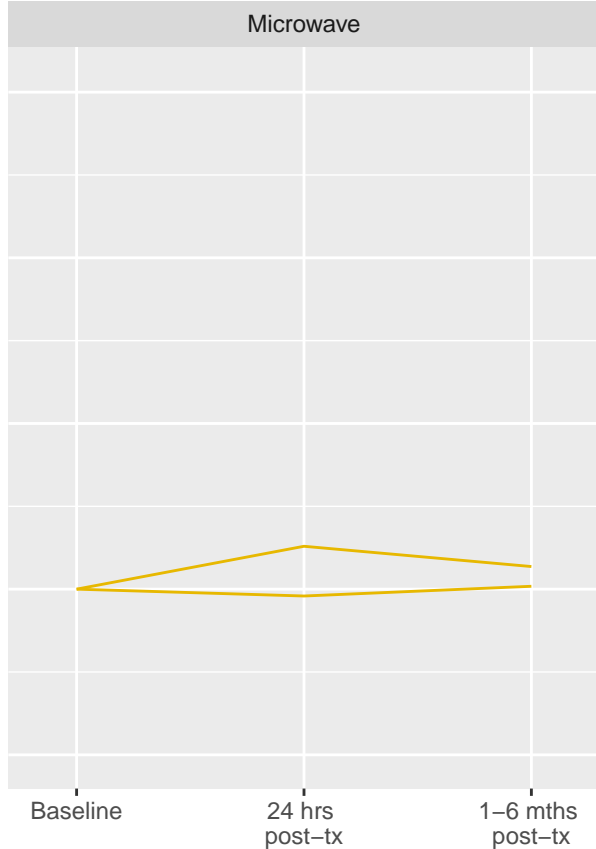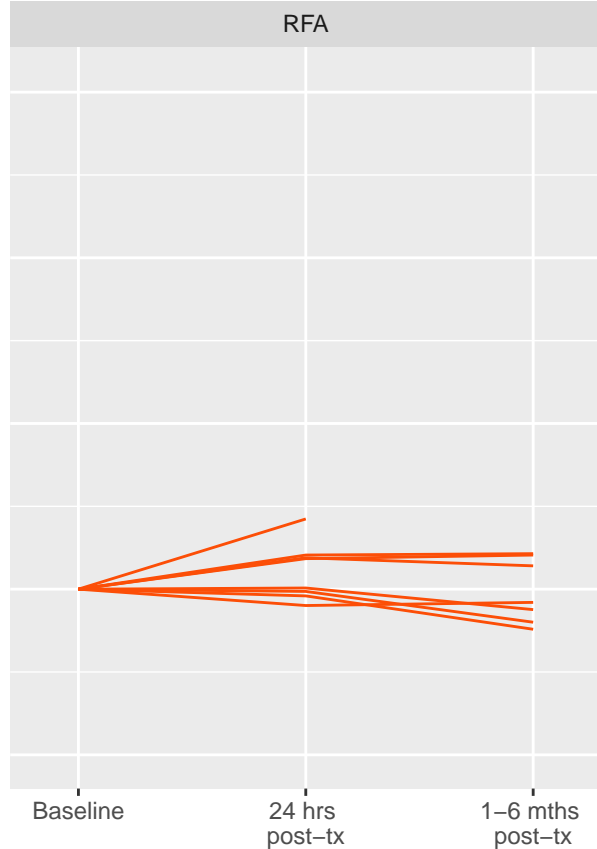

# Uniprot ID: P78423, analyte: CX3CL1

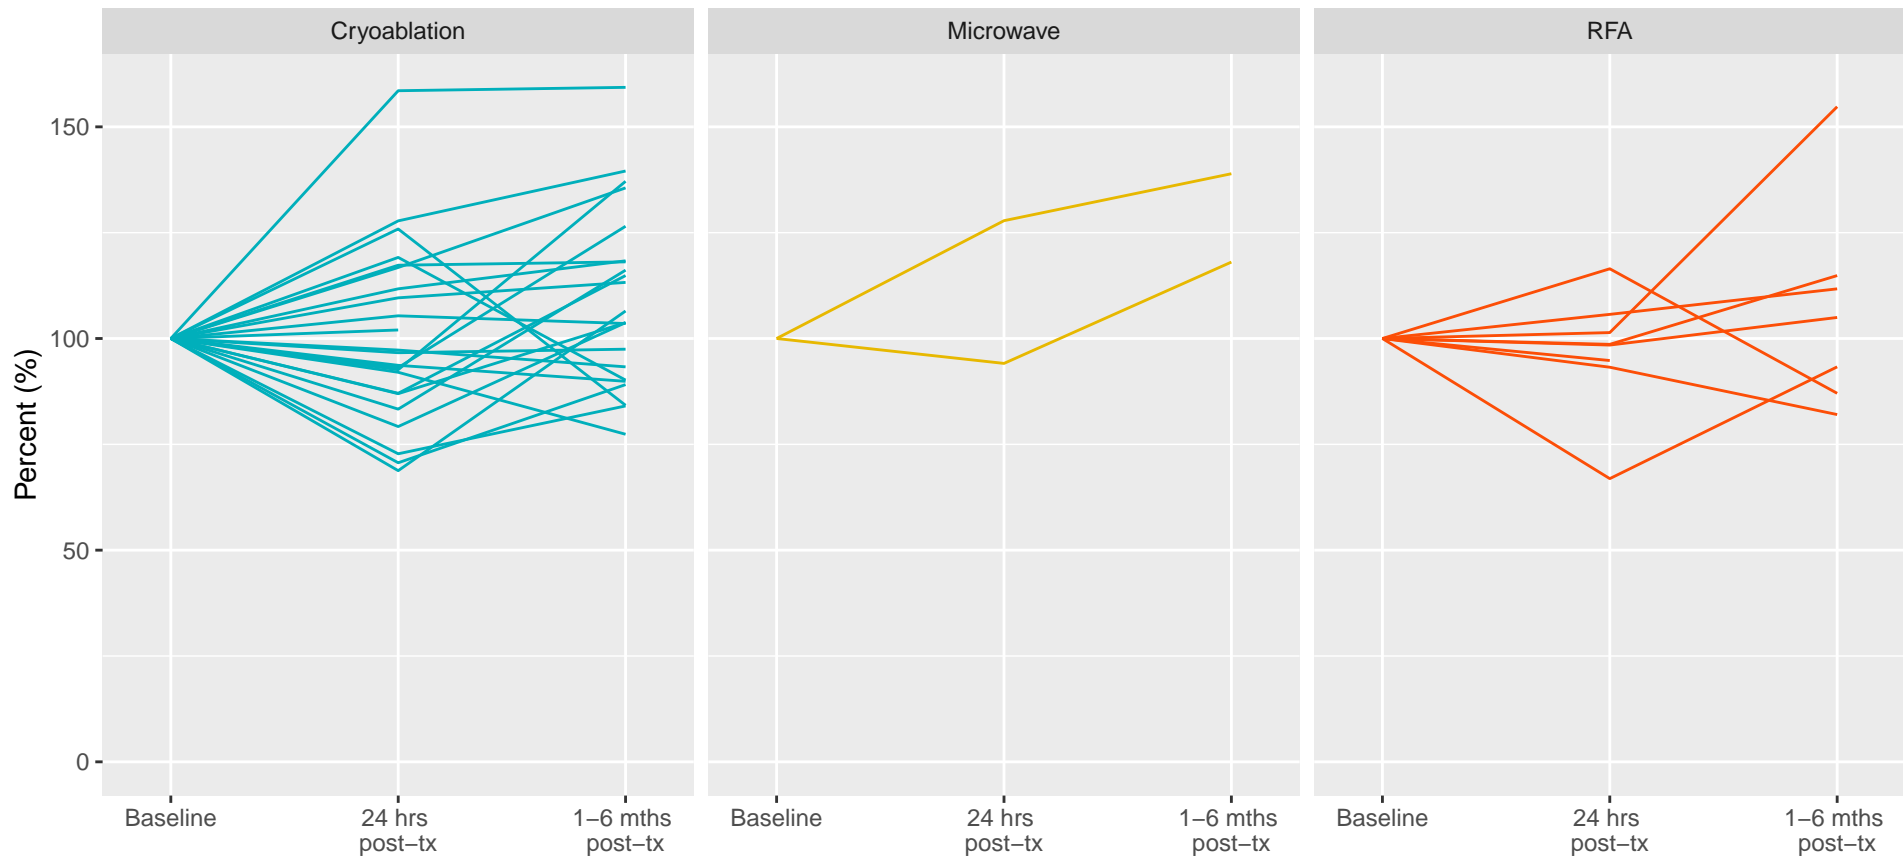

Uniprot ID: P02778, analyte: CXCL10

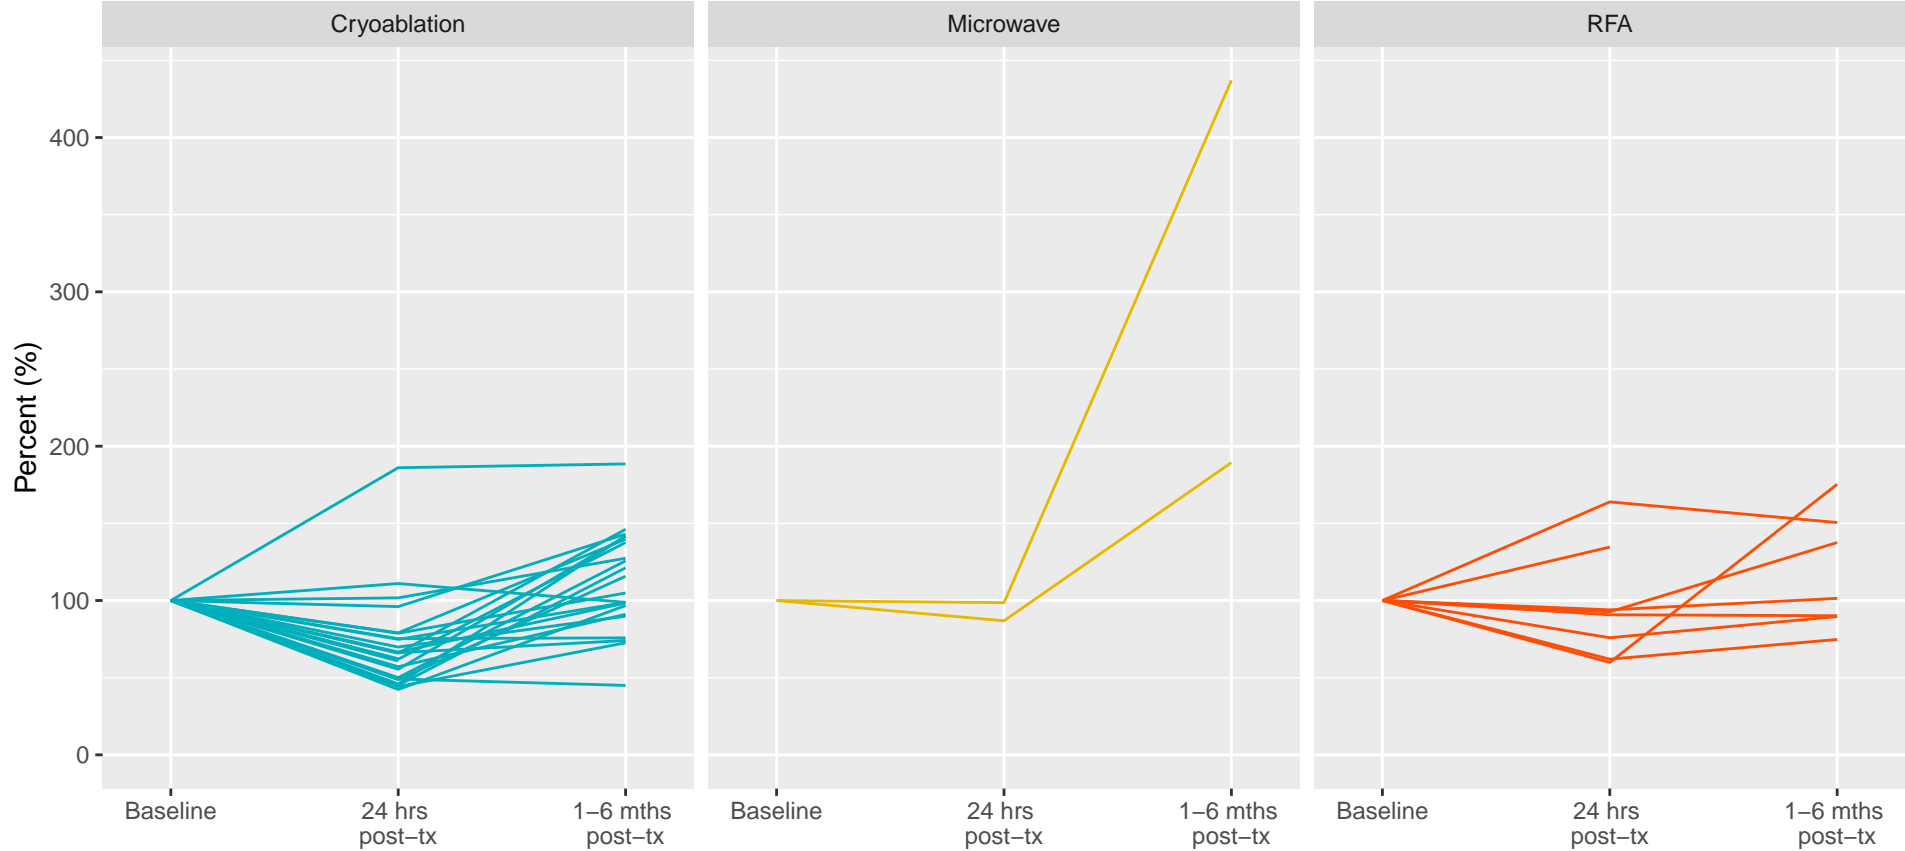

Uniprot ID: P32970, analyte: CD70

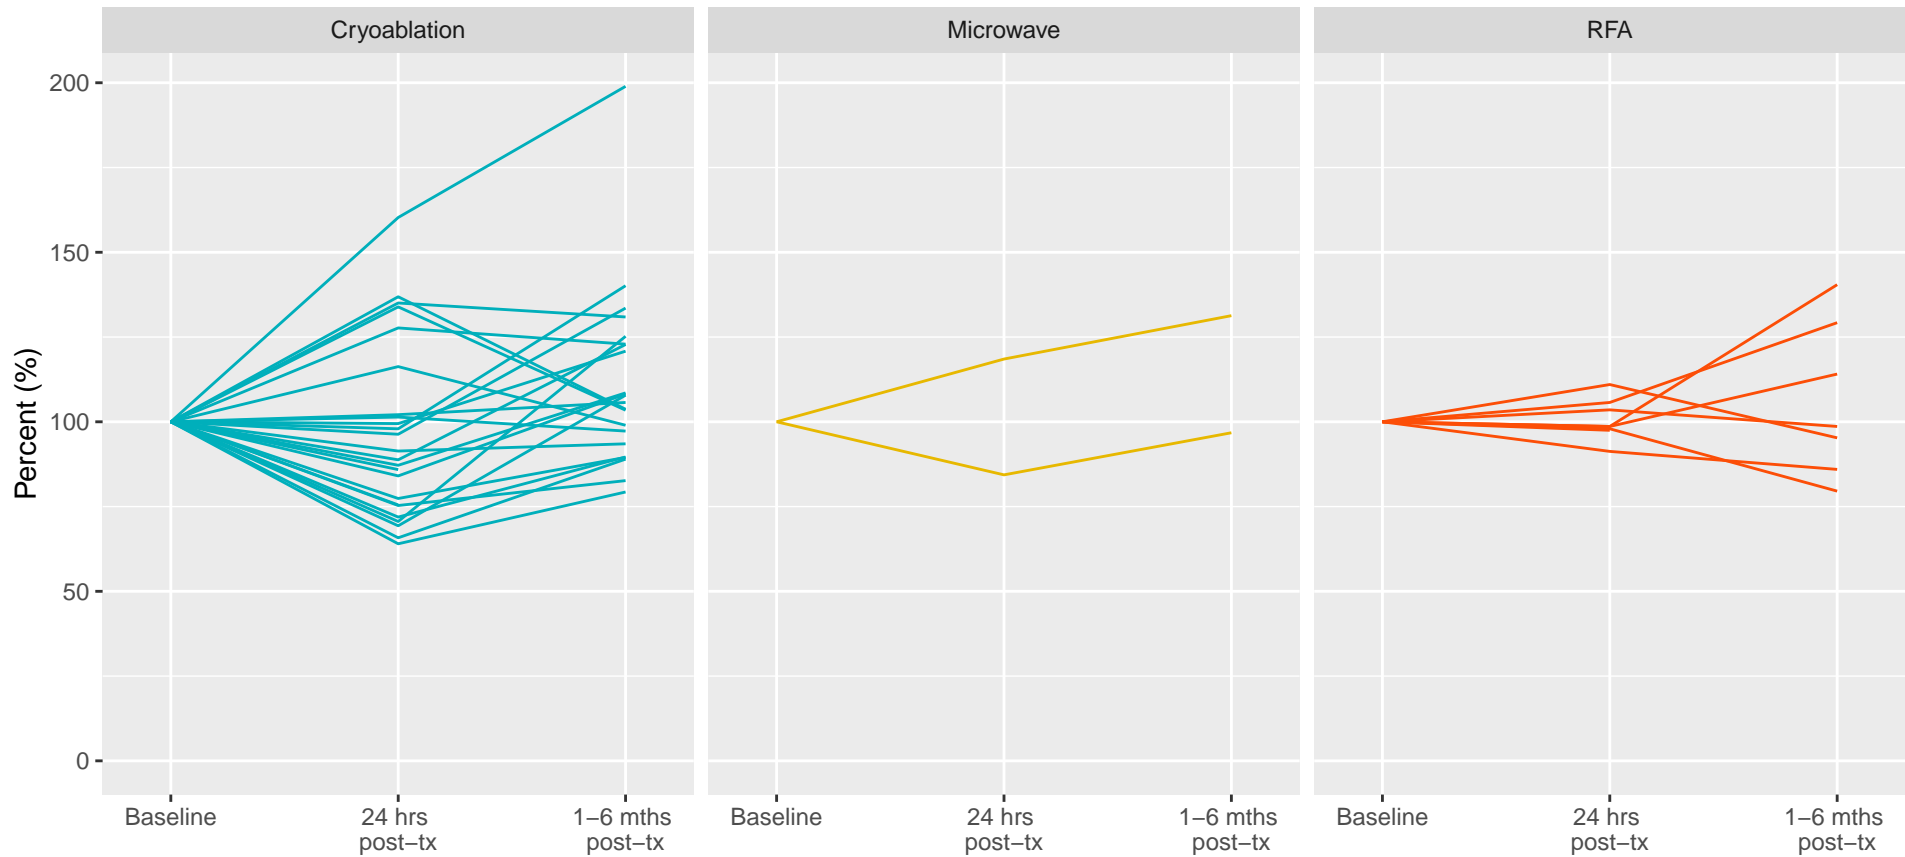

# Uniprot ID: P22301, analyte: IL10

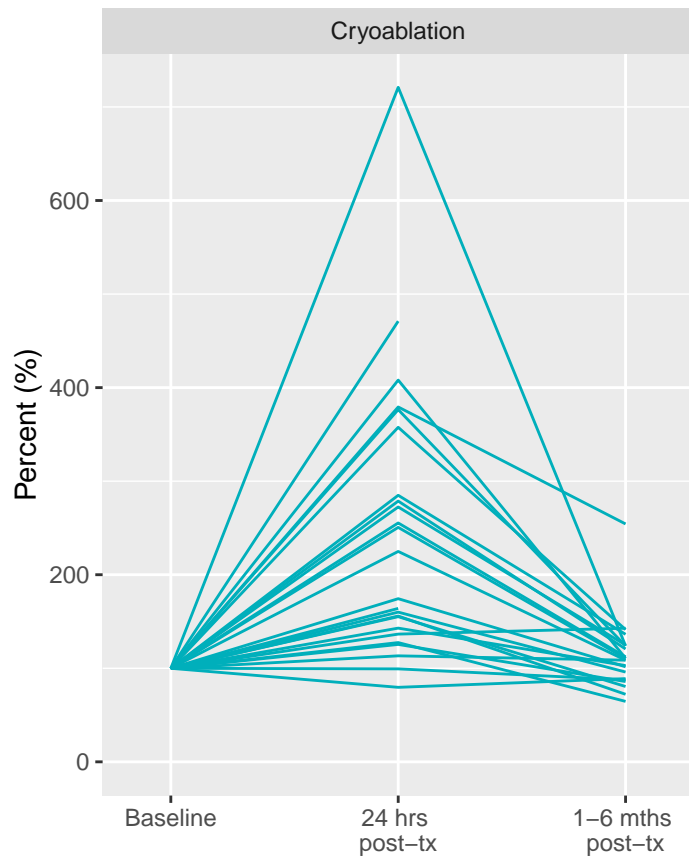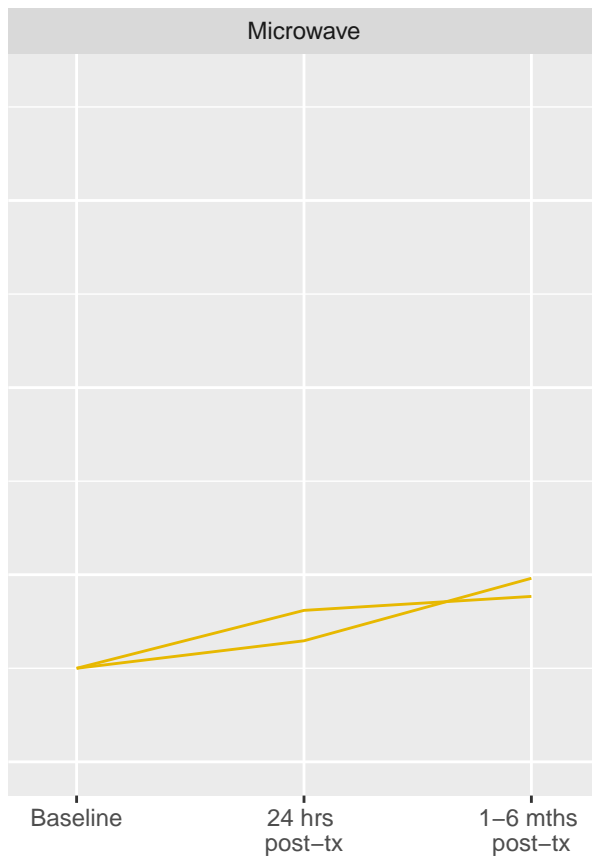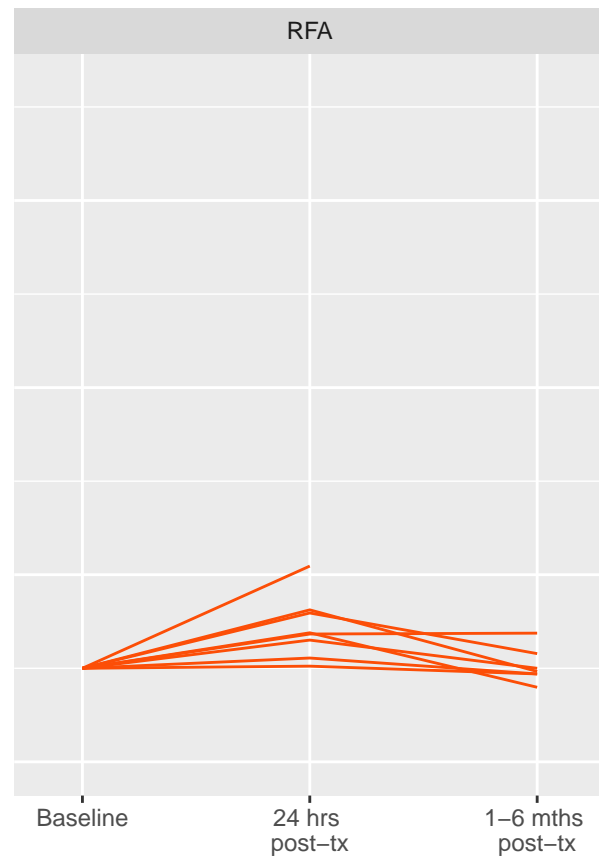



Uniprot ID: Q9NP84, analyte: TNFRSF12A

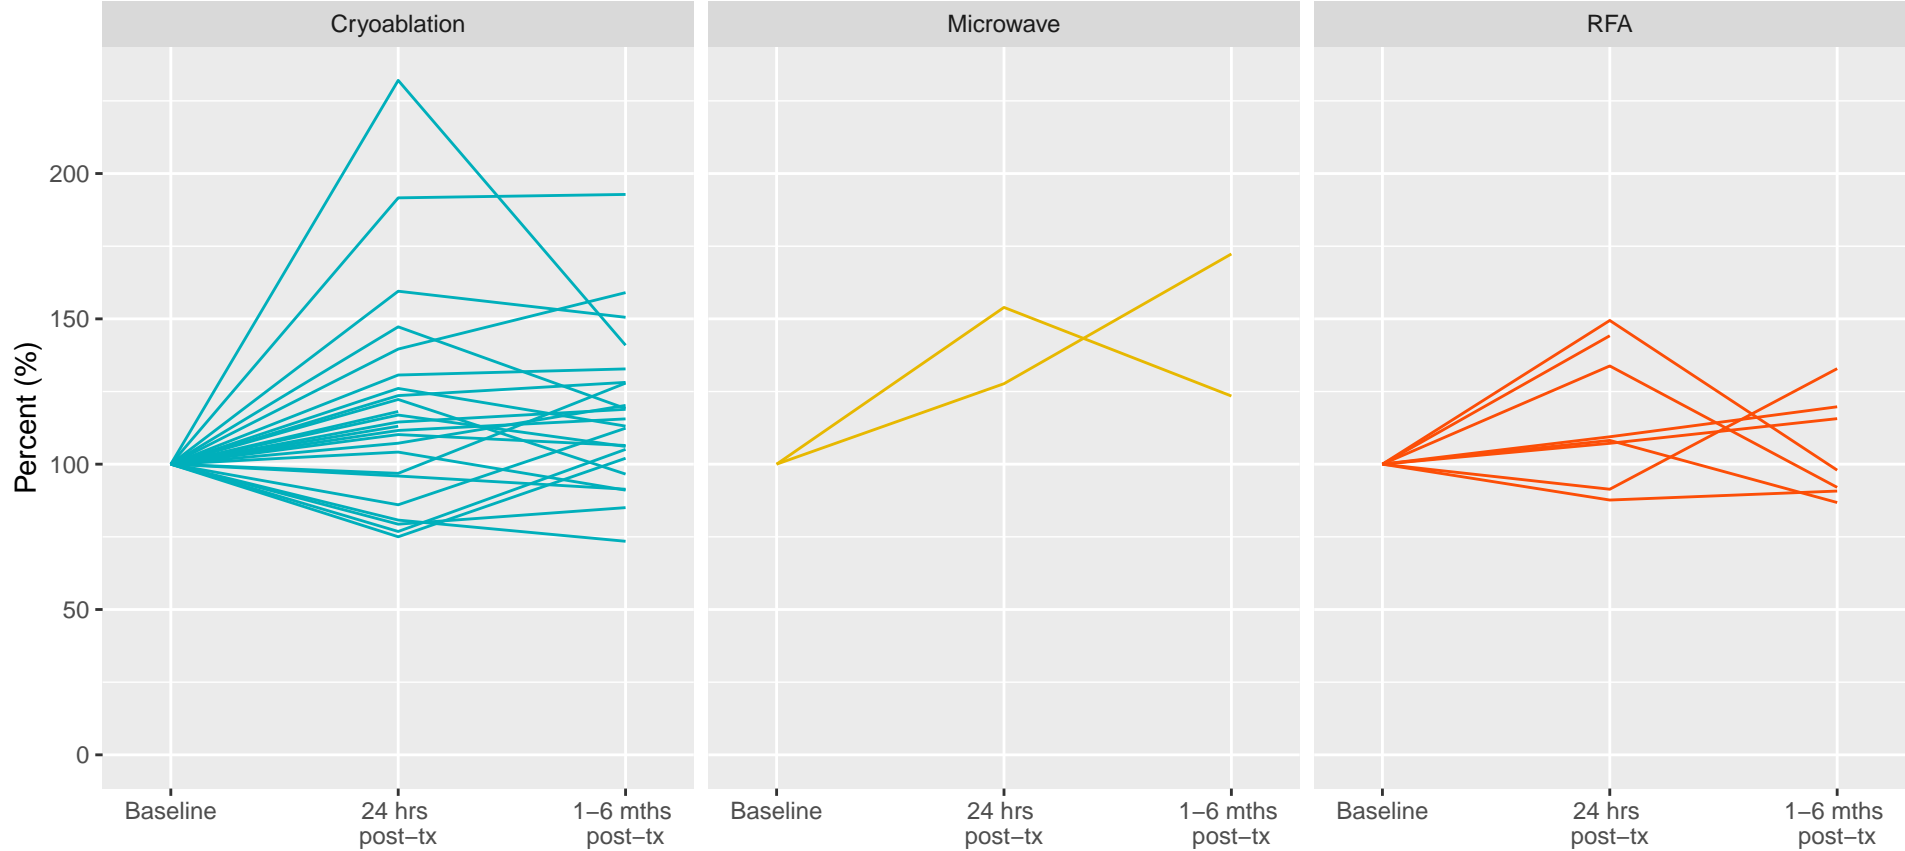

# Uniprot ID: P55773, analyte: CCL23

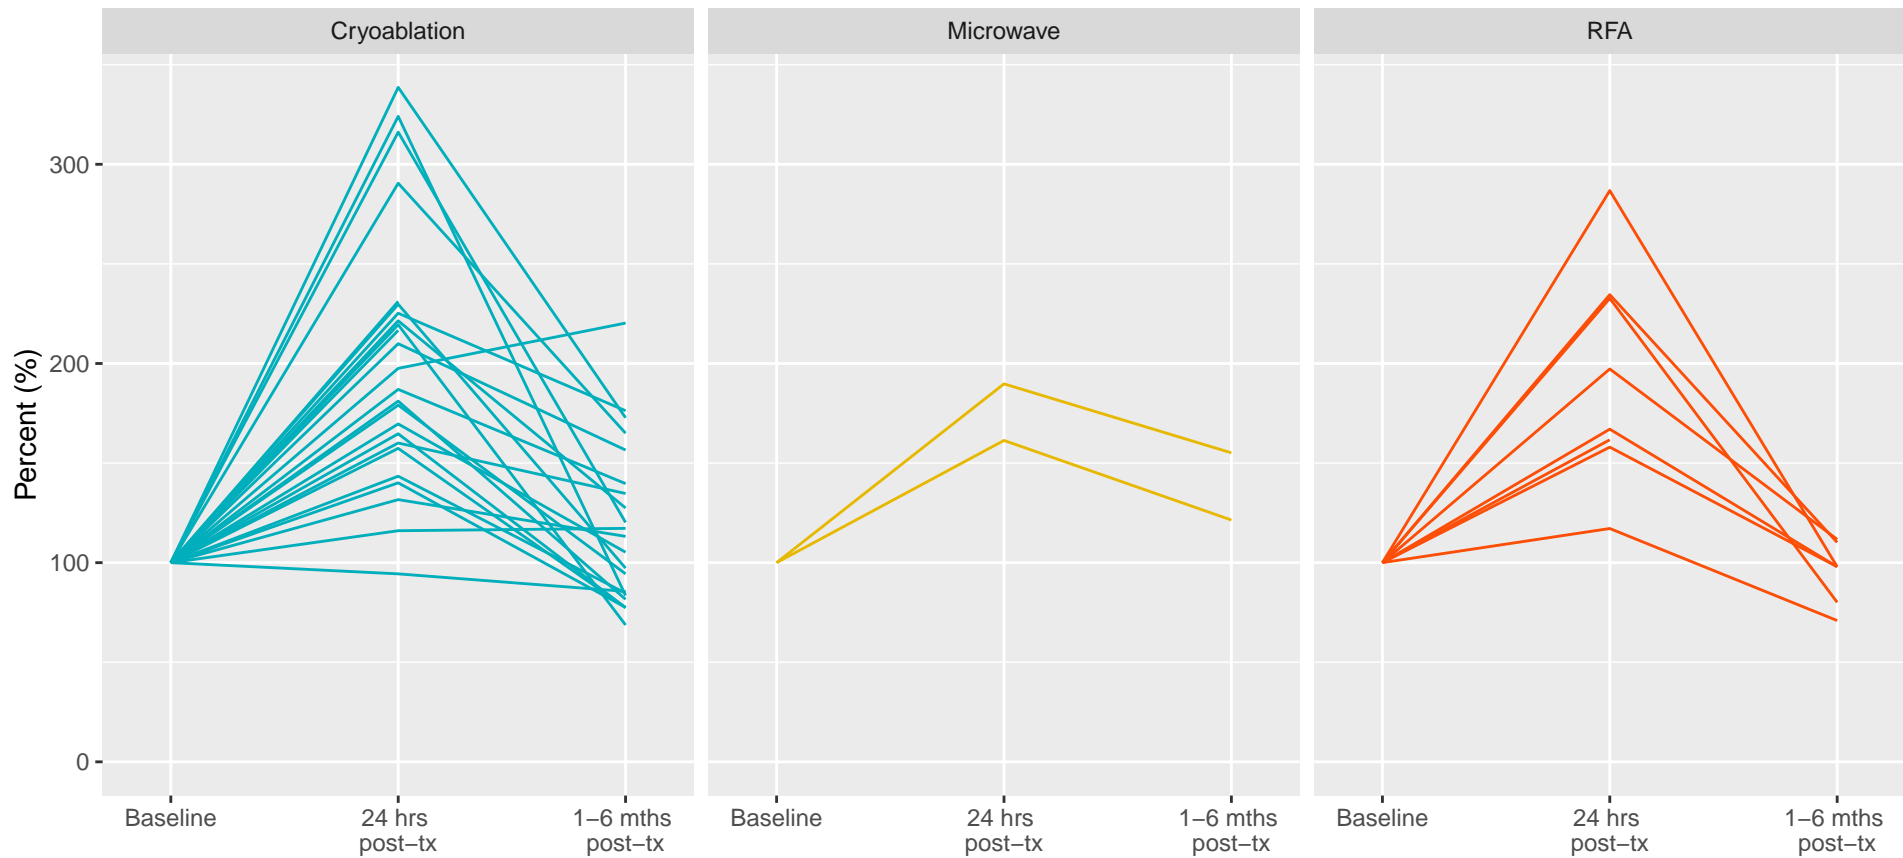

# Uniprot ID: P06127, analyte: CD5

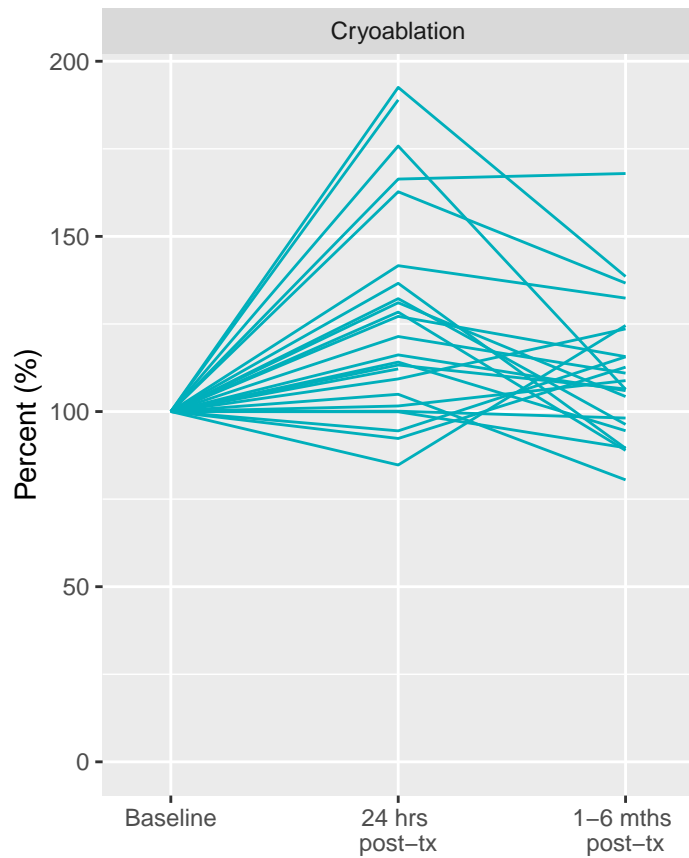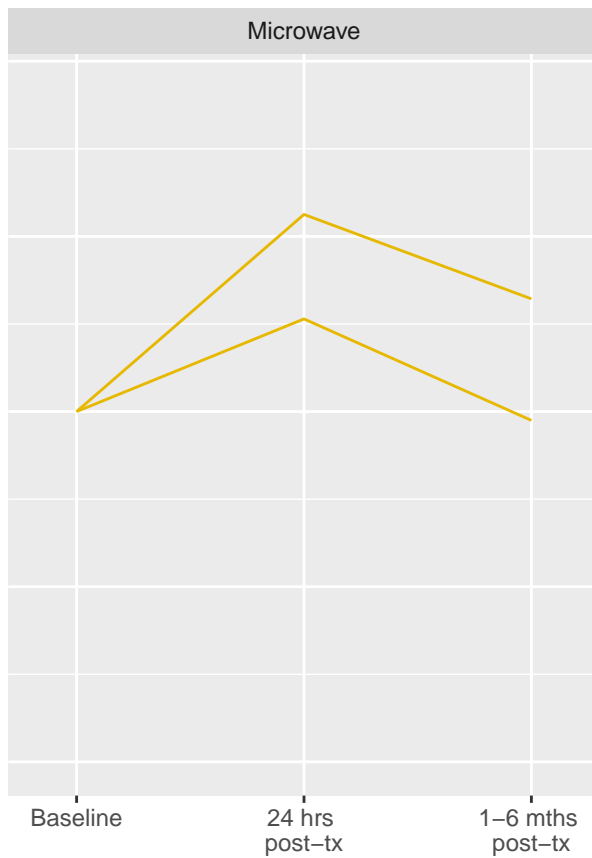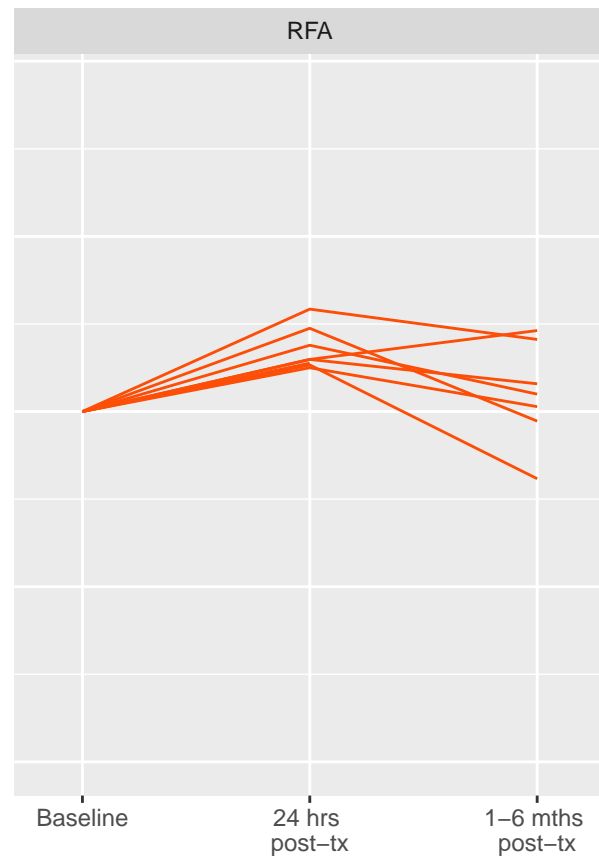

# Uniprot ID: P10147, analyte: CCL3

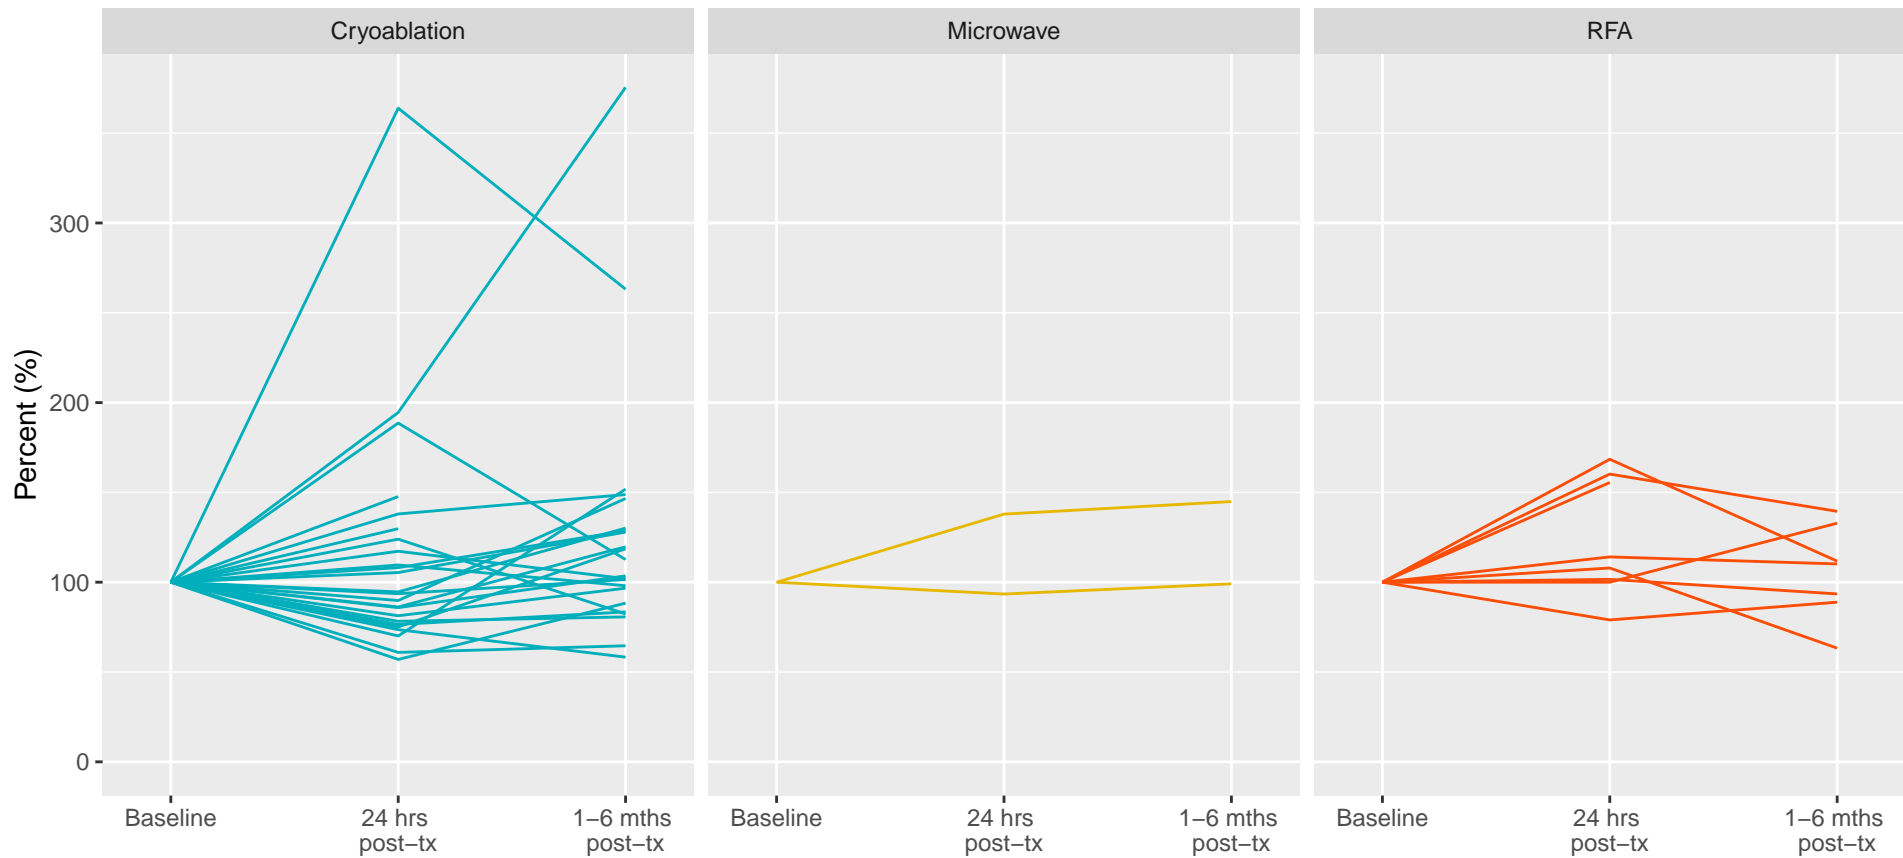



Uniprot ID: P05089, analyte: ARG1

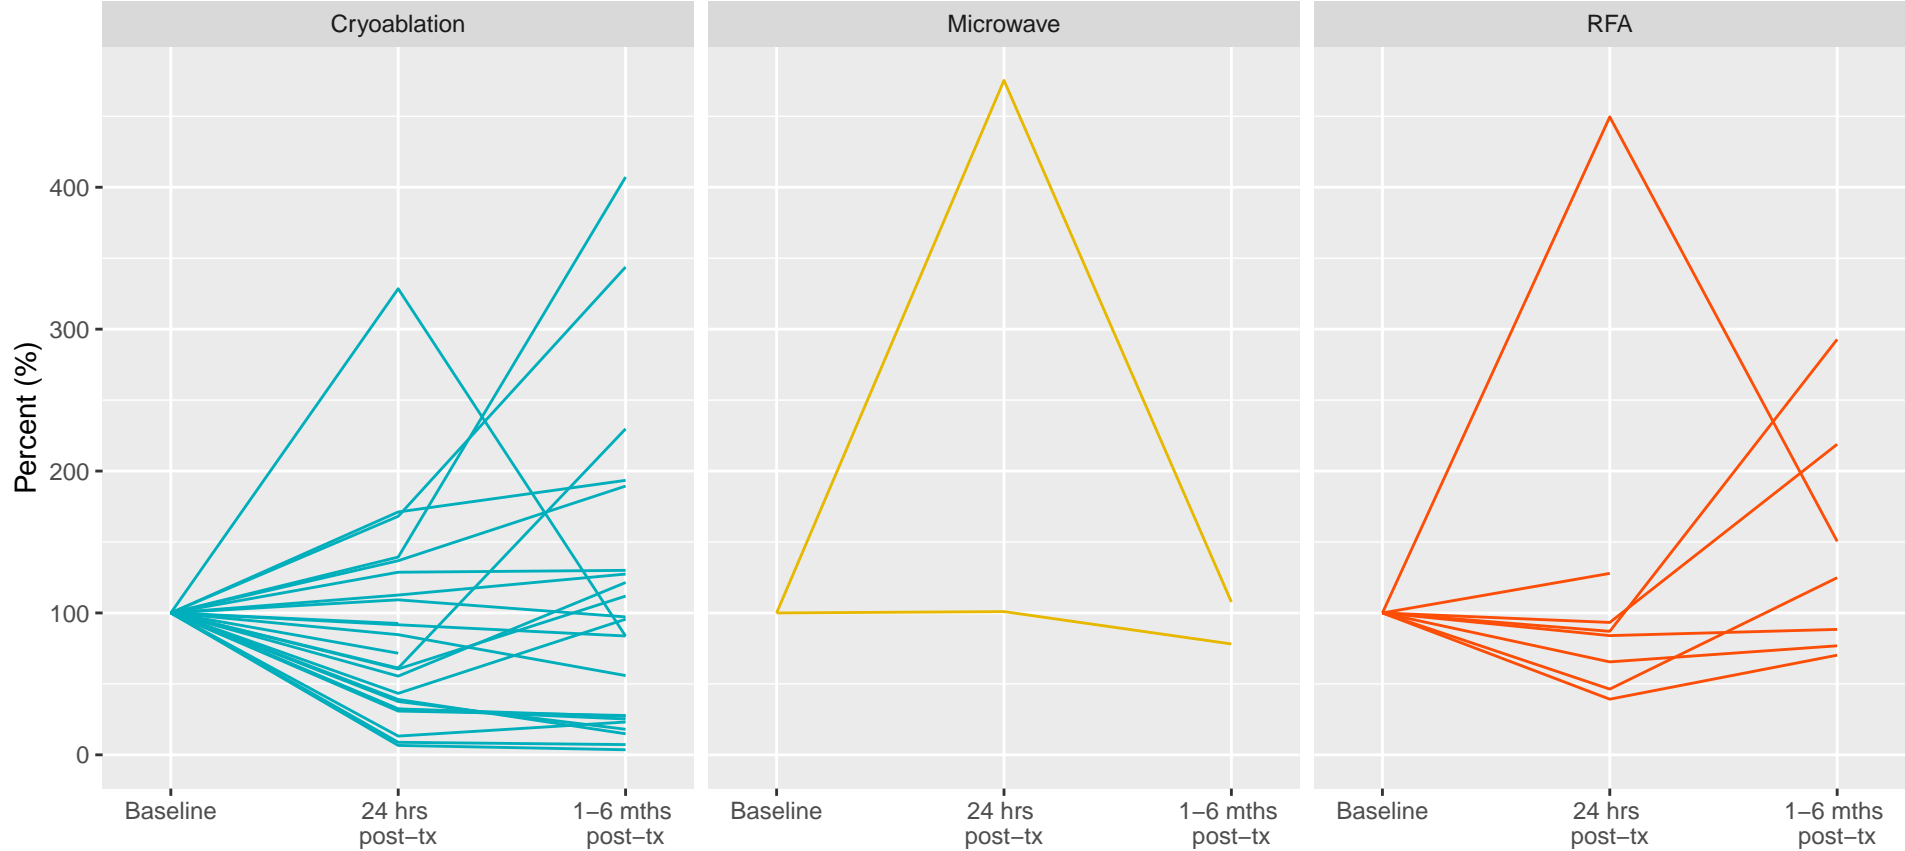

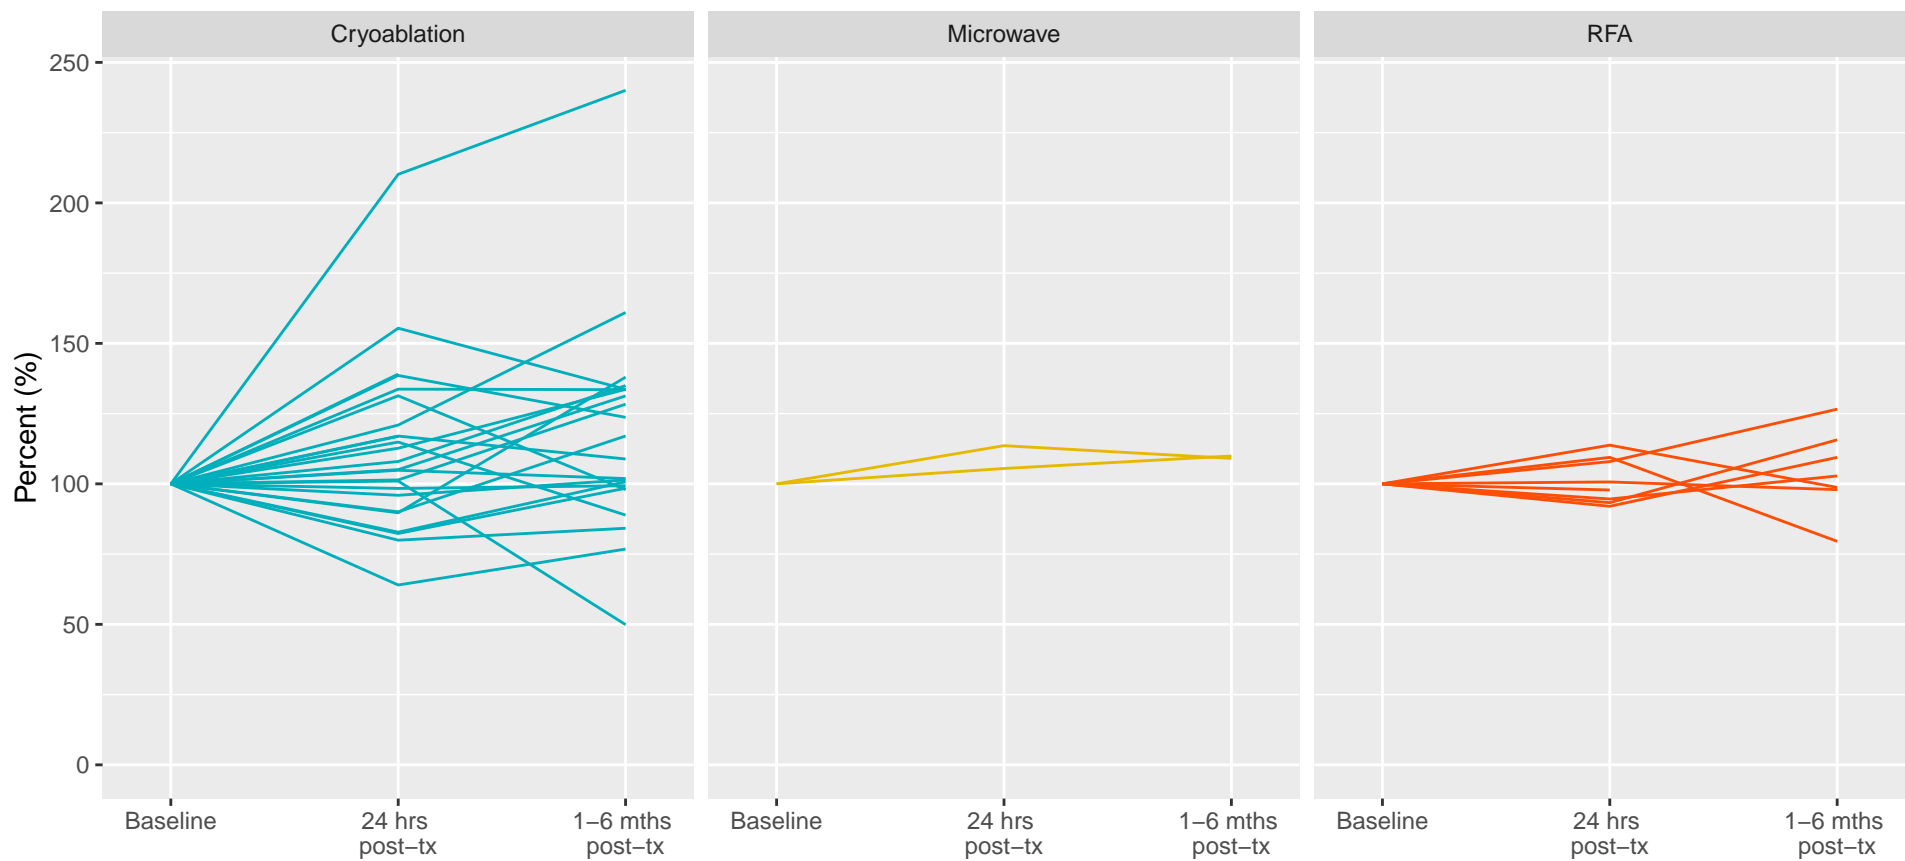

Uniprot ID: P07585, analyte: DCN

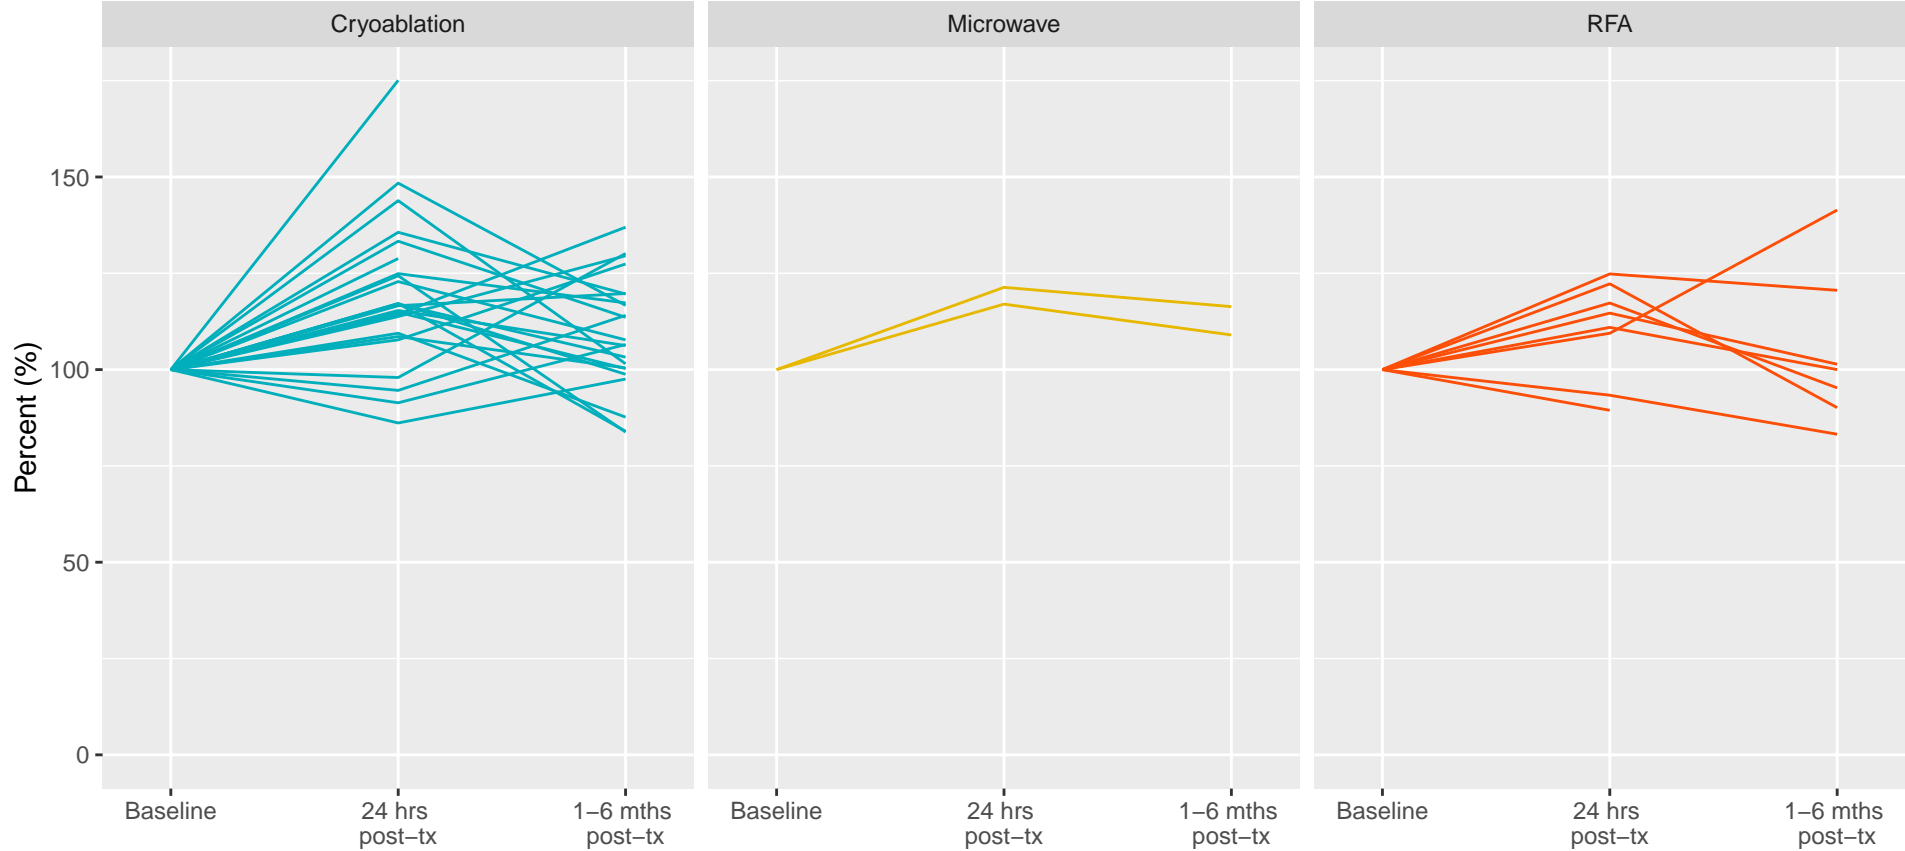



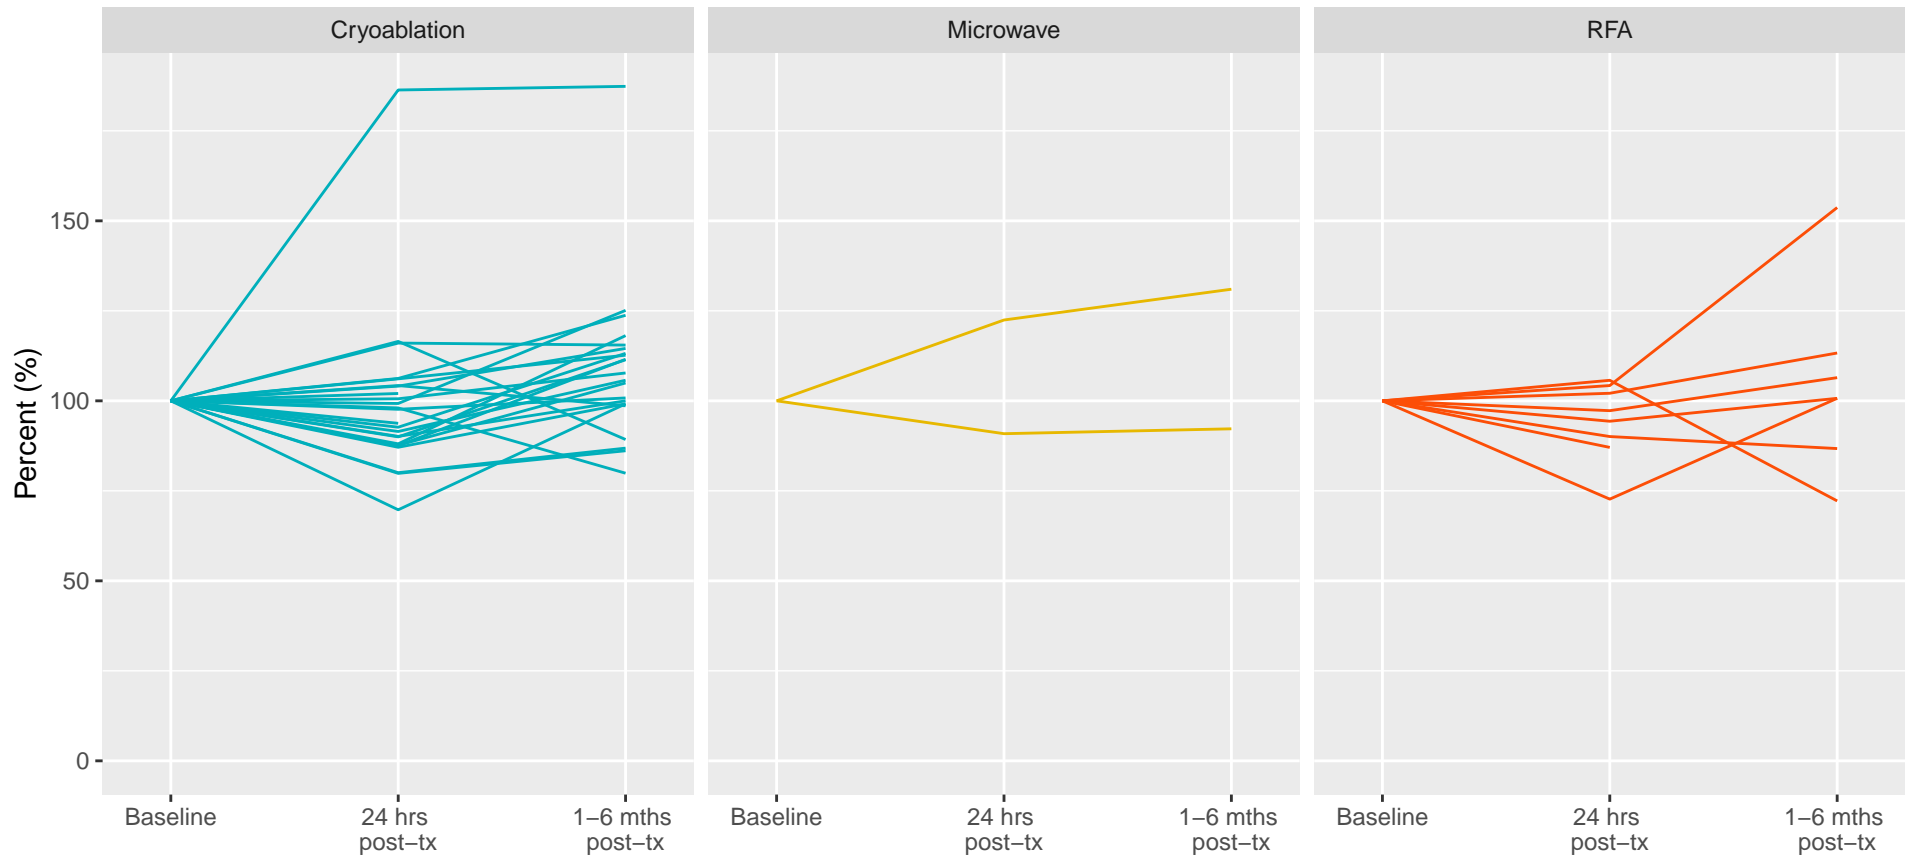

Uniprot ID: P43489, analyte: TNFRSF4

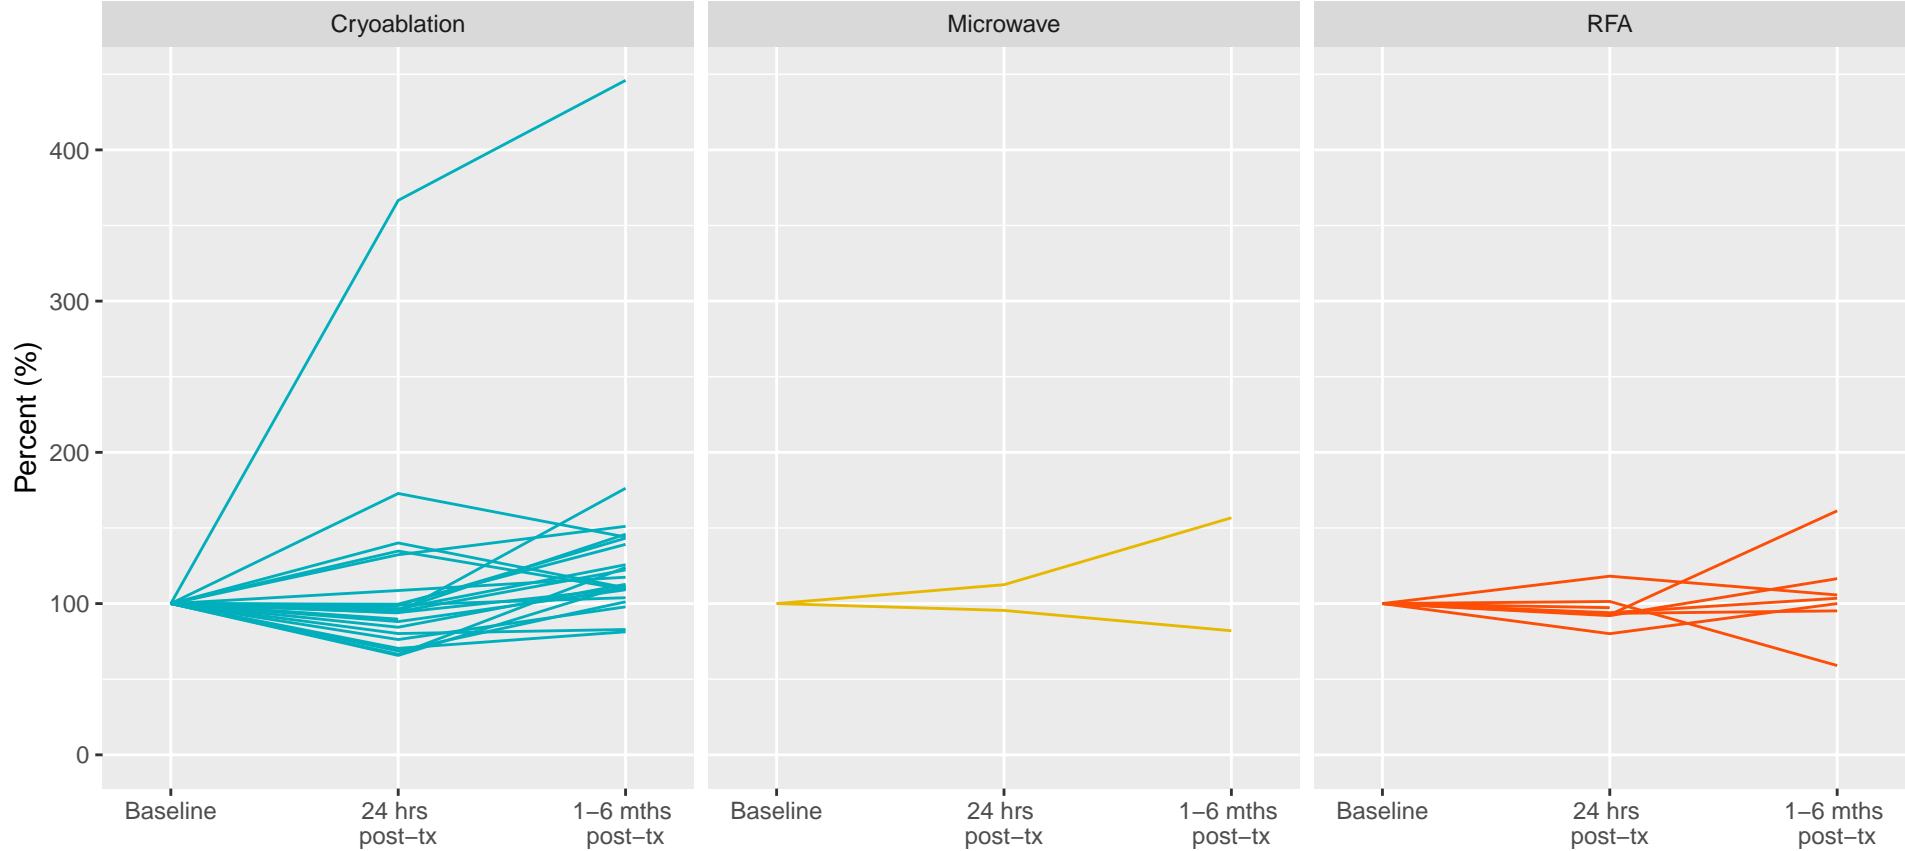

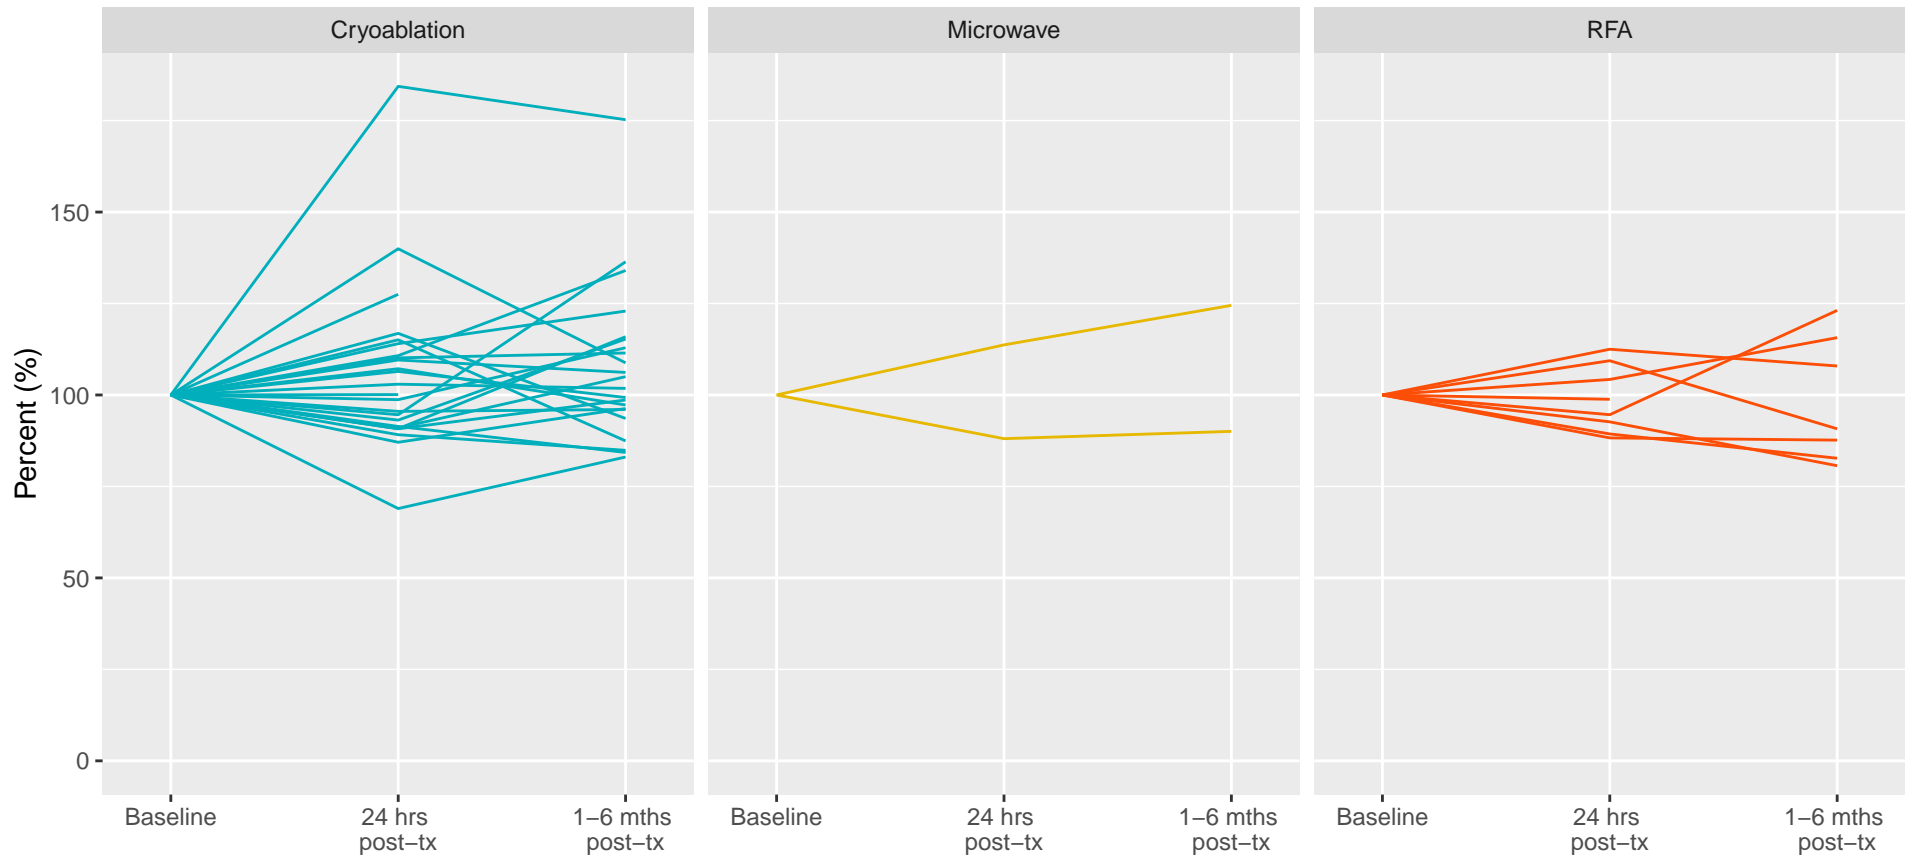

# Uniprot ID: Q92583, analyte: CCL17

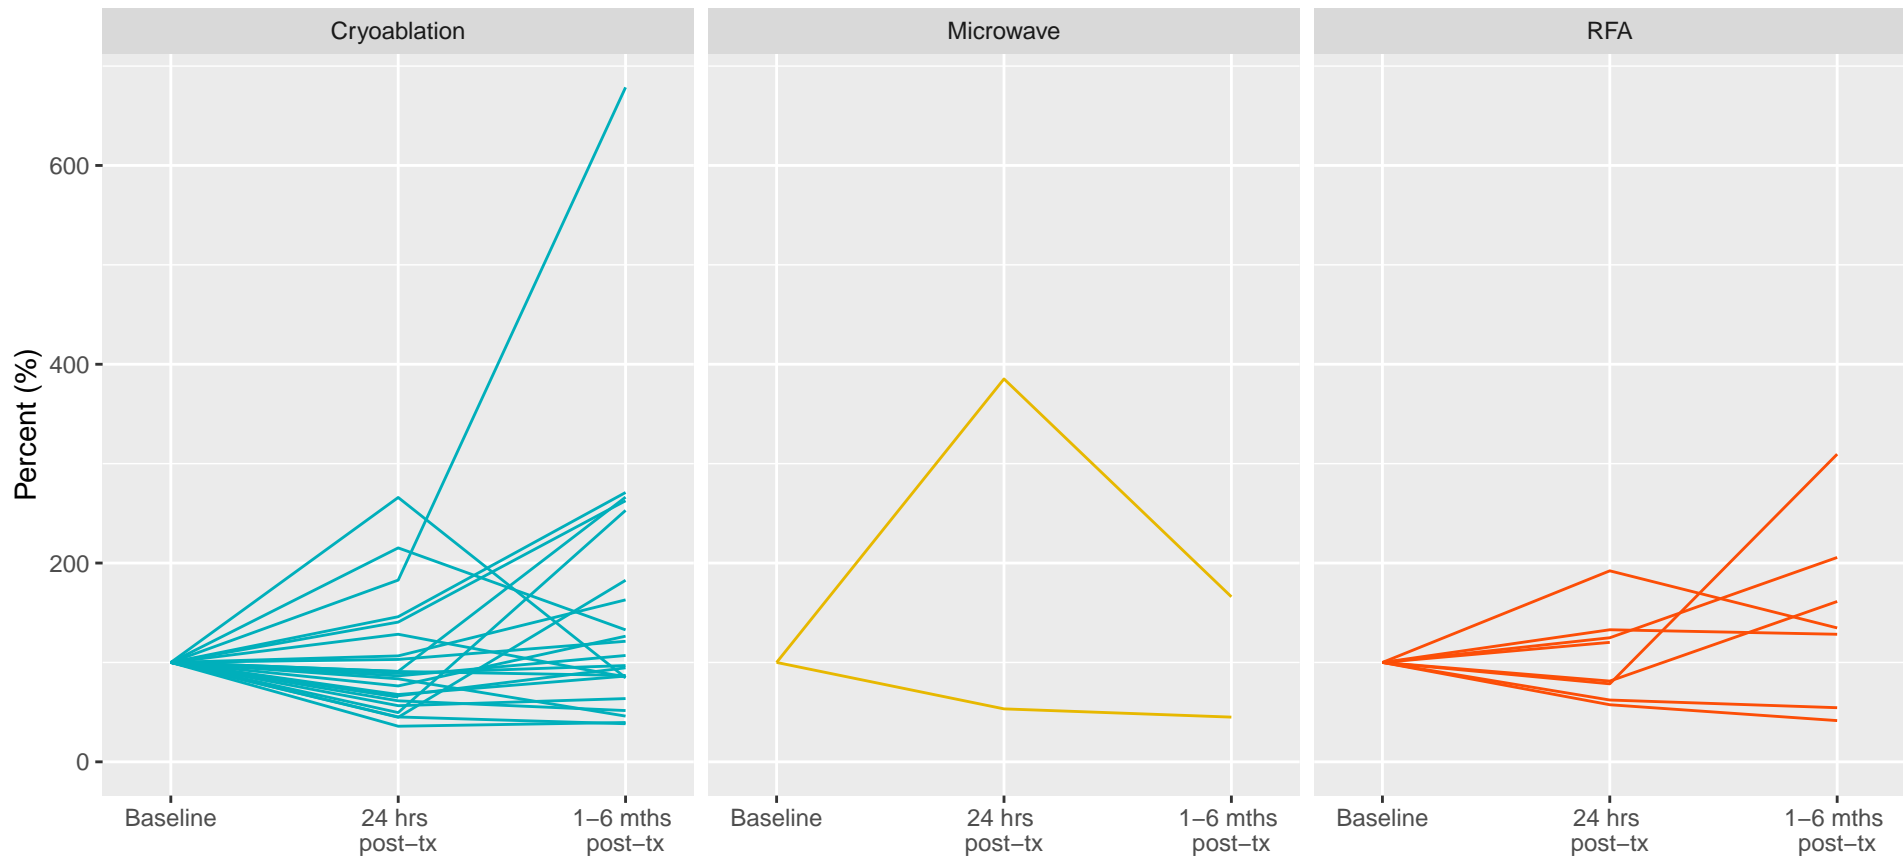

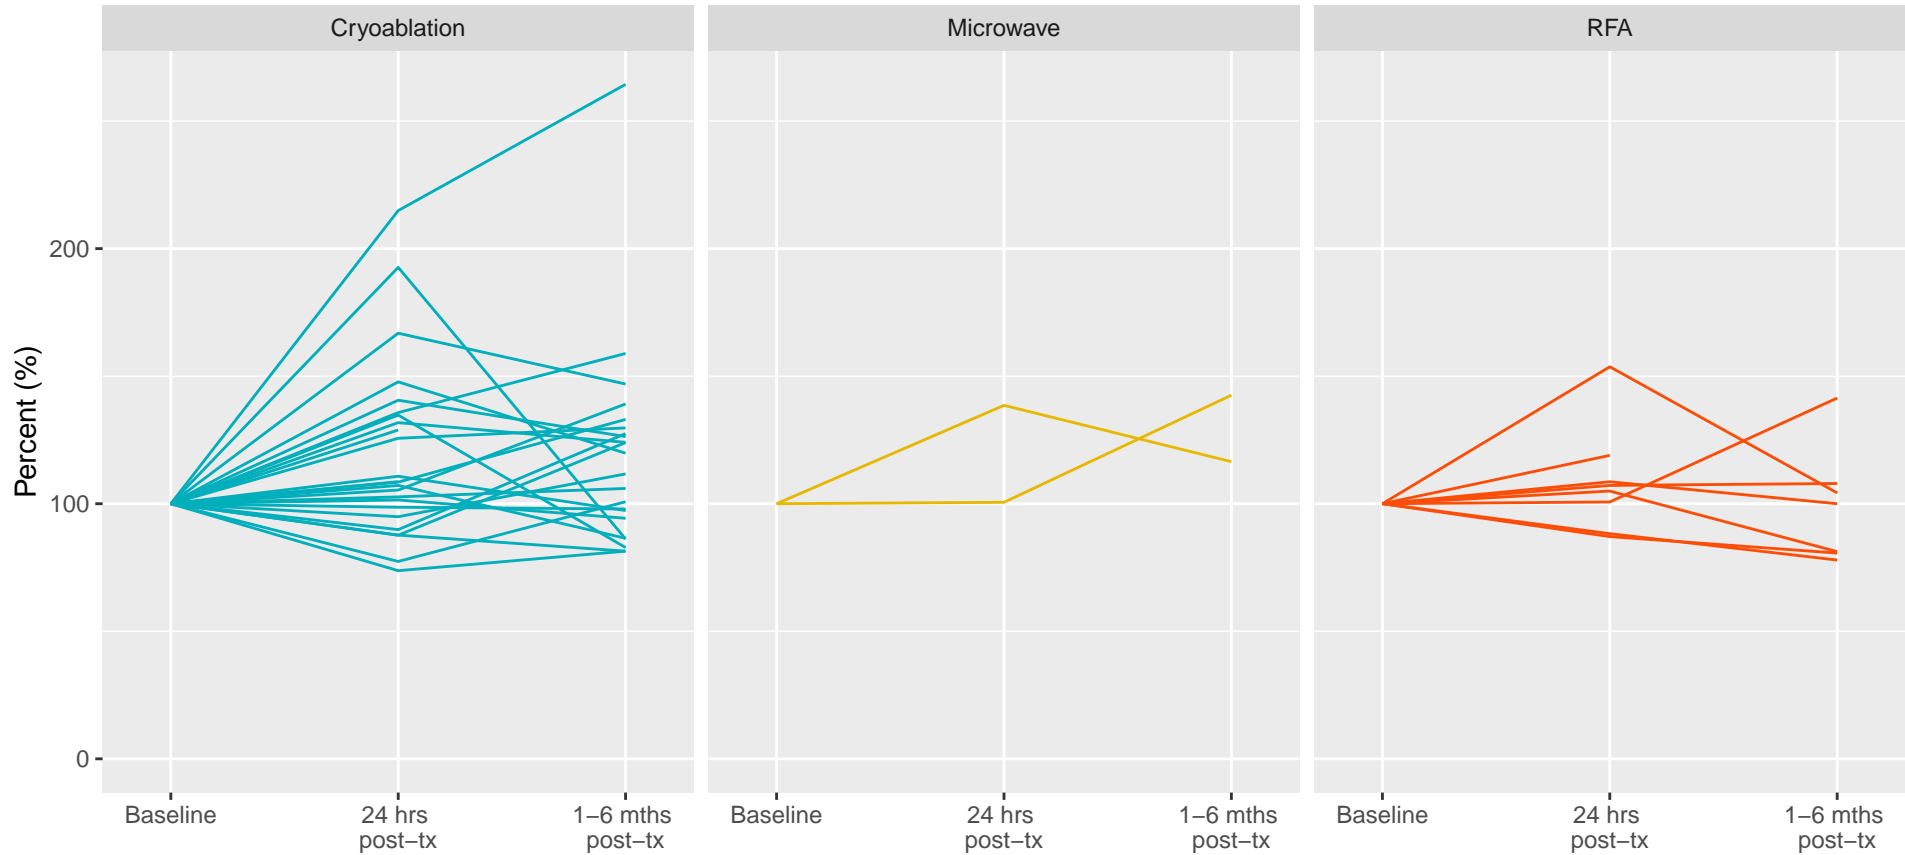

# Uniprot ID: P21246, analyte: PTN

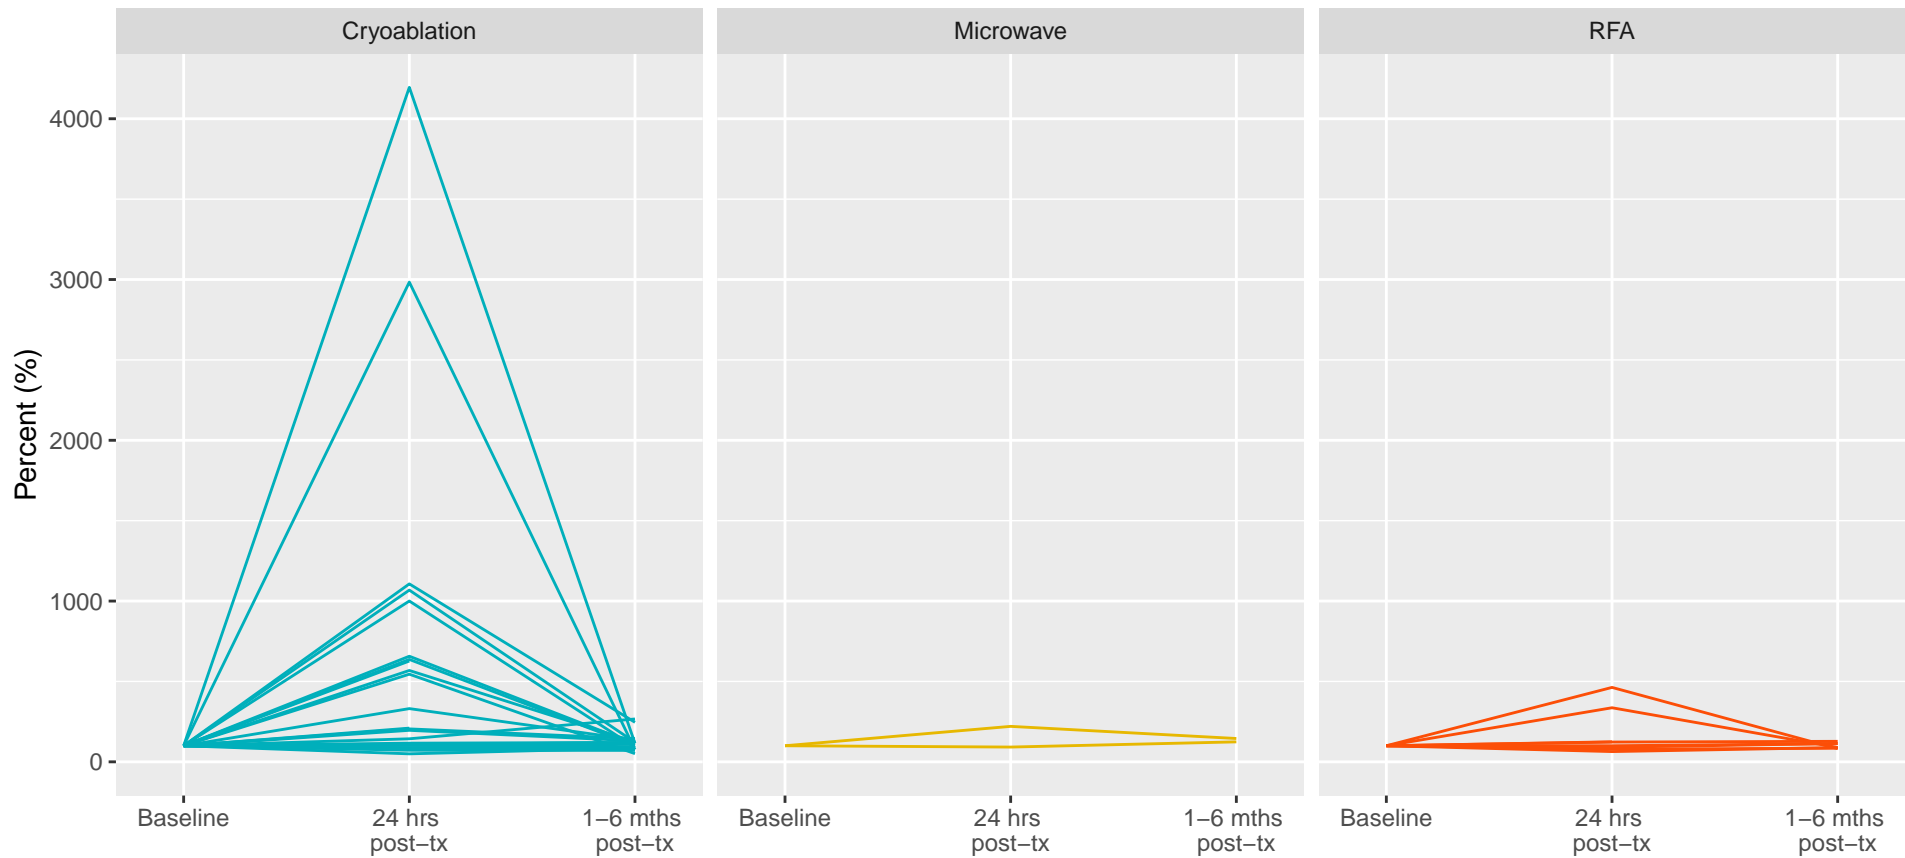

# Uniprot ID: P48061, analyte: CXCL12

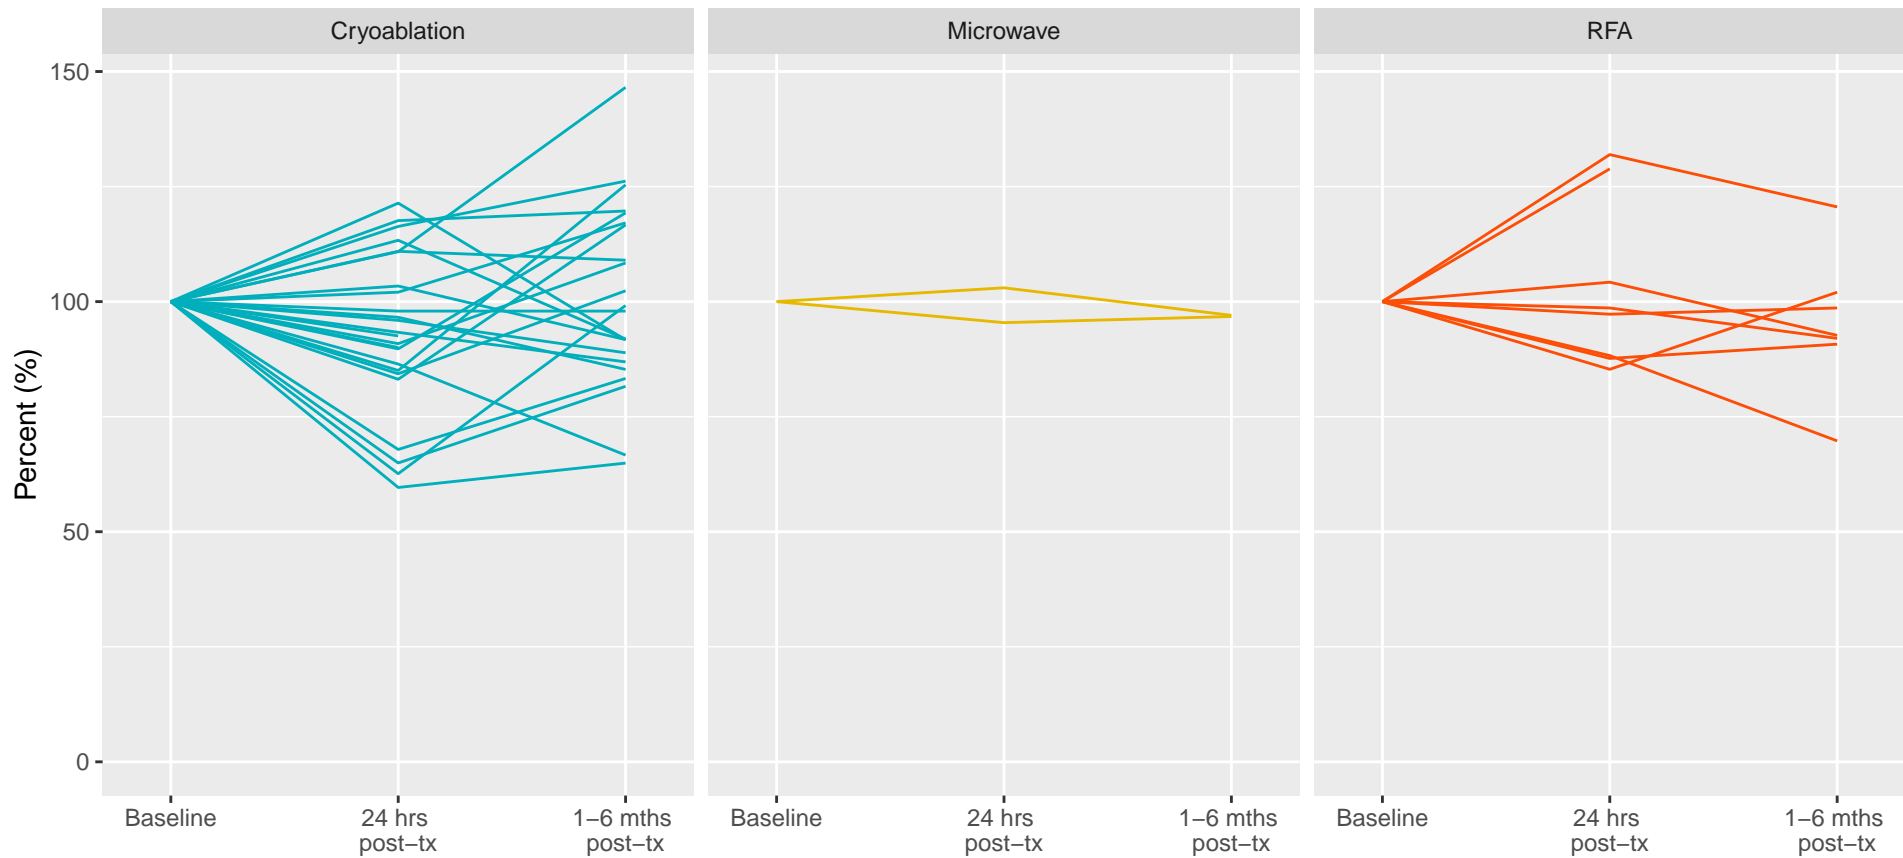

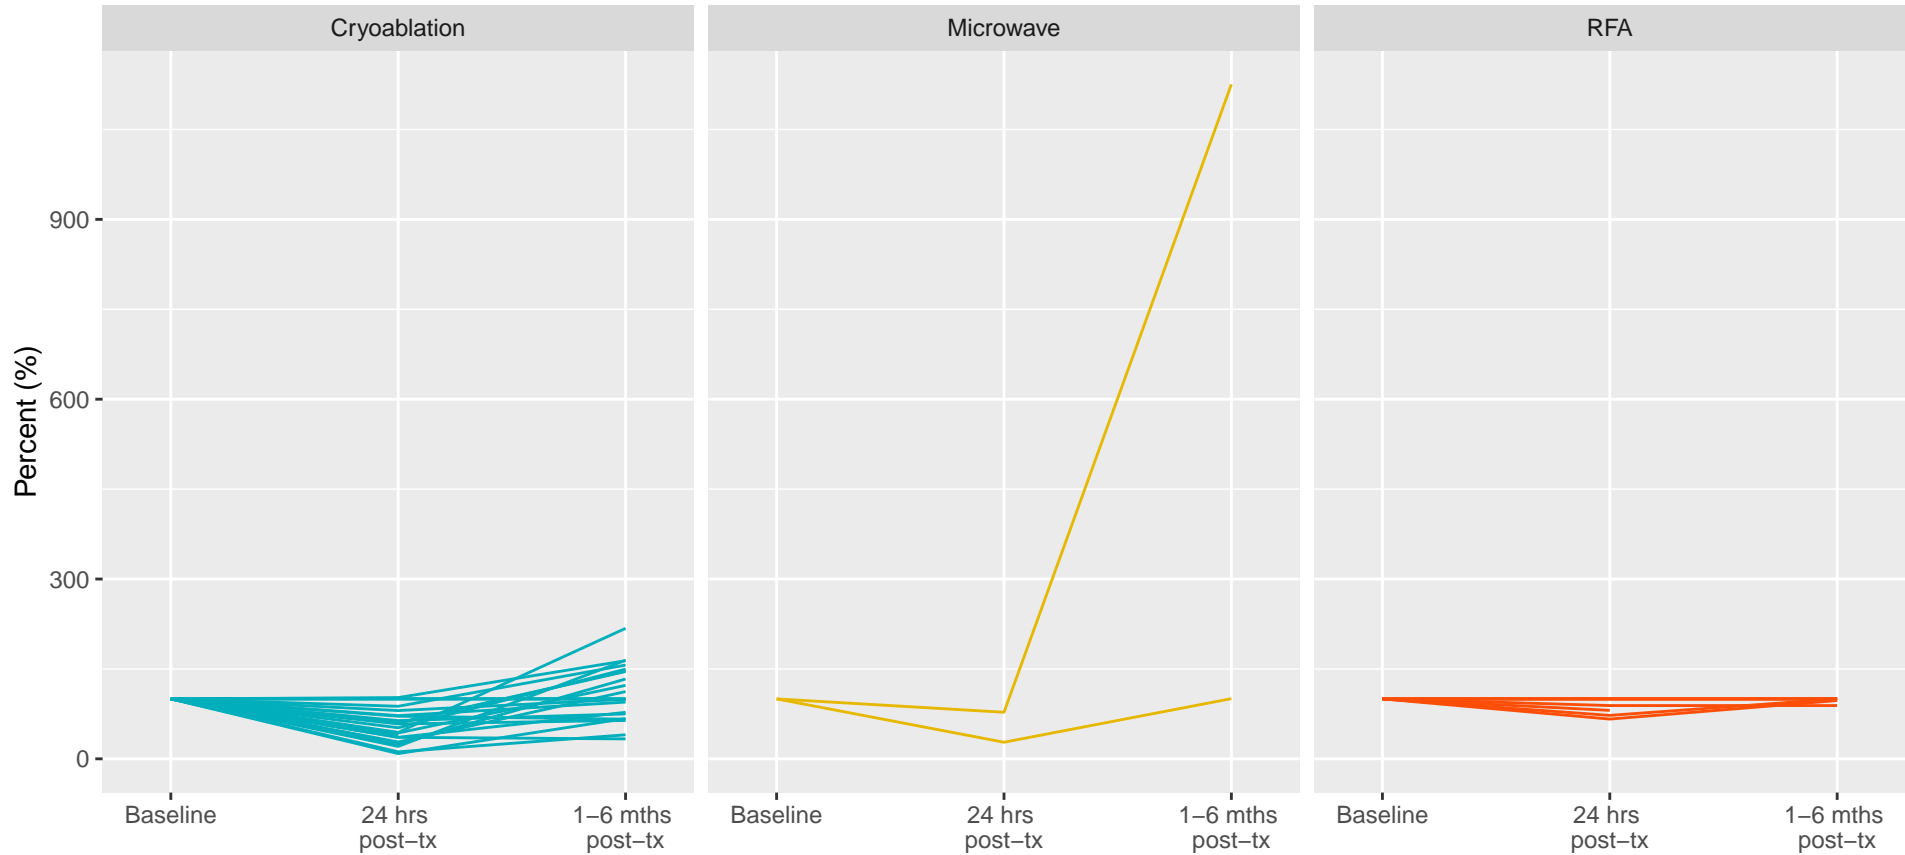



Uniprot ID: Q9UQV4, analyte: LAMP3

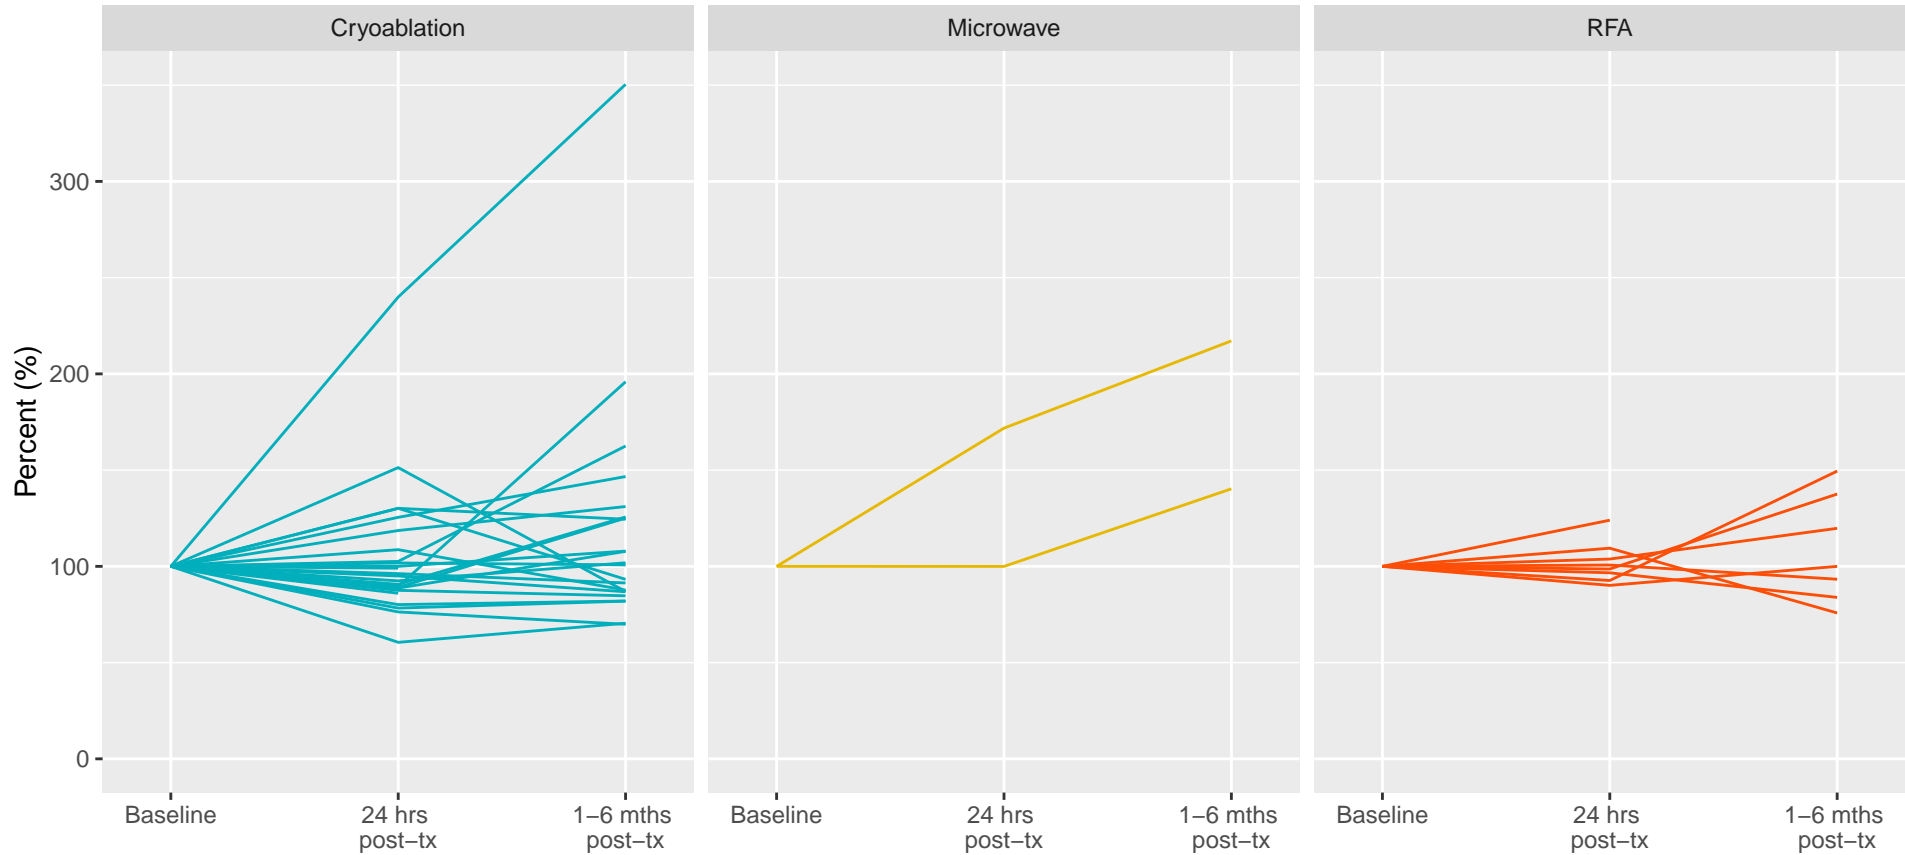

# Uniprot ID: Q14790, analyte: CASP-8

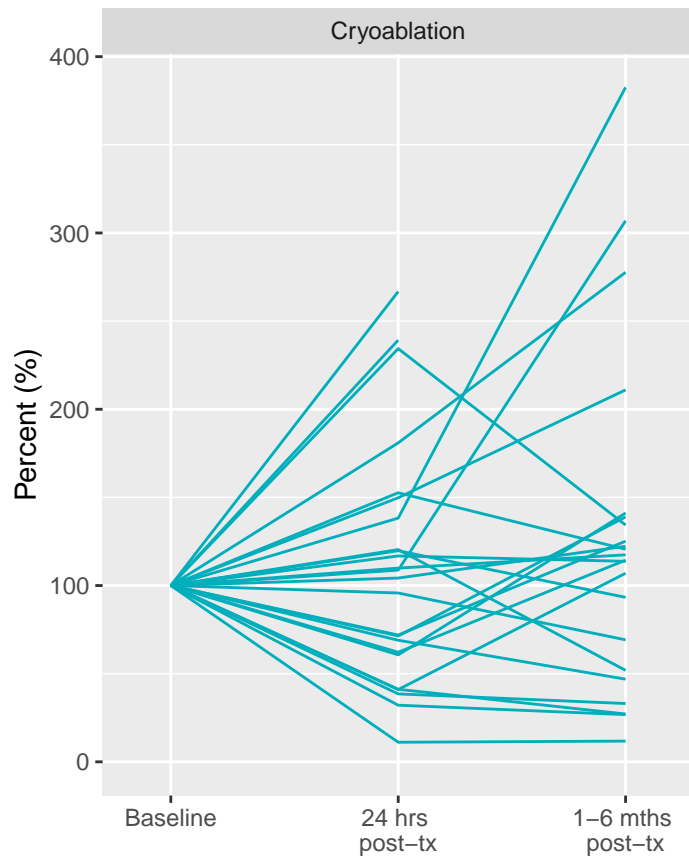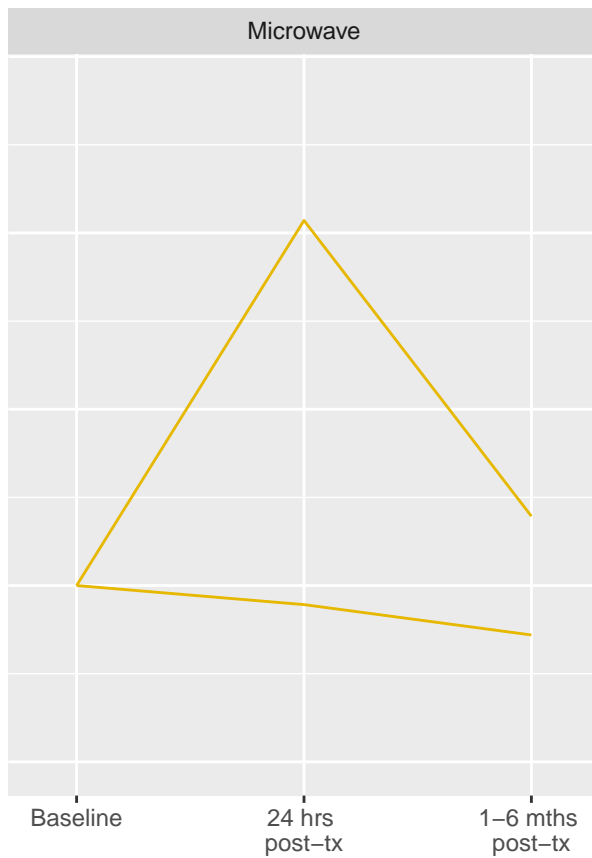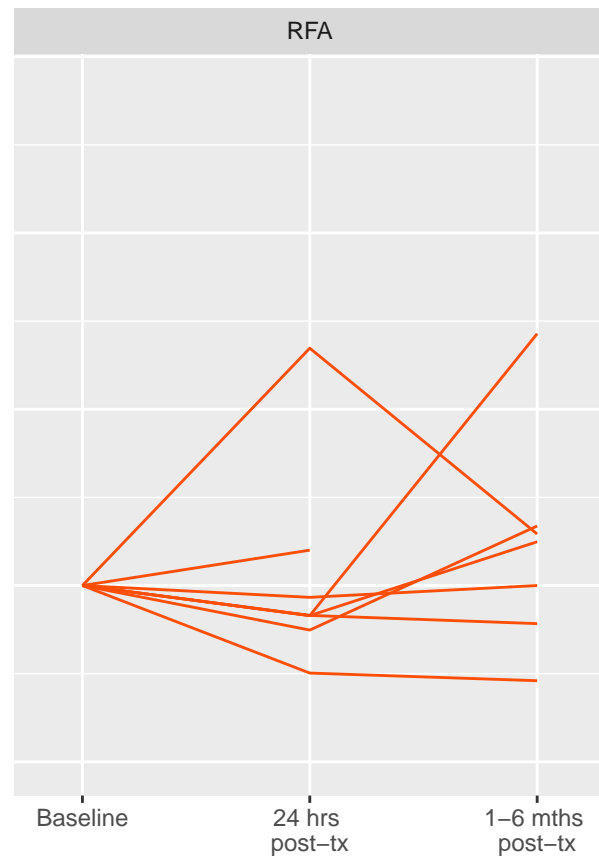

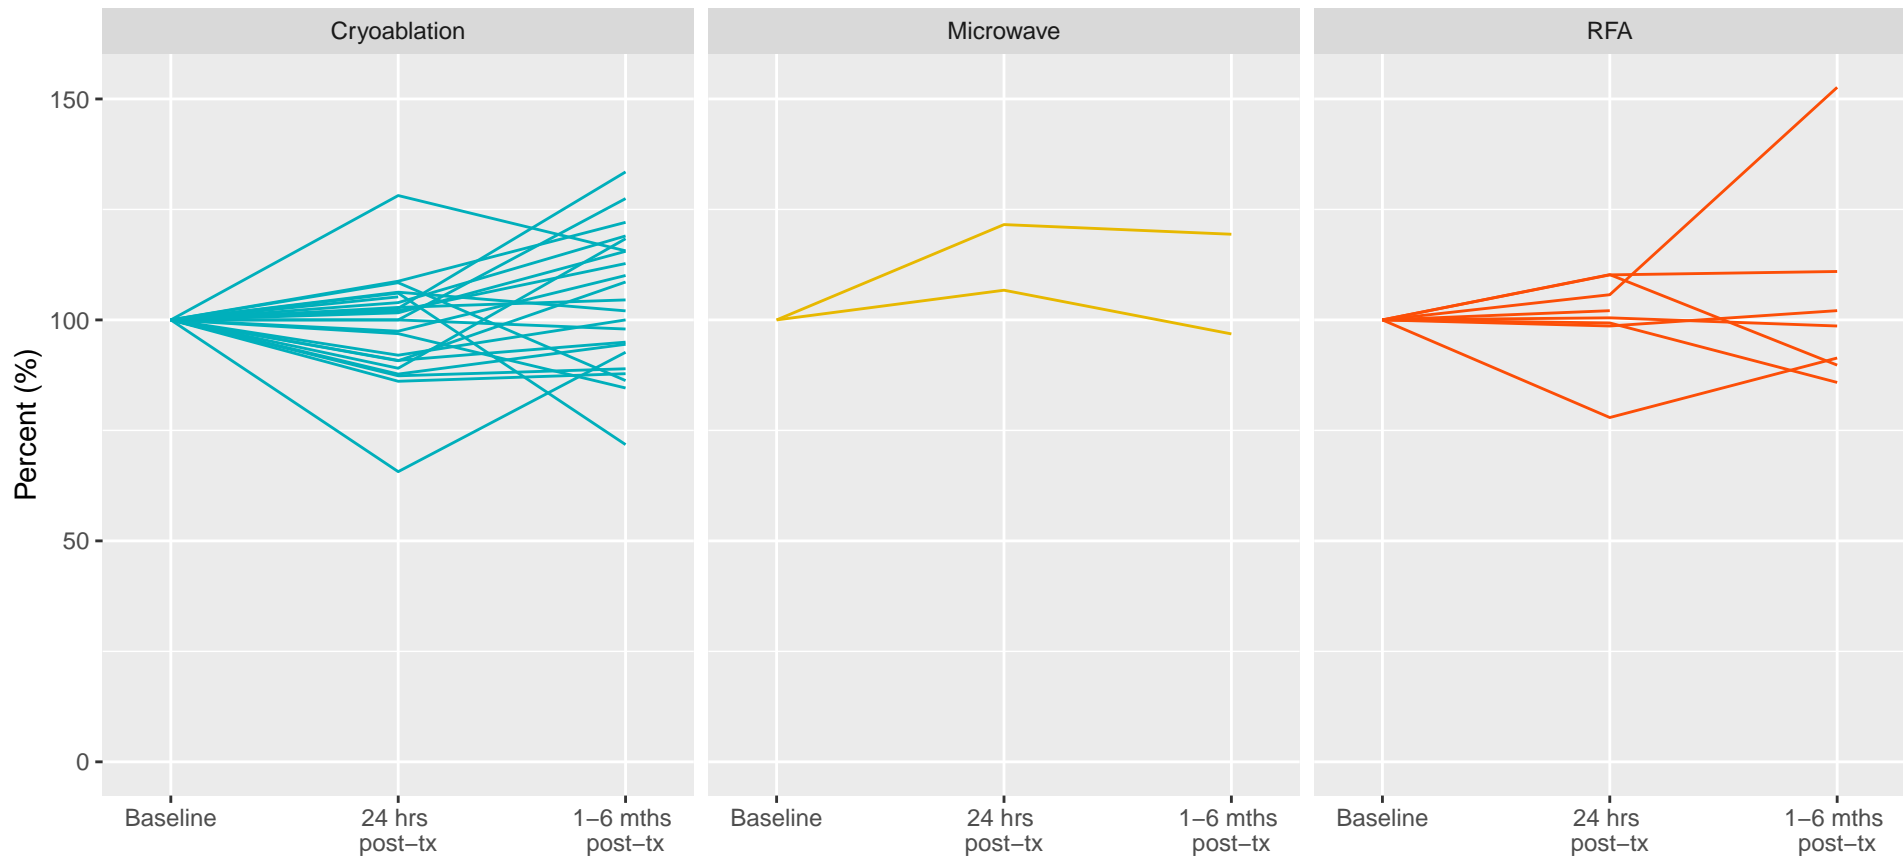

# Uniprot ID: P39900, analyte: MMP12

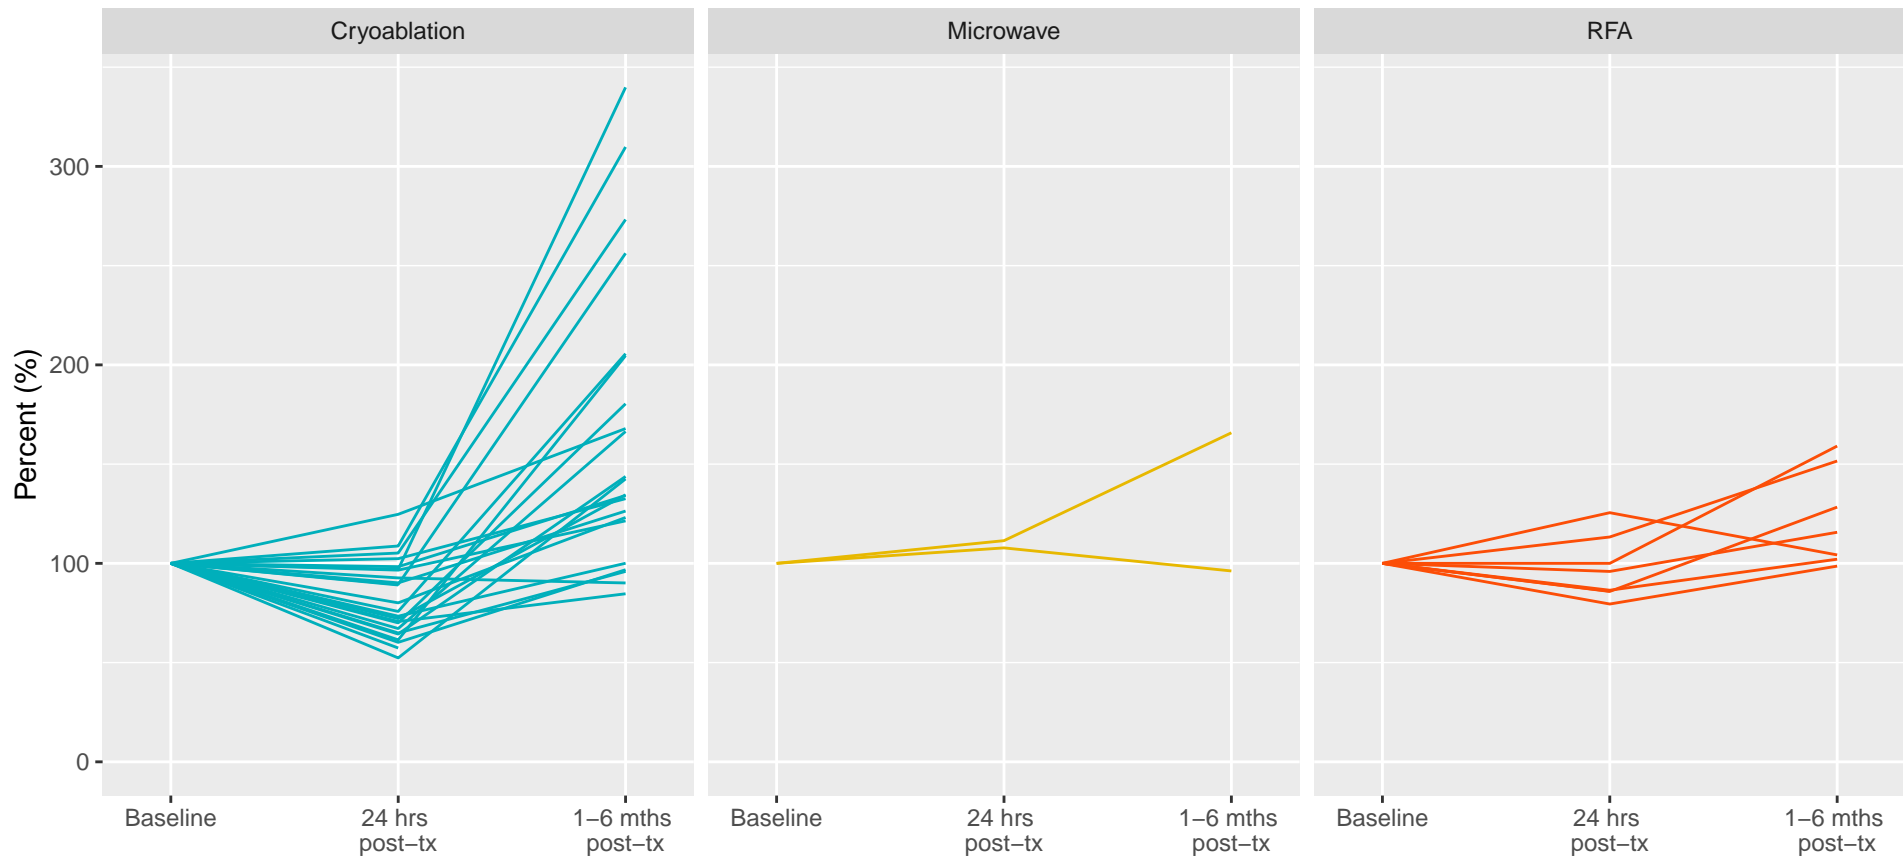

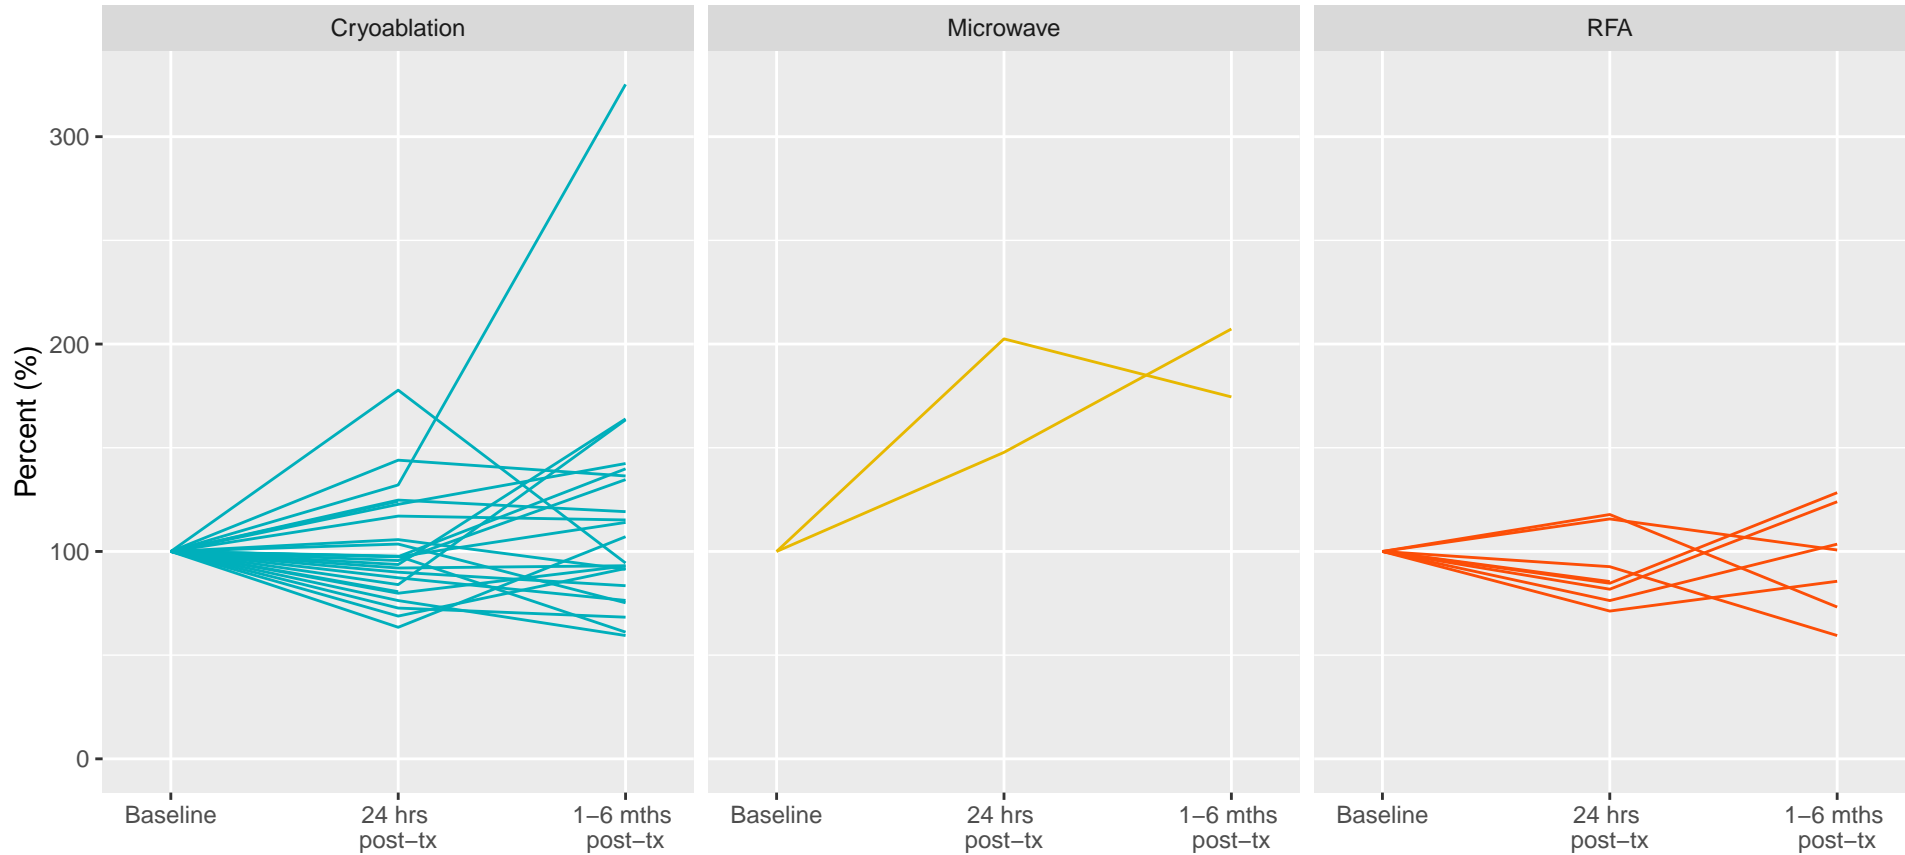

Uniprot ID: Q9BQ51, analyte: PD-L2

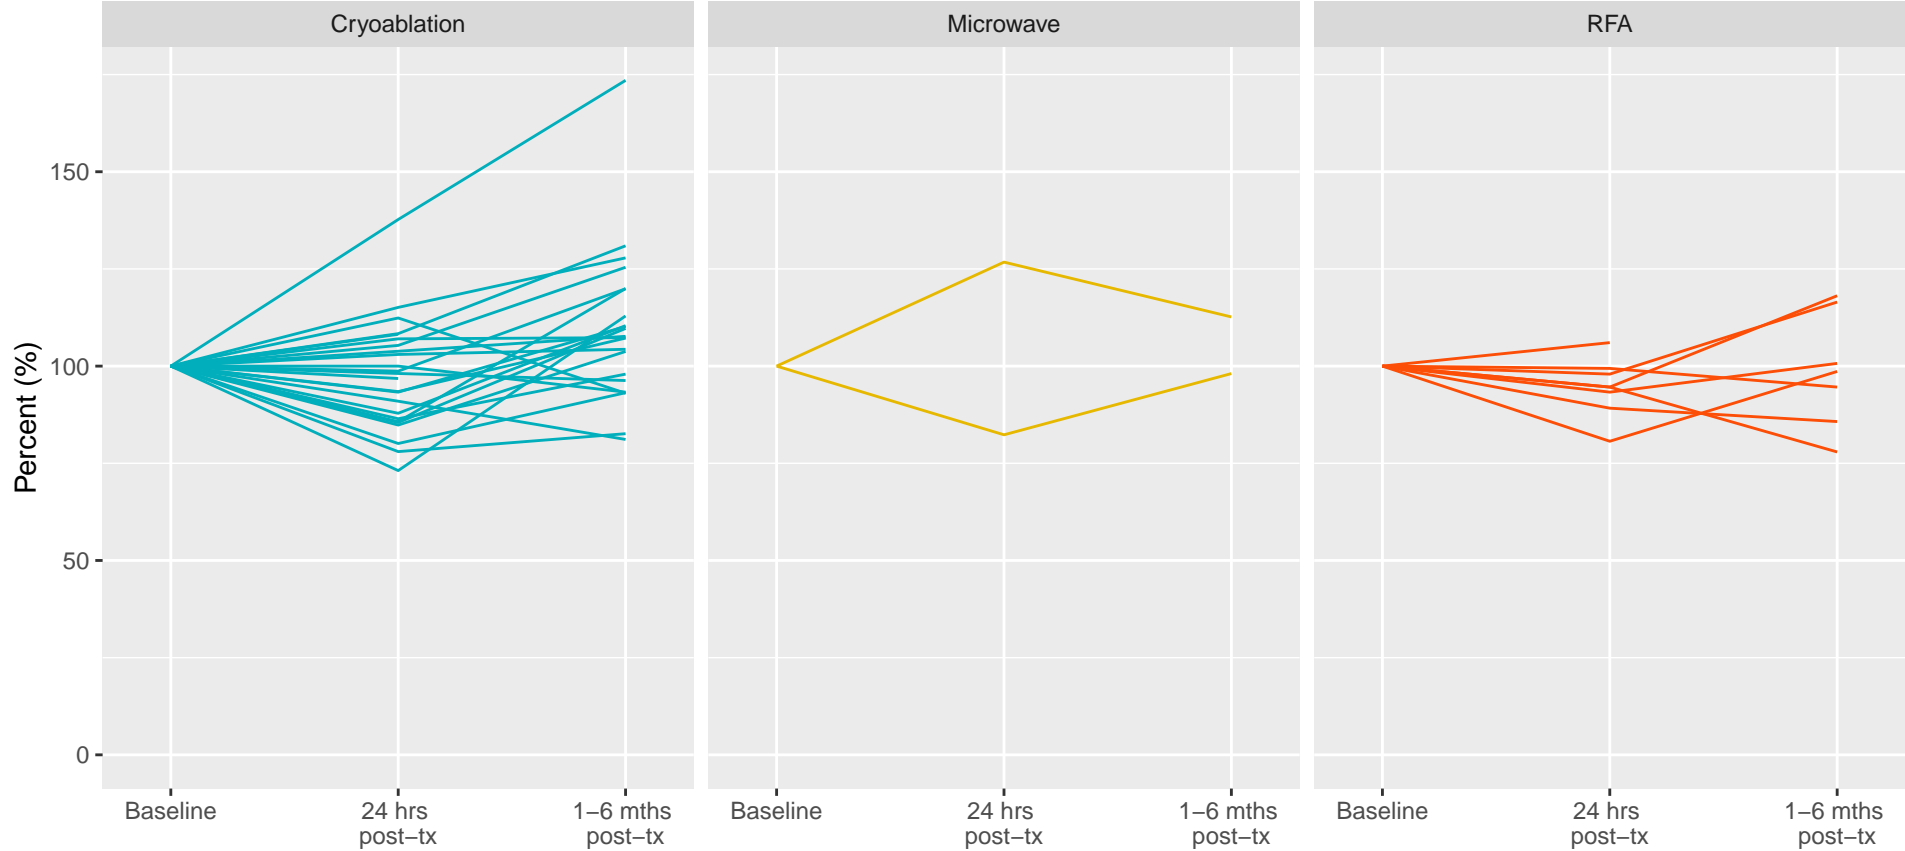

Uniprot ID: P15692, analyte: VEGFA

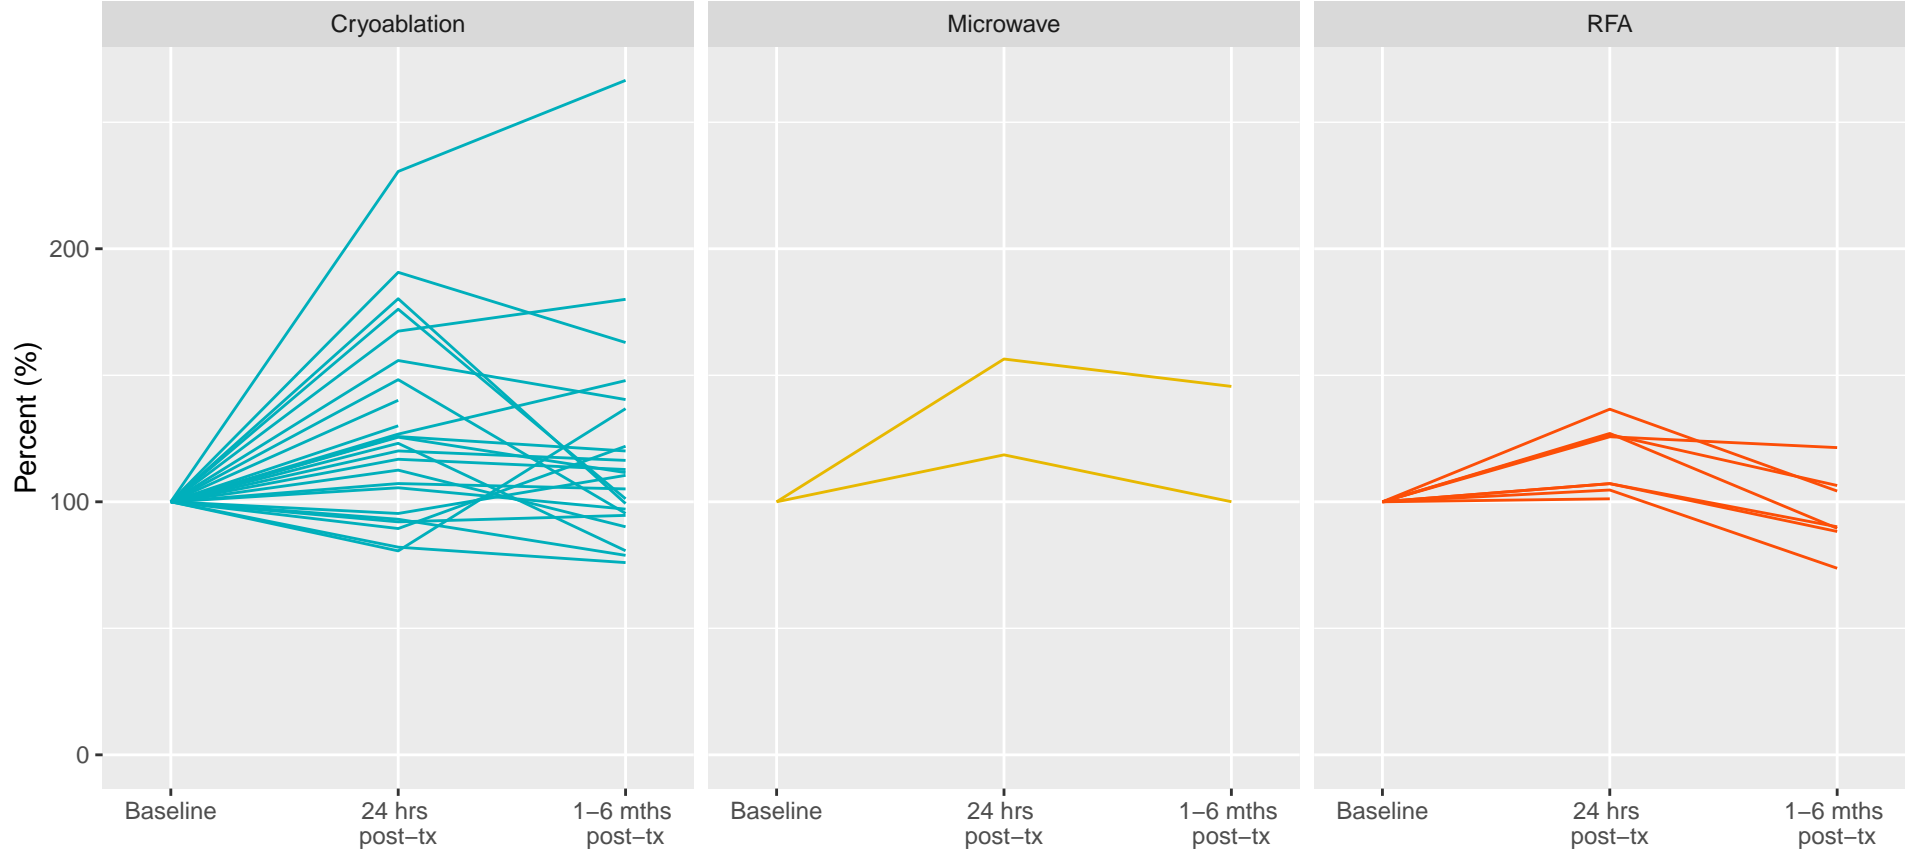

Uniprot ID: P18627, analyte: LAG3

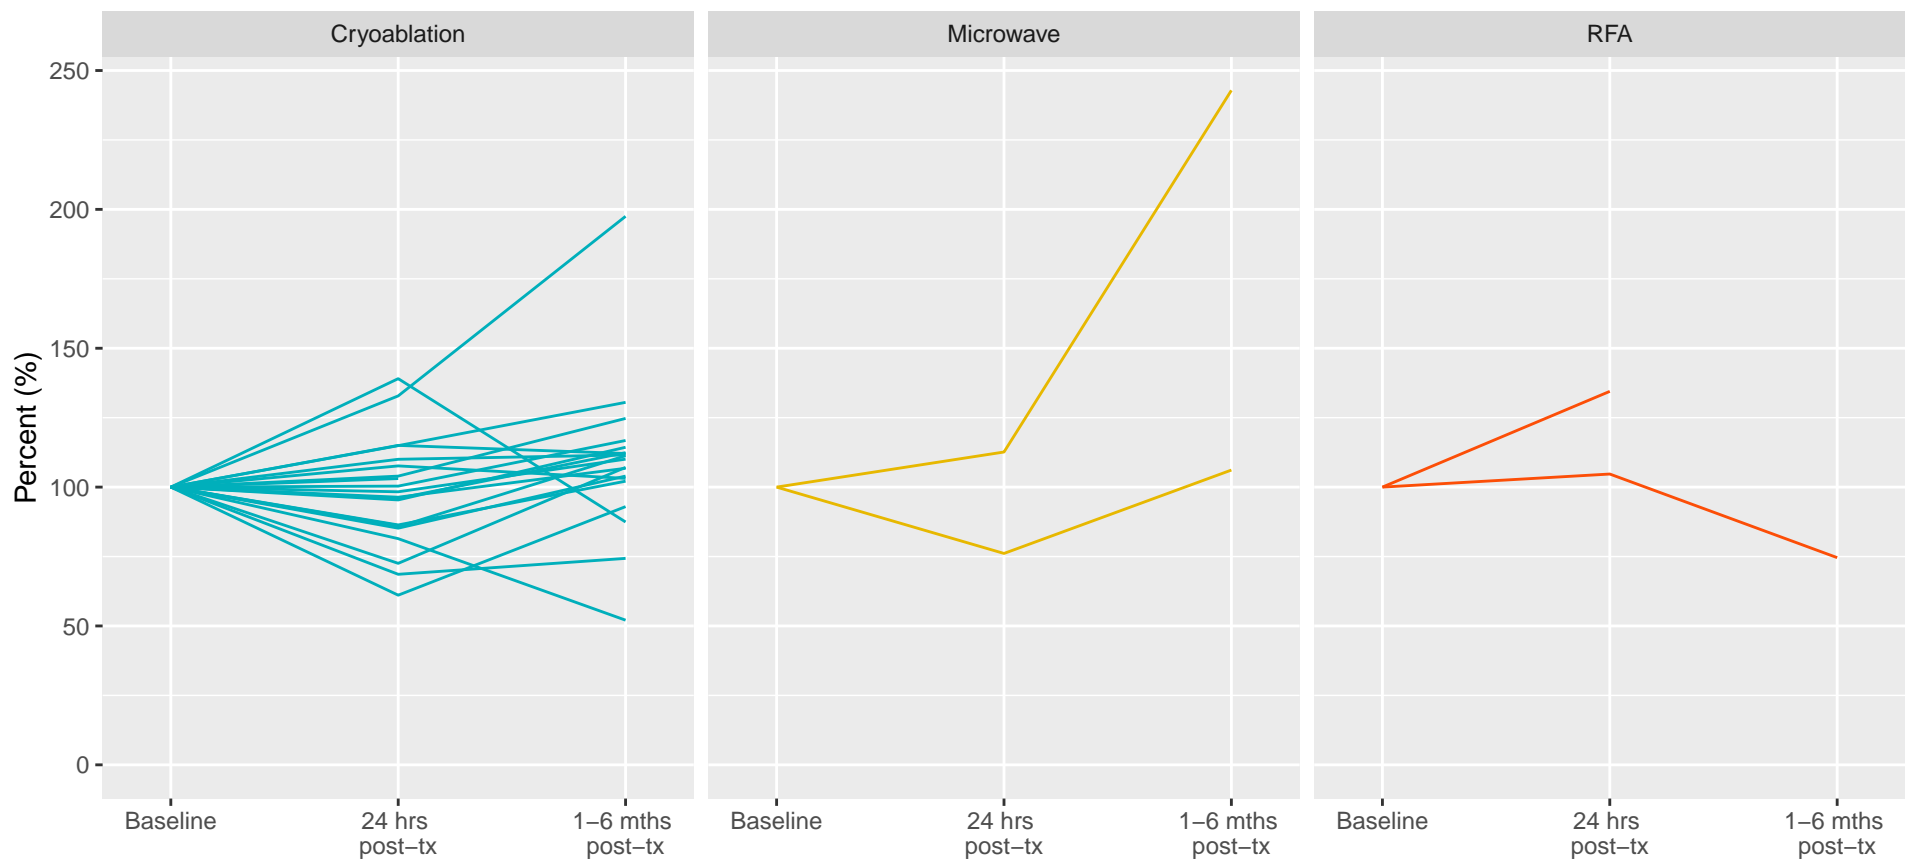



# Uniprot ID: P42701, analyte: IL12RB1

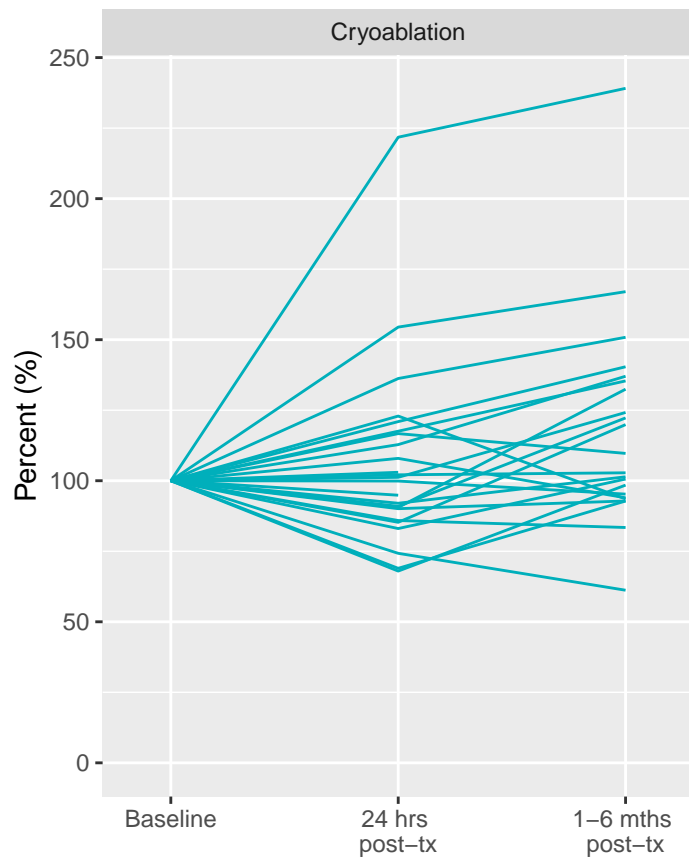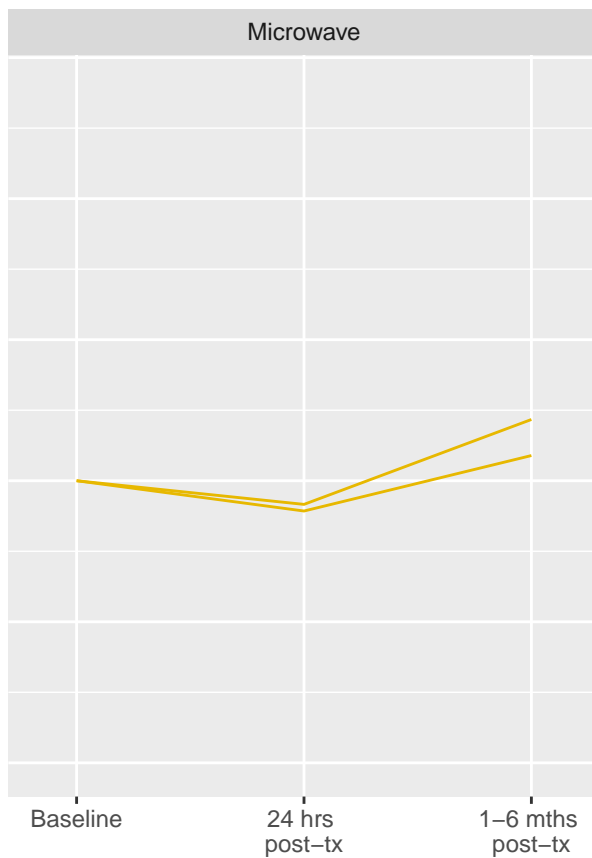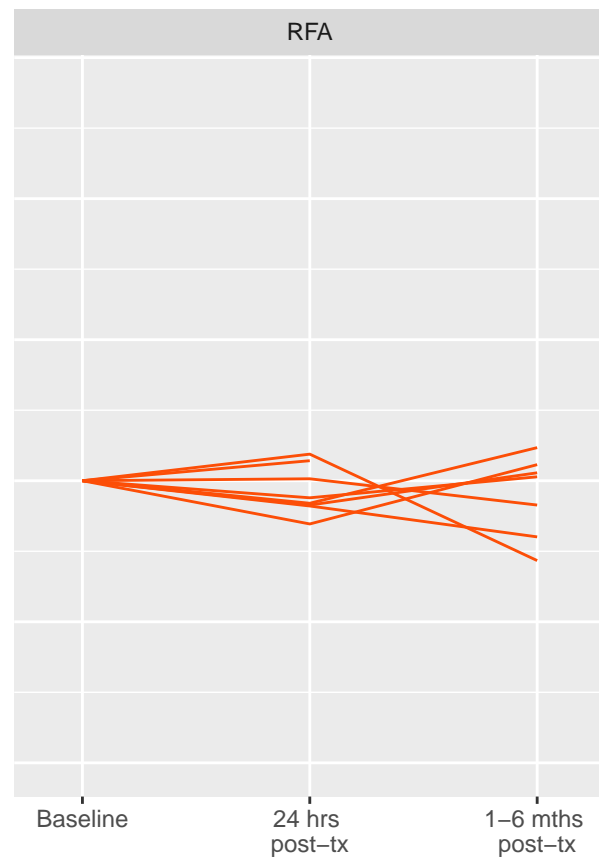

Uniprot ID: P78556, analyte: CCL20

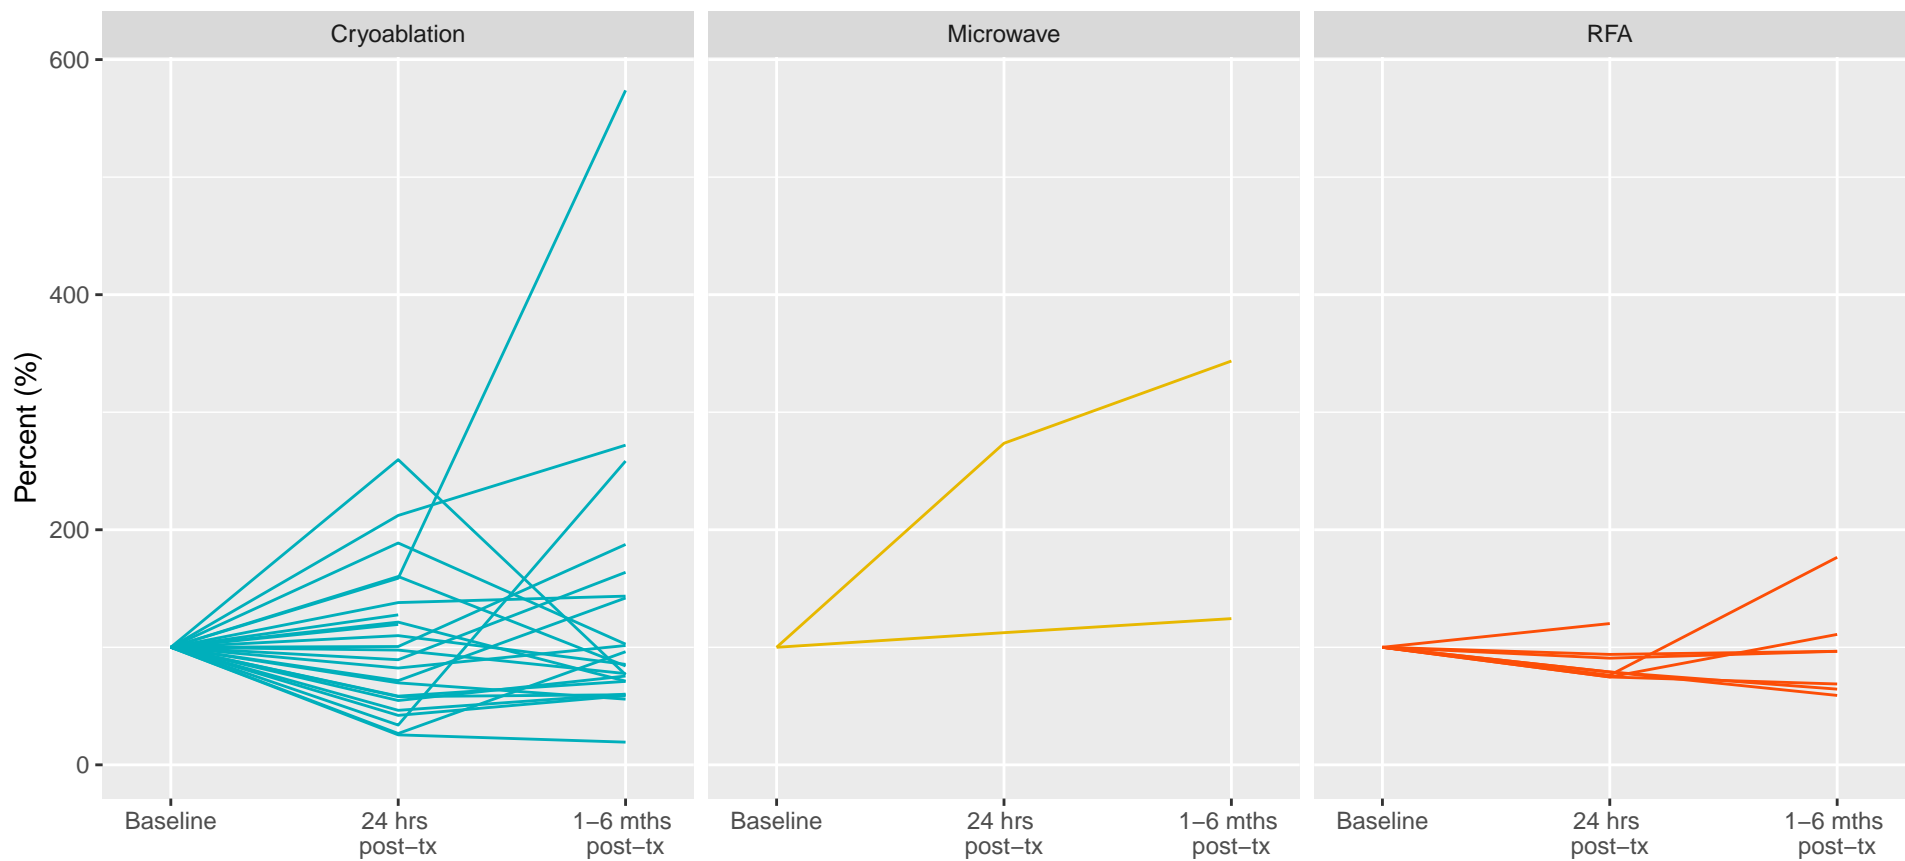

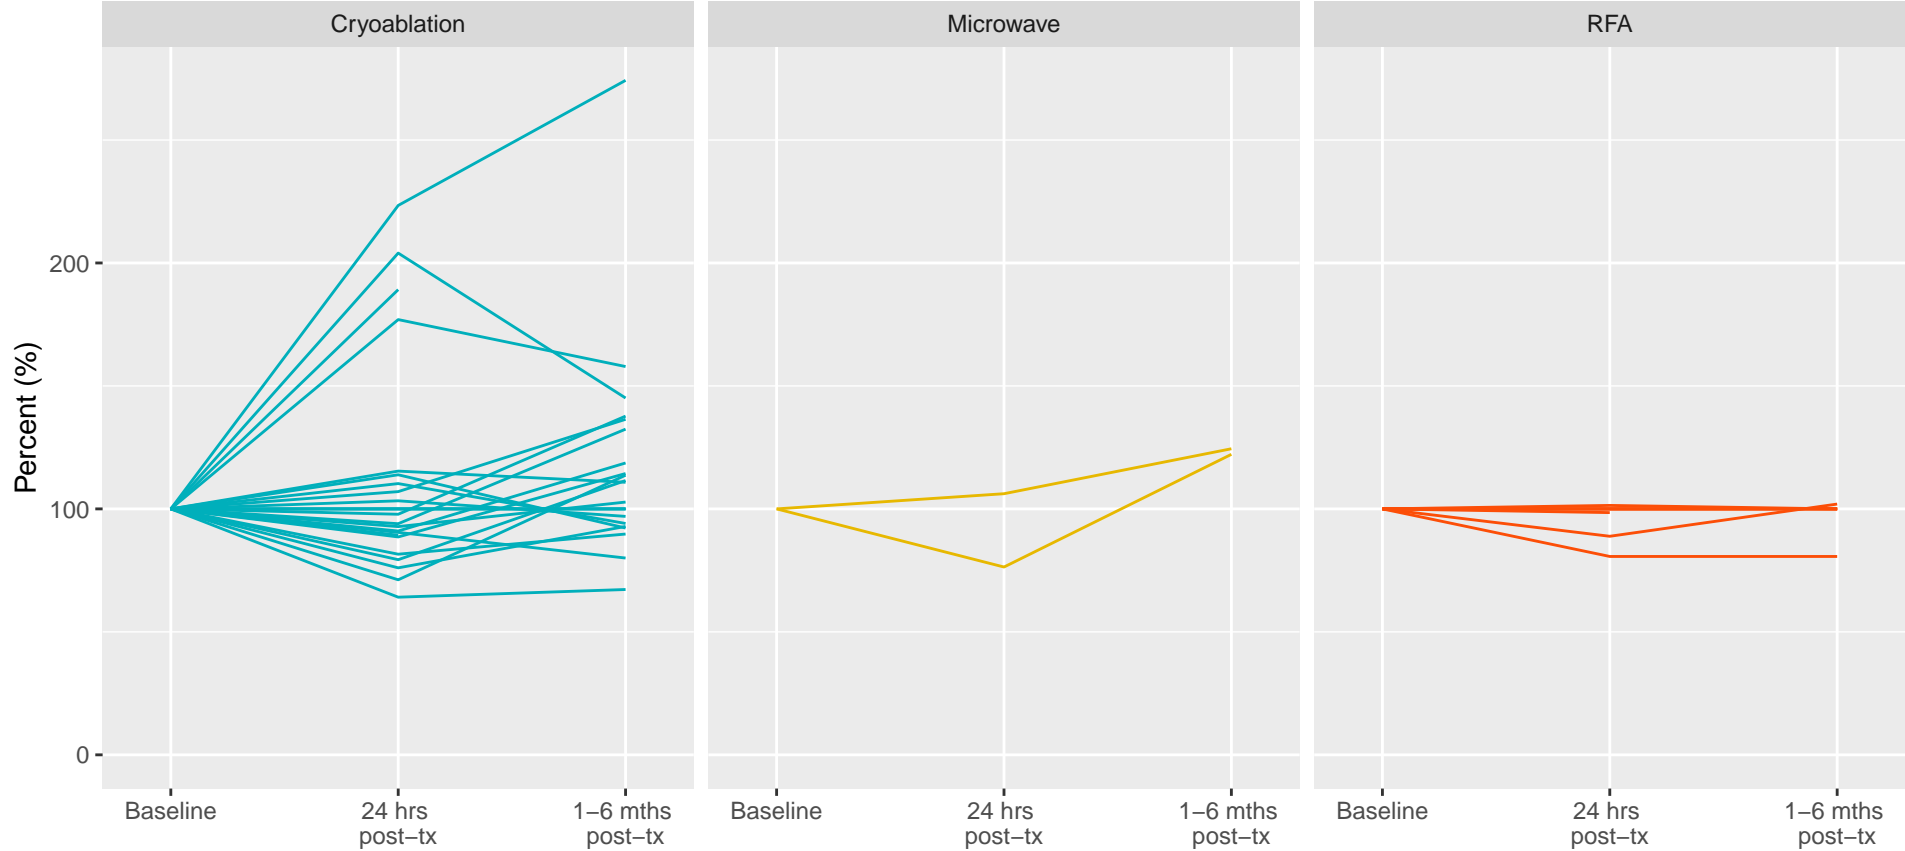

Uniprot ID: Q13241, analyte: KLRD1

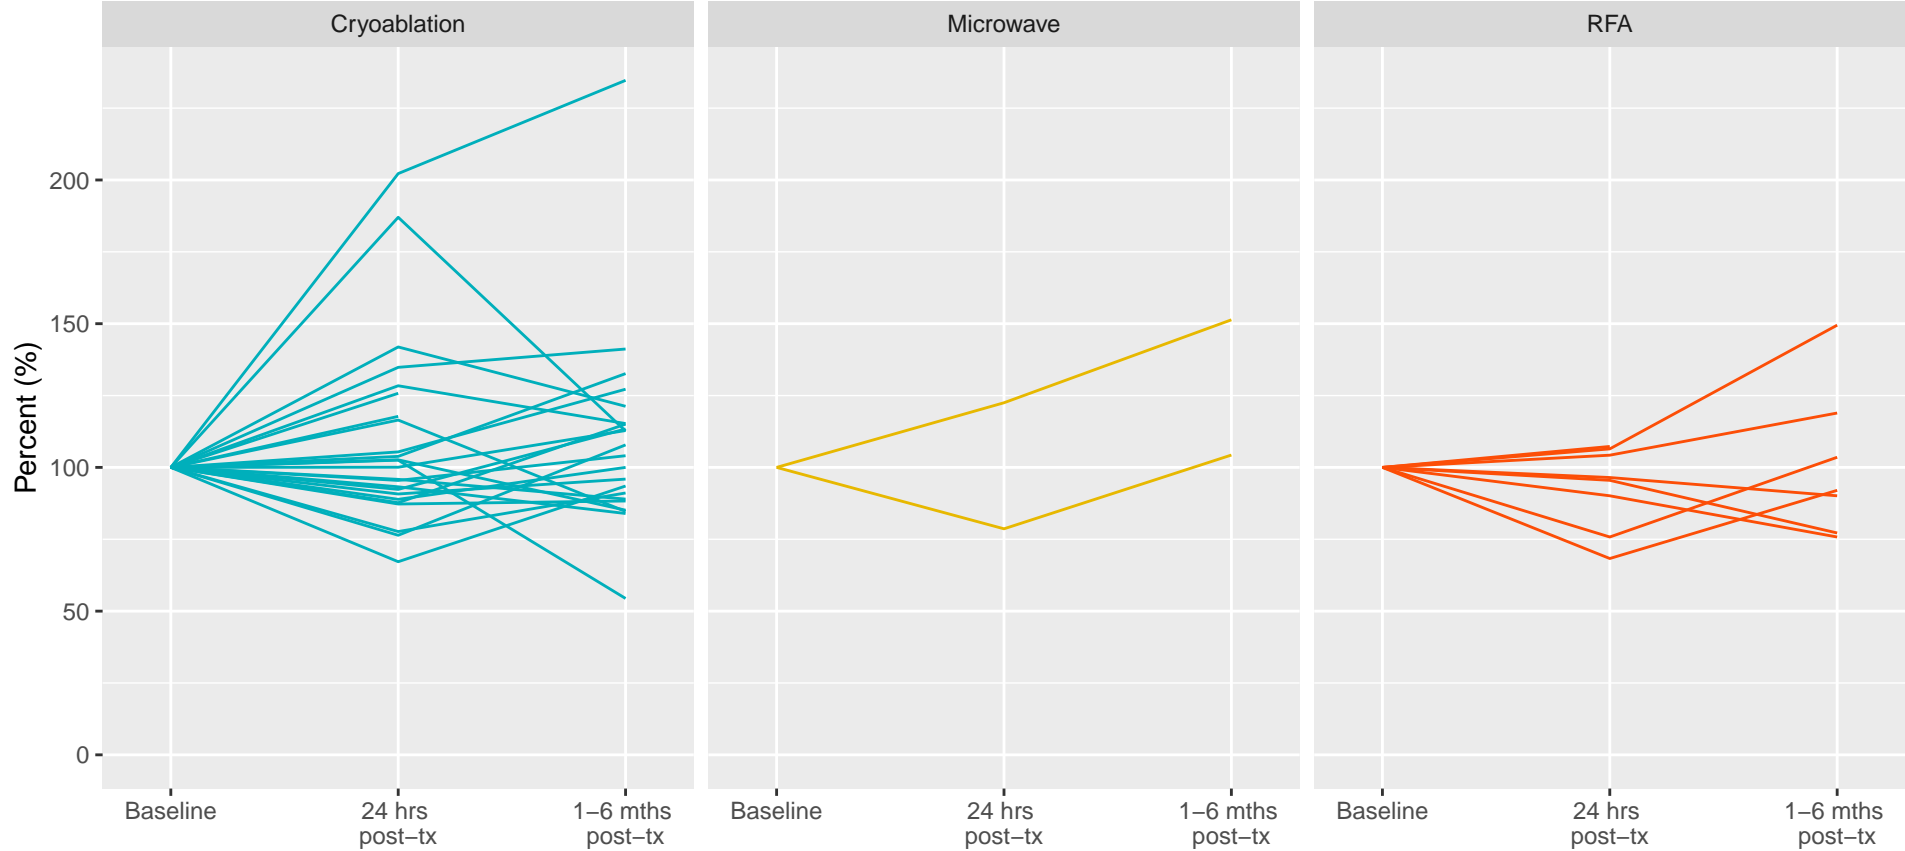

Uniprot ID: P10144, analyte: GZMB

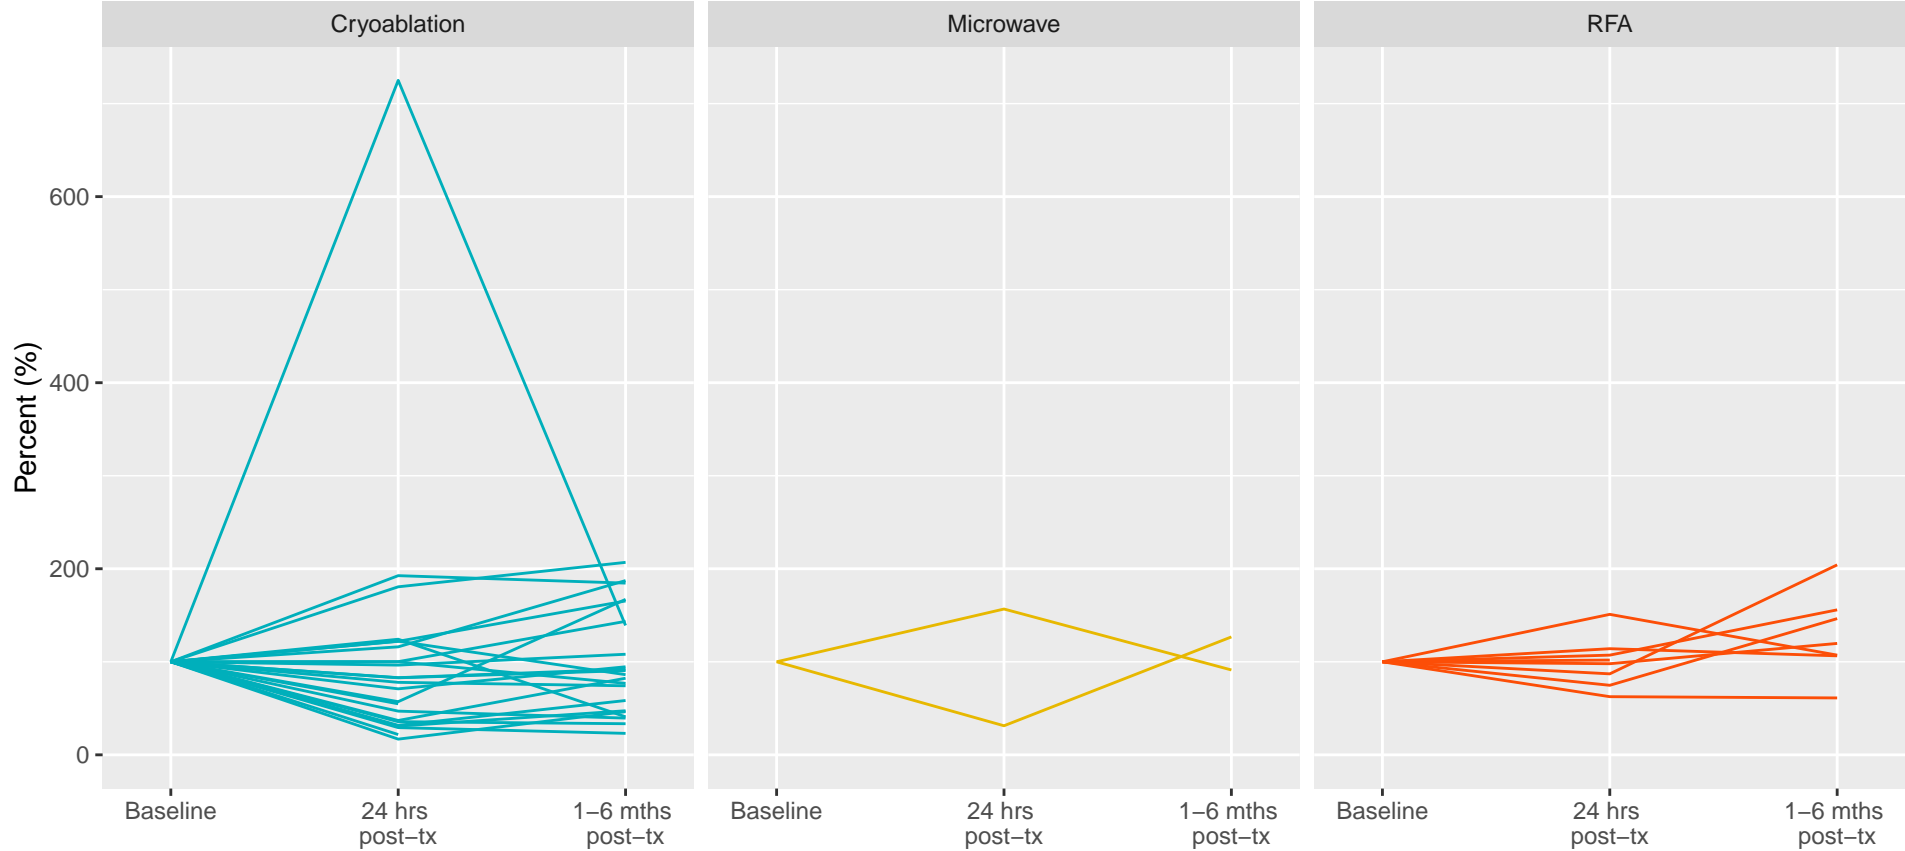

Uniprot ID: Q01151, analyte: CD83

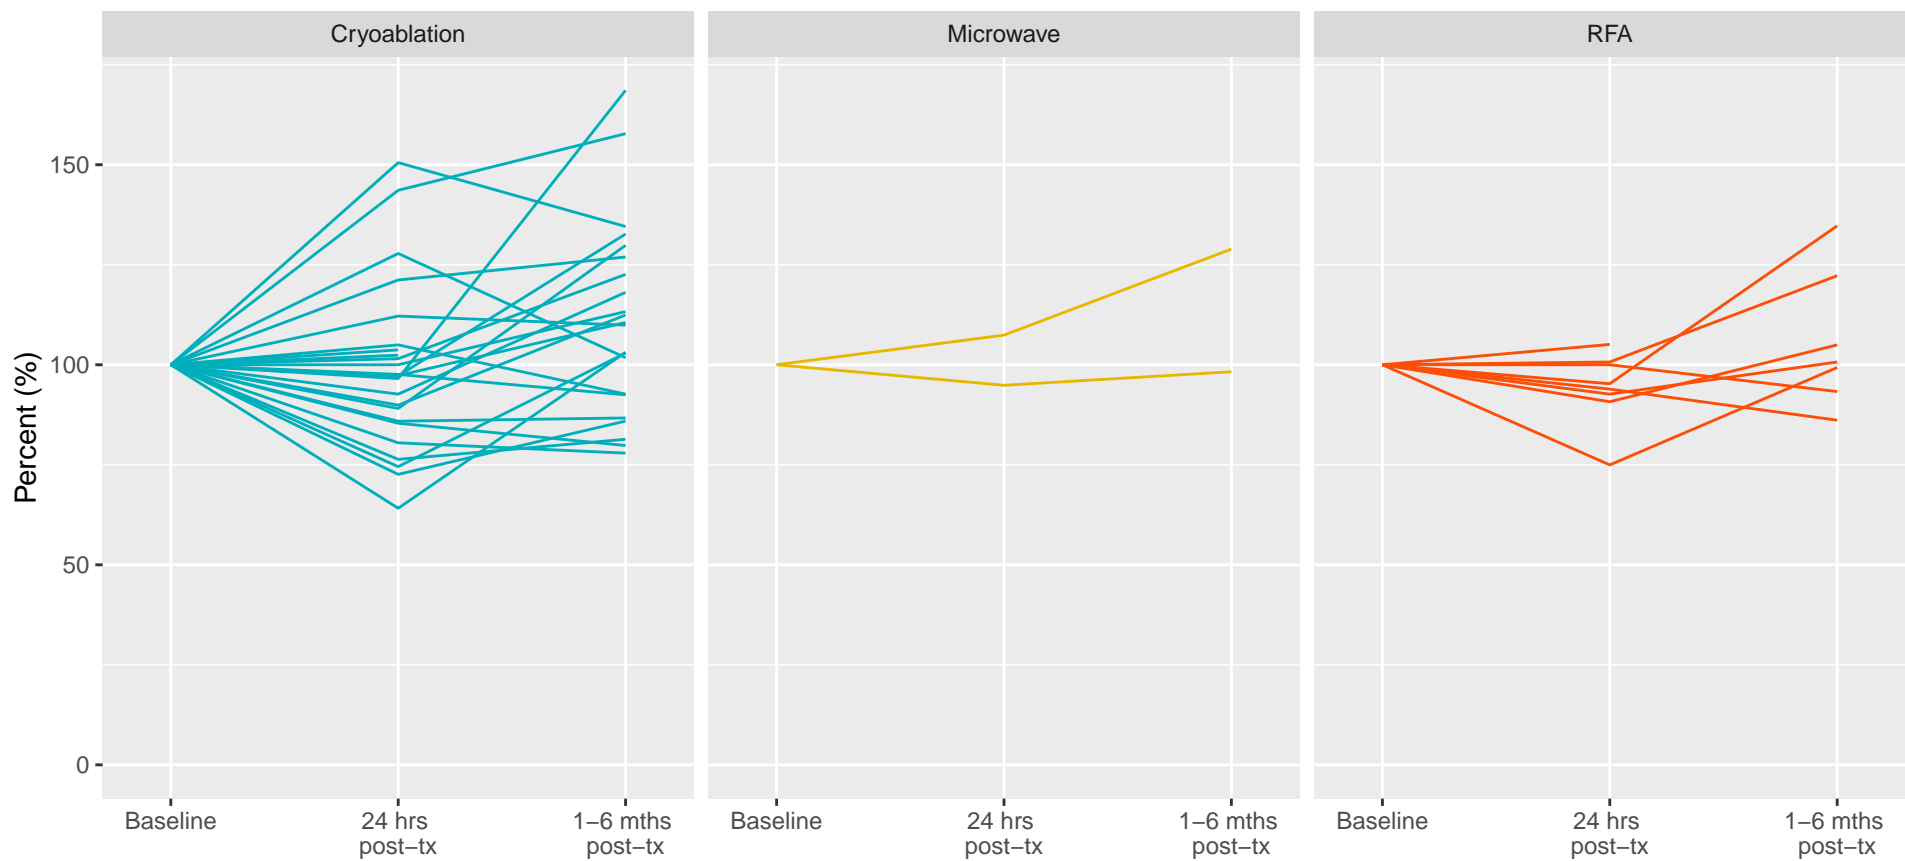

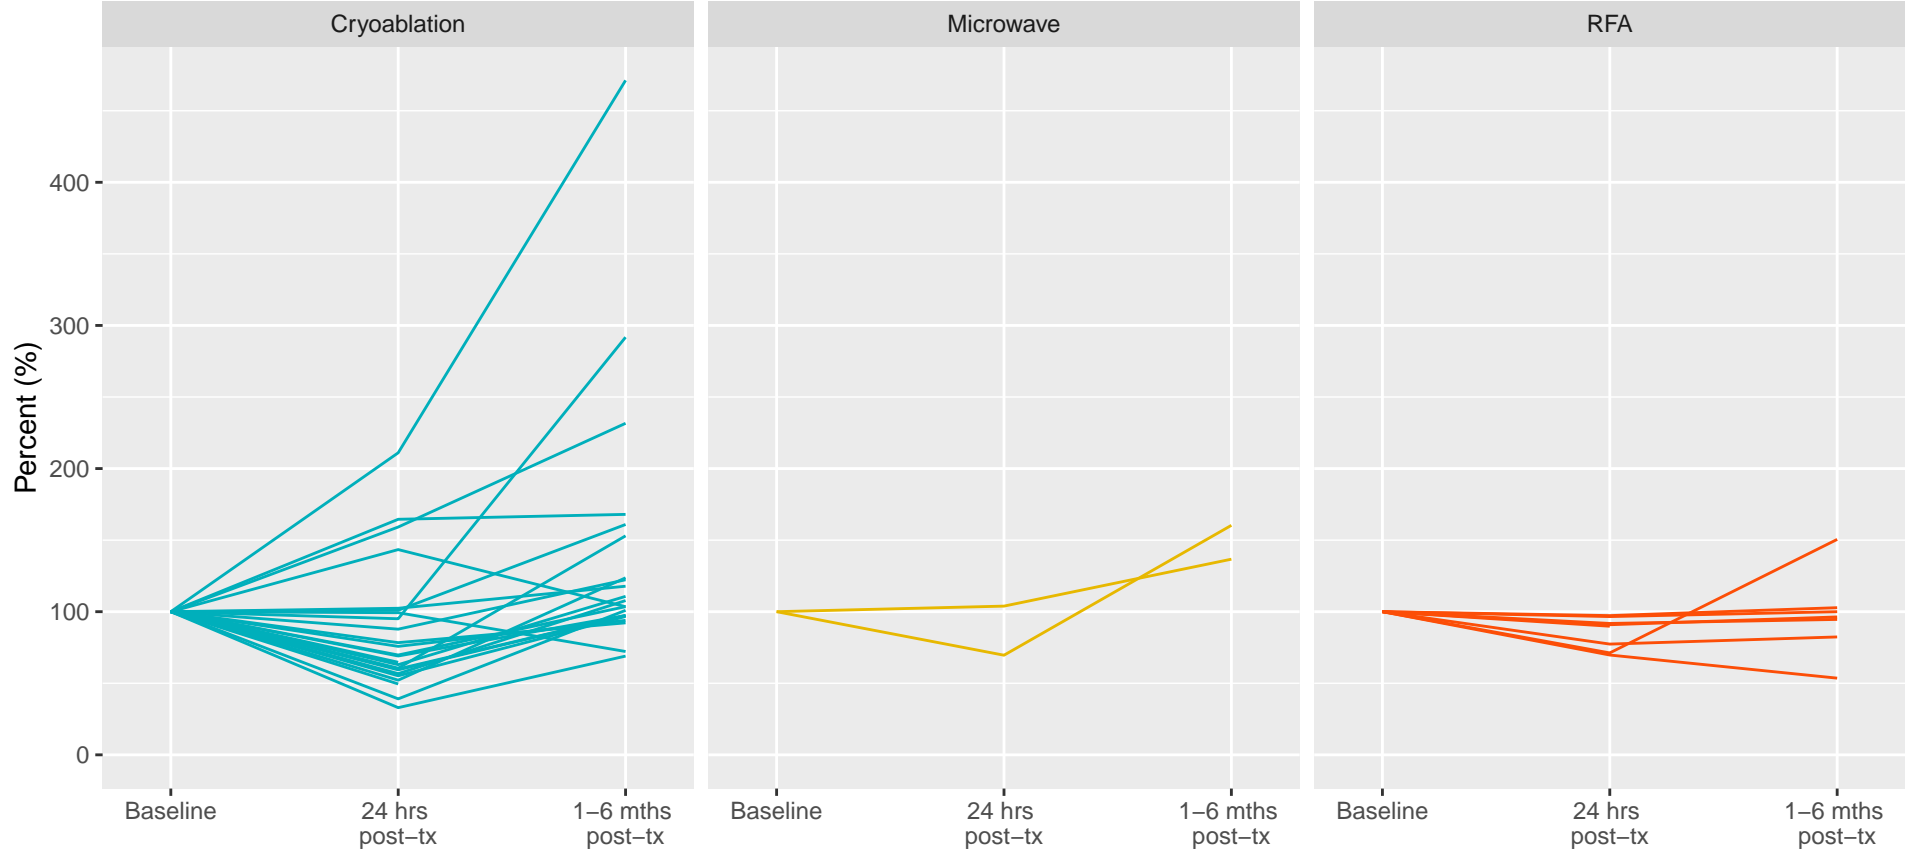

Uniprot ID: P09603, analyte: CSF-1

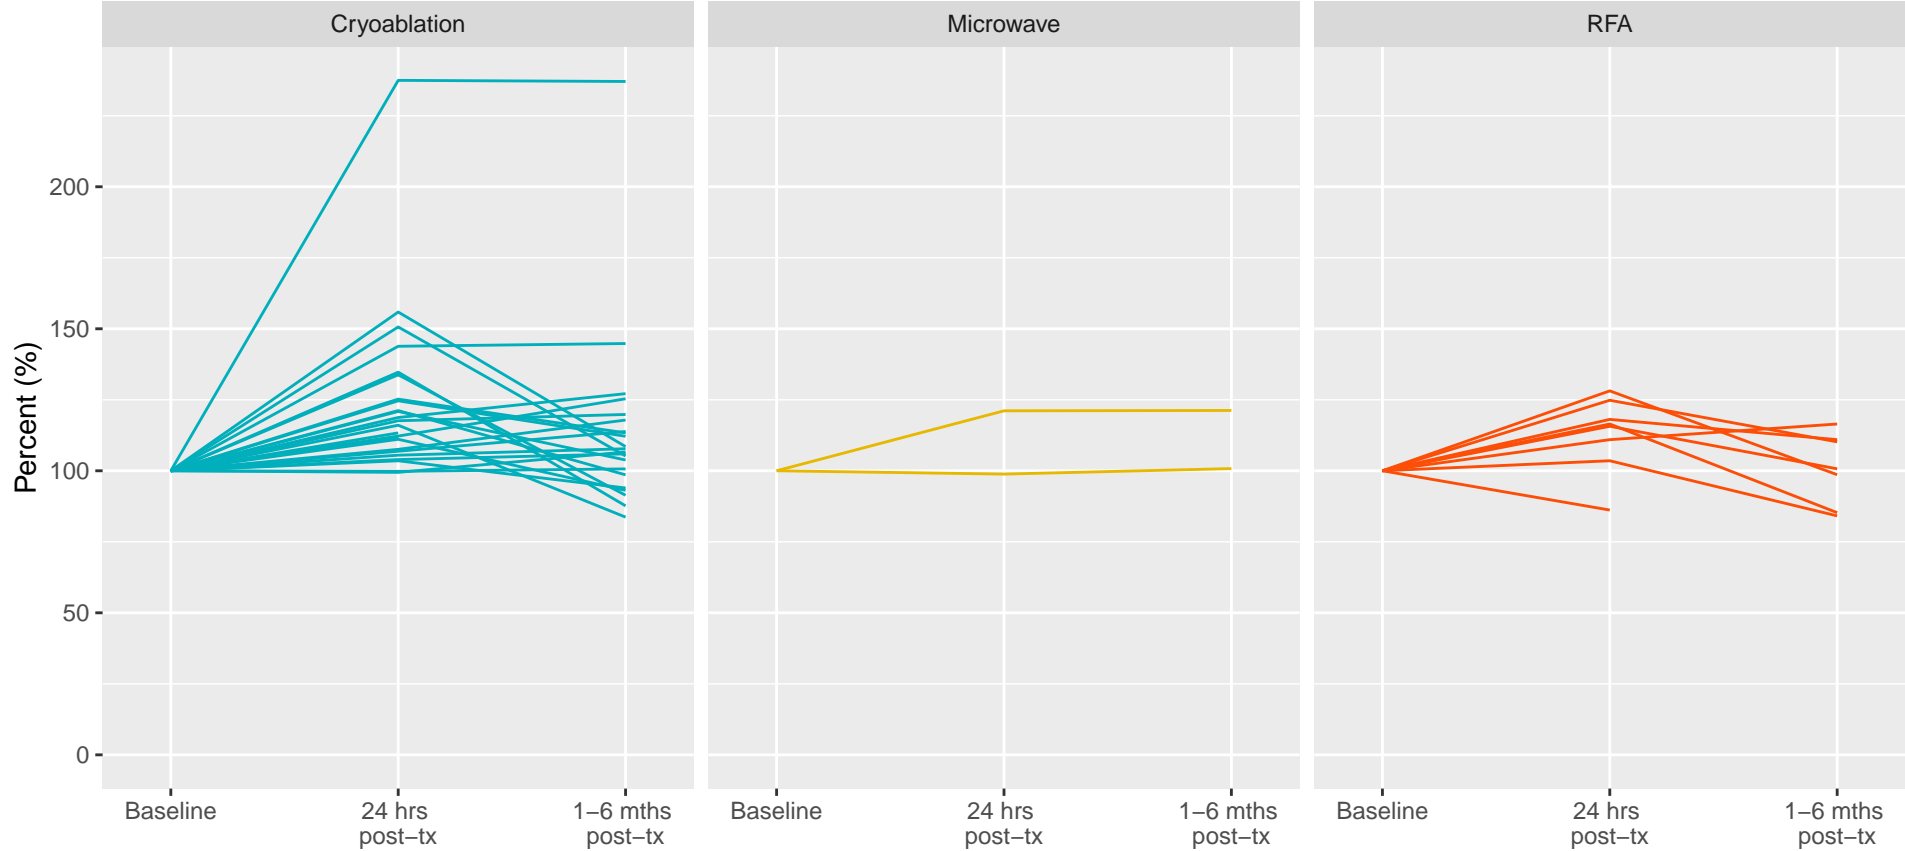

Supplement: s1 [file s1]
