# Supplementary material for: An Exploratory Analysis of Changes in Circulating Plasma Protein Profiles Following Image-Guided Ablation of Renal Tumours Provides Evidence for Effects on Multiple Biological Processes
Source: MDPI journal article supplement (doi:10.3390/cancers13236037), 2021-11-30
Supplement: s1 [file s1]

**Table S2.** Proteins differing significantly ( $p < 0.05$  and  $q < 0.01$ ) between healthy controls (HC;  $n=11$ ) and patients with RCC undergoing ablation at baseline prior to treatment ( $n=34$ ).

| Uniprot accession number | Protein  | HC: median linear NPX (range) | RCC: median linear NPX (range) | p value | q value |
|--------------------------|----------|-------------------------------|--------------------------------|---------|---------|
| P09038                   | FGF2     | 0.95 (0.66–1.36)              | 1.46 (0.96-56.91)              | <0.001  | <0.001  |
| O00182                   | Gal-9    | 118.66 (85.34-178.93)         | 167.72 (127.14-308.18)         | <0.001  | <0.001  |
| P09341                   | CXCL1    | 165.53 (60.35-319.99)         | 303.73 (107.63-1590.19)        | <0.001  | 0.003   |
| Q9NZQ7                   | PD-L1    | 14.43 (11.49-21.67)           | 21.55 (8.20-59.34)             | <0.001  | 0.008   |
| P00519                   | ABL1     | 3.44 (2.38-6.71)              | 7.90 (3.16-50.91)              | <0.001  | 0.004   |
| O95407                   | TNFRSF6B | 8.46 (8.46-5.83)              | 13.95 (6.37-68.13)             | <0.001  | 0.004   |
| P50579                   | MetAP 2  | 6.75 (4.07-13.97)             | 13.99 (5.35-69.47)             | <0.001  | 0.004   |
| O14828                   | SCAMP3   | 5.58 (1.92-11.25)             | 11.91 (2.55-98.80)             | <0.001  | 0.004   |
| Q14508                   | WFDC2    | 74.59 (58.45-105.77)          | 103.25 (57.56-296.07)          | <0.001  | 0.004   |
| P43489                   | TNFRSF4  | 5.35 (3.99-6.82)              | 7.07 (3.30-22.35)              | <0.001  | 0.004   |
| P40222                   | TXLNA    | 7.70 (2.22-17.14)             | 23.05 (4.72-205.07)            | <0.001  | 0.004   |
| P38936                   | CDKN1A   | 1.74 (1.28-5.64)              | 5.77 (2.00-56.90)              | <0.001  | 0.004   |
| P26842                   | CD27     | 146.40 (97.54-195.54)         | 177.41 (104.86-437.14)         | <0.001  | 0.007   |
| P07948                   | LYN      | 1.30 (0.92-3.52)              | 2.66 (1.30-11.90)              | 0.001   | 0.008   |
| P05231                   | IL6      | 2.99 (2.49-9.49)              | 4.56 (2.11-18.71)              | <0.001  | 0.005   |
| P15514                   | AREG     | 2.28 (1.56-2.69)              | 3.00 (1.43-12.09)              | 0.001   | 0.009   |
