# Supplementary material for: An Exploratory Analysis of Changes in Circulating Plasma Protein Profiles Following Image-Guided Ablation of Renal Tumours Provides Evidence for Effects on Multiple Biological Processes
Source: MDPI journal article supplement (doi:10.3390/cancers13236037), 2021-11-30

**Figure S12.** Correlations between the 47 different proteins which changed significantly in patients 24 hours post-CRYO (n=24). a). Correlation matrix showing pair-wise correlations between the change in each protein with the scale bar gradation showing the correlation coefficients from 0 to 1 and blue and red indicating positive and negative correlations respectively; b). Examples of the most strongly correlated protein biomarkers which changed significantly post-CRYO

Figure S6a

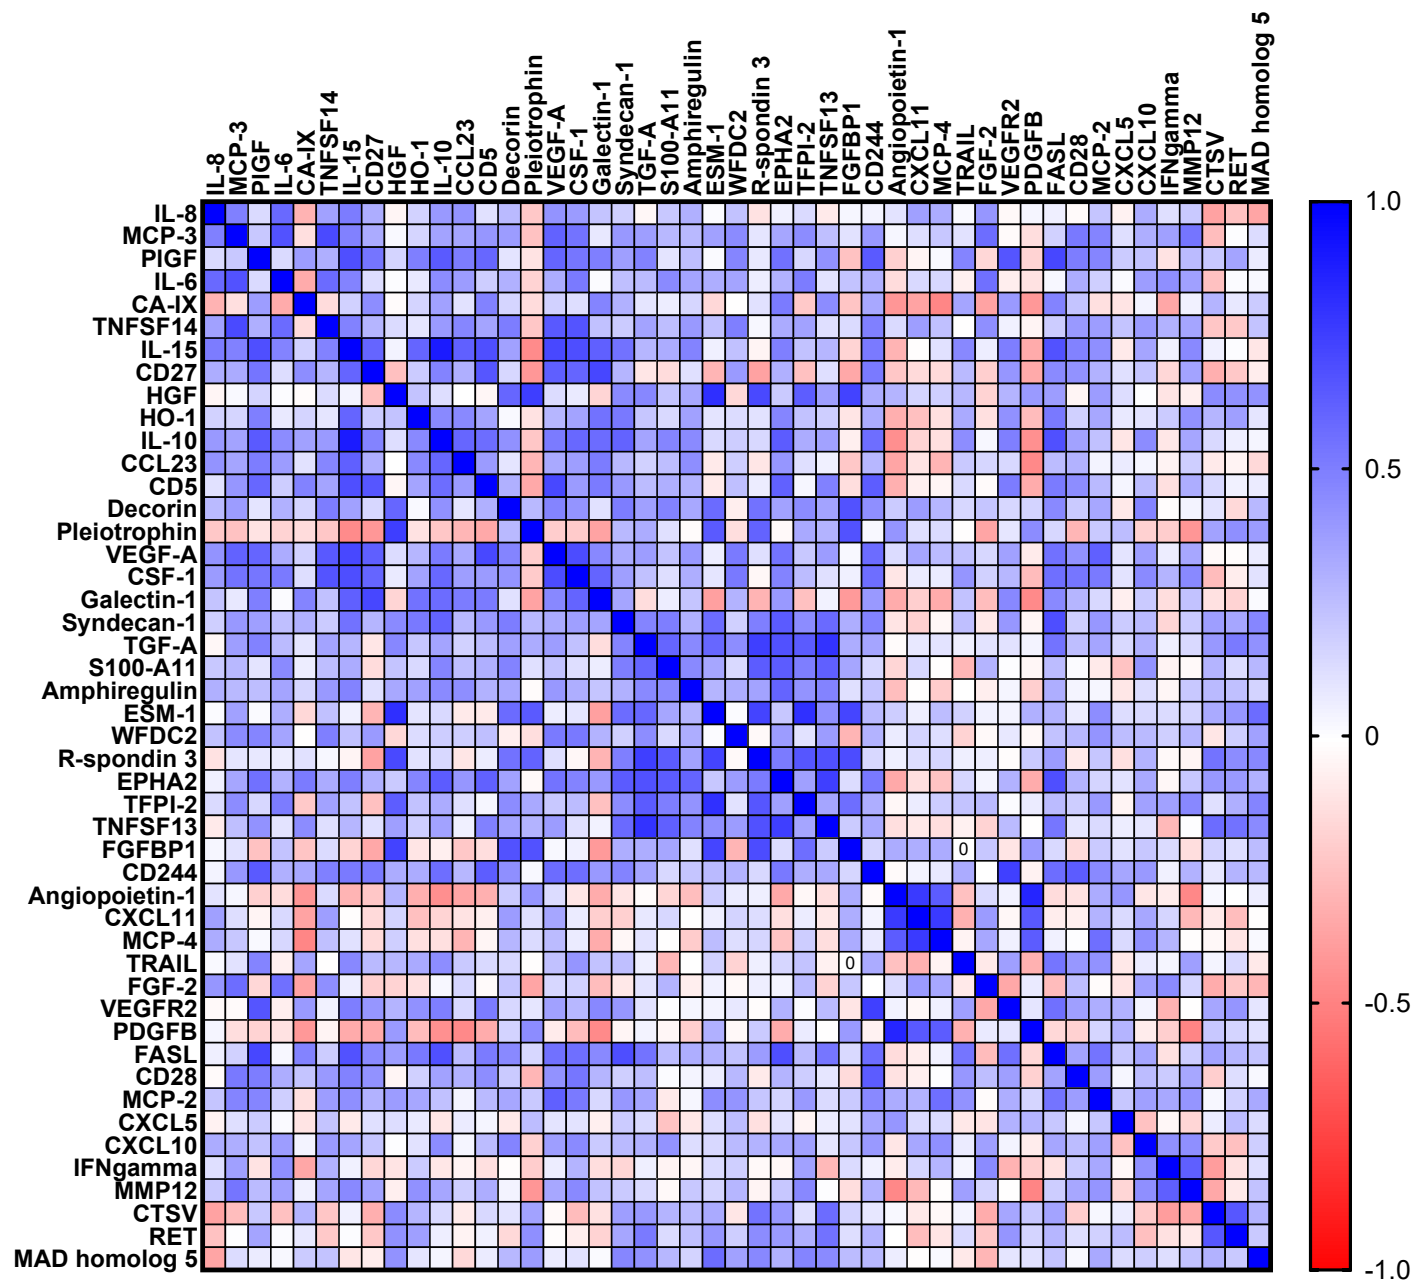

Figure S6b

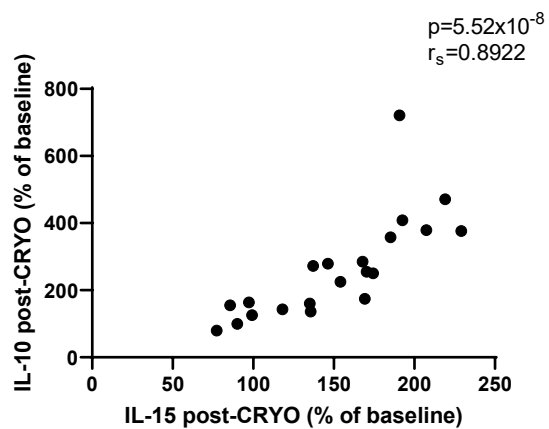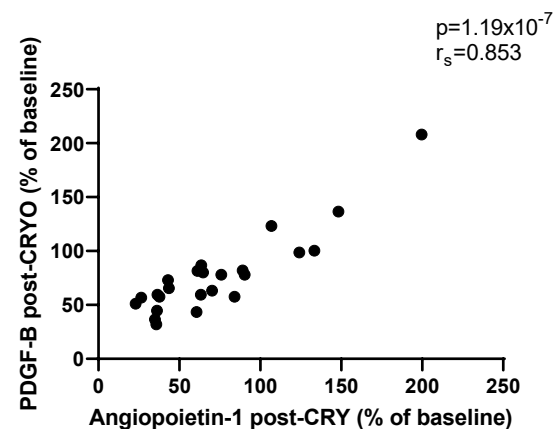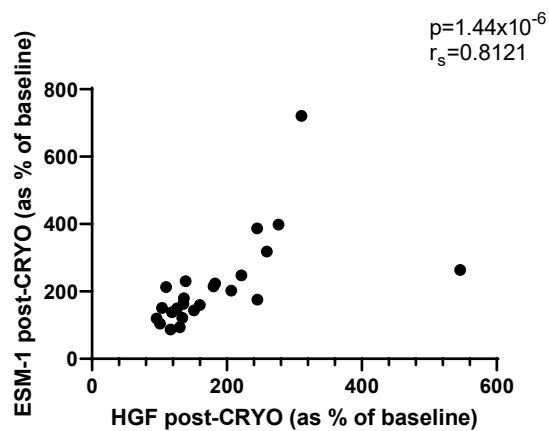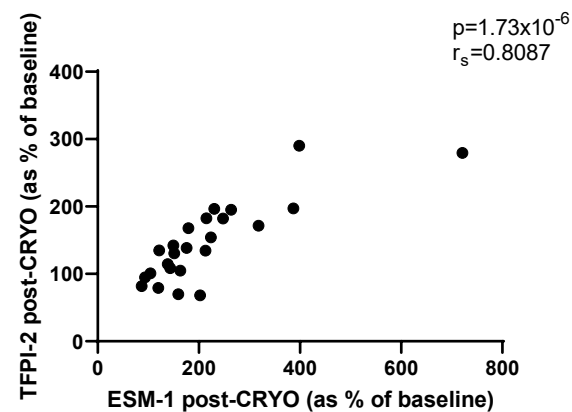

Supplement: s1 [file s1]
