# Supplementary material for: An Exploratory Analysis of Changes in Circulating Plasma Protein Profiles Following Image-Guided Ablation of Renal Tumours Provides Evidence for Effects on Multiple Biological Processes
Source: MDPI journal article supplement (doi:10.3390/cancers13236037), 2021-11-30
Supplement: s1 [file s1]

**Figure S7.** Longitudinal profiles of all plasma proteins, prior to and post-CRYO (n=25 patients). Results for each protein are expressed as a % of the reference baseline (TP2; 100%) and are shown with different colours indicating the different histological subtypes of RCC.

Uniprot ID: P10145, analyte: IL8

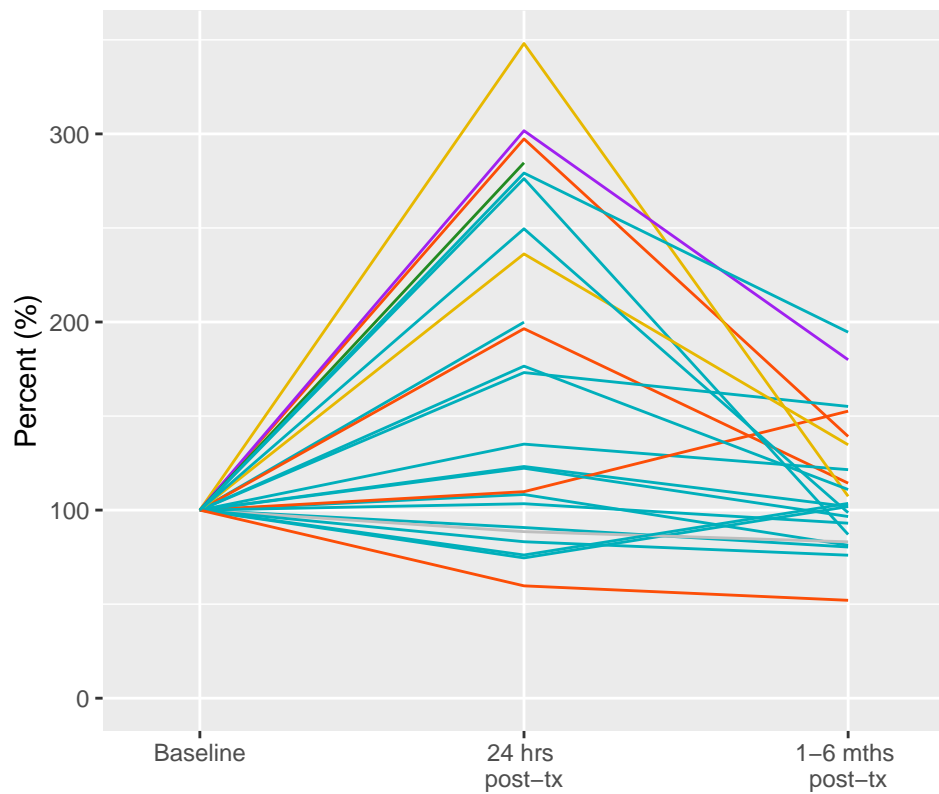

Uniprot ID: Q07011, analyte: TNFRSF9

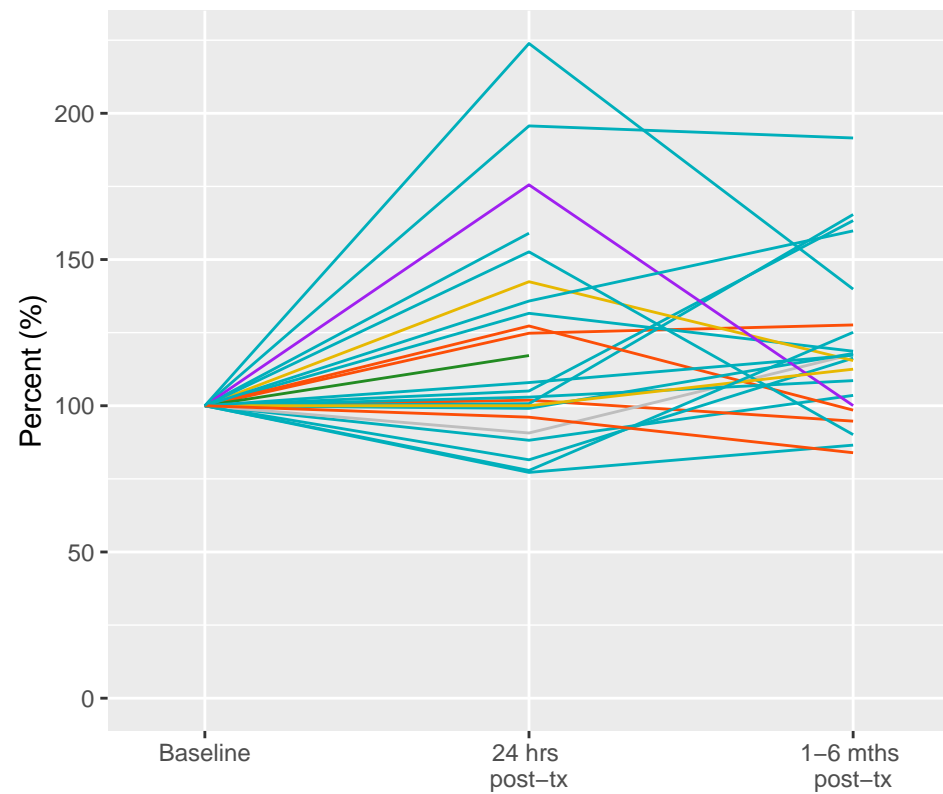

Uniprot ID: Q02763, analyte: TIE2

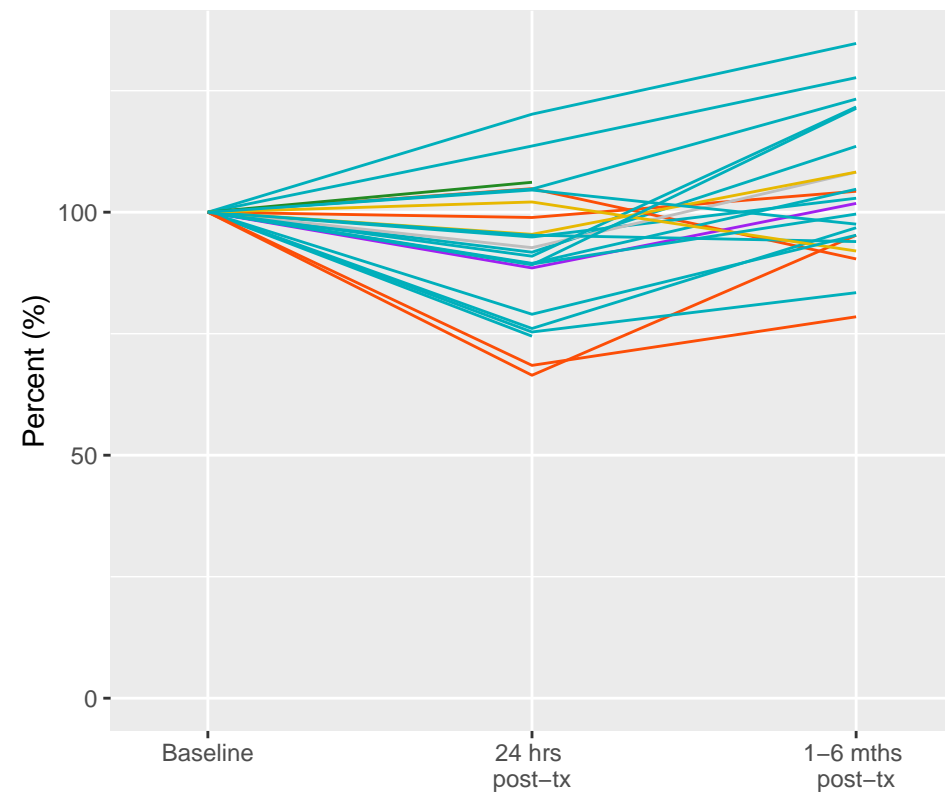

Figure S5

Histology

|             |            |       |           |                   |         |
|-------------|------------|-------|-----------|-------------------|---------|
| Chromophobe | Clear cell | Mixed | Papillary | TFE translocation | Unknown |
|-------------|------------|-------|-----------|-------------------|---------|

Uniprot ID: P80098, analyte: MCP-3

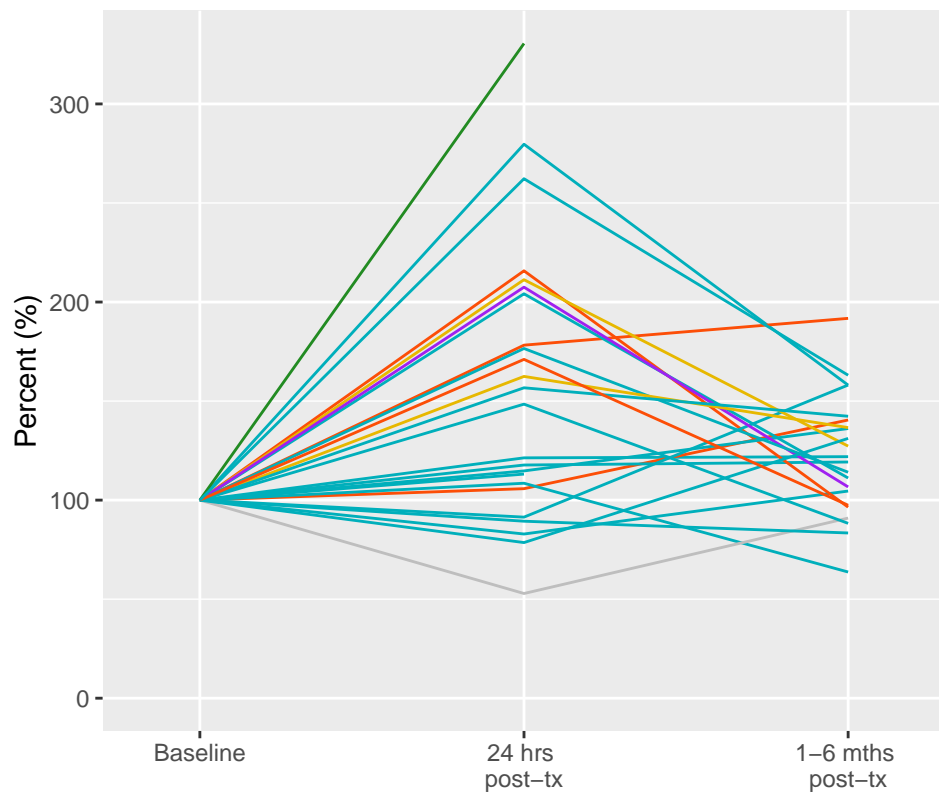

Uniprot ID: P29965, analyte: CD40-L

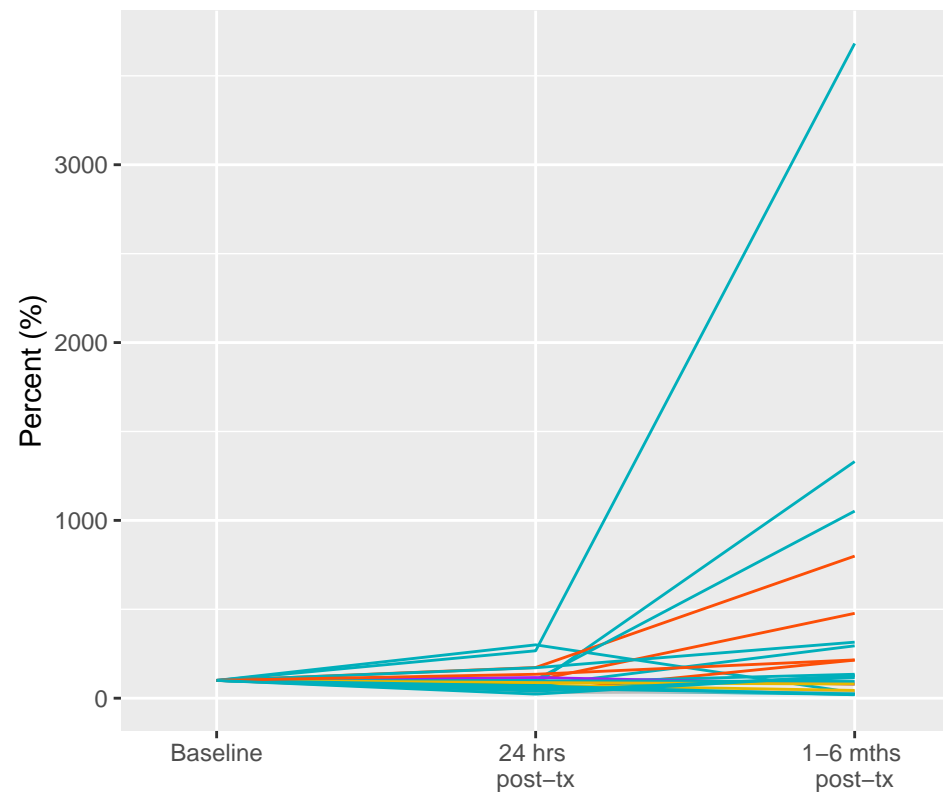

Uniprot ID: P01583, analyte: IL-1 alpha

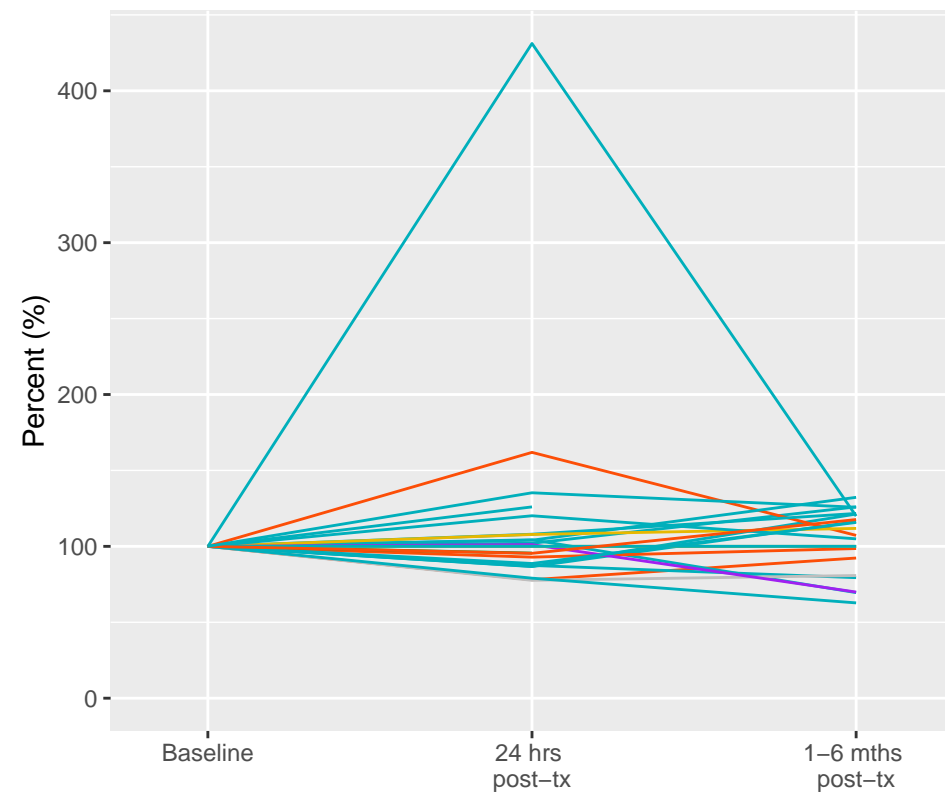

Histology

- Chromophobe
- Clear cell
- Mixed
- Papillary
- TFE translocation
- Unknown

Uniprot ID: Q9BZW8, analyte: CD244

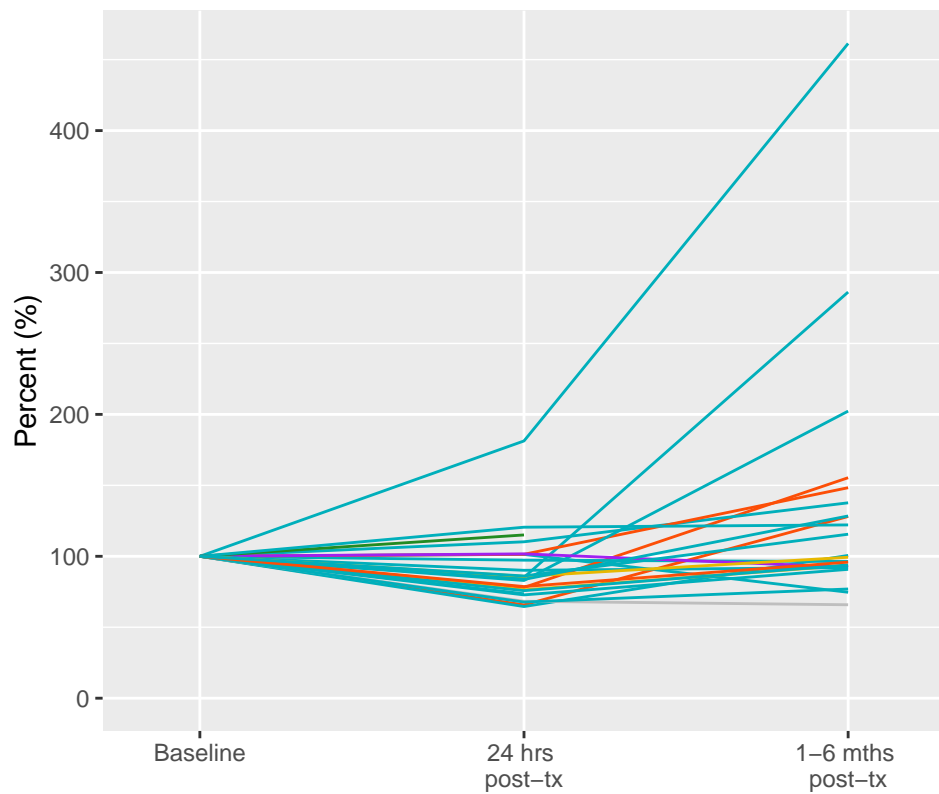

Uniprot ID: P01133, analyte: EGF

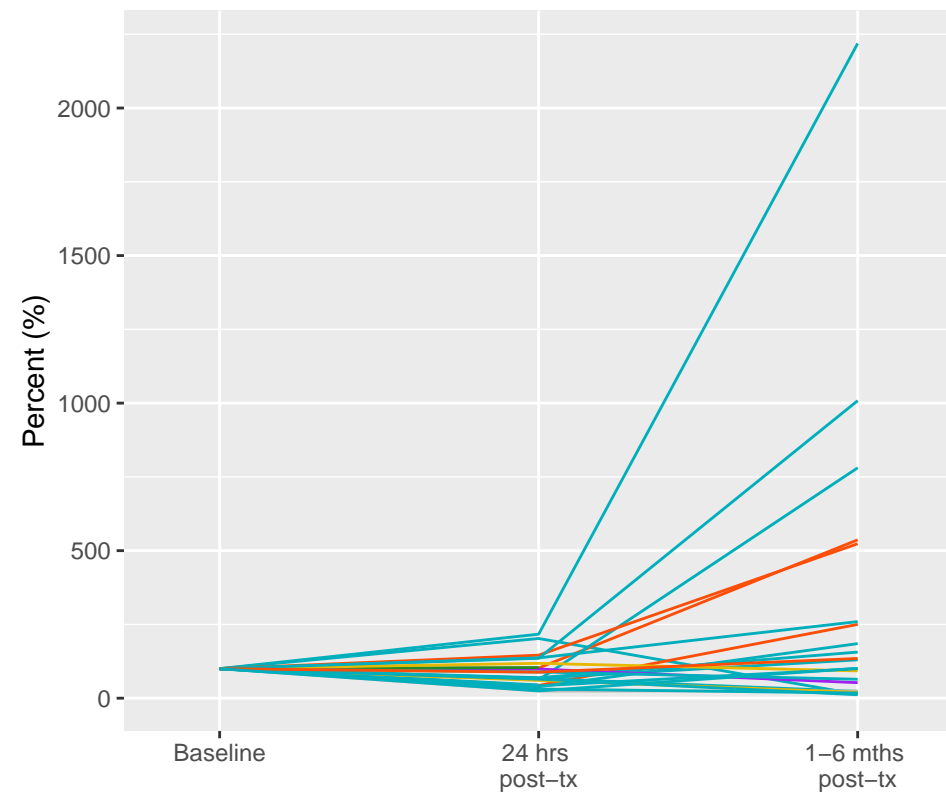

Uniprot ID: Q15389, analyte: ANGPT1

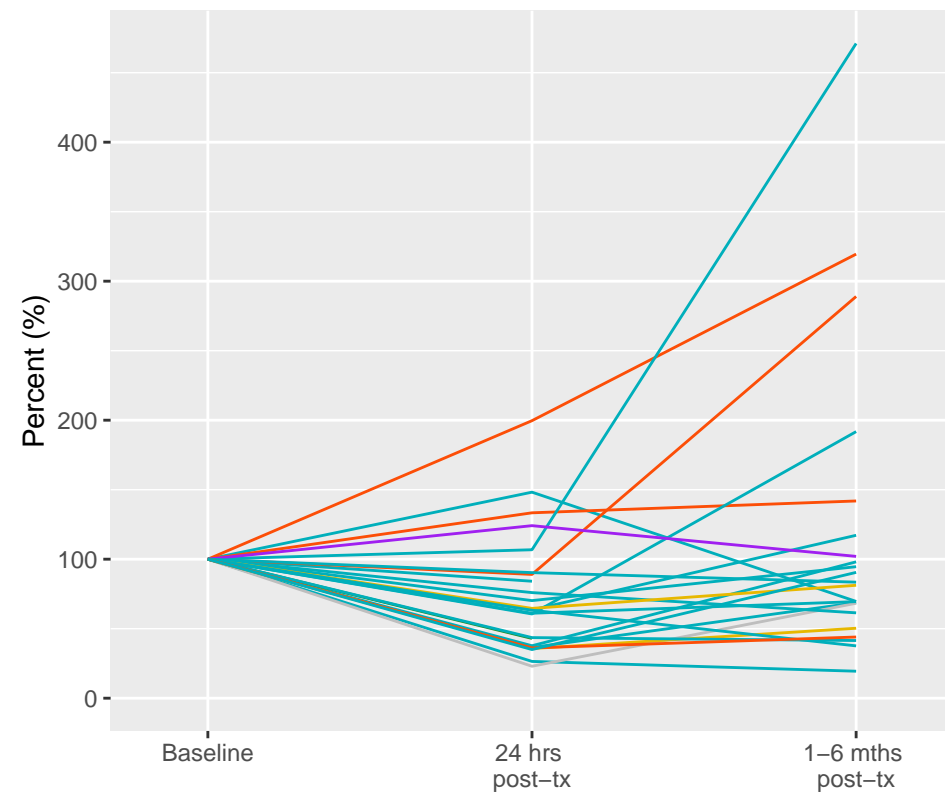

Histology

|             |            |       |           |                   |         |
|-------------|------------|-------|-----------|-------------------|---------|
| Chromophobe | Clear cell | Mixed | Papillary | TFE translocation | Unknown |
|-------------|------------|-------|-----------|-------------------|---------|

Uniprot ID: P13232, analyte: IL7

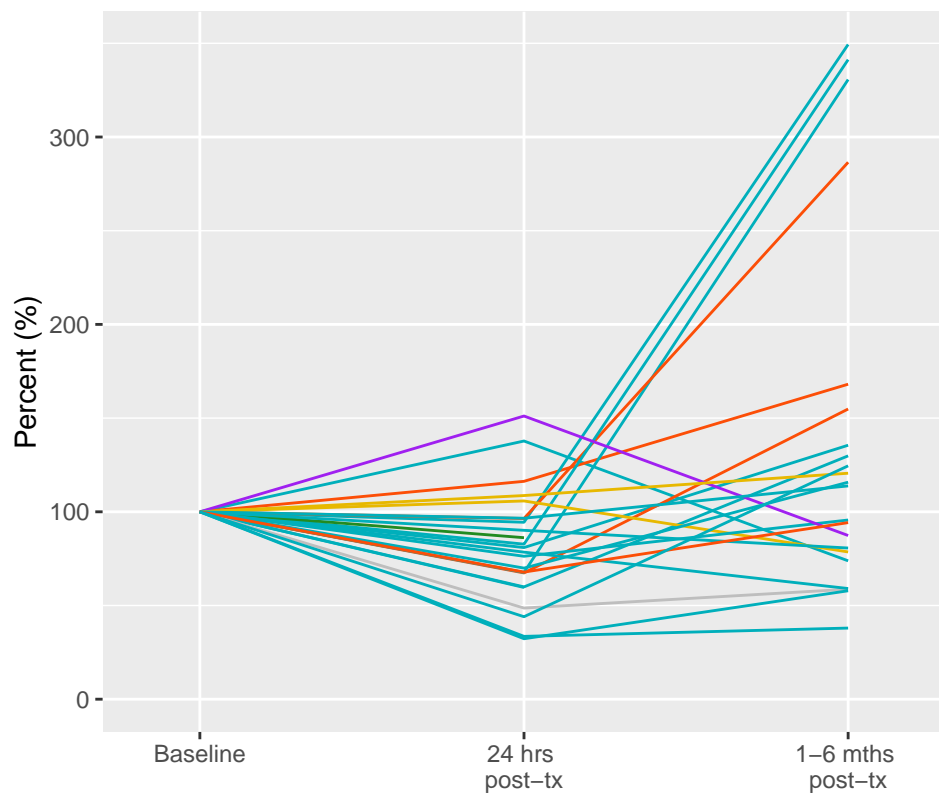

Uniprot ID: P49763, analyte: PGF

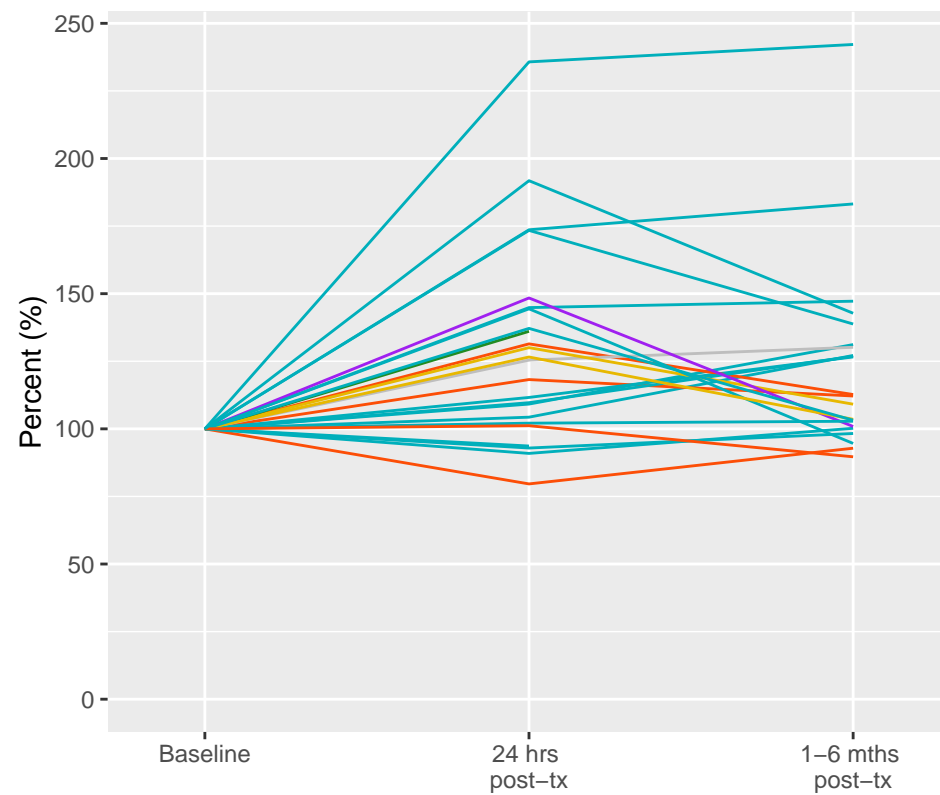

Uniprot ID: P05231, analyte: IL6

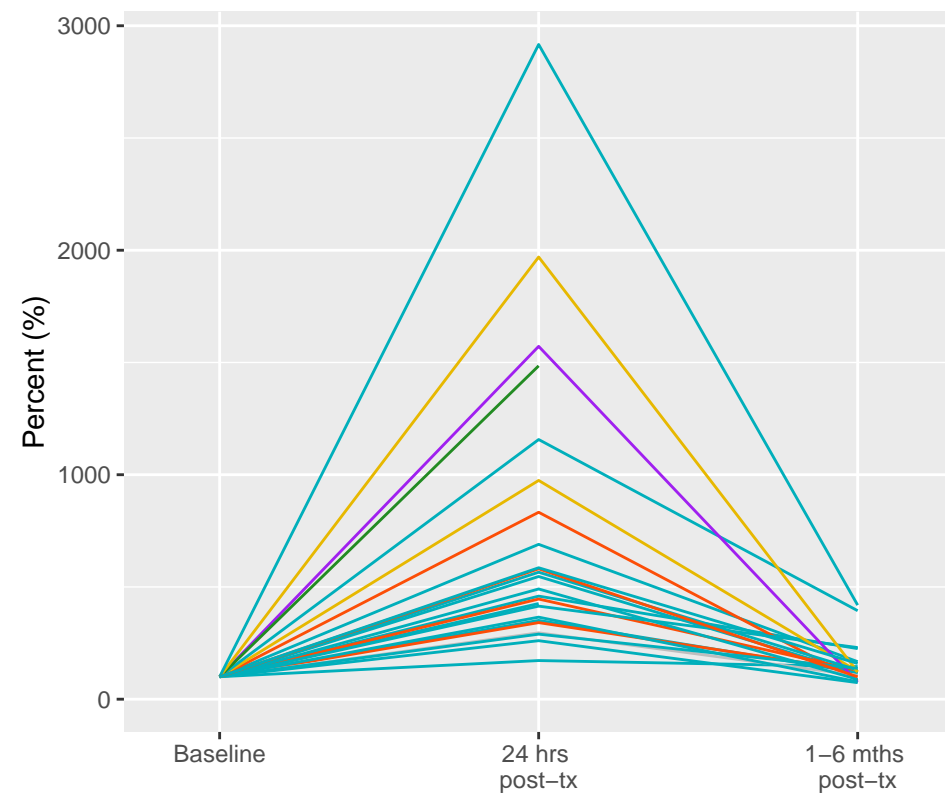

Histology

|             |            |       |           |                   |         |
|-------------|------------|-------|-----------|-------------------|---------|
| Chromophobe | Clear cell | Mixed | Papillary | TFE translocation | Unknown |
|-------------|------------|-------|-----------|-------------------|---------|

Uniprot ID: Q9Y653, analyte: ADGRG1

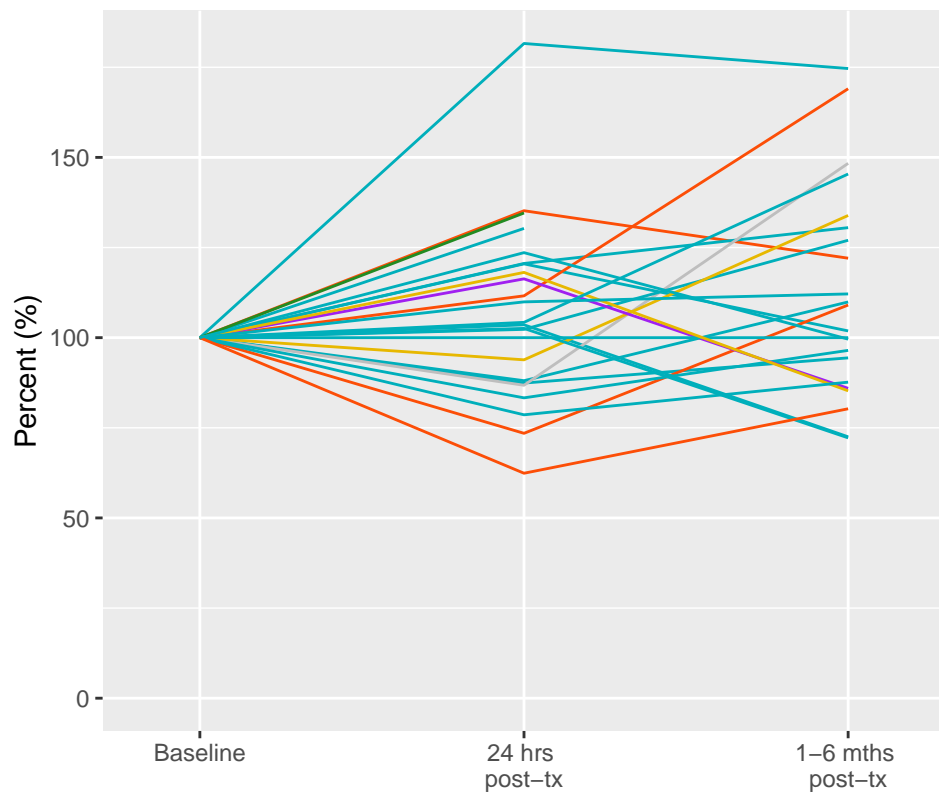

Uniprot ID: P13500, analyte: MCP-1

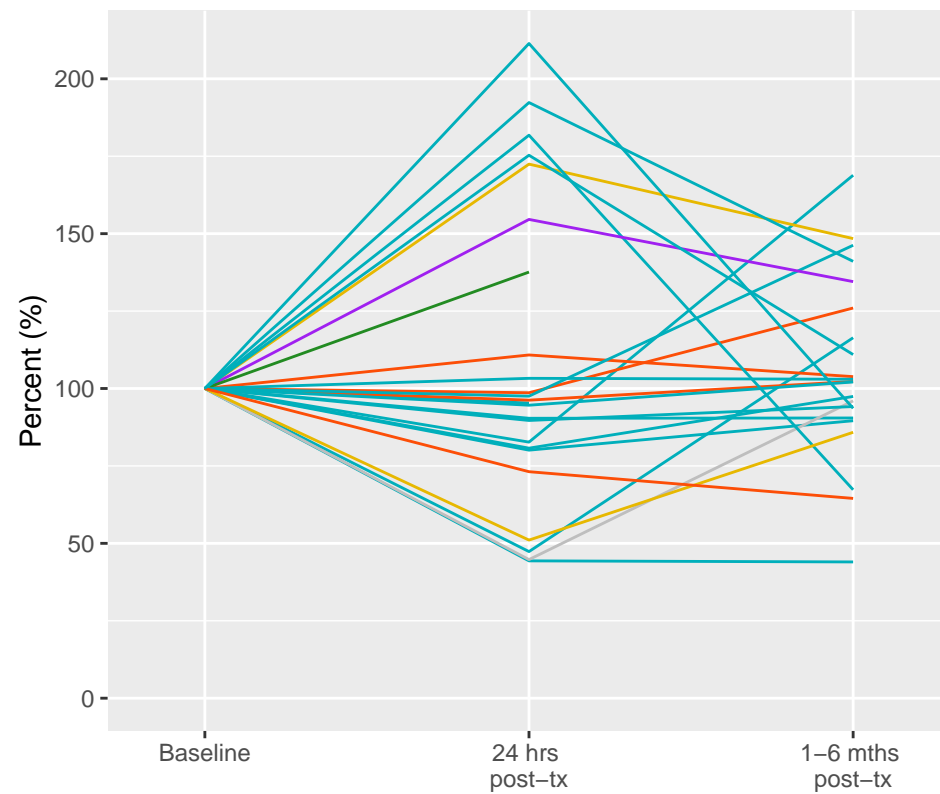

Uniprot ID: O95727, analyte: CRTAM

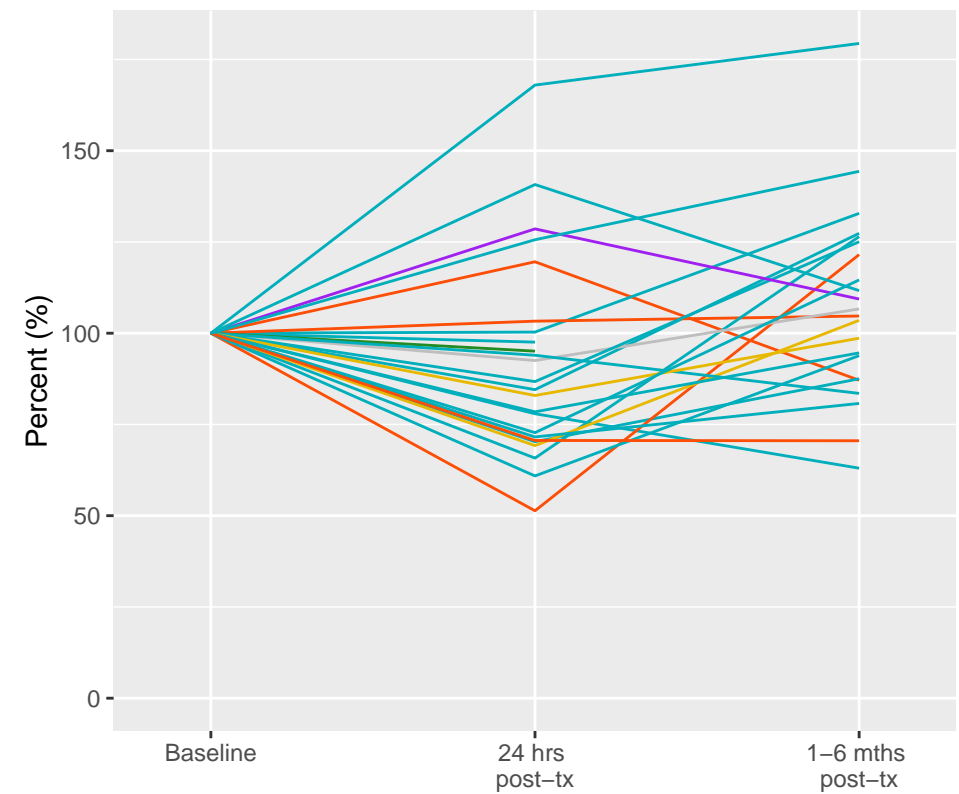

Histology

|             |            |       |           |                   |         |
|-------------|------------|-------|-----------|-------------------|---------|
| Chromophobe | Clear cell | Mixed | Papillary | TFE translocation | Unknown |
|-------------|------------|-------|-----------|-------------------|---------|

Uniprot ID: O14625, analyte: CXCL11

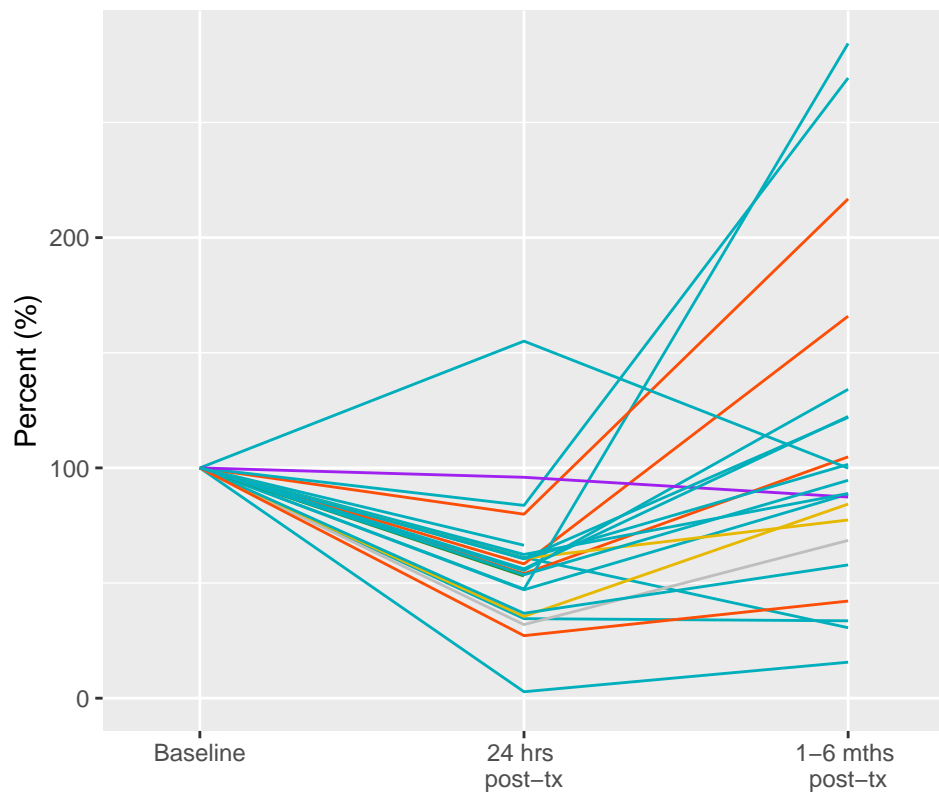

Uniprot ID: Q99616, analyte: MCP-4

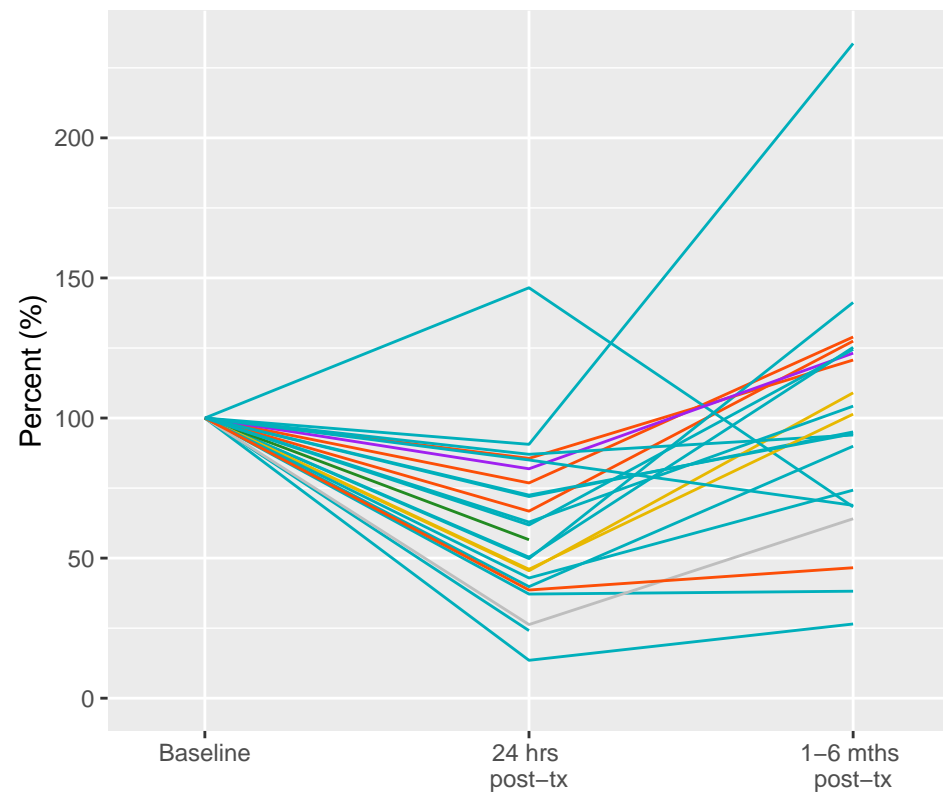

Uniprot ID: P50591, analyte: TRAIL

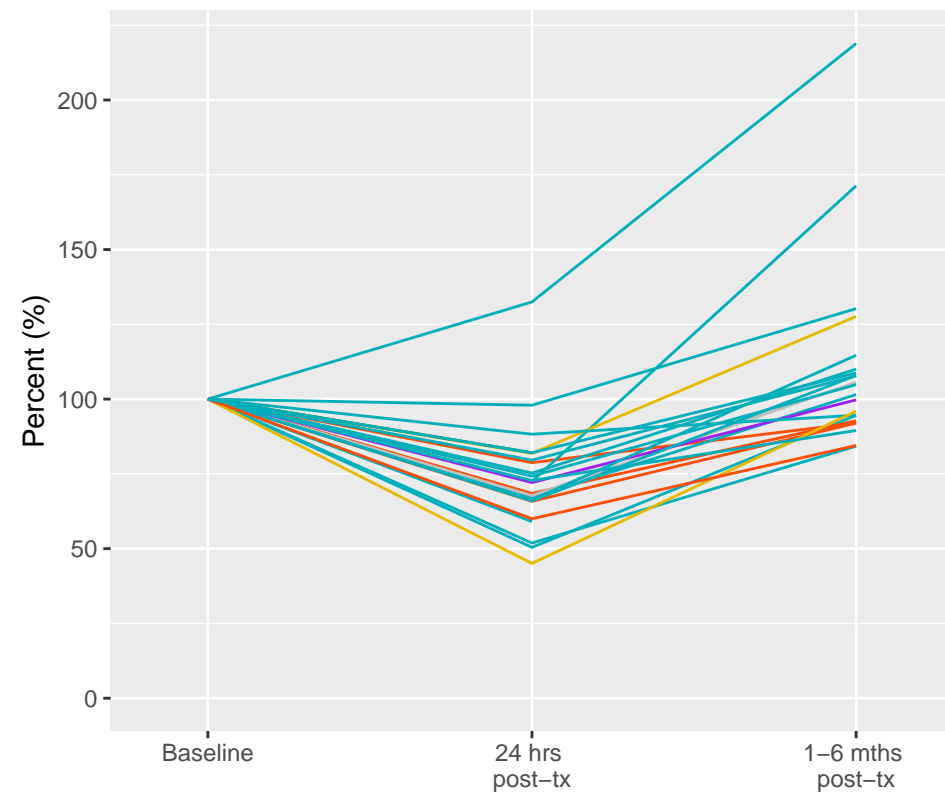

Histology

|             |            |       |           |                   |         |
|-------------|------------|-------|-----------|-------------------|---------|
| Chromophobe | Clear cell | Mixed | Papillary | TFE translocation | Unknown |
|-------------|------------|-------|-----------|-------------------|---------|

Uniprot ID: P09038, analyte: FGF2

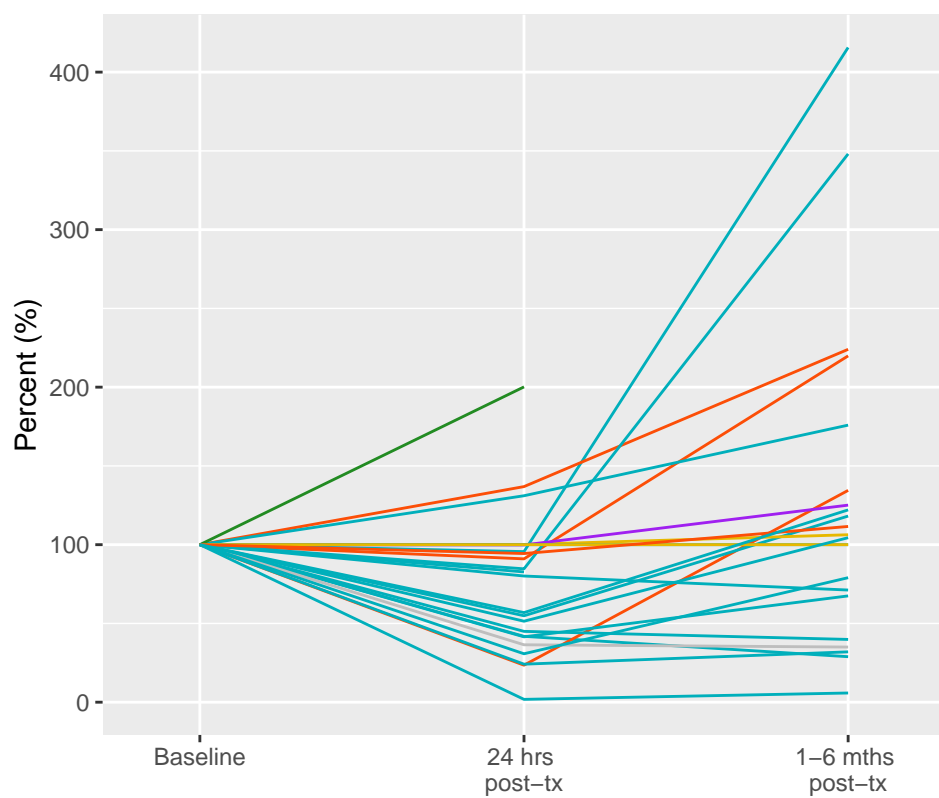

Uniprot ID: Q07325, analyte: CXCL9

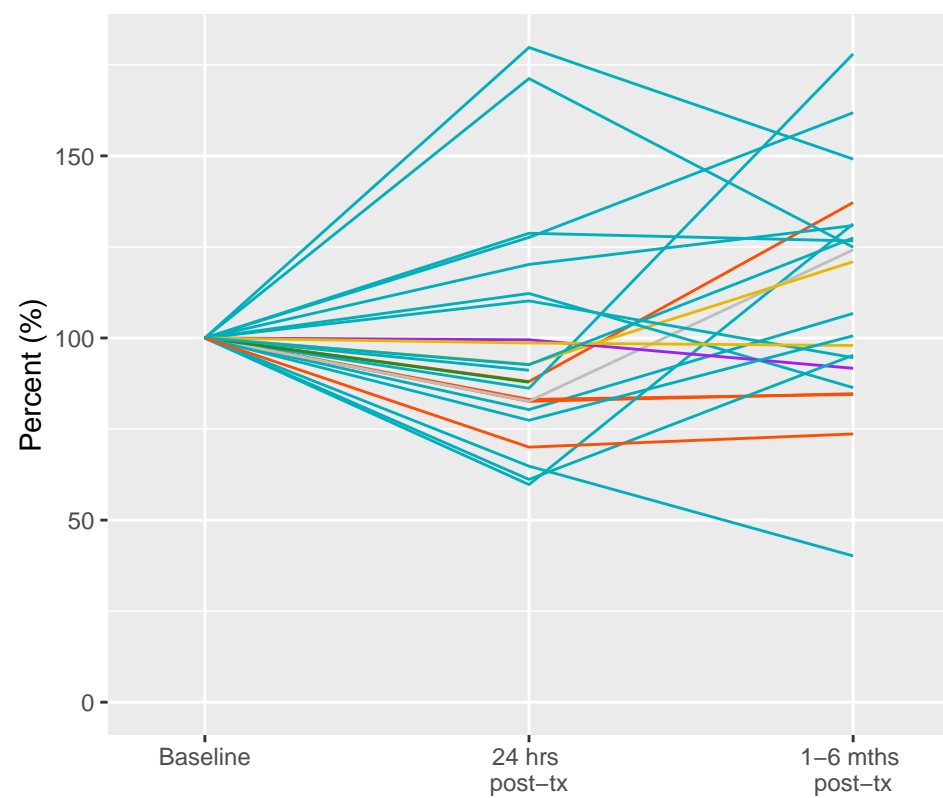

Uniprot ID: P01732, analyte: CD8A

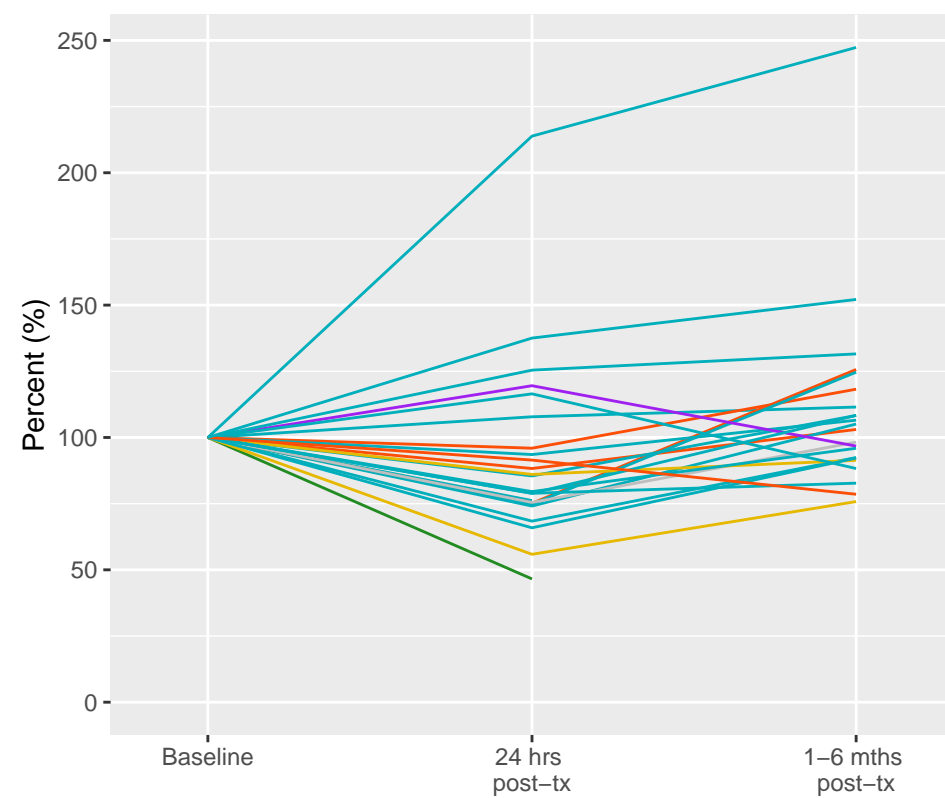

Histology

|             |            |       |           |                   |         |
|-------------|------------|-------|-----------|-------------------|---------|
| Chromophobe | Clear cell | Mixed | Papillary | TFE translocation | Unknown |
|-------------|------------|-------|-----------|-------------------|---------|



Uniprot ID: Q16790, analyte: CAIX

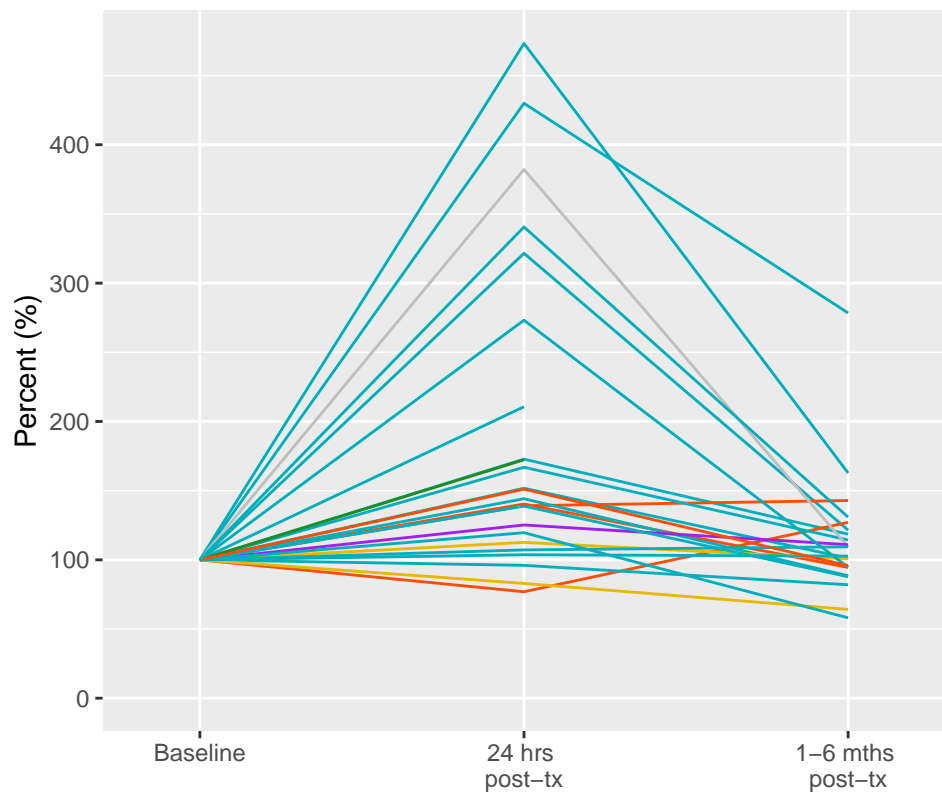

Uniprot ID: Q8WXI7, analyte: MUC-16

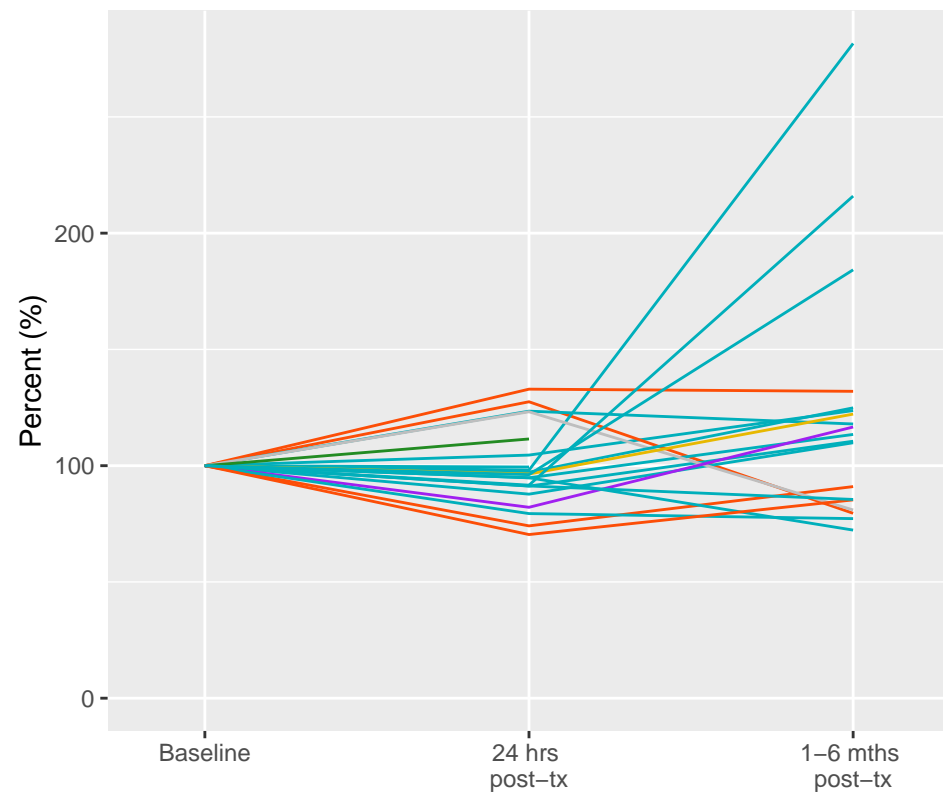

Uniprot ID: P00813, analyte: ADA

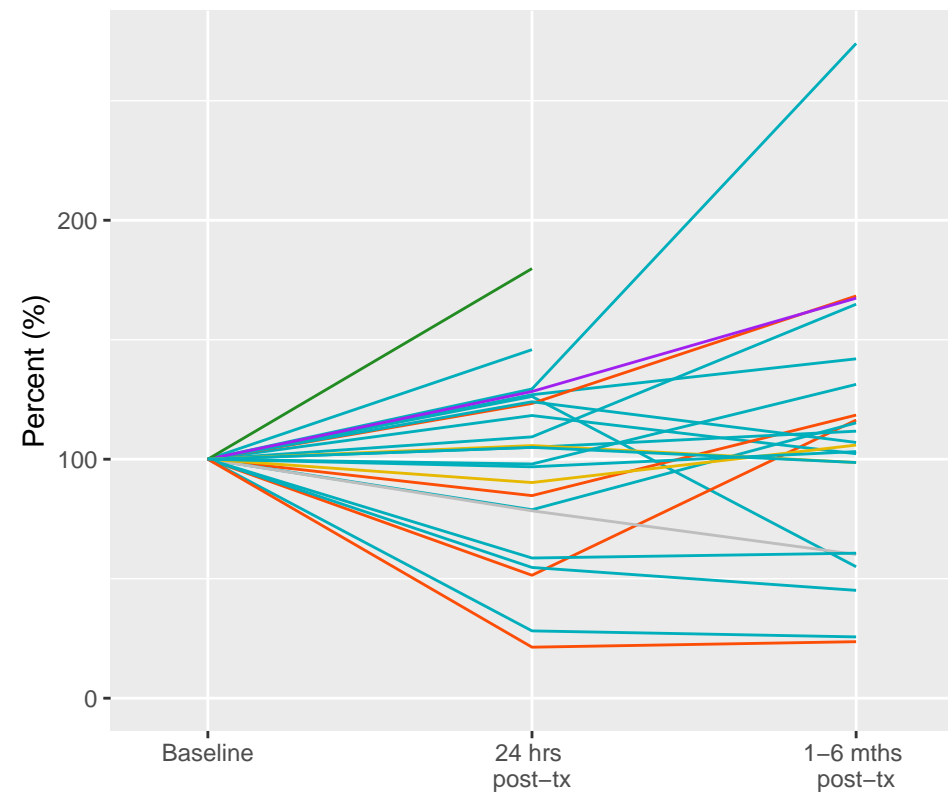

Histology

|             |            |       |           |                   |         |
|-------------|------------|-------|-----------|-------------------|---------|
| Chromophobe | Clear cell | Mixed | Papillary | TFE translocation | Unknown |
|-------------|------------|-------|-----------|-------------------|---------|

Uniprot ID: P01730, analyte: CD4

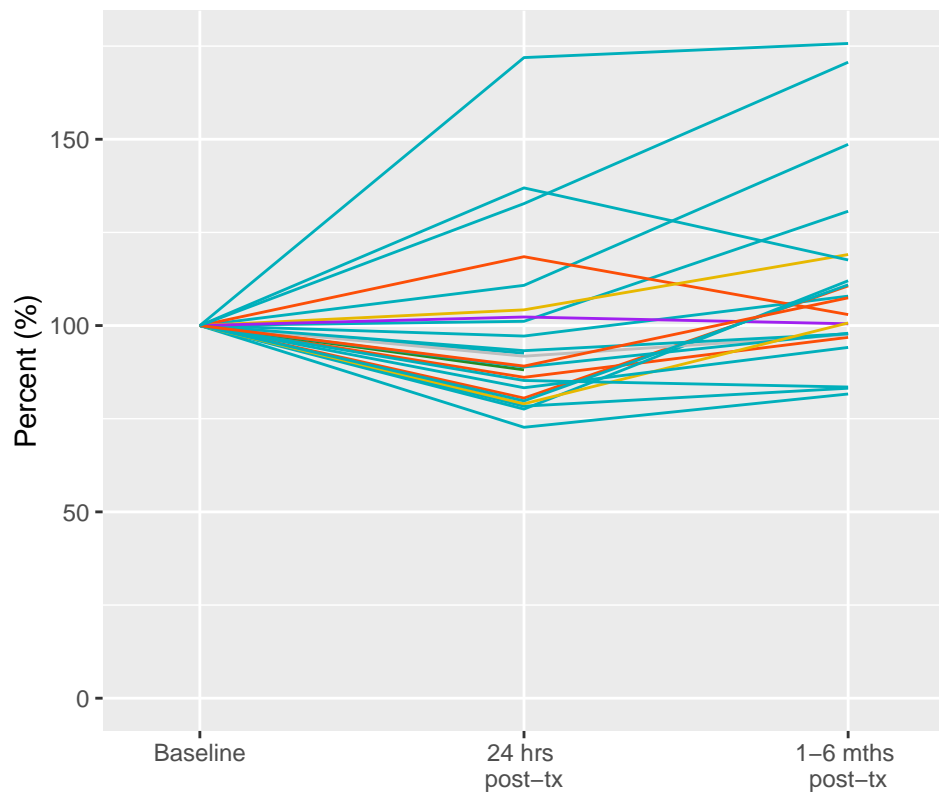

Uniprot ID: P29474, analyte: NOS3

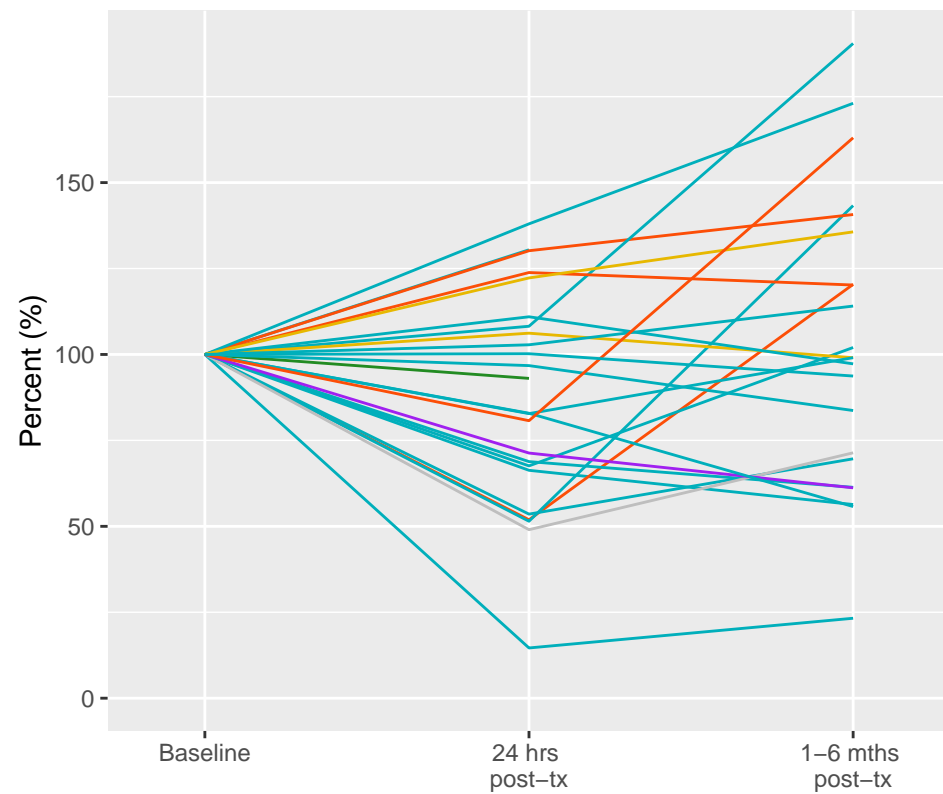

Uniprot ID: P60568, analyte: IL2

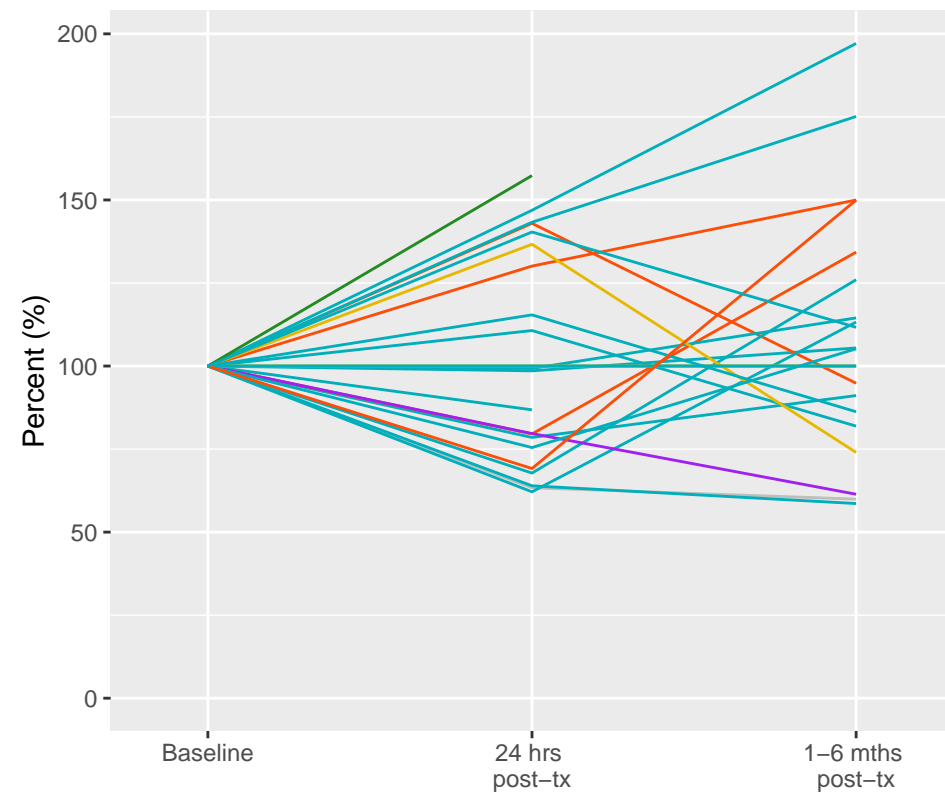

Histology

|             |            |       |           |                   |         |
|-------------|------------|-------|-----------|-------------------|---------|
| Chromophobe | Clear cell | Mixed | Papillary | TFE translocation | Unknown |
|-------------|------------|-------|-----------|-------------------|---------|

Uniprot ID: O00182, analyte: Gal-9

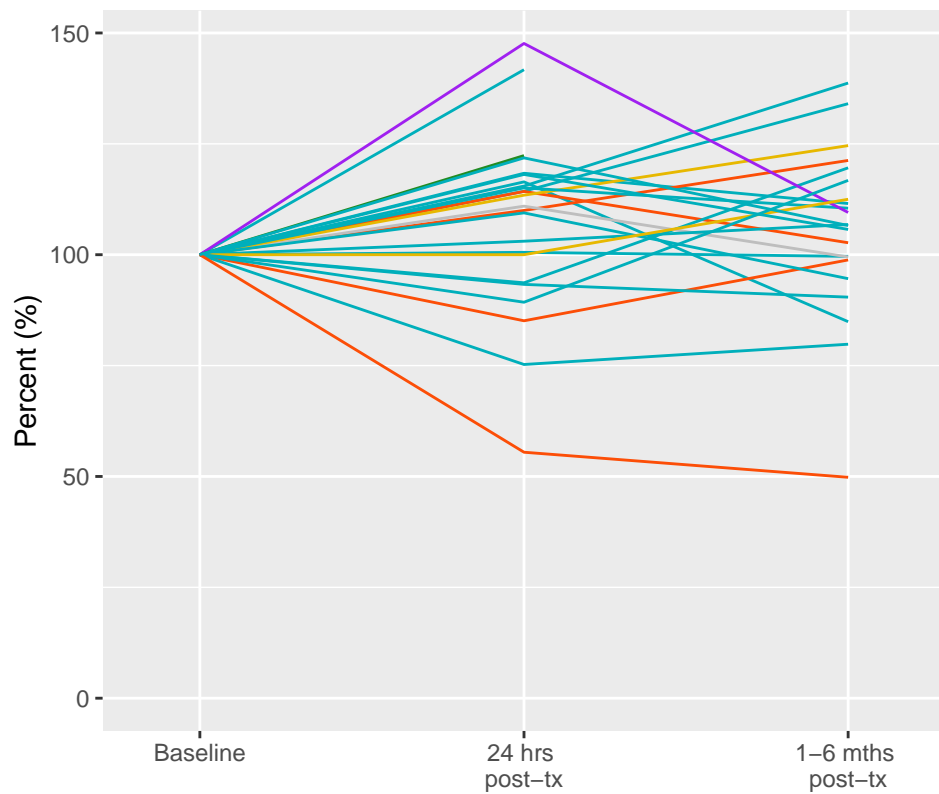

Uniprot ID: P35968, analyte: VEGFR-2

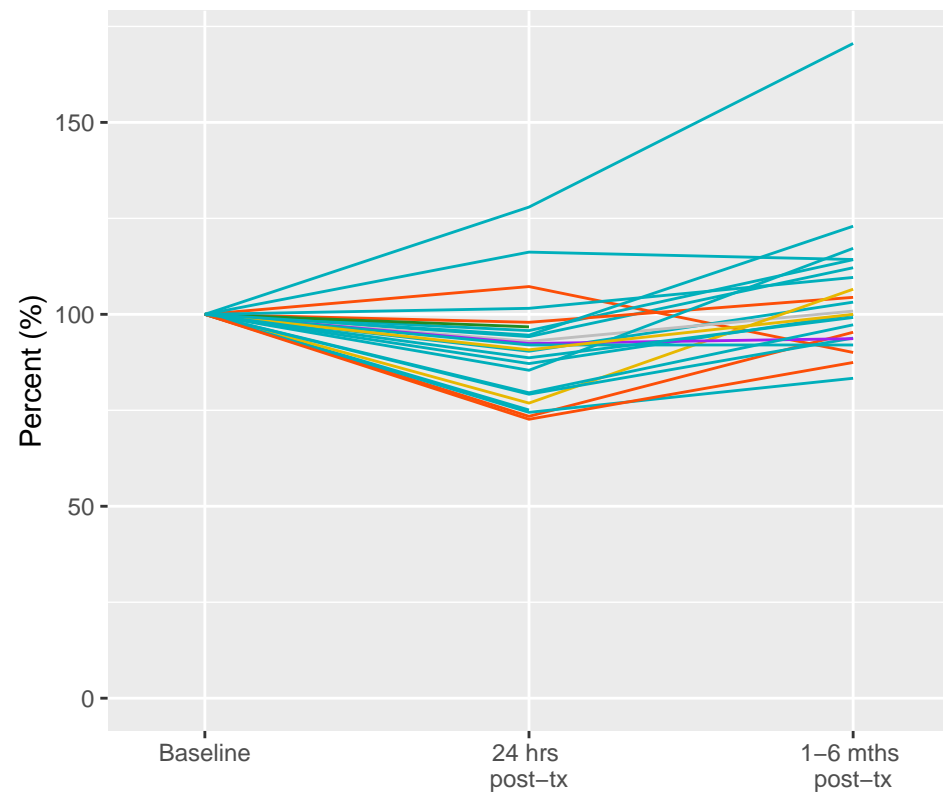

Uniprot ID: P25942, analyte: CD40

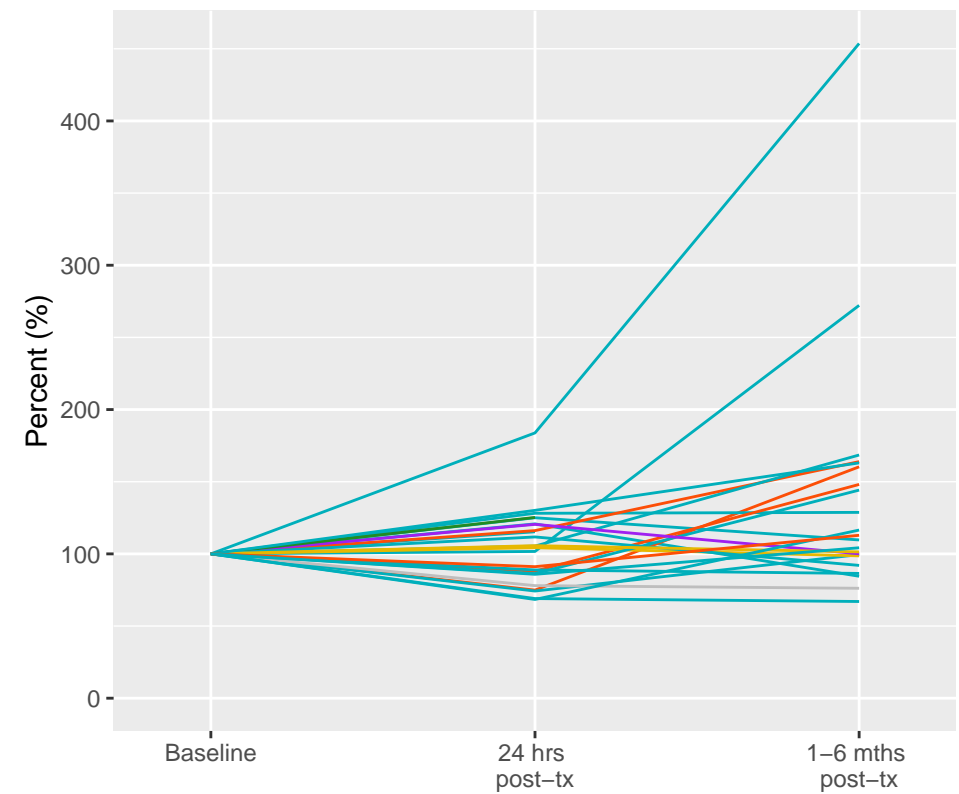

Histology

|             |            |       |           |                   |         |
|-------------|------------|-------|-----------|-------------------|---------|
| Chromophobe | Clear cell | Mixed | Papillary | TFE translocation | Unknown |
|-------------|------------|-------|-----------|-------------------|---------|

Uniprot ID: Q14116, analyte: IL18

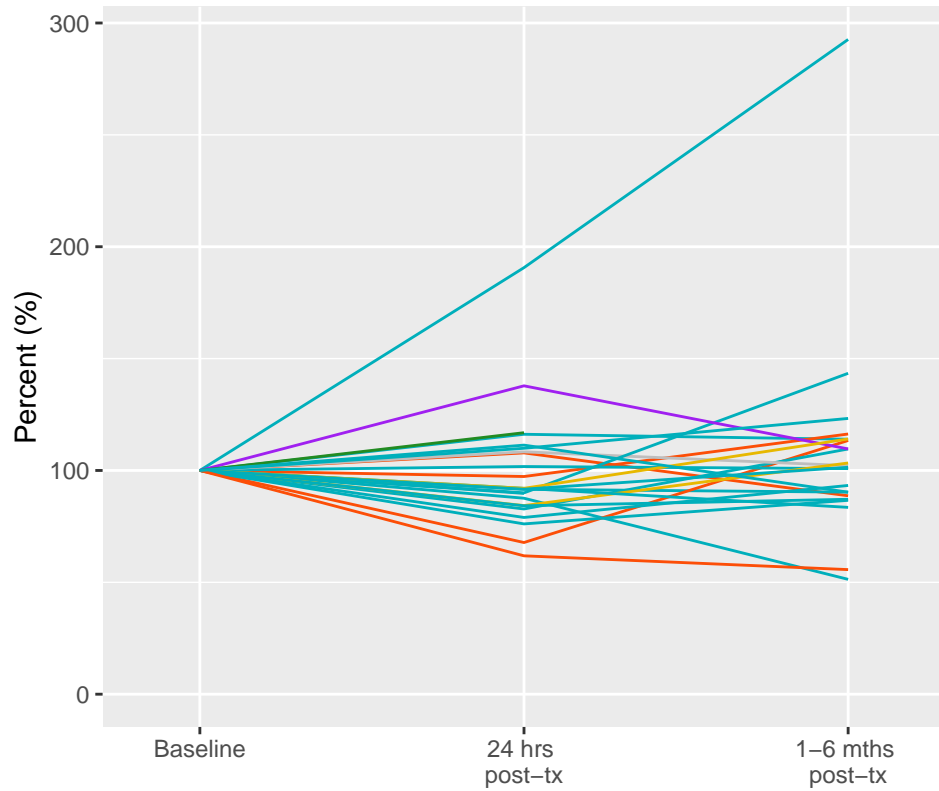

Uniprot ID: P20718, analyte: GZMH

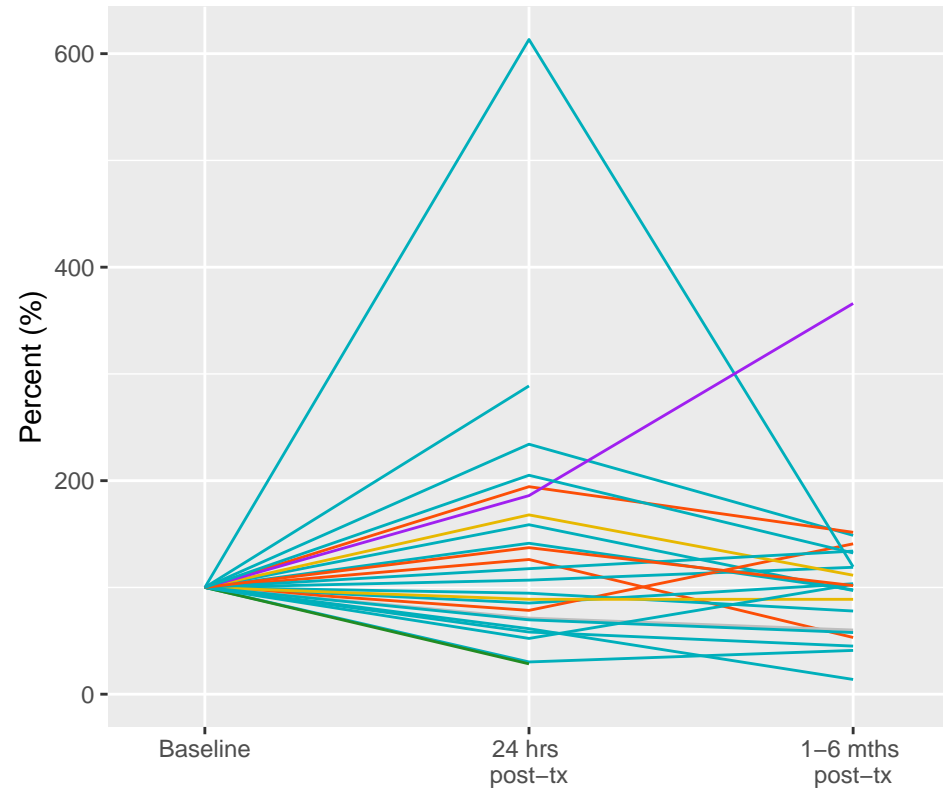

Uniprot ID: P43629, analyte: KIR3DL1

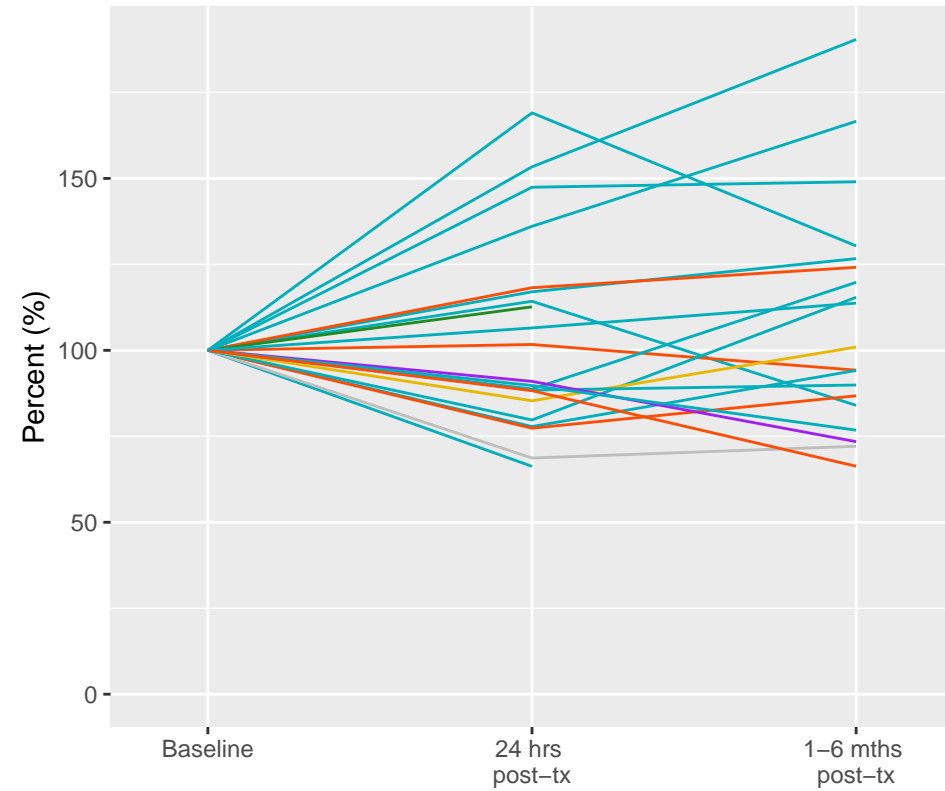

Histology

|             |            |       |           |                   |         |
|-------------|------------|-------|-----------|-------------------|---------|
| Chromophobe | Clear cell | Mixed | Papillary | TFE translocation | Unknown |
|-------------|------------|-------|-----------|-------------------|---------|

Uniprot ID: P01137, analyte: LAP TGF-beta-1

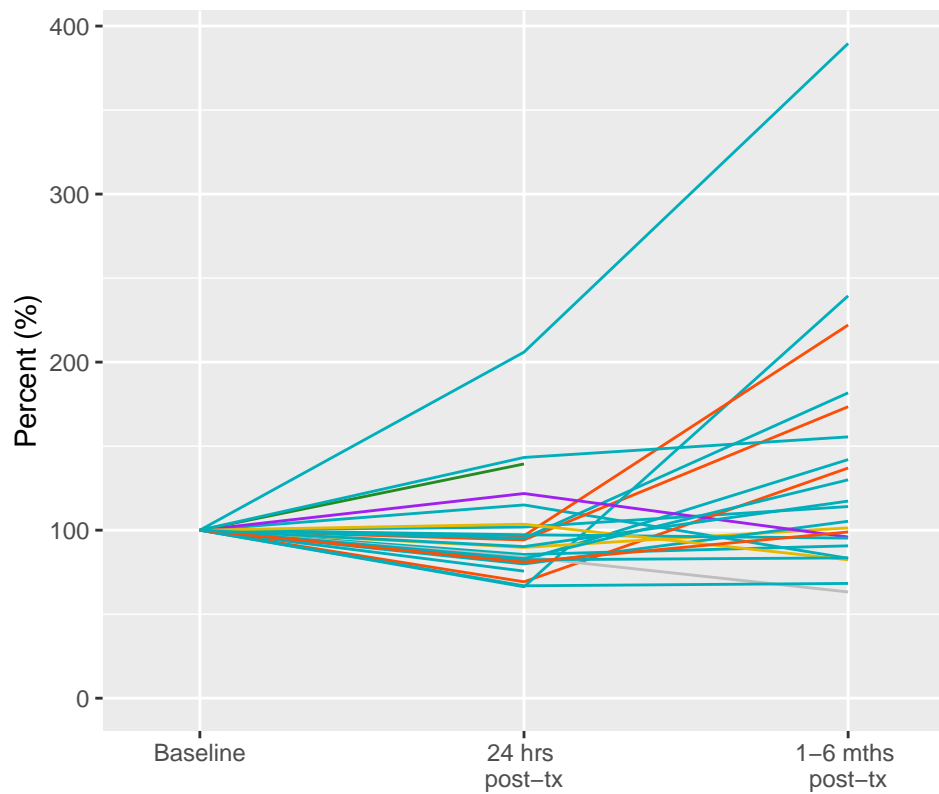

Uniprot ID: P09341, analyte: CXCL1

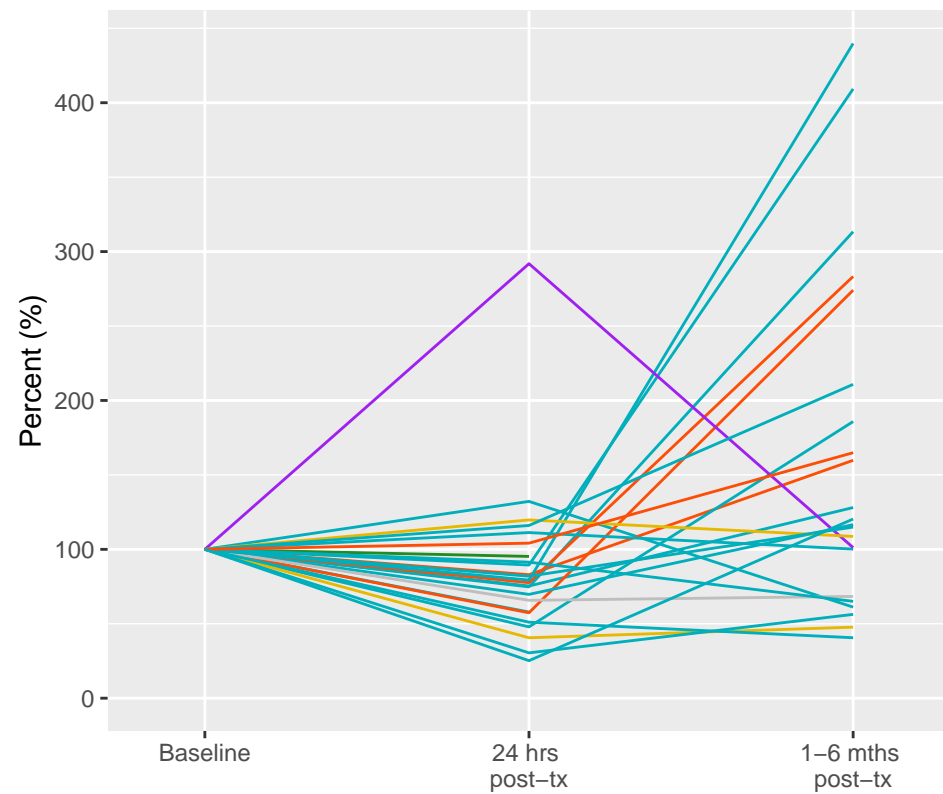

Uniprot ID: O43557, analyte: TNFSF14

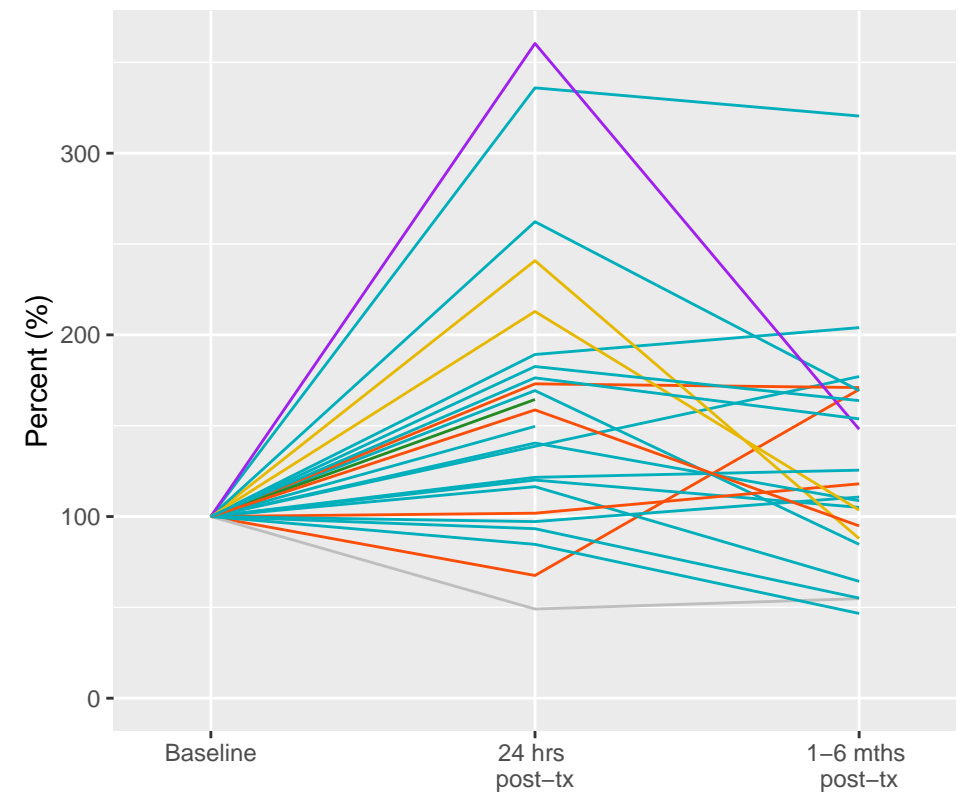

Histology

|             |            |       |           |                   |         |
|-------------|------------|-------|-----------|-------------------|---------|
| Chromophobe | Clear cell | Mixed | Papillary | TFE translocation | Unknown |
|-------------|------------|-------|-----------|-------------------|---------|

Uniprot ID: O95760, analyte: IL33

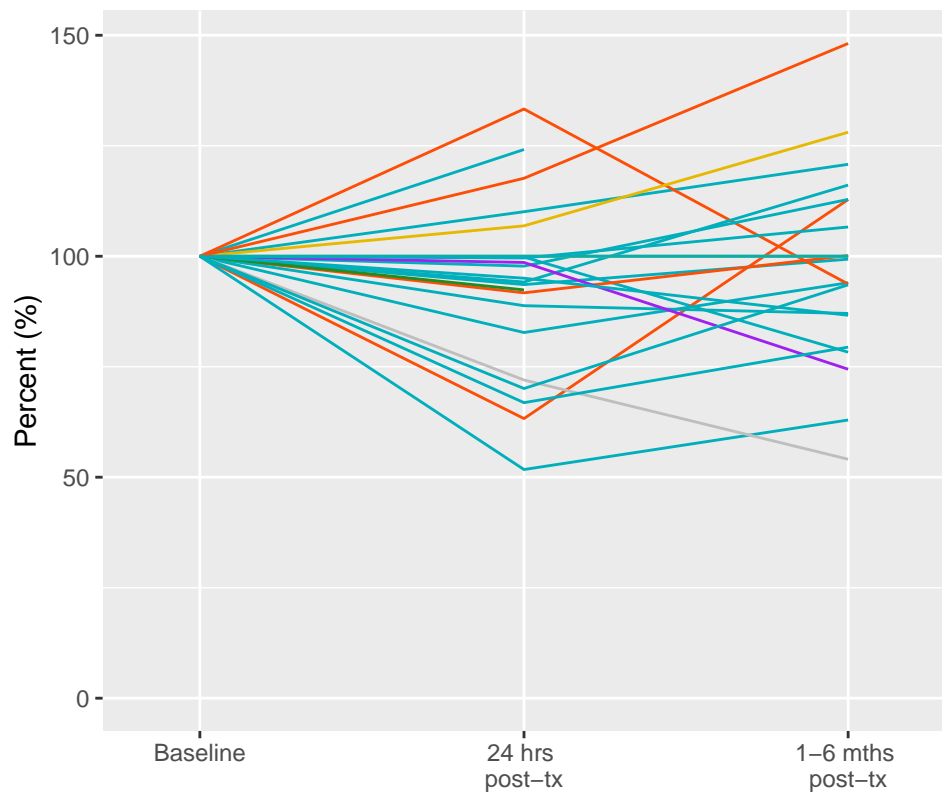

Uniprot ID: O43508, analyte: TWEAK

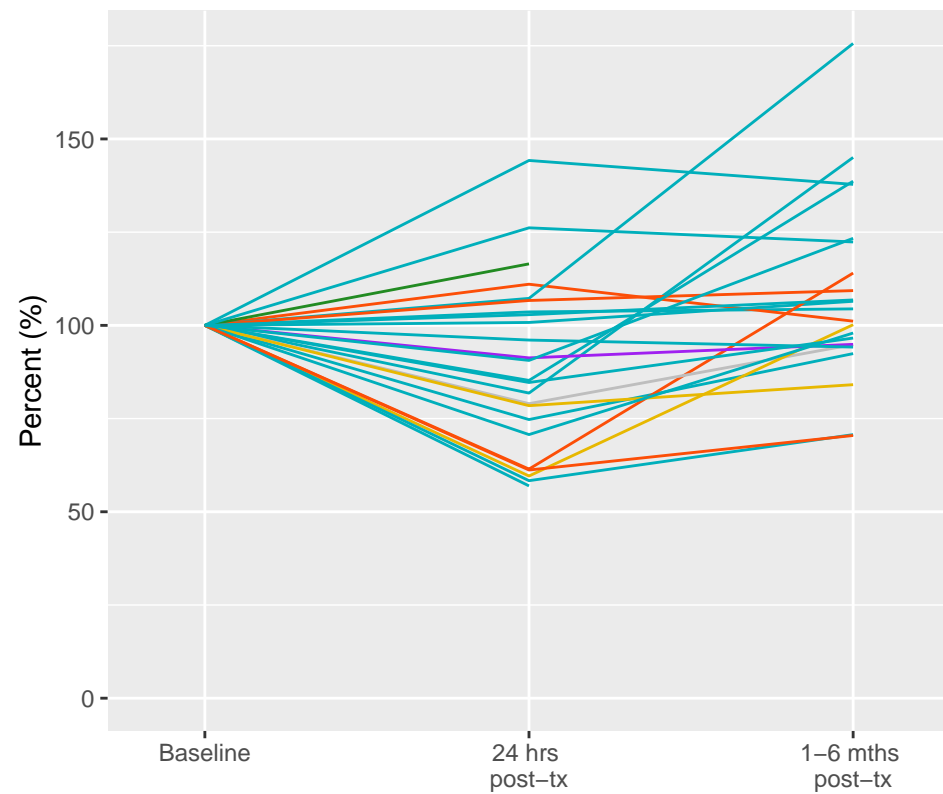

Uniprot ID: P01127, analyte: PDGF subunit B

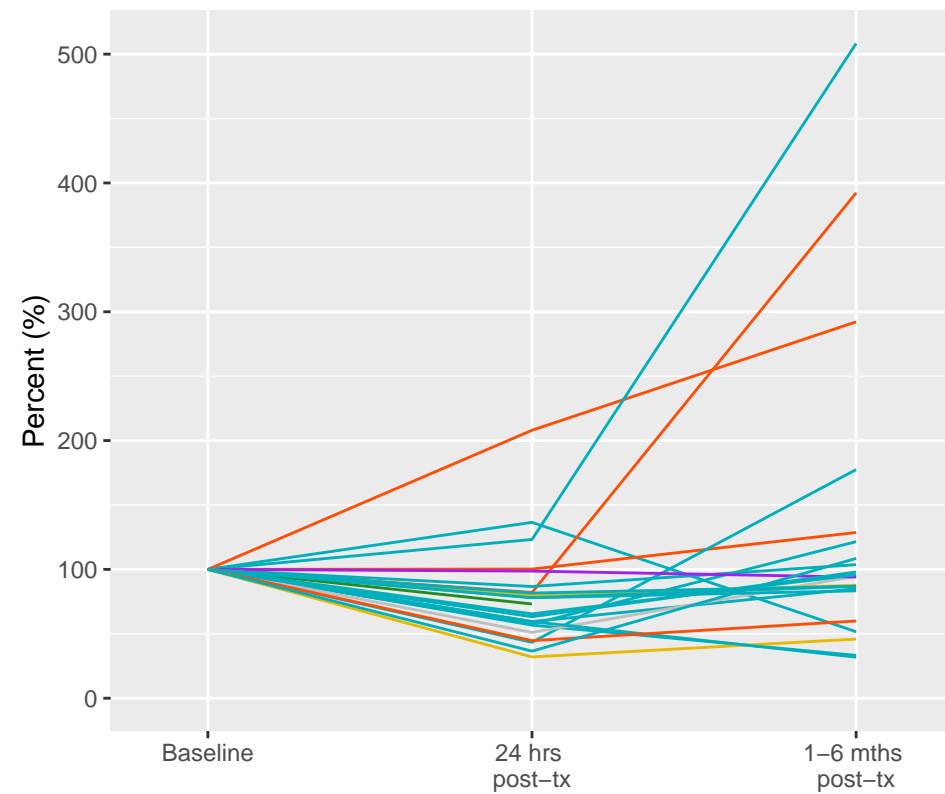

Histology

|             |            |       |           |                   |         |
|-------------|------------|-------|-----------|-------------------|---------|
| Chromophobe | Clear cell | Mixed | Papillary | TFE translocation | Unknown |
|-------------|------------|-------|-----------|-------------------|---------|

Uniprot ID: Q15116, analyte: PDCD1

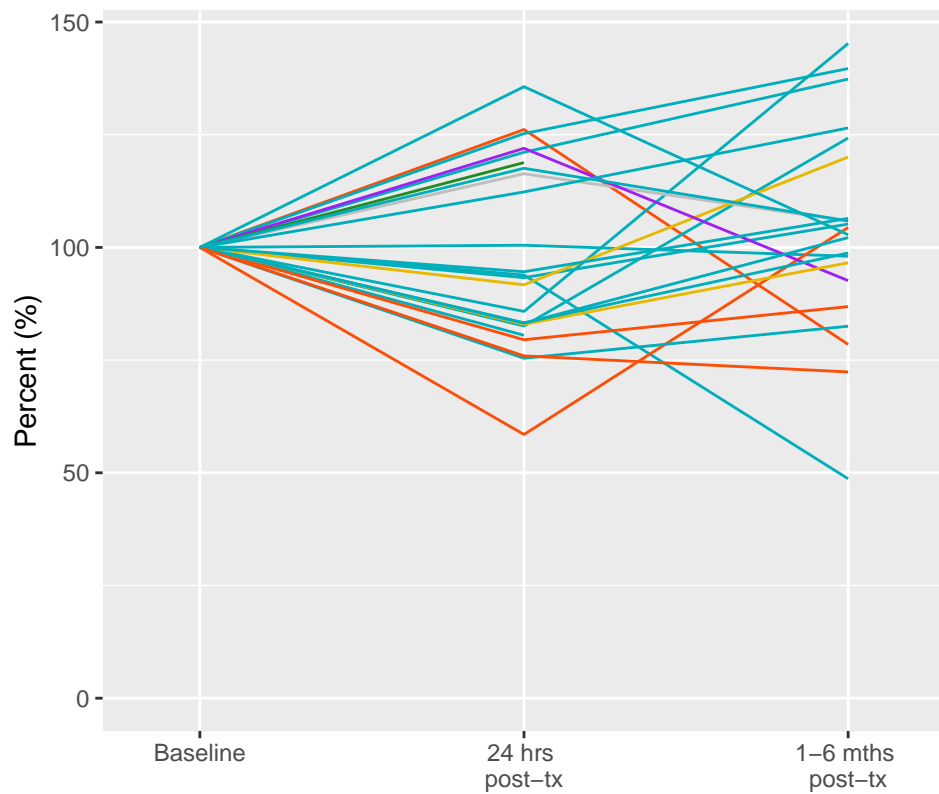

Uniprot ID: P48023, analyte: FASLG

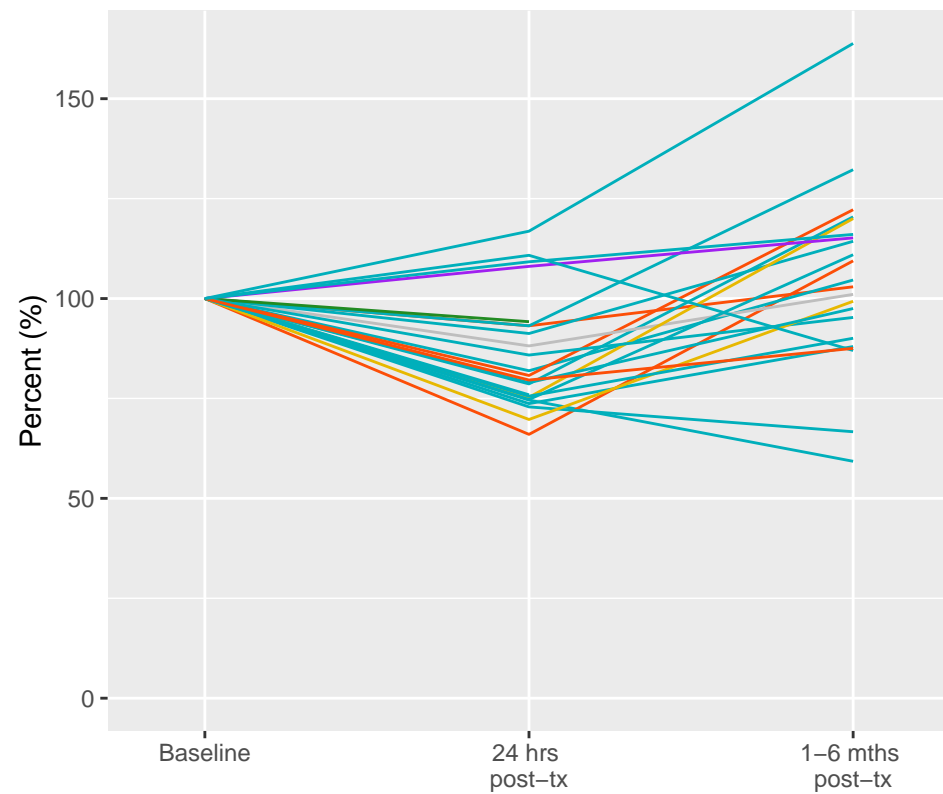

Uniprot ID: P10747, analyte: CD28

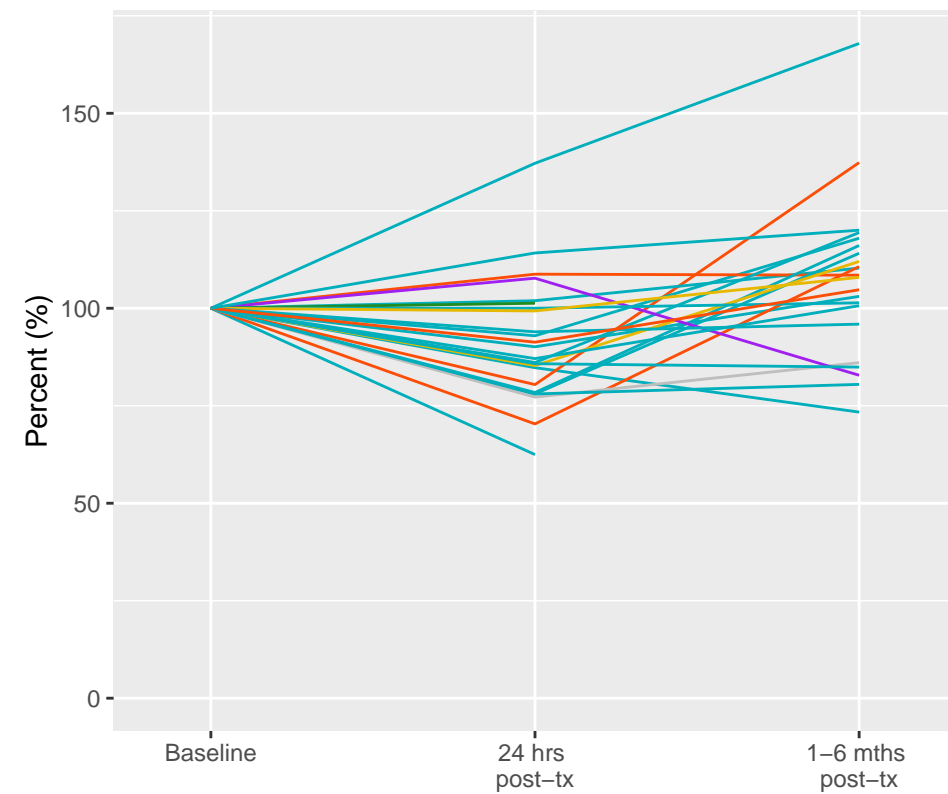

Histology

|             |            |       |           |                   |         |
|-------------|------------|-------|-----------|-------------------|---------|
| Chromophobe | Clear cell | Mixed | Papillary | TFE translocation | Unknown |
|-------------|------------|-------|-----------|-------------------|---------|

Uniprot ID: Q99731, analyte: CCL19

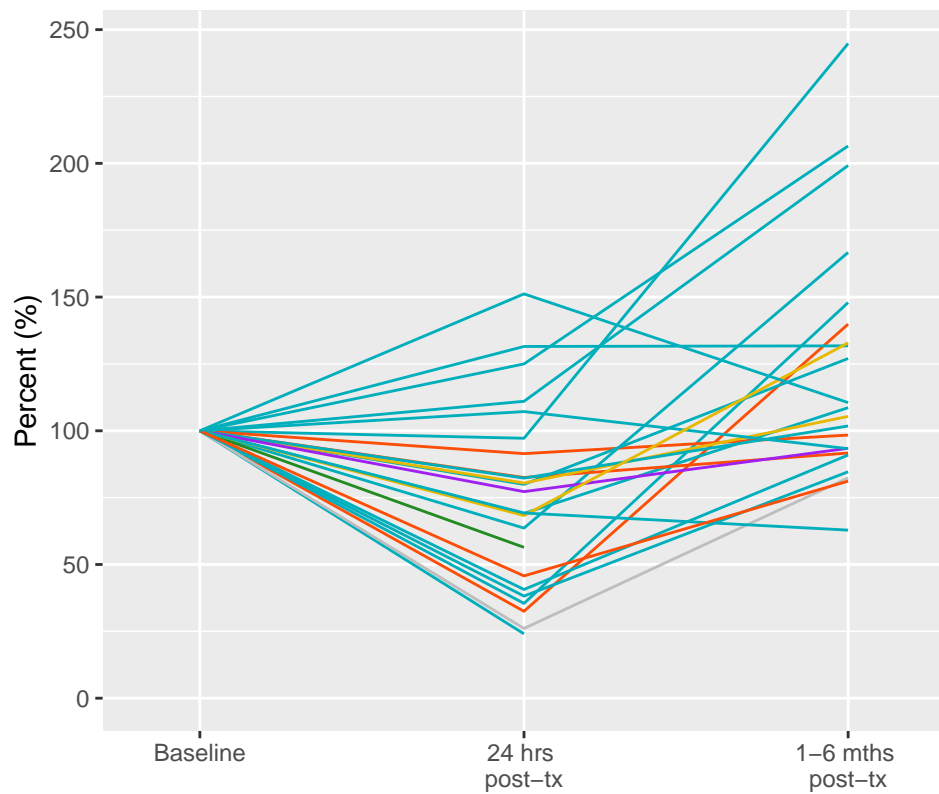

Uniprot ID: P80075, analyte: MCP-2

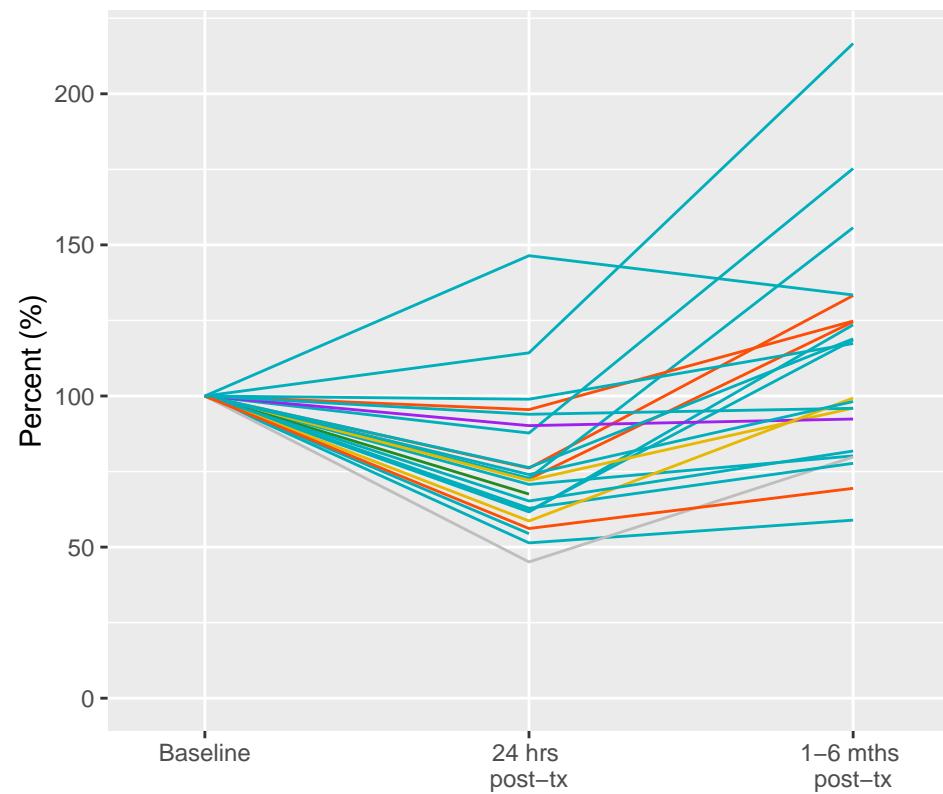

Uniprot ID: P13236, analyte: CCL4

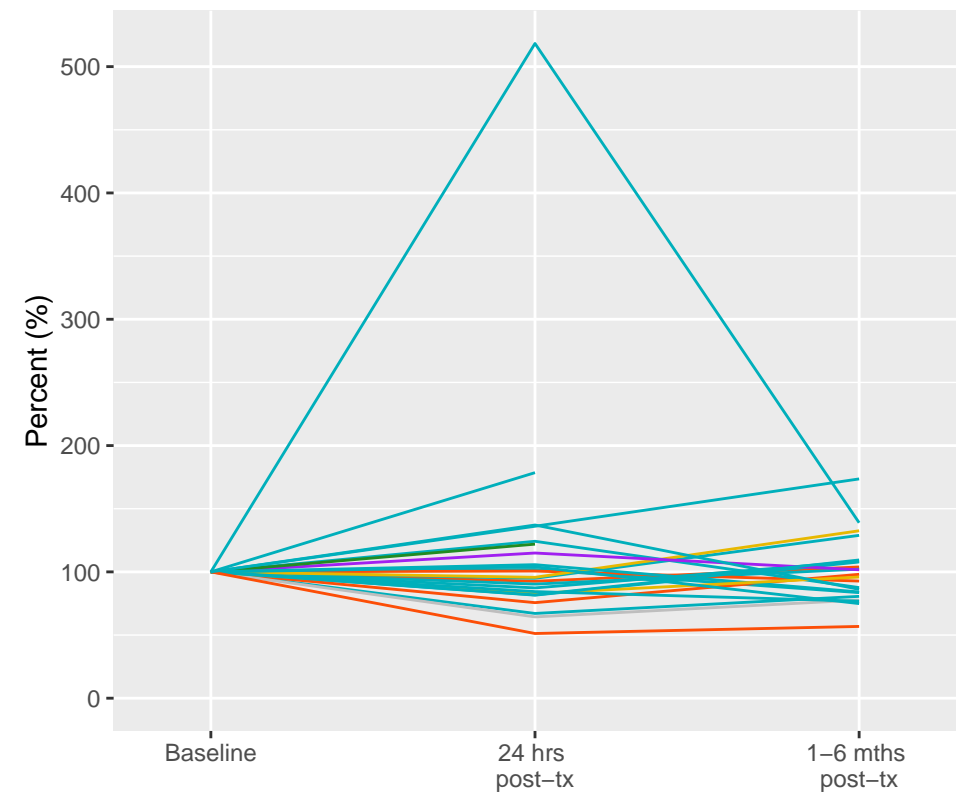

Histology

|             |            |       |           |                   |         |
|-------------|------------|-------|-----------|-------------------|---------|
| Chromophobe | Clear cell | Mixed | Papillary | TFE translocation | Unknown |
|-------------|------------|-------|-----------|-------------------|---------|



Uniprot ID: P40933, analyte: IL15

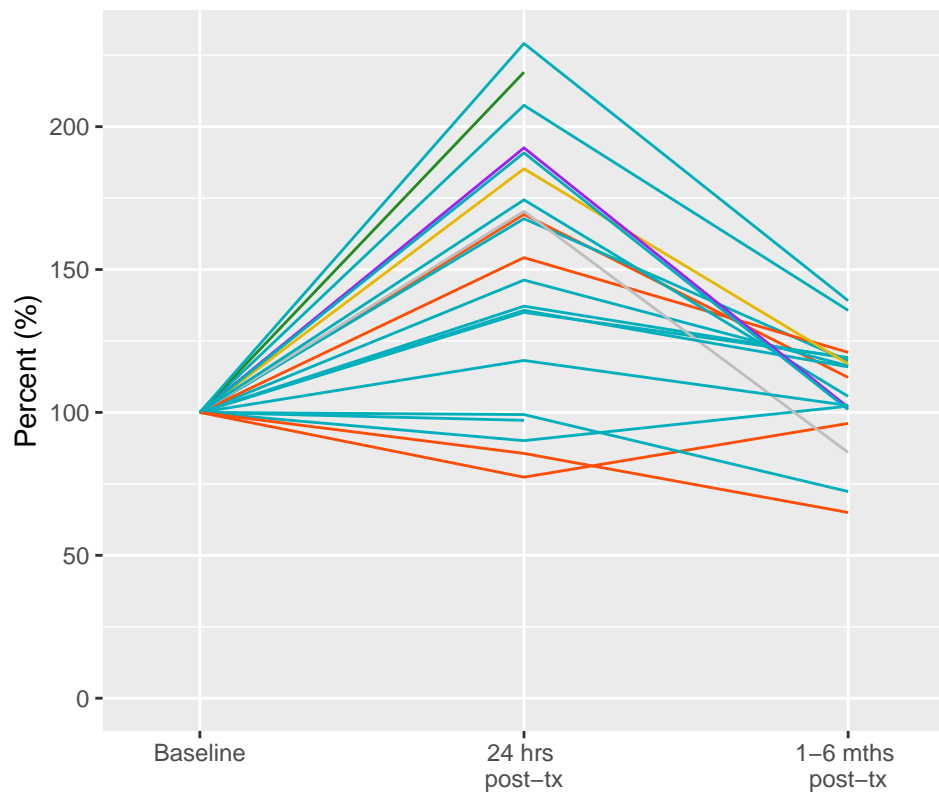

Uniprot ID: P09382, analyte: Gal-1

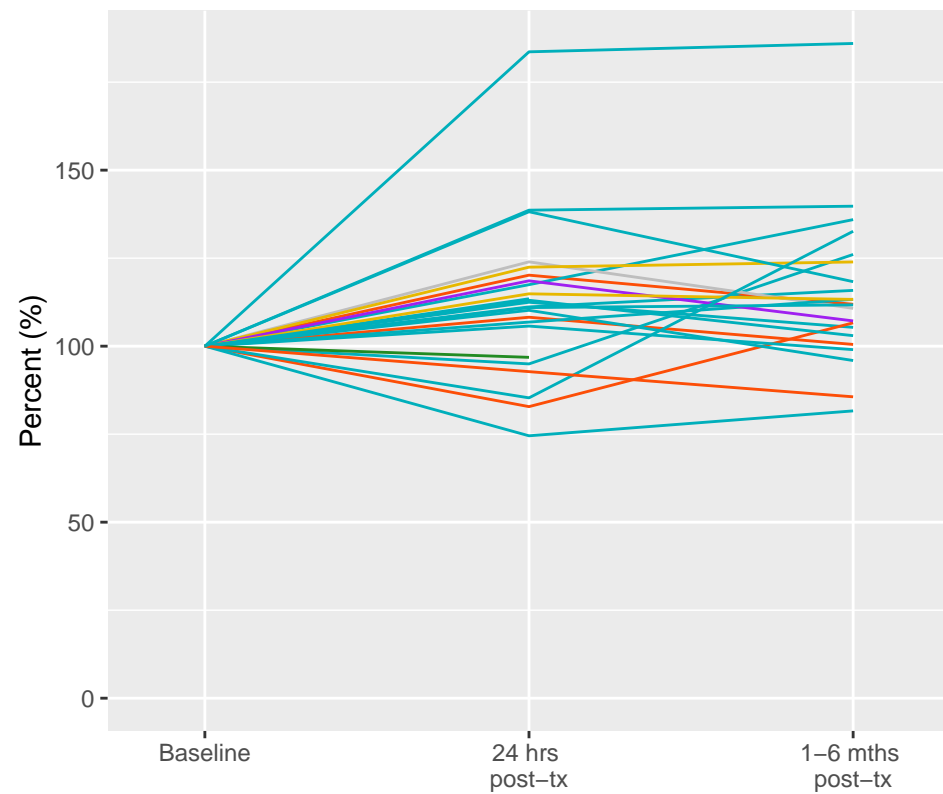

Uniprot ID: Q9NZQ7, analyte: PD-L1

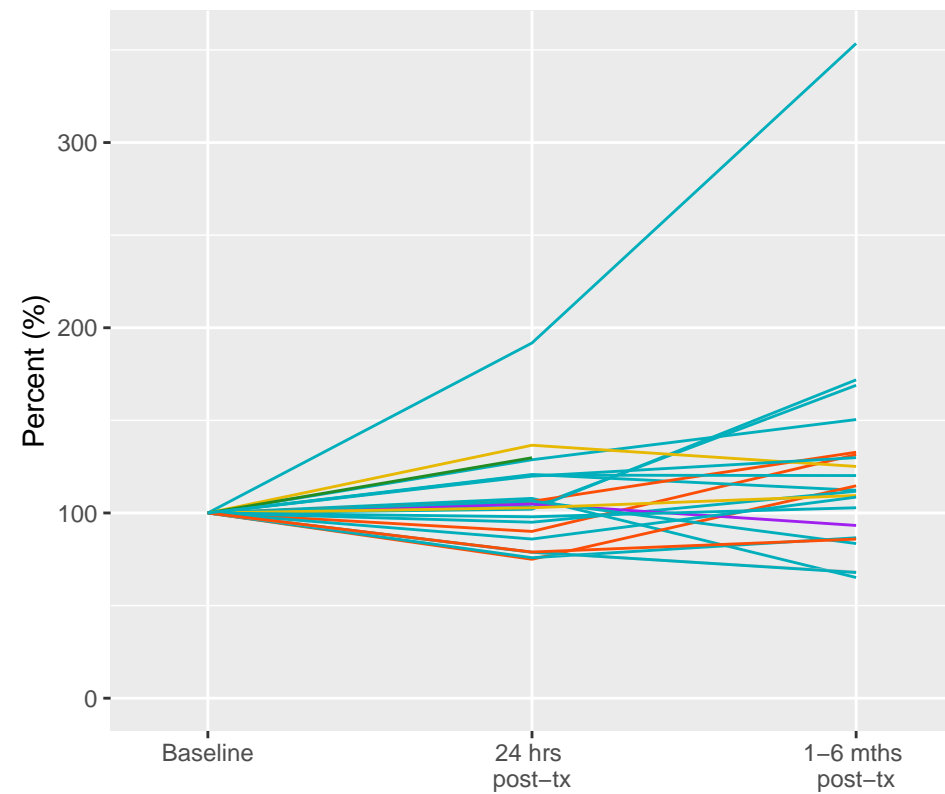

Histology

|             |            |       |           |                   |         |
|-------------|------------|-------|-----------|-------------------|---------|
| Chromophobe | Clear cell | Mixed | Papillary | TFE translocation | Unknown |
|-------------|------------|-------|-----------|-------------------|---------|

Uniprot ID: P26842, analyte: CD27

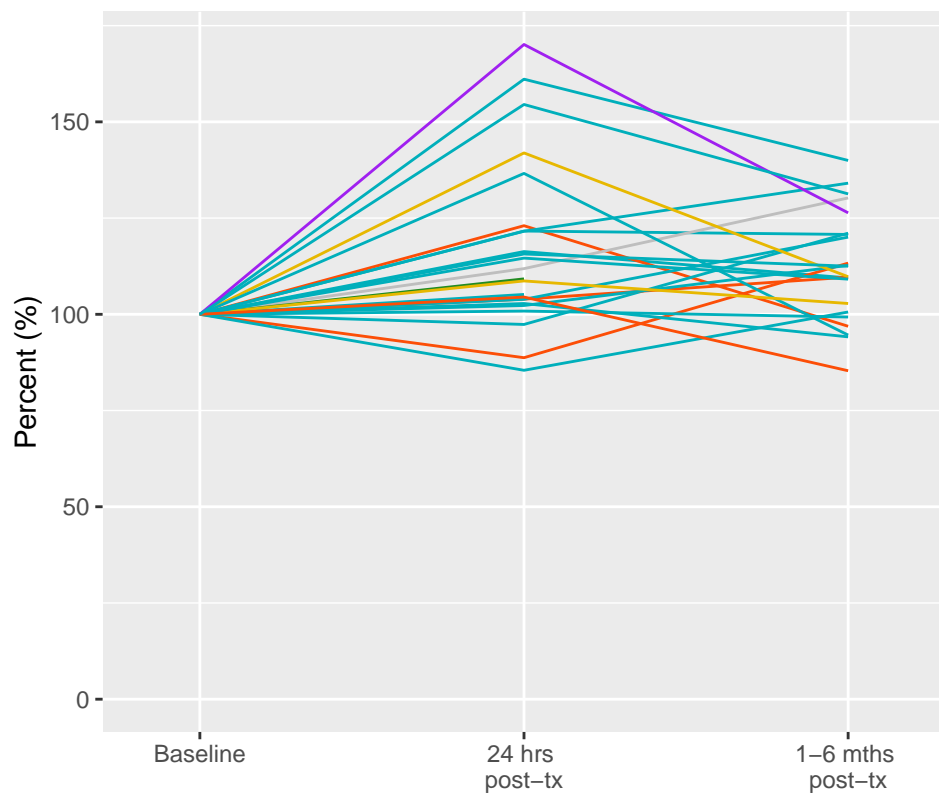

Uniprot ID: P42830, analyte: CXCL5

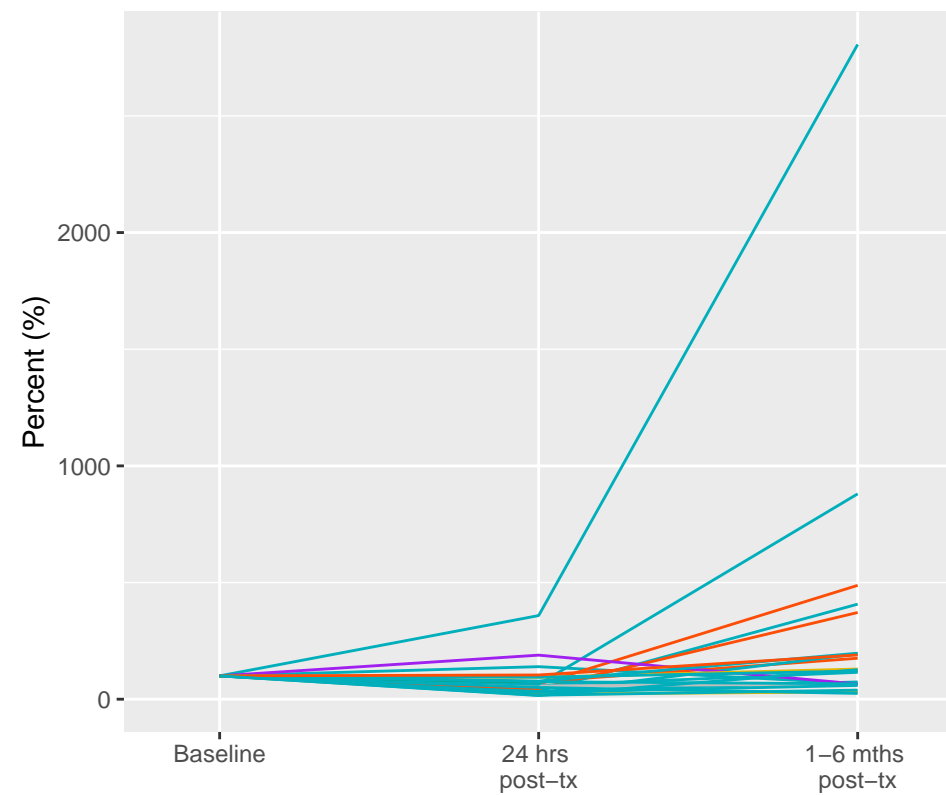

Uniprot ID: P05113, analyte: IL5

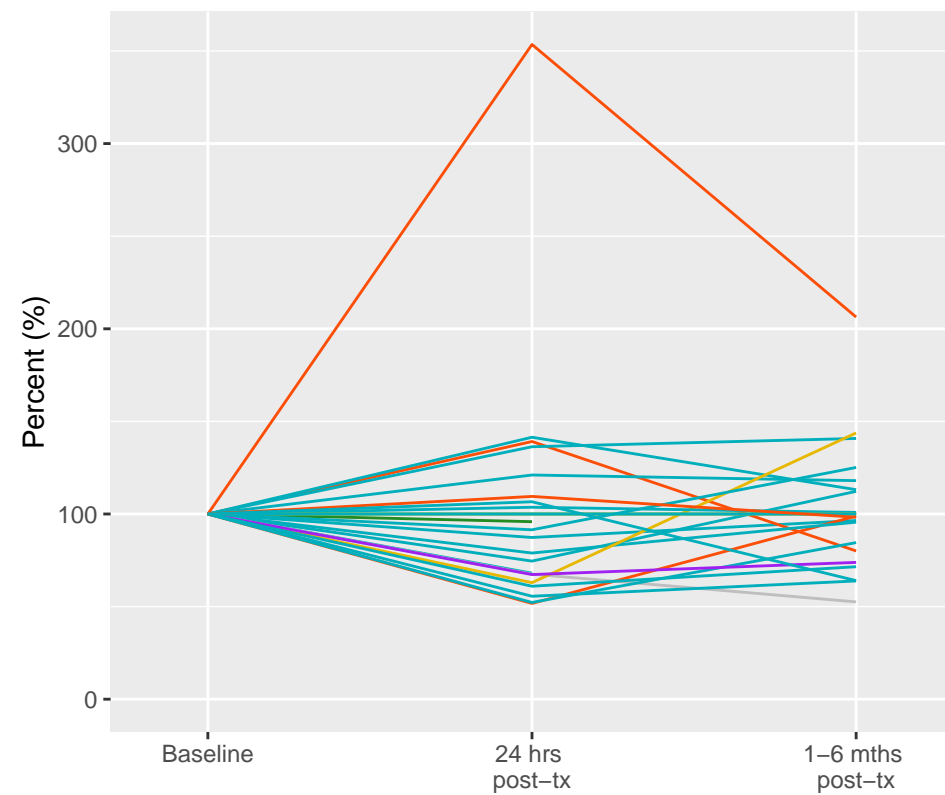

Histology

|             |            |       |           |                   |         |
|-------------|------------|-------|-----------|-------------------|---------|
| Chromophobe | Clear cell | Mixed | Papillary | TFE translocation | Unknown |
|-------------|------------|-------|-----------|-------------------|---------|

Uniprot ID: P14210, analyte: HGF

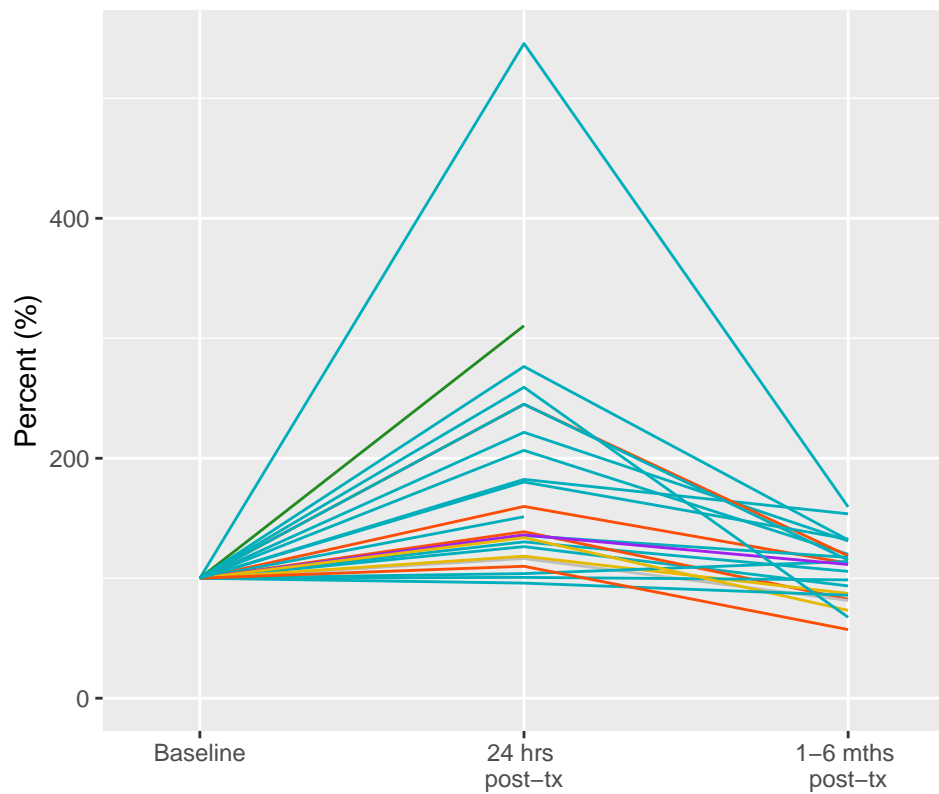

Uniprot ID: P12544, analyte: GZMA

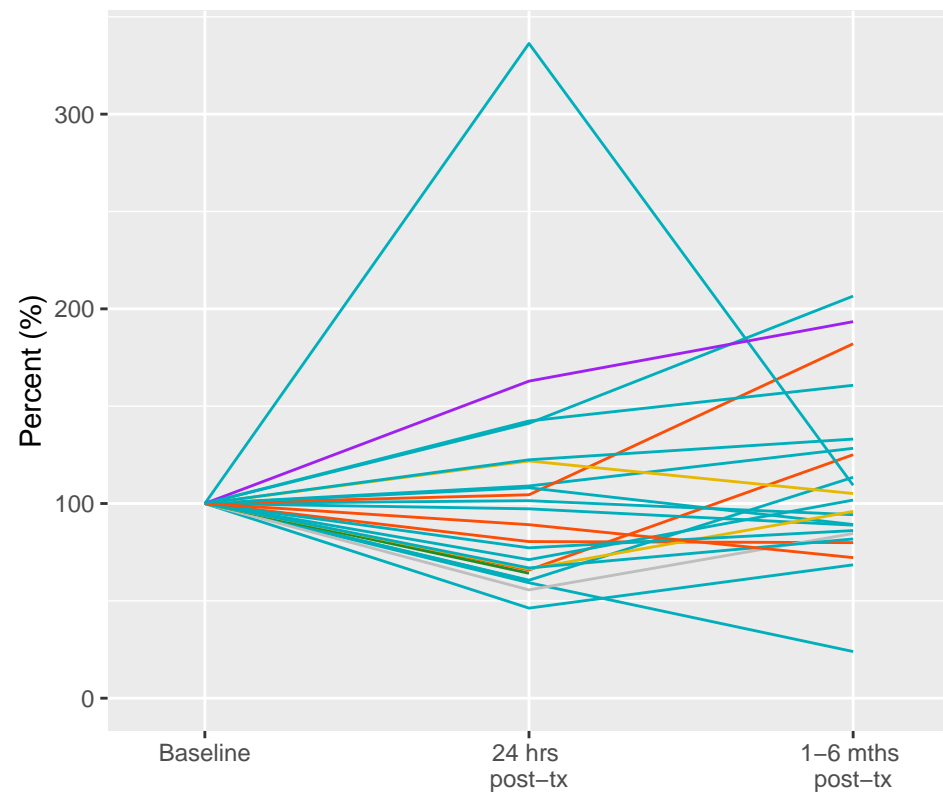

Uniprot ID: P09601, analyte: HO-1

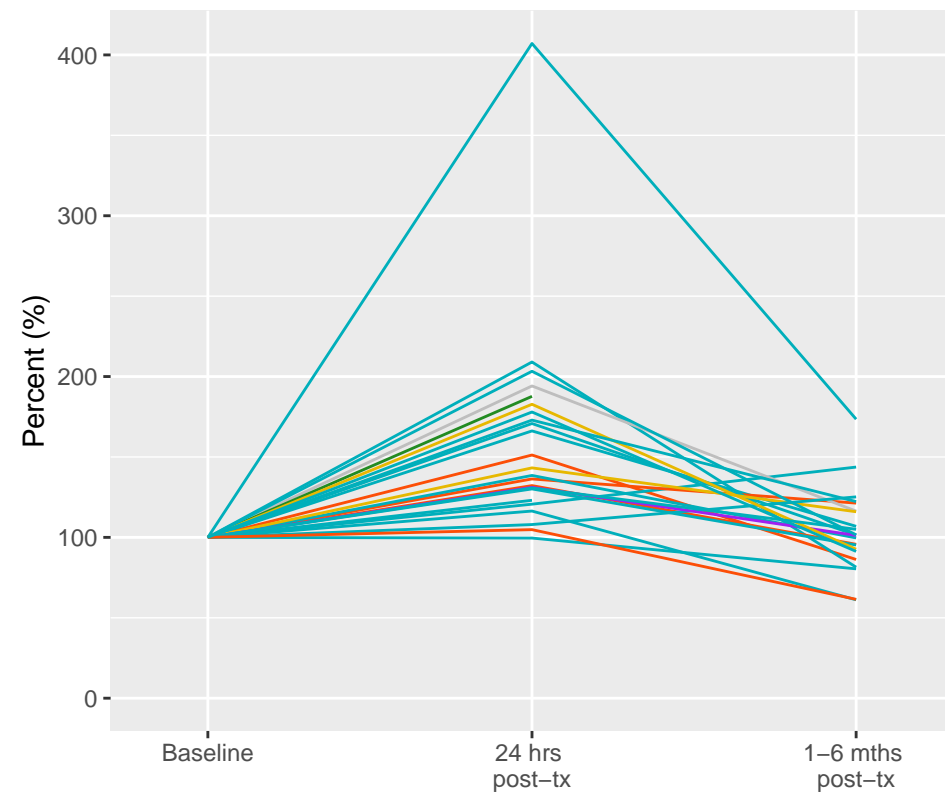

Histology

|             |            |       |           |                   |         |
|-------------|------------|-------|-----------|-------------------|---------|
| Chromophobe | Clear cell | Mixed | Papillary | TFE translocation | Unknown |
|-------------|------------|-------|-----------|-------------------|---------|

Uniprot ID: P78423, analyte: CX3CL1

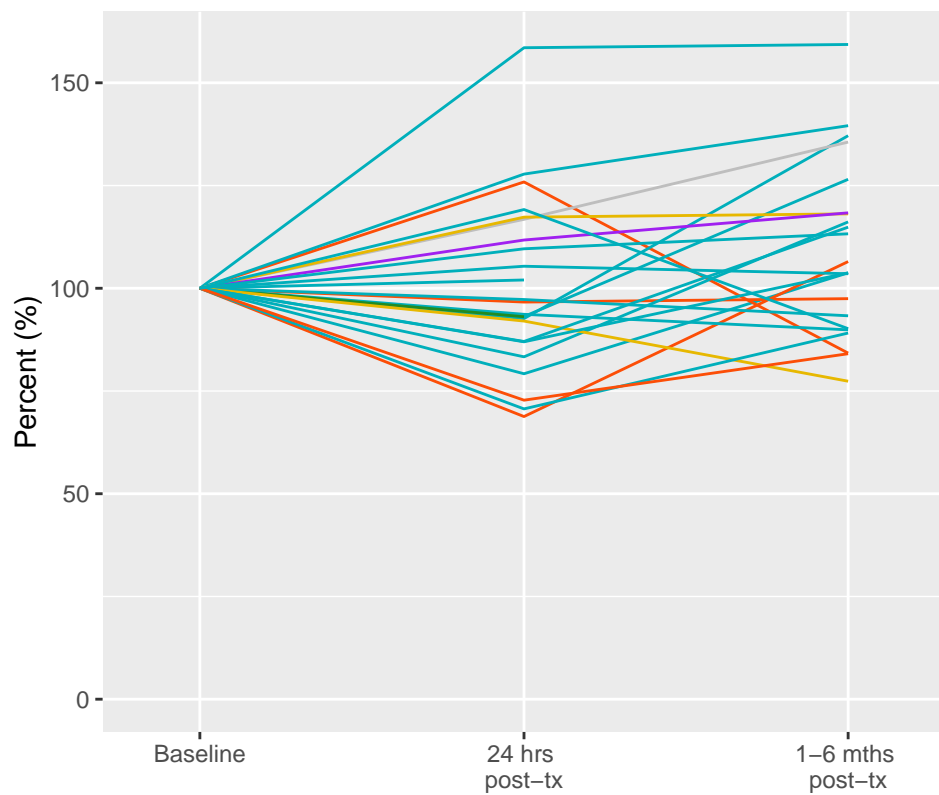

Uniprot ID: P02778, analyte: CXCL10

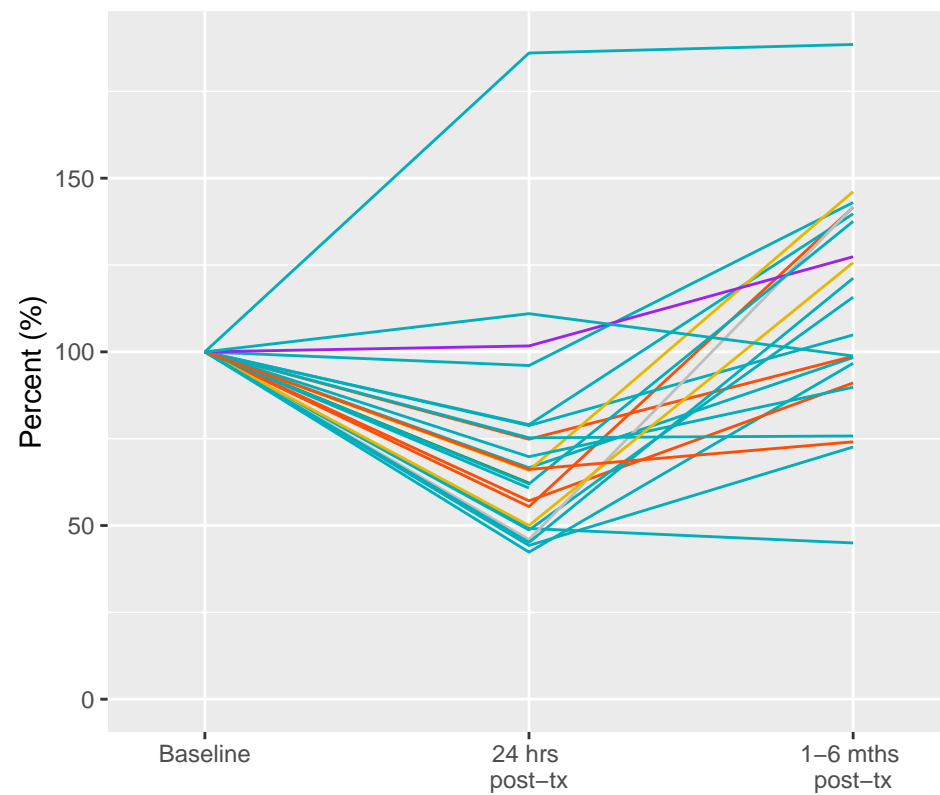

Uniprot ID: P32970, analyte: CD70

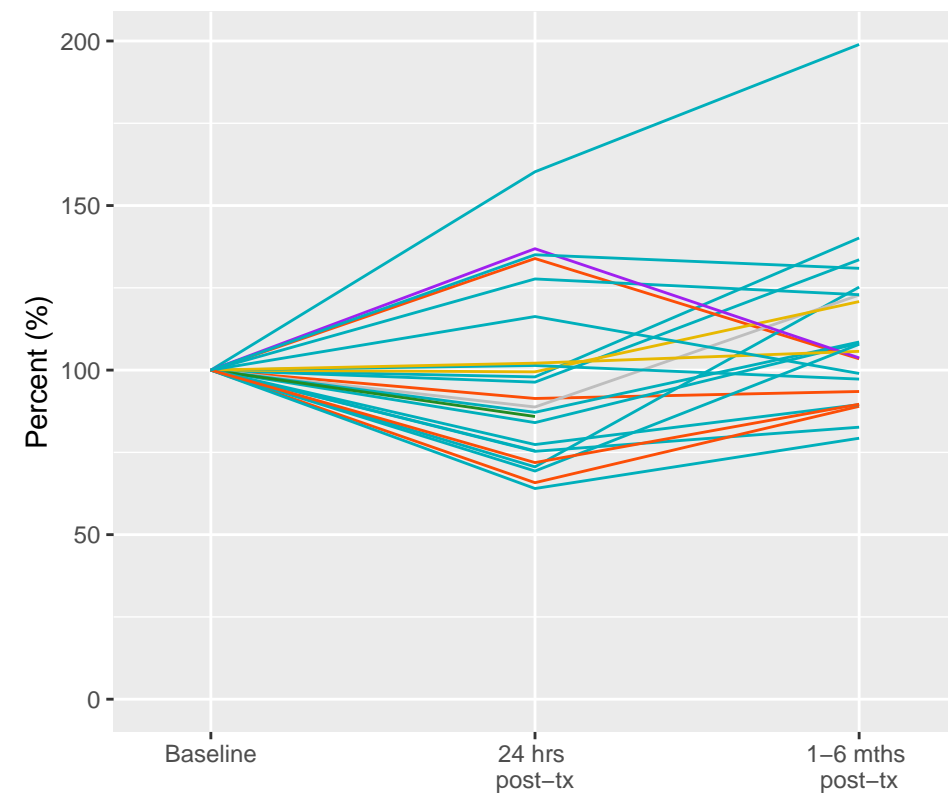

Histology

|             |            |       |           |                   |         |
|-------------|------------|-------|-----------|-------------------|---------|
| Chromophobe | Clear cell | Mixed | Papillary | TFE translocation | Unknown |
|-------------|------------|-------|-----------|-------------------|---------|

Uniprot ID: P22301, analyte: IL10

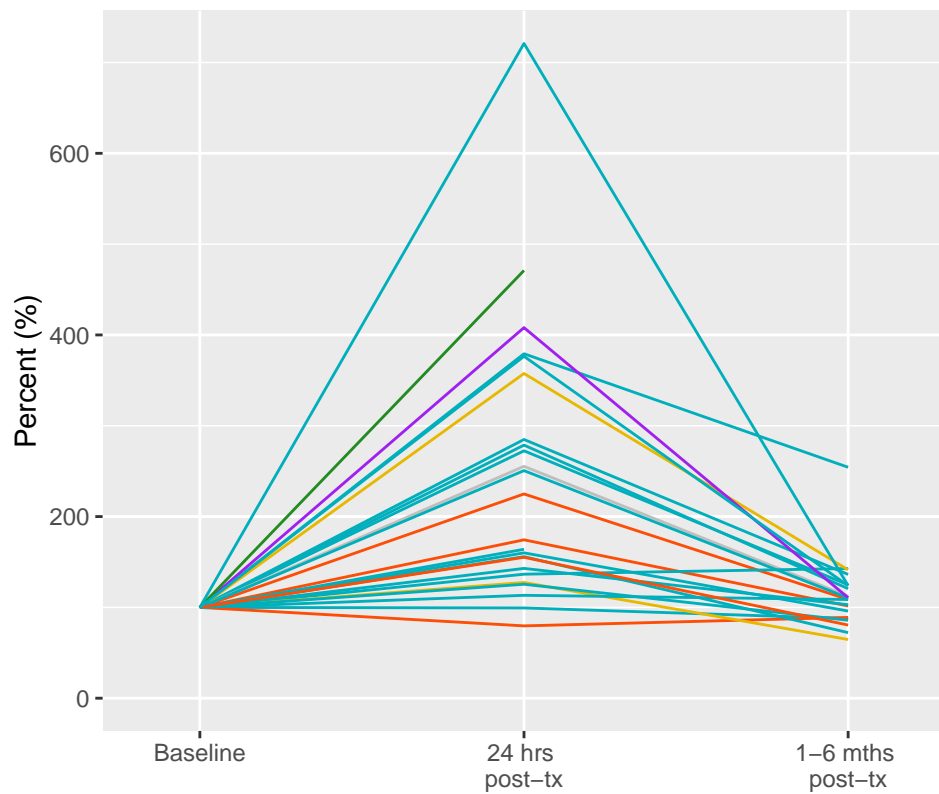

Uniprot ID: Q9NP84, analyte: TNFRSF12A

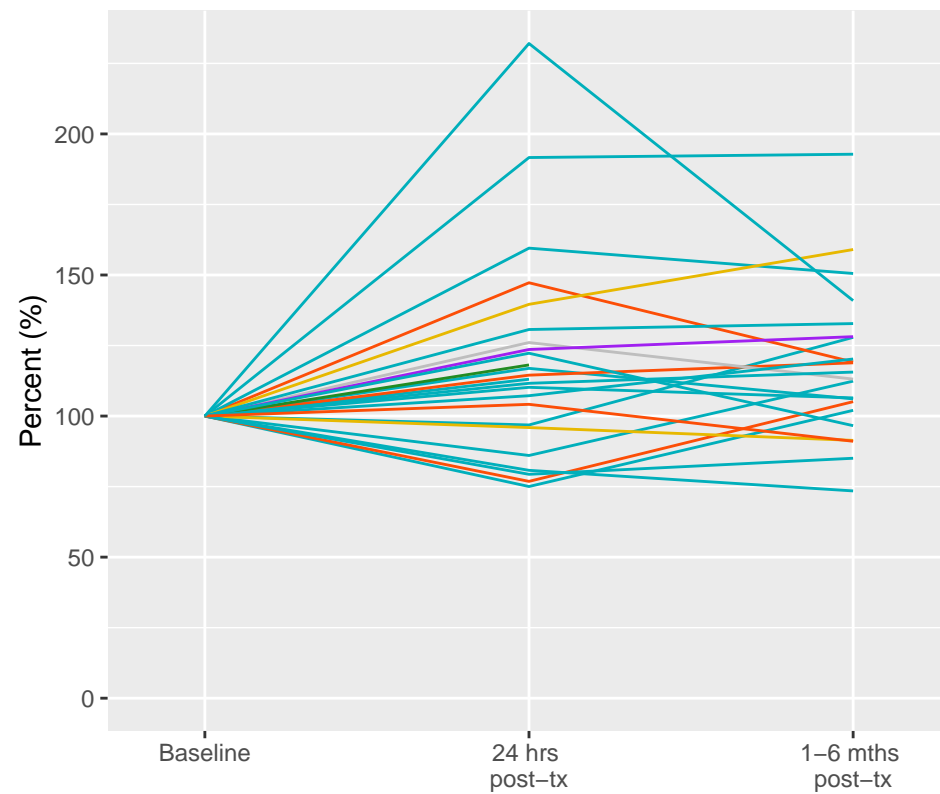

Uniprot ID: P55773, analyte: CCL23

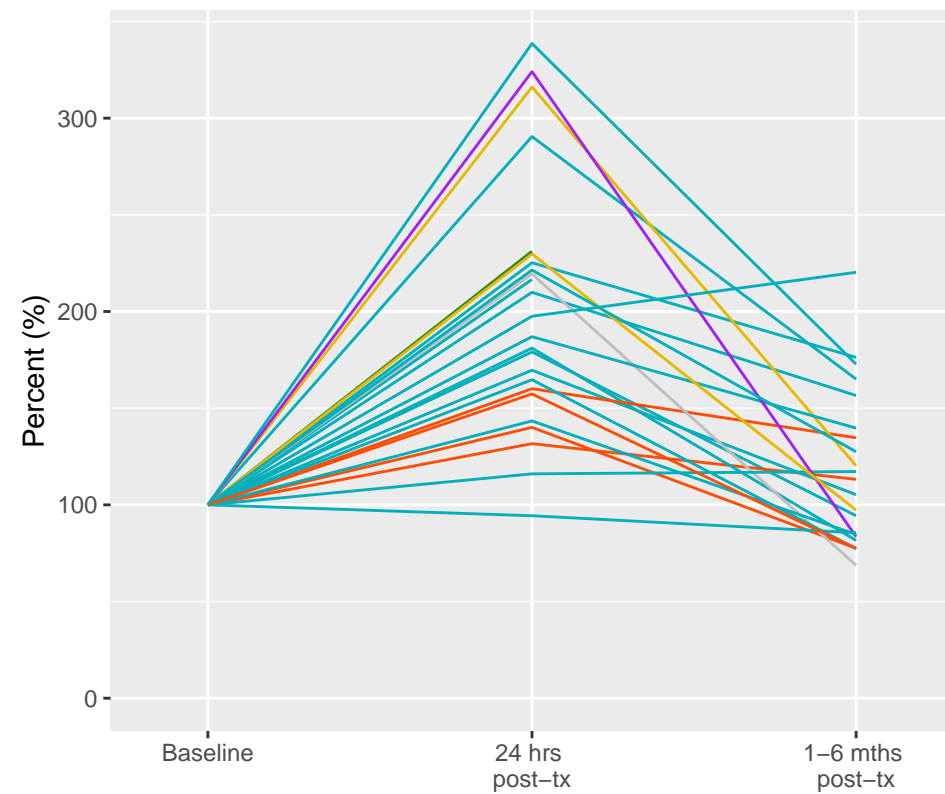

Histology

|             |            |       |           |                   |         |
|-------------|------------|-------|-----------|-------------------|---------|
| Chromophobe | Clear cell | Mixed | Papillary | TFE translocation | Unknown |
|-------------|------------|-------|-----------|-------------------|---------|

Uniprot ID: P06127, analyte: CD5

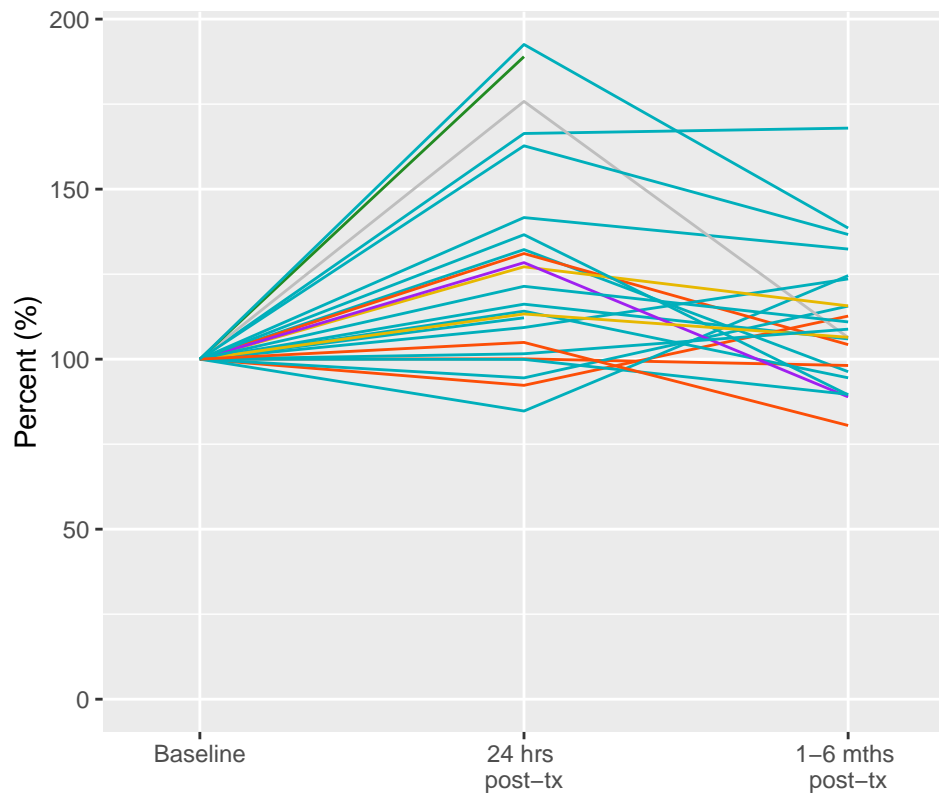

Uniprot ID: P10147, analyte: CCL3

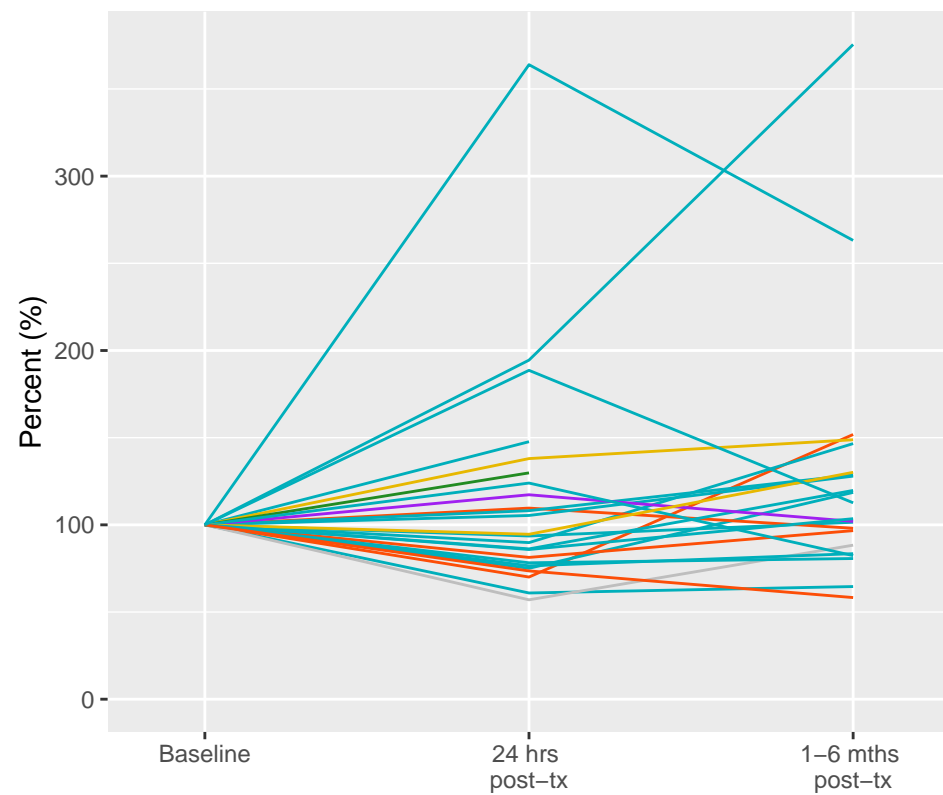

Uniprot ID: P09237, analyte: MMP7

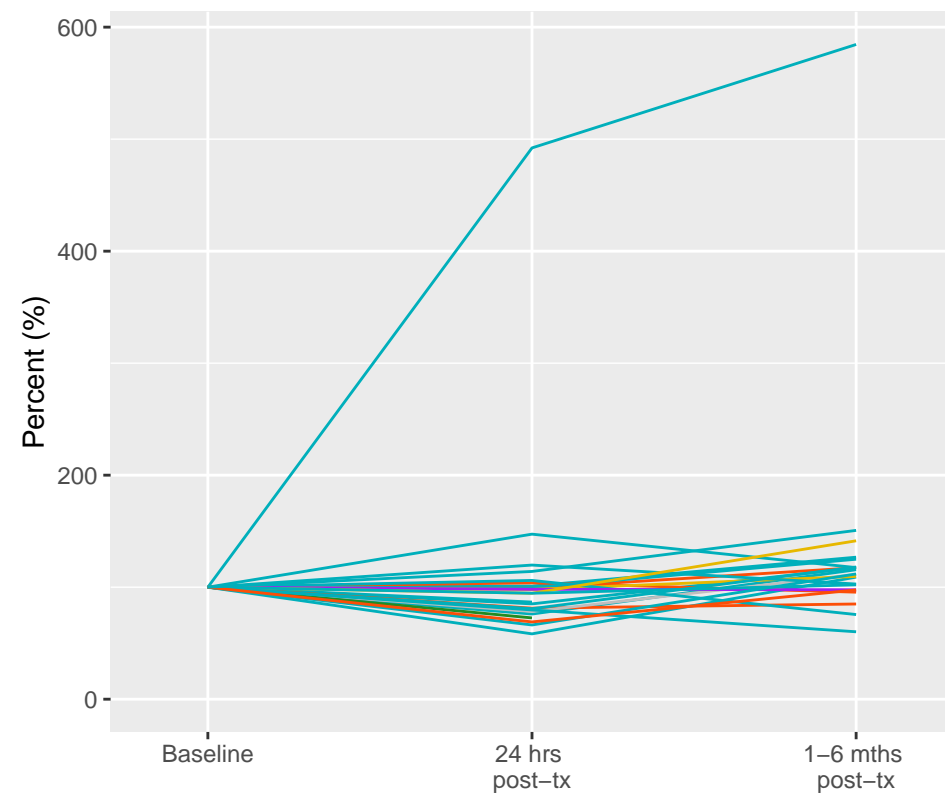

Histology

Chromophobe

Clear cell

Mixed

Papillary

TFE translocation

Unknown

Uniprot ID: P05089, analyte: ARG1

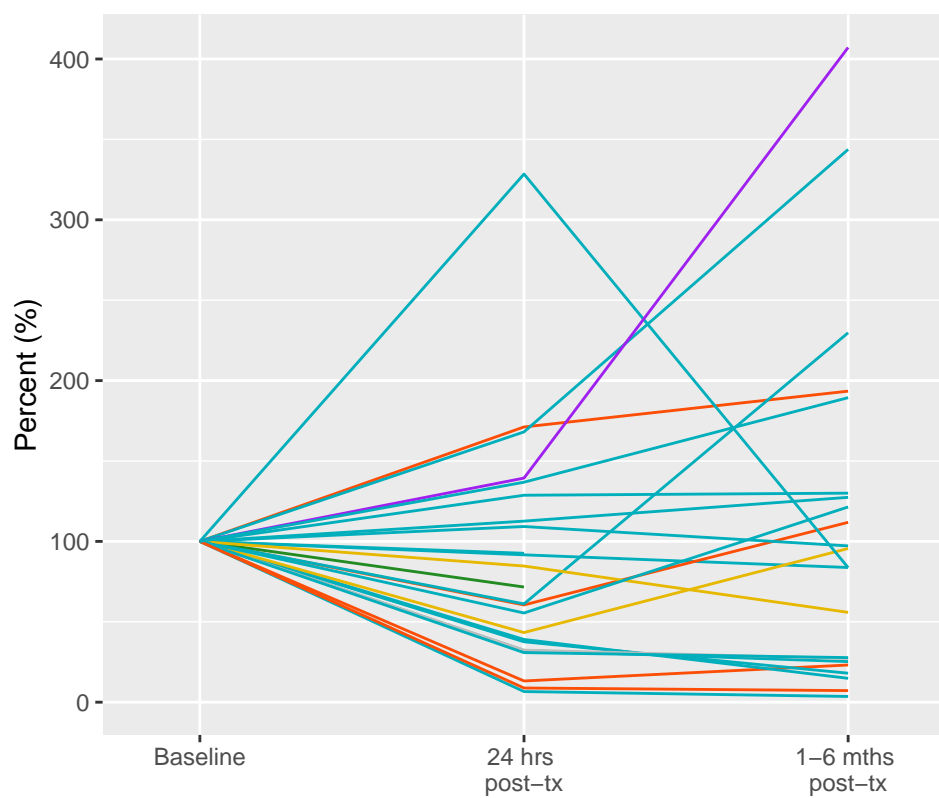

Uniprot ID: O76036, analyte: NCR1

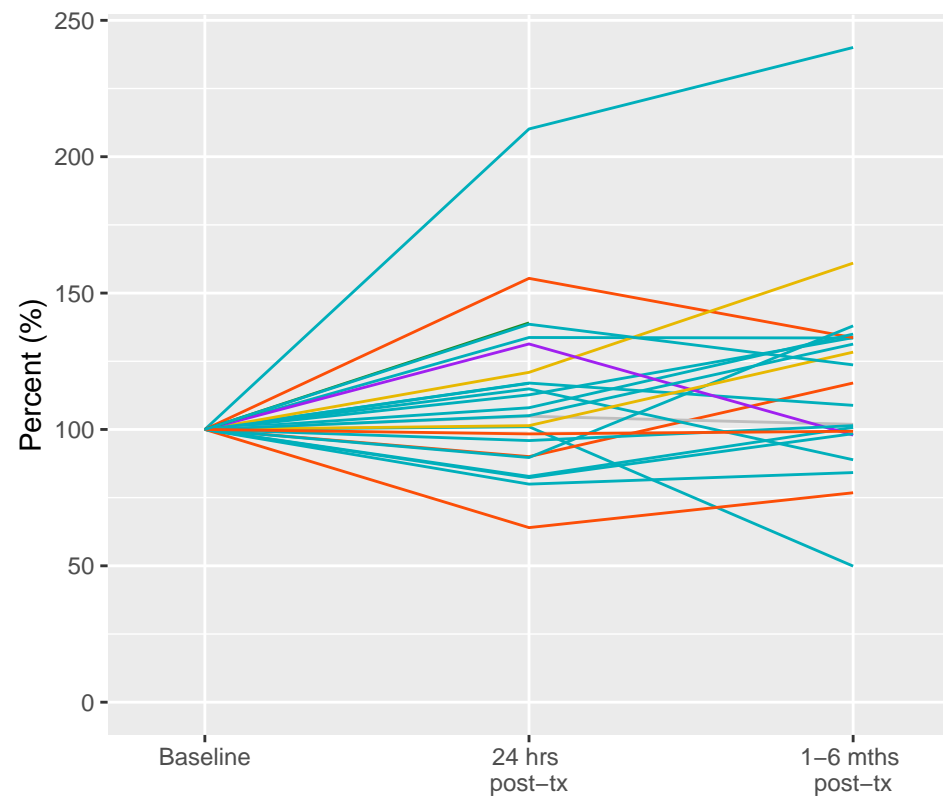

Uniprot ID: P07585, analyte: DCN

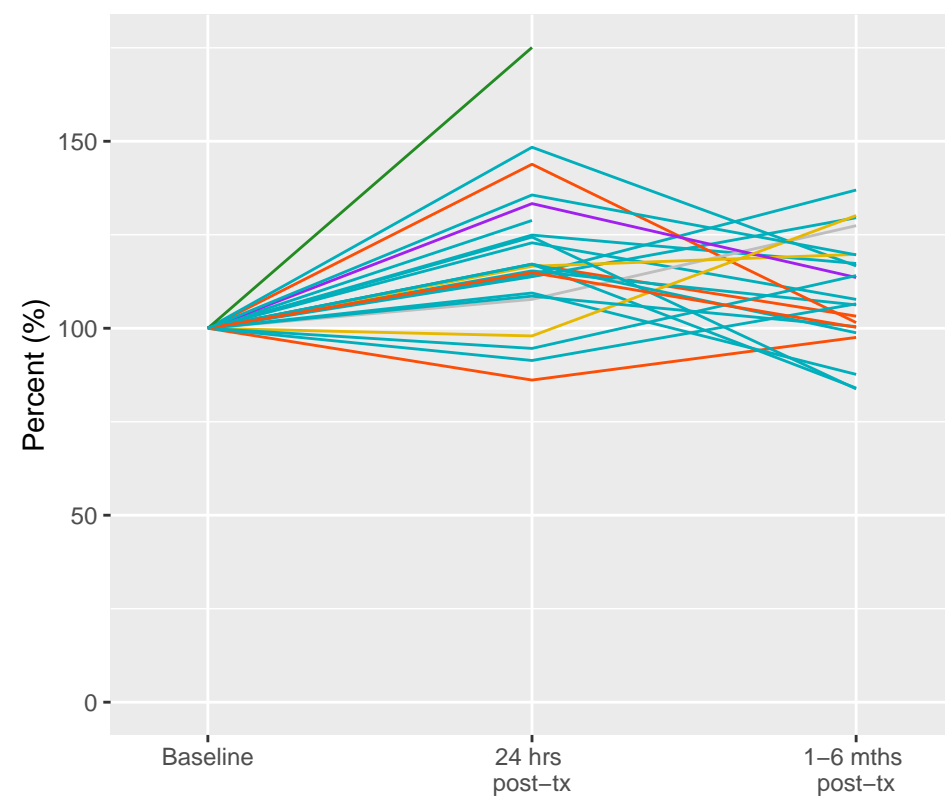

Histology

|             |            |       |           |                   |         |
|-------------|------------|-------|-----------|-------------------|---------|
| Chromophobe | Clear cell | Mixed | Papillary | TFE translocation | Unknown |
|-------------|------------|-------|-----------|-------------------|---------|

Uniprot ID: O75509, analyte: TNFRSF21

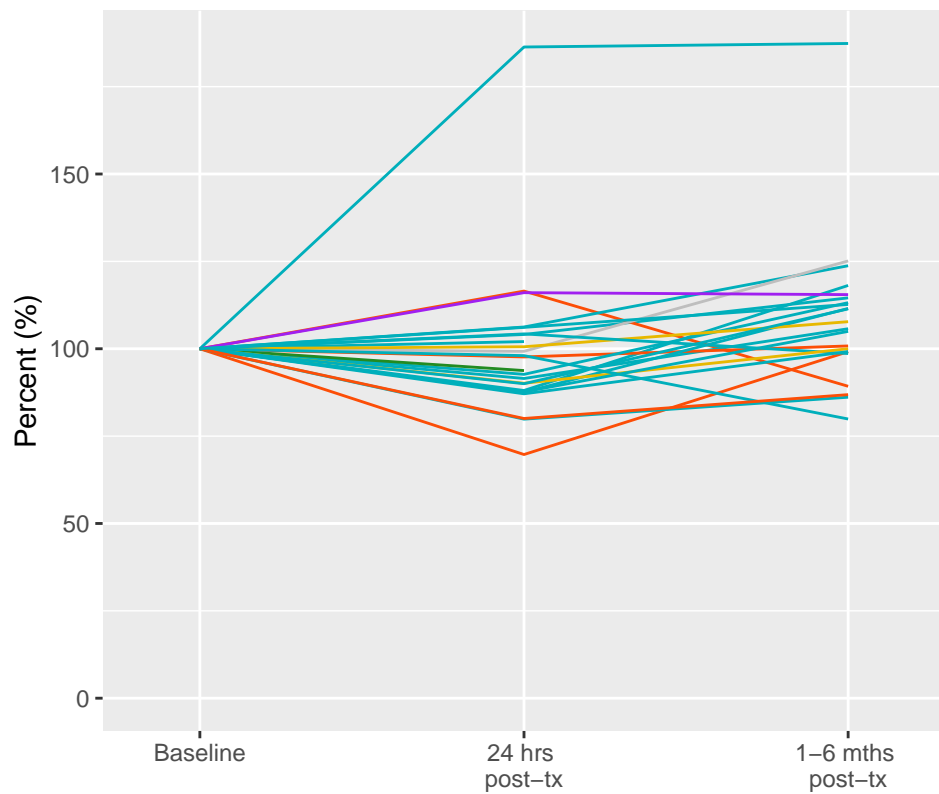

Uniprot ID: P43489, analyte: TNFRSF4

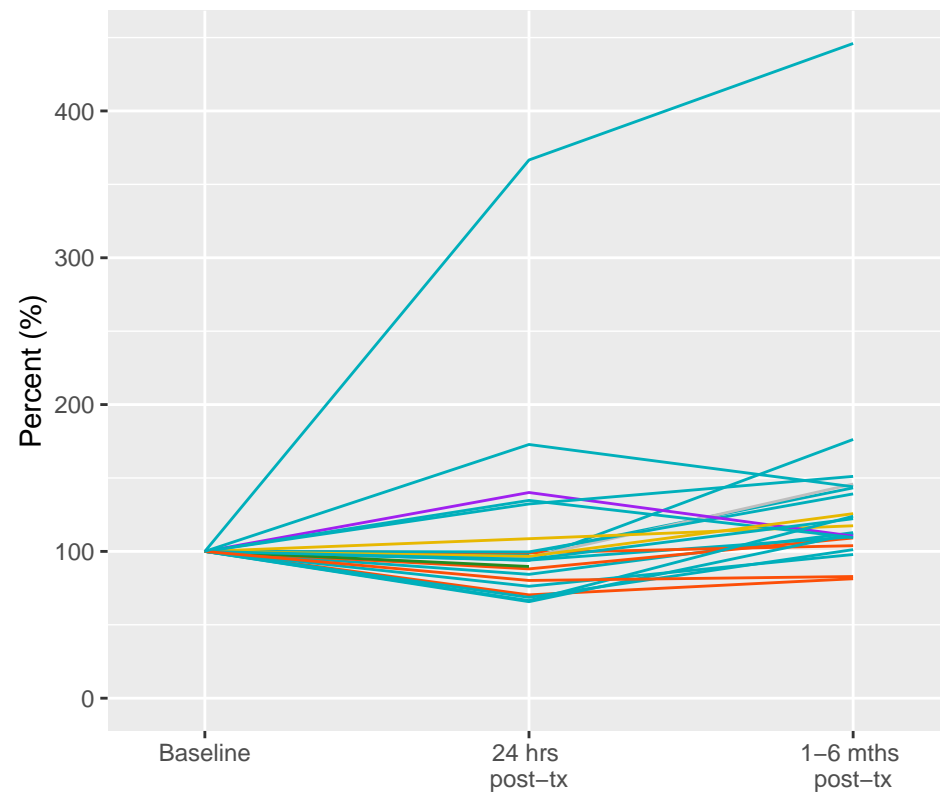

Uniprot ID: Q29983.Q29980, analyte: MIC-A/B

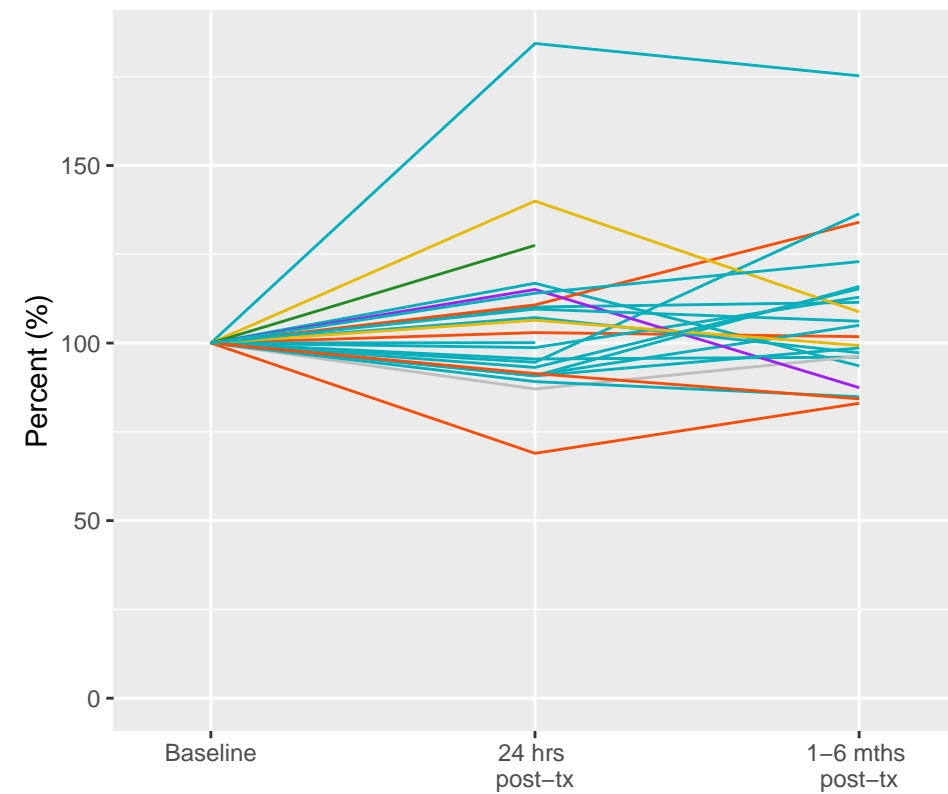

Histology

|             |            |       |           |                   |         |
|-------------|------------|-------|-----------|-------------------|---------|
| Chromophobe | Clear cell | Mixed | Papillary | TFE translocation | Unknown |
|-------------|------------|-------|-----------|-------------------|---------|



Uniprot ID: Q92583, analyte: CCL17

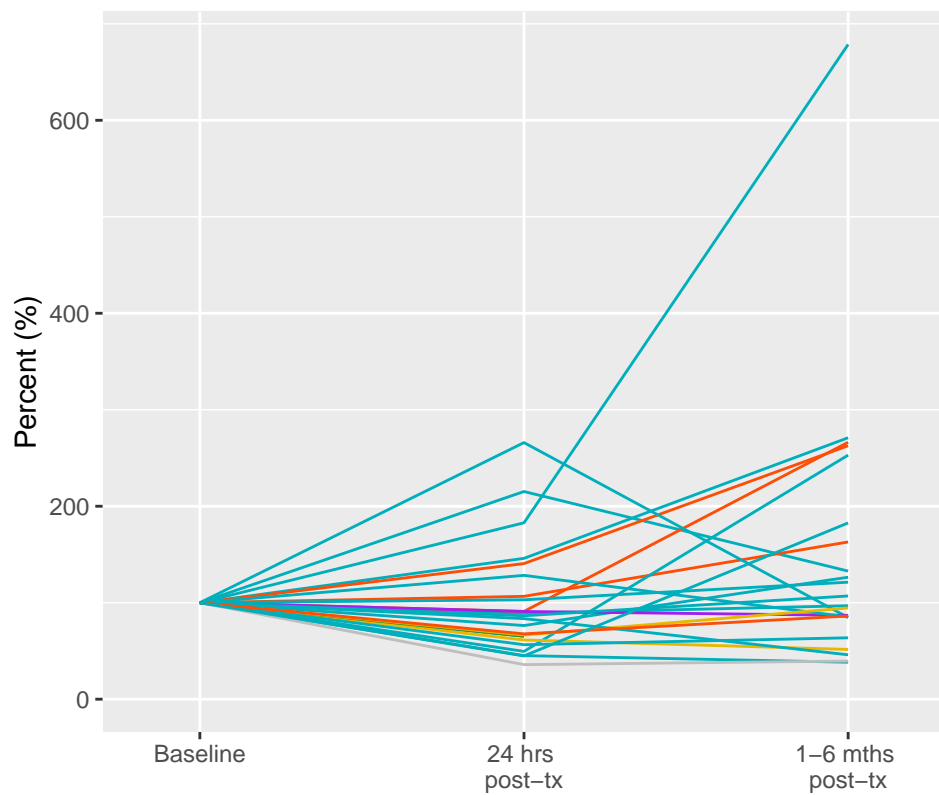

Uniprot ID: O15123, analyte: ANGPT2

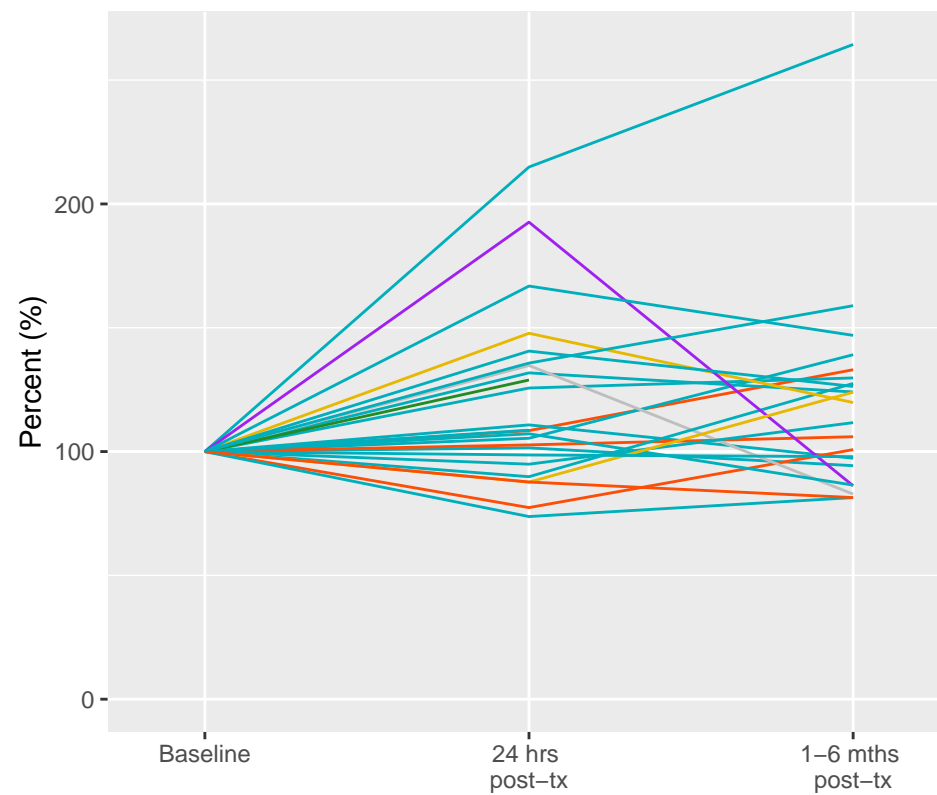

Uniprot ID: P21246, analyte: PTN

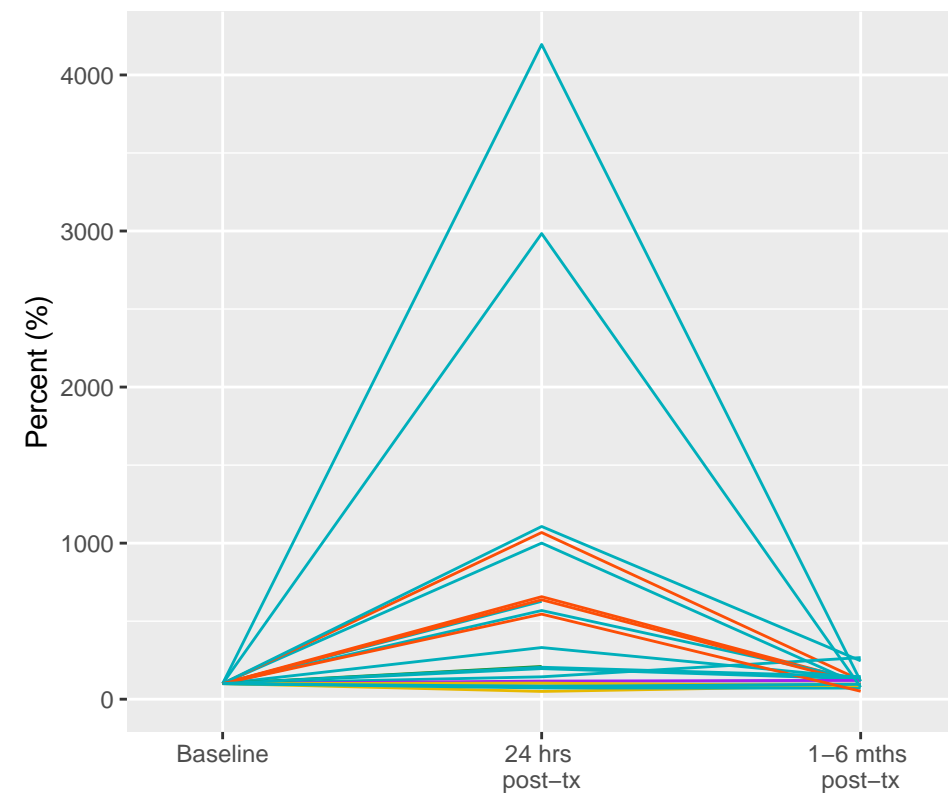

Histology

|             |            |       |           |                   |         |
|-------------|------------|-------|-----------|-------------------|---------|
| Chromophobe | Clear cell | Mixed | Papillary | TFE translocation | Unknown |
|-------------|------------|-------|-----------|-------------------|---------|

Uniprot ID: P48061, analyte: CXCL12

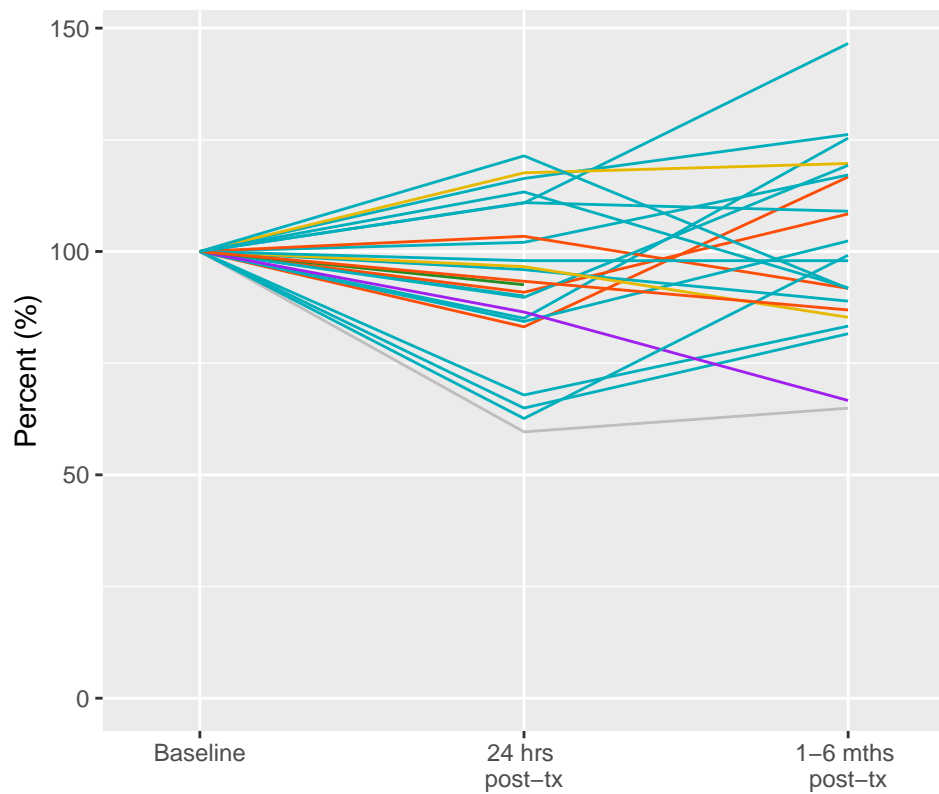

Uniprot ID: P01579, analyte: IFN-gamma

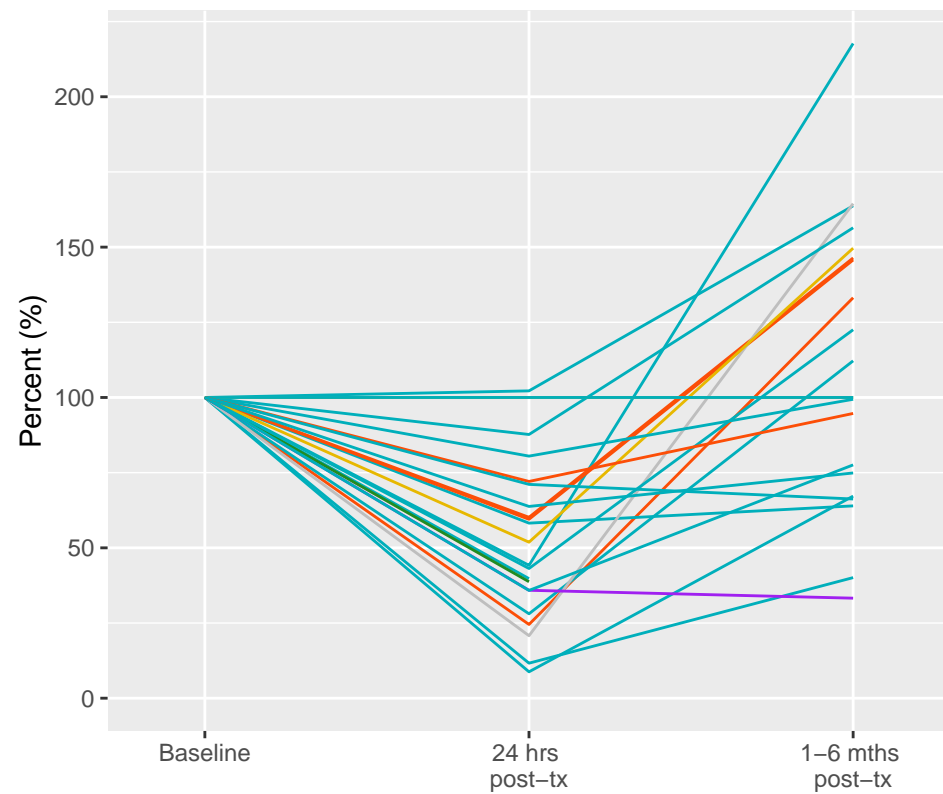

Uniprot ID: Q9UQV4, analyte: LAMP3

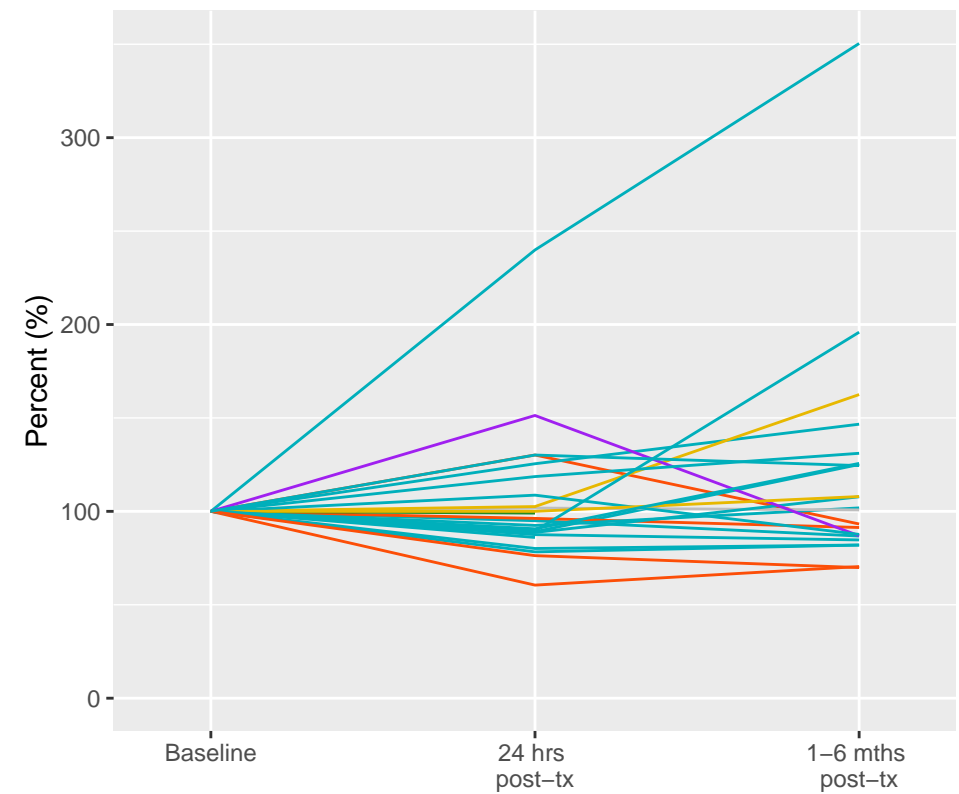

Histology

|             |            |       |           |                   |         |
|-------------|------------|-------|-----------|-------------------|---------|
| Chromophobe | Clear cell | Mixed | Papillary | TFE translocation | Unknown |
|-------------|------------|-------|-----------|-------------------|---------|

Uniprot ID: Q14790, analyte: CASP-8

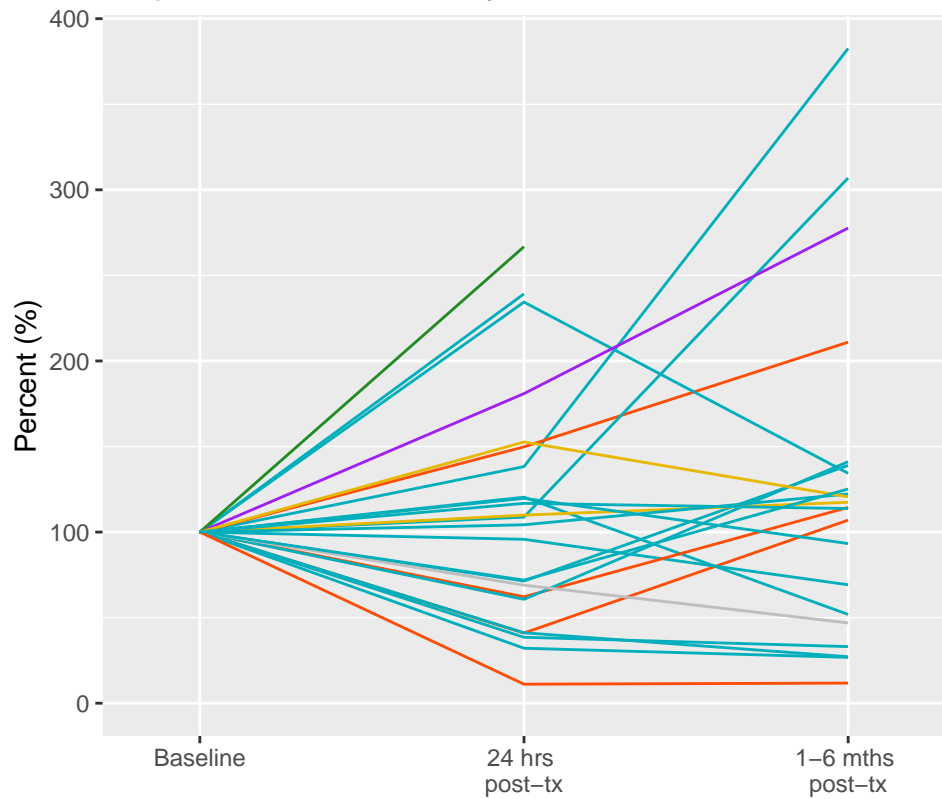

Uniprot ID: O75144, analyte: ICOSLG

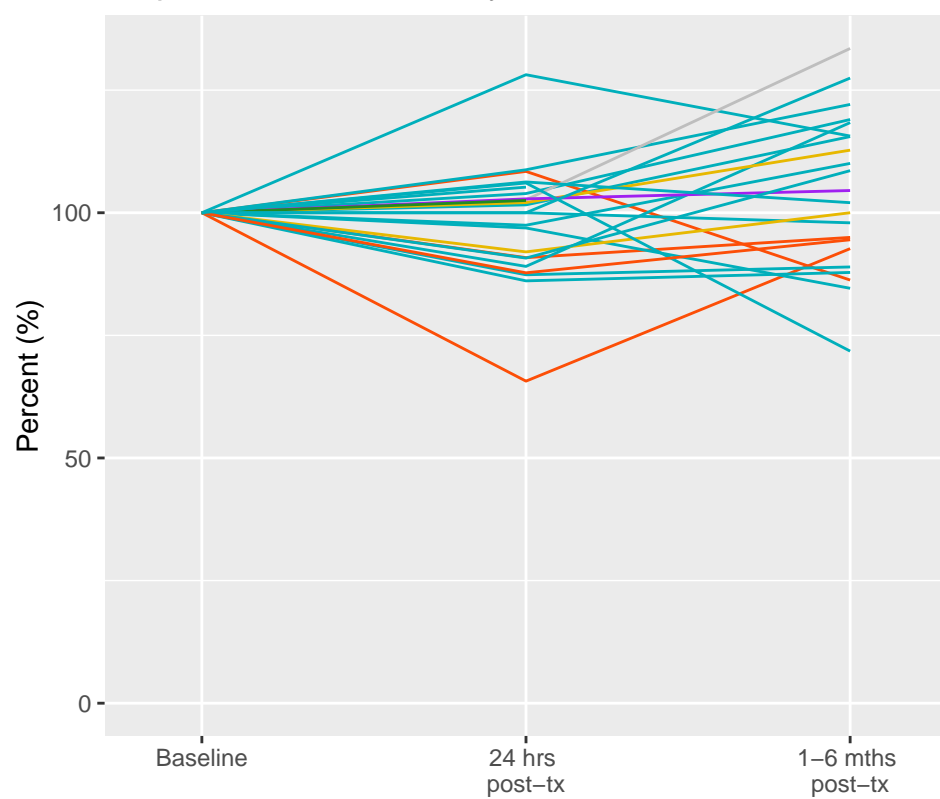

Uniprot ID: P39900, analyte: MMP12

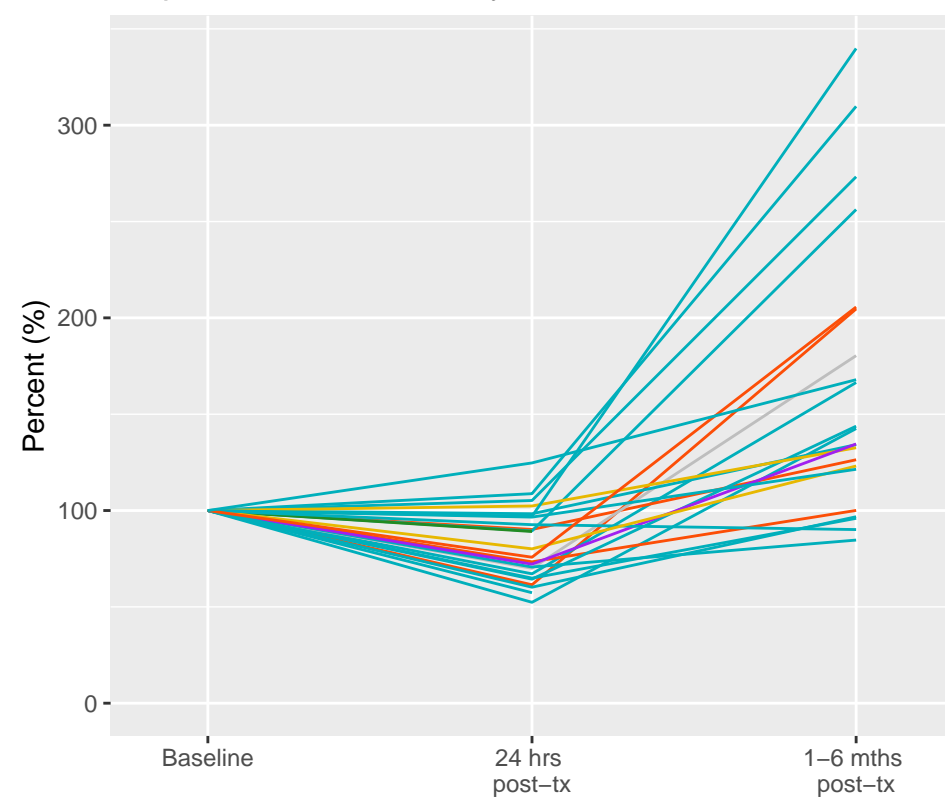

Histology

|             |            |       |           |                   |         |
|-------------|------------|-------|-----------|-------------------|---------|
| Chromophobe | Clear cell | Mixed | Papillary | TFE translocation | Unknown |
|-------------|------------|-------|-----------|-------------------|---------|

Uniprot ID: O43927, analyte: CXCL13

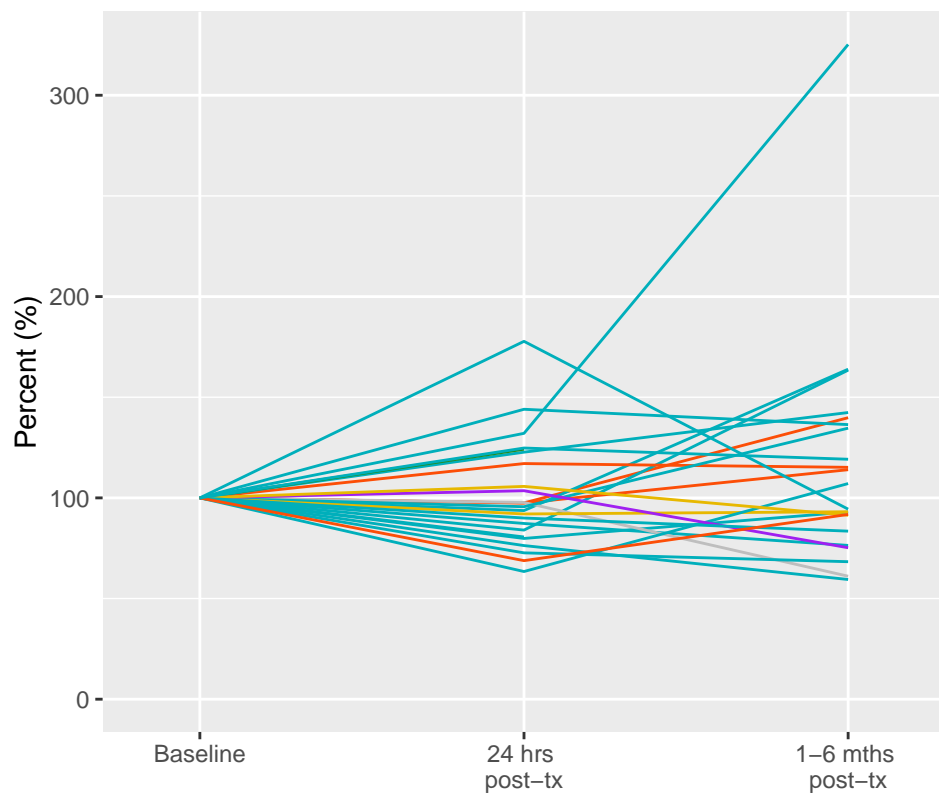

Uniprot ID: Q9BQ51, analyte: PD-L2

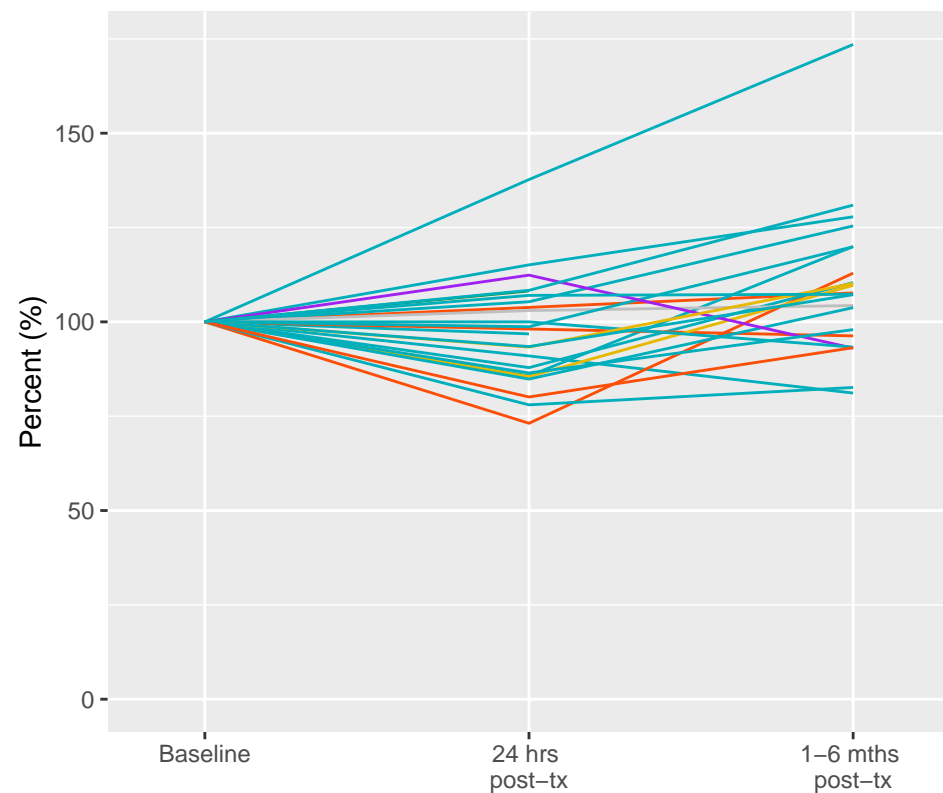

Uniprot ID: P15692, analyte: VEGFA

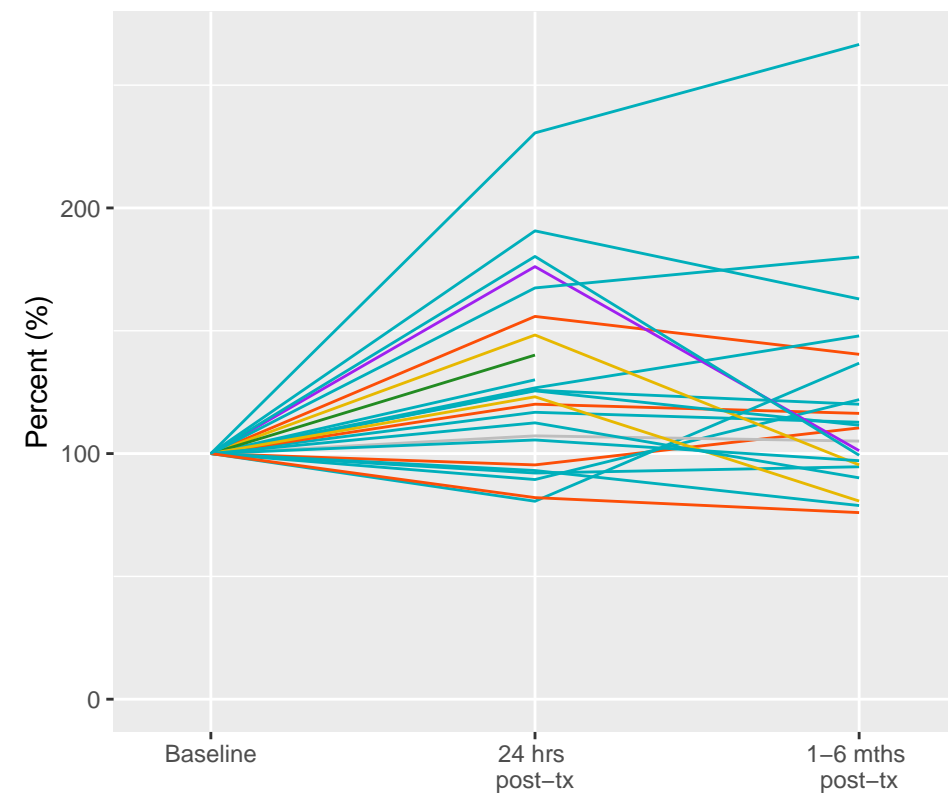

Histology

|             |            |       |           |                   |         |
|-------------|------------|-------|-----------|-------------------|---------|
| Chromophobe | Clear cell | Mixed | Papillary | TFE translocation | Unknown |
|-------------|------------|-------|-----------|-------------------|---------|

Uniprot ID: P05112, analyte: IL4

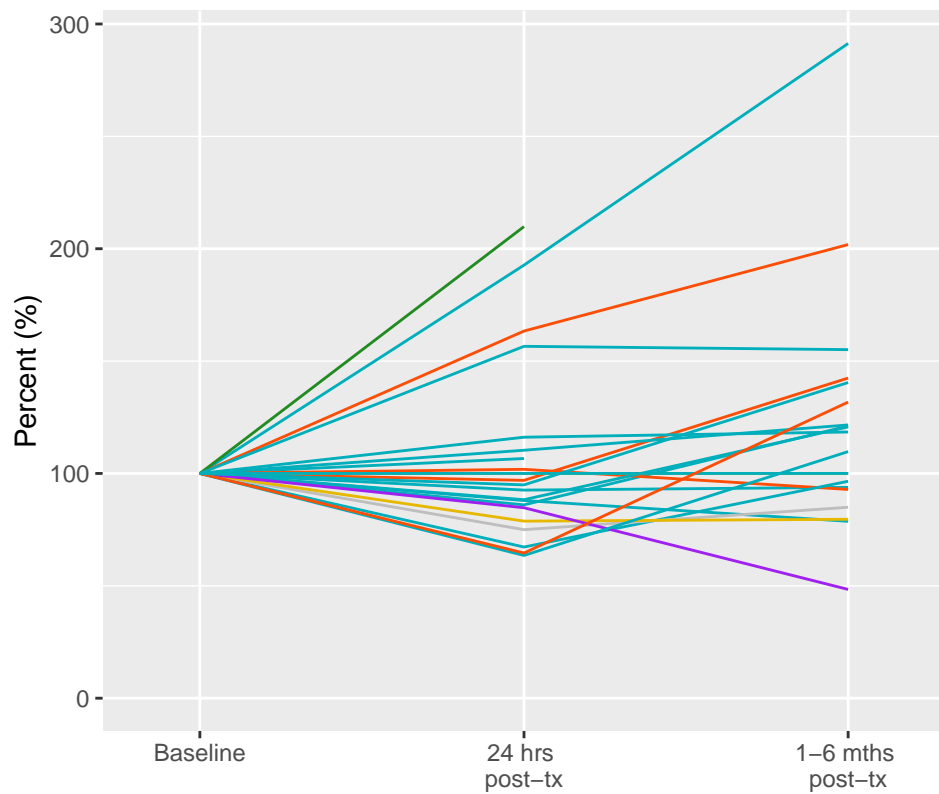

Uniprot ID: P18627, analyte: LAG3

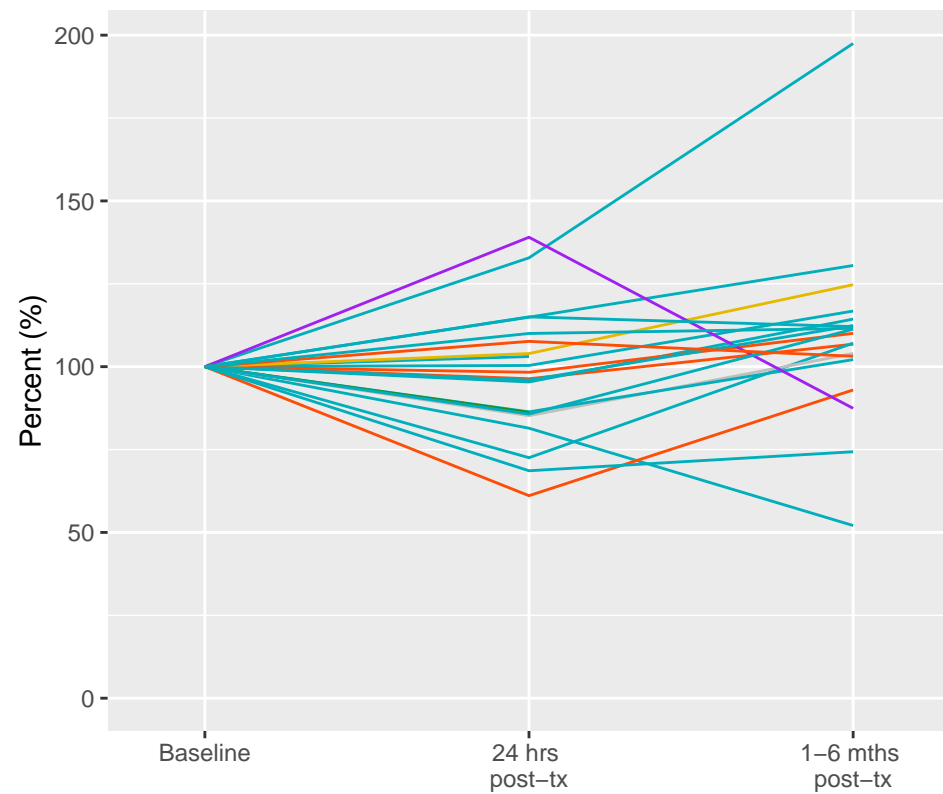

Uniprot ID: P42701, analyte: IL12RB1

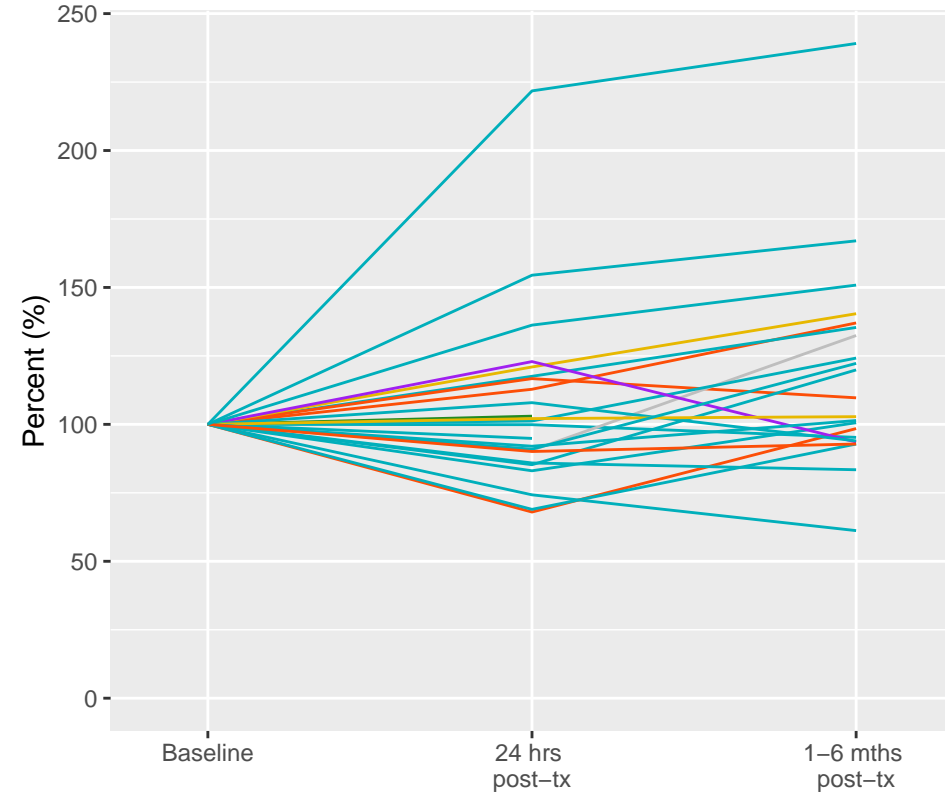

Histology

|             |            |       |           |                   |         |
|-------------|------------|-------|-----------|-------------------|---------|
| Chromophobe | Clear cell | Mixed | Papillary | TFE translocation | Unknown |
|-------------|------------|-------|-----------|-------------------|---------|

Uniprot ID: P35225, analyte: IL13

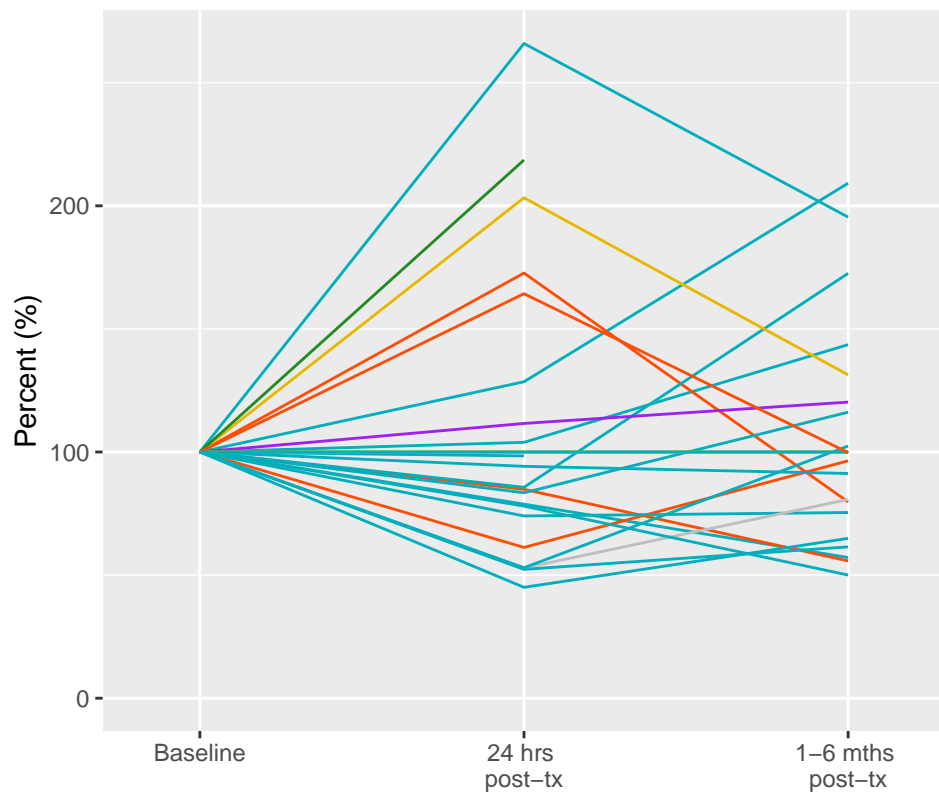

Uniprot ID: P78556, analyte: CCL20

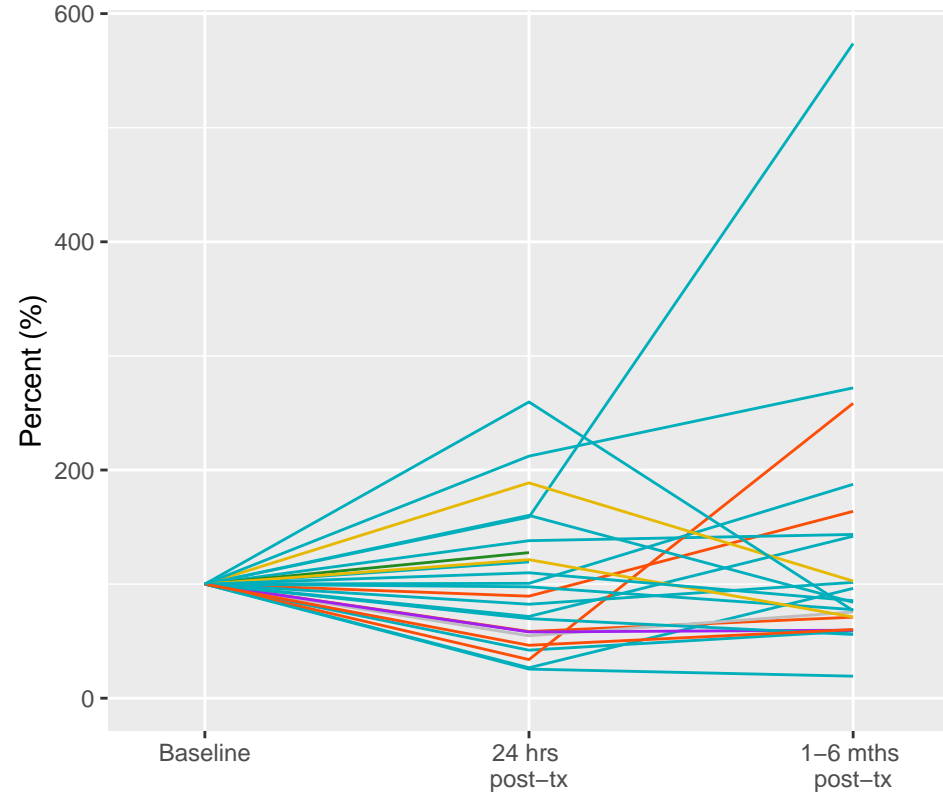

Uniprot ID: P01375, analyte: TNF

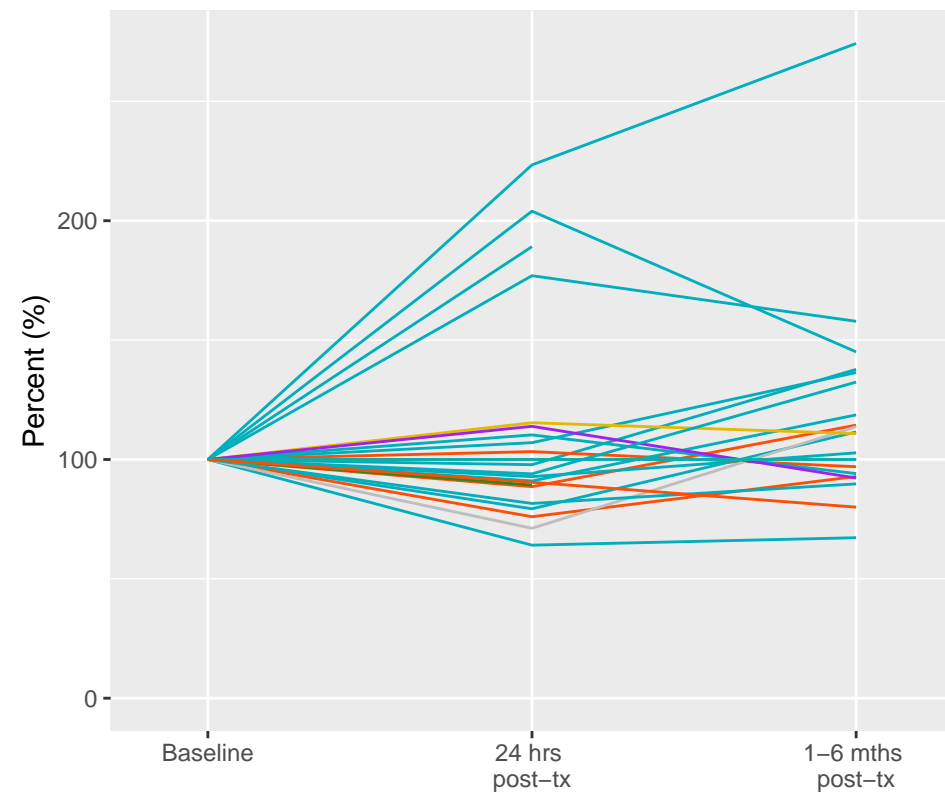

Histology

|             |            |       |           |                   |         |
|-------------|------------|-------|-----------|-------------------|---------|
| Chromophobe | Clear cell | Mixed | Papillary | TFE translocation | Unknown |
|-------------|------------|-------|-----------|-------------------|---------|

Uniprot ID: Q13241, analyte: KLRD1

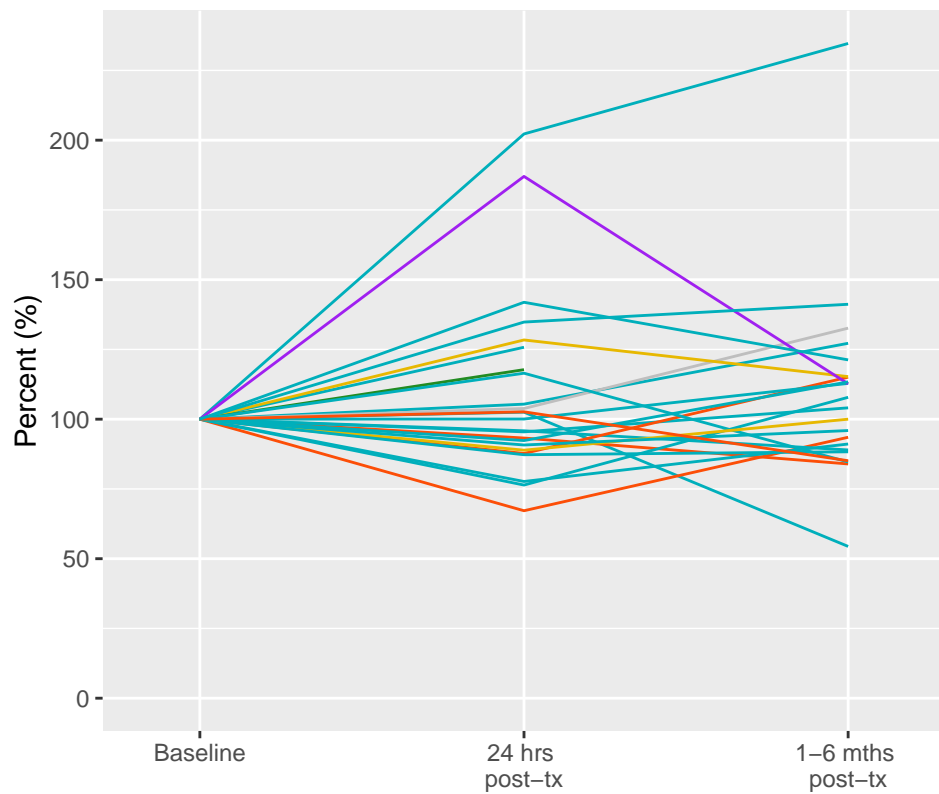

Uniprot ID: P10144, analyte: GZMB

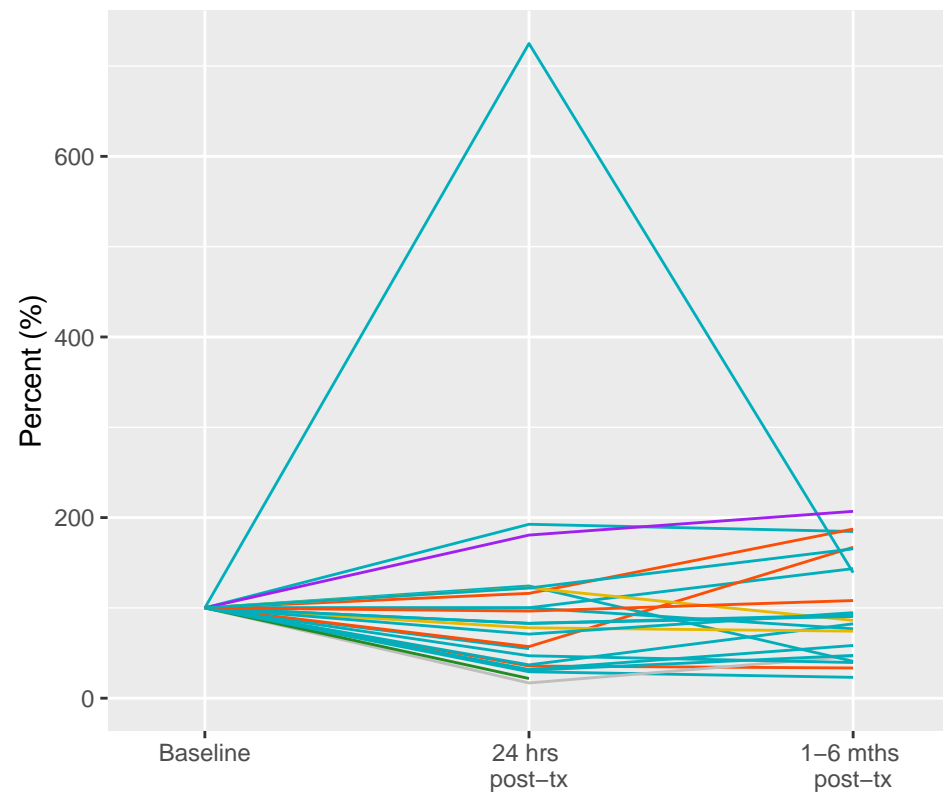

Uniprot ID: Q01151, analyte: CD83

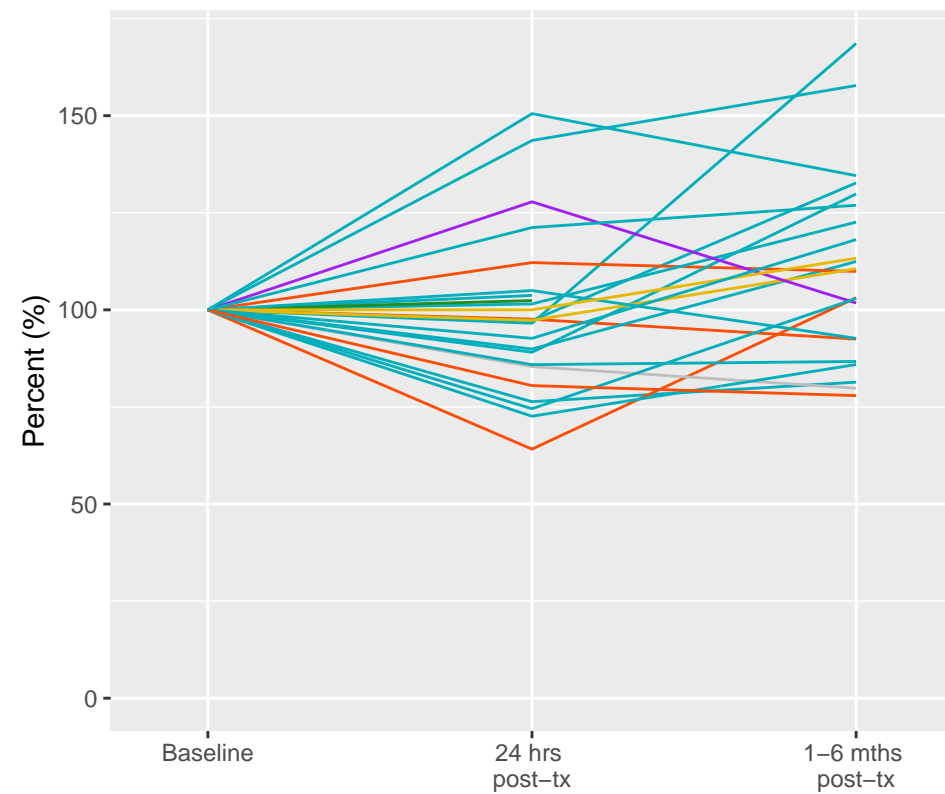

Histology

|             |            |       |           |                   |         |
|-------------|------------|-------|-----------|-------------------|---------|
| Chromophobe | Clear cell | Mixed | Papillary | TFE translocation | Unknown |
|-------------|------------|-------|-----------|-------------------|---------|

Uniprot ID: P29459.P29460, analyte: IL12

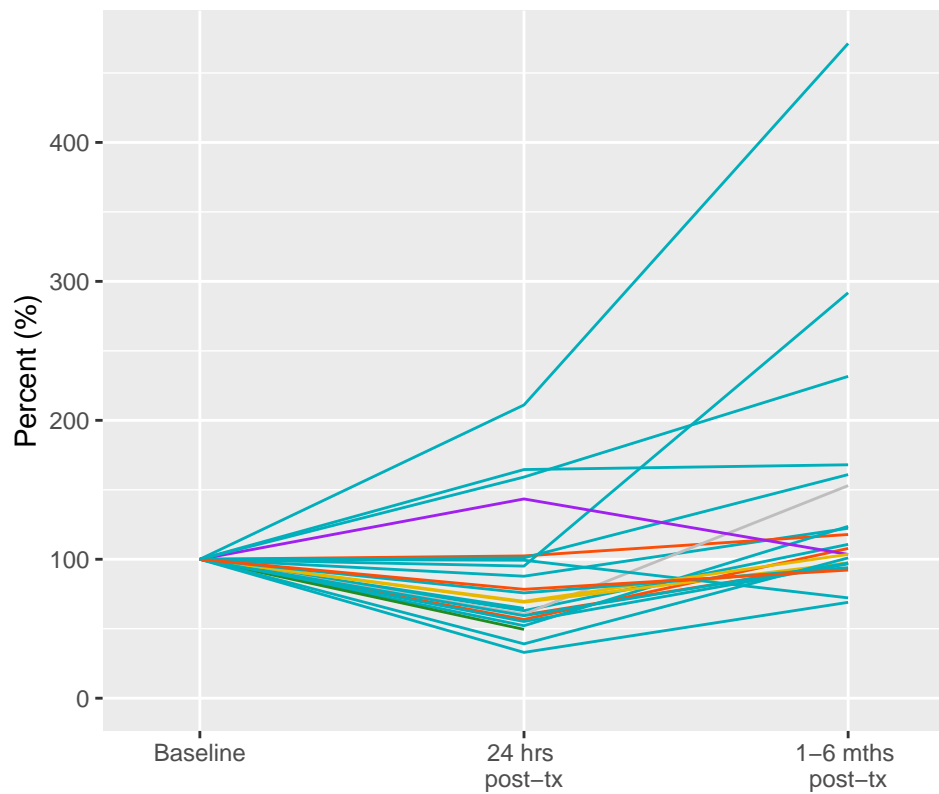

Uniprot ID: P09603, analyte: CSF-1

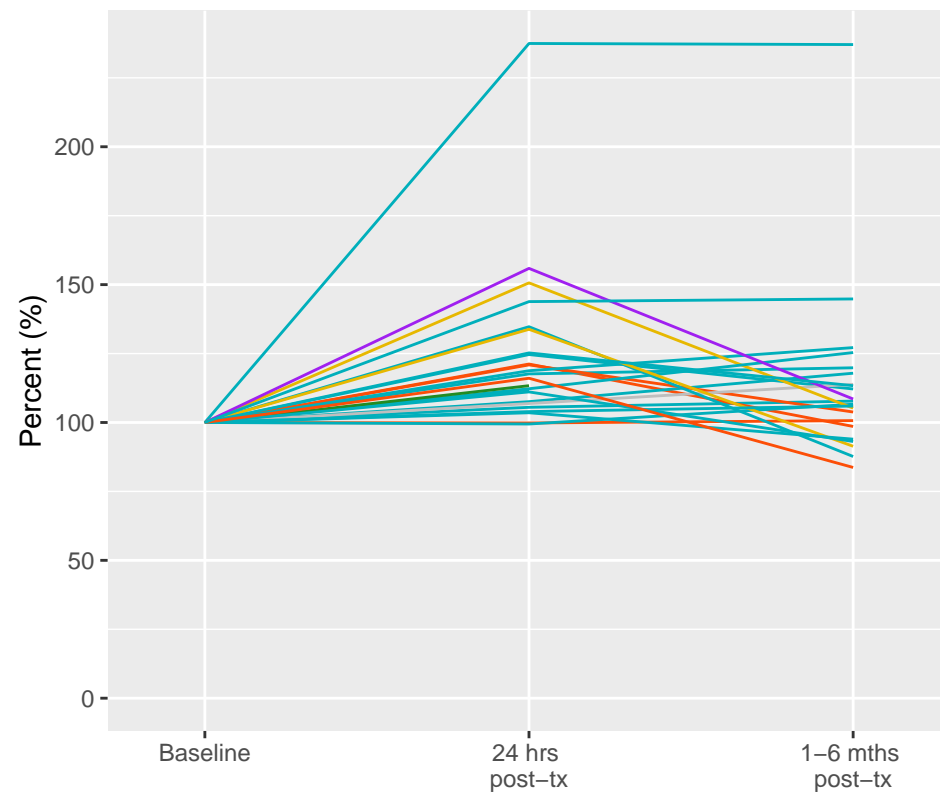

Uniprot ID: P40222, analyte: TXLNA

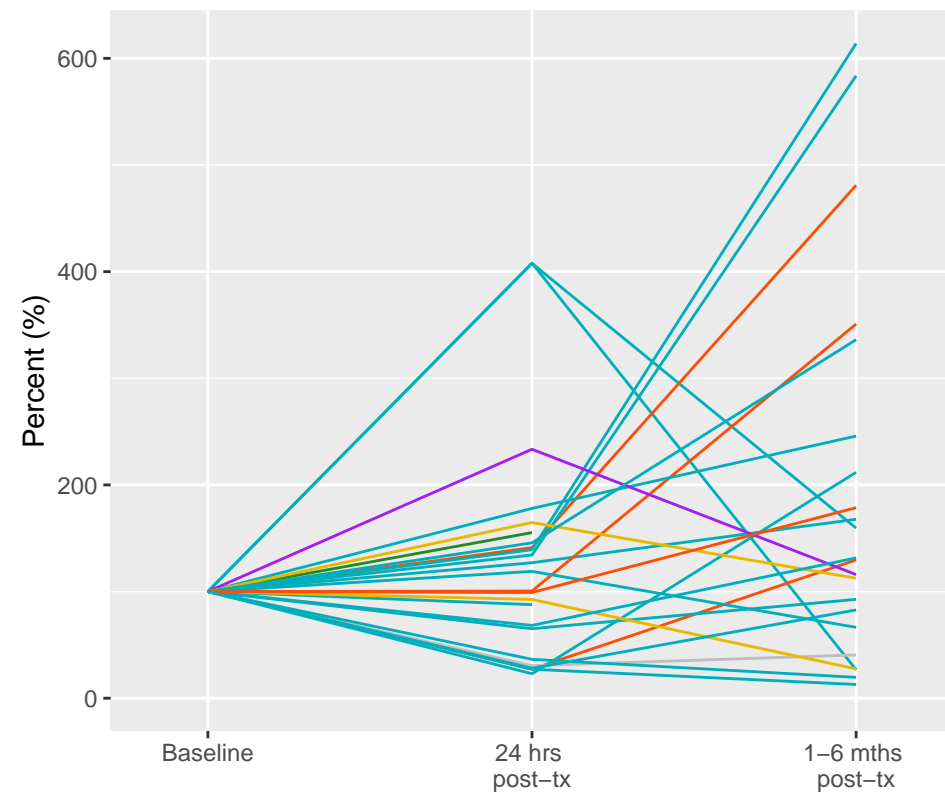

Histology

|             |            |       |           |                   |         |
|-------------|------------|-------|-----------|-------------------|---------|
| Chromophobe | Clear cell | Mixed | Papillary | TFE translocation | Unknown |
|-------------|------------|-------|-----------|-------------------|---------|



Uniprot ID: P16870, analyte: CPE

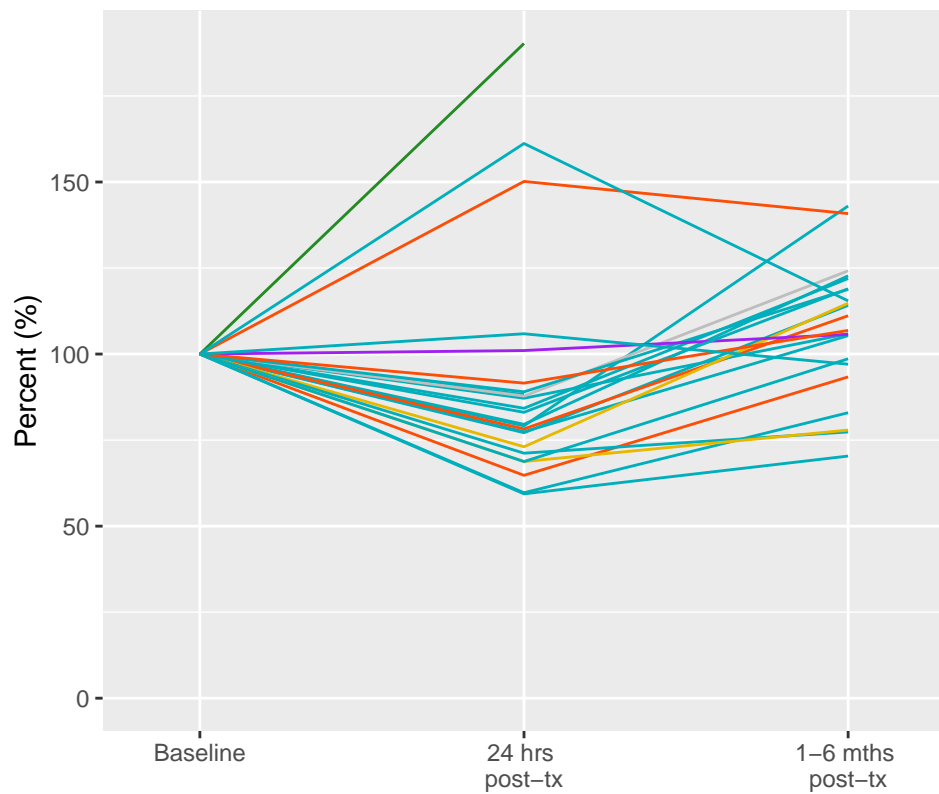

Uniprot ID: Q9UKR3, analyte: KLK13

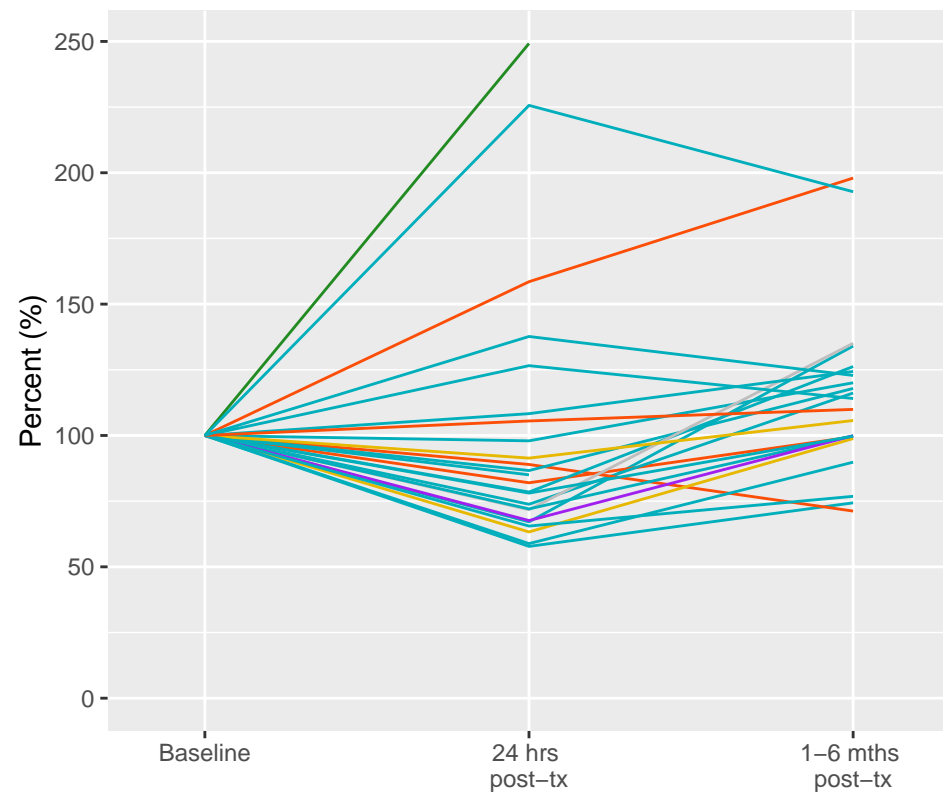

Uniprot ID: P13688, analyte: CEACAM1

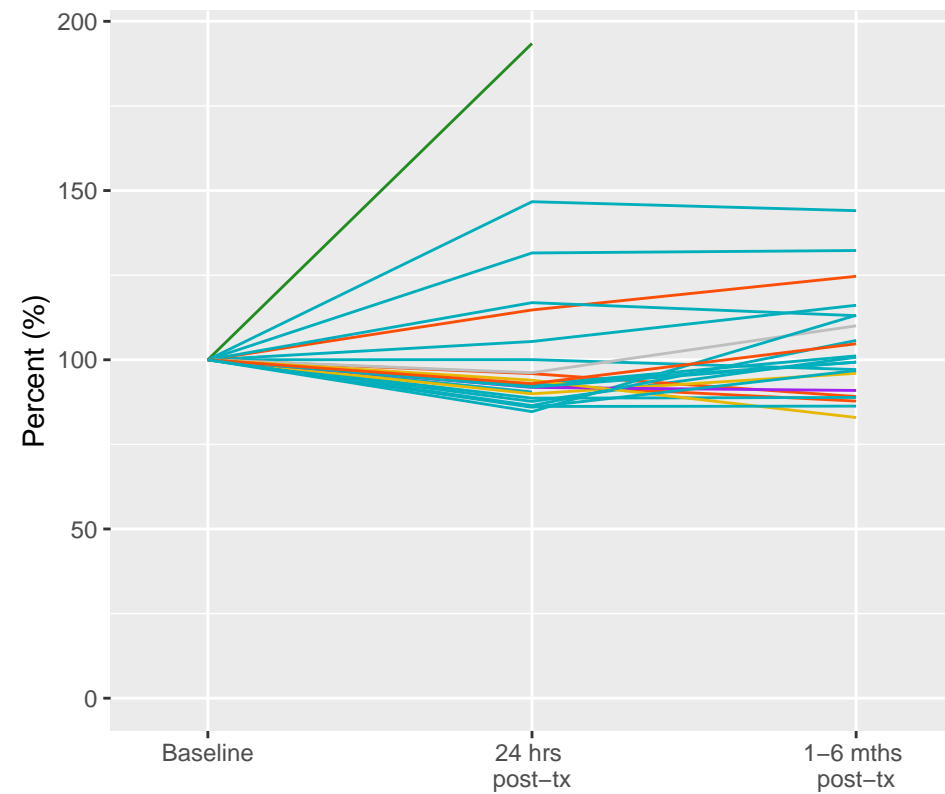

Histology

|             |            |       |           |                   |         |
|-------------|------------|-------|-----------|-------------------|---------|
| Chromophobe | Clear cell | Mixed | Papillary | TFE translocation | Unknown |
|-------------|------------|-------|-----------|-------------------|---------|

Uniprot ID: Q13421, analyte: MSLN

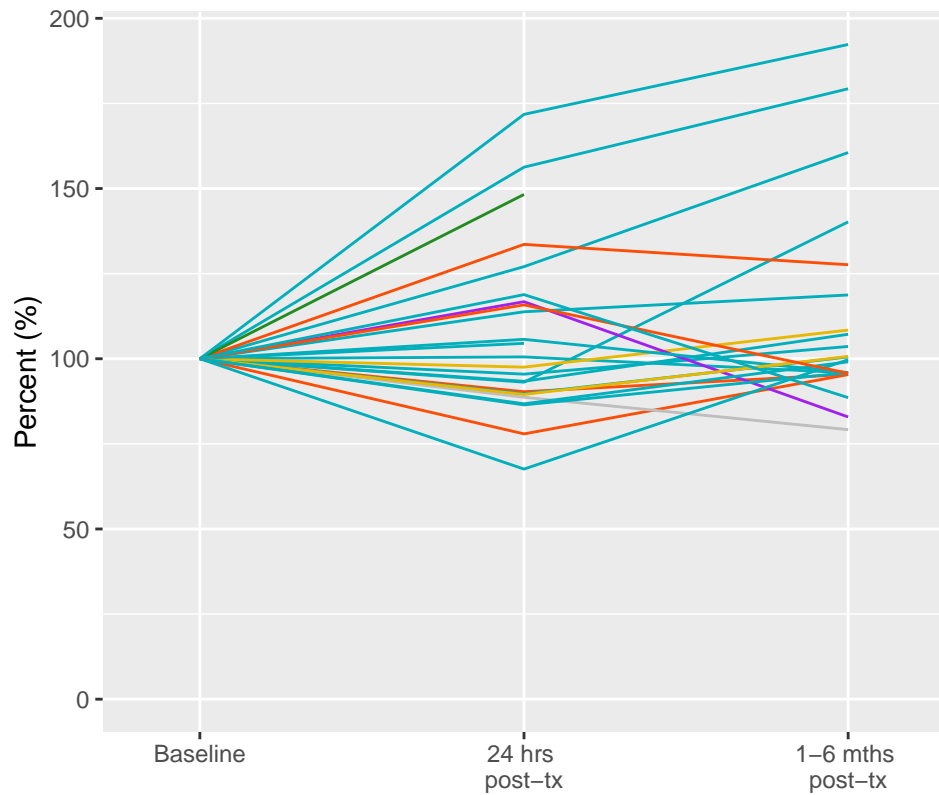

Uniprot ID: O75888, analyte: TNFSF13

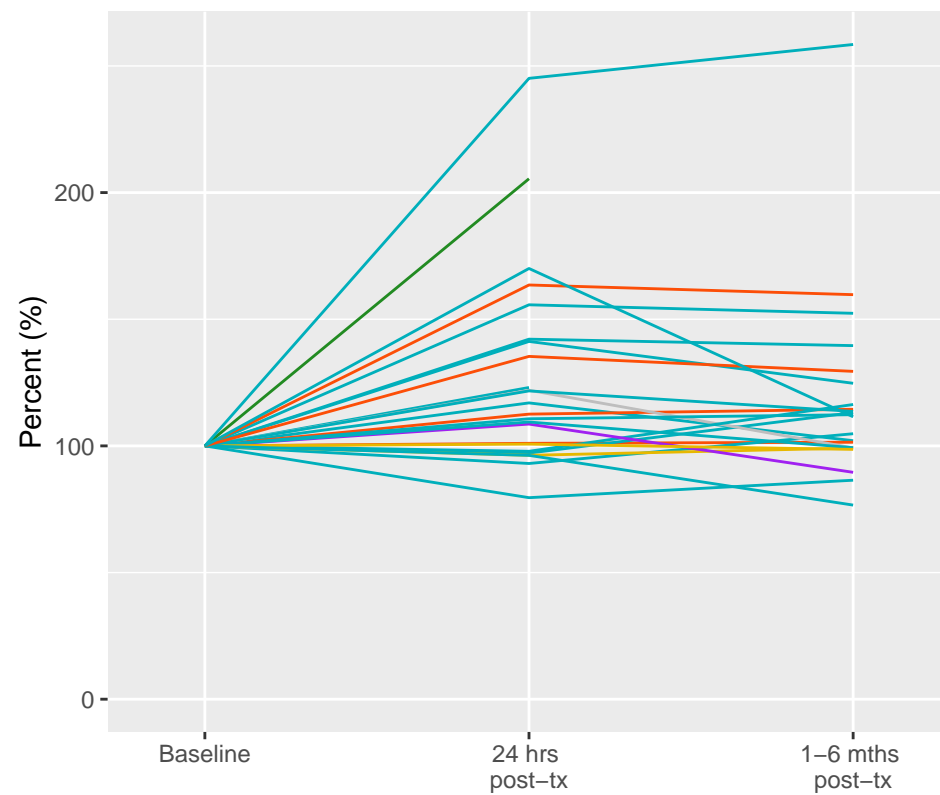

Uniprot ID: O95407, analyte: TNFRSF6B

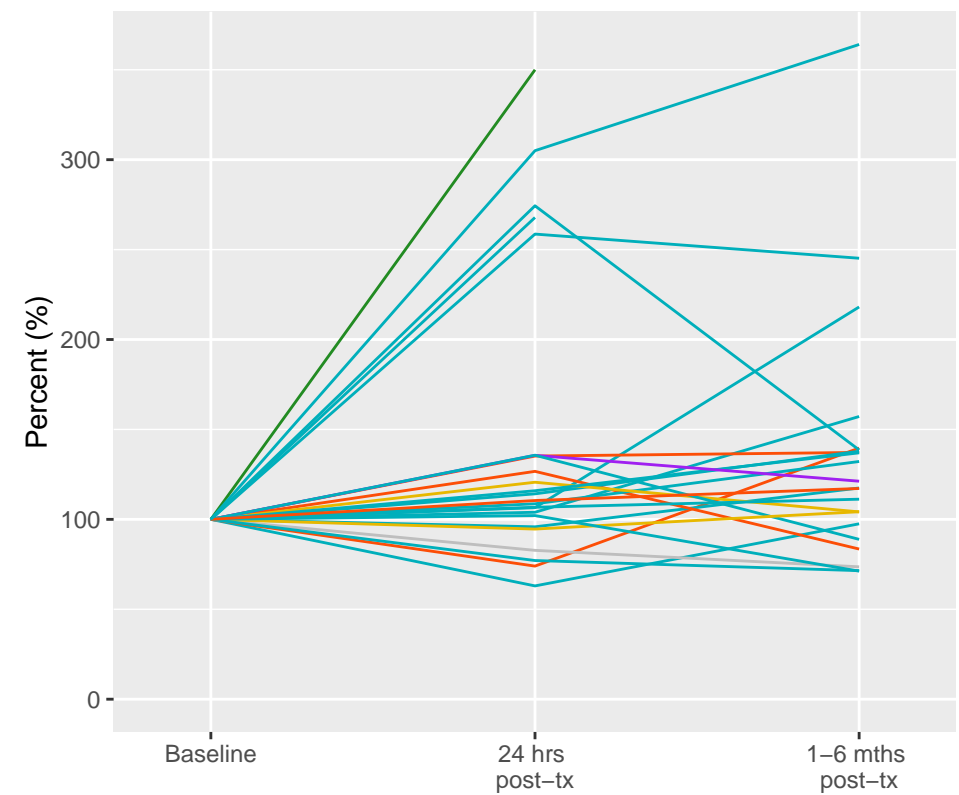

Histology

|             |            |       |           |                   |         |
|-------------|------------|-------|-----------|-------------------|---------|
| Chromophobe | Clear cell | Mixed | Papillary | TFE translocation | Unknown |
|-------------|------------|-------|-----------|-------------------|---------|

Uniprot ID: P18827, analyte: SYND1

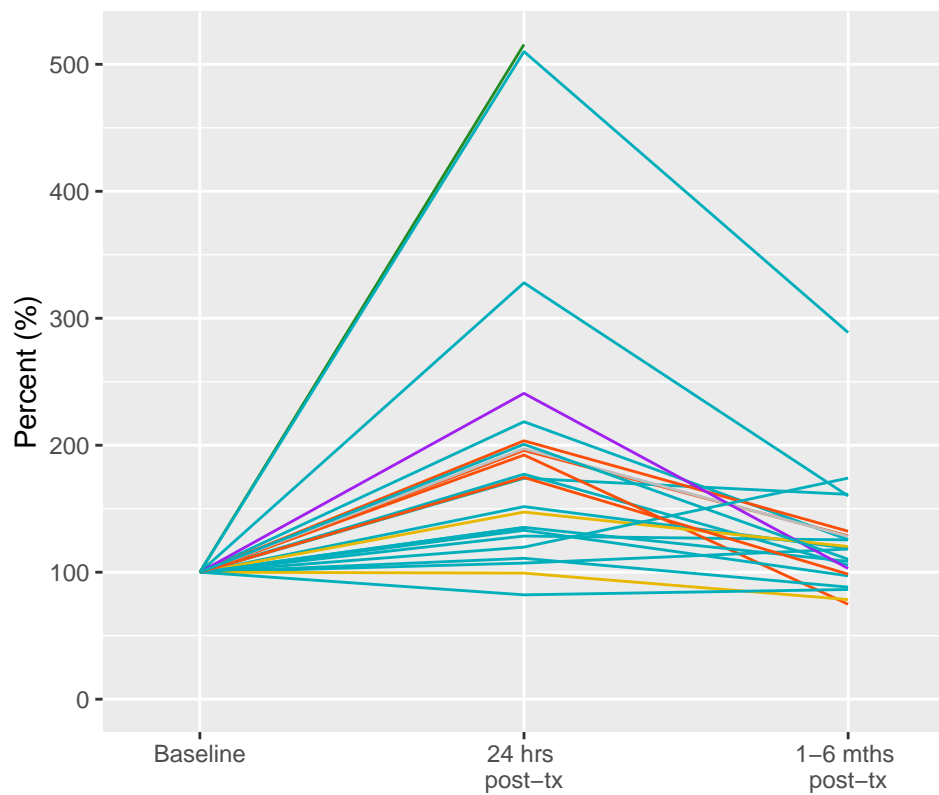

Uniprot ID: P37173, analyte: TGFR-2

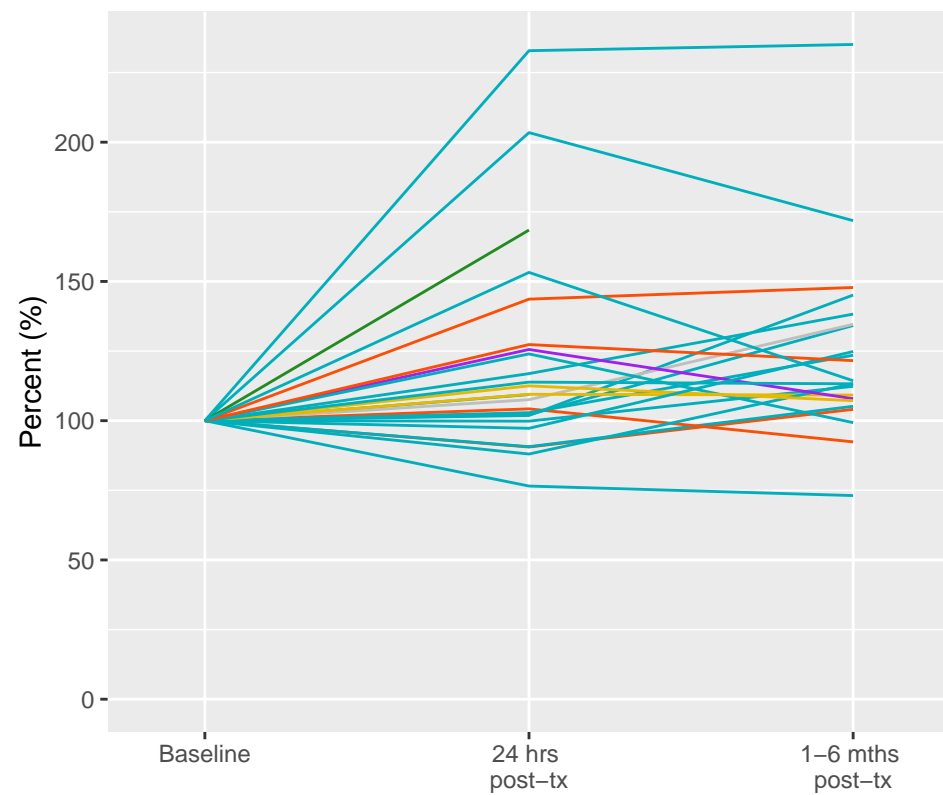

Uniprot ID: P09326, analyte: CD48

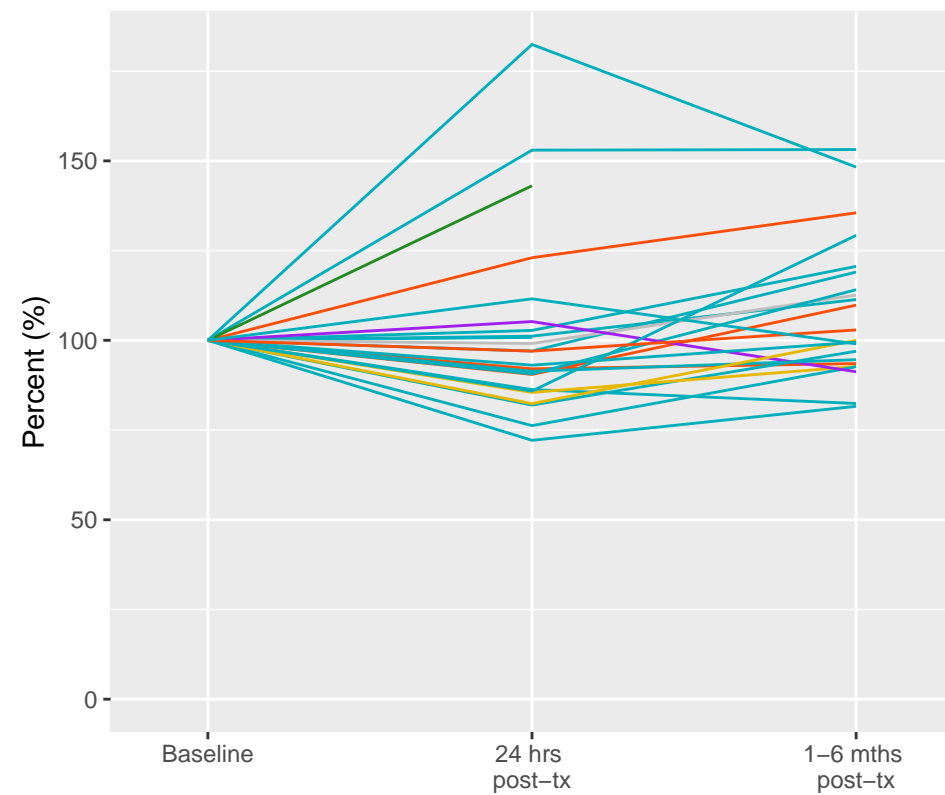

Histology

|             |            |       |           |                   |         |
|-------------|------------|-------|-----------|-------------------|---------|
| Chromophobe | Clear cell | Mixed | Papillary | TFE translocation | Unknown |
|-------------|------------|-------|-----------|-------------------|---------|

Uniprot ID: O14828, analyte: SCAMP3

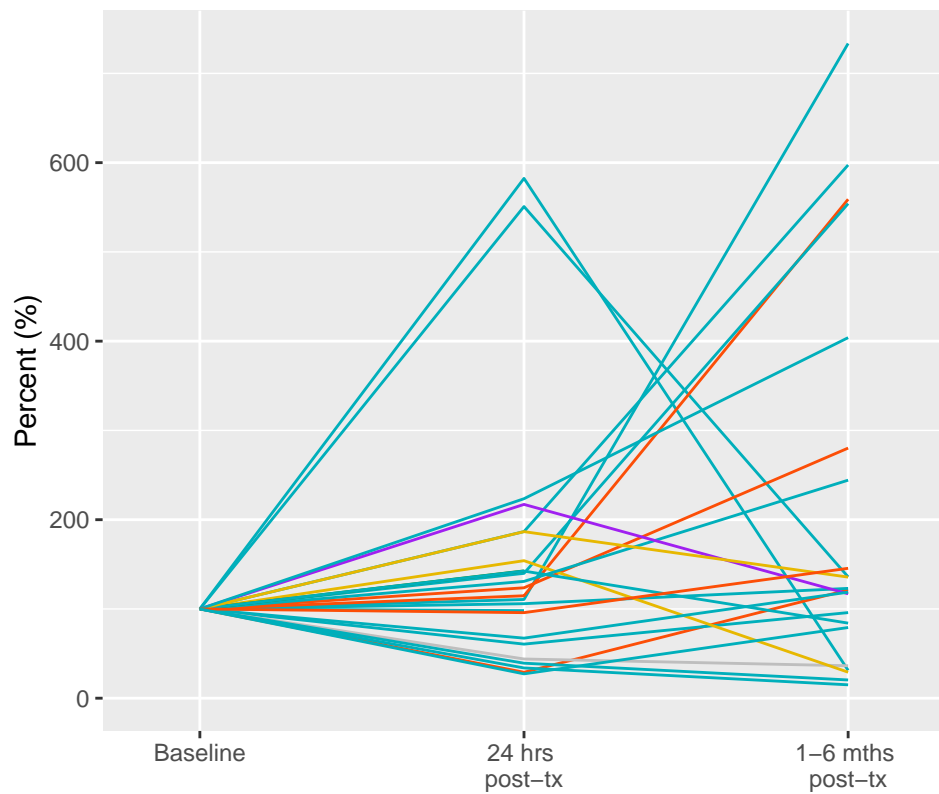

Uniprot ID: Q9HBG7, analyte: LY9

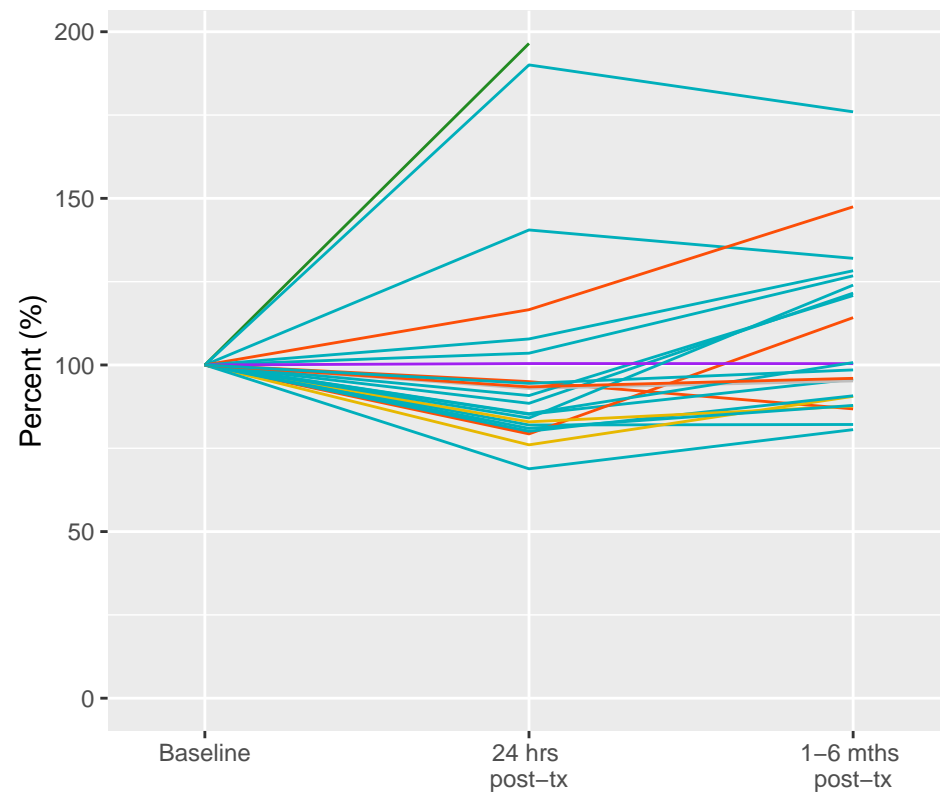

Uniprot ID: P15260, analyte: IFN-gamma-R1

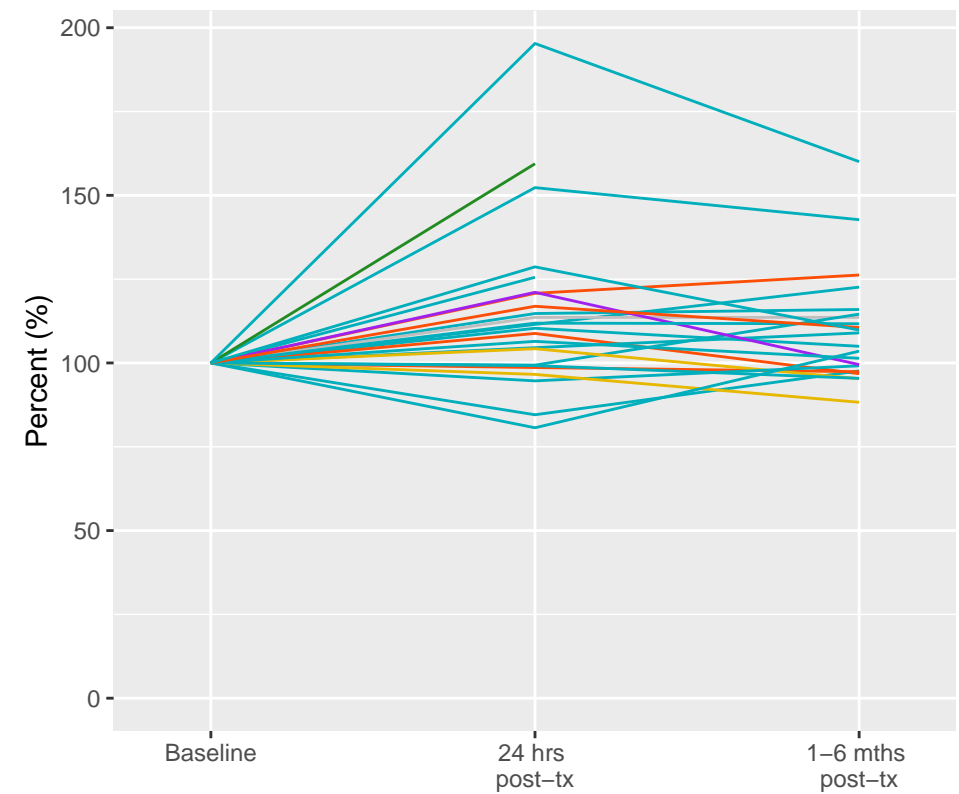

Histology

|             |            |       |           |                   |         |
|-------------|------------|-------|-----------|-------------------|---------|
| Chromophobe | Clear cell | Mixed | Papillary | TFE translocation | Unknown |
|-------------|------------|-------|-----------|-------------------|---------|

Uniprot ID: P06756, analyte: ITGAV

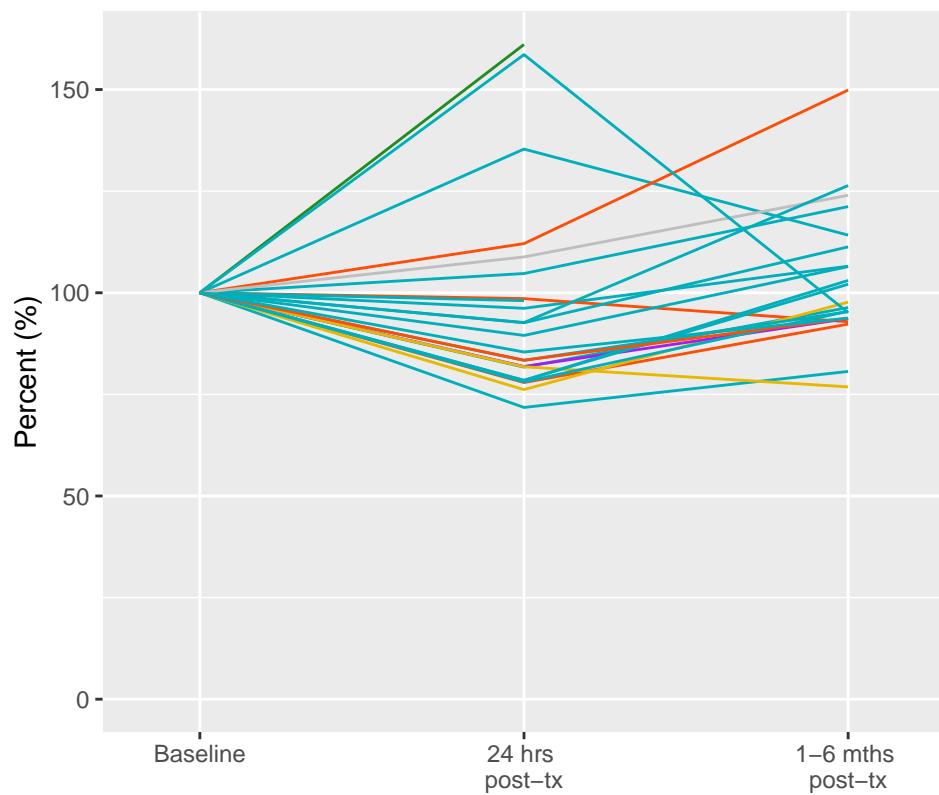

Uniprot ID: Q9UBX7, analyte: hK11

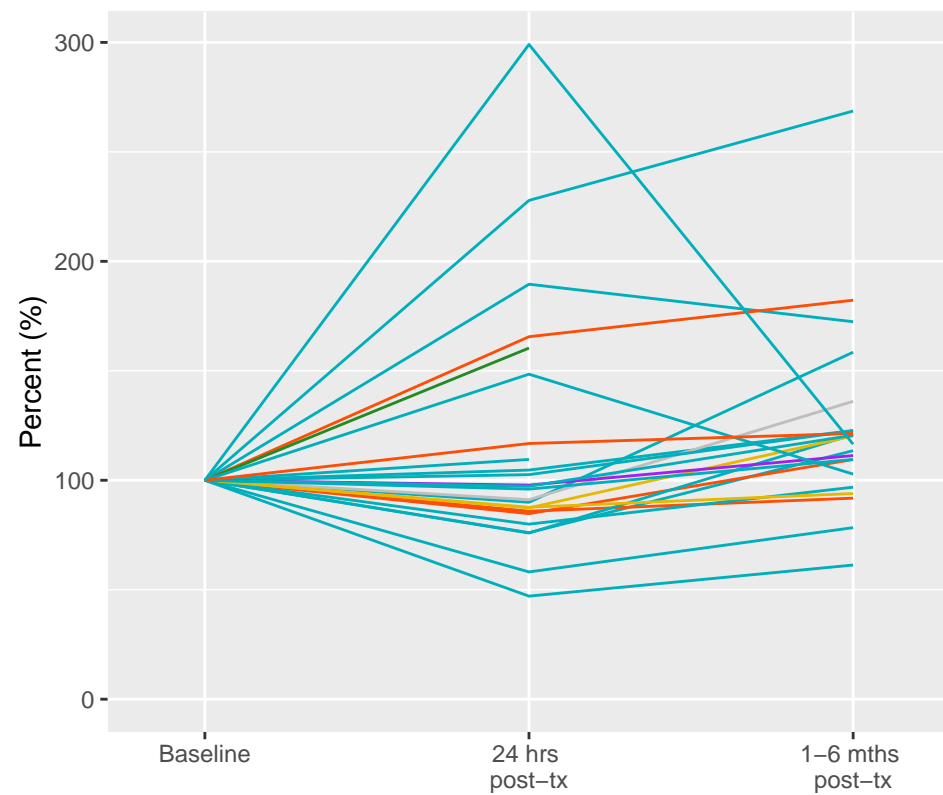

Uniprot ID: P35052, analyte: GPC1

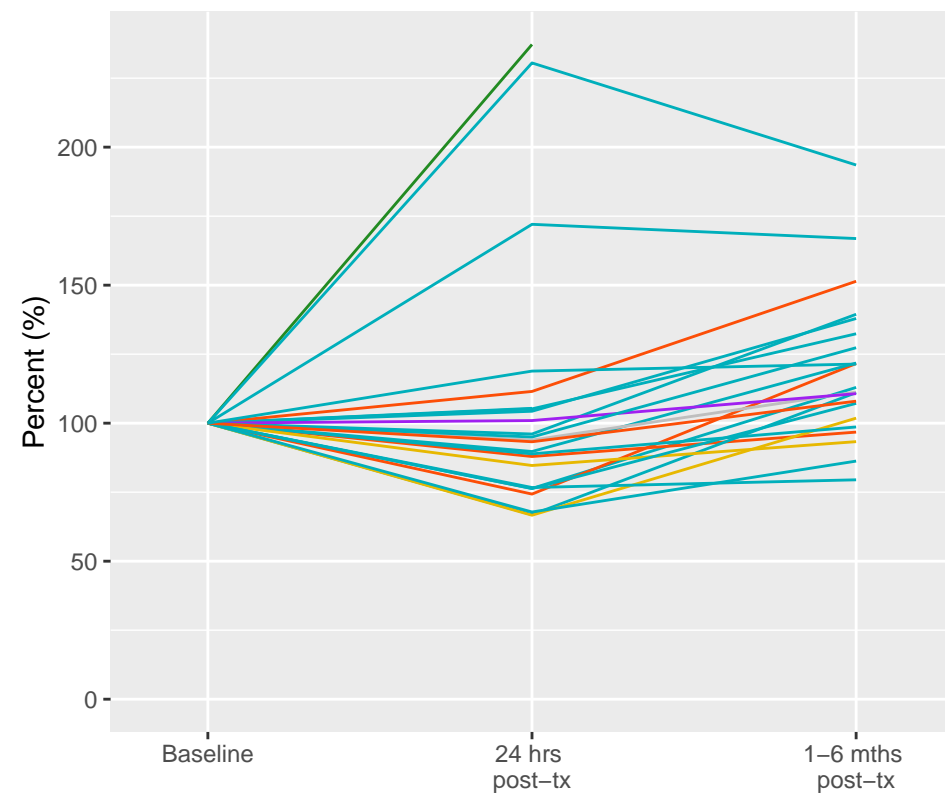

Histology

|             |            |       |           |                   |         |
|-------------|------------|-------|-----------|-------------------|---------|
| Chromophobe | Clear cell | Mixed | Papillary | TFE translocation | Unknown |
|-------------|------------|-------|-----------|-------------------|---------|

Uniprot ID: P48307, analyte: TFPI-2

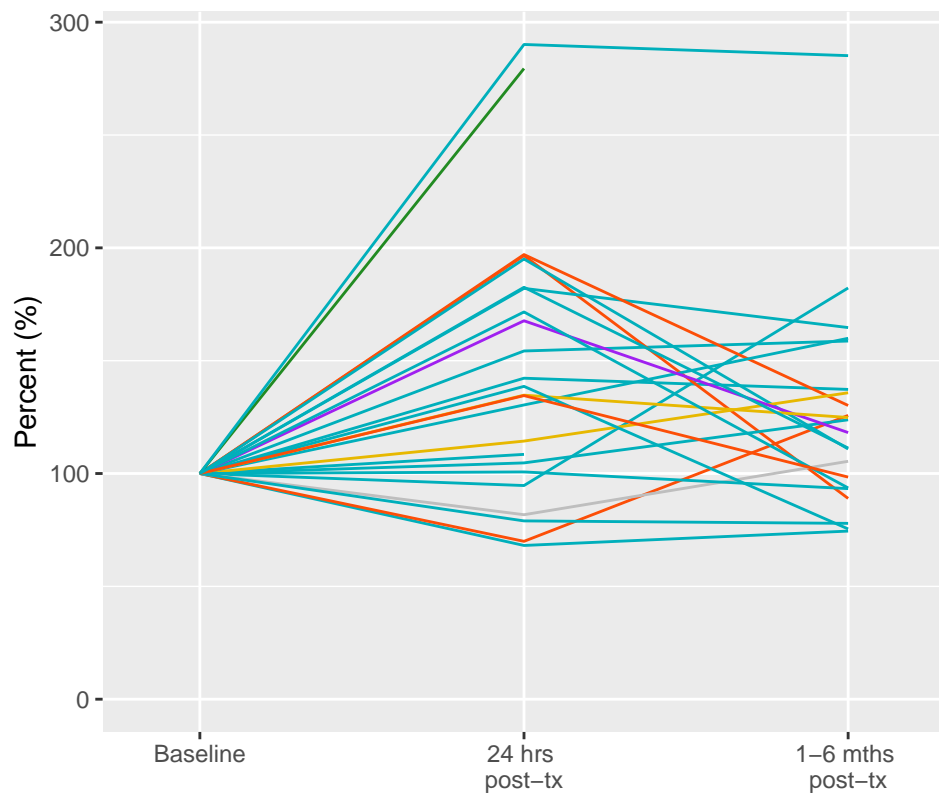

Uniprot ID: O60259, analyte: hK8

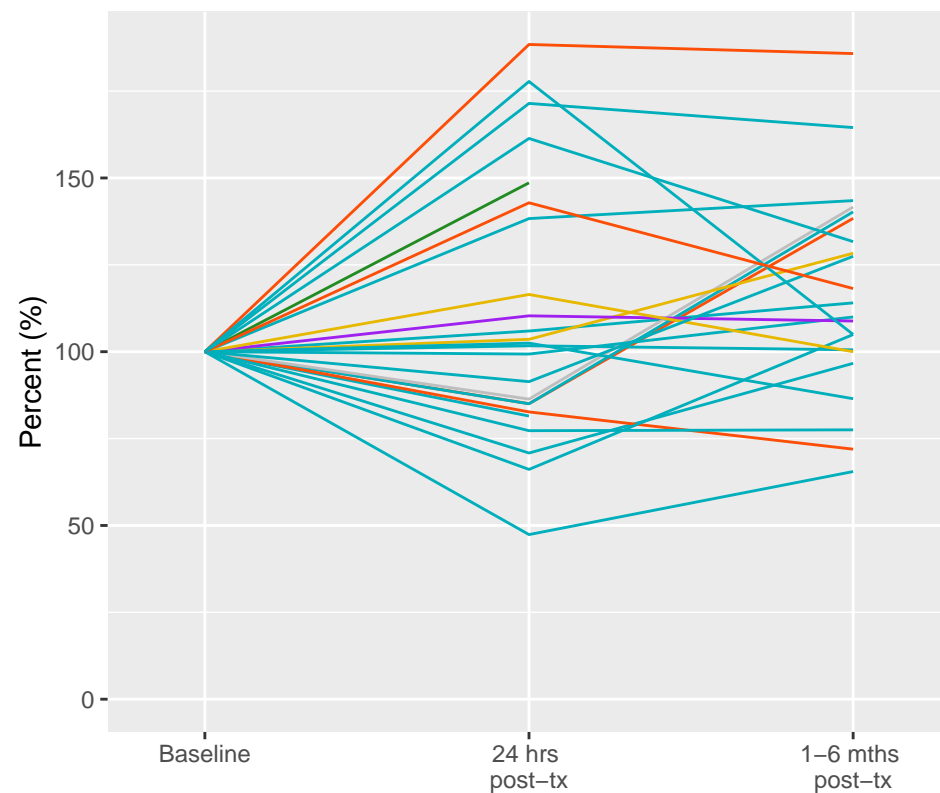

Uniprot ID: O95274, analyte: LYPD3

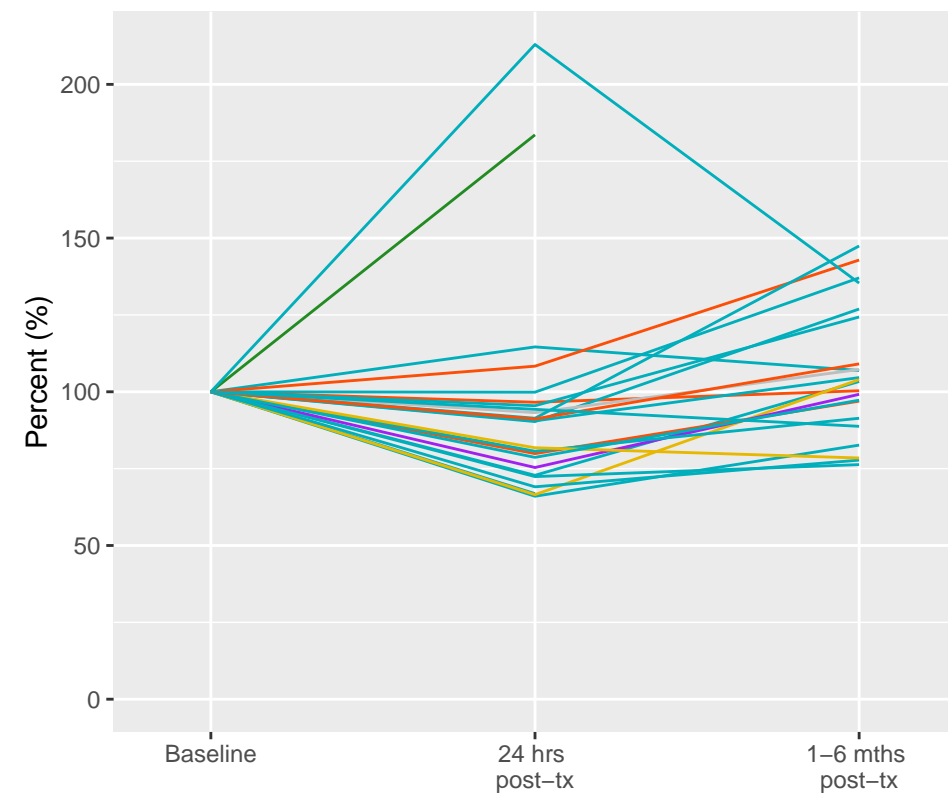

Histology

|             |            |       |           |                   |         |
|-------------|------------|-------|-----------|-------------------|---------|
| Chromophobe | Clear cell | Mixed | Papillary | TFE translocation | Unknown |
|-------------|------------|-------|-----------|-------------------|---------|

Uniprot ID: O00592, analyte: PODXL

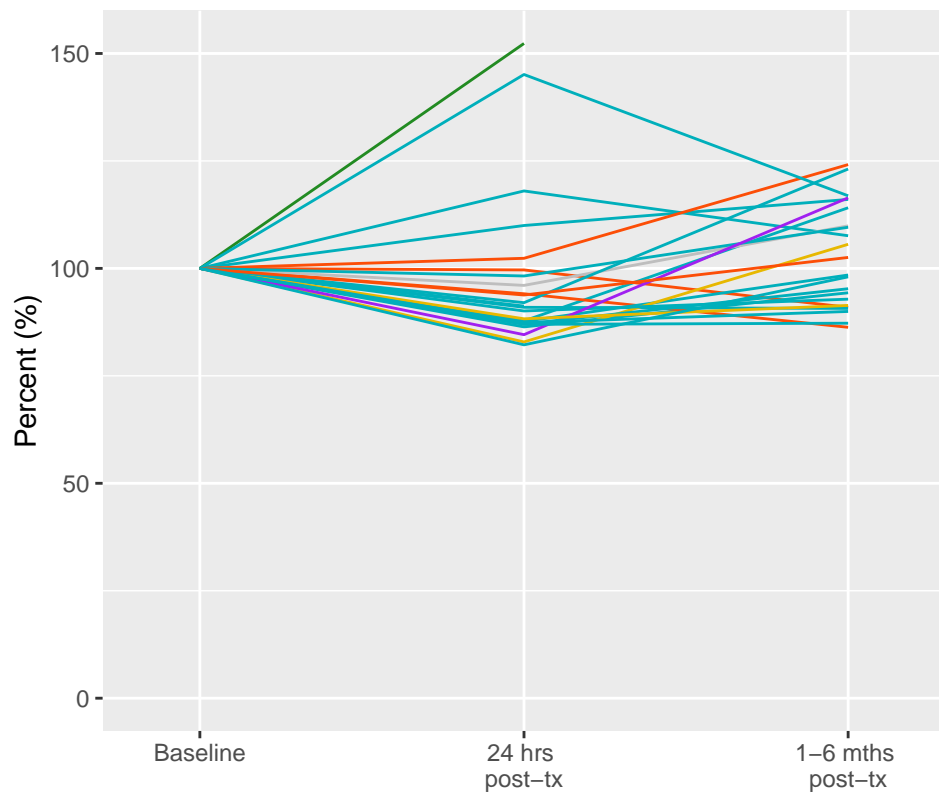

Uniprot ID: P26447, analyte: S100A4

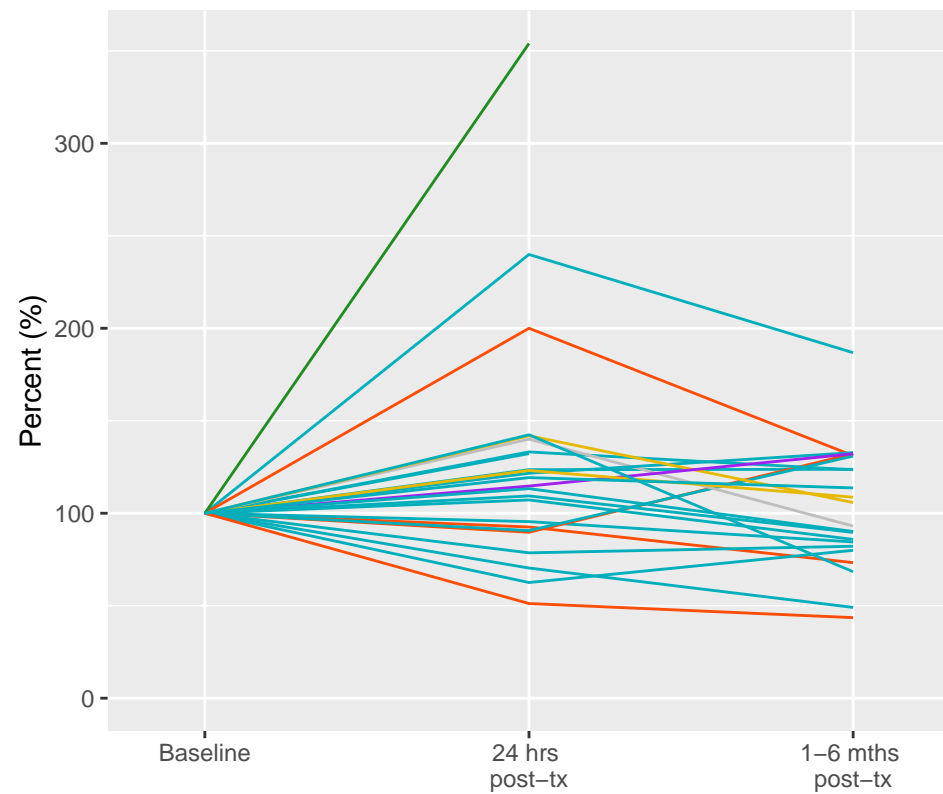

Uniprot ID: P08069, analyte: IGF1R

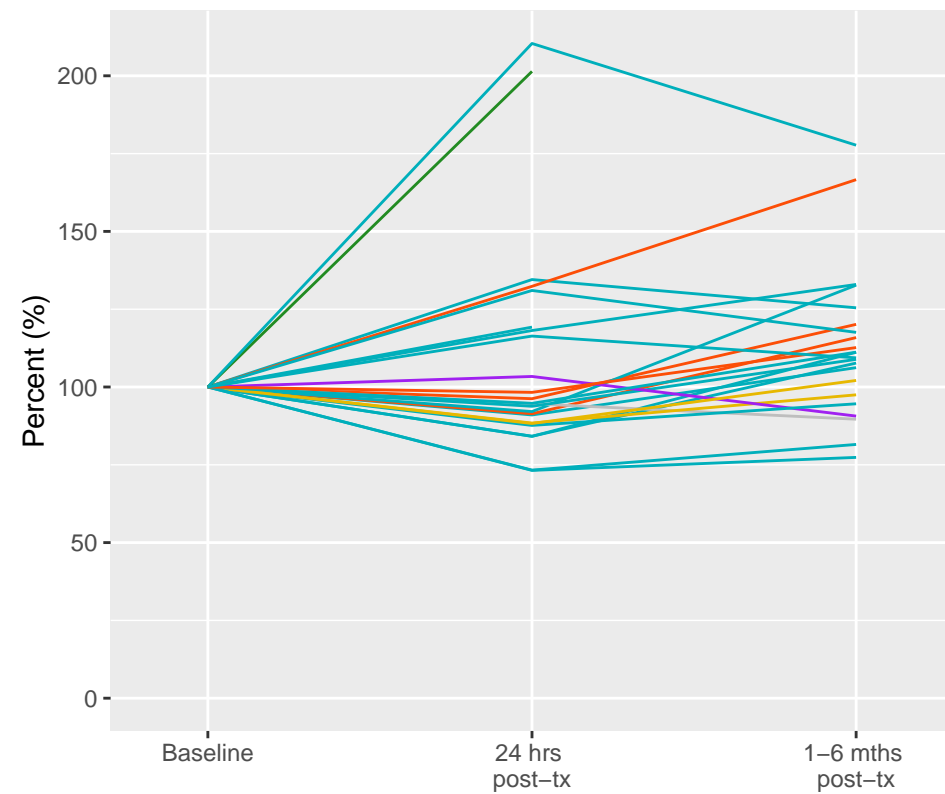

Histology

|             |            |       |           |                   |         |
|-------------|------------|-------|-----------|-------------------|---------|
| Chromophobe | Clear cell | Mixed | Papillary | TFE translocation | Unknown |
|-------------|------------|-------|-----------|-------------------|---------|

Uniprot ID: P04626, analyte: ERBB2

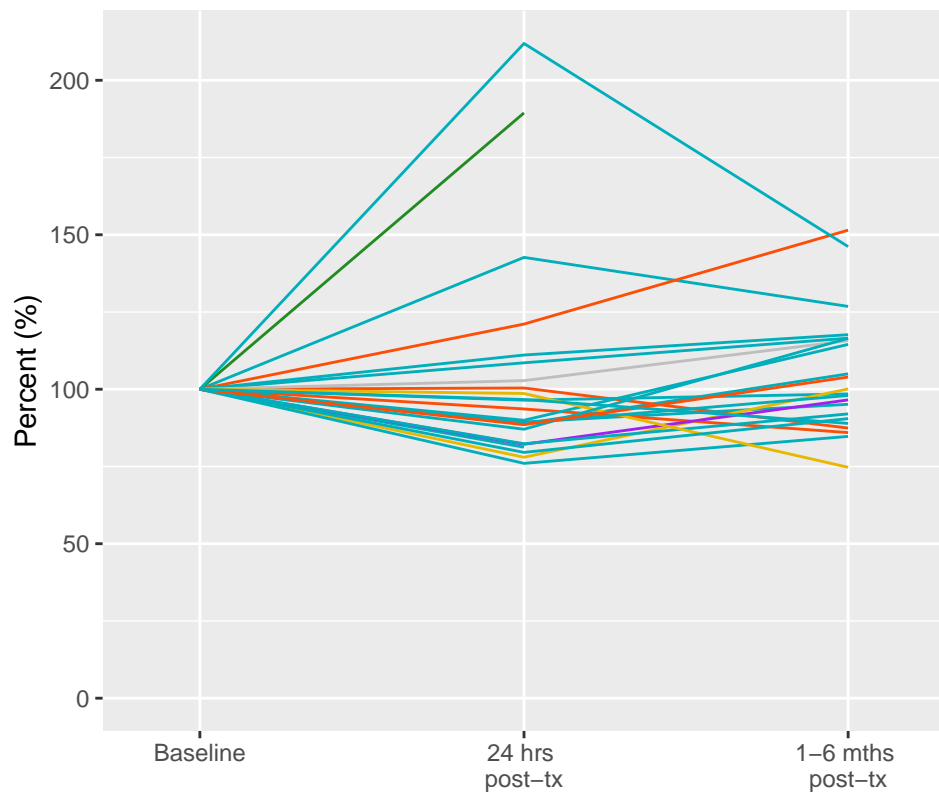

Uniprot ID: P21860, analyte: ERBB3

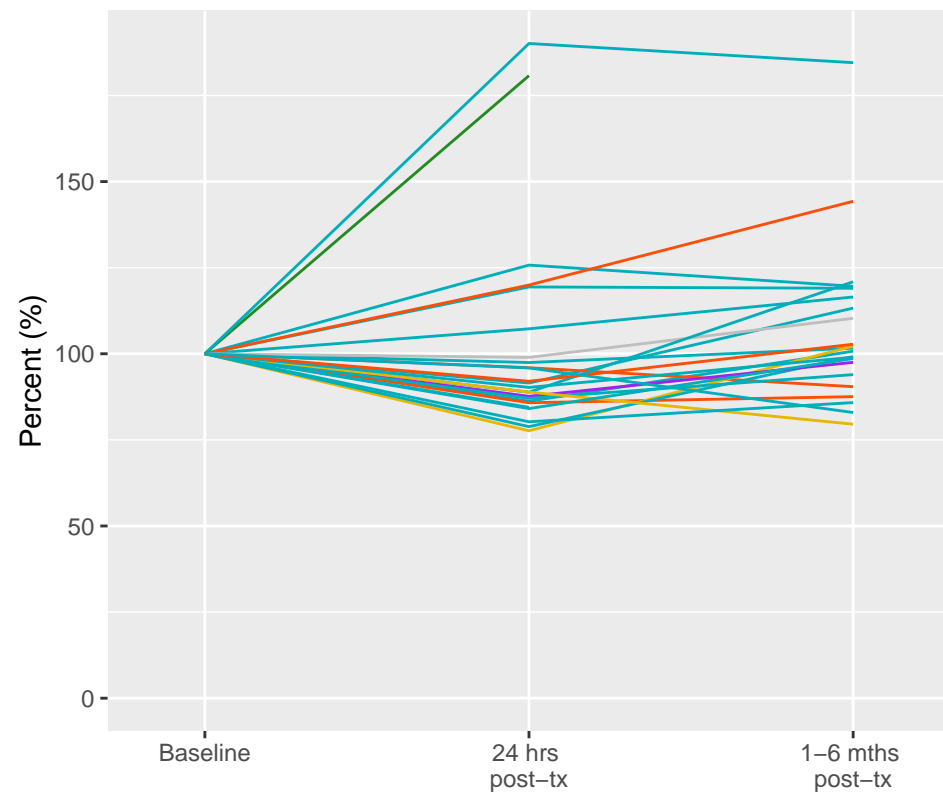

Uniprot ID: P21583, analyte: SCF

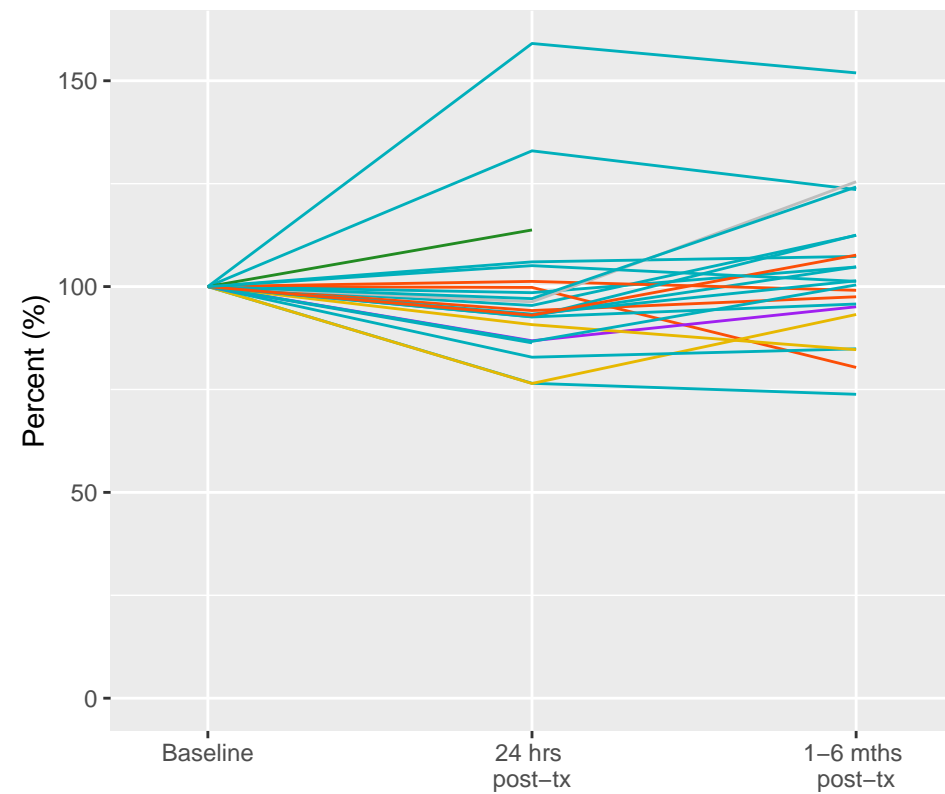

Histology

|             |            |       |           |                   |         |
|-------------|------------|-------|-----------|-------------------|---------|
| Chromophobe | Clear cell | Mixed | Papillary | TFE translocation | Unknown |
|-------------|------------|-------|-----------|-------------------|---------|



Uniprot ID: P09486, analyte: SPARC

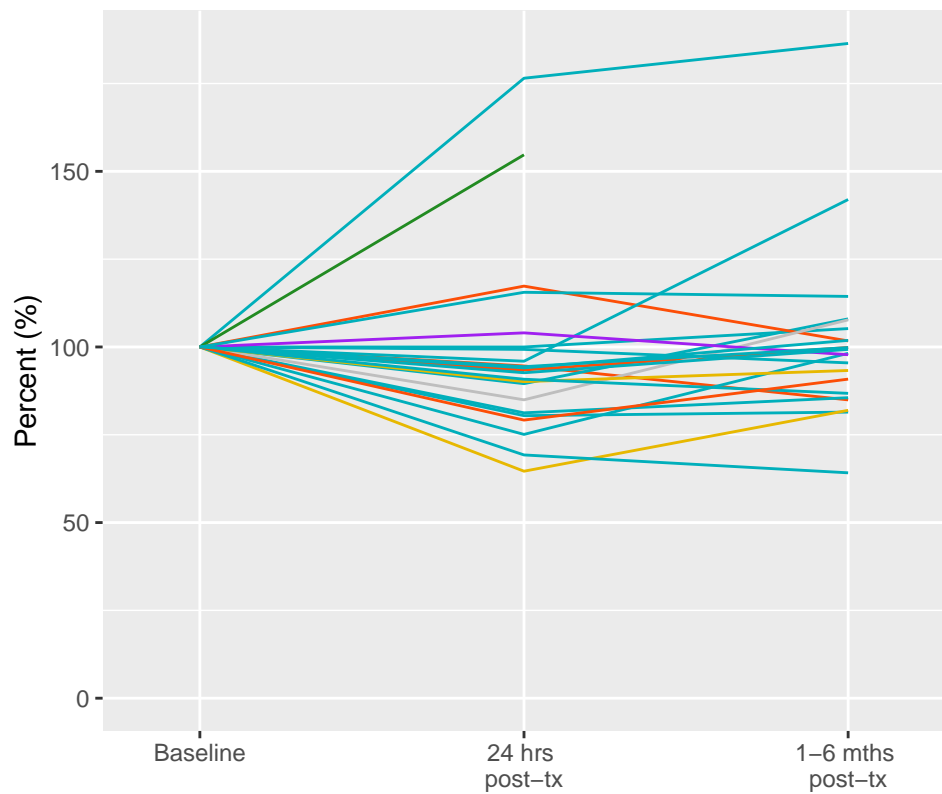Uniprot ID: P01135, analyte: TGF- $\alpha$ 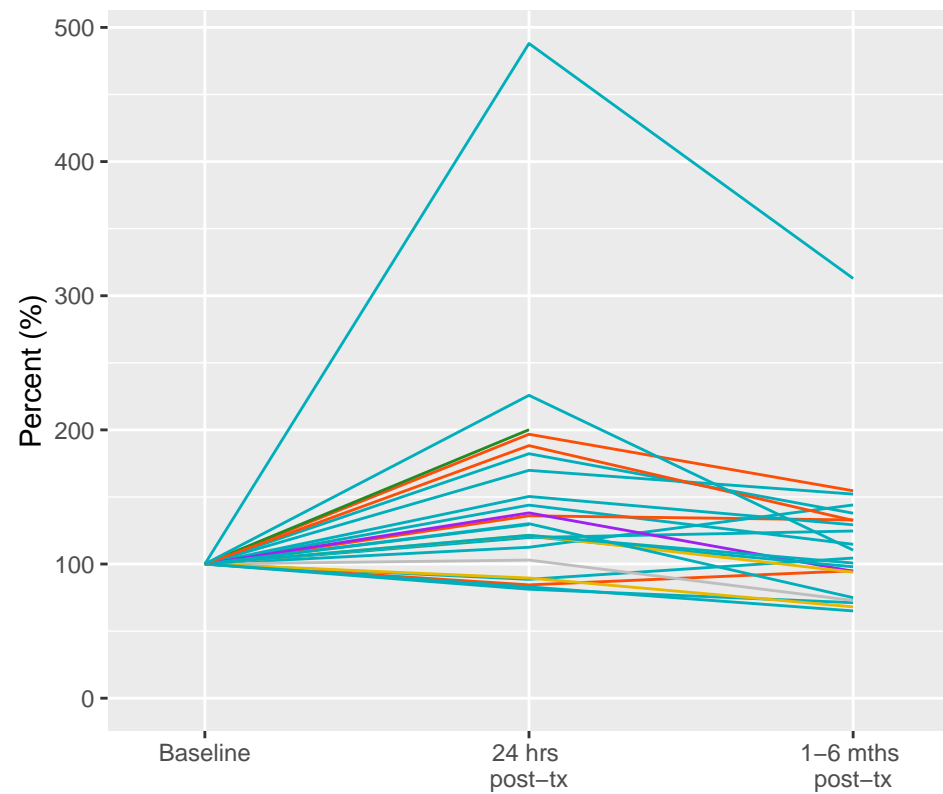

Uniprot ID: P09958, analyte: FURIN

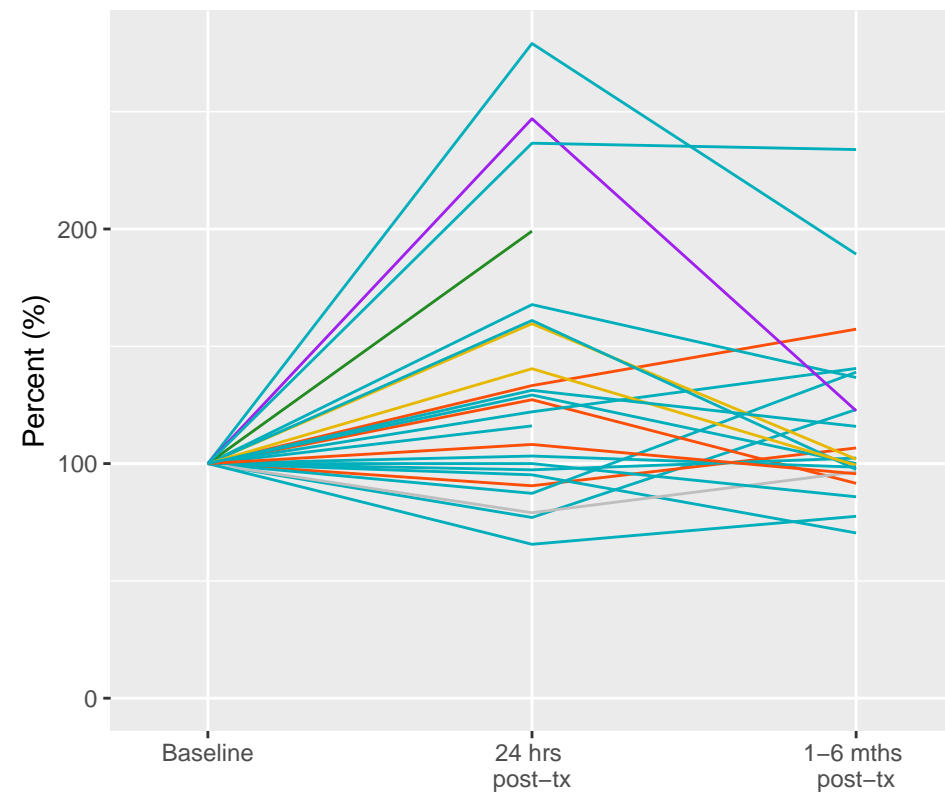

Histology

|             |            |       |           |                   |         |
|-------------|------------|-------|-----------|-------------------|---------|
| Chromophobe | Clear cell | Mixed | Papillary | TFE translocation | Unknown |
|-------------|------------|-------|-----------|-------------------|---------|

Uniprot ID: O00622, analyte: CYR61

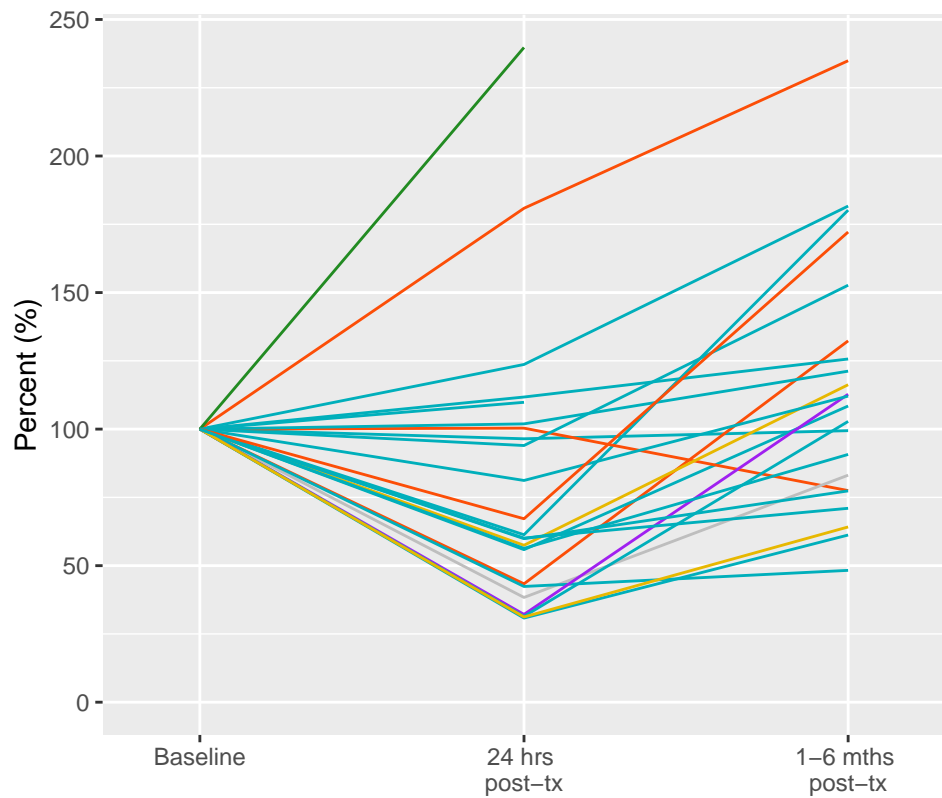

Uniprot ID: Q9P0G3, analyte: hK14

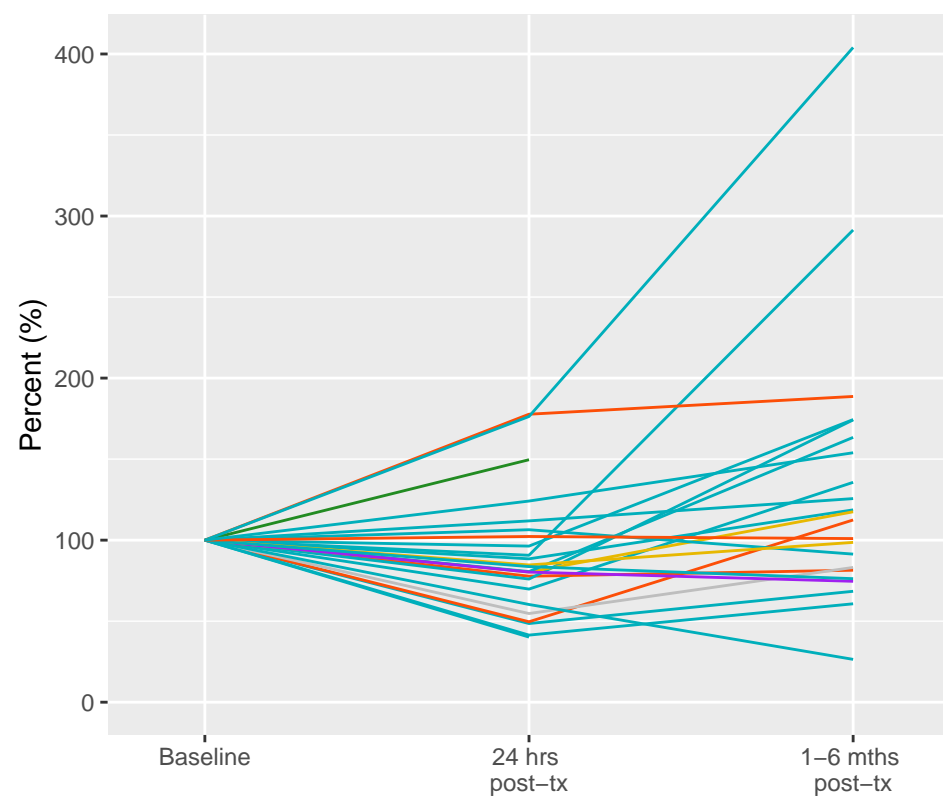

Uniprot ID: Q13158, analyte: FADD

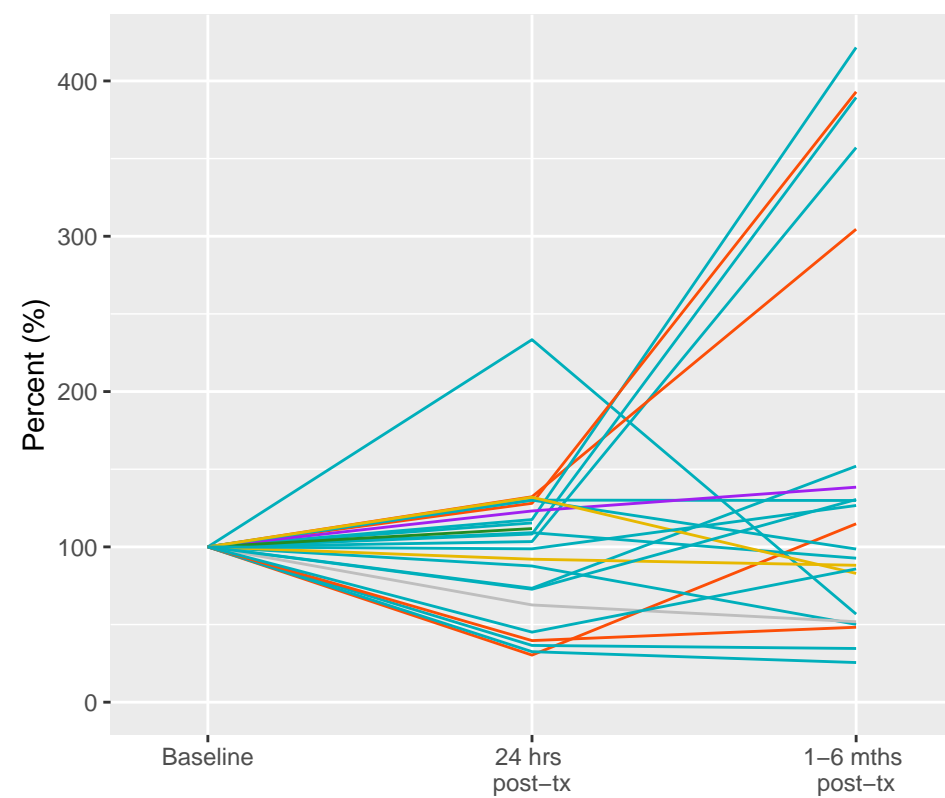

Histology

|             |            |       |           |                   |         |
|-------------|------------|-------|-----------|-------------------|---------|
| Chromophobe | Clear cell | Mixed | Papillary | TFE translocation | Unknown |
|-------------|------------|-------|-----------|-------------------|---------|

Uniprot ID: P50579, analyte: MetAP 2

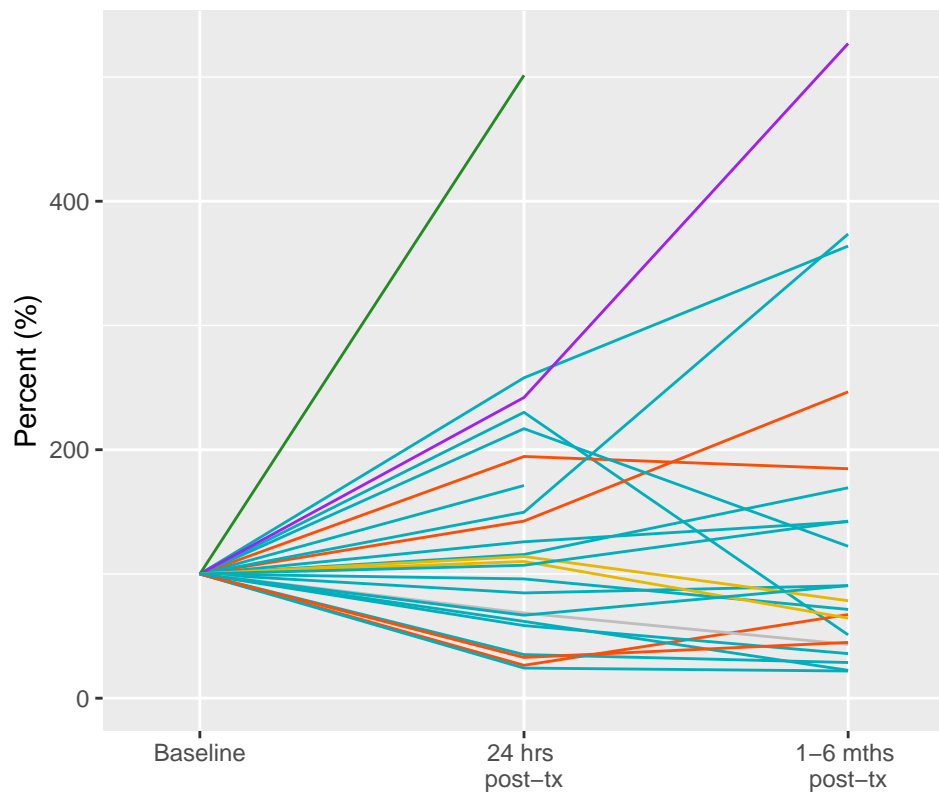

Uniprot ID: Q96NY8, analyte: PVRL4

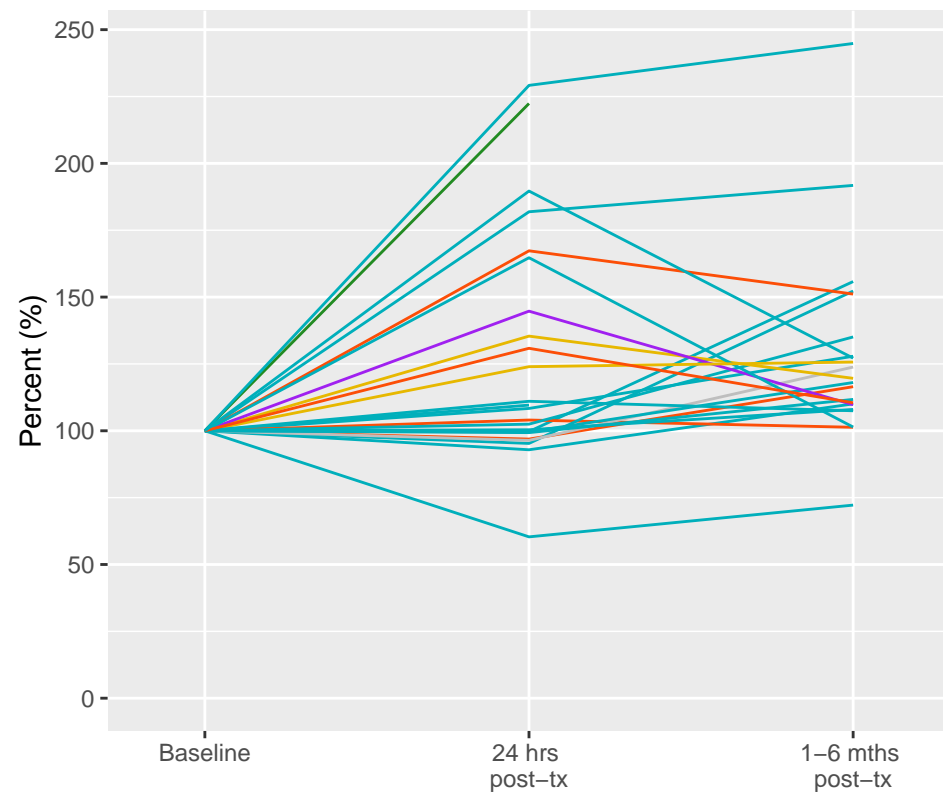

Uniprot ID: P29317, analyte: EPHA2

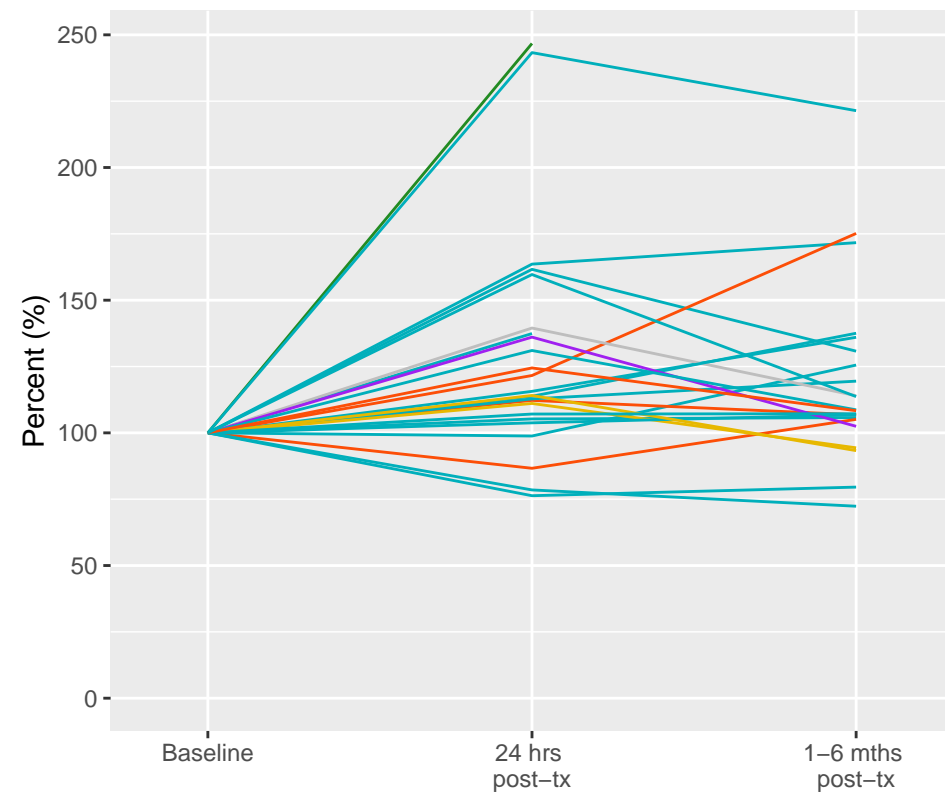

Histology

|             |            |       |           |                   |         |
|-------------|------------|-------|-----------|-------------------|---------|
| Chromophobe | Clear cell | Mixed | Papillary | TFE translocation | Unknown |
|-------------|------------|-------|-----------|-------------------|---------|

Uniprot ID: P18084, analyte: ITGB5

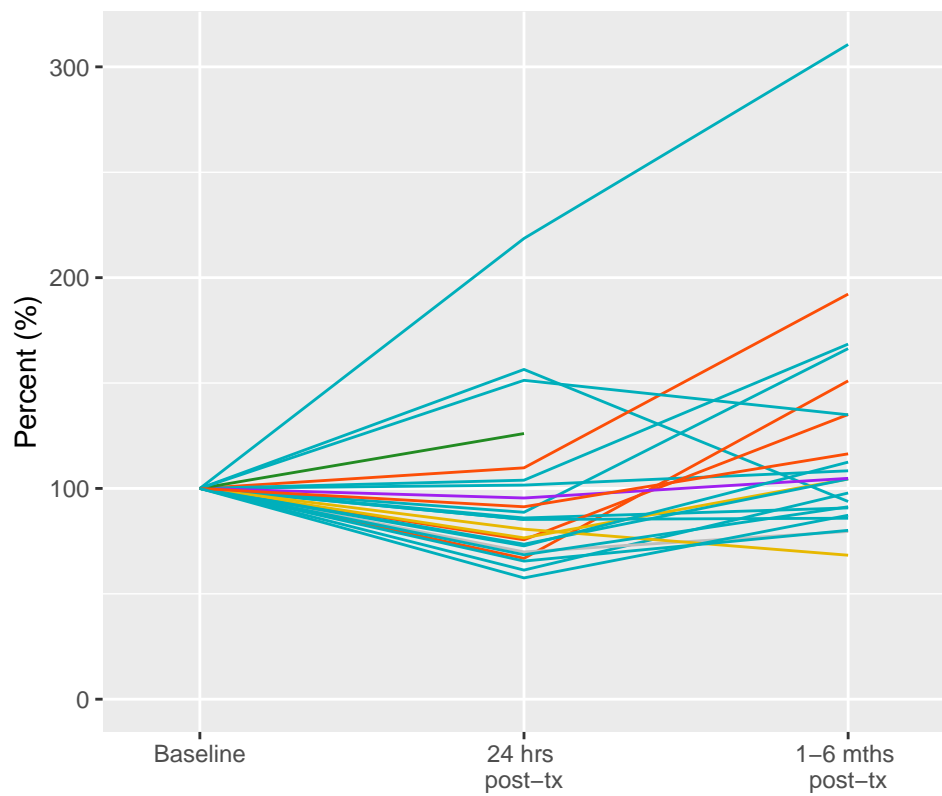

Uniprot ID: Q9BYH1, analyte: SEZ6L

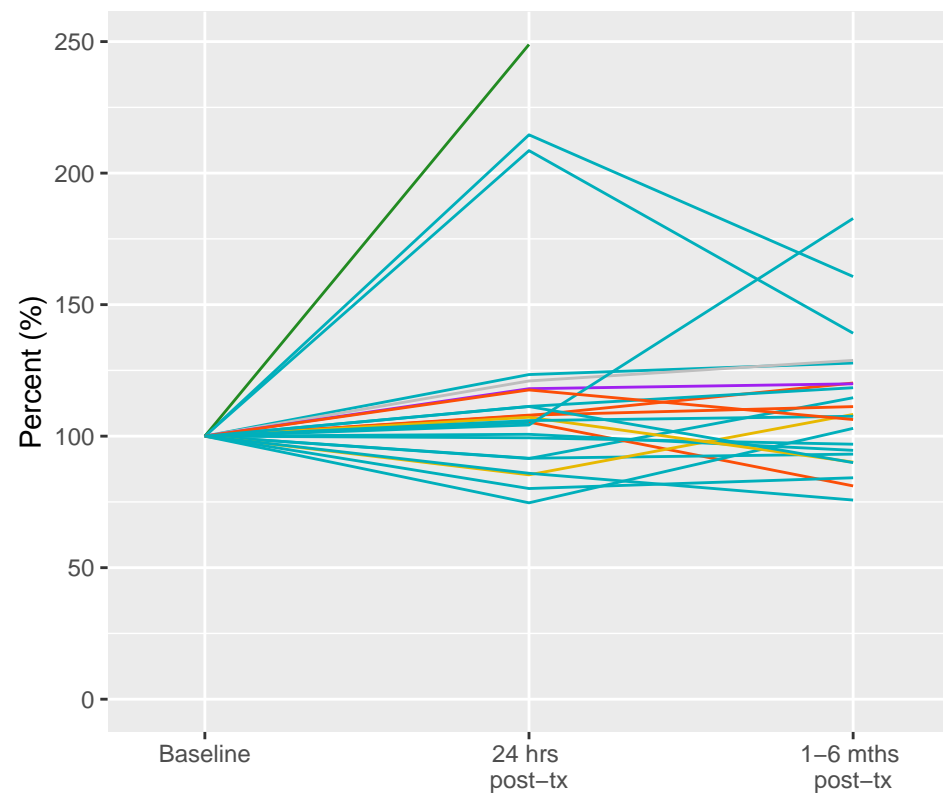

Uniprot ID: Q14956, analyte: GPNMB

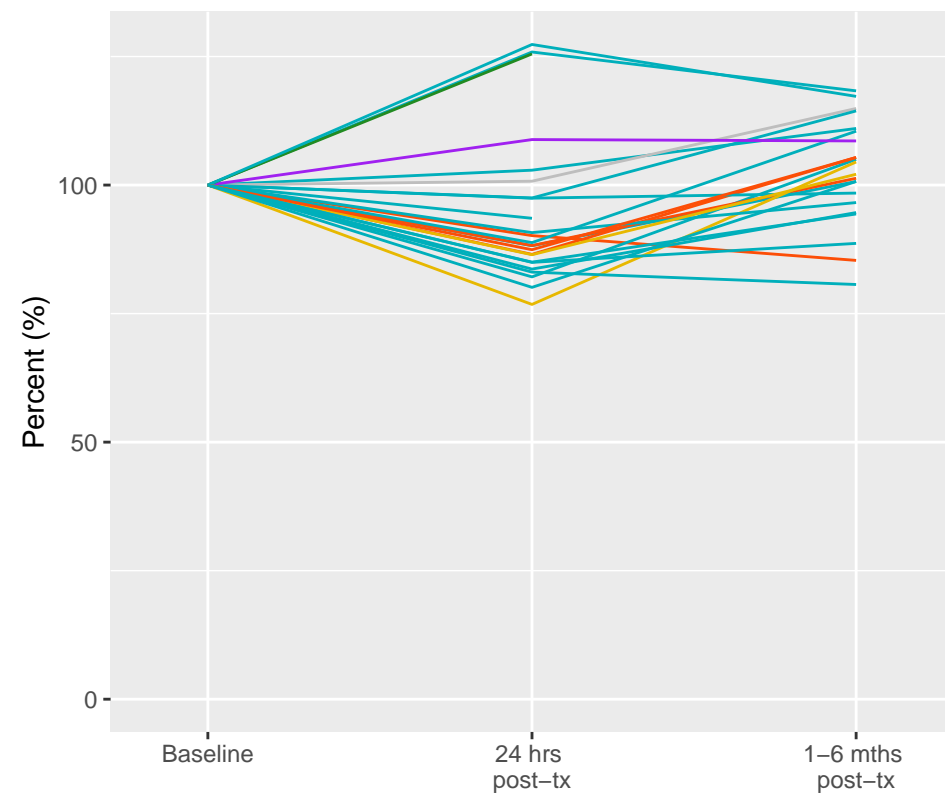

Histology

|             |            |       |           |                   |         |
|-------------|------------|-------|-----------|-------------------|---------|
| Chromophobe | Clear cell | Mixed | Papillary | TFE translocation | Unknown |
|-------------|------------|-------|-----------|-------------------|---------|

Uniprot ID: Q16674, analyte: MIA

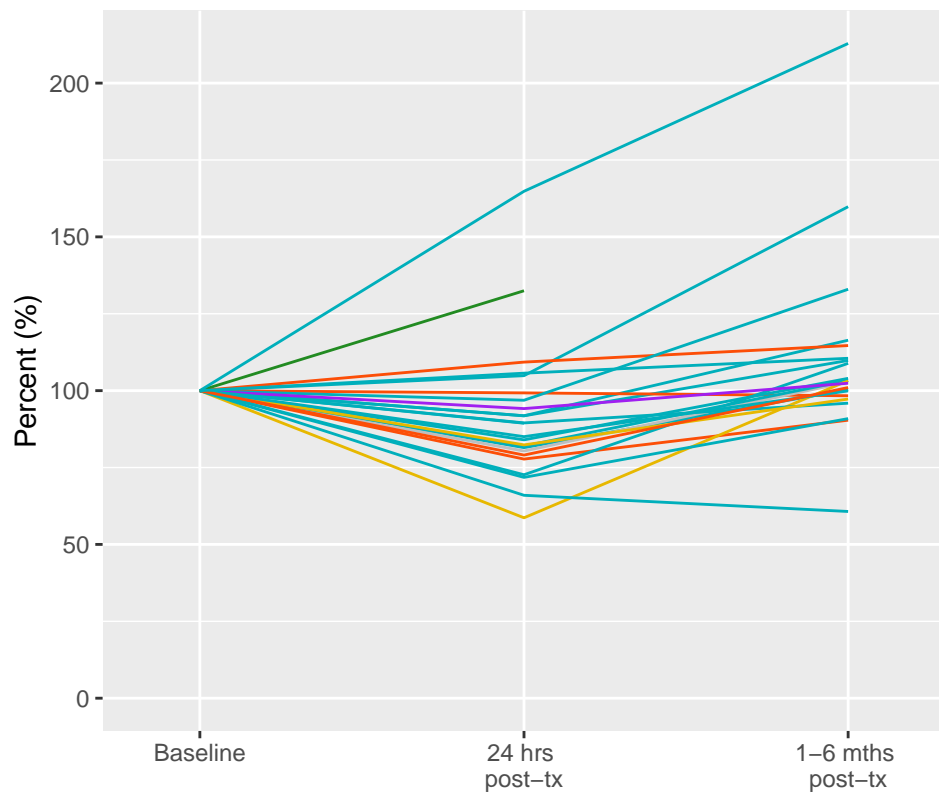

Uniprot ID: O60911, analyte: CTSV

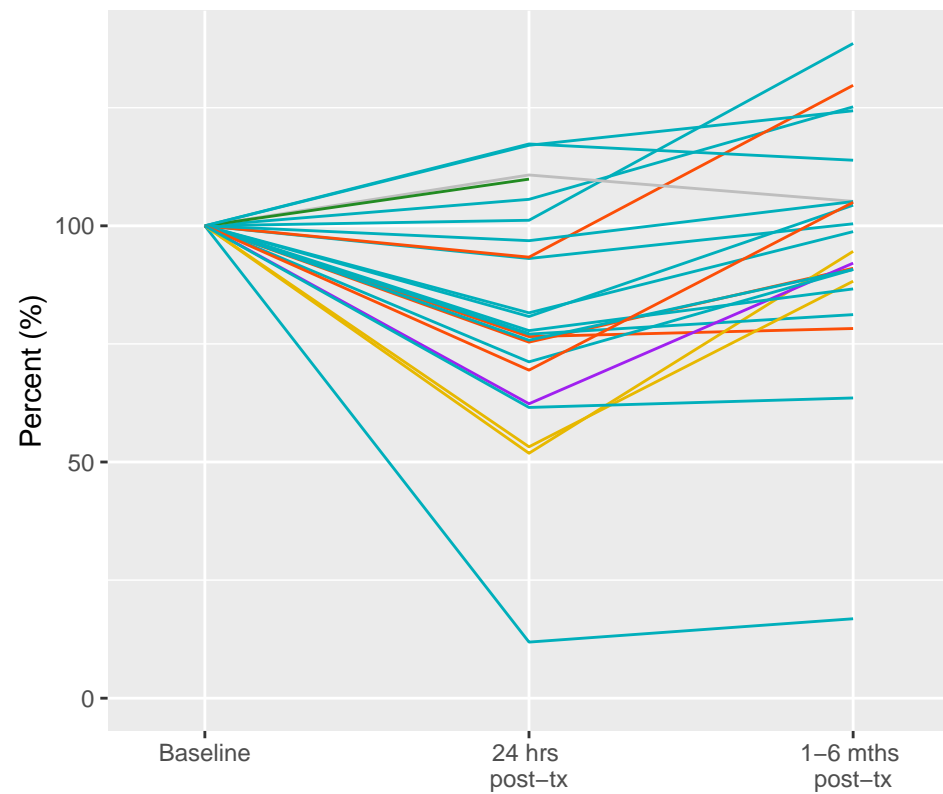

Uniprot ID: O43895, analyte: XPNPEP2

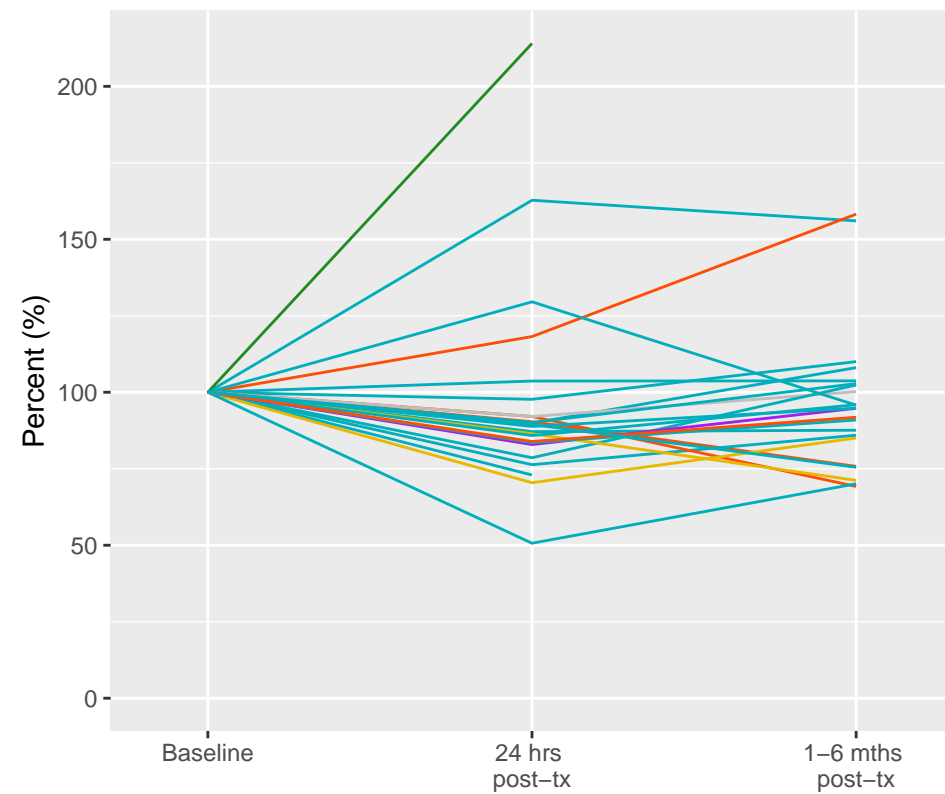

Histology

|             |            |       |           |                   |         |
|-------------|------------|-------|-----------|-------------------|---------|
| Chromophobe | Clear cell | Mixed | Papillary | TFE translocation | Unknown |
|-------------|------------|-------|-----------|-------------------|---------|

Uniprot ID: Q15303, analyte: ERBB4

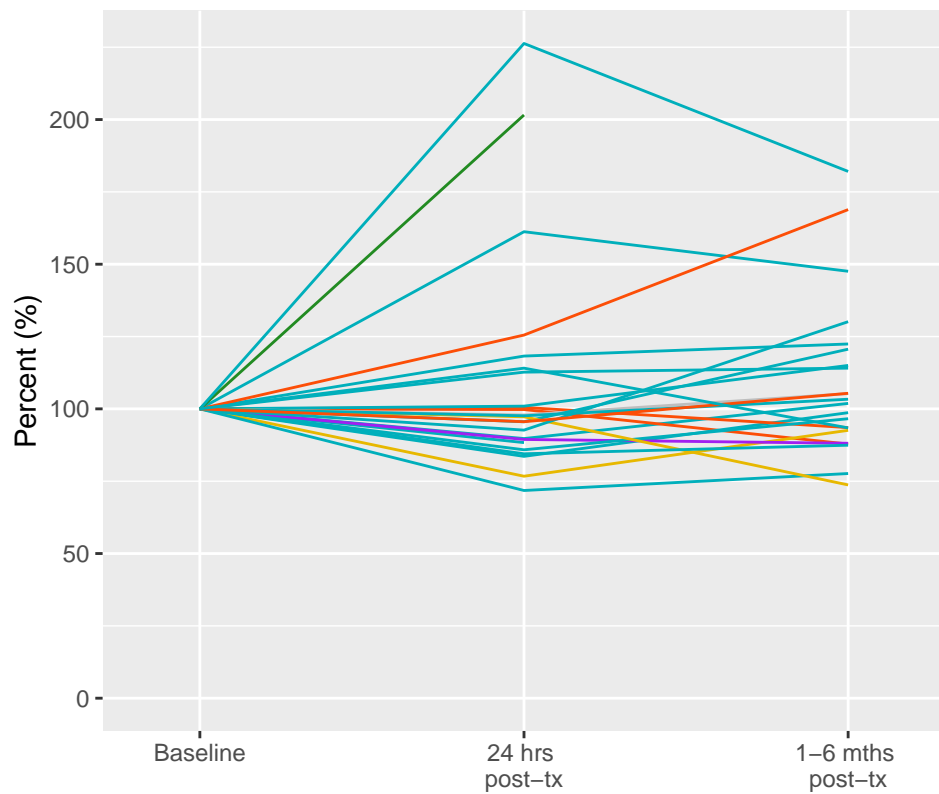

Uniprot ID: P78325, analyte: ADAM 8

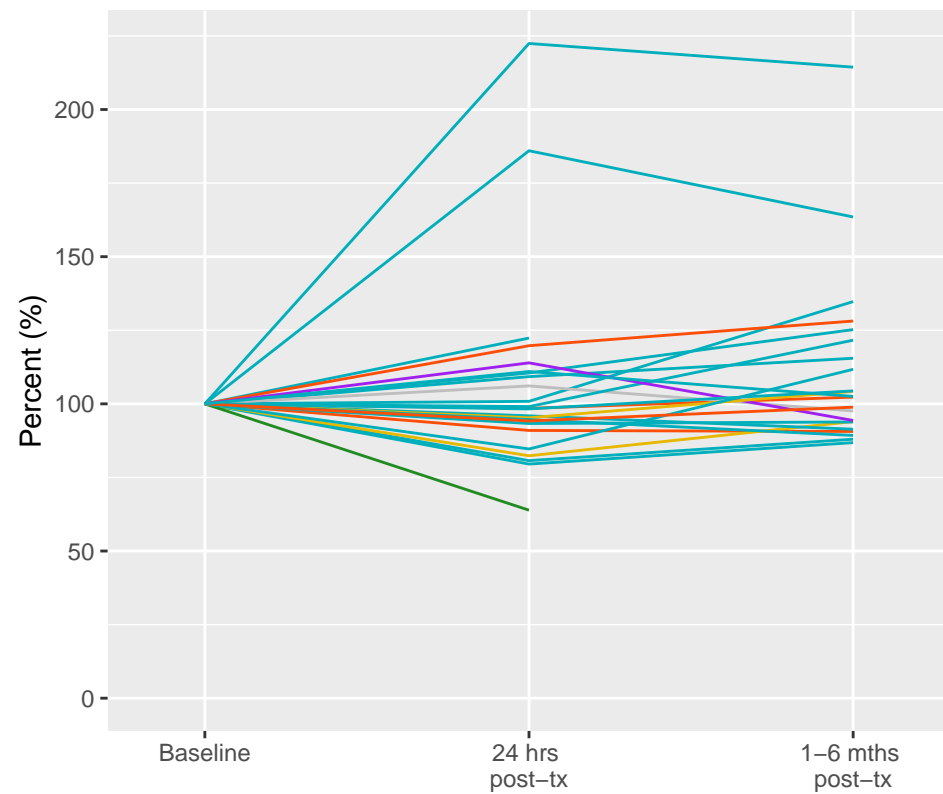

Uniprot ID: P21589, analyte: 5'-NT

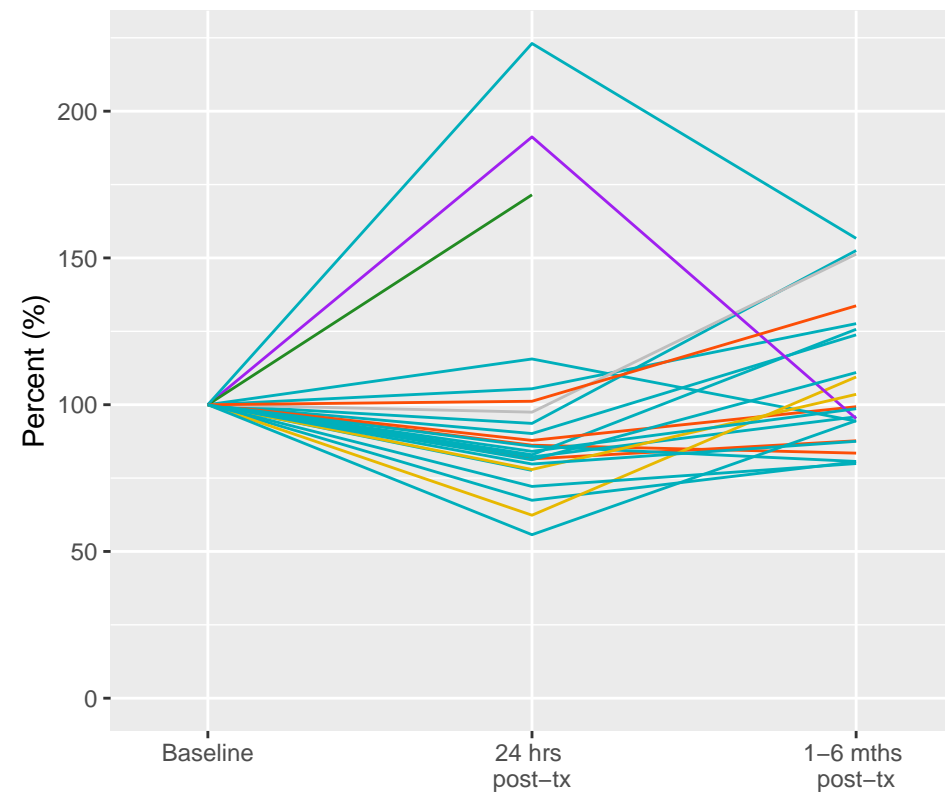

Histology

|             |            |       |           |                   |         |
|-------------|------------|-------|-----------|-------------------|---------|
| Chromophobe | Clear cell | Mixed | Papillary | TFE translocation | Unknown |
|-------------|------------|-------|-----------|-------------------|---------|

Uniprot ID: P38936, analyte: CDKN1A

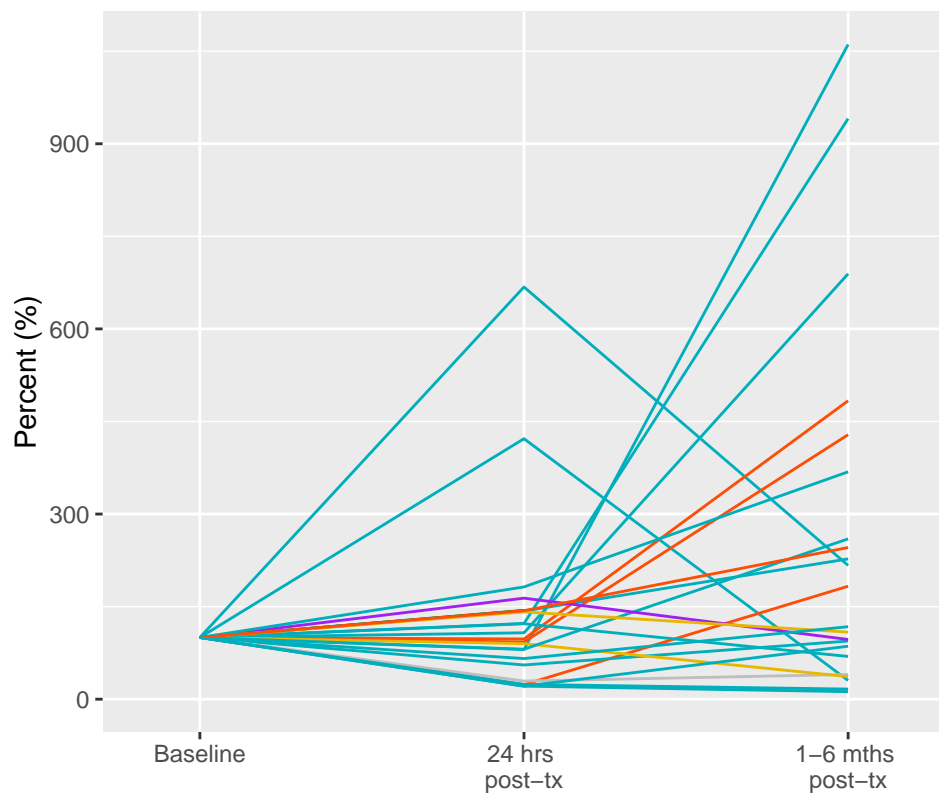

Uniprot ID: O00548, analyte: DLL1

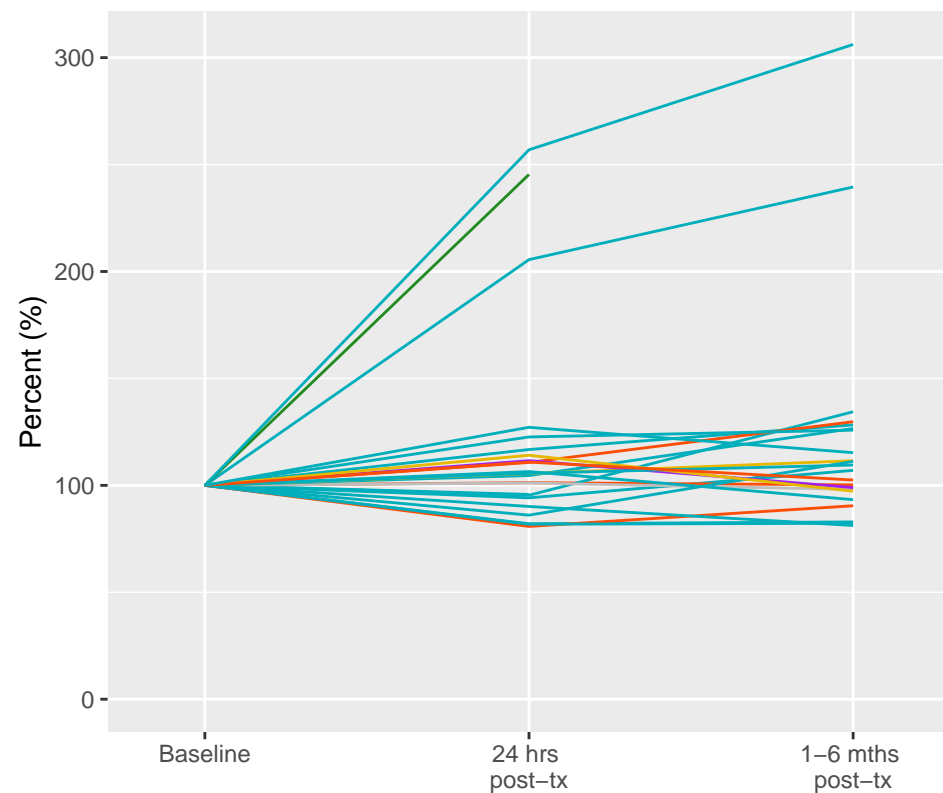

Uniprot ID: P21741, analyte: MK

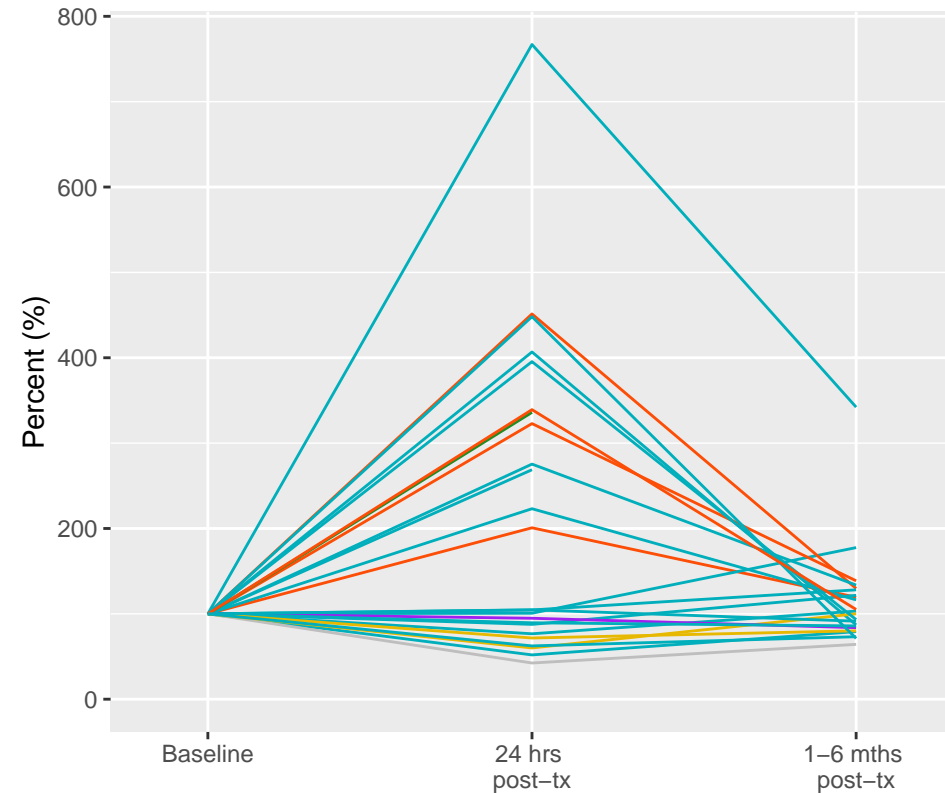

Histology

|             |            |       |           |                   |         |
|-------------|------------|-------|-----------|-------------------|---------|
| Chromophobe | Clear cell | Mixed | Papillary | TFE translocation | Unknown |
|-------------|------------|-------|-----------|-------------------|---------|

Uniprot ID: P00519, analyte: ABL1

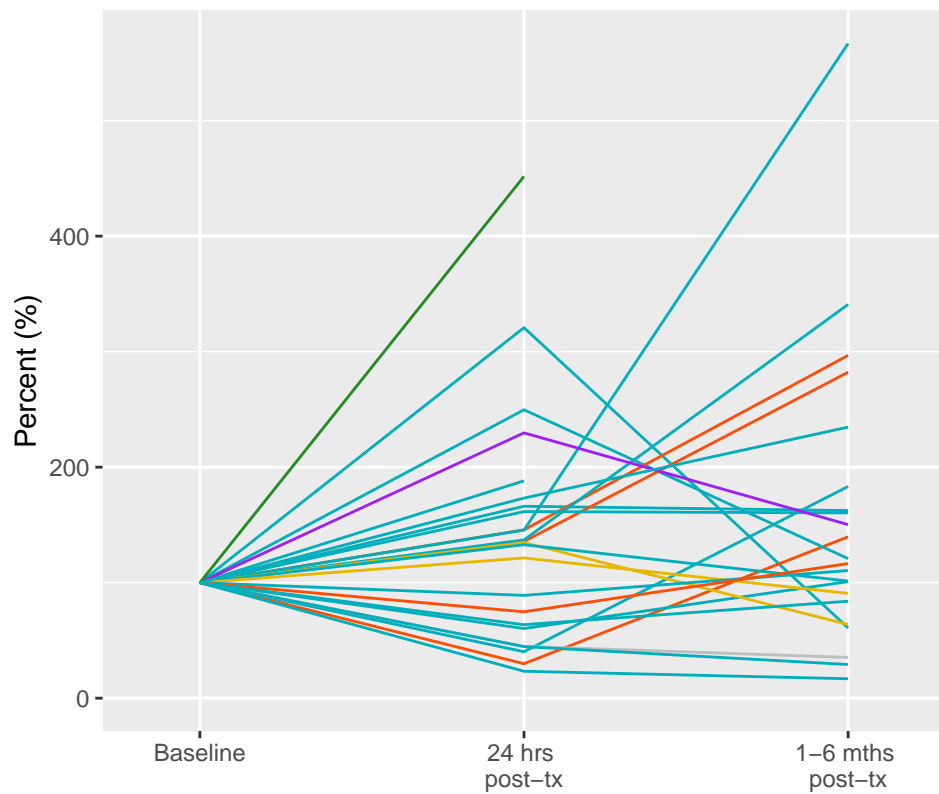

Uniprot ID: Q14512, analyte: FGF-BP1

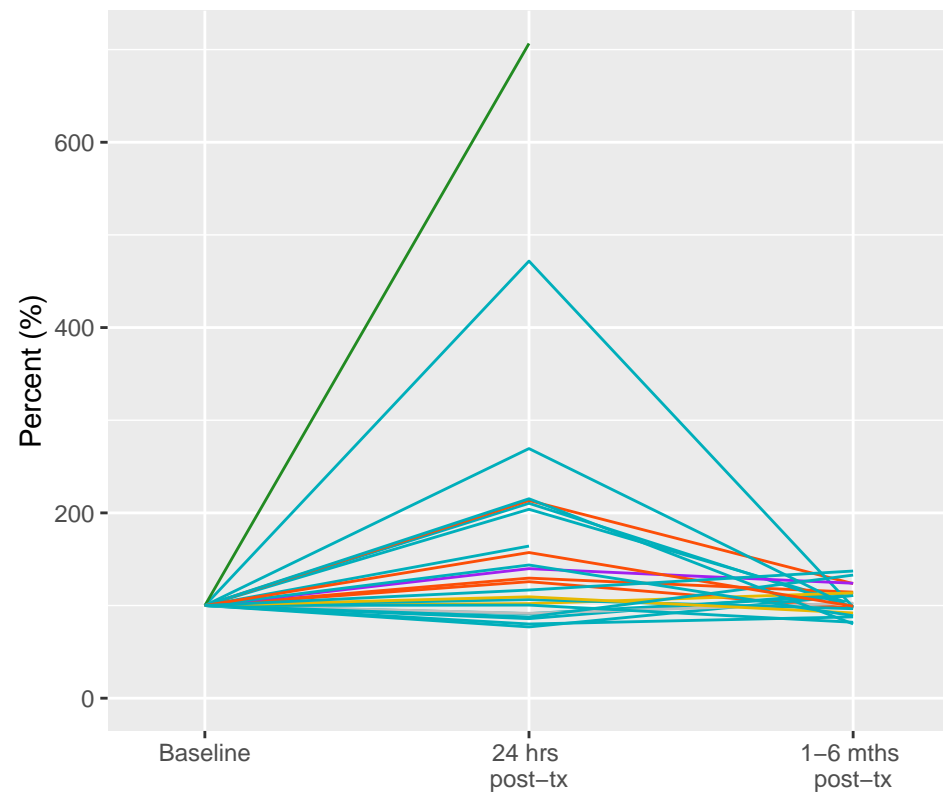

Uniprot ID: O15455, analyte: TLR3

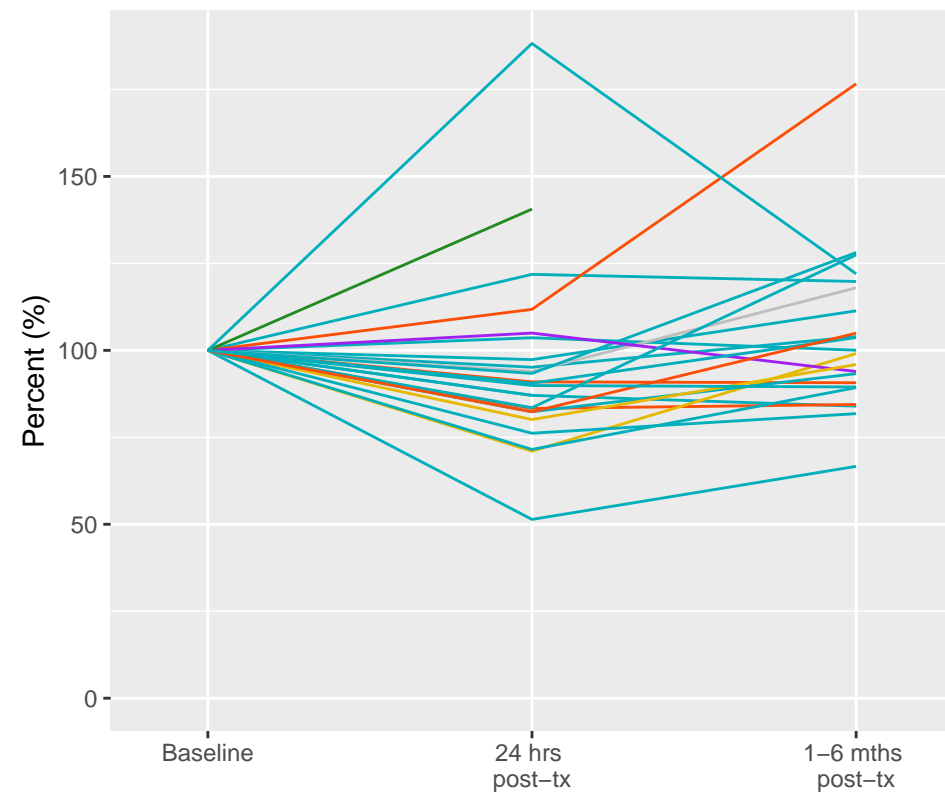

Histology

|             |            |       |           |                   |         |
|-------------|------------|-------|-----------|-------------------|---------|
| Chromophobe | Clear cell | Mixed | Papillary | TFE translocation | Unknown |
|-------------|------------|-------|-----------|-------------------|---------|



Uniprot ID: P07948, analyte: LYN

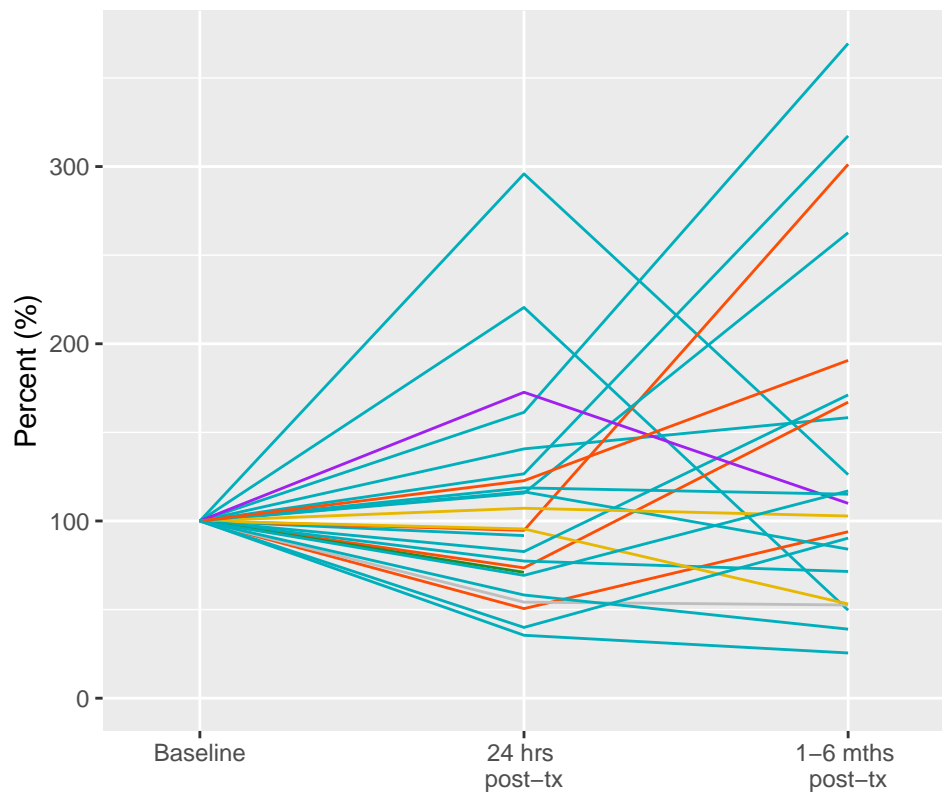

Uniprot ID: P07949, analyte: RET

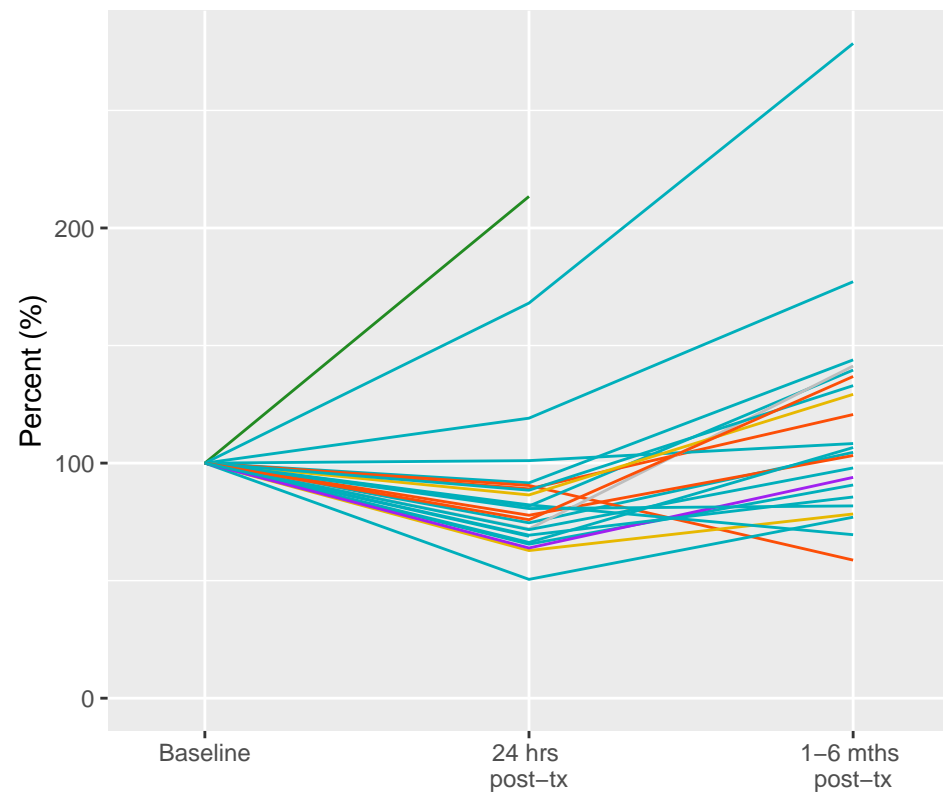

Uniprot ID: P08670, analyte: VIM

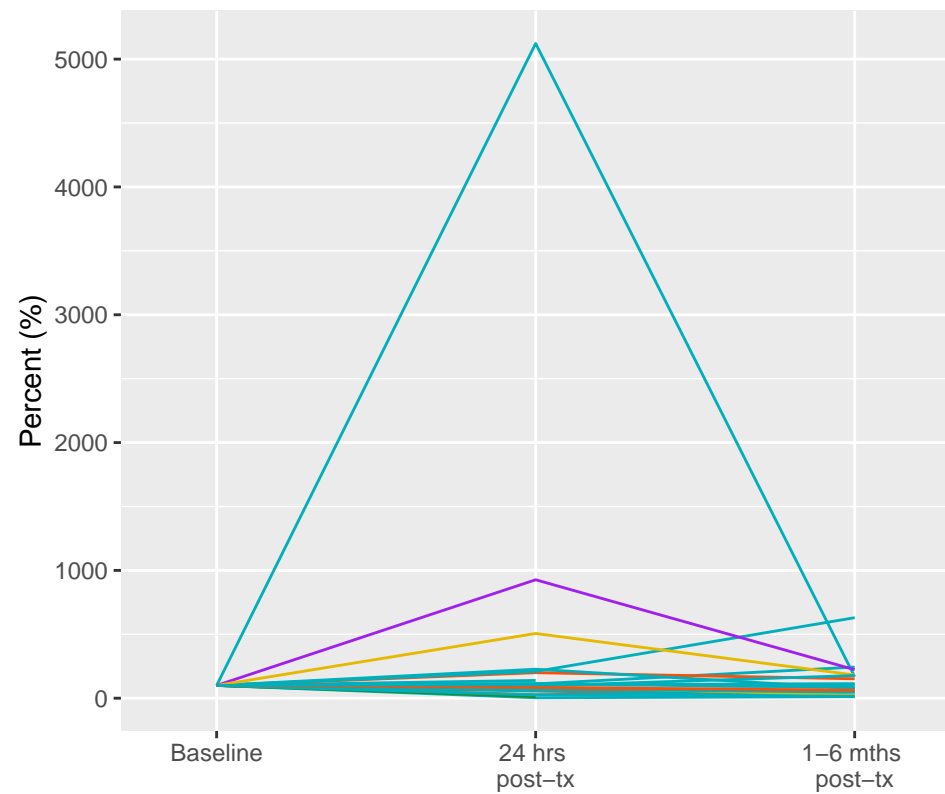

Histology

|             |            |       |           |                   |         |
|-------------|------------|-------|-----------|-------------------|---------|
| Chromophobe | Clear cell | Mixed | Papillary | TFE translocation | Unknown |
|-------------|------------|-------|-----------|-------------------|---------|

Uniprot ID: Q9NS68, analyte: TNFRSF19

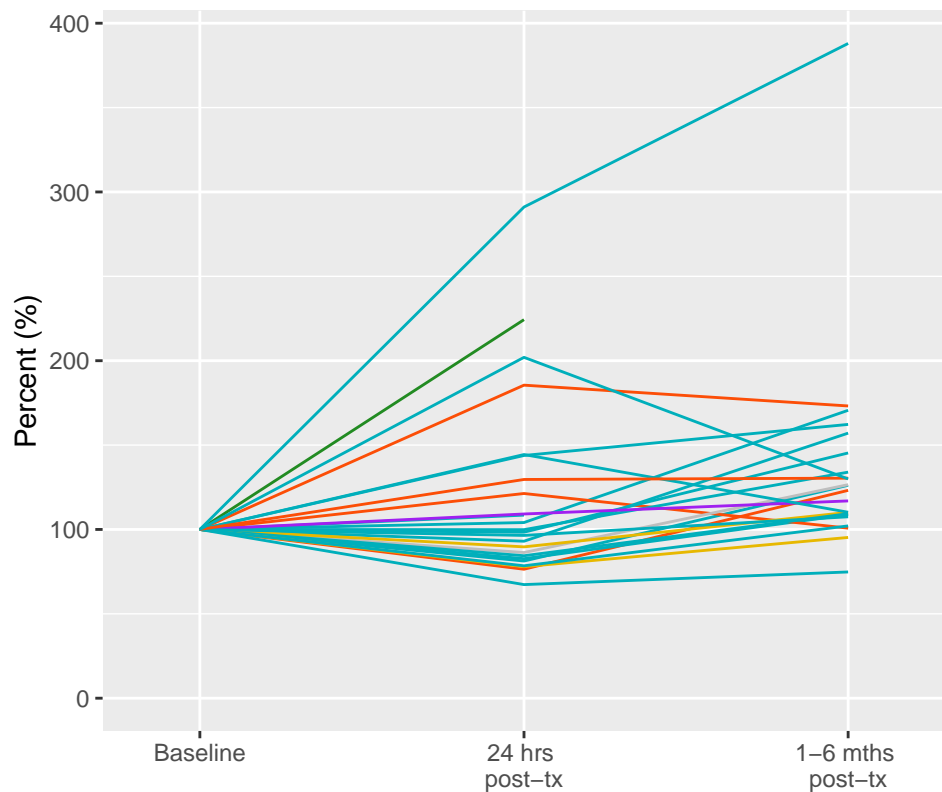

Uniprot ID: Q9UBG3, analyte: CRNN

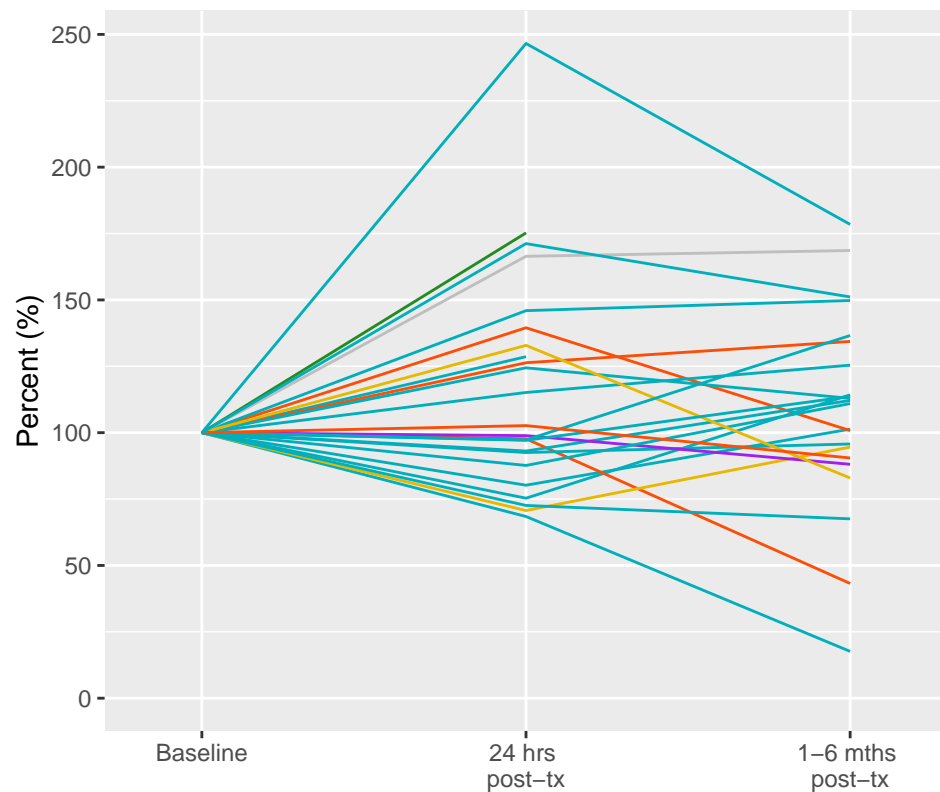

Uniprot ID: P56279, analyte: TCL1A

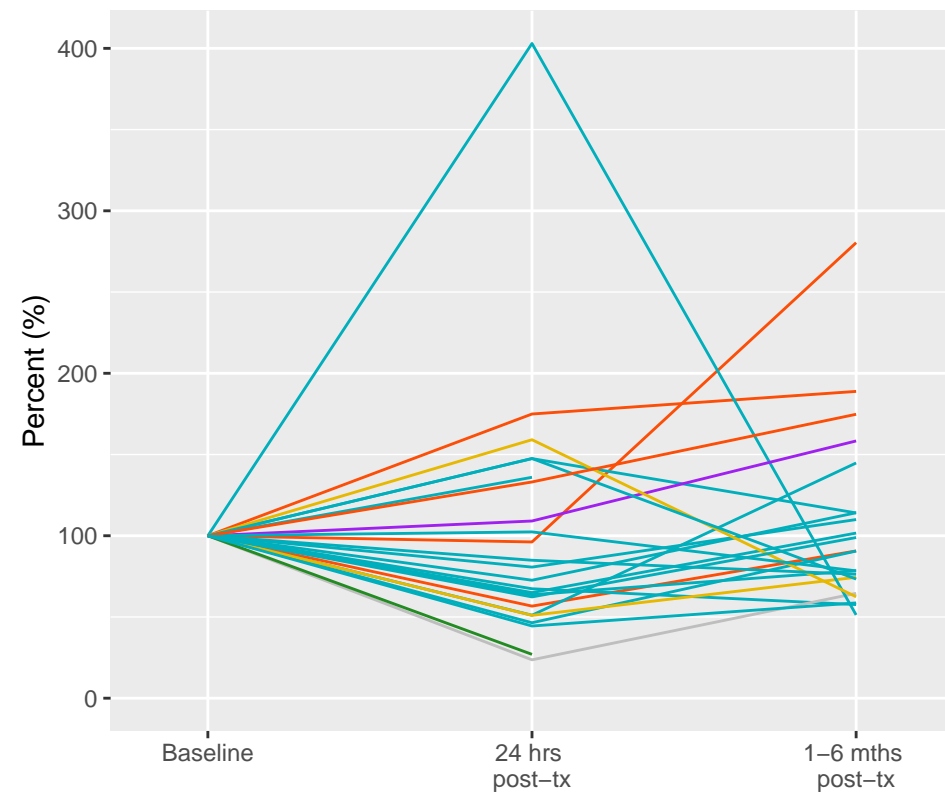

Histology

|             |            |       |           |                   |         |
|-------------|------------|-------|-----------|-------------------|---------|
| Chromophobe | Clear cell | Mixed | Papillary | TFE translocation | Unknown |
|-------------|------------|-------|-----------|-------------------|---------|

Uniprot ID: O95971, analyte: CD160

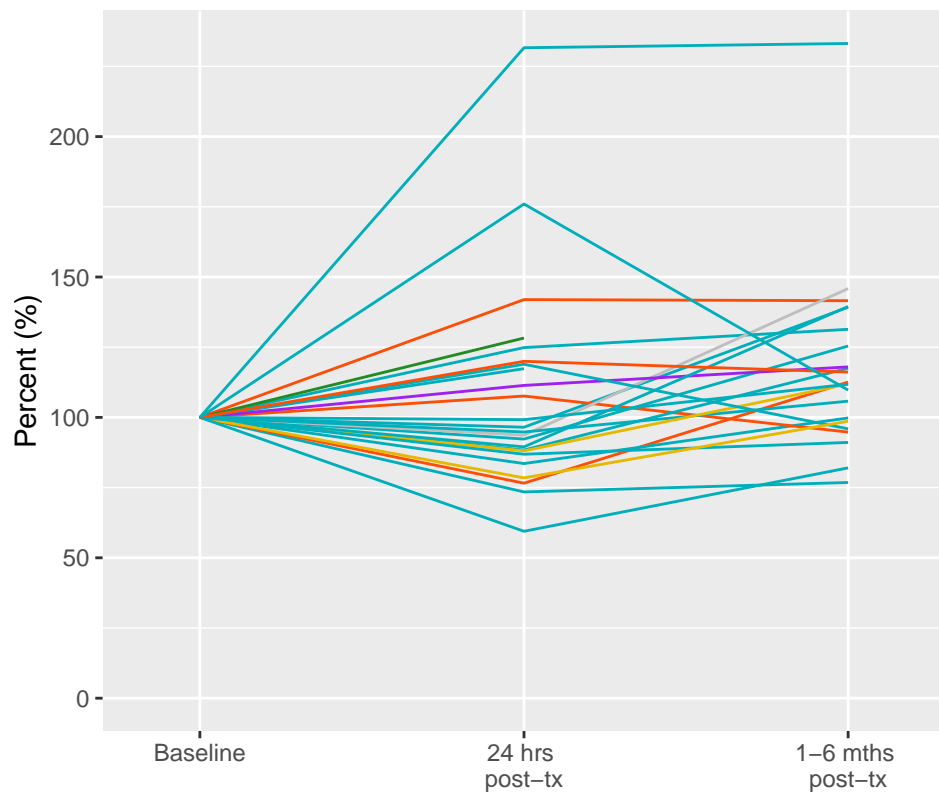

Uniprot ID: O95388, analyte: WISP-1

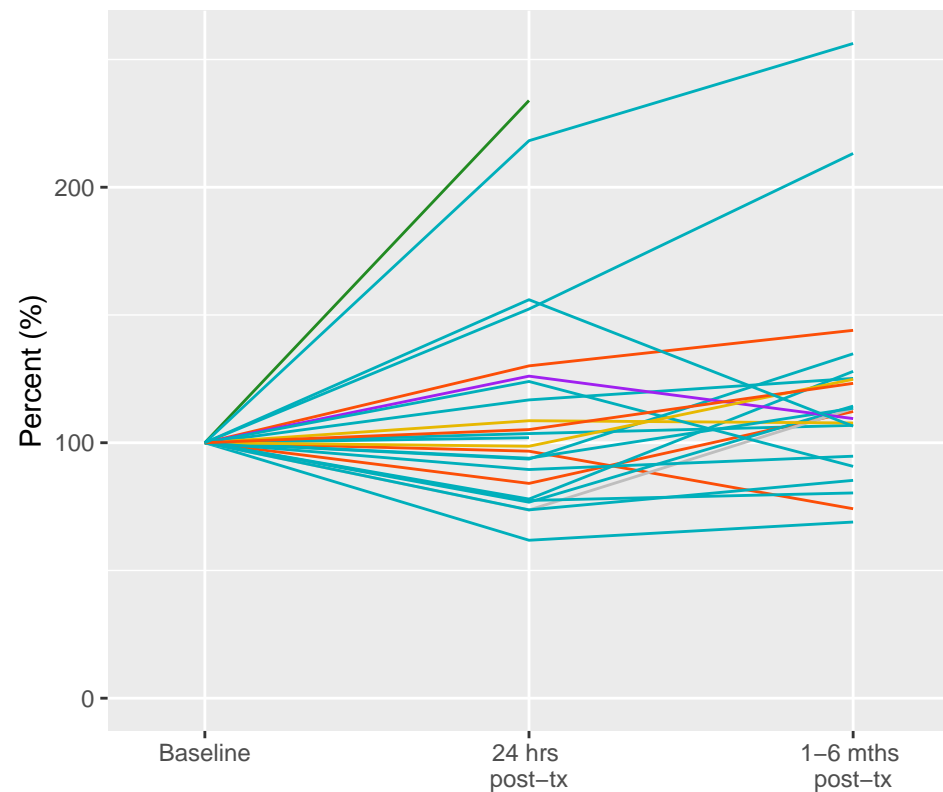

Uniprot ID: Q6UXB2, analyte: CXL17

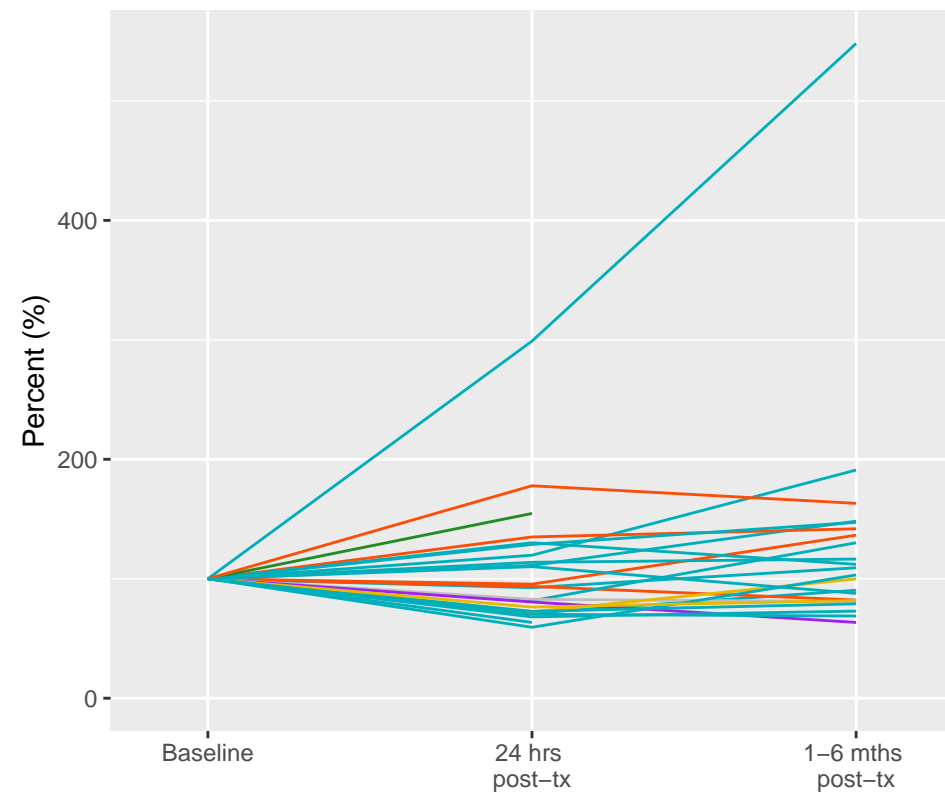

Histology

|             |            |       |           |                   |         |
|-------------|------------|-------|-----------|-------------------|---------|
| Chromophobe | Clear cell | Mixed | Papillary | TFE translocation | Unknown |
|-------------|------------|-------|-----------|-------------------|---------|

Uniprot ID: P01298, analyte: PPY

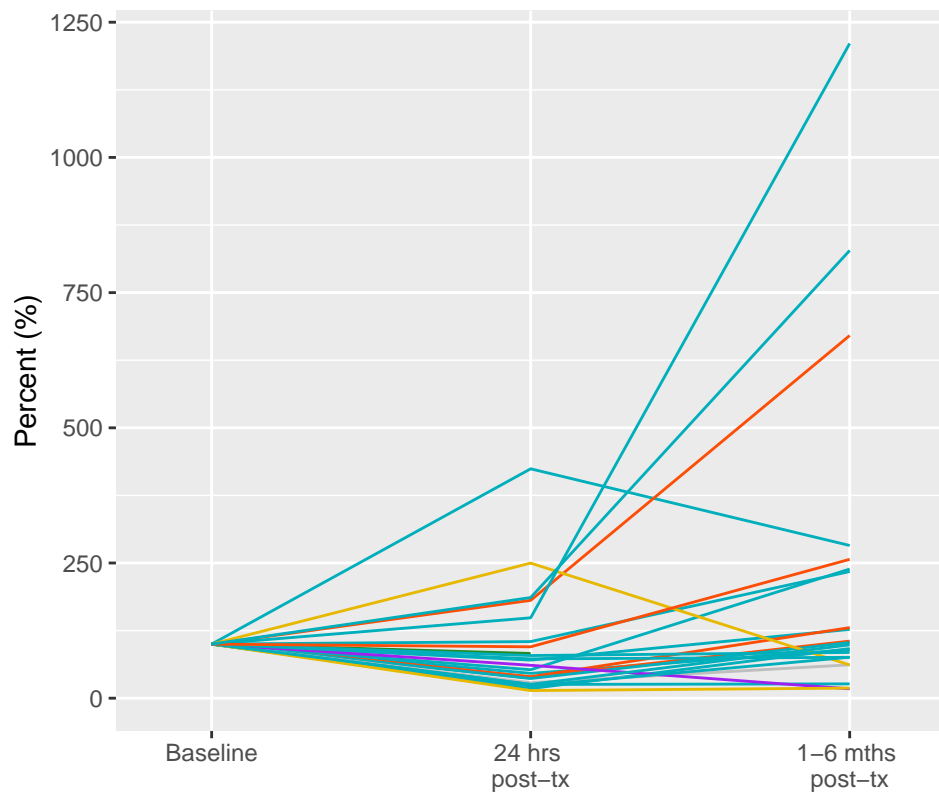

Uniprot ID: P31949, analyte: S100A11

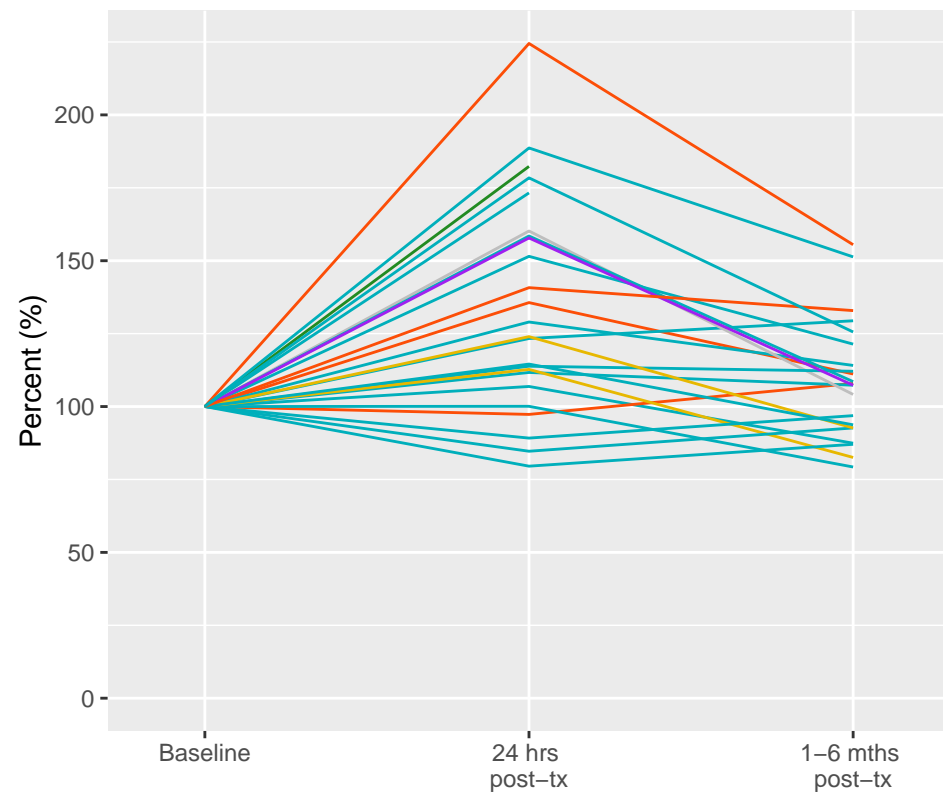

Uniprot ID: P15514, analyte: AREG

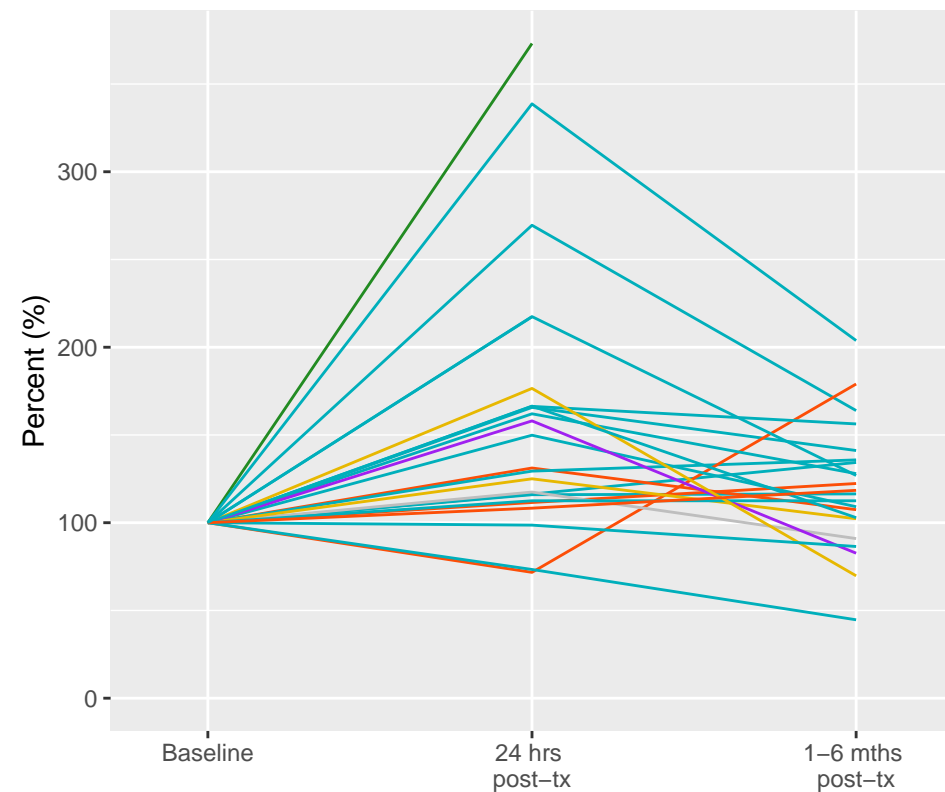

Histology

|             |            |       |           |                   |         |
|-------------|------------|-------|-----------|-------------------|---------|
| Chromophobe | Clear cell | Mixed | Papillary | TFE translocation | Unknown |
|-------------|------------|-------|-----------|-------------------|---------|

Uniprot ID: Q9NQ30, analyte: ESM-1

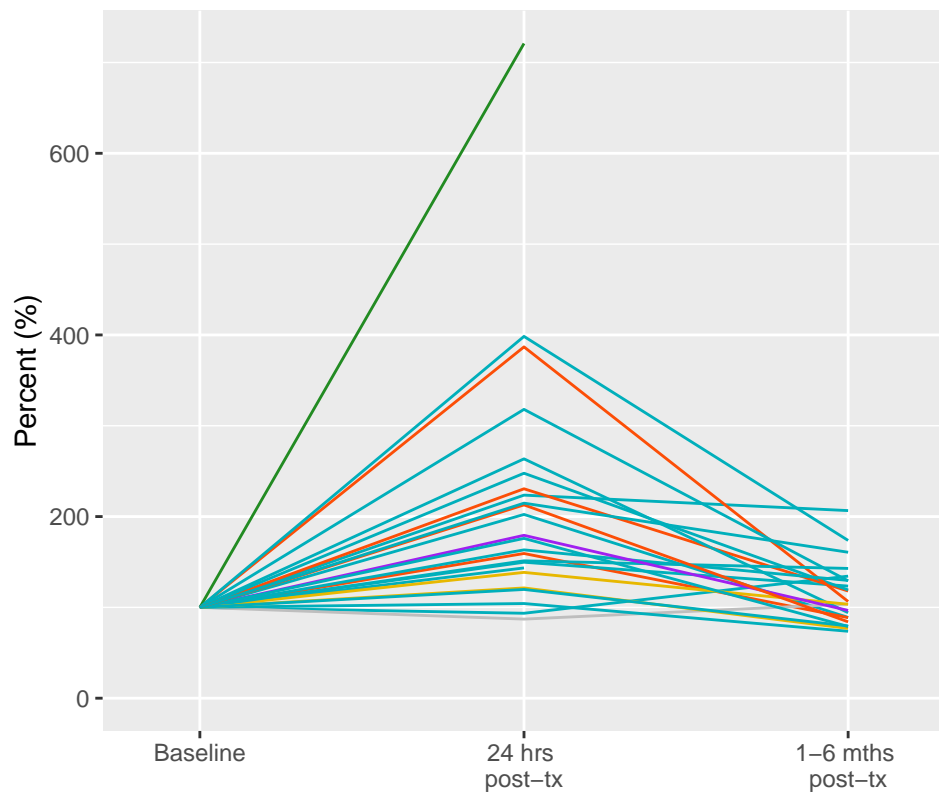

Uniprot ID: Q9UJ71, analyte: CD207

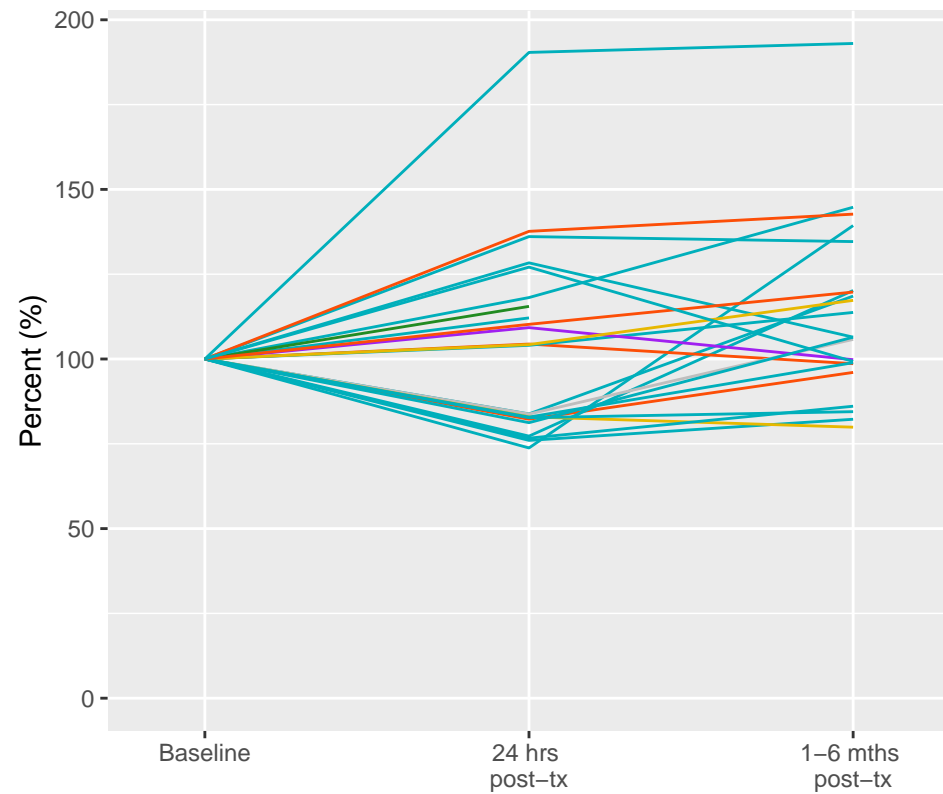

Uniprot ID: Q14508, analyte: WFDC2

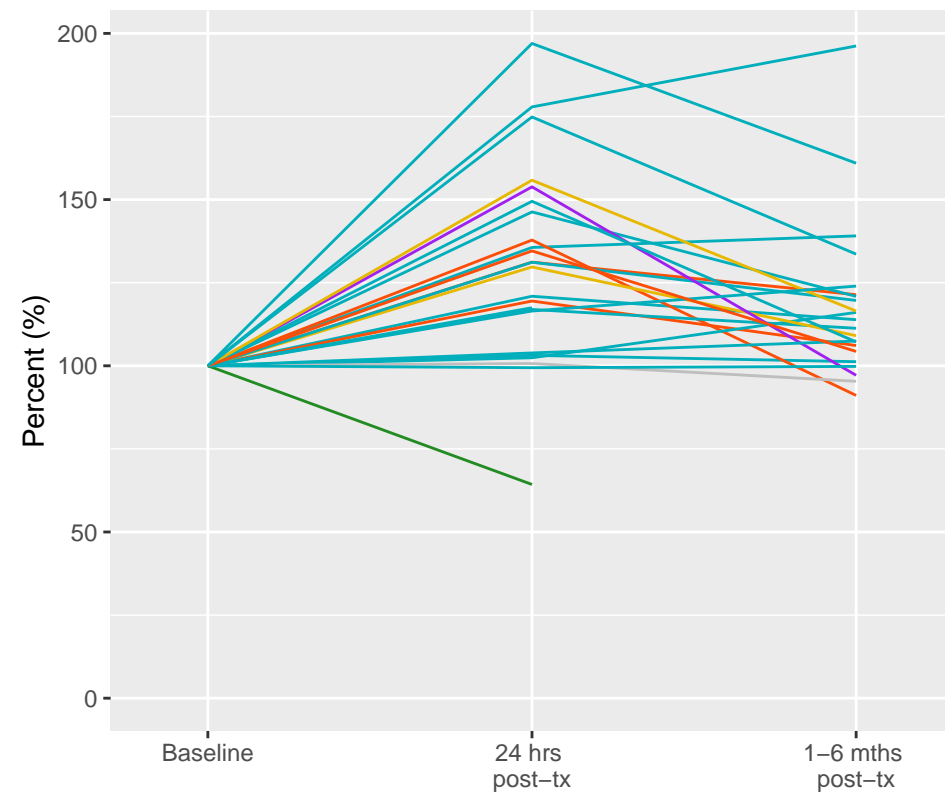

Histology

|             |            |       |           |                   |         |
|-------------|------------|-------|-----------|-------------------|---------|
| Chromophobe | Clear cell | Mixed | Papillary | TFE translocation | Unknown |
|-------------|------------|-------|-----------|-------------------|---------|

Uniprot ID: Q99717, analyte: MAD homolog 5

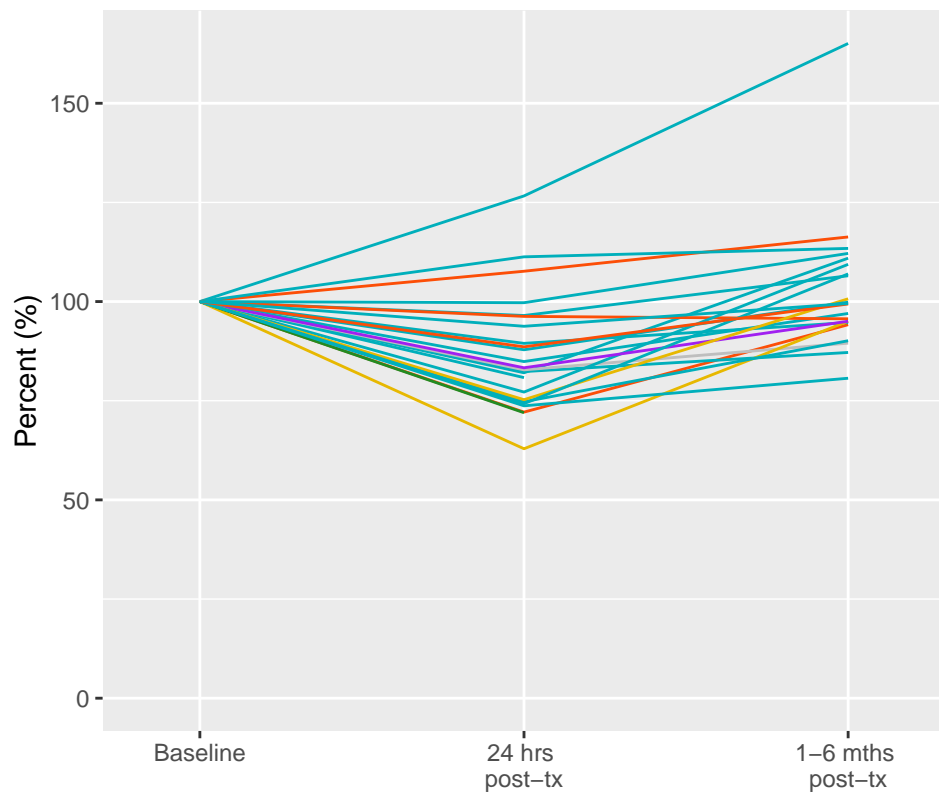

Uniprot ID: Q8TE58, analyte: ADAM-TS 15

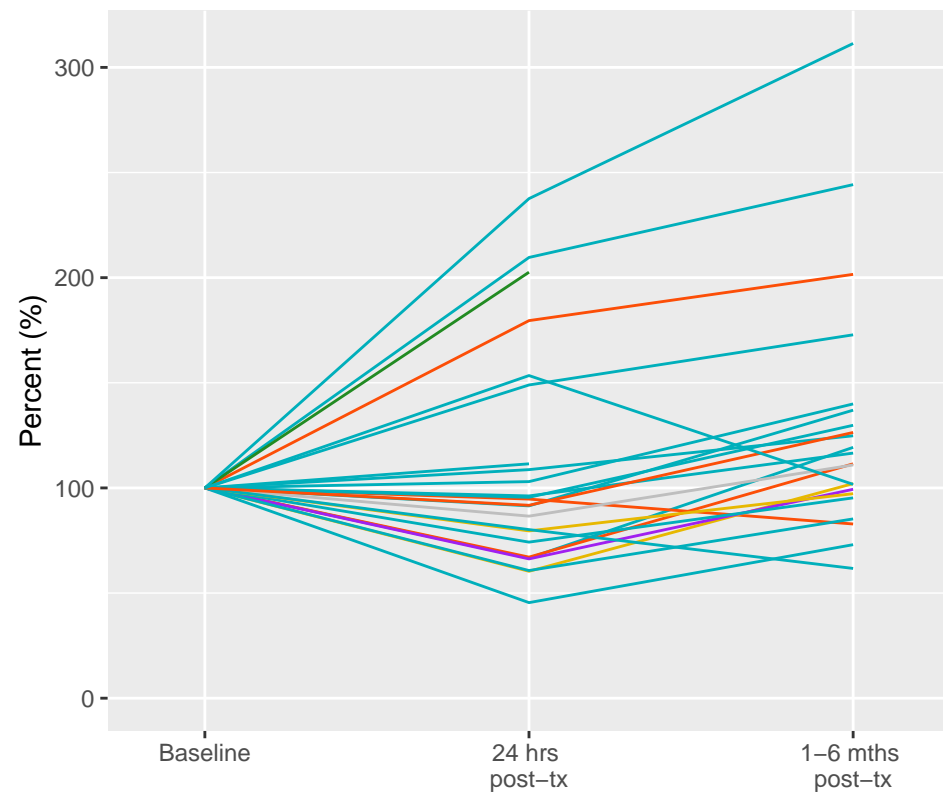

Uniprot ID: Q9BXY4, analyte: RSPO3

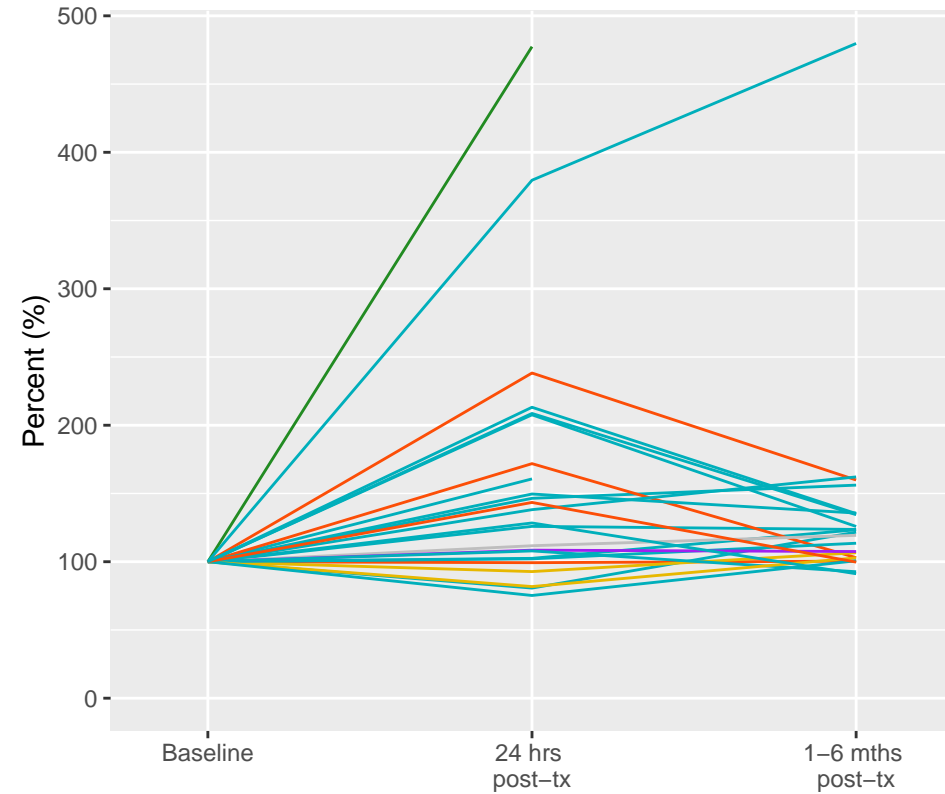

Histology

|             |            |       |           |                   |         |
|-------------|------------|-------|-----------|-------------------|---------|
| Chromophobe | Clear cell | Mixed | Papillary | TFE translocation | Unknown |
|-------------|------------|-------|-----------|-------------------|---------|

Uniprot ID: P41439, analyte: FR-gamma

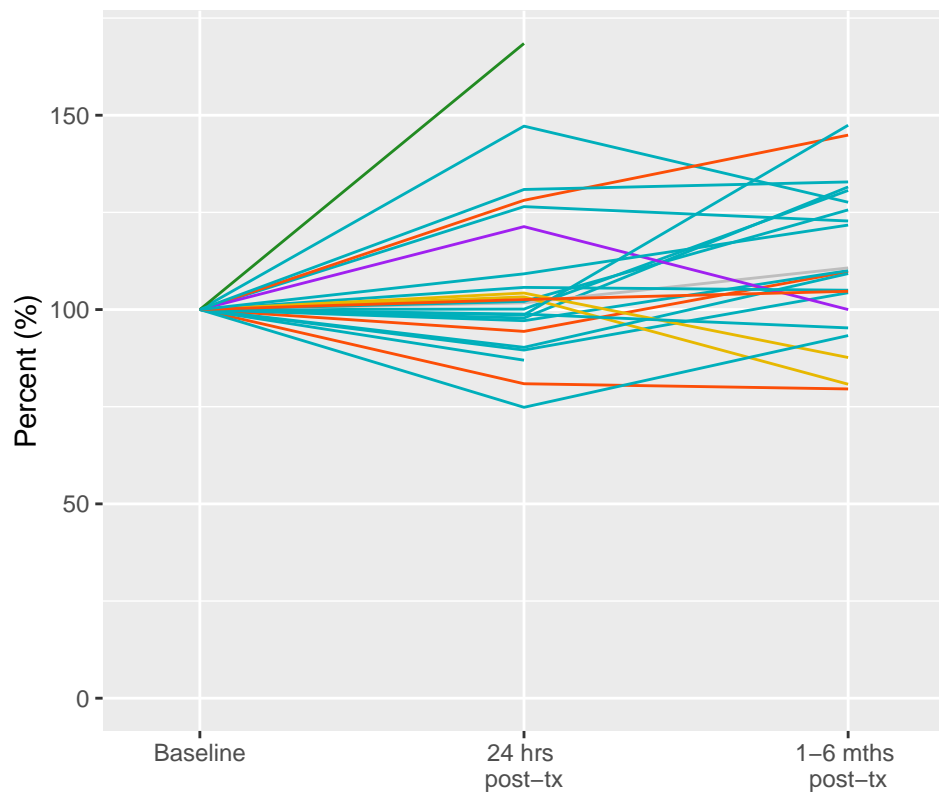

Uniprot ID: P06731, analyte: CEACAM5

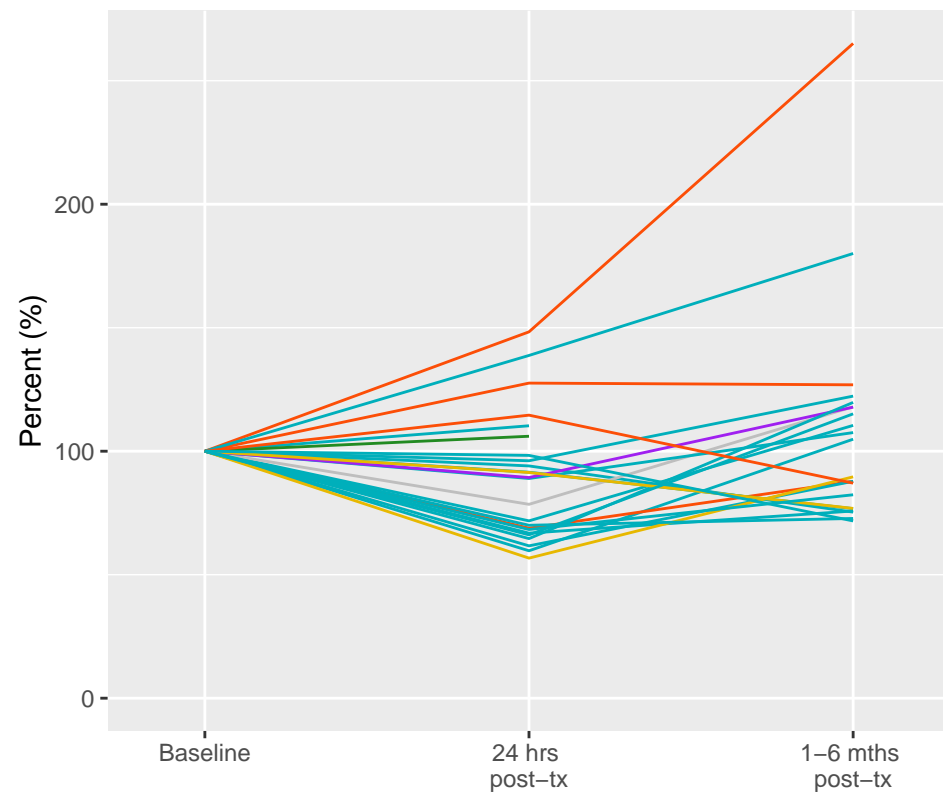

Uniprot ID: P35916, analyte: VEGFR-3

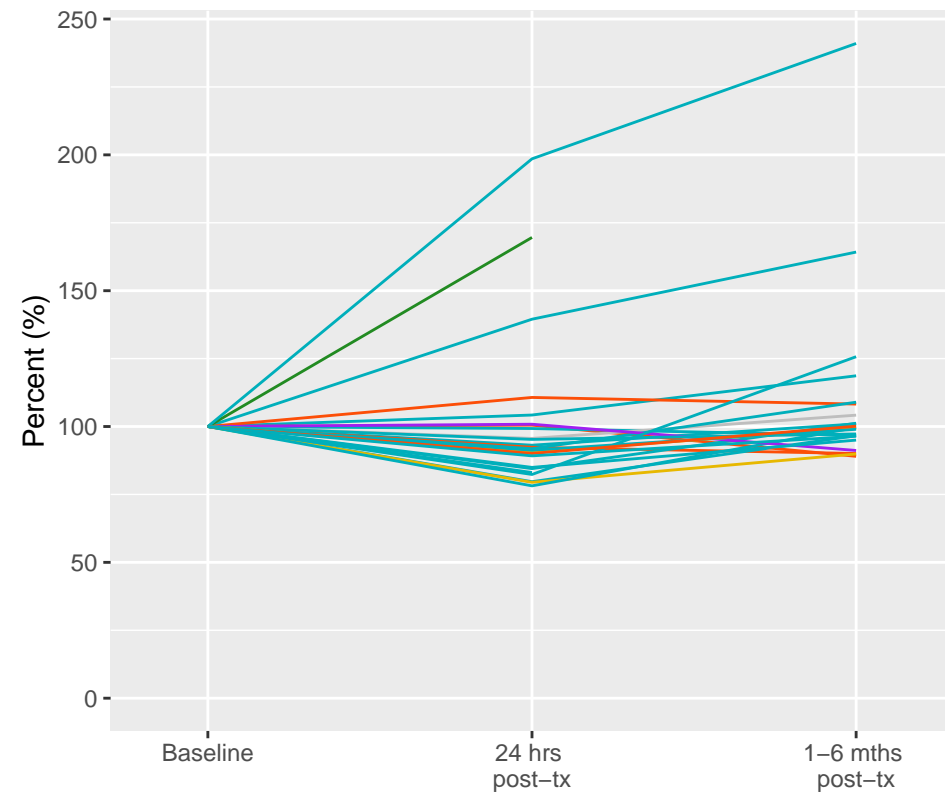

Histology

|             |            |       |           |                   |         |
|-------------|------------|-------|-----------|-------------------|---------|
| Chromophobe | Clear cell | Mixed | Papillary | TFE translocation | Unknown |
|-------------|------------|-------|-----------|-------------------|---------|

Uniprot ID: Q9Y5W5, analyte: WIF-1

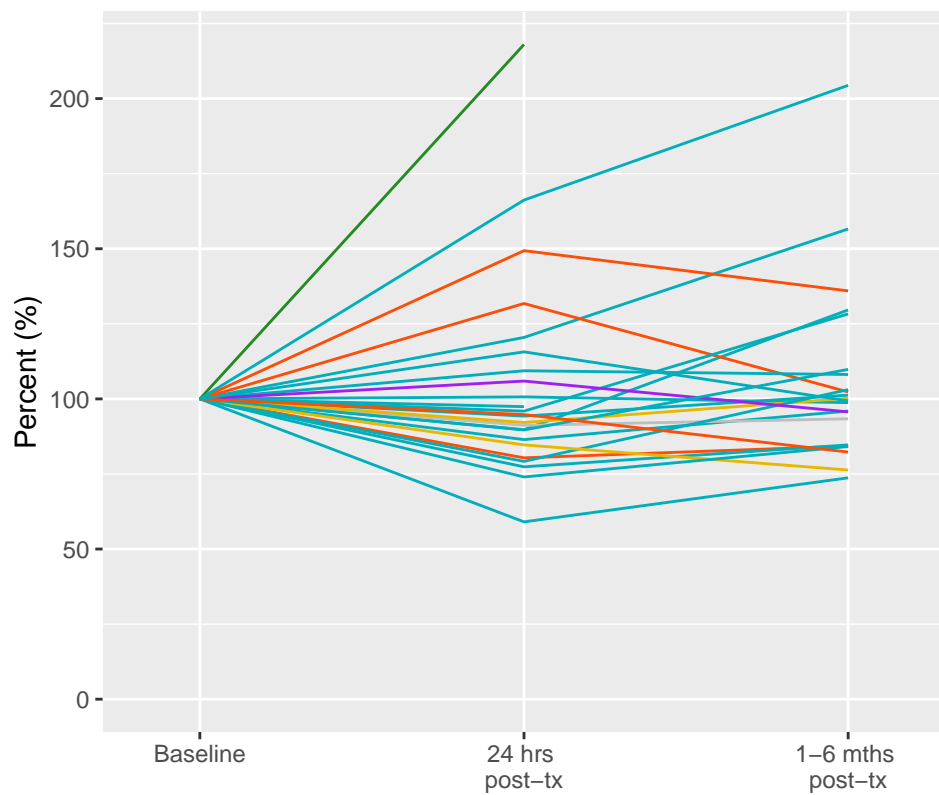

Uniprot ID: Q6BAA4, analyte: FCRLB

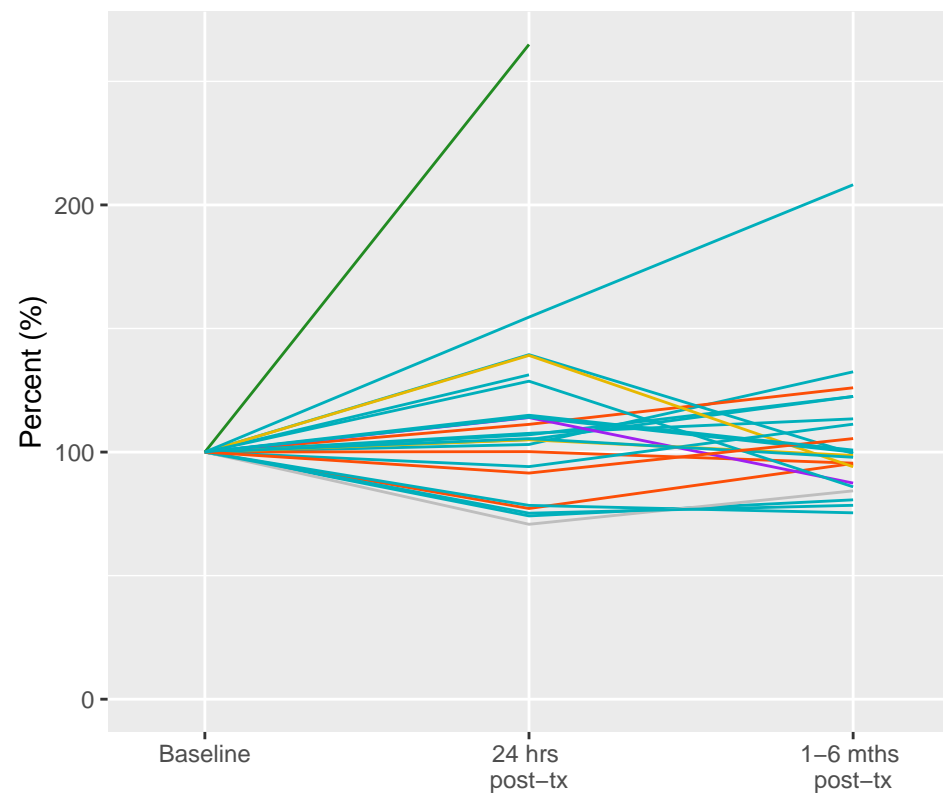

Uniprot ID: P04083, analyte: ANXA1

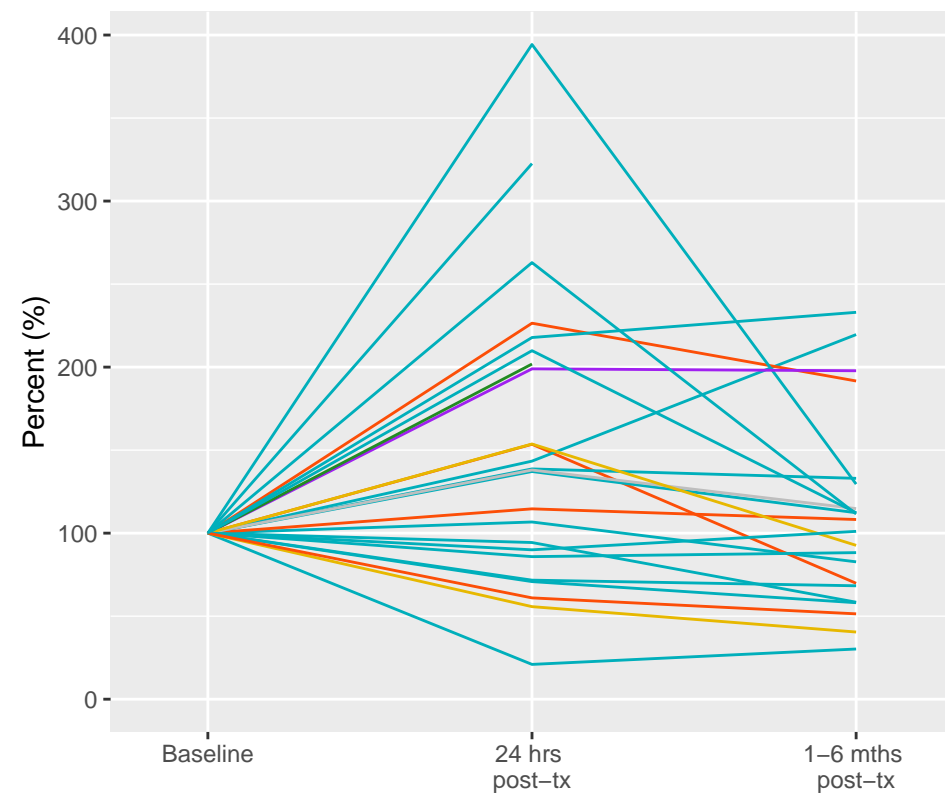

Histology

|             |            |       |           |                   |         |
|-------------|------------|-------|-----------|-------------------|---------|
| Chromophobe | Clear cell | Mixed | Papillary | TFE translocation | Unknown |
|-------------|------------|-------|-----------|-------------------|---------|



Uniprot ID: P15328, analyte: FR-alpha

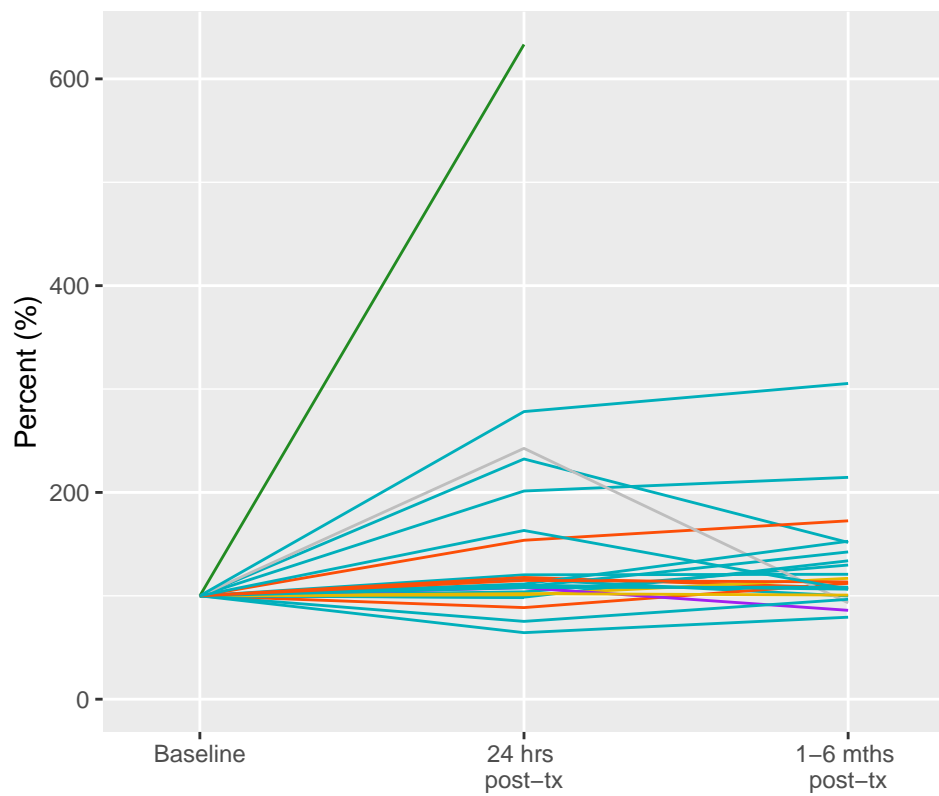

Histology

- Chromophobe
- Clear cell
- Mixed
- Papillary
- TFE translocation
- Unknown
