# Supplementary material for: An Exploratory Analysis of Changes in Circulating Plasma Protein Profiles Following Image-Guided Ablation of Renal Tumours Provides Evidence for Effects on Multiple Biological Processes
Source: MDPI journal article supplement (doi:10.3390/cancers13236037), 2021-11-30
Supplement: s1 [file s1]

**Table S3.** Plasma proteins increasing significantly 24 hours post-CRYO (TP3) compared with the reference baseline assessment (TP2) prior to CRYO (n=24 as one TP3 sample failed analytical QC) in a matched pair analysis (Wilcoxon signed rank test) Results are presented both as linear NPX medians and ranges for TP2 and TP3 and as percentage change for TP3 compared with baseline. The number of patients showing an increase of any magnitude in each protein is presented together with the number that also exceeded the baseline protein-specific variability. \*Due to changes in the Immuno-oncology panel, measurements for protein P40933 were only available in the 2020 dataset and so n=20 for that protein. \*\*Four proteins were on both panels with similar results for both, with those from the Immuno-oncology panel presented.

| Protein                                                       | Uniprot Accession Number | Baseline (TP2) linear NPX values | 24 hrs post-CRYO (TP3) linear NPX values | TP3 protein result as % of TP2 baseline; median (range) | Number of patients with increase | Number of patients with increase >IQR of baseline variability | p value | q value (FDR) |
|---------------------------------------------------------------|--------------------------|----------------------------------|------------------------------------------|---------------------------------------------------------|----------------------------------|---------------------------------------------------------------|---------|---------------|
| Interleukin-6 (IL-6)                                          | P05231**                 | 14.79 (7.79-45.04)               | 93.42 (22.87-528.47)                     | 518.7 (172.1-2917)                                      | 24 (100%)                        | 24 (100%)                                                     | <0.001  | <0.001        |
| Interleukin-10 (IL-10)                                        | P22301                   | 3.94 (1.65-8.34)                 | 8.74 (2.05-41.82)                        | 199.6 (79.6-721)                                        | 22 (91.7%)                       | 22 (91.7%)                                                    | <0.001  | <0.001        |
| C-C motif chemokine 23 (CCL23)                                | P55773                   | 1066.48 (520.15-2248.50)         | 1778.52 (1050.78-4052.33)                | 192.3 (94.4-338.6)                                      | 23 (95.8%)                       | 22 (91.7%)                                                    | <0.001  | <0.001        |
| Heme oxygenase 1 (HO-1)                                       | P09601                   | 3136.65 (1496.88-5337.35)        | 4713.55 (2807.34-6211.16)                | 140.9 (99.6-407.1)                                      | 23 (95.8%)                       | 21 (87.5%)                                                    | <0.001  | <0.001        |
| Endothelial cell-specific molecule 1 (ESM-1)                  | Q9NQ30                   | 286.49 (143.93-671.86)           | 537.71 (224.82-1037.62)                  | 177.7 (87.1-720.9)                                      | 22 (91.7%)                       | 21 (87.5%)                                                    | <0.001  | <0.001        |
| Decorin (DCN)                                                 | P07585                   | 14.91 (11.41-20.99)              | 16.39 (12.08-28.23)                      | 116.8 (86.1-175.1)                                      | 20 (83.3%)                       | 20 (83.3%)                                                    | <0.001  | <0.001        |
| Interleukin-15 (IL-15)                                        | P40933*                  | 22.48 (15.61-33.28)              | 32.28 (17.63-49.75)                      | 154.2 (77.3-229.1)                                      | 16 (80%)                         | 16 (80%)                                                      | <0.001  | <0.001        |
| Carbonic anhydrase-IX (CA-IX)                                 | Q16790**                 | 8.97 (3.48-43.07)                | 16.11 (6.26-51.53)                       | 147.6 (76.9-473.2)                                      | 21 (87.5%)                       | 19 (79.2%)                                                    | <0.001  | <0.001        |
| Macrophage colony stimulating factor 1 (CSF-1/M-CSF)          | P09603                   | 136.09 (59.52-195.06)            | 158.62 (53.10-218.28)                    | 116.8 (99.4-237.5)                                      | 22 (91.7%)                       | 18 (75%)                                                      | <0.001  | <0.001        |
| Tumour necrosis factor ligand superfamily member 14 (TNFSF14) | O43557                   | 8.01 (3.53-20.91)                | 10.98 (3.44-31.28)                       | 154.1 (49.1-360.4)                                      | 19 (79.2%)                       | 18 (75%)                                                      | <0.001  | 0.002         |
| Syndecan-1 (SYND1)                                            | P18827                   | 56.70 (25.11-129.54)             | 98.49 (30.06-231.30)                     | 174.3 (82.2-515.6)                                      | 22 (91.7%)                       | 18 (75%)                                                      | <0.001  | <0.001        |
| Transforming growth factor-alpha (TGFA)                       | P01135                   | 2.25 (1.11-5.15)                 | 2.82 (2.06-6.67)                         | 129.7 (81.2-488)                                        | 19 (79.2%)                       | 18 (75%)                                                      | <0.001  | 0.002         |

|                                                               |          |                        |                        |                     |            |            |        |        |
|---------------------------------------------------------------|----------|------------------------|------------------------|---------------------|------------|------------|--------|--------|
| Hepatocyte growth factor (HGF)                                | P14210** | 174.84 (94.59-407.48)  | 282.32 (124.50-841.86) | 145.0 (95.9-545.7)  | 23 (95.8%) | 18 (75%)   | <0.001 | <0.001 |
| WAP-four disulfide core domain protein 2 (WFDC2)              | Q14508   | 105.42 (57.56-296.07)  | 140.17 (66.26-273.31)  | 130.4 (64.3-197)    | 22 (91.7%) | 18 (75%)   | <0.001 | <0.001 |
| Amphiregulin (AREG)                                           | P15514   | 3.09 (1.43-12.09)      | 3.86 (2.64-13.53)      | 140.5 (71.7-373.1)  | 21 (87.5%) | 18 (75%)   | <0.001 | 0.002  |
| Protein S100-A11 (S100-A11)                                   | P31949   | 4.76 (3.25-10.53)      | 5.69 (3.41-19.20)      | 126.5 (79.6-224.5)  | 20 (83.3%) | 18 (75%)   | <0.001 | <0.001 |
| Ephrin type-A receptor 2 (EPHA2)                              | P29317   | 2.42 (1.52-4.95)       | 2.92 (2.03-8.80)       | 114.1 (58.6-246.7)  | 20 (83.3%) | 17 (70.8%) | <0.001 | 0.004  |
| Placenta growth factor (PIGF)                                 | P49763   | 292.36 (90.58-758.38)  | 339.32 (172.57-720.33) | 126.0 (79.6-235.7)  | 20 (83.3%) | 17 (70.8%) | <0.001 | 0.001  |
| Fibroblast growth factor-binding protein 1 (FGFBP1)           | Q14512   | 17.82 (9.85-24.79)     | 22.07 (7.98-156.96)    | 125.7 (76.1-706.6)  | 18 (75%)   | 17 (70.8%) | 0.001  | 0.005  |
| T cell surface glycoprotein CD5 (CD5)                         | P06127   | 19.04 (12.95-35.34)    | 23.52 (11.53-56.02)    | 118.8 (84.7-192.5)  | 20 (83.3%) | 16 (66.7%) | <0.001 | <0.001 |
| Pleiotrophin (PTN)                                            | P21246   | 5.07 (1.22-46.97)      | 10.86 (1.39-98.47)     | 207.2 (49.8-4195.3) | 19 (79.2%) | 16 (66.7%) | <0.001 | 0.002  |
| Tissue factor pathway inhibitor 2 (TFPI-2)                    | P48307   | 139.03 (107.59-289.35) | 198.83 (85.49-657)     | 134.7 (47.5-290.1)  | 19 (79.2%) | 16 (66.7%) | <0.001 | 0.004  |
| Galectin-1 (GAL-1)                                            | P09382   | 58.74 (25.90-81.24)    | 68.59 (25.36-92.17)    | 111.8 (74.5-183.6)  | 18 (75%)   | 15 (62.5%) | 0.002  | 0.003  |
| R-spondin 3 (RSPO3)                                           | Q9BXY4   | 8.79 (5.40-31.80)      | 13.30 (5.74-103.36)    | 133.3 (75.3-477.4)  | 19 (79.2%) | 15 (62.5%) | <0.001 | 0.002  |
| Monocyte chemotactic protein 3 (MCP-3)                        | P80098   | 2.72 (1.38-7.02)       | 3.94 (1.29-11.64)      | 152.6 (52.9-330.5)  | 19 (79.2%) | 14 (58.3%) | <0.001 | 0.001  |
| Interleukin-8 (IL-8)                                          | P10145   | 48.18 (21.36-90.23)    | 74.33 (22.19-154.55)   | 154.1 (59.7-348.1)  | 18 (75%)   | 13 (54.2%) | <0.001 | 0.002  |
| Vascular endothelial growth factor-A (VEGF-A)                 | P15692   | 302.93 (94.88-545.93)  | 353.83 (151.09-709.86) | 124.3 (80.6-230.6)  | 18 (75%)   | 12 (50%)   | <0.001 | 0.002  |
| CD27 antigen (CD27)                                           | P26842** | 184.72 (79.24-447.18)  | 217.72 (123.38-469.03) | 110.5 (85.5-170.1)  | 21 (87.5%) | 12 (50%)   | <0.001 | <0.001 |
| Tumour necrosis factor ligand superfamily member 13 (TNFSF13) | O75888   | 227.01 (125.01-484.84) | 284.94 (120.35-596.60) | 112.5 (71.8-245.1)  | 18 (75%)   | 12 (50%)   | 0.001  | 0.005  |
