# Supplementary material for: An Exploratory Analysis of Changes in Circulating Plasma Protein Profiles Following Image-Guided Ablation of Renal Tumours Provides Evidence for Effects on Multiple Biological Processes
Source: MDPI journal article supplement (doi:10.3390/cancers13236037), 2021-11-30
Supplement: s1 [file s1]

**Table S4.** Plasma proteins decreasing significantly 24 hours post-CRYO (TP3) compared with the reference baseline assessment (TP2) prior to CRYO (n=24 as one TP3 sample failed analytical QC) in a matched pair analysis (Wilcoxon signed rank test). Results are presented both as linear NPX medians and ranges for TP2 and TP3 and as percentage change for TP3 compared with baseline. The number of patients showing a decrease of any magnitude in each protein is presented together with the number that also exceeded the baseline protein-specific variability. \*Two proteins were on both panels with similar results for both, with those from the Immuno-oncology panel presented.

| Protein                                                   | Uniprot Accession Number | Baseline (TP2) linear NPX values | 24 hrs post-ablation (TP3) linear NPX values | TP3 protein result as % of TP2 baseline; median (range) | Number of patients with decrease | Number of patients with decrease >IQR of baseline variability | p value | q value (FDR) |
|-----------------------------------------------------------|--------------------------|----------------------------------|----------------------------------------------|---------------------------------------------------------|----------------------------------|---------------------------------------------------------------|---------|---------------|
| TNF-related apoptosis inducing ligand (TRAIL)             | P50591*                  | 183.25 (87.80-257.57)            | 128.00 (68.11-199.47)                        | 72.3 (45.1-132.5)                                       | 23 (95.8%)                       | 22 (91.7%)                                                    | <0.001  | <0.001        |
| C-X-C motif chemokine 10 (CXCL10)                         | P02778                   | 256.15 (141.33-1314.23)          | 151.03 (46.94-688.18)                        | 64.1 (42.3-186)                                         | 21 (87.5%)                       | 20 (83.3%)                                                    | <0.001  | <0.001        |
| C-X-C motif chemokine 11 (CXCL11)                         | O14625                   | 104.67 (31.34-2288.20)           | 61.93 (16.80-1398.57)                        | 55.8 (2.8-155)                                          | 23 (95.8%)                       | 20 (83.3%)                                                    | <0.001  | <0.001        |
| Interferon gamma (IFN-gamma)                              | P01579                   | 1.22 (0.42-5.45)                 | 0.53 (0.09-4.21)                             | 55.0 (8.8-102.2)                                        | 20 (83.3%)                       | 20 (83.3%)                                                    | <0.001  | <0.001        |
| Mothers against decapentaplegic homolog 5 (MAD homolog 5) | Q99717                   | 7.58 (4.73-9.58)                 | 6.60 (5.08-8.02)                             | 83.0 (62.9-126.6)                                       | 21 (87.5%)                       | 18 (75%)                                                      | <0.001  | <0.001        |
| Monocyte chemotactic protein 2 (MCP-2)                    | P80075                   | 99.02 (29.75-223.06)             | 69.85 (43.56-130.56)                         | 72.3 (45.1-146.4)                                       | 22 (91.7%)                       | 17 (70.8%)                                                    | <0.001  | <0.001        |
| Monocyte chemotactic protein 4 (MCP-4)                    | Q99616                   | 212.57(119.29-544.06)            | 133.25 (54.28-444.91)                        | 59.2 (13.5-146.5)                                       | 23 (95.8%)                       | 17 (70.8%)                                                    | <0.001  | <0.001        |
| T cell-specific surface glycoprotein CD28 (CD28)          | P10747                   | 1.94 (1.09-4.10)                 | 1.63 (0.82-3.81)                             | 88.6 (62.5-137.2)                                       | 17 (70.8%)                       | 16 (66.7%)                                                    | 0.005   | 0.009         |
| Fas ligand (FASL)                                         | P48023*                  | 46.48 (23.22-127.89)             | 38.36 (19.02-95.40)                          | 80.2 (66-116.8)                                         | 20 (83.3%)                       | 16 (66.7%)                                                    | <0.001  | 0.001         |
| Matrix metalloproteinase-12 (MMP-12)                      | P39900                   | 168.38 (54.35-543.21)            | 151.83 (50.48-357.36)                        | 77.9 (52.4-124.7)                                       | 20 (83.3%)                       | 16 (66.7%)                                                    | <0.001  | <0.001        |
| Proto-oncogene tyrosine-protein kinase receptor Ret (RET) | P07949                   | 8.56 (3.57-16.85)                | 6.28 (3.90-13.88)                            | 79.2 (50.5-213.4)                                       | 20 (83.3%)                       | 15 (62.5%)                                                    | 0.002   | 0.007         |

|                                                           |        |                            |                         |                      |            |            |        |       |
|-----------------------------------------------------------|--------|----------------------------|-------------------------|----------------------|------------|------------|--------|-------|
| Cathepsin L2 (CTSV)                                       | O60911 | 5.52 (2.37-26.14)          | 4.20 (2.78-7.72)        | 77.5<br>(11.9-117.3) | 18 (75%)   | 15 (62.5%) | <0.001 | 0.004 |
| Vascular endothelial growth factor receptor 2 (VEGFR-2)   | P35968 | 92.10 (55.41-137.53)       | 81.46 (48.04-106.89)    | 91.4<br>(72.7-127.9) | 20 (83.3%) | 14 (58.3%) | 0.001  | 0.003 |
| Angiopoietin-1 (ANGPT-1)                                  | Q15389 | 243.88 (51.44-1016.60)     | 139.35 (45.80-621.91)   | 63.4<br>(23-199.7)   | 19 (79.2%) | 14 (58.3%) | 0.003  | 0.005 |
| Platelet-derived growth factor subunit B (PDGF subunit B) | P01127 | 990.83<br>(198.17-1890.24) | 765.56 (162.63-1639.06) | 69.3<br>(32-208)     | 20 (83.3%) | 12 (50%)   | <0.001 | 0.002 |
| Natural killer cell receptor 2B4 (CD244)                  | Q9BZW8 | 46.97 (21.93-118.96)       | 39.75 (17.55-76.83)     | 84.4<br>(64.6-181.3) | 17 (70.8%) | 11 (45.8%) | 0.004  | 0.007 |
| Fibroblast growth factor 2 (FGF-2)                        | P09038 | 1.50 (0.96-56.91)          | 1.29 (0.60-5.08)        | 81.4<br>(1.8-200.2)  | 18 (75%)   | 11 (45.8%) | 0.001  | 0.003 |
| C-X-C motif chemokine 5 (CXCL5)                           | P42830 | 845.36<br>(105.59-4482.71) | 402.68 (103.13-4953.03) | 61.0<br>(15.7-358.5) | 20 (83.3%) | 9 (37.5%)  | <0.001 | 0.002 |
