# Supplementary material for: An Exploratory Analysis of Changes in Circulating Plasma Protein Profiles Following Image-Guided Ablation of Renal Tumours Provides Evidence for Effects on Multiple Biological Processes
Source: Cancers (Basel). 2021 Nov 30;13(23):6037. doi: 10.3390/cancers13236037 (PMC8656737; doi:10.3390/cancers13236037)
Supplement: Supplementary file 1 [file cancers-13-06037-s001.zip]

Archive with 16 entries (16 files):
- Supplementary File/Figure S1.pdf
- Supplementary File/Figure S10.pdf
- Supplementary File/Figure S11.pdf
- Supplementary File/Figure S12.pdf
- Supplementary File/Figure S2.pdf
- Supplementary File/Figure S3.pdf
- Supplementary File/Figure S4.pdf
- Supplementary File/Figure S5.pdf
- Supplementary File/Figure S6.pdf
- Supplementary File/Figure S7.pdf
- Supplementary File/Figure S8.pdf
- Supplementary File/Figure S9.pdf
- Supplementary File/Table S1.xlsx
- Supplementary File/Table S2.pdf
- Supplementary File/Table S3.pdf
- Supplementary File/Table S4.pdf
