# Supplementary material for: An Exploratory Analysis of Changes in Circulating Plasma Protein Profiles Following Image-Guided Ablation of Renal Tumours Provides Evidence for Effects on Multiple Biological Processes
Source: Cancers (Basel). 2021 Nov 30;13(23):6037. doi: 10.3390/cancers13236037 (PMC8656737; doi:10.3390/cancers13236037)
Supplement: Supplementary file 1 [file cancers-13-06037-s001.zip › Supplementary File/Table S1.xlsx]

## Sheet: Sheet1
Patient identifier	Gender	Age at procedure	RCC subtype	Laterality	Tumor Size (mm)	Procedure	Number of cryoprobes	Ablation time (seconds)	Complications	Co-morbidities
1	Female	74	clear cell	Right	33	Cryo	6	2400	none	solitary kidney
2	Male	68	insufficient tissue	Left	54	Cryo	7	1800	none	CKD, Peyronie's disease, IHD, COPD
3	Male	73	clear cell	Right	31	Cryo	4	1875	none	HTN, CKD, PVD, IHD
4	Male	38	clear cell	Right	20	Cryo	5	1890	none	none
5	Female	67	clear cell	Left	20	Microwave	N/A	300	none	raised BMI, CKD, DM
6	Male	43	clear cell	Right	30	Cryo	4	1890	none	VHL
7	Female	72	clear cell	Right	30	Cryo	6	1200	small RP hematoma, fever peaking at d2	HTN
8	Female	68	papillary	Right	33	Cryo	4	1995	none	COPD
9	Male	78	clear cell	Right	39	Cryo	6	1800	none	raised BMI, AF, HTN
10	Male	69	papillary	Right	28	Cryo	4	2280	none	none
11	Male	80	clear cell	Left	33	Cryo	6	1950	none	AF
12	Male	64	clear cell	Left	30	Cryo	4	1880	none	solitary kidney, HTN
13	Female	70	clear cell	Right	19	Cryo	5	1200	none	none
14	Male	79	clear cell	Right	42	Cryo	6	1890	AKI G3, bladder clot retention requiring irrigation	CKD, HTN
15	Male	63	clear cell	Left	22	Microwave	N/A	300	none	none
16	Male	60	papillary	Left	37	Cryo	6	1200	none	none
17	Male	77	clear cell	Right	38	Cryo	6	1200	none	DM, COPD
18	Male	69	papillary	Right	41	Cryo	5	1860	none	PVD, DM
19	Male	54	clear cell	Right	29	Cryo	4	1860	none	raised BMI
20	Female	79	clear cell	Right	24	Cryo	4	1860	none	solitary kidney, IHD
21	Female	64	chromophobe	Left	42	Cryo	9	1920	none	none
22	Male	72	clear cell	Right	30	Cryo	8	2820	none	solitary kidney
23	Male	71	chromophobe or clear cell	Left	39	Cryo	8	2160	none	none
24	Female	86	Xp11.2/TFE3 translocation	Right	50	Cryo	6	1980	deranged U&Es, nausea	solitary kidney
25	Male	71	Clear cell	Left	20	RFA	N/A	1051	none	solitary kidney
26	Female	76	Clear cell	Left	20	RFA	N/A	955	none	hypertension
28	Female	71	Clear cell	Left	32	Cryo	5	1920	none	diverticulitis
29	Male	65	Clear cell	Right	26	RFA	N/A	1603	none	none
30	Male	54	chromophobe	Right	41	Cryo	11	2160	none	HTN, coeliac disease
31	Female	76	chromophobe	Right	23	RFA	N/A	1896	none	Fe-deficient anaemia, osteoporosis, HTN
32	Male	75	Clear cell	Left	42	Cryo	8	2100	none	anaemia
33	Male	66	Clear cell	Right	27	RFA	N/A	1160	none	HTN, depression, obesity, IHD, DM
34	Female	76	Clear cell	Left	32	RFA	N/A	2853	none	none
35	Male	78	Clear cell	Left	28	RFA	N/A	1264	none	none
36	Female	68	Clear cell	Left	25	RFA	N/A	1236	none	solitary kidney
